# Supplementary material for: Chiral Polymers from Norbornenes Based on Renewable Chemical Feedstocks
Source: Polymers (Basel). 2022 Dec 13;14(24):5453. doi: 10.3390/polym14245453 (PMC9786787; doi:10.3390/polym14245453)

|                               |                                 |
|-------------------------------|---------------------------------|
| R(reflections)= 0.0926( 3526) | wR2(reflections)= 0.2202( 4665) |
| S = 1.003                     | Npar= 305                       |

---

The following ALERTS were generated. Each ALERT has the format

**test-name\_ALERT\_alert-type\_alert-level.**

Click on the hyperlinks for more details of the test.

---

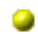

### Alert level C

RINTA01\_ALERT\_3\_C The value of Rint is greater than 0.12  
Rint given 0.166  
STRVA01\_ALERT\_4\_C Flack test results are meaningless.  
From the CIF: \_refine\_ls\_abs\_structure\_Flack 0.000  
From the CIF: \_refine\_ls\_abs\_structure\_Flack\_su 1.000  
PLAT018\_ALERT\_1\_C \_diffn\_measured\_fraction\_theta\_max .NE. \*\_full ! Check  
PLAT020\_ALERT\_3\_C The Value of Rint is Greater Than 0.12 ..... 0.166 Report  
PLAT340\_ALERT\_3\_C Low Bond Precision on C-C Bonds ..... 0.00903 Ang.  
PLAT906\_ALERT\_3\_C Large K Value in the Analysis of Variance ..... 6.942 Check  
PLAT911\_ALERT\_3\_C Missing FCF Refl Between Thmin & STh/L= 0.595 23 Report

---

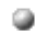

### Alert level G

PLAT032\_ALERT\_4\_G Std. Uncertainty on Flack Parameter Value High . 1.000 Report  
PLAT791\_ALERT\_4\_G Model has Chirality at C1 (Sohnke SpGr) S Verify  
PLAT791\_ALERT\_4\_G Model has Chirality at C2 (Sohnke SpGr) R Verify  
PLAT791\_ALERT\_4\_G Model has Chirality at C3 (Sohnke SpGr) R Verify  
PLAT791\_ALERT\_4\_G Model has Chirality at C6 (Sohnke SpGr) S Verify  
PLAT791\_ALERT\_4\_G Model has Chirality at C9 (Sohnke SpGr) S Verify  
PLAT791\_ALERT\_4\_G Model has Chirality at C10 (Sohnke SpGr) R Verify  
PLAT791\_ALERT\_4\_G Model has Chirality at C13 (Sohnke SpGr) S Verify  
PLAT791\_ALERT\_4\_G Model has Chirality at C20 (Sohnke SpGr) S Verify  
PLAT791\_ALERT\_4\_G Model has Chirality at C21 (Sohnke SpGr) R Verify  
PLAT791\_ALERT\_4\_G Model has Chirality at C24 (Sohnke SpGr) S Verify  
PLAT850\_ALERT\_4\_G Check Flack Parameter Exact Value 0.00 with s.u. 1.00 Check  
PLAT909\_ALERT\_3\_G Percentage of I>2sig(I) Data at Theta(Max) Still 54% Note  
PLAT910\_ALERT\_3\_G Missing # of FCF Reflection(s) Below Theta(Min). 2 Note  
PLAT916\_ALERT\_2\_G Hooft y and Flack x Parameter Values Differ by . 1.00 Check  
PLAT933\_ALERT\_2\_G Number of HKL-OMIT Records in Embedded .res File 1 Note  
PLAT963\_ALERT\_2\_G Both SHELXL WEIGHT Parameter Values Zero ..... Please Check  
PLAT967\_ALERT\_5\_G Note: Two-Theta Cutoff Value in Embedded .res .. 50.0 Degree  
PLAT978\_ALERT\_2\_G Number C-C Bonds with Positive Residual Density. 1 Info

---

- 0 **ALERT level A** = Most likely a serious problem - resolve or explain  
0 **ALERT level B** = A potentially serious problem, consider carefully  
7 **ALERT level C** = Check. Ensure it is not caused by an omission or oversight  
19 **ALERT level G** = General information/check it is not something unexpected

- 1 ALERT type 1 CIF construction/syntax error, inconsistent or missing data  
4 ALERT type 2 Indicator that the structure model may be wrong or deficient  
7 ALERT type 3 Indicator that the structure quality may be low  
13 ALERT type 4 Improvement, methodology, query or suggestion  
1 ALERT type 5 Informative message, check
- 
-

It is advisable to attempt to resolve as many as possible of the alerts in all categories. Often the minor alerts point to easily fixed oversights, errors and omissions in your CIF or refinement strategy, so attention to these fine details can be worthwhile. In order to resolve some of the more serious problems it may be necessary to carry out additional measurements or structure refinements. However, the purpose of your study may justify the reported deviations and the more serious of these should normally be commented upon in the discussion or experimental section of a paper or in the "special\_details" fields of the CIF. checkCIF was carefully designed to identify outliers and unusual parameters, but every test has its limitations and alerts that are not important in a particular case may appear. Conversely, the absence of alerts does not guarantee there are no aspects of the results needing attention. It is up to the individual to critically assess their own results and, if necessary, seek expert advice.

### **Publication of your CIF in IUCr journals**

A basic structural check has been run on your CIF. These basic checks will be run on all CIFs submitted for publication in IUCr journals (*Acta Crystallographica*, *Journal of Applied Crystallography*, *Journal of Synchrotron Radiation*); however, if you intend to submit to *Acta Crystallographica Section C* or *E* or *IUCrData*, you should make sure that full publication checks are run on the final version of your CIF prior to submission.

### **Publication of your CIF in other journals**

Please refer to the *Notes for Authors* of the relevant journal for any special instructions relating to CIF submission.

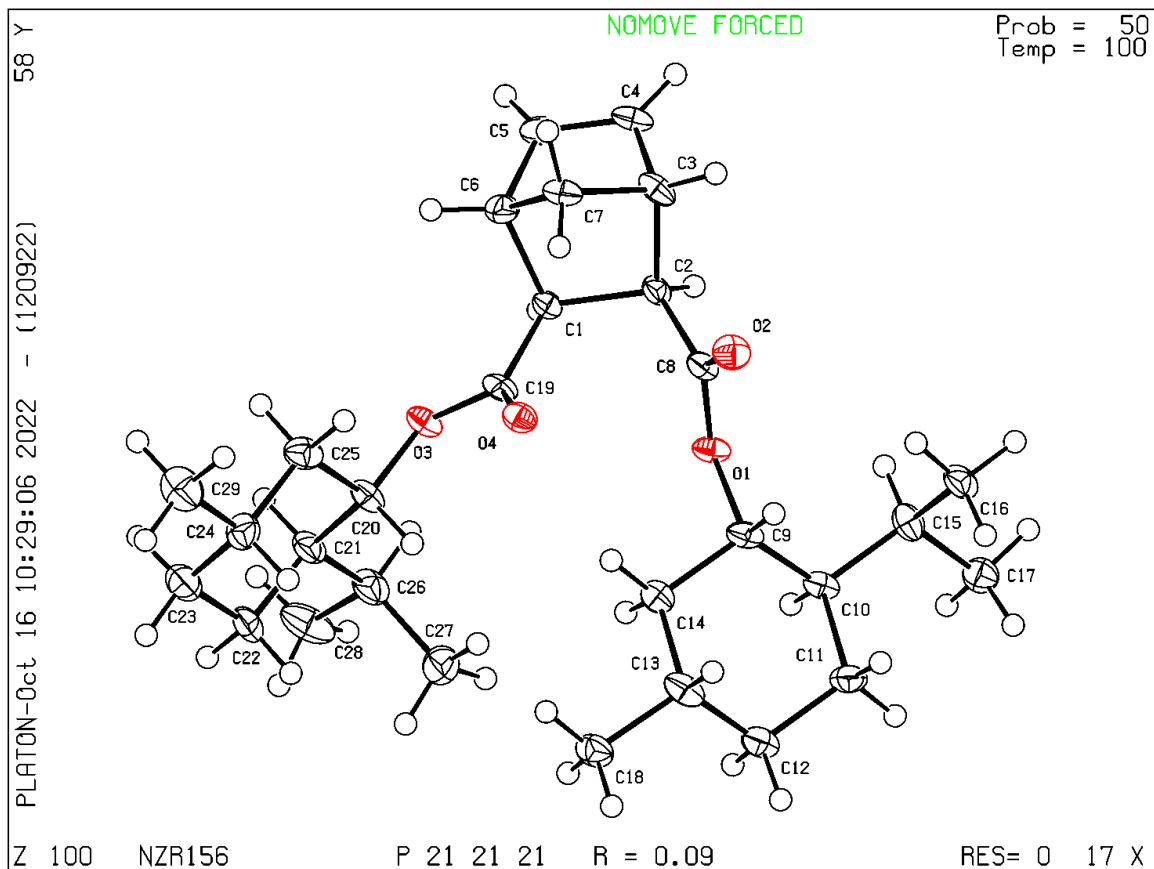

Supplement: Supplementary file 1 [file polymers-14-05453-s001.zip › checkcif_NZR156.pdf]
