# Supplementary material for: Chiral Polymers from Norbornenes Based on Renewable Chemical Feedstocks
Source: Polymers (Basel). 2022 Dec 13;14(24):5453. doi: 10.3390/polym14245453 (PMC9786787; doi:10.3390/polym14245453)

## checkCIF/PLATON report

Structure factors have been supplied for datablock(s) NZR3711

THIS REPORT IS FOR GUIDANCE ONLY. IF USED AS PART OF A REVIEW PROCEDURE FOR PUBLICATION, IT SHOULD NOT REPLACE THE EXPERTISE OF AN EXPERIENCED CRYSTALLOGRAPHIC REFEREE.

No syntax errors found.      CIF dictionary      Interpreting this report

### Datablock: NZR3711

---

|                        |                |                    |                |
|------------------------|----------------|--------------------|----------------|
| Bond precision:        | C-C = 0.0065 A | Wavelength=1.54178 |                |
| Cell:                  | a=23.4647 (18) | b=5.7765 (4)       | c=21.9950 (17) |
|                        | alpha=90       | beta=115.155 (4)   | gamma=90       |
| Temperature:           | 120 K          |                    |                |
|                        | Calculated     | Reported           |                |
| Volume                 | 2698.6 (4)     | 2698.5 (4)         |                |
| Space group            | C 2            | C 1 2 1            |                |
| Hall group             | C 2y           | C 2y               |                |
| Moiety formula         | C29 H46 O4     | C29 H46 O4         |                |
| Sum formula            | C29 H46 O4     | C29 H46 O4         |                |
| Mr                     | 458.66         | 458.66             |                |
| Dx, g cm <sup>-3</sup> | 1.129          | 1.129              |                |
| Z                      | 4              | 4                  |                |
| Mu (mm <sup>-1</sup> ) | 0.571          | 0.571              |                |
| F000                   | 1008.0         | 1008.0             |                |
| F000'                  | 1010.78        |                    |                |
| h, k, lmax             | 27, 6, 25      | 27, 6, 25          |                |
| Nref                   | 4599 [ 2552]   | 4051               |                |
| Tmin, Tmax             | 0.966, 0.977   | 0.512, 0.753       |                |
| Tmin'                  | 0.944          |                    |                |

Correction method= # Reported T Limits: Tmin=0.512 Tmax=0.753  
AbsCorr = MULTI-SCAN

Data completeness= 1.59/0.88      Theta(max)= 64.951

|                                |                   |
|--------------------------------|-------------------|
| R(reflections)= 0.0499 ( 3131) | wR2(reflections)= |
| S = 1.069                      | 0.1461 ( 4051)    |
| Npar= 306                      |                   |

---

The following ALERTS were generated. Each ALERT has the format

**test-name\_ALERT\_alert-type\_alert-level.**

Click on the hyperlinks for more details of the test.

---

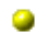

#### Alert level C

THETM01\_ALERT\_3\_C The value of  $\sin(\theta_{\max})/\lambda$  is less than 0.590  
Calculated  $\sin(\theta_{\max})/\lambda = 0.5876$   
PLAT018\_ALERT\_1\_C \_diffn\_measured\_fraction\_theta\_max .NE. \*\_full ! Check  
PLAT230\_ALERT\_2\_C Hirshfeld Test Diff for O2 --C8 . 5.3 s.u.  
PLAT340\_ALERT\_3\_C Low Bond Precision on C-C Bonds ..... 0.00647 Ang.  
PLAT911\_ALERT\_3\_C Missing FCF Refl Between Thmin & STh/L= 0.588 90 Report  
PLAT915\_ALERT\_3\_C No Flack x Check Done: Low Friedel Pair Coverage 78 %

---

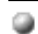

#### Alert level G

PLAT032\_ALERT\_4\_G Std. Uncertainty on Flack Parameter Value High . 0.400 Report  
PLAT791\_ALERT\_4\_G Model has Chirality at C1 (Sohnke SpGr) R Verify  
PLAT791\_ALERT\_4\_G Model has Chirality at C2 (Sohnke SpGr) S Verify  
PLAT791\_ALERT\_4\_G Model has Chirality at C3 (Sohnke SpGr) R Verify  
PLAT791\_ALERT\_4\_G Model has Chirality at C6 (Sohnke SpGr) S Verify  
PLAT791\_ALERT\_4\_G Model has Chirality at C9 (Sohnke SpGr) R Verify  
PLAT791\_ALERT\_4\_G Model has Chirality at C10 (Sohnke SpGr) S Verify  
PLAT791\_ALERT\_4\_G Model has Chirality at C13 (Sohnke SpGr) R Verify  
PLAT791\_ALERT\_4\_G Model has Chirality at C20 (Sohnke SpGr) R Verify  
PLAT791\_ALERT\_4\_G Model has Chirality at C21 (Sohnke SpGr) S Verify  
PLAT791\_ALERT\_4\_G Model has Chirality at C24 (Sohnke SpGr) R Verify  
PLAT850\_ALERT\_4\_G Check Flack Parameter Exact Value 0.00 with s.u. 0.40 Check  
PLAT909\_ALERT\_3\_G Percentage of  $I > 2\sigma(I)$  Data at  $\theta(\text{Max})$  Still 39% Note  
PLAT933\_ALERT\_2\_G Number of HKL-OMIT Records in Embedded .res File 1 Note  
PLAT967\_ALERT\_5\_G Note: Two-Theta Cutoff Value in Embedded .res .. 130.0 Degree  
PLAT978\_ALERT\_2\_G Number C-C Bonds with Positive Residual Density. 0 Info

---

- 0 **ALERT level A** = Most likely a serious problem - resolve or explain  
0 **ALERT level B** = A potentially serious problem, consider carefully  
6 **ALERT level C** = Check. Ensure it is not caused by an omission or oversight  
16 **ALERT level G** = General information/check it is not something unexpected

- 1 ALERT type 1 CIF construction/syntax error, inconsistent or missing data  
3 ALERT type 2 Indicator that the structure model may be wrong or deficient  
5 ALERT type 3 Indicator that the structure quality may be low  
12 ALERT type 4 Improvement, methodology, query or suggestion  
1 ALERT type 5 Informative message, check
-

It is advisable to attempt to resolve as many as possible of the alerts in all categories. Often the minor alerts point to easily fixed oversights, errors and omissions in your CIF or refinement strategy, so attention to these fine details can be worthwhile. In order to resolve some of the more serious problems it may be necessary to carry out additional measurements or structure refinements. However, the purpose of your study may justify the reported deviations and the more serious of these should normally be commented upon in the discussion or experimental section of a paper or in the "special\_details" fields of the CIF. checkCIF was carefully designed to identify outliers and unusual parameters, but every test has its limitations and alerts that are not important in a particular case may appear. Conversely, the absence of alerts does not guarantee there are no aspects of the results needing attention. It is up to the individual to critically assess their own results and, if necessary, seek expert advice.

### **Publication of your CIF in IUCr journals**

A basic structural check has been run on your CIF. These basic checks will be run on all CIFs submitted for publication in IUCr journals (*Acta Crystallographica*, *Journal of Applied Crystallography*, *Journal of Synchrotron Radiation*); however, if you intend to submit to *Acta Crystallographica Section C* or *E* or *IUCrData*, you should make sure that full publication checks are run on the final version of your CIF prior to submission.

### **Publication of your CIF in other journals**

Please refer to the *Notes for Authors* of the relevant journal for any special instructions relating to CIF submission.

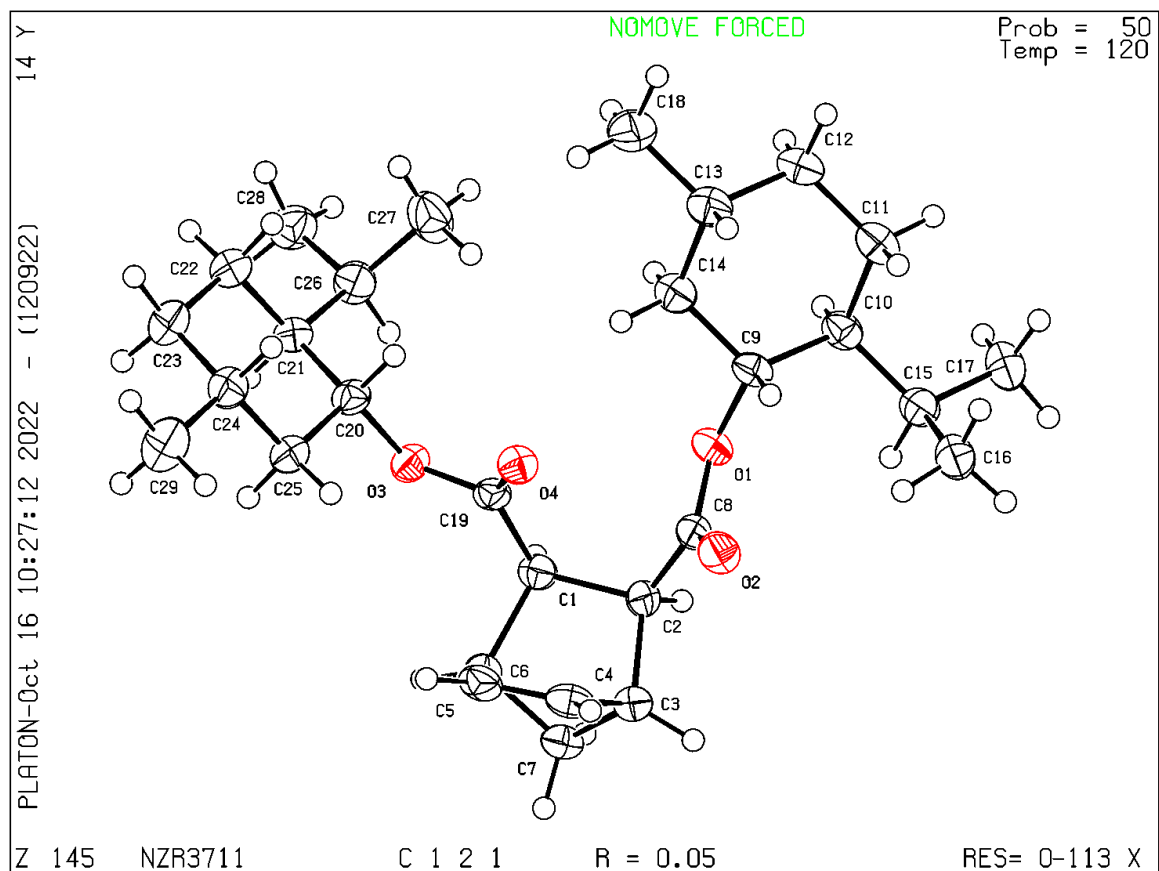

Supplement: Supplementary file 1 [file polymers-14-05453-s001.zip › checkcif_NZR3711.pdf]
