# Supplementary material for: Chiral Polymers from Norbornenes Based on Renewable Chemical Feedstocks
Source: Polymers (Basel). 2022 Dec 13;14(24):5453. doi: 10.3390/polym14245453 (PMC9786787; doi:10.3390/polym14245453)
Supplement: Supplementary file 1 [file polymers-14-05453-s001.zip]

Archive with 7 entries (7 files):
- checkcif_NZR156.pdf
- checkcif_NZR3711.pdf
- NZR156.cif
- NZR156_H_telp50.tif
- NZR3711.cif
- NZR3711_h_var1_telp50.tif
- polymers-2047226-supplementary.pdf
