# Supplementary material for: Chiral Polymers from Norbornenes Based on Renewable Chemical Feedstocks
Source: Polymers (Basel). 2022 Dec 13;14(24):5453. doi: 10.3390/polym14245453 (PMC9786787; doi:10.3390/polym14245453)
Supplement: Supplementary file 1 [file polymers-14-05453-s001.zip › NZR156.cif]

data_NZR156
_audit_creation_date               2022-10-16
_audit_creation_method
;
Olex2 1.3
(compiled 2020.11.12 svn.r5f609507 for OlexSys, GUI svn.r6408)
;
_shelxl_version_number             2014/6
_audit_contact_author_address      ?
_audit_contact_author_email        ?
_audit_contact_author_name         ''
_audit_contact_author_phone        ?
_publ_contact_author_id_orcid      ?
_publ_section_references
;
Dolomanov, O.V., Bourhis, L.J., Gildea, R.J, Howard, J.A.K. & Puschmann, H.
 (2009), J. Appl. Cryst. 42, 339-341.

Sheldrick, G.M. (2008). Acta Cryst. A64, 112-122.

Sheldrick, G.M. (2015). Acta Cryst. A71, 3-8.
;
_chemical_name_common              ?
_chemical_name_systematic          ?
_chemical_formula_moiety           'C29 H46 O4'
_chemical_formula_sum              'C29 H46 O4'
_chemical_formula_weight           458.66
_chemical_absolute_configuration   rm
_chemical_melting_point            ?
loop_
  _atom_type_symbol
  _atom_type_description
  _atom_type_scat_dispersion_real
  _atom_type_scat_dispersion_imag
  _atom_type_scat_source
 'C' 'C' 0.0030 0.0020 'International Tables Vol C Tables 4.2.6.8 and 6.1.1.4'
 'H' 'H' 0.0000 0.0000 'International Tables Vol C Tables 4.2.6.8 and 6.1.1.4'
 'O' 'O' 0.0110 0.0060 'International Tables Vol C Tables 4.2.6.8 and 6.1.1.4'

_shelx_space_group_comment
;
The symmetry employed for this shelxl refinement is uniquely defined
by the following loop, which should always be used as a source of
symmetry information in preference to the above space-group names.
They are only intended as comments.
;
_space_group_crystal_system        'orthorhombic'
_space_group_IT_number             19
_space_group_name_H-M_alt          'P 21 21 21'
_space_group_name_Hall             'P 2ac 2ab'
loop_
  _space_group_symop_operation_xyz
 'x, y, z'
 '-x+1/2, -y, z+1/2'
 'x+1/2, -y+1/2, -z'
 '-x, y+1/2, -z+1/2'

_cell_length_a                     6.0929(10)
_cell_length_b                     36.257(3)
_cell_length_c                     12.0966(14)
_cell_angle_alpha                  90
_cell_angle_beta                   90
_cell_angle_gamma                  90
_cell_volume                       2672.3(6)
_cell_formula_units_Z              4
_cell_measurement_reflns_used      2098
_cell_measurement_temperature      100
_cell_measurement_theta_max        30.55
_cell_measurement_theta_min        2.38
_shelx_estimated_absorpt_T_max     0.999
_shelx_estimated_absorpt_T_min     0.978
_exptl_absorpt_coefficient_mu      0.074
_exptl_absorpt_correction_T_max    0.7461
_exptl_absorpt_correction_T_min    0.4869
_exptl_absorpt_correction_type     multi-scan
_exptl_absorpt_process_details
;
SADABS-2016/2 (Bruker,2016/2) was used for absorption correction.
wR2(int) was 0.1435 before and 0.0790 after correction.
The Ratio of minimum to maximum transmission is 0.6526.
The \l/2 correction factor is Not present.
;
_exptl_absorpt_special_details     ?
_exptl_crystal_colour              colourless
_exptl_crystal_colour_primary      colourless
_exptl_crystal_density_diffrn      1.140
_exptl_crystal_density_meas        .
_exptl_crystal_density_method      ?
_exptl_crystal_description         needle
_exptl_crystal_F_000               1008
_exptl_crystal_size_max            0.3
_exptl_crystal_size_mid            0.01
_exptl_crystal_size_min            0.01
_exptl_transmission_factor_max     ?
_exptl_transmission_factor_min     ?
_diffrn_reflns_av_R_equivalents    0.1657
_diffrn_reflns_av_unetI/netI       0.2086
_diffrn_reflns_Laue_measured_fraction_full  0.964
_diffrn_reflns_Laue_measured_fraction_max  0.991
_diffrn_reflns_limit_h_max         7
_diffrn_reflns_limit_h_min         -6
_diffrn_reflns_limit_k_max         43
_diffrn_reflns_limit_k_min         -40
_diffrn_reflns_limit_l_max         14
_diffrn_reflns_limit_l_min         -14
_diffrn_reflns_number              22808
_diffrn_reflns_point_group_measured_fraction_full  0.963
_diffrn_reflns_point_group_measured_fraction_max  0.991
_diffrn_reflns_theta_full          25.242
_diffrn_reflns_theta_max           24.998
_diffrn_reflns_theta_min           2.024
_diffrn_ambient_temperature        100
_diffrn_detector_area_resol_mean   ?
_diffrn_measured_fraction_theta_full  0.964
_diffrn_measured_fraction_theta_max  0.991
_diffrn_measurement_device_type    'Bruker Quest D8'
_diffrn_measurement_method         '\f and \w scans'
_diffrn_radiation_monochromator    'graphite'
_diffrn_radiation_type             MoK\a
_diffrn_radiation_wavelength       0.71073
_diffrn_source                     ?
_diffrn_source_current             1.4
_diffrn_source_power               0.07
_diffrn_source_voltage             50.0
_diffrn_standards_number           0
_reflns_Friedel_coverage           0.715
_reflns_Friedel_fraction_full      0.962
_reflns_Friedel_fraction_max       0.992
_reflns_number_gt                  3526
_reflns_number_total               4665
_reflns_special_details
;
 Reflections were merged by SHELXL according to the crystal
 class for the calculation of statistics and refinement.
 
 _reflns_Friedel_fraction is defined as the number of unique
 Friedel pairs measured divided by the number that would be
 possible theoretically, ignoring centric projections and
 systematic absences.
;
_reflns_threshold_expression       'I > 2\s(I)'
_computing_cell_refinement         ?
_computing_data_collection         ?
_computing_data_reduction          ?
_computing_molecular_graphics      'Olex2 1.3 (Dolomanov et al., 2009)'
_computing_publication_material    'Olex2 1.3 (Dolomanov et al., 2009)'
_computing_structure_refinement    'XL  (Sheldrick, 2008)'
_computing_structure_solution      'SHELXT 2014/4 (Sheldrick, 2014)'
_refine_diff_density_max           0.371
_refine_diff_density_min           -0.291
_refine_diff_density_rms           0.083
_refine_ls_abs_structure_details
;
 Flack x determined using 1072 quotients [(I+)-(I-)]/[(I+)+(I-)]
 (Parsons, Flack and Wagner, Acta Cryst. B69 (2013) 249-259).
;
_refine_ls_abs_structure_Flack     0.0(10)
_refine_ls_extinction_coef         0.031(6)
_refine_ls_extinction_expression  
 'Fc^*^=kFc[1+0.001xFc^2^\l^3^/sin(2\q)]^-1/4^'
_refine_ls_extinction_method       SHELXL
_refine_ls_goodness_of_fit_ref     1.003
_refine_ls_hydrogen_treatment      constr
_refine_ls_matrix_type             full
_refine_ls_number_parameters       305
_refine_ls_number_reflns           4665
_refine_ls_number_restraints       0
_refine_ls_R_factor_all            0.1225
_refine_ls_R_factor_gt             0.0926
_refine_ls_restrained_S_all        1.003
_refine_ls_shift/su_max            0.000
_refine_ls_shift/su_mean           0.000
_refine_ls_structure_factor_coef   Fsqd
_refine_ls_weighting_details       'w=1/[\s^2^(Fo^2^)] where P=(Fo^2^+2Fc^2^)/3'
_refine_ls_weighting_scheme        calc
_refine_ls_wR_factor_gt            0.2011
_refine_ls_wR_factor_ref           0.2202
_refine_special_details            ?
_olex2_refinement_description
;
1. Fixed Uiso
 At 1.2 times of:
  All C(H) groups, All C(H,H) groups
 At 1.5 times of:
  All C(H,H,H) groups
2.a Ternary CH refined with riding coordinates:
 C1(H1), C2(H2), C3(H3), C6(H6), C9(H9), C10(H10), C13(H13), C15(H15),
 C20(H20), C21(H21), C24(H24), C26(H26)
2.b Secondary CH2 refined with riding coordinates:
 C7(H7A,H7B), C11(H11A,H11B), C12(H12A,H12B), C14(H14A,H14B), C22(H22A,H22B),
 C23(H23A,H23B), C25(H25A,H25B)
2.c Aromatic/amide H refined with riding coordinates:
 C4(H4), C5(H5)
2.d Idealised Me refined as rotating group:
 C16(H16A,H16B,H16C), C17(H17A,H17B,H17C), C18(H18A,H18B,H18C), C27(H27A,H27B,
 H27C), C28(H28A,H28B,H28C), C29(H29A,H29B,H29C)
;
_atom_sites_solution_hydrogens     geom
_atom_sites_solution_primary       dual
_atom_sites_solution_secondary     ?
loop_
  _atom_site_label
  _atom_site_type_symbol
  _atom_site_fract_x
  _atom_site_fract_y
  _atom_site_fract_z
  _atom_site_U_iso_or_equiv
  _atom_site_adp_type
  _atom_site_occupancy
  _atom_site_site_symmetry_order
  _atom_site_calc_flag
  _atom_site_refinement_flags_posn
  _atom_site_refinement_flags_adp
  _atom_site_refinement_flags_occupancy
  _atom_site_disorder_assembly
  _atom_site_disorder_group
 O1 O 0.8335(7) 0.68593(13) 0.8074(3) 0.0193(10) Uani 1 1 d . . . . .
 O2 O 0.9643(7) 0.66981(13) 0.9759(3) 0.0246(11) Uani 1 1 d . . . . .
 O3 O 0.7815(7) 0.58515(13) 0.6647(3) 0.0227(11) Uani 1 1 d . . . . .
 O4 O 1.0085(7) 0.60973(12) 0.7912(3) 0.0208(10) Uani 1 1 d . . . . .
 C1 C 0.6195(10) 0.60877(17) 0.8270(4) 0.0180(13) Uani 1 1 d . . . . .
 H1 H 0.4893 0.6106 0.7770 0.022 Uiso 1 1 calc R U . . .
 C2 C 0.6278(10) 0.64262(17) 0.9084(4) 0.0181(13) Uani 1 1 d . . . . .
 H2 H 0.4956 0.6583 0.8950 0.022 Uiso 1 1 calc R U . . .
 C3 C 0.6033(10) 0.62379(19) 1.0241(5) 0.0216(14) Uani 1 1 d . . . . .
 H3 H 0.6471 0.6392 1.0891 0.026 Uiso 1 1 calc R U . . .
 C4 C 0.3717(11) 0.6087(2) 1.0266(4) 0.0242(15) Uani 1 1 d . . . . .
 H4 H 0.2528 0.6181 1.0690 0.029 Uiso 1 1 calc R U . . .
 C5 C 0.3655(10) 0.58018(19) 0.9589(4) 0.0228(14) Uani 1 1 d . . . . .
 H5 H 0.2412 0.5652 0.9439 0.027 Uiso 1 1 calc R U . . .
 C6 C 0.5916(11) 0.57567(19) 0.9095(5) 0.0231(15) Uani 1 1 d . . . . .
 H6 H 0.6264 0.5507 0.8791 0.028 Uiso 1 1 calc R U . . .
 C7 C 0.7354(11) 0.58863(19) 1.0067(5) 0.0233(15) Uani 1 1 d . . . . .
 H7A H 0.7299 0.5717 1.0709 0.028 Uiso 1 1 calc R U . . .
 H7B H 0.8895 0.5934 0.9850 0.028 Uiso 1 1 calc R U . . .
 C8 C 0.8298(10) 0.66682(18) 0.9027(4) 0.0183(13) Uani 1 1 d . . . . .
 C9 C 1.0315(10) 0.70797(19) 0.7821(4) 0.0196(14) Uani 1 1 d . . . . .
 H9 H 1.1217 0.7108 0.8507 0.024 Uiso 1 1 calc R U . . .
 C10 C 0.9597(9) 0.74564(18) 0.7421(4) 0.0183(14) Uani 1 1 d . . . . .
 H10 H 0.8677 0.7418 0.6746 0.022 Uiso 1 1 calc R U . . .
 C11 C 1.1676(11) 0.76684(19) 0.7059(5) 0.0243(15) Uani 1 1 d . . . . .
 H11A H 1.1241 0.7910 0.6744 0.029 Uiso 1 1 calc R U . . .
 H11B H 1.2606 0.7716 0.7715 0.029 Uiso 1 1 calc R U . . .
 C12 C 1.3018(11) 0.74532(19) 0.6196(5) 0.0243(15) Uani 1 1 d . . . . .
 H12A H 1.2146 0.7430 0.5509 0.029 Uiso 1 1 calc R U . . .
 H12B H 1.4367 0.7593 0.6018 0.029 Uiso 1 1 calc R U . . .
 C13 C 1.3642(10) 0.7076(2) 0.6596(4) 0.0229(15) Uani 1 1 d . . . . .
 H13 H 1.4610 0.7107 0.7257 0.027 Uiso 1 1 calc R U . . .
 C14 C 1.1611(10) 0.68657(19) 0.6965(5) 0.0217(14) Uani 1 1 d . . . . .
 H14A H 1.0666 0.6817 0.6316 0.026 Uiso 1 1 calc R U . . .
 H14B H 1.2058 0.6625 0.7281 0.026 Uiso 1 1 calc R U . . .
 C15 C 0.8200(11) 0.76697(18) 0.8257(4) 0.0228(14) Uani 1 1 d . . . . .
 H15 H 0.6857 0.7519 0.8402 0.027 Uiso 1 1 calc R U . . .
 C16 C 0.9331(11) 0.7734(2) 0.9380(5) 0.0248(15) Uani 1 1 d . . . . .
 H16A H 1.0669 0.7880 0.9269 0.037 Uiso 1 1 calc R U . . .
 H16B H 0.9710 0.7496 0.9712 0.037 Uiso 1 1 calc R U . . .
 H16C H 0.8332 0.7868 0.9872 0.037 Uiso 1 1 calc R U . . .
 C17 C 0.7429(11) 0.80399(19) 0.7789(5) 0.0255(15) Uani 1 1 d . . . . .
 H17A H 0.8679 0.8209 0.7741 0.038 Uiso 1 1 calc R U . . .
 H17B H 0.6307 0.8145 0.8276 0.038 Uiso 1 1 calc R U . . .
 H17C H 0.6808 0.8002 0.7050 0.038 Uiso 1 1 calc R U . . .
 C18 C 1.4924(11) 0.6853(2) 0.5734(5) 0.0258(15) Uani 1 1 d . . . . .
 H18A H 1.4057 0.6833 0.5054 0.039 Uiso 1 1 calc R U . . .
 H18B H 1.5219 0.6605 0.6024 0.039 Uiso 1 1 calc R U . . .
 H18C H 1.6317 0.6977 0.5574 0.039 Uiso 1 1 calc R U . . .
 C19 C 0.8246(10) 0.60282(18) 0.7614(4) 0.0184(14) Uani 1 1 d . . . . .
 C20 C 0.9749(10) 0.57465(19) 0.6001(5) 0.0218(14) Uani 1 1 d . . . . .
 H20 H 1.0803 0.5958 0.5991 0.026 Uiso 1 1 calc R U . . .
 C21 C 0.8953(11) 0.56733(19) 0.4816(4) 0.0237(15) Uani 1 1 d . . . . .
 H21 H 0.7934 0.5457 0.4845 0.028 Uiso 1 1 calc R U . . .
 C22 C 1.0970(12) 0.5556(2) 0.4140(5) 0.0281(16) Uani 1 1 d . . . . .
 H22A H 1.0504 0.5497 0.3376 0.034 Uiso 1 1 calc R U . . .
 H22B H 1.2015 0.5764 0.4101 0.034 Uiso 1 1 calc R U . . .
 C23 C 1.2126(12) 0.5223(2) 0.4630(5) 0.0299(16) Uani 1 1 d . . . . .
 H23A H 1.3413 0.5160 0.4169 0.036 Uiso 1 1 calc R U . . .
 H23B H 1.1115 0.5010 0.4630 0.036 Uiso 1 1 calc R U . . .
 C24 C 1.2878(11) 0.53016(19) 0.5810(5) 0.0253(15) Uani 1 1 d . . . . .
 H24 H 1.3917 0.5515 0.5790 0.030 Uiso 1 1 calc R U . . .
 C25 C 1.0877(11) 0.5413(2) 0.6499(5) 0.0249(15) Uani 1 1 d . . . . .
 H25A H 0.9830 0.5205 0.6533 0.030 Uiso 1 1 calc R U . . .
 H25B H 1.1348 0.5472 0.7262 0.030 Uiso 1 1 calc R U . . .
 C26 C 0.7682(12) 0.5996(2) 0.4301(5) 0.0281(16) Uani 1 1 d . . . . .
 H26 H 0.6457 0.6058 0.4820 0.034 Uiso 1 1 calc R U . . .
 C27 C 0.9036(12) 0.6345(2) 0.4150(5) 0.0324(17) Uani 1 1 d . . . . .
 H27A H 0.9795 0.6404 0.4843 0.049 Uiso 1 1 calc R U . . .
 H27B H 0.8066 0.6550 0.3948 0.049 Uiso 1 1 calc R U . . .
 H27C H 1.0119 0.6307 0.3563 0.049 Uiso 1 1 calc R U . . .
 C28 C 0.6625(13) 0.5886(3) 0.3189(5) 0.041(2) Uani 1 1 d . . . . .
 H28A H 0.7759 0.5875 0.2616 0.061 Uiso 1 1 calc R U . . .
 H28B H 0.5518 0.6070 0.2983 0.061 Uiso 1 1 calc R U . . .
 H28C H 0.5927 0.5644 0.3262 0.061 Uiso 1 1 calc R U . . .
 C29 C 1.4054(12) 0.4977(2) 0.6336(5) 0.0357(18) Uani 1 1 d . . . . .
 H29A H 1.3061 0.4764 0.6364 0.054 Uiso 1 1 calc R U . . .
 H29B H 1.4507 0.5042 0.7088 0.054 Uiso 1 1 calc R U . . .
 H29C H 1.5351 0.4914 0.5896 0.054 Uiso 1 1 calc R U . . .

loop_
  _atom_site_aniso_label
  _atom_site_aniso_U_11
  _atom_site_aniso_U_22
  _atom_site_aniso_U_33
  _atom_site_aniso_U_23
  _atom_site_aniso_U_13
  _atom_site_aniso_U_12
 O1 0.014(2) 0.030(3) 0.0133(18) 0.0032(17) -0.0007(16) -0.004(2)
 O2 0.026(3) 0.029(3) 0.019(2) 0.0022(19) -0.0040(18) 0.000(2)
 O3 0.024(3) 0.031(3) 0.0128(19) -0.0021(18) 0.0026(16) 0.001(2)
 O4 0.021(2) 0.025(3) 0.0159(19) 0.0016(17) -0.0001(18) 0.002(2)
 C1 0.022(3) 0.020(3) 0.012(3) -0.001(2) 0.001(2) 0.000(3)
 C2 0.020(3) 0.021(3) 0.013(3) -0.004(2) 0.001(2) -0.001(3)
 C3 0.016(3) 0.034(4) 0.015(3) -0.002(3) 0.001(2) 0.008(3)
 C4 0.023(3) 0.036(4) 0.013(3) 0.005(3) 0.005(2) -0.001(3)
 C5 0.020(3) 0.029(4) 0.020(3) 0.009(3) 0.000(2) 0.000(3)
 C6 0.029(4) 0.023(4) 0.017(3) 0.002(3) 0.002(3) -0.004(3)
 C7 0.022(4) 0.031(4) 0.017(3) 0.006(3) 0.004(2) 0.000(3)
 C8 0.017(3) 0.024(3) 0.014(3) -0.003(2) 0.002(2) -0.001(3)
 C9 0.012(3) 0.031(4) 0.015(3) -0.001(3) 0.000(2) -0.008(3)
 C10 0.012(3) 0.030(4) 0.012(3) -0.001(2) -0.002(2) -0.005(3)
 C11 0.024(4) 0.027(4) 0.022(3) 0.003(3) 0.006(3) -0.005(3)
 C12 0.021(3) 0.033(4) 0.019(3) -0.002(3) 0.003(2) -0.004(3)
 C13 0.015(3) 0.040(4) 0.014(3) -0.003(3) -0.003(2) 0.001(3)
 C14 0.020(3) 0.025(4) 0.020(3) -0.001(3) 0.001(2) 0.002(3)
 C15 0.022(4) 0.027(4) 0.019(3) -0.005(3) -0.003(2) 0.004(3)
 C16 0.029(4) 0.030(4) 0.015(3) -0.005(3) 0.001(2) -0.001(3)
 C17 0.023(4) 0.027(4) 0.026(3) 0.000(3) 0.001(3) 0.001(3)
 C18 0.021(4) 0.030(4) 0.026(3) 0.001(3) 0.006(3) 0.004(3)
 C19 0.022(3) 0.026(4) 0.007(2) 0.004(2) -0.001(2) 0.006(3)
 C20 0.018(3) 0.030(4) 0.018(3) -0.005(3) 0.004(2) 0.003(3)
 C21 0.028(4) 0.029(4) 0.015(3) -0.005(3) 0.003(3) -0.002(3)
 C22 0.041(4) 0.026(4) 0.018(3) -0.006(3) 0.007(3) 0.004(3)
 C23 0.036(4) 0.030(4) 0.024(3) -0.001(3) 0.006(3) 0.007(3)
 C24 0.024(4) 0.021(4) 0.030(3) 0.001(3) 0.001(3) 0.004(3)
 C25 0.025(4) 0.033(4) 0.017(3) 0.001(3) -0.002(2) -0.004(3)
 C26 0.038(4) 0.031(4) 0.015(3) 0.000(3) 0.000(3) 0.005(3)
 C27 0.043(5) 0.025(4) 0.029(3) 0.002(3) 0.002(3) 0.003(3)
 C28 0.033(4) 0.072(6) 0.018(3) -0.002(3) 0.000(3) 0.001(4)
 C29 0.034(4) 0.041(5) 0.032(4) -0.001(3) -0.002(3) 0.009(4)

_geom_special_details
;
 All esds (except the esd in the dihedral angle between two l.s. planes)
 are estimated using the full covariance matrix.  The cell esds are taken
 into account individually in the estimation of esds in distances, angles
 and torsion angles; correlations between esds in cell parameters are only
 used when they are defined by crystal symmetry.  An approximate (isotropic)
 treatment of cell esds is used for estimating esds involving l.s. planes.
;
loop_
  _geom_bond_atom_site_label_1
  _geom_bond_atom_site_label_2
  _geom_bond_distance
  _geom_bond_site_symmetry_2
  _geom_bond_publ_flag
 O1 C8 1.345(7) . ?
 O1 C9 1.479(7) . ?
 O2 C8 1.212(7) . ?
 O3 C19 1.359(7) . ?
 O3 C20 1.465(7) . ?
 O4 C19 1.203(7) . ?
 C1 H1 1.0000 . ?
 C1 C2 1.574(8) . ?
 C1 C6 1.570(8) . ?
 C1 C19 1.496(8) . ?
 C2 H2 1.0000 . ?
 C2 C3 1.565(8) . ?
 C2 C8 1.513(8) . ?
 C3 H3 1.0000 . ?
 C3 C4 1.513(9) . ?
 C3 C7 1.522(9) . ?
 C4 H4 0.9500 . ?
 C4 C5 1.321(10) . ?
 C5 H5 0.9500 . ?
 C5 C6 1.510(9) . ?
 C6 H6 1.0000 . ?
 C6 C7 1.540(8) . ?
 C7 H7A 0.9900 . ?
 C7 H7B 0.9900 . ?
 C9 H9 1.0000 . ?
 C9 C10 1.514(9) . ?
 C9 C14 1.516(8) . ?
 C10 H10 1.0000 . ?
 C10 C11 1.545(8) . ?
 C10 C15 1.531(8) . ?
 C11 H11A 0.9900 . ?
 C11 H11B 0.9900 . ?
 C11 C12 1.539(8) . ?
 C12 H12A 0.9900 . ?
 C12 H12B 0.9900 . ?
 C12 C13 1.501(10) . ?
 C13 H13 1.0000 . ?
 C13 C14 1.520(9) . ?
 C13 C18 1.534(8) . ?
 C14 H14A 0.9900 . ?
 C14 H14B 0.9900 . ?
 C15 H15 1.0000 . ?
 C15 C16 1.541(8) . ?
 C15 C17 1.531(9) . ?
 C16 H16A 0.9800 . ?
 C16 H16B 0.9800 . ?
 C16 H16C 0.9800 . ?
 C17 H17A 0.9800 . ?
 C17 H17B 0.9800 . ?
 C17 H17C 0.9800 . ?
 C18 H18A 0.9800 . ?
 C18 H18B 0.9800 . ?
 C18 H18C 0.9800 . ?
 C20 H20 1.0000 . ?
 C20 C21 1.536(8) . ?
 C20 C25 1.514(9) . ?
 C21 H21 1.0000 . ?
 C21 C22 1.537(8) . ?
 C21 C26 1.534(9) . ?
 C22 H22A 0.9900 . ?
 C22 H22B 0.9900 . ?
 C22 C23 1.516(10) . ?
 C23 H23A 0.9900 . ?
 C23 H23B 0.9900 . ?
 C23 C24 1.525(9) . ?
 C24 H24 1.0000 . ?
 C24 C25 1.532(8) . ?
 C24 C29 1.519(9) . ?
 C25 H25A 0.9900 . ?
 C25 H25B 0.9900 . ?
 C26 H26 1.0000 . ?
 C26 C27 1.523(10) . ?
 C26 C28 1.544(8) . ?
 C27 H27A 0.9800 . ?
 C27 H27B 0.9800 . ?
 C27 H27C 0.9800 . ?
 C28 H28A 0.9800 . ?
 C28 H28B 0.9800 . ?
 C28 H28C 0.9800 . ?
 C29 H29A 0.9800 . ?
 C29 H29B 0.9800 . ?
 C29 H29C 0.9800 . ?

loop_
  _geom_angle_atom_site_label_1
  _geom_angle_atom_site_label_2
  _geom_angle_atom_site_label_3
  _geom_angle
  _geom_angle_site_symmetry_1
  _geom_angle_site_symmetry_3
  _geom_angle_publ_flag
 C8 O1 C9 118.0(4) . . ?
 C19 O3 C20 115.2(5) . . ?
 C2 C1 H1 110.6 . . ?
 C6 C1 H1 110.6 . . ?
 C6 C1 C2 101.7(4) . . ?
 C19 C1 H1 110.6 . . ?
 C19 C1 C2 114.7(5) . . ?
 C19 C1 C6 108.5(5) . . ?
 C1 C2 H2 108.5 . . ?
 C3 C2 C1 102.5(5) . . ?
 C3 C2 H2 108.5 . . ?
 C8 C2 C1 116.7(5) . . ?
 C8 C2 H2 108.5 . . ?
 C8 C2 C3 111.8(5) . . ?
 C2 C3 H3 115.8 . . ?
 C4 C3 C2 105.3(5) . . ?
 C4 C3 H3 115.8 . . ?
 C4 C3 C7 101.2(5) . . ?
 C7 C3 C2 101.0(5) . . ?
 C7 C3 H3 115.8 . . ?
 C3 C4 H4 126.4 . . ?
 C5 C4 C3 107.3(6) . . ?
 C5 C4 H4 126.4 . . ?
 C4 C5 H5 126.2 . . ?
 C4 C5 C6 107.7(6) . . ?
 C6 C5 H5 126.2 . . ?
 C1 C6 H6 115.9 . . ?
 C5 C6 C1 105.5(5) . . ?
 C5 C6 H6 115.9 . . ?
 C5 C6 C7 100.6(5) . . ?
 C7 C6 C1 101.0(5) . . ?
 C7 C6 H6 115.9 . . ?
 C3 C7 C6 93.5(5) . . ?
 C3 C7 H7A 113.0 . . ?
 C3 C7 H7B 113.0 . . ?
 C6 C7 H7A 113.0 . . ?
 C6 C7 H7B 113.0 . . ?
 H7A C7 H7B 110.4 . . ?
 O1 C8 C2 110.6(5) . . ?
 O2 C8 O1 124.7(6) . . ?
 O2 C8 C2 124.7(5) . . ?
 O1 C9 H9 109.4 . . ?
 O1 C9 C10 108.6(5) . . ?
 O1 C9 C14 106.8(5) . . ?
 C10 C9 H9 109.4 . . ?
 C10 C9 C14 113.2(5) . . ?
 C14 C9 H9 109.4 . . ?
 C9 C10 H10 107.3 . . ?
 C9 C10 C11 107.6(5) . . ?
 C9 C10 C15 113.9(5) . . ?
 C11 C10 H10 107.3 . . ?
 C15 C10 H10 107.3 . . ?
 C15 C10 C11 113.1(5) . . ?
 C10 C11 H11A 109.2 . . ?
 C10 C11 H11B 109.2 . . ?
 H11A C11 H11B 107.9 . . ?
 C12 C11 C10 112.1(5) . . ?
 C12 C11 H11A 109.2 . . ?
 C12 C11 H11B 109.2 . . ?
 C11 C12 H12A 109.2 . . ?
 C11 C12 H12B 109.2 . . ?
 H12A C12 H12B 107.9 . . ?
 C13 C12 C11 112.2(5) . . ?
 C13 C12 H12A 109.2 . . ?
 C13 C12 H12B 109.2 . . ?
 C12 C13 H13 107.6 . . ?
 C12 C13 C14 110.2(5) . . ?
 C12 C13 C18 113.0(5) . . ?
 C14 C13 H13 107.6 . . ?
 C14 C13 C18 110.5(5) . . ?
 C18 C13 H13 107.6 . . ?
 C9 C14 C13 111.6(5) . . ?
 C9 C14 H14A 109.3 . . ?
 C9 C14 H14B 109.3 . . ?
 C13 C14 H14A 109.3 . . ?
 C13 C14 H14B 109.3 . . ?
 H14A C14 H14B 108.0 . . ?
 C10 C15 H15 107.1 . . ?
 C10 C15 C16 114.2(5) . . ?
 C16 C15 H15 107.1 . . ?
 C17 C15 C10 111.7(5) . . ?
 C17 C15 H15 107.1 . . ?
 C17 C15 C16 109.3(5) . . ?
 C15 C16 H16A 109.5 . . ?
 C15 C16 H16B 109.5 . . ?
 C15 C16 H16C 109.5 . . ?
 H16A C16 H16B 109.5 . . ?
 H16A C16 H16C 109.5 . . ?
 H16B C16 H16C 109.5 . . ?
 C15 C17 H17A 109.5 . . ?
 C15 C17 H17B 109.5 . . ?
 C15 C17 H17C 109.5 . . ?
 H17A C17 H17B 109.5 . . ?
 H17A C17 H17C 109.5 . . ?
 H17B C17 H17C 109.5 . . ?
 C13 C18 H18A 109.5 . . ?
 C13 C18 H18B 109.5 . . ?
 C13 C18 H18C 109.5 . . ?
 H18A C18 H18B 109.5 . . ?
 H18A C18 H18C 109.5 . . ?
 H18B C18 H18C 109.5 . . ?
 O3 C19 C1 111.3(5) . . ?
 O4 C19 O3 122.4(5) . . ?
 O4 C19 C1 126.1(5) . . ?
 O3 C20 H20 108.9 . . ?
 O3 C20 C21 106.8(5) . . ?
 O3 C20 C25 111.1(5) . . ?
 C21 C20 H20 108.9 . . ?
 C25 C20 H20 108.9 . . ?
 C25 C20 C21 112.1(5) . . ?
 C20 C21 H21 107.3 . . ?
 C20 C21 C22 107.0(5) . . ?
 C22 C21 H21 107.3 . . ?
 C26 C21 C20 114.0(5) . . ?
 C26 C21 H21 107.3 . . ?
 C26 C21 C22 113.5(5) . . ?
 C21 C22 H22A 109.1 . . ?
 C21 C22 H22B 109.1 . . ?
 H22A C22 H22B 107.8 . . ?
 C23 C22 C21 112.5(5) . . ?
 C23 C22 H22A 109.1 . . ?
 C23 C22 H22B 109.1 . . ?
 C22 C23 H23A 109.4 . . ?
 C22 C23 H23B 109.4 . . ?
 C22 C23 C24 111.0(6) . . ?
 H23A C23 H23B 108.0 . . ?
 C24 C23 H23A 109.4 . . ?
 C24 C23 H23B 109.4 . . ?
 C23 C24 H24 108.2 . . ?
 C23 C24 C25 108.6(5) . . ?
 C25 C24 H24 108.2 . . ?
 C29 C24 C23 112.9(6) . . ?
 C29 C24 H24 108.2 . . ?
 C29 C24 C25 110.7(5) . . ?
 C20 C25 C24 110.9(5) . . ?
 C20 C25 H25A 109.5 . . ?
 C20 C25 H25B 109.5 . . ?
 C24 C25 H25A 109.5 . . ?
 C24 C25 H25B 109.5 . . ?
 H25A C25 H25B 108.1 . . ?
 C21 C26 H26 107.0 . . ?
 C21 C26 C28 111.6(6) . . ?
 C27 C26 C21 114.2(6) . . ?
 C27 C26 H26 107.0 . . ?
 C27 C26 C28 109.6(6) . . ?
 C28 C26 H26 107.0 . . ?
 C26 C27 H27A 109.5 . . ?
 C26 C27 H27B 109.5 . . ?
 C26 C27 H27C 109.5 . . ?
 H27A C27 H27B 109.5 . . ?
 H27A C27 H27C 109.5 . . ?
 H27B C27 H27C 109.5 . . ?
 C26 C28 H28A 109.5 . . ?
 C26 C28 H28B 109.5 . . ?
 C26 C28 H28C 109.5 . . ?
 H28A C28 H28B 109.5 . . ?
 H28A C28 H28C 109.5 . . ?
 H28B C28 H28C 109.5 . . ?
 C24 C29 H29A 109.5 . . ?
 C24 C29 H29B 109.5 . . ?
 C24 C29 H29C 109.5 . . ?
 H29A C29 H29B 109.5 . . ?
 H29A C29 H29C 109.5 . . ?
 H29B C29 H29C 109.5 . . ?

loop_
  _geom_torsion_atom_site_label_1
  _geom_torsion_atom_site_label_2
  _geom_torsion_atom_site_label_3
  _geom_torsion_atom_site_label_4
  _geom_torsion
  _geom_torsion_site_symmetry_1
  _geom_torsion_site_symmetry_2
  _geom_torsion_site_symmetry_3
  _geom_torsion_site_symmetry_4
  _geom_torsion_publ_flag
 O1 C9 C10 C11 -174.8(4) . . . . ?
 O1 C9 C10 C15 59.0(6) . . . . ?
 O1 C9 C14 C13 177.2(4) . . . . ?
 O3 C20 C21 C22 -178.9(5) . . . . ?
 O3 C20 C21 C26 54.7(7) . . . . ?
 O3 C20 C25 C24 179.2(5) . . . . ?
 C1 C2 C3 C4 -67.8(6) . . . . ?
 C1 C2 C3 C7 37.2(6) . . . . ?
 C1 C2 C8 O1 69.5(7) . . . . ?
 C1 C2 C8 O2 -113.5(7) . . . . ?
 C1 C6 C7 C3 58.9(5) . . . . ?
 C2 C1 C6 C5 67.8(6) . . . . ?
 C2 C1 C6 C7 -36.6(6) . . . . ?
 C2 C1 C19 O3 -153.9(5) . . . . ?
 C2 C1 C19 O4 31.6(9) . . . . ?
 C2 C3 C4 C5 71.7(6) . . . . ?
 C2 C3 C7 C6 -58.8(5) . . . . ?
 C3 C2 C8 O1 -172.9(5) . . . . ?
 C3 C2 C8 O2 4.1(9) . . . . ?
 C3 C4 C5 C6 -0.3(7) . . . . ?
 C4 C3 C7 C6 49.4(5) . . . . ?
 C4 C5 C6 C1 -71.6(6) . . . . ?
 C4 C5 C6 C7 33.0(7) . . . . ?
 C5 C6 C7 C3 -49.4(6) . . . . ?
 C6 C1 C2 C3 -0.1(6) . . . . ?
 C6 C1 C2 C8 122.5(6) . . . . ?
 C6 C1 C19 O3 93.3(6) . . . . ?
 C6 C1 C19 O4 -81.2(8) . . . . ?
 C7 C3 C4 C5 -33.1(6) . . . . ?
 C8 O1 C9 C10 -134.3(5) . . . . ?
 C8 O1 C9 C14 103.3(6) . . . . ?
 C8 C2 C3 C4 166.4(5) . . . . ?
 C8 C2 C3 C7 -88.6(6) . . . . ?
 C9 O1 C8 O2 9.6(9) . . . . ?
 C9 O1 C8 C2 -173.4(5) . . . . ?
 C9 C10 C11 C12 54.9(6) . . . . ?
 C9 C10 C15 C16 58.2(7) . . . . ?
 C9 C10 C15 C17 -177.2(5) . . . . ?
 C10 C9 C14 C13 57.7(7) . . . . ?
 C10 C11 C12 C13 -56.0(7) . . . . ?
 C11 C10 C15 C16 -65.1(7) . . . . ?
 C11 C10 C15 C17 59.5(7) . . . . ?
 C11 C12 C13 C14 54.2(7) . . . . ?
 C11 C12 C13 C18 178.4(5) . . . . ?
 C12 C13 C14 C9 -54.6(6) . . . . ?
 C14 C9 C10 C11 -56.3(6) . . . . ?
 C14 C9 C10 C15 177.5(5) . . . . ?
 C15 C10 C11 C12 -178.4(5) . . . . ?
 C18 C13 C14 C9 179.8(5) . . . . ?
 C19 O3 C20 C21 -161.7(5) . . . . ?
 C19 O3 C20 C25 75.7(7) . . . . ?
 C19 C1 C2 C3 -116.9(5) . . . . ?
 C19 C1 C2 C8 5.7(7) . . . . ?
 C19 C1 C6 C5 -171.0(5) . . . . ?
 C19 C1 C6 C7 84.7(6) . . . . ?
 C20 O3 C19 O4 0.9(8) . . . . ?
 C20 O3 C19 C1 -173.9(5) . . . . ?
 C20 C21 C22 C23 56.5(7) . . . . ?
 C20 C21 C26 C27 63.7(7) . . . . ?
 C20 C21 C26 C28 -171.3(6) . . . . ?
 C21 C20 C25 C24 59.7(7) . . . . ?
 C21 C22 C23 C24 -58.8(8) . . . . ?
 C22 C21 C26 C27 -59.1(7) . . . . ?
 C22 C21 C26 C28 65.9(8) . . . . ?
 C22 C23 C24 C25 57.0(8) . . . . ?
 C22 C23 C24 C29 -179.8(6) . . . . ?
 C23 C24 C25 C20 -57.6(7) . . . . ?
 C25 C20 C21 C22 -57.0(7) . . . . ?
 C25 C20 C21 C26 176.7(6) . . . . ?
 C26 C21 C22 C23 -176.8(6) . . . . ?
 C29 C24 C25 C20 177.9(6) . . . . ?

_shelx_res_file
;
TITL a P212121
CELL 0.71073 6.0929 36.257 12.0966 90 90 90
ZERR 4 0.001 0.003 0.0014 0 0 0
LATT -1
SYMM 0.5-X,-Y,0.5+Z
SYMM 0.5+X,0.5-Y,-Z
SYMM -X,0.5+Y,0.5-Z
SFAC  C 2.310 20.844 1.02 10.208 1.589 0.569 0.865 51.651 0.216 0.003 0.002 =
 11.5 0.68 12.01
SFAC H
SFAC  O 3.049 13.277 2.287 5.701 1.546 0.324 0.867 32.909 0.251 0.011 0.006 =
 32.5 0.68 16
UNIT 116 184 16

L.S. 10 0 0
PLAN  7
SIZE 0.01 0.01 0.3
TEMP -173.15
CONF
MORE -1
BOND $H
fmap 2 53
acta
OMIT -4 50
OMIT 0 1 1
REM <olex2.extras>
REM <HklSrc "%.\\a.hkl">
REM </olex2.extras>

WGHT    0.000000
EXTI    0.031351
FVAR       0.48751
O1    3    0.833546    0.685928    0.807383    11.00000    0.01449    0.03014 =
         0.01330    0.00322   -0.00074   -0.00375
O2    3    0.964345    0.669808    0.975916    11.00000    0.02557    0.02900 =
         0.01910    0.00217   -0.00403    0.00015
O3    3    0.781453    0.585145    0.664715    11.00000    0.02421    0.03116 =
         0.01278   -0.00207    0.00262    0.00127
O4    3    1.008534    0.609733    0.791152    11.00000    0.02095    0.02549 =
         0.01587    0.00156   -0.00010    0.00157
C1    1    0.619494    0.608767    0.827013    11.00000    0.02188    0.01999 =
         0.01227   -0.00133    0.00105    0.00024
AFIX  13
H1    2    0.489346    0.610645    0.776963    11.00000   -1.20000
AFIX   0
C2    1    0.627808    0.642615    0.908394    11.00000    0.01990    0.02150 =
         0.01285   -0.00375    0.00121   -0.00128
AFIX  13
H2    2    0.495611    0.658336    0.894979    11.00000   -1.20000
AFIX   0
C3    1    0.603301    0.623787    1.024136    11.00000    0.01634    0.03383 =
         0.01453   -0.00160    0.00133    0.00803
AFIX  13
H3    2    0.647132    0.639164    1.089114    11.00000   -1.20000
AFIX   0
C4    1    0.371703    0.608730    1.026614    11.00000    0.02332    0.03580 =
         0.01334    0.00483    0.00485   -0.00129
AFIX  43
H4    2    0.252845    0.618078    1.069024    11.00000   -1.20000
AFIX   0
C5    1    0.365490    0.580175    0.958861    11.00000    0.02022    0.02861 =
         0.01960    0.00867   -0.00006    0.00046
AFIX  43
H5    2    0.241174    0.565171    0.943883    11.00000   -1.20000
AFIX   0
C6    1    0.591618    0.575674    0.909489    11.00000    0.02871    0.02332 =
         0.01734    0.00241    0.00156   -0.00445
AFIX  13
H6    2    0.626374    0.550692    0.879145    11.00000   -1.20000
AFIX   0
C7    1    0.735444    0.588634    1.006683    11.00000    0.02215    0.03119 =
         0.01666    0.00622    0.00382    0.00008
AFIX  23
H7A   2    0.729897    0.571741    1.070920    11.00000   -1.20000
H7B   2    0.889507    0.593432    0.985016    11.00000   -1.20000
AFIX   0
C8    1    0.829772    0.666824    0.902684    11.00000    0.01715    0.02362 =
         0.01402   -0.00332    0.00213   -0.00133
C9    1    1.031463    0.707967    0.782115    11.00000    0.01214    0.03144 =
         0.01523   -0.00099    0.00006   -0.00814
AFIX  13
H9    2    1.121687    0.710773    0.850657    11.00000   -1.20000
AFIX   0
C10   1    0.959698    0.745644    0.742134    11.00000    0.01204    0.03041 =
         0.01236   -0.00085   -0.00208   -0.00525
AFIX  13
H10   2    0.867697    0.741813    0.674645    11.00000   -1.20000
AFIX   0
C11   1    1.167629    0.766842    0.705944    11.00000    0.02426    0.02697 =
         0.02177    0.00291    0.00556   -0.00479
AFIX  23
H11A  2    1.124116    0.790959    0.674445    11.00000   -1.20000
H11B  2    1.260564    0.771613    0.771536    11.00000   -1.20000
AFIX   0
C12   1    1.301818    0.745318    0.619569    11.00000    0.02125    0.03277 =
         0.01887   -0.00224    0.00287   -0.00398
AFIX  23
H12A  2    1.214618    0.742966    0.550873    11.00000   -1.20000
H12B  2    1.436702    0.759335    0.601761    11.00000   -1.20000
AFIX   0
C13   1    1.364152    0.707565    0.659647    11.00000    0.01508    0.04013 =
         0.01352   -0.00265   -0.00302    0.00068
AFIX  13
H13   2    1.460996    0.710721    0.725716    11.00000   -1.20000
AFIX   0
C14   1    1.161109    0.686570    0.696522    11.00000    0.02002    0.02498 =
         0.02010   -0.00102    0.00111    0.00215
AFIX  23
H14A  2    1.066588    0.681676    0.631590    11.00000   -1.20000
H14B  2    1.205800    0.662525    0.728097    11.00000   -1.20000
AFIX   0
C15   1    0.819982    0.766968    0.825688    11.00000    0.02220    0.02715 =
         0.01909   -0.00463   -0.00297    0.00373
AFIX  13
H15   2    0.685715    0.751862    0.840200    11.00000   -1.20000
AFIX   0
C16   1    0.933055    0.773427    0.937995    11.00000    0.02902    0.03009 =
         0.01532   -0.00500    0.00069   -0.00110
AFIX 137
H16A  2    1.066878    0.787961    0.926938    11.00000   -1.50000
H16B  2    0.971008    0.749618    0.971238    11.00000   -1.50000
H16C  2    0.833180    0.786810    0.987226    11.00000   -1.50000
AFIX   0
C17   1    0.742896    0.803993    0.778898    11.00000    0.02310    0.02698 =
         0.02631   -0.00034    0.00066    0.00126
AFIX 137
H17A  2    0.867854    0.820935    0.774076    11.00000   -1.50000
H17B  2    0.630726    0.814526    0.827627    11.00000   -1.50000
H17C  2    0.680754    0.800222    0.705033    11.00000   -1.50000
AFIX   0
C18   1    1.492433    0.685266    0.573422    11.00000    0.02143    0.02957 =
         0.02626    0.00057    0.00622    0.00381
AFIX 137
H18A  2    1.405694    0.683342    0.505442    11.00000   -1.50000
H18B  2    1.521911    0.660510    0.602356    11.00000   -1.50000
H18C  2    1.631657    0.697697    0.557377    11.00000   -1.50000
AFIX   0
C19   1    0.824600    0.602815    0.761407    11.00000    0.02216    0.02615 =
         0.00696    0.00427   -0.00128    0.00589
C20   1    0.974877    0.574645    0.600083    11.00000    0.01784    0.02982 =
         0.01786   -0.00467    0.00419    0.00289
AFIX  13
H20   2    1.080308    0.595780    0.599102    11.00000   -1.20000
AFIX   0
C21   1    0.895262    0.567333    0.481603    11.00000    0.02766    0.02891 =
         0.01453   -0.00459    0.00259   -0.00161
AFIX  13
H21   2    0.793370    0.545733    0.484546    11.00000   -1.20000
AFIX   0
C22   1    1.097032    0.555562    0.413963    11.00000    0.04114    0.02553 =
         0.01767   -0.00645    0.00685    0.00390
AFIX  23
H22A  2    1.050355    0.549654    0.337597    11.00000   -1.20000
H22B  2    1.201509    0.576434    0.410119    11.00000   -1.20000
AFIX   0
C23   1    1.212584    0.522348    0.463045    11.00000    0.03583    0.03038 =
         0.02358   -0.00150    0.00592    0.00675
AFIX  23
H23A  2    1.341289    0.515964    0.416901    11.00000   -1.20000
H23B  2    1.111488    0.500972    0.463015    11.00000   -1.20000
AFIX   0
C24   1    1.287819    0.530158    0.580973    11.00000    0.02433    0.02110 =
         0.03039    0.00072    0.00111    0.00418
AFIX  13
H24   2    1.391710    0.551500    0.579015    11.00000   -1.20000
AFIX   0
C25   1    1.087701    0.541349    0.649872    11.00000    0.02479    0.03325 =
         0.01660    0.00127   -0.00195   -0.00406
AFIX  23
H25A  2    0.983048    0.520493    0.653313    11.00000   -1.20000
H25B  2    1.134809    0.547154    0.726241    11.00000   -1.20000
AFIX   0
C26   1    0.768185    0.599585    0.430141    11.00000    0.03823    0.03066 =
         0.01544   -0.00019    0.00047    0.00489
AFIX  13
H26   2    0.645718    0.605765    0.481967    11.00000   -1.20000
AFIX   0
C27   1    0.903618    0.634543    0.415039    11.00000    0.04279    0.02484 =
         0.02944    0.00178    0.00202    0.00338
AFIX 137
H27A  2    0.979465    0.640404    0.484287    11.00000   -1.50000
H27B  2    0.806575    0.655018    0.394842    11.00000   -1.50000
H27C  2    1.011939    0.630695    0.356272    11.00000   -1.50000
AFIX   0
C28   1    0.662503    0.588602    0.318911    11.00000    0.03250    0.07229 =
         0.01785   -0.00169   -0.00008    0.00130
AFIX 137
H28A  2    0.775936    0.587487    0.261572    11.00000   -1.50000
H28B  2    0.551826    0.606971    0.298309    11.00000   -1.50000
H28C  2    0.592664    0.564377    0.326248    11.00000   -1.50000
AFIX   0
C29   1    1.405352    0.497658    0.633593    11.00000    0.03382    0.04121 =
         0.03216   -0.00135   -0.00245    0.00943
AFIX 137
H29A  2    1.306106    0.476408    0.636354    11.00000   -1.50000
H29B  2    1.450680    0.504228    0.708789    11.00000   -1.50000
H29C  2    1.535111    0.491368    0.589591    11.00000   -1.50000
AFIX   0
HKLF 4 1 0 -0.5 0 0 0 -1 1 0 0

REM  a P212121
REM R1 =  0.0926 for    3526 Fo > 4sig(Fo)  and  0.1225 for all    4665 data
REM    305 parameters refined using      0 restraints

END

WGHT      0.0000      0.0000

REM Highest difference peak  0.371,  deepest hole -0.291,  1-sigma level  0.083
Q1    1   0.6646  0.6384  0.9726  11.00000  0.05    0.37
Q2    1   0.6970  0.5856  0.3842  11.00000  0.05    0.32
Q3    1   0.7441  0.5850  0.9178  11.00000  0.05    0.32
Q4    1   0.6298  0.6033  0.8803  11.00000  0.05    0.32
Q5    1   1.3064  0.5028  0.5513  11.00000  0.05    0.32
Q6    1   1.1208  0.5591  0.4877  11.00000  0.05    0.30
Q7    1   0.7699  0.5994  0.8231  11.00000  0.05    0.29
;
_shelx_res_checksum                99205
_shelx_hkl_file
;
  -2   0   0  152.18   54.49
  -2   0   0  138.59   54.29
  -2   0   0  159.48   53.79
   2   0   0  142.99   54.29
   2   0   0  148.29   54.49
   2   0   0  130.79   53.79
  -3   0   0   19.30    3.90
  -3   0   0   -3.50   10.80
  -3   0   0    5.10    6.70
   3   0   0    2.80    6.60
   3   0   0   -5.40    9.30
   3   0   0    4.40    3.40
  -4   0   0   56.59   21.40
  -4   0   0   95.69   26.60
  -4   0   0   73.99   24.10
   4   0   0   68.59   23.60
   4   0   0   41.70   21.40
   4   0   0   71.29   25.70
  -5   0   0   -2.90    7.20
  -5   0   0    1.00   13.80
   5   0   0   -4.20    6.20
   5   0   0   -3.90   12.10
   5   0   0    0.70    2.50
  -6   0   0    5.00    9.20
  -6   0   0    2.40   13.50
  -7   0   0   -0.70    6.90
  -7   0   0    2.60   14.10
  -7   0   0   10.30    3.50
   7   0   0   -1.90    3.90
  -8   0   0  308.67  133.29
  -8   0   0  378.76  131.79
  -9   0   0   -1.40   10.40
  -9   0   0   15.30    6.00
 -10   0   0  220.28   92.89
 -10   0   0  243.98   88.79
 -11   0   0   11.50    6.40
 -11   0   0   -3.40   13.00
 -12   0   0  119.29   45.00
 -13   0   0    1.20   15.60
 -13   0   0    1.50    6.40
 -14   0   0   19.70   11.30
 -14   0   0   36.80   23.00
 -15   0   0    5.40    7.80
 -15   0   0    9.80   16.60
 -16   0   0  153.48   61.49
 -16   0   0  194.08   70.59
 -17   0   0   25.40   11.90
 -17   0   0   23.80   21.70
  17  -1   0   -8.30   13.20
 -17   1   0   19.90    8.80
 -17   1   0  -10.00   14.90
 -16   1   0   18.80   18.20
 -16   1   0   18.40   11.00
 -15   1   0    8.50    8.40
 -15   1   0    3.40   14.10
 -14   1   0  -12.60   15.40
 -14   1   0   11.20    7.80
 -13   1   0    9.60    7.50
 -13   1   0    1.50   14.20
 -12   1   0    7.50    6.60
 -12   1   0   -0.20   11.80
 -11   1   0   -1.30    5.50
 -11   1   0    2.90   12.70
 -10   1   0   -3.20    9.90
 -10   1   0    0.40    4.70
  -9   1   0   -3.40    3.70
  -9   1   0   -8.50    7.30
  -8   1   0   -3.00    3.50
  -8   1   0   -1.40    8.40
  -7   1   0    1.30    8.30
  -7   1   0    2.50    3.40
  -6   1   0    4.60    3.60
  -6   1   0    0.70   14.70
  -6   1   0    3.80    7.70
   5  -1   0   -4.40   13.00
   5  -1   0   -1.50    5.80
   5  -1   0   -1.20    2.70
  -5   1   0   -5.00    6.70
  -5   1   0   -0.60   14.50
  -5   1   0    0.80    2.70
   4  -1   0   17.80   13.50
   4  -1   0   -0.50    6.10
   4  -1   0   -5.70    2.50
  -4   1   0   -0.50    2.70
  -4   1   0    6.60   13.70
  -4   1   0    7.50    6.80
   3  -1   0    0.80    2.60
   3  -1   0    0.10    5.10
   3  -1   0   -0.10   11.00
  -3   1   0   -0.80    5.70
  -3   1   0    0.40    2.90
  -3   1   0    1.40   11.20
   2  -1   0    1.30    2.30
   2  -1   0    0.90    3.70
   2  -1   0    1.30    9.70
  -2   1   0    1.50    4.10
  -2   1   0    5.90    9.90
  -2   1   0   -1.60    2.50
   1  -1   0   -1.90    2.20
   1  -1   0    5.60    6.80
  -1   1   0    0.50    2.10
  -1   1   0   -7.30    6.00
  -1   1   0   -0.60    2.10
  -1  -1   0   -1.00    3.00
  -1  -1   0   -1.80    1.90
  -1  -1   0   -3.90    1.60
   1   1   0    2.10    1.30
   1   1   0    2.80    2.60
   1   1   0   -1.30    3.00
  -2  -1   0   -1.80    2.60
  -2  -1   0   -4.30    1.80
  -2  -1   0   12.40    6.30
  -2  -1   0    3.30    5.20
   2   1   0   -2.80    5.00
   2   1   0   -3.30    2.90
   2   1   0    1.00    1.80
   2   1   0   -1.40    4.90
  -3  -1   0   -8.50    2.50
  -3  -1   0   -6.00    9.10
  -3  -1   0   -2.40    6.20
   3   1   0    3.80    7.80
   3   1   0    2.30    6.20
   3   1   0    4.10    2.40
   3   1   0   -0.80    3.30
  -4  -1   0   -1.10   10.50
  -4  -1   0   -2.80    2.20
  -4  -1   0   -2.10    6.90
   4   1   0   -2.90    2.10
   4   1   0   -4.90    6.10
   4   1   0    5.60    9.90
   4   1   0    0.60    3.70
  -5  -1   0    0.20    2.80
  -5  -1   0    1.90    7.60
  -5  -1   0   12.40   12.10
   5   1   0    0.10    2.30
   5   1   0   -1.00    3.80
   5   1   0   -4.10    6.40
  -6  -1   0   -3.10   12.40
  -6  -1   0   -1.50    3.10
  -6  -1   0   -5.50    7.10
   6   1   0    1.50    3.90
  -7  -1   0   12.80   13.70
  -7  -1   0    2.30    3.30
  -7  -1   0  -10.50    6.30
  -8  -1   0   -1.60    3.70
  -8  -1   0   -8.70    8.00
  -8  -1   0    5.40   13.40
  -9  -1   0   -1.60    4.10
  -9  -1   0    1.90   10.40
 -10  -1   0   -4.20    4.50
 -10  -1   0   -1.20   12.10
 -11  -1   0    5.20   12.50
 -11  -1   0   -1.80    4.70
 -12  -1   0   14.40   16.90
 -12  -1   0    0.40    5.40
 -13  -1   0    7.50    6.00
 -13  -1   0   -9.40   12.50
 -14  -1   0    5.60    7.30
 -14  -1   0   21.60   17.50
 -15  -1   0   15.90    9.40
 -15  -1   0    7.80   17.80
 -16  -1   0  113.49   52.99
 -17  -1   0    9.40   19.70
  17  -2   0   16.00   14.90
 -17   2   0    2.70   22.00
 -17   2   0  -11.40    8.70
  16  -2   0   14.00   13.10
 -16   2   0   18.40   11.40
 -16   2   0    5.20   19.00
 -15   2   0   -4.60    8.30
 -15   2   0  -11.20   13.00
 -14   2   0   12.90   16.50
 -14   2   0   -7.00    7.50
 -13   2   0   14.60    9.00
 -13   2   0    9.80   16.30
 -12   2   0   36.40   16.30
 -12   2   0   45.90   22.50
 -11   2   0  166.58   62.79
 -11   2   0  172.68   67.49
 -10   2   0   40.70   24.00
 -10   2   0   57.49   20.70
  -9   2   0   48.80   25.40
  -9   2   0   58.49   21.70
  -8   2   0  369.06  139.19
  -8   2   0  386.36  140.59
  -7   2   0  303.17  110.29
  -7   2   0  288.47  109.09
  -6   2   0   85.29   35.20
  -6   2   0  117.99   38.10
   5  -2   0  180.68   58.39
   5  -2   0  133.49   55.99
  -5   2   0  233.18   62.29
  -5   2   0  154.98   56.99
  -5   2   0  131.79   55.99
   4  -2   0  496.55  178.48
   4  -2   0  498.85  177.28
   4  -2   0  408.76  177.28
  -4   2   0  490.15  177.78
  -4   2   0  501.05  178.48
  -4   2   0  492.65  177.28
   3  -2   0 2759.72 1001.10
   3  -2   0 2565.64 1000.40
   3  -2   0 2728.53 1000.40
  -3   2   0 2739.63 1000.40
  -3   2   0 2748.53 1000.60
   2  -2   0 6071.09 2305.17
  -2   2   0 6413.56 2305.17
  -2   2   0 6517.65 2305.17
  -2   2   0 5966.90 2305.17
   1  -2   0 1269.67  433.46
  -1   2   0 1200.38  433.46
  -1   2   0 1046.90  433.76
   0  -2   0    1.50    3.20
   0  -2   0   -4.20    3.20
   0  -2   0   -4.80    7.90
   0   2   0   -2.60    2.90
   0   2   0    1.30    7.70
   0   2   0   -1.40    3.50
  -1  -2   0 1206.38  452.45
  -1  -2   0 1196.58  452.55
  -1  -2   0 1135.09  452.35
   1   2   0 1213.08  452.55
   1   2   0 1213.28  452.35
   1   2   0 1263.87  452.45
   1   2   0 1336.97  452.45
  -2  -2   0 5995.00 2240.68
  -2  -2   0 5833.42 2240.88
  -2  -2   0 6069.89 2240.58
   2   2   0 5779.52 2240.88
   2   2   0 6672.13 2240.58
   2   2   0 6035.00 2240.68
  -3  -2   0 2760.22 1009.00
  -3  -2   0 2762.12 1009.40
  -3  -2   0 2697.23 1008.80
   3   2   0 2789.02 1009.00
   3   2   0 2645.64 1009.40
  -4  -2   0  523.35  189.28
  -4  -2   0  501.75  188.48
  -4  -2   0  503.95  188.48
  -4  -2   0  492.05  188.28
   4   2   0  528.75  188.58
   4   2   0  518.05  189.18
  -5  -2   0  152.88   56.79
  -5  -2   0  153.18   56.09
  -5  -2   0  165.68   57.79
   5   2   0  137.69   56.39
  -6  -2   0  140.49   43.50
  -6  -2   0   87.89   38.80
  -6  -2   0  134.79   41.60
  -7  -2   0  274.27  105.39
  -7  -2   0  279.27  107.19
  -7  -2   0  300.37  106.39
  -8  -2   0  325.77  122.19
  -8  -2   0  338.77  124.09
  -9  -2   0   46.40   26.70
  -9  -2   0   64.09   22.60
  -9  -2   0   53.99   27.00
 -10  -2   0   32.40   20.50
 -10  -2   0   40.80   15.70
 -11  -2   0  123.99   49.20
 -11  -2   0  172.58   56.19
 -12  -2   0   37.30   15.30
 -12  -2   0   31.60   22.50
 -13  -2   0   -9.80   13.30
 -13  -2   0   16.40    7.00
 -14  -2   0   -3.40   12.30
 -14  -2   0   12.60    6.30
 -15  -2   0    5.30   18.30
 -15  -2   0   16.80    8.60
 -16  -2   0   27.10   11.50
 -16  -2   0   17.20   20.10
 -17  -2   0   33.10   25.30
  17  -3   0   23.70   16.10
 -17   3   0  -12.70    9.70
 -17   3   0   23.80   21.50
  16  -3   0    3.70   13.50
 -16   3   0   11.90   17.30
 -16   3   0  -14.10    8.40
  15  -3   0   21.70   11.80
 -15   3   0  -10.40    8.40
 -15   3   0   -6.90   13.50
  14  -3   0   -0.40    9.10
 -14   3   0  -12.80    7.20
 -14   3   0    4.70   17.80
  13  -3   0   12.80    9.90
 -13   3   0   -4.90   14.90
 -13   3   0   -4.20    6.50
  12  -3   0    5.00    7.20
 -12   3   0  -11.40    6.30
 -12   3   0    6.30   13.20
  11  -3   0   -5.30    6.50
 -11   3   0   -0.90    6.00
 -11   3   0   -7.60   10.10
  10  -3   0   -2.70    5.40
 -10   3   0    6.40   11.50
 -10   3   0    5.00    5.90
   9  -3   0  -13.30    4.70
  -9   3   0    3.10    5.00
  -9   3   0   -4.80    9.20
   8  -3   0   -4.00    4.50
  -8   3   0    6.60    4.40
  -8   3   0    4.60    8.50
   7  -3   0    1.30    4.50
  -7   3   0    2.30    8.60
  -7   3   0   -0.30    3.90
   6  -3   0    1.00    4.20
  -6   3   0    4.80    7.00
  -6   3   0    0.20    4.30
   5  -3   0    1.10    4.60
   5  -3   0    2.50   16.40
  -5   3   0  -10.10    5.50
  -5   3   0    2.70    4.50
   4  -3   0   -4.10    4.30
   4  -3   0   -1.60   15.70
  -4   3   0    0.80    5.80
  -4   3   0    6.40   14.60
  -4   3   0   -0.30    4.40
   3  -3   0   -2.60    5.10
   3  -3   0   11.90   14.70
  -3   3   0    3.50    4.80
  -3   3   0    6.20    5.20
  -3   3   0    4.60    4.80
  -3   3   0   -7.20   13.10
   2  -3   0    4.00   14.90
   2  -3   0    0.90    4.80
  -2   3   0    4.40    4.80
  -2   3   0   -2.30   13.60
   1  -3   0   -5.60   13.00
   1  -3   0   -3.60    4.70
  -1   3   0   -8.40   11.50
  -1   3   0   -0.40    3.50
  -1   3   0   -2.00    4.60
   0  -3   0    0.30    4.90
   0  -3   0   -1.60    3.80
   0   3   0    5.00   11.40
   0   3   0   -2.00    4.70
   0   3   0    0.90    4.10
  -1  -3   0    2.80    5.10
  -1  -3   0   -3.30    4.70
   1   3   0   -2.30    4.90
   1   3   0   -4.10    4.80
   1   3   0   -0.10    2.80
   1   3   0    1.40    8.80
  -2  -3   0   -0.90    3.80
  -2  -3   0    1.30    4.60
  -2  -3   0    4.90    6.90
   2   3   0   -7.50    2.80
   2   3   0    4.70    5.40
   2   3   0    3.40    6.00
  -3  -3   0   -3.70    6.10
  -3  -3   0    2.40    4.80
  -3  -3   0   -5.40    3.40
   3   3   0    2.30    6.90
   3   3   0   -6.60    4.50
   3   3   0   -1.90    5.10
  -4  -3   0   -5.80    7.40
  -4  -3   0   -0.90    3.80
  -4  -3   0   -0.50    3.80
   4   3   0    5.70    5.10
   4   3   0   -6.60    2.60
   4   3   0   -2.10    6.40
  -5  -3   0   -1.50    8.00
  -5  -3   0  -12.90    3.00
  -5  -3   0    6.40    4.30
  -6  -3   0   -2.00    3.10
  -6  -3   0    5.30    9.30
  -7  -3   0   -0.80    8.00
  -7  -3   0    2.70    7.90
  -7  -3   0   -7.20    2.90
  -8  -3   0    8.10   10.30
  -8  -3   0   -3.30    9.20
  -8  -3   0   -4.10    3.00
  -9  -3   0   22.30   10.80
  -9  -3   0    2.60   10.80
  -9  -3   0    0.30    3.90
 -10  -3   0    6.30   13.10
 -10  -3   0   -2.40    3.80
 -10  -3   0   11.40   13.90
 -11  -3   0    1.70    4.40
 -11  -3   0    5.60   13.10
 -12  -3   0  -12.90   13.20
 -12  -3   0    7.90    5.00
 -13  -3   0    6.30    5.70
 -13  -3   0    7.00   15.00
 -14  -3   0   18.00   18.70
 -14  -3   0   20.00    9.20
 -15  -3   0   20.40   10.20
 -15  -3   0   21.90   19.80
 -16  -3   0   24.60   11.60
 -17  -3   0   76.09   19.20
 -17  -3   0  -14.60   23.60
  16  -4   0   63.69   32.40
 -16   4   0   91.69   37.10
  15  -4   0   41.60   19.20
 -15   4   0   54.89   23.20
 -15   4   0   21.00   16.40
  14  -4   0   20.30   12.60
 -14   4   0   16.10   22.20
 -14   4   0   20.50   11.40
  13  -4   0  160.98   56.99
 -13   4   0  138.99   55.39
 -13   4   0  132.79   63.29
  12  -4   0   26.80   15.00
 -12   4   0   22.00   19.00
 -12   4   0   32.90   13.50
  11  -4   0    5.80   11.00
 -11   4   0   30.50   16.90
 -11   4   0   29.30   10.70
  10  -4   0    5.60    7.50
 -10   4   0    9.90   11.30
 -10   4   0   -2.60    5.40
   9  -4   0   32.60   14.70
  -9   4   0   29.80   13.70
  -9   4   0   35.90   18.00
   8  -4   0   78.69   25.30
  -8   4   0   45.90   24.20
  -8   4   0   73.89   27.50
   7  -4   0  143.19   55.09
  -7   4   0  151.98   56.19
   6  -4   0  201.38   71.99
  -6   4   0  203.18   72.59
  -6   4   0  173.08   71.99
   5  -4   0  733.03  285.87
  -5   4   0  777.52  285.97
  -5   4   0  808.72  286.17
   4  -4   0   61.59   22.90
   4  -4   0   30.80   12.60
  -4   4   0   24.80   12.40
  -4   4   0   30.80   12.40
  -4   4   0   22.80   12.80
   3  -4   0   13.60    6.80
   3  -4   0    4.10   16.70
  -3   4   0   -6.90   15.20
  -3   4   0    8.30    5.70
   2  -4   0   73.39   33.10
   2  -4   0   90.79   28.00
  -2   4   0   51.79   32.30
  -2   4   0  102.59   28.10
  -2   4   0   61.69   26.80
   1  -4   0   19.60    9.30
   1  -4   0   16.20    7.70
  -1   4   0   20.80    8.00
  -1   4   0    2.60   15.30
  -1   4   0   17.70    8.80
   0  -4   0   71.59   25.30
   0  -4   0   63.69   24.60
   0   4   0   60.99   24.60
   0   4   0   52.39   27.90
   0   4   0   75.99   28.00
  -1  -4   0   15.00    7.20
  -1  -4   0    6.00    6.80
   1   4   0   11.50    7.00
   1   4   0   17.60    7.50
   1   4   0   -9.50   11.10
  -2  -4   0  101.99   33.60
  -2  -4   0   88.99   33.90
   2   4   0   86.69   33.50
   2   4   0   69.99   32.40
   2   4   0   96.09   34.00
   2   4   0   88.99   33.90
  -3  -4   0    5.50    8.10
  -3  -4   0    0.20    4.10
  -3  -4   0    6.50    5.40
   3   4   0    3.60    7.10
   3   4   0   -1.90    3.10
   3   4   0   -0.30    5.80
  -4  -4   0   19.60   10.30
  -4  -4   0   28.50   13.10
  -4  -4   0   19.70    9.90
  -5  -4   0  778.02  278.57
  -5  -4   0  708.33  277.47
  -5  -4   0  774.92  277.67
  -6  -4   0  190.58   69.99
  -6  -4   0  177.18   70.09
  -6  -4   0  205.88   71.79
  -7  -4   0  132.79   52.09
  -7  -4   0  166.98   56.09
  -8  -4   0   63.99   29.20
  -8  -4   0   65.09   25.10
  -9  -4   0   36.40   19.90
  -9  -4   0   31.70   13.60
 -10  -4   0   -8.60    3.60
 -10  -4   0    2.00   13.70
 -11  -4   0   19.20    9.50
 -11  -4   0   19.50   17.50
 -12  -4   0   41.90   21.60
 -12  -4   0   22.90   11.50
 -13  -4   0  114.79   54.19
 -13  -4   0  129.79   48.10
 -14  -4   0   23.90   11.70
 -14  -4   0   25.70   21.00
 -15  -4   0   29.90   13.90
 -15  -4   0   34.70   22.20
 -16  -4   0   53.69   20.90
 -16  -4   0   39.30   29.40
  16  -5   0   31.50   15.40
 -16   5   0   10.30   18.10
 -16   5   0   -0.20   11.30
  15  -5   0   37.40   14.90
 -15   5   0   -1.40   10.00
 -15   5   0   10.50   13.90
  14  -5   0   24.10   12.80
 -14   5   0    0.30    9.30
 -14   5   0   25.60   17.80
  13  -5   0   21.60   11.90
 -13   5   0   -8.20    6.60
 -13   5   0   -7.80   14.10
  12  -5   0   -9.50    8.50
 -12   5   0    9.30   13.70
 -12   5   0   -2.20    6.70
  11  -5   0    2.30    8.40
 -11   5   0   -0.90    6.70
 -11   5   0   18.30   12.60
  10  -5   0   -6.60    7.60
 -10   5   0    6.20   11.80
 -10   5   0   -5.50    5.70
   9  -5   0   -3.00    6.40
  -9   5   0   -1.50    5.40
  -9   5   0    7.60    9.50
   8  -5   0    8.80    7.20
  -8   5   0   -1.10    6.20
  -8   5   0   14.80    9.10
   7  -5   0   -5.00    5.00
  -7   5   0   -4.10    6.70
  -7   5   0   -3.60    5.30
   6  -5   0   -6.90    5.00
  -6   5   0   -2.80    6.00
  -6   5   0    3.00    5.40
   5  -5   0   -6.70    5.00
  -5   5   0   -1.00    5.10
  -5   5   0    7.00    5.50
   4  -5   0    5.30    5.90
  -4   5   0   -7.50    4.50
  -4   5   0   -0.10    4.80
  -4   5   0   -3.40    4.90
   3  -5   0    5.00    6.00
  -3   5   0   -8.00    4.70
  -3   5   0   -2.80    3.30
   2  -5   0   -3.80    5.40
  -2   5   0    1.40    3.90
  -2   5   0   -2.20    5.10
  -2   5   0    0.20   15.00
   1  -5   0    3.20    6.40
  -1   5   0   -1.10    5.30
  -1   5   0    3.10    4.40
  -1   5   0    8.50   13.40
   0  -5   0   -1.50    5.80
   0  -5   0    0.80    4.80
   0   5   0    8.90   11.30
   0   5   0   -0.30    5.00
   0   5   0   -3.00    5.30
  -1  -5   0    0.60    5.70
  -1  -5   0    2.60    6.40
   1   5   0   -1.90    5.70
   1   5   0   -3.10    5.40
   1   5   0    1.30    9.70
  -2  -5   0    3.20    5.60
  -2  -5   0    4.40    6.50
   2   5   0   10.70    7.20
   2   5   0    4.50    4.00
   2   5   0   -6.40    8.90
  -3  -5   0    5.30    6.10
  -3  -5   0   -0.60    6.60
   3   5   0    5.80    7.40
   3   5   0   -8.10    7.00
  -4  -5   0   -1.50    4.80
  -4  -5   0   -7.10    3.90
  -4  -5   0    0.80    7.70
  -5  -5   0    4.30    5.60
  -5  -5   0   -6.20    3.80
  -5  -5   0   -3.80    7.10
  -6  -5   0    1.40    4.60
  -6  -5   0    5.50    4.10
  -6  -5   0   -3.70    8.90
  -7  -5   0    2.10    9.50
  -7  -5   0   -2.00    4.00
  -7  -5   0   -0.10    4.40
  -8  -5   0   10.20   11.30
  -8  -5   0  -10.50    4.00
  -9  -5   0    3.20   11.70
  -9  -5   0   -8.20    4.50
 -10  -5   0   -0.50    5.50
 -10  -5   0    6.20   14.10
 -11  -5   0    5.30   14.70
 -11  -5   0    3.00    5.70
 -12  -5   0   -4.60   12.90
 -12  -5   0   -6.20    5.60
 -13  -5   0   16.70   16.00
 -13  -5   0   -3.90    5.10
 -14  -5   0  -19.80   13.90
 -14  -5   0   10.90    6.50
 -15  -5   0   -0.90   16.80
 -15  -5   0    1.80    6.90
 -16  -5   0   44.90   21.10
 -16  -5   0   29.80   26.00
  16  -6   0  -38.10   14.30
 -16   6   0  -17.50   10.00
 -16   6   0   38.10   20.70
 -15   6   0   51.29   27.50
 -15   6   0   56.69   23.70
  14  -6   0   29.20   19.00
 -14   6   0   53.69   24.30
 -14   6   0   40.80   18.20
  13  -6   0   19.50   12.50
 -13   6   0    2.70   15.10
 -13   6   0   15.90    9.90
  12  -6   0   33.30   14.50
 -12   6   0   18.70   12.60
  11  -6   0    4.10    8.80
 -11   6   0    5.80   11.00
 -11   6   0   -8.80    6.70
  10  -6   0   23.60   12.30
 -10   6   0   15.40   10.30
 -10   6   0   22.40   14.40
   9  -6   0   82.99   35.50
  -9   6   0  104.19   37.60
  -9   6   0   85.49   35.10
   8  -6   0  280.57  109.89
  -8   6   0  332.57  111.89
  -8   6   0  285.77  109.89
   7  -6   0  104.99   40.40
  -7   6   0   89.09   39.80
  -7   6   0  116.69   41.10
   6  -6   0   36.70   16.50
  -6   6   0   30.60   16.20
  -6   6   0   52.59   16.50
   5  -6   0  110.09   47.00
  -5   6   0  117.99   47.40
  -5   6   0  138.09   47.00
   4  -6   0    1.20    8.40
  -4   6   0   10.20    5.50
  -4   6   0   -2.60    5.40
  -4   6   0    2.90    4.10
   3  -6   0  332.57  125.79
  -3   6   0  341.07  125.29
   2  -6   0  335.97  126.99
  -2   6   0  343.87  126.39
   1  -6   0   40.40   15.60
   1  -6   0   31.70   16.70
  -1   6   0   44.50   16.00
  -1   6   0   25.00   21.70
   0  -6   0    2.30    5.40
   0  -6   0   -4.10   11.40
   0   6   0    7.60    6.10
   0   6   0   -2.10   13.50
  -1  -6   0   30.70   15.10
  -1  -6   0   51.89   15.80
   1   6   0   15.70   18.40
   1   6   0   38.90   15.40
  -2  -6   0  334.77  112.39
  -2  -6   0  339.37  112.09
   2   6   0  244.58  111.99
   2   6   0  315.67  112.29
  -3  -6   0  349.27  123.79
  -3  -6   0  340.47  123.29
   3   6   0  315.87  123.09
  -4  -6   0   11.20    6.90
  -4  -6   0    0.60    8.50
  -5  -6   0  143.39   50.29
  -5  -6   0  112.59   46.90
  -5  -6   0  130.69   47.30
  -6  -6   0   13.40   16.40
  -6  -6   0   46.50   15.70
  -6  -6   0   45.50   14.90
  -7  -6   0  110.99   40.40
  -7  -6   0  101.89   37.20
  -7  -6   0   82.79   36.30
  -8  -6   0  304.97  119.49
  -8  -6   0  336.77  119.79
  -8  -6   0  327.37  121.79
  -9  -6   0   86.99   36.60
  -9  -6   0  122.99   42.90
 -10  -6   0   -9.90   13.60
 -10  -6   0    8.20    6.80
 -11  -6   0    5.60    5.80
 -11  -6   0   -0.50   13.70
 -12  -6   0   21.60   20.60
 -12  -6   0   25.70   11.70
 -13  -6   0   10.60    7.10
 -13  -6   0   -4.90   14.20
 -14  -6   0   77.99   31.20
 -14  -6   0   35.20   17.80
 -15  -6   0   47.90   32.20
 -15  -6   0   55.09   22.40
 -16  -6   0   37.90   13.10
 -16  -6   0    1.70   19.30
  15  -7   0    7.60   14.60
 -15   7   0    8.10   11.40
 -15   7   0   13.30   14.90
  14  -7   0   11.90   13.20
 -14   7   0   -7.10    8.00
 -14   7   0   17.50   17.20
  13  -7   0   21.30   11.90
 -13   7   0    8.50   10.00
 -13   7   0    0.70   13.60
  12  -7   0    4.80    9.90
 -12   7   0  -17.10   13.10
 -12   7   0   -8.50    7.40
  11  -7   0   -0.90    9.10
 -11   7   0    9.00   11.90
 -11   7   0  -13.40    6.30
  10  -7   0   -6.70    8.70
 -10   7   0    5.20   10.60
 -10   7   0   -8.50    6.30
   9  -7   0    6.50    8.90
  -9   7   0   -5.30    7.90
  -9   7   0    8.70    7.30
   8  -7   0    6.20    8.30
  -8   7   0    6.80    9.30
  -8   7   0    8.50    8.10
   7  -7   0    4.60    8.20
  -7   7   0   13.80    8.50
  -7   7   0   10.90    7.70
   6  -7   0   -9.60    6.00
  -6   7   0    6.30    7.00
  -6   7   0    6.60    6.80
   5  -7   0    2.40    6.70
  -5   7   0    5.70    4.00
  -5   7   0   -6.80    4.60
  -5   7   0   -4.20    5.50
   4  -7   0    5.80    7.10
   3  -7   0    4.70    7.50
   2  -7   0   -8.80    6.00
  -2   7   0    4.30    4.40
   1  -7   0   -2.70    4.00
   1  -7   0   -1.90    6.20
  -1   7   0    0.40    4.50
   0  -7   0   -2.50    4.90
   0  -7   0    0.00    6.30
   0   7   0    3.20    5.20
  -1  -7   0   -0.10    5.60
  -1  -7   0    5.50    7.30
   1   7   0    0.60    5.90
   1   7   0    9.70   11.60
  -2  -7   0   -6.00    5.80
  -2  -7   0   -9.10    5.50
   2   7   0  -17.50   10.80
   2   7   0    4.20    7.30
  -3  -7   0   -9.90    5.30
  -3  -7   0    1.50    7.30
   3   7   0   -1.40    9.70
  -4  -7   0    7.20    8.20
  -4  -7   0   -1.10    5.20
  -5  -7   0   -0.30    6.20
  -5  -7   0    8.10    9.80
  -6  -7   0   -1.70   10.00
  -6  -7   0   -8.90    5.50
  -6  -7   0   -1.00    4.80
  -7  -7   0   14.60   13.20
  -7  -7   0   19.90    8.80
  -7  -7   0    4.70    7.00
  -8  -7   0   -4.30    5.40
  -8  -7   0    6.10   11.90
  -8  -7   0   -1.00    5.70
  -9  -7   0  -10.00   11.00
  -9  -7   0   -1.50    5.50
 -10  -7   0   -3.80   11.20
 -10  -7   0  -14.10    4.40
 -11  -7   0    3.90    6.30
 -11  -7   0   14.30   16.40
 -12  -7   0    5.60    7.00
 -12  -7   0    0.20   14.40
 -13  -7   0    0.10   17.00
 -13  -7   0   11.60    8.50
 -14  -7   0    7.10    7.80
 -14  -7   0   -1.80   16.60
 -15  -7   0   25.00   21.80
 -15  -7   0   12.50    8.90
  15  -8   0    6.30   17.10
 -15   8   0    9.20   11.40
 -15   8   0   11.90   18.20
 -14   8   0   71.89   32.20
 -14   8   0   80.19   35.60
  13  -8   0   72.79   27.80
 -13   8   0   40.70   24.50
 -13   8   0   79.29   29.20
  12  -8   0   22.30   12.50
 -12   8   0   21.40   15.50
 -12   8   0    1.90    8.90
  11  -8   0   11.10   12.80
 -11   8   0   12.80   11.40
 -11   8   0   50.69   17.20
  10  -8   0    4.00   10.30
 -10   8   0    4.40    9.30
 -10   8   0   21.50   11.70
   9  -8   0  109.69   29.50
  -9   8   0   42.60   26.80
   8  -8   0   31.30   15.50
  -8   8   0   28.00   14.70
  -8   8   0   31.60   14.70
   7  -8   0  190.98   62.29
  -7   8   0  161.88   60.59
  -7   8   0  132.19   61.19
   6  -8   0  174.98   50.49
  -6   8   0  117.09   47.50
  -6   8   0  135.19   48.80
   5  -8   0  198.08   72.59
  -5   8   0  186.68   72.39
   4  -8   0  140.39   54.39
   3  -8   0  166.38   63.99
   2  -8   0   58.39   24.60
   1  -8   0   14.30    6.90
   1  -8   0    7.80    9.30
  -1   8   0   10.60    7.60
   0  -8   0  131.79   48.80
   0  -8   0  121.69   48.00
  -1  -8   0   21.90   11.00
  -1  -8   0   14.30   11.20
   1   8   0   22.10   11.10
  -2  -8   0   50.99   21.70
  -2  -8   0   49.80   21.40
   2   8   0   48.00   23.70
  -3  -8   0  162.98   51.69
  -3  -8   0  159.58   50.89
   3   8   0  100.99   50.49
  -4  -8   0  125.69   46.70
  -4  -8   0  113.49   47.50
   4   8   0  119.89   47.80
  -5  -8   0  178.48   70.99
  -5  -8   0  202.48   72.19
  -6  -8   0  161.48   61.69
  -6  -8   0  158.68   63.59
  -7  -8   0  152.38   62.59
  -7  -8   0  203.88   66.79
  -8  -8   0   36.60   20.00
  -8  -8   0   29.00   13.20
  -8  -8   0   20.40   12.50
  -9  -8   0   79.39   34.50
  -9  -8   0   78.79   29.10
  -9  -8   0   61.59   27.70
 -10  -8   0   12.20    8.40
 -10  -8   0    6.80   15.80
 -11  -8   0   18.80    8.60
 -11  -8   0   -5.40   13.20
 -12  -8   0   -9.70    5.70
 -12  -8   0   10.50   16.00
 -13  -8   0   31.70   24.60
 -13  -8   0   45.50   18.50
 -14  -8   0   83.99   35.20
 -14  -8   0  112.29   50.39
 -15  -8   0   33.40   24.20
 -15  -8   0   31.20   15.00
  14  -9   0   11.20   13.90
 -14   9   0    8.20   13.40
 -14   9   0   -7.20    8.40
 -13   9   0   -0.30   13.60
 -13   9   0   -8.20    8.00
  12  -9   0    0.40   11.10
 -12   9   0   26.40   11.90
 -12   9   0   -9.00    7.50
  11  -9   0   22.80   12.30
 -11   9   0  -11.40    7.70
 -11   9   0   -0.60   10.50
  10  -9   0  -11.20    9.10
 -10   9   0  -13.80    7.60
 -10   9   0   -2.30    9.20
   9  -9   0   14.10   11.10
  -9   9   0  -16.10    6.90
  -9   9   0   -0.90    7.20
   8  -9   0  -19.60    7.10
  -8   9   0    5.10    7.70
   7  -9   0  -13.00    7.90
  -7   9   0   12.50    7.90
   6  -9   0   -7.70    8.60
  -6   9   0   -3.20    6.20
   5  -9   0   13.30    9.60
  -5   9   0  -10.90    5.70
   4  -9   0   -3.90    7.60
   3  -9   0    6.80    8.90
   2  -9   0   -4.20    8.30
  -2   9   0   13.20    6.30
   1  -9   0    0.90    8.10
   1  -9   0    8.30    5.20
  -1   9   0    8.50    7.00
   0  -9   0   -4.30    5.80
   0  -9   0   -1.90    7.90
   0   9   0   -1.60    6.10
  -1  -9   0   -5.10    7.40
  -1  -9   0   -0.70    7.30
   1   9   0    8.30    7.10
  -2  -9   0   -1.90    7.50
  -2  -9   0   -1.00    7.40
  -3  -9   0    7.20    8.50
  -3  -9   0  -14.60    7.40
   3   9   0   37.70   16.00
  -4  -9   0   -9.90    5.20
  -4  -9   0   -2.40    8.70
   4   9   0   11.80   14.40
  -5  -9   0   -1.20    7.00
  -5  -9   0   -4.90    9.30
  -6  -9   0    1.50   10.90
  -6  -9   0    8.30    8.20
  -7  -9   0    5.50    9.30
  -7  -9   0   -6.20   10.90
  -8  -9   0   -7.40   12.30
  -8  -9   0   -4.10    6.80
  -9  -9   0   11.40   15.10
  -9  -9   0   -0.60    6.10
 -10  -9   0   -5.10   13.10
 -10  -9   0  -12.80    6.10
 -11  -9   0   11.00   16.20
 -11  -9   0    6.10    7.90
 -12  -9   0    5.20    8.50
 -12  -9   0   29.50   20.60
 -13  -9   0  -10.60    7.20
 -13  -9   0   22.00   20.30
 -14  -9   0   22.70   20.40
 -14  -9   0    6.60   15.80
  14 -10   0   48.70   22.20
 -14  10   0    8.80   11.10
  13 -10   0  117.29   35.40
 -13  10   0   50.39   30.60
 -13  10   0   86.99   32.80
 -12  10   0   60.59   31.20
 -12  10   0   90.09   32.40
  11 -10   0   27.10   13.80
 -11  10   0    4.40   10.90
  10 -10   0   10.40   12.00
 -10  10   0   -2.20    8.70
   9 -10   0  101.59   29.30
  -9  10   0   41.80   26.40
   8 -10   0   27.40   14.00
  -8  10   0   10.50   10.20
   7 -10   0   -5.70    8.80
  -7  10   0    7.40    8.70
   6 -10   0   14.60   11.70
  -6  10   0    5.00    8.30
   5 -10   0   25.30   13.60
  -5  10   0   13.10   10.10
   4 -10   0  381.36  142.49
   3 -10   0   34.70   17.30
   2 -10   0  202.88   76.89
   1 -10   0  418.86  158.18
  -1  10   0  427.06  157.58
   0 -10   0    6.00    9.60
   0 -10   0    4.50    6.60
   0  10   0    5.10    7.30
  -1 -10   0  441.46  160.78
  -1 -10   0  418.26  160.88
  -2 -10   0  162.38   65.39
  -2 -10   0  191.78   66.79
  -3 -10   0   75.49   28.30
  -3 -10   0   54.99   28.20
   3  10   0   73.59   37.70
  -4 -10   0  351.36  139.69
  -4 -10   0  400.36  140.59
  -5 -10   0   11.50   15.20
  -5 -10   0   48.90   15.70
  -6 -10   0    1.00   12.90
  -6 -10   0   15.20    9.80
  -7 -10   0   50.39   17.40
  -7 -10   0   -2.60    7.60
  -8 -10   0   17.40   12.30
  -8 -10   0   35.10   20.10
  -9 -10   0   81.09   38.10
  -9 -10   0   84.59   34.00
 -10 -10   0   -3.80   12.40
 -11 -10   0   14.60   17.40
 -12 -10   0   86.09   41.70
 -13 -10   0   95.79   49.70
 -14 -10   0   46.20   29.80
  13 -11   0   10.50   16.40
 -13  11   0   13.70   10.50
  12 -11   0    7.00   14.00
 -12  11   0    5.70    8.90
  11 -11   0   -2.90   13.30
 -11  11   0   13.60   10.60
 -10  11   0    1.70   10.00
   9 -11   0   -0.80   12.10
  -9  11   0   21.60   11.10
   8 -11   0    5.90   12.90
  -8  11   0    2.40    9.30
   7 -11   0   -4.20   10.90
  -7  11   0    1.40    9.10
   6 -11   0   12.30   11.30
  -6  11   0   -0.70    8.30
   5 -11   0  -14.20    8.80
  -5  11   0   15.40    9.10
   4 -11   0    3.50    9.70
   3 -11   0    2.70    9.90
   2 -11   0   12.70   11.80
   1 -11   0  -10.20    9.10
   0 -11   0   12.90    8.60
   0 -11   0    3.40   11.20
   0  11   0   16.80    9.40
  -1 -11   0   -0.30    8.70
  -1 -11   0   -0.70   10.40
  -2 -11   0  -11.40    8.20
  -2 -11   0   -5.60    9.20
  -3 -11   0   -9.80   10.70
  -3 -11   0   -2.10   10.10
  -4 -11   0  -17.90    8.70
  -4 -11   0    5.00    8.50
   4  11   0   11.40   21.40
  -5 -11   0   -5.90   11.70
  -5 -11   0    2.00    7.80
  -6 -11   0   17.50   15.50
  -6 -11   0   12.70   10.90
  -7 -11   0   -9.80   13.20
  -7 -11   0   -9.90    5.00
  -8 -11   0    9.00    8.00
  -8 -11   0  -10.90   12.90
  -9 -11   0    0.30    7.20
  -9 -11   0  -20.70   14.70
 -10 -11   0  -11.30    5.00
 -10 -11   0   -1.20   16.50
 -11 -11   0    5.50   18.70
 -12 -11   0  -18.70   16.10
 -13 -11   0  -16.70   15.90
  12 -12   0   43.70   20.80
 -12  12   0   28.20   17.00
  11 -12   0   22.70   16.60
 -11  12   0    4.60   10.60
  10 -12   0   59.69   19.40
 -10  12   0    4.00   12.30
   9 -12   0   45.80   17.20
  -9  12   0   -5.50    9.50
   8 -12   0   66.29   22.30
  -8  12   0   21.40   16.60
   7 -12   0   41.80   21.20
  -7  12   0   28.20   16.60
   6 -12   0  -21.70   15.50
  -6  12   0   -7.30    8.00
   5 -12   0    1.90   11.30
  -5  12   0    5.70    9.10
   4 -12   0    6.60   12.90
   3 -12   0   11.40   12.80
   2 -12   0  251.77   95.29
   1 -12   0   -0.90   18.00
   0 -12   0   52.99   28.50
   0 -12   0   65.19   26.40
   0  12   0   72.69   30.00
  -1 -12   0    8.30   10.60
  -1 -12   0   23.40   13.60
  -2 -12   0  275.77  100.09
  -2 -12   0  251.87   99.79
  -3 -12   0   10.90   12.80
  -3 -12   0    6.40   10.80
  -4 -12   0   16.70   14.10
  -4 -12   0   31.20   16.50
  -5 -12   0   22.10   13.70
  -5 -12   0   13.90   15.60
  -6 -12   0   13.90   10.90
  -6 -12   0   12.40   15.90
  -7 -12   0   45.90   24.30
  -7 -12   0   35.40   18.60
  -8 -12   0   69.89   30.10
  -8 -12   0   75.69   34.60
  -9 -12   0    8.90    9.50
  -9 -12   0   25.80   19.20
 -10 -12   0   22.20   24.90
 -10 -12   0   48.90   19.20
 -11 -12   0   12.50   18.00
 -12 -12   0   34.40   25.10
  11 -13   0   37.00   19.60
 -11  13   0   -7.40    9.10
  10 -13   0   13.60   15.90
 -10  13   0   20.20   12.50
   9 -13   0   39.50   17.70
  -9  13   0   -0.40   10.10
   8 -13   0    3.00   13.30
  -8  13   0    2.20    8.60
   7 -13   0   14.10   13.80
  -7  13   0   20.70   12.10
   6 -13   0   33.00   16.10
  -6  13   0    6.50   11.70
   5 -13   0   22.80   14.50
  -5  13   0    3.70    9.30
   4 -13   0  -24.20    9.90
   3 -13   0  -20.60    9.60
   2 -13   0   -8.00   10.60
   1 -13   0   -2.90   11.10
   0 -13   0   -4.40   10.00
  -1 -13   0   10.00    9.70
  -1 -13   0  -13.90    8.80
  -2 -13   0   47.20   16.40
  -2 -13   0    9.20   13.50
  -3 -13   0   -6.00    8.00
  -3 -13   0   -6.40   11.90
  -4 -13   0    9.20   14.80
  -4 -13   0    9.00   10.70
  -5 -13   0   18.00   15.00
  -5 -13   0   -3.30    9.80
  -6 -13   0    1.90   13.30
  -6 -13   0   -6.10    9.40
  -7 -13   0    6.00    8.50
  -7 -13   0   15.10   16.10
  -8 -13   0    0.00    8.40
  -8 -13   0   25.60   18.20
  -9 -13   0    9.90   18.00
  -9 -13   0    2.10    7.90
 -10 -13   0   -3.00    8.30
 -10 -13   0   13.50   17.30
  10 -14   0   26.60   17.80
 -10  14   0   -3.40    9.30
   9 -14   0   70.09   23.70
  -9  14   0   10.70   13.40
   8 -14   0   27.20   14.50
  -8  14   0   -4.20    9.60
   7 -14   0   16.20   15.30
  -7  14   0   14.90   11.80
   6 -14   0    8.50   12.60
  -6  14   0   17.80   12.10
   5 -14   0   25.10   15.60
  -5  14   0    4.50   11.10
   4 -14   0   -1.60   12.90
   3 -14   0   -1.70   12.70
   2 -14   0   23.10   16.30
   1 -14   0   -4.30   10.60
   0 -14   0   14.40   13.40
  -1 -14   0   15.40    9.80
  -1 -14   0   -7.20   11.20
  -2 -14   0   -3.50   10.30
  -2 -14   0    0.40    9.90
  -3 -14   0   20.30   14.60
  -3 -14   0   -5.40    8.50
  -4 -14   0   -9.10   13.50
  -4 -14   0   20.80   13.10
  -5 -14   0   13.40   13.50
  -5 -14   0   35.10   21.90
  -6 -14   0   30.80   19.40
  -6 -14   0   22.40   15.60
  -7 -14   0   34.40   22.80
  -7 -14   0   39.70   19.20
  -8 -14   0   44.70   27.00
  -9 -14   0   51.39   24.80
  -9 -14   0   24.10   16.60
 -10 -14   0   12.00   16.40
 -10 -14   0   12.10   10.60
   9 -15   0   23.20   19.80
   8 -15   0   31.30   18.00
  -8  15   0    6.60   12.20
   7 -15   0   12.10   17.00
  -7  15   0   19.20   12.10
   6 -15   0   15.40   13.60
  -6  15   0    5.60   11.30
   5 -15   0   -1.20   13.00
  -5  15   0   -8.40   17.10
   4 -15   0   -4.70   10.80
   3 -15   0    8.40   15.50
   2 -15   0  -16.60    9.40
   1 -15   0    0.00   12.60
   0 -15   0   12.40   12.60
  -1 -15   0   19.00   15.50
  -2 -15   0   24.90   13.20
  -2 -15   0   -2.50   10.70
  -3 -15   0   27.80   16.40
  -3 -15   0    8.80   14.70
  -4 -15   0  -11.20    8.70
  -4 -15   0   -9.00   14.10
  -5 -15   0   -9.10    9.30
  -5 -15   0   10.00   17.00
  -6 -15   0   13.10   19.00
  -7 -15   0    3.40   16.50
  -7 -15   0   -4.60    8.10
  -8 -15   0  -12.70   16.40
  -8 -15   0    9.30   10.10
  -9 -15   0    9.20   17.40
  -9 -15   0  -18.40    7.50
   7 -16   0   13.40   15.80
  -7  16   0  -11.20    8.90
   6 -16   0   22.70   17.90
  -6  16   0   12.30   12.70
   5 -16   0   14.90   20.80
  -5  16   0   32.20   15.60
   4 -16   0    9.70   15.40
   3 -16   0   21.50   16.90
   2 -16   0   12.30   15.50
   1 -16   0   87.09   38.10
   0 -16   0   29.80   18.20
  -1 -16   0   55.89   27.40
  -2 -16   0   38.50   25.30
  -2 -16   0   67.59   26.10
  -3 -16   0   -9.30   14.80
  -3 -16   0   18.10   21.30
  -4 -16   0    2.60   17.80
  -4 -16   0    2.30    9.30
  -5 -16   0   55.99   21.50
  -5 -16   0   16.50   23.30
  -6 -16   0   10.90   12.60
  -6 -16   0   20.60   22.00
  -7 -16   0    4.30    9.90
  -7 -16   0  -13.90   18.40
  -4  17   0   -2.20   10.20
   3 -17   0    6.80   17.10
   2 -17   0   -4.10   17.40
   1 -17   0   17.30   17.00
   0 -17   0  -22.80   10.10
  -1 -17   0  -18.00   10.00
  -2 -17   0    4.60   14.40
  -3 -17   0   12.90   13.00
  -3 -17   0  -30.60   19.00
  -4 -17   0  -20.90   10.10
  -4 -17   0  -15.60   20.90
  -4 -17   1   -5.00   20.70
  -4 -17   1    1.20   12.20
  -3 -17   1   -1.10   12.60
  -3 -17   1   -2.20   19.60
  -2 -17   1    8.90   15.30
  -1 -17   1   28.60   18.20
   0 -17   1    1.70   12.20
   1 -17   1   16.50   18.20
   2 -17   1    8.20   19.30
  -4  17  -1   -1.30   12.40
  -7 -16   1   79.89   39.70
  -6 -16   1   11.20   18.90
  -6 -16   1   12.00   12.10
  -5 -16   1   13.50   14.00
  -5 -16   1   16.50   18.50
  -4 -16   1   29.20   22.00
  -4 -16   1   -7.50    9.70
  -3 -16   1    8.40   16.80
  -3 -16   1   19.20   16.50
  -2 -16   1   16.20   19.70
  -2 -16   1   58.29   20.90
  -1 -16   1    6.50   14.30
   0 -16   1   60.39   27.60
   1 -16   1   13.00   14.60
   2 -16   1   36.40   20.30
   3 -16   1   16.10   15.80
  -4  16  -1   -7.00    9.30
   4 -16   1    0.30   14.50
  -5  16  -1   -0.60   11.60
   5 -16   1   47.70   20.90
  -6  16  -1    0.50   10.60
   6 -16   1   23.40   18.90
  -7  16  -1   -1.90    9.30
   7 -16   1   17.90   17.60
  -9 -15   1   -0.40   17.90
  -9 -15   1    8.10   10.90
  -8 -15   1    3.90    9.20
  -8 -15   1   -0.20   15.10
  -7 -15   1   -7.10    9.60
  -7 -15   1    4.40   17.30
  -6 -15   1   44.70   26.30
  -5 -15   1   48.70   20.20
  -5 -15   1   -4.20    9.10
  -4 -15   1    6.20   12.70
  -4 -15   1   11.30   17.00
  -3 -15   1   13.70   13.50
  -3 -15   1    0.00   15.40
  -2 -15   1    5.00   10.30
  -2 -15   1   16.30   13.00
  -1 -15   1   22.10   16.40
   0 -15   1  -13.60   11.80
   1 -15   1   -1.60   10.50
   2 -15   1  -10.30   11.20
   3 -15   1   -6.40   11.70
   4 -15   1  -20.10   11.00
   5 -15   1   -3.60   12.50
  -6  15  -1    6.50   11.70
   6 -15   1   38.20   19.10
  -7  15  -1    2.60    9.20
   7 -15   1  -16.20   13.50
  -8  15  -1    8.80   11.80
   8 -15   1    8.50   16.10
   9 -15   1    5.00   18.70
 -10 -14   1    7.20   19.80
 -10 -14   1   -3.60    7.30
  -9 -14   1   28.00   16.30
  -9 -14   1   33.10   25.50
  -8 -14   1  -16.90   15.80
  -7 -14   1   11.40   15.80
  -7 -14   1   19.20   12.80
  -6 -14   1   38.20   17.70
  -6 -14   1   -3.10   11.30
  -5 -14   1   10.40   11.60
  -4 -14   1   46.40   21.50
  -4 -14   1   20.70   16.30
  -3 -14   1   29.20   18.50
  -3 -14   1   31.60   19.00
  -2 -14   1    7.40   11.80
  -1 -14   1   15.60   11.50
  -1 -14   1   18.80   14.30
   0 -14   1   -8.40   11.00
   1 -14   1    0.40   12.20
   2 -14   1   24.20   16.60
   3 -14   1   43.20   22.90
   4 -14   1   36.80   20.10
  -5  14  -1    7.50    9.60
   5 -14   1   -9.70   11.70
  -6  14  -1    4.40   11.10
   6 -14   1   10.70   13.60
  -7  14  -1   10.20   11.40
   7 -14   1   17.90   13.60
  -8  14  -1   10.90   12.00
   8 -14   1   20.20   16.00
  -9  14  -1   21.40   13.50
   9 -14   1   22.90   16.90
 -10  14  -1   19.20   13.50
  10 -14   1   30.90   18.50
 -10 -13   1   -1.90   16.60
 -10 -13   1   23.50   12.10
  -9 -13   1   14.70   17.90
  -9 -13   1   -2.40    7.60
  -8 -13   1    8.70   10.10
  -8 -13   1    9.60   14.40
  -7 -13   1    9.90   10.70
  -7 -13   1   15.10   19.50
  -6 -13   1  -16.10   13.50
  -6 -13   1   -5.40    7.20
  -5 -13   1   -3.20    8.80
  -5 -13   1   -7.00   13.00
  -4 -13   1   29.00   17.20
  -4 -13   1   -4.80    9.80
  -3 -13   1  -19.90    8.10
  -3 -13   1   -9.10   10.50
  -2 -13   1   -9.40   10.20
  -2 -13   1    3.00   11.30
  -1 -13   1   53.09   25.80
   0 -13   1   -5.70    9.90
   1 -13   1   -7.90   11.40
   2 -13   1  -12.30   11.10
   3 -13   1  -17.50    9.10
   4 -13   1   -7.00   11.60
  -5  13  -1  -11.40    7.60
   5 -13   1   -5.60   10.50
  -6  13  -1    3.00    9.60
   6 -13   1   19.10   13.50
  -7  13  -1    9.60    9.50
   7 -13   1   -0.10   10.70
  -8  13  -1   -6.30    9.40
   8 -13   1   -5.60   13.00
  -9  13  -1   -4.10   10.50
   9 -13   1   13.30   12.90
 -10  13  -1    4.00    9.30
  10 -13   1   13.90   15.70
 -11  13  -1  -14.90    9.10
  11 -13   1   28.60   19.80
 -12 -12   1   47.80   28.70
 -11 -12   1   23.90   21.10
 -10 -12   1   25.60   14.50
 -10 -12   1   37.00   25.00
  -9 -12   1   -7.00    6.20
  -9 -12   1    7.50   15.00
  -8 -12   1   10.40   10.00
  -8 -12   1   -0.60   14.60
  -7 -12   1    4.70   14.50
  -7 -12   1   -4.20    8.30
  -6 -12   1   31.30   17.20
  -6 -12   1   32.70   20.40
  -5 -12   1   16.50   14.90
  -5 -12   1   21.70   13.30
  -4 -12   1  124.89   52.19
  -4 -12   1  131.09   51.09
  -3 -12   1   30.30   18.10
  -3 -12   1   42.00   20.40
  -2 -12   1   -0.30    9.50
  -2 -12   1   37.00   14.60
  -1 -12   1   22.10   14.70
  -1 -12   1   38.50   17.30
   0 -12   1   82.69   35.70
   0 -12   1  126.49   43.80
  -1  12  -1   29.40   14.20
   1 -12   1   19.80   16.30
   2 -12   1   11.80   13.10
   3 -12   1   17.50   14.30
   4 -12   1  123.09   49.80
  -5  12  -1    8.90   10.10
   5 -12   1   16.90   13.00
  -6  12  -1   17.70   13.30
   6 -12   1   31.20   16.50
  -7  12  -1   10.90    9.20
   7 -12   1    7.50   17.10
  -8  12  -1    1.40   10.40
   8 -12   1   24.80   14.20
  -9  12  -1    6.00    9.90
   9 -12   1   13.80   14.50
 -10  12  -1   10.40   10.30
  10 -12   1   11.40   14.10
 -11  12  -1   -4.40   10.10
  11 -12   1   27.90   15.60
 -12  12  -1   25.80   15.80
  12 -12   1   39.60   21.20
 -13 -11   1   36.70   24.40
 -12 -11   1   33.70   25.90
 -11 -11   1    4.40   16.00
 -10 -11   1   18.10   17.80
  -9 -11   1  -12.20    6.50
  -9 -11   1    1.80   15.40
  -8 -11   1    4.60   15.50
  -8 -11   1    9.80    8.60
  -7 -11   1    8.60    9.50
  -7 -11   1   13.50   15.50
  -6 -11   1    2.70   12.50
  -6 -11   1    5.70    8.80
  -5 -11   1   -2.90   12.40
  -5 -11   1    7.00    8.70
   4  11  -1   13.60   23.40
  -4 -11   1   -0.10    8.60
  -4 -11   1   -3.50   11.20
  -3 -11   1   28.10   15.50
  -3 -11   1    8.20   12.40
  -2 -11   1    2.70   10.20
  -2 -11   1   -2.50    8.50
  -1 -11   1   -2.00    9.30
  -1 -11   1   -4.50    7.90
   0  11  -1    1.90    9.70
   0 -11   1   15.00    7.50
   0 -11   1   -6.30   10.50
  -1  11  -1    5.80    6.40
   1 -11   1   -6.90    9.10
   2 -11   1  -22.70    8.40
   3 -11   1   17.30   12.70
   4 -11   1    3.90   10.20
  -5  11  -1    3.00    7.80
   5 -11   1   -5.00   10.10
  -6  11  -1   20.30   11.70
   6 -11   1   17.50   13.00
  -7  11  -1   -3.30    7.90
   7 -11   1    9.40   11.00
  -8  11  -1   -3.80    8.60
   8 -11   1   15.80   12.60
  -9  11  -1    5.70    9.90
   9 -11   1   23.40   13.00
 -10  11  -1   -5.90    9.00
  10 -11   1   11.70   11.70
 -11  11  -1    7.20   11.60
  11 -11   1   36.60   17.60
 -12  11  -1   10.50   10.90
  12 -11   1   19.40   16.10
 -13  11  -1   13.50   13.50
  13 -11   1   53.49   21.00
 -14 -10   1   14.20   20.00
 -13 -10   1   -0.40   15.60
 -12 -10   1   13.00   20.60
 -11 -10   1   -9.00   15.00
 -10 -10   1   10.20   14.80
  -9 -10   1   42.30   22.50
  -9 -10   1   28.90   15.70
  -8 -10   1   36.40   18.10
  -8 -10   1   51.29   24.10
  -7 -10   1   68.69   32.10
  -7 -10   1   97.59   36.50
  -6 -10   1   37.10   15.20
  -6 -10   1   18.80   18.00
  -5 -10   1    0.60   12.10
  -5 -10   1    3.50    7.90
  -4 -10   1    5.90    8.40
  -4 -10   1    9.40   11.60
  -3 -10   1    6.80   10.50
  -3 -10   1    5.90    9.50
  -2 -10   1  191.58   70.19
  -2 -10   1  177.18   69.39
  -1 -10   1  153.18   59.49
   0  10  -1   -6.70    6.90
   0 -10   1   -3.30    6.90
   0 -10   1   -1.60    9.30
  -1  10  -1  165.18   62.19
   1 -10   1  162.78   63.89
  -2  10  -1  165.98   64.39
   2 -10   1  185.68   65.49
   3 -10   1   -0.80    9.20
   4 -10   1   22.40   13.90
  -5  10  -1   13.70    8.90
   5 -10   1   -4.70    8.50
  -6  10  -1   15.00   10.90
   6 -10   1   26.20   13.80
   7 -10   1  116.59   46.70
  -8  10  -1   36.80   20.90
   8 -10   1   66.69   23.40
  -9  10  -1   18.70   14.60
   9 -10   1   50.79   17.80
 -10  10  -1   13.00   10.70
  10 -10   1   13.10   12.10
 -11  10  -1   15.80   13.50
 -11  10  -1   12.10   11.50
  11 -10   1   31.10   15.50
 -12  10  -1   -6.30    9.30
 -12  10  -1   -0.30    8.20
  12 -10   1    9.90   12.90
 -13  10  -1    1.50   10.50
 -13  10  -1   28.20   14.60
  13 -10   1   17.40   15.70
 -14  10  -1    8.80   11.30
  14 -10   1   48.20   20.50
 -14  -9   1    7.80   19.50
 -14  -9   1    2.90    8.50
 -13  -9   1    0.40   19.20
 -13  -9   1    9.00    9.30
 -12  -9   1   -5.40    7.40
 -12  -9   1   -0.10   15.80
 -11  -9   1    3.00   20.00
 -11  -9   1   30.10   12.00
 -10  -9   1  -11.10    5.60
 -10  -9   1    2.60   14.40
  -9  -9   1   15.30   13.70
  -9  -9   1   -5.10    6.10
  -8  -9   1   -9.10   22.80
  -8  -9   1   -6.20    6.20
  -7  -9   1   -5.20   10.30
  -6  -9   1    1.70   11.40
  -6  -9   1    4.10    7.30
  -5  -9   1   -7.10    6.60
  -5  -9   1   -3.00   10.00
   4   9  -1    6.90   13.80
  -4  -9   1    0.90    9.50
  -4  -9   1    1.50    6.90
   3   9  -1   12.40   14.70
  -3  -9   1    6.30   10.30
  -3  -9   1    7.70    8.40
  -2  -9   1   -1.10    6.80
  -2  -9   1   -5.20    6.60
  -1  -9   1   -5.30    6.90
  -1  -9   1    9.90    8.50
   0   9  -1   -0.60    5.80
   0  -9   1   -5.60    5.00
   0  -9   1    3.00    8.40
  -1   9  -1    5.50    5.60
   1  -9   1   -1.40    5.10
   1  -9   1   13.90    9.10
  -2   9  -1    8.60    5.80
   2  -9   1   -9.20    7.20
   3  -9   1   -6.00    7.30
   4  -9   1   -5.90    8.00
  -5   9  -1   -2.90    6.50
   5  -9   1    6.30    8.60
  -6   9  -1   -5.00    6.80
   6  -9   1   -6.50    8.50
  -7   9  -1   -4.60    6.40
   7  -9   1    2.60    8.50
  -8   9  -1    3.10    7.60
  -8   9  -1   12.70    5.90
  -8   9  -1   -6.10    7.00
   8  -9   1  -17.90    6.70
  -9   9  -1   10.80    9.60
  -9   9  -1   17.40   11.40
   9  -9   1    1.60   10.10
 -10   9  -1  -18.80    7.20
 -10   9  -1   20.20   11.00
  10  -9   1  -17.60    9.60
 -11   9  -1    8.70   10.90
 -11   9  -1    2.80    8.60
  11  -9   1   -7.10   10.30
 -12   9  -1   14.50   14.00
 -12   9  -1   -0.40    8.70
  12  -9   1   16.40   11.90
 -13   9  -1  -18.00    6.70
 -13   9  -1   18.60   14.40
  13  -9   1   21.40   12.70
 -14   9  -1    5.80   12.60
 -14   9  -1   71.29   22.30
  14  -9   1   22.60   18.10
 -15  -8   1   46.70   14.10
 -15  -8   1   -2.70   18.80
 -14  -8   1   50.99   22.60
 -14  -8   1   57.99   38.00
 -13  -8   1   13.50   18.90
 -13  -8   1    8.80    8.60
 -12  -8   1   36.90   14.80
 -12  -8   1   18.50   21.20
 -11  -8   1   71.69   26.60
 -11  -8   1   26.10   15.80
 -10  -8   1  147.39   47.10
 -10  -8   1   86.29   38.70
  -9  -8   1   48.20   20.50
  -9  -8   1   42.60   14.40
  -9  -8   1   10.10   12.20
  -8  -8   1   33.50   15.70
  -8  -8   1   57.99   21.90
  -8  -8   1   26.70   15.30
  -7  -8   1    9.80    8.00
  -7  -8   1    8.80   12.00
  -6  -8   1   27.00   19.10
  -6  -8   1   46.30   17.30
  -5  -8   1  243.58   82.09
  -5  -8   1  196.28   80.79
   4   8  -1  115.09   52.79
  -4  -8   1  160.18   52.79
  -4  -8   1  165.68   53.89
   3   8  -1   44.60   17.20
  -3  -8   1   14.90   13.00
  -3  -8   1   25.30   14.30
   2   8  -1  124.19   56.89
  -2  -8   1  160.48   56.29
  -2  -8   1  194.88   59.29
   1   8  -1  209.28   79.69
  -1  -8   1  217.18   79.69
  -1  -8   1  209.78   79.69
   0   8  -1   35.60   16.80
   0  -8   1   38.90   16.70
   0  -8   1   42.90   17.60
  -1   8  -1  204.58   73.59
   1  -8   1  183.48   73.29
   1  -8   1  211.38   73.99
  -2   8  -1  164.78   63.79
   2  -8   1  183.28   64.49
  -3   8  -1   12.90    8.10
   3  -8   1   28.30   11.40
   4  -8   1  178.98   67.69
  -5   8  -1  248.38   80.39
  -5   8  -1  203.68   80.19
  -5   8  -1  199.98   80.79
   5  -8   1  193.68   80.89
  -6   8  -1   31.80   14.40
  -6   8  -1   30.70   12.90
  -6   8  -1   26.30   13.80
   6  -8   1   38.50   15.80
  -7   8  -1    5.40    9.00
  -7   8  -1   36.10   10.60
   7  -8   1   13.40   10.60
  -8   8  -1   22.70   15.20
  -8   8  -1   33.90   16.40
   8  -8   1   41.70   16.60
  -9   8  -1   37.60   17.10
  -9   8  -1   43.30   19.60
   9  -8   1   34.00   17.90
 -10   8  -1  121.39   45.80
 -10   8  -1   90.79   44.10
  10  -8   1  130.09   45.50
 -11   8  -1   25.30   16.30
 -11   8  -1   48.70   20.00
  11  -8   1   32.40   17.80
 -12   8  -1   48.30   20.40
 -12   8  -1   20.80   13.50
  12  -8   1   18.60   15.50
 -13   8  -1   -5.30    9.20
 -13   8  -1   13.80   14.40
  13  -8   1   34.10   14.60
 -14   8  -1   51.99   35.50
 -14   8  -1   73.29   36.00
  14  -8   1  110.39   35.10
 -15   8  -1    0.10   10.80
 -15   8  -1   24.40   16.20
  15  -8   1   18.20   17.20
 -15  -7   1   -1.30   18.70
 -15  -7   1   26.70   10.60
 -14  -7   1   -6.70   15.60
 -14  -7   1    0.40    7.50
 -13  -7   1   -7.10    6.00
 -13  -7   1   -2.10   14.10
 -12  -7   1   14.80   16.00
 -12  -7   1   -5.40    5.60
 -11  -7   1   15.00   16.70
 -11  -7   1   -1.50    5.90
 -10  -7   1   -5.20    5.40
 -10  -7   1   16.30   15.10
  -9  -7   1   20.20   17.00
  -8  -7   1   -2.00    5.50
  -8  -7   1    4.30    5.80
  -8  -7   1  -10.20    9.20
  -7  -7   1   -3.60    4.90
  -7  -7   1   -0.70    5.30
  -7  -7   1  -10.70    9.10
  -6  -7   1   -0.20    5.50
  -6  -7   1   -8.00    7.20
  -6  -7   1   -2.80    4.70
  -5  -7   1   -7.90    5.60
  -5  -7   1   -7.80    7.40
  -4  -7   1   -7.50    7.50
  -4  -7   1   -6.30    5.20
   3   7  -1    7.60   10.20
  -3  -7   1   -0.40    5.60
  -3  -7   1    6.50    8.10
  -2  -7   1    7.50    7.40
  -2  -7   1    2.40    6.90
   1   7  -1   -4.50   11.50
   1   7  -1    0.10    6.30
  -1  -7   1    1.50    6.00
  -1  -7   1   -1.50    5.70
   0   7  -1   -0.20    5.40
   0  -7   1    0.40    6.40
   0  -7   1   -5.70    5.10
  -1   7  -1   -0.50    5.10
   1  -7   1    1.00    4.30
   1  -7   1   -5.80    6.20
  -2   7  -1   -8.20    4.00
   2  -7   1    1.70    6.00
  -3   7  -1   -2.60    3.80
   3  -7   1  -15.10    4.90
  -4   7  -1    4.50    5.90
  -4   7  -1   -4.00    4.10
   4  -7   1   -5.00    6.00
  -5   7  -1    5.80    5.40
  -5   7  -1   -3.10    4.00
  -5   7  -1    4.30    6.30
   5  -7   1   -0.20    6.80
  -6   7  -1    3.60    6.30
  -6   7  -1   10.00    6.80
   6  -7   1   -2.10    6.50
  -7   7  -1    1.20    8.20
  -7   7  -1    7.60    7.50
   7  -7   1    6.00    7.90
  -8   7  -1    5.40    7.30
  -8   7  -1    7.60    9.00
   8  -7   1    2.30    8.30
  -9   7  -1   -4.20   10.00
  -9   7  -1    3.80    8.00
   9  -7   1   -1.90    7.40
 -10   7  -1   16.30   11.00
 -10   7  -1    3.00    7.60
  10  -7   1   -0.20    9.30
 -11   7  -1    7.90    7.90
 -11   7  -1    6.40   10.30
  11  -7   1    2.30    9.70
 -12   7  -1    1.80   13.40
 -12   7  -1  -11.30    7.30
  12  -7   1    3.00   10.00
 -13   7  -1   20.90   16.90
 -13   7  -1   10.40   11.80
  13  -7   1   21.20   13.80
 -14   7  -1  -11.40    9.20
 -14   7  -1   -7.00   14.90
  14  -7   1   -3.60   11.20
 -15   7  -1  -11.70    9.70
 -15   7  -1   36.40   17.00
  15  -7   1  -11.50   15.90
 -16  -6   1   68.89   26.40
 -16  -6   1   56.89   34.40
 -15  -6   1   32.50   11.40
 -15  -6   1   -8.10   18.10
 -14  -6   1   69.59   27.10
 -14  -6   1   60.99   33.90
 -13  -6   1    8.90    7.50
 -13  -6   1    5.40   17.10
 -12  -6   1   -1.30    5.90
 -12  -6   1   20.30   18.10
 -11  -6   1   26.30   18.80
 -11  -6   1   12.30    8.40
 -10  -6   1   59.39   25.20
 -10  -6   1   76.89   32.20
  -9  -6   1   15.10   14.60
  -9  -6   1   18.20    9.00
  -8  -6   1   15.60    8.40
  -8  -6   1   14.80   14.20
  -7  -6   1   56.29   18.20
  -7  -6   1   31.20   16.90
  -7  -6   1   43.90   21.00
  -6  -6   1  314.27  101.89
  -6  -6   1  250.67  100.19
  -6  -6   1  262.37   99.99
  -5  -6   1  225.78   81.39
  -5  -6   1  225.38   80.09
  -5  -6   1  197.88   79.79
  -4  -6   1   72.79   26.00
  -4  -6   1   55.89   26.60
   3   6  -1  213.78   88.39
  -3  -6   1  248.28   88.39
  -3  -6   1  268.97   89.09
   2   6  -1  129.49   50.29
   2   6  -1  136.99   50.89
  -2  -6   1  124.29   50.19
  -2  -6   1  128.99   49.80
  -1  -6   1  264.87  100.49
  -1  -6   1  274.97  100.49
   0   6  -1    8.00   13.90
   0   6  -1    9.30    7.40
   0  -6   1    5.00   12.40
   0  -6   1   15.20    7.80
  -1   6  -1  263.37   97.59
   1  -6   1  261.67   97.49
   1  -6   1  263.07   97.99
  -2   6  -1  116.19   44.90
   2  -6   1  127.49   45.50
  -3   6  -1  284.57  106.99
   3  -6   1  294.97  107.39
  -4   6  -1   51.89   23.90
  -4   6  -1   64.49   23.50
   4  -6   1   59.29   24.40
  -5   6  -1  237.48   88.79
  -5   6  -1  260.27   88.69
   5  -6   1  200.08   89.09
  -6   6  -1  250.87   95.99
  -6   6  -1  256.47   96.09
   6  -6   1  263.17   95.99
  -7   6  -1   19.00   15.20
  -7   6  -1   39.70   17.30
   7  -6   1   61.09   17.00
  -8   6  -1   19.80   10.70
  -8   6  -1   14.10   12.20
   8  -6   1   26.30   11.60
  -9   6  -1   24.30   14.60
  -9   6  -1   18.40   11.00
   9  -6   1   21.90   11.70
 -10   6  -1   56.59   29.20
 -10   6  -1   99.29   33.10
  10  -6   1   77.79   30.40
 -11   6  -1   -3.20    7.60
 -11   6  -1   12.40   14.80
  11  -6   1   31.70   11.10
 -12   6  -1   13.30    9.20
 -12   6  -1   12.80   13.50
  12  -6   1    0.80    9.80
 -13   6  -1   25.70   18.30
 -13   6  -1   20.20   12.00
  13  -6   1   24.50   13.40
 -14   6  -1   71.19   29.50
 -14   6  -1   66.59   34.10
  14  -6   1   74.59   30.30
 -15   6  -1   36.60   19.70
 -15   6  -1   19.20   13.90
  15  -6   1   12.60   14.30
 -16   6  -1   69.79   29.00
 -16   6  -1   34.50   22.30
  16  -6   1   59.99   25.80
 -16  -5   1   10.20    7.40
 -16  -5   1  -18.20   13.30
 -15  -5   1    2.80   16.40
 -15  -5   1    8.10    7.70
 -14  -5   1   23.50   20.90
 -14  -5   1    5.30    7.00
 -13  -5   1   11.10    7.50
 -13  -5   1    3.50   16.90
 -12  -5   1   11.10    7.50
 -11  -5   1  -10.50    5.00
 -11  -5   1   -8.00   10.00
 -10  -5   1    5.60   14.50
 -10  -5   1   -4.90    4.80
  -9  -5   1   15.00   13.50
  -9  -5   1    1.50    5.20
  -8  -5   1   -0.80    4.30
  -8  -5   1   -6.30    9.10
  -7  -5   1    0.40    4.40
  -7  -5   1   -5.00    8.00
  -7  -5   1   -2.10    4.10
  -6  -5   1    6.50    9.00
  -6  -5   1    2.00    4.50
  -6  -5   1   -6.00    3.90
  -5  -5   1   13.50    9.20
  -5  -5   1   -4.00    3.80
  -5  -5   1   -5.20    4.00
  -4  -5   1    4.30    8.10
  -4  -5   1   -4.70    4.60
  -4  -5   1    8.50    5.80
   3   5  -1    6.50    7.30
   3   5  -1    8.70    7.70
  -3  -5   1    3.50    6.00
  -3  -5   1    2.20    7.30
   2   5  -1    2.00    3.10
   2   5  -1    2.50    6.30
   2   5  -1   -1.20    9.20
  -2  -5   1    0.30    6.10
  -2  -5   1    0.40    6.20
   1   5  -1    6.50    6.30
   1   5  -1   -8.60   10.70
   1   5  -1    0.30    5.60
  -1  -5   1   -2.60    5.80
  -1  -5   1   -0.60    5.60
   0   5  -1   -1.20    5.00
   0   5  -1  -10.90   11.20
   0   5  -1    0.80    5.00
   0  -5   1    2.20    5.20
   0  -5   1    2.00    6.00
  -1   5  -1    9.20    6.00
  -1   5  -1   -1.20   13.10
  -1   5  -1   -2.50    4.50
   1  -5   1   -6.30    5.50
   1  -5   1   -0.50    3.90
  -2   5  -1    2.10    4.30
  -2   5  -1   -9.40   13.80
  -2   5  -1   -5.50    5.10
   2  -5   1    3.60    6.20
  -3   5  -1    2.40    4.30
  -3   5  -1    1.30    4.80
   3  -5   1    0.80    5.70
  -4   5  -1   -5.20    4.40
  -4   5  -1    8.10    5.80
  -4   5  -1    8.40    5.50
   4  -5   1   -0.10    5.60
  -5   5  -1   -4.50    5.30
  -5   5  -1    2.70    5.10
  -5   5  -1    4.70    4.60
   5  -5   1   -7.20    4.60
  -6   5  -1   -1.20    6.50
  -6   5  -1   -1.10    5.20
   6  -5   1    2.70    5.30
  -7   5  -1   -1.80    5.60
  -7   5  -1  -11.20    6.90
  -8   5  -1   -2.40    5.10
  -8   5  -1    5.00    8.80
   8  -5   1    2.50    6.20
  -9   5  -1    7.50   10.40
  -9   5  -1   -2.70    5.70
   9  -5   1   -5.80    6.70
 -10   5  -1   -4.70    7.60
  10  -5   1    5.00    7.20
 -11   5  -1   13.20   12.80
 -11   5  -1    8.30    7.50
  11  -5   1    3.50    8.50
 -12   5  -1  -26.60   11.80
 -12   5  -1   -1.00    7.60
  12  -5   1    4.50    8.60
 -13   5  -1   -0.70    8.00
 -13   5  -1  -16.70   10.60
  13  -5   1    5.10    8.90
 -14   5  -1    1.60    9.20
 -14   5  -1  -29.20   11.10
  14  -5   1   42.90   12.70
 -15   5  -1    2.40    9.60
 -15   5  -1   21.90   17.50
  15  -5   1   16.20   12.40
 -16   5  -1  -16.10    9.80
 -16   5  -1   23.20   18.10
  16  -5   1   55.59   19.50
 -16  -4   1   48.70   17.70
 -16  -4   1   21.10   24.80
 -15  -4   1   37.10   28.40
 -15  -4   1   42.20   17.90
 -14  -4   1   63.99   22.50
 -14  -4   1   33.40   28.40
 -13  -4   1   37.30   22.10
 -13  -4   1   26.60   12.90
 -12  -4   1   15.00    7.60
 -12  -4   1    8.20   16.30
 -11  -4   1   25.50   11.50
 -11  -4   1   26.00   18.80
 -10  -4   1   57.09   23.80
 -10  -4   1   75.79   30.50
  -9  -4   1   27.50   18.50
  -9  -4   1   24.50   10.90
  -8  -4   1    9.10    6.20
  -8  -4   1   18.30   12.80
  -7  -4   1   11.60    6.30
  -7  -4   1   11.60   11.40
  -6  -4   1   59.99   24.40
  -6  -4   1   67.19   24.10
  -6  -4   1   56.99   27.00
  -5  -4   1  149.49   42.80
  -5  -4   1   91.89   38.70
  -5  -4   1  102.29   38.50
   4   4  -1  242.68   87.29
  -4  -4   1  226.48   87.59
  -4  -4   1  244.28   88.49
  -4  -4   1  227.48   87.59
   3   4  -1    0.00    2.80
   3   4  -1   -5.10    6.40
   3   4  -1   -0.20    5.10
  -3  -4   1   10.50    7.60
  -3  -4   1    3.50    5.40
  -3  -4   1   -1.30    3.90
   2   4  -1  166.08   57.79
   2   4  -1  134.79   57.69
   2   4  -1  160.08   57.19
   2   4  -1  145.99   58.09
  -2  -4   1  171.98   57.99
  -2  -4   1  154.18   57.59
   1   4  -1  148.09   51.79
   1   4  -1  100.49   52.19
   1   4  -1  150.48   52.09
  -1  -4   1  147.49   51.99
  -1  -4   1  151.78   51.79
   0   4  -1  380.56  143.19
   0   4  -1  382.26  143.29
   0  -4   1  392.86  143.19
   0  -4   1  389.16  143.29
  -1   4  -1  174.68   58.89
  -1   4  -1  142.99   58.99
  -1   4  -1  162.88   62.09
   1  -4   1  153.58   59.09
   1  -4   1  153.38   58.69
  -2   4  -1  146.59   58.39
  -2   4  -1  118.59   61.39
  -2   4  -1  166.68   58.19
   2  -4   1  165.28   58.49
  -3   4  -1   -2.30    4.50
  -3   4  -1    1.70   14.40
  -3   4  -1    1.10    4.80
   3  -4   1    3.50    5.30
  -4   4  -1  239.38   86.39
  -4   4  -1  256.87   87.39
  -4   4  -1  224.18   86.39
   4  -4   1  218.08   86.29
  -5   4  -1  123.19   42.50
  -5   4  -1  102.69   43.20
   5  -4   1  111.19   42.30
  -6   4  -1   53.49   19.80
  -6   4  -1   32.50   17.80
   6  -4   1   49.99   18.30
  -7   4  -1   10.20   11.40
  -7   4  -1   24.20    9.90
   7  -4   1   26.90   10.70
  -8   4  -1   19.30   11.70
  -8   4  -1   17.10    8.60
   8  -4   1   16.00    9.50
  -9   4  -1   21.60    8.90
  -9   4  -1    4.90   11.60
   9  -4   1   16.20    9.00
 -10   4  -1   53.09   24.90
 -10   4  -1   74.69   28.90
  10  -4   1   66.59   25.90
 -11   4  -1   29.40   17.20
 -11   4  -1   27.30   12.10
  11  -4   1   17.90   13.00
 -12   4  -1    3.90   15.70
 -12   4  -1   13.80    9.30
  12  -4   1   21.30   11.60
 -13   4  -1   -5.80   26.50
 -13   4  -1   26.40   12.50
  13  -4   1   26.50   13.80
 -14   4  -1   34.40   22.70
 -14   4  -1   86.09   32.20
  14  -4   1   80.49   25.20
 -15   4  -1   40.70   26.60
 -15   4  -1   52.59   21.50
  15  -4   1   52.49   24.10
 -16   4  -1   10.40   14.30
 -16   4  -1   53.09   22.40
  16  -4   1   -9.30   12.90
 -17  -3   1   -2.00   14.60
 -16  -3   1  -22.90   18.20
 -16  -3   1   28.50    9.40
 -15  -3   1   18.70    7.90
 -15  -3   1    0.20   17.30
 -14  -3   1   13.50   16.10
 -14  -3   1   19.40    9.00
 -13  -3   1   10.50   16.30
 -13  -3   1   12.40    7.10
 -12  -3   1  -20.20   11.00
 -12  -3   1   -1.00    4.20
 -11  -3   1    2.00    4.70
 -10  -3   1    0.30   10.40
 -10  -3   1   -7.00    3.30
  -9  -3   1   12.60    9.40
  -9  -3   1  -11.50   10.20
  -9  -3   1   -6.70    3.00
  -8  -3   1    0.50    8.70
  -8  -3   1   -4.00    3.10
  -7  -3   1   -1.40    3.40
  -7  -3   1   12.60    9.20
  -6  -3   1   -6.50    7.30
  -6  -3   1   -3.50    3.30
   5   3  -1    0.80    3.50
  -5  -3   1   -3.10    8.30
  -5  -3   1   -1.30    3.30
   4   3  -1    2.20    4.30
   4   3  -1    1.30    6.60
   4   3  -1    1.20    2.70
  -4  -3   1   -1.30    3.80
  -4  -3   1   -5.60    3.30
  -4  -3   1   -4.60    6.90
   3   3  -1   -7.70    4.50
   3   3  -1   -5.80    6.10
   3   3  -1    0.90    2.90
  -3  -3   1    5.90    4.90
  -3  -3   1   -0.40    6.90
  -3  -3   1    1.10    3.50
   2   3  -1   -3.00    3.00
   2   3  -1   -4.20    5.00
   2   3  -1    1.60    6.10
  -2  -3   1    7.20    6.40
  -2  -3   1   -2.80    3.50
  -2  -3   1   -8.60    4.10
   1   3  -1   -1.70    9.30
   1   3  -1    3.80    5.70
   1   3  -1    2.50    4.80
  -1  -3   1    1.20    5.20
  -1  -3   1   -1.70    4.70
   0   3  -1   -1.70    4.30
   0   3  -1    5.20    4.90
   0   3  -1    5.00   11.70
   0  -3   1   -8.70    4.20
   0  -3   1   -1.30    3.90
  -1   3  -1   -2.60    4.10
  -1   3  -1    0.30    3.90
  -1   3  -1    5.20   12.20
   1  -3   1   -5.70    4.50
  -2   3  -1    1.80   12.20
  -2   3  -1    1.80    4.50
   2  -3   1    1.40    4.70
  -3   3  -1   12.00   15.40
  -3   3  -1   -0.80    4.40
  -3   3  -1    2.20    4.60
   3  -3   1    5.60    4.80
  -4   3  -1   29.10   16.50
  -4   3  -1    1.90    6.00
  -4   3  -1    2.30    4.90
   4  -3   1    2.50    5.00
  -5   3  -1    1.80    4.60
  -5   3  -1    0.60    6.20
   5  -3   1   -0.20    4.60
  -6   3  -1   -3.20    6.90
  -6   3  -1    0.30    4.20
   6  -3   1    4.50    4.50
  -7   3  -1    2.50    8.60
  -7   3  -1   -6.40    3.90
   7  -3   1    4.90    4.50
  -8   3  -1   -1.30    4.00
  -8   3  -1   -1.20    7.30
   8  -3   1    2.90    5.10
  -9   3  -1   -0.30    4.50
  -9   3  -1   14.40   11.00
   9  -3   1   -4.20    4.80
 -10   3  -1  -19.80    5.50
 -10   3  -1   -8.30    8.90
  10  -3   1    7.10    6.20
 -11   3  -1    5.10   13.30
  11  -3   1   -5.00    5.40
 -12   3  -1   14.20    7.60
 -12   3  -1   -1.00   12.40
  12  -3   1   -7.10    6.70
 -13   3  -1  -21.30   11.40
 -13   3  -1   16.70    7.60
  13  -3   1    7.20    8.40
 -14   3  -1   -4.60    7.90
 -14   3  -1   -6.40   15.30
  14  -3   1   31.40   10.10
 -15   3  -1  -13.00    8.30
 -15   3  -1    2.60   15.70
  15  -3   1    0.50   11.60
 -16   3  -1    1.10   15.30
 -16   3  -1    4.50   10.10
  16  -3   1   20.70   12.30
 -17   3  -1  -20.60    9.60
 -17   3  -1   23.90   20.10
  17  -3   1  -16.10   13.50
 -17  -2   1   19.20   19.90
 -16  -2   1  126.19   44.80
 -16  -2   1   82.69   52.29
 -15  -2   1   55.29   40.90
 -15  -2   1   96.89   33.80
 -14  -2   1   38.90   15.00
 -14  -2   1   23.60   22.80
 -13  -2   1   95.19   37.30
 -13  -2   1  103.19   44.60
 -12  -2   1  146.69   58.09
 -12  -2   1  209.48   67.19
 -11  -2   1   85.99   37.40
 -11  -2   1   80.19   31.30
 -10  -2   1  107.99   40.70
 -10  -2   1  106.29   45.10
  -9  -2   1   55.29   19.60
  -9  -2   1   22.70   10.70
  -9  -2   1   18.30   17.10
  -8  -2   1   17.60   12.00
  -8  -2   1    6.50   15.30
  -8  -2   1   12.70    6.20
  -7  -2   1   44.60   18.50
  -7  -2   1   35.70   14.40
  -7  -2   1   31.10   17.90
  -6  -2   1  544.35  197.58
  -6  -2   1  516.35  197.08
  -6  -2   1  543.85  198.48
   5   2  -1  292.07   99.99
   5   2  -1  260.07   99.69
  -5  -2   1  251.57   99.39
  -5  -2   1  272.27   99.89
  -5  -2   1  264.87  100.69
   4   2  -1  406.86  142.79
   4   2  -1  423.86  142.79
   4   2  -1  371.16  143.39
  -4  -2   1  375.06  143.49
  -4  -2   1  387.86  142.49
  -4  -2   1  348.27  142.69
   3   2  -1  265.87   97.49
   3   2  -1  314.97   97.29
   3   2  -1  249.18   98.09
  -3  -2   1  250.67   98.09
  -3  -2   1  234.68   97.39
  -3  -2   1  247.98   97.29
   2   2  -1  734.93  286.87
   2   2  -1  791.02  286.57
   2   2  -1  825.22  286.37
  -2  -2   1  724.93  286.87
  -2  -2   1  779.42  286.57
  -2  -2   1  781.82  286.47
   1   2  -1 1528.75  544.05
   1   2  -1 1537.05  543.95
   1   2  -1 1352.46  543.85
  -1  -2   1 1492.85  543.95
  -1  -2   1 1457.15  544.05
   0   2  -1  404.96  154.88
   0   2  -1  416.36  154.88
   0  -2   1  443.76  154.98
   0  -2   1  411.36  154.88
  -1   2  -1 1465.55  548.65
   1  -2   1 1504.15  548.65
  -2   2  -1 1088.29  384.16
  -2   2  -1 1003.90  384.16
   2  -2   1 1024.50  384.16
  -3   2  -1  283.17  101.49
  -3   2  -1  255.27  101.79
   3  -2   1  306.67  101.49
   3  -2   1  248.18  101.39
  -4   2  -1  378.66  137.29
  -4   2  -1  354.36  136.79
   4  -2   1  350.36  136.79
   4  -2   1  392.56  136.79
  -5   2  -1  136.09   75.59
  -5   2  -1  245.98   74.99
  -5   2  -1  237.78   74.79
   5  -2   1  193.18   73.99
  -6   2  -1  563.24  199.38
  -6   2  -1  516.75  198.38
  -7   2  -1   41.10   17.40
  -7   2  -1   31.70   13.60
  -8   2  -1   19.10   12.40
  -8   2  -1   19.90    8.90
  -9   2  -1   32.10   13.40
  -9   2  -1   31.70   17.90
 -10   2  -1  133.99   48.10
 -10   2  -1  110.29   51.89
 -11   2  -1   73.59   29.80
 -11   2  -1   88.69   35.30
 -12   2  -1  171.08   74.29
 -12   2  -1  189.18   69.29
 -13   2  -1   88.69   35.70
 -13   2  -1  101.69   41.50
 -14   2  -1   15.10    9.50
 -14   2  -1   17.60   18.10
  14  -2   1    5.80   10.10
 -15   2  -1   94.59   33.30
 -15   2  -1   41.50   38.40
  15  -2   1   96.59   34.60
 -16   2  -1   90.19   36.20
 -16   2  -1   49.70   25.80
  16  -2   1   69.59   28.50
 -17   2  -1   25.80   17.50
  17  -2   1   56.49   21.30
 -17  -1   1   15.50   19.40
 -16  -1   1   21.90   10.60
 -16  -1   1   23.80   20.40
 -15  -1   1   -3.10   14.30
 -15  -1   1    0.90    6.40
 -14  -1   1   -1.10    5.40
 -14  -1   1   -3.60   13.30
 -13  -1   1  -17.00   11.00
 -13  -1   1    7.50    6.20
 -12  -1   1   -5.00   14.20
 -12  -1   1   -1.40    5.30
 -11  -1   1   -8.40    4.50
 -11  -1   1   -6.10   11.90
 -10  -1   1    1.50    4.60
 -10  -1   1    2.00   12.10
  -9  -1   1   -1.70    3.90
  -9  -1   1   -1.90   10.20
  -8  -1   1    3.70    3.70
  -8  -1   1   -5.40    7.50
  -8  -1   1    8.80   12.80
  -7  -1   1    6.00    8.40
  -7  -1   1    2.30    3.60
  -7  -1   1   19.80   14.70
   6   1  -1    9.10   11.70
   6   1  -1   -6.10    3.10
  -6  -1   1    6.40    8.60
  -6  -1   1   -0.50    2.90
  -6  -1   1    0.00   13.20
   5   1  -1   -6.00    9.80
   5   1  -1   -1.00    2.50
   5   1  -1   -2.40    6.10
   5   1  -1   16.10    4.10
  -5  -1   1    0.60    2.70
  -5  -1   1  -22.30   11.50
  -5  -1   1    1.40    7.30
   4   1  -1   -5.70    6.10
   4   1  -1   -5.00    9.30
   4   1  -1   -1.30    2.20
   4   1  -1   -5.00    3.10
  -4  -1   1    0.70    7.00
  -4  -1   1  -10.80   11.30
  -4  -1   1    0.30    2.30
   3   1  -1    3.70    7.90
   3   1  -1   -7.60    5.60
   3   1  -1   -0.80    3.40
   3   1  -1    5.50    2.30
  -3  -1   1   -6.00    2.40
  -3  -1   1    9.90   10.10
  -3  -1   1    0.00    6.00
   2   1  -1   -0.10    4.90
   2   1  -1    1.70    1.70
   2   1  -1   -3.10    6.30
   2   1  -1    1.30    2.90
  -2  -1   1   -4.20    1.70
  -2  -1   1    2.20    2.60
  -2  -1   1   -3.00    6.10
  -2  -1   1    0.70    5.00
   1   1  -1    1.30    1.40
   1   1  -1   -2.20    3.50
   1   1  -1    1.90    3.40
   1   1  -1    2.60    2.30
  -1  -1   1    1.70    3.20
  -1  -1   1    1.30    1.70
  -1  -1   1    0.30    2.20
  -1   1  -1   -0.40    1.90
  -1   1  -1   -2.00    1.90
   1  -1   1    0.00    2.00
   1  -1   1    0.60    1.90
  -2   1  -1   -1.80    2.50
  -2   1  -1    4.30    8.50
  -2   1  -1    2.00    4.20
   2  -1   1    1.70    2.20
  -3   1  -1   -0.20   12.60
  -3   1  -1   -2.30    2.90
  -3   1  -1    4.20    6.30
   3  -1   1   -3.40    2.40
   3  -1   1    0.60    5.20
  -4   1  -1   -4.20   13.10
  -4   1  -1   -3.60    6.50
  -4   1  -1   -0.80    2.70
   4  -1   1   -3.80    5.60
  -5   1  -1   -1.00    7.00
  -5   1  -1    5.30   14.80
  -5   1  -1    1.10    2.90
   5  -1   1   -0.90    2.60
   5  -1   1   -0.70    5.60
  -6   1  -1   -1.60    3.00
  -6   1  -1    4.40   14.10
  -6   1  -1   -5.30    7.00
  -7   1  -1    2.00    3.40
  -7   1  -1    4.50    8.50
  -8   1  -1   -3.30    7.90
  -8   1  -1   -0.80    3.70
  -9   1  -1    1.20    4.30
  -9   1  -1    4.90   10.40
 -10   1  -1   -2.40    4.30
 -10   1  -1    0.10    9.50
 -11   1  -1   11.40   11.90
 -11   1  -1    5.00    6.00
 -12   1  -1   10.50    7.90
 -12   1  -1   13.00   14.60
 -13   1  -1    2.80   13.40
 -13   1  -1    2.20    7.10
 -14   1  -1   -0.10    7.10
 -14   1  -1    5.50   16.80
 -15   1  -1   10.60   15.90
 -15   1  -1    6.40    8.50
 -16   1  -1   22.10   19.10
 -16   1  -1    7.60    9.50
 -17   1  -1   18.50   10.00
 -17   1  -1    3.20   18.80
  17  -1   1    4.60   13.80
 -17   0   1    6.80   20.50
 -17   0   1   39.60   14.00
 -16   0   1   10.90   18.30
 -16   0   1    3.60    7.70
 -15   0   1   46.20   28.40
 -15   0   1   48.30   19.90
 -14   0   1   -7.10    6.30
 -14   0   1   -7.00   12.70
 -13   0   1   10.30    9.40
 -13   0   1   44.10   21.20
 -12   0   1   83.09   32.10
 -11   0   1   12.60    6.10
 -11   0   1   -9.00   11.10
 -10   0   1   18.70   14.10
 -10   0   1   10.50    6.60
  -9   0   1   97.29   39.30
  -9   0   1   89.19   34.00
  -8   0   1  212.08   73.29
  -8   0   1  161.78   74.99
   7   0  -1   98.49   35.30
  -7   0   1   64.69   33.10
  -7   0   1   98.69   35.40
  -7   0   1   75.49   29.70
   6   0  -1  960.90  340.57
  -6   0   1  883.71  340.37
  -6   0   1  838.52  340.57
  -6   0   1  968.50  339.47
   5   0  -1 1026.90  364.36
   5   0  -1  832.52  364.16
  -5   0   1 1099.99  363.46
  -5   0   1  904.01  364.36
  -5   0   1 1013.60  364.26
   4   0  -1  233.38   79.99
   4   0  -1  167.08   78.69
   4   0  -1  193.88   79.49
  -4   0   1  230.98   79.99
  -4   0   1  252.27   78.69
  -4   0   1  204.28   79.69
   3   0  -1  759.42  269.57
   3   0  -1  662.73  269.47
  -3   0   1  750.02  269.57
  -3   0   1  760.62  269.07
  -3   0   1  693.93  269.57
   2   0  -1  209.38   68.99
   2   0  -1  178.28   68.79
   2   0  -1  159.58   68.29
  -2   0   1  185.18   68.29
  -2   0   1  179.28   68.79
  -2   0   1  216.68   68.99
  -1   0   1   -2.90    2.70
  -2   0  -1  187.08   64.69
  -2   0  -1  168.68   64.49
   2   0   1  173.58   64.49
   2   0   1  166.48   63.99
  -3   0  -1  687.53  246.88
  -3   0  -1  740.23  246.88
   3   0   1  609.14  246.28
   3   0   1  641.34  246.78
  -4   0  -1  213.08   73.79
  -4   0  -1  211.98   73.79
   4   0   1  179.58   72.69
  -5   0  -1  908.91  337.67
  -5   0  -1  946.51  337.87
   5   0   1  882.61  337.67
  -6   0  -1 1014.70  347.77
  -6   0  -1  882.11  348.57
   6   0   1  916.71  347.87
  -7   0  -1   90.39   34.60
  -7   0  -1   66.99   31.20
  -7   0  -1   71.29   28.40
   7   0   1   82.69   29.10
  -8   0  -1  210.58   78.79
  -8   0  -1  218.88   82.39
  -9   0  -1   77.39   38.00
  -9   0  -1   92.99   33.90
 -10   0  -1    8.50   11.80
 -10   0  -1    9.10    6.10
 -11   0  -1    3.90    6.40
 -11   0  -1   18.20   13.40
 -12   0  -1   91.89   42.30
 -12   0  -1   62.39   25.60
 -13   0  -1   56.39   27.30
 -13   0  -1   43.40   19.10
 -14   0  -1  -29.50   11.80
 -14   0  -1    3.20    6.70
 -15   0  -1   47.70   19.80
 -15   0  -1   42.80   28.70
 -16   0  -1   14.90   17.20
 -16   0  -1   -6.40    7.00
 -17   0  -1   44.50   14.60
 -17   0  -1    6.50   19.70
  17  -1  -1   -0.70   13.80
 -17   1   1   31.30   29.10
 -17   1   1   30.40   11.40
 -16   1   1   -5.20    7.80
 -16   1   1   15.90   19.50
 -15   1   1   -8.40    7.80
 -15   1   1   -9.40   15.50
 -14   1   1   13.80   17.80
 -14   1   1   11.50    9.10
 -13   1   1   23.10   16.50
 -13   1   1   -6.90    6.40
 -12   1   1    6.90    6.30
 -12   1   1  -19.40   10.50
 -11   1   1   -0.90    4.90
 -11   1   1    4.30   13.20
 -10   1   1    8.50    5.00
 -10   1   1   -4.90   10.30
  -9   1   1    2.40    4.10
  -9   1   1   -0.80    8.00
  -8   1   1   -4.70    8.30
  -8   1   1    5.60    4.00
   7  -1  -1  -11.40   13.60
  -7   1   1    0.70    3.00
  -7   1   1   -7.10    6.20
   6  -1  -1   -3.60    7.00
   6  -1  -1    3.00   14.70
  -6   1   1    1.80    3.00
  -6   1   1   -1.40    7.50
  -6   1   1    5.50   14.40
   5  -1  -1   11.80    6.80
   5  -1  -1   -3.00    2.60
   5  -1  -1   -8.70   11.20
  -5   1   1   -1.50    2.60
  -5   1   1   -2.00    7.00
  -5   1   1    2.10   15.30
   4  -1  -1   -1.50    5.70
   4  -1  -1    3.00    2.80
   4  -1  -1   15.40   13.30
  -4   1   1   -5.30    2.30
  -4   1   1   -0.10    6.30
  -4   1   1  -12.10   14.20
   3  -1  -1    3.00    2.70
   3  -1  -1   11.80   12.20
   3  -1  -1    3.00    5.50
  -3   1   1   -1.40    2.70
  -3   1   1    4.20    6.00
  -3   1   1  -10.70   11.90
   2  -1  -1   -2.90    2.10
   2  -1  -1    0.00   10.00
   2  -1  -1   -0.20    4.00
  -2   1   1    2.10    4.10
  -2   1   1   -4.20    9.50
  -2   1   1    0.60    2.60
   1  -1  -1   -3.70    2.10
   1  -1  -1   -1.10    2.00
   1  -1  -1   -2.40    6.50
  -1   1   1   -0.70    1.80
  -1   1   1    2.30    7.10
  -1   1   1   -5.20    2.00
   0  -1  -1    1.40    1.90
  -1  -1  -1    1.20    1.60
  -1  -1  -1    2.40    3.10
  -1  -1  -1    0.80    2.20
   1   1   1    1.20    2.60
   1   1   1   -2.60    2.90
   1   1   1    0.20    1.30
  -2  -1  -1    6.10    5.00
  -2  -1  -1   -6.90    1.90
  -2  -1  -1    5.80    5.50
  -2  -1  -1    1.40    2.90
   2   1   1   -4.20    1.80
   2   1   1   -1.80    3.00
   2   1   1   -1.10    4.90
  -3  -1  -1    3.20    3.30
  -3  -1  -1    3.30    8.30
  -3  -1  -1    5.90    3.10
  -3  -1  -1    0.20    6.60
   3   1   1    5.90    4.00
   3   1   1    3.70    6.50
   3   1   1    0.60    2.80
  -4  -1  -1   -3.00    9.90
  -4  -1  -1    6.00    2.80
  -4  -1  -1    1.90    6.70
   4   1   1   -1.20    3.70
   4   1   1    3.10    2.90
   4   1   1   -3.20    6.20
  -5  -1  -1    7.60    3.10
  -5  -1  -1   -3.20   11.00
  -5  -1  -1   -1.40    6.80
   5   1   1    1.30    2.60
   5   1   1   -5.20    3.40
   5   1   1   -2.90    5.90
  -6  -1  -1   12.50   12.70
  -6  -1  -1    2.10    8.50
  -6  -1  -1   -1.10    3.10
   6   1   1   -7.10    3.40
  -7  -1  -1   14.20   15.10
  -7  -1  -1    0.10    8.30
  -7  -1  -1   -2.40    3.30
  -8  -1  -1    3.10    8.50
  -8  -1  -1   -4.50   11.70
  -8  -1  -1   -1.20    3.70
  -9  -1  -1   -0.70    4.10
  -9  -1  -1   -2.40    8.40
 -10  -1  -1   -1.00   10.40
 -10  -1  -1   -2.10    4.60
 -11  -1  -1    3.90    5.50
 -11  -1  -1   -6.80   10.90
 -12  -1  -1    2.70   13.20
 -12  -1  -1   -0.60    5.60
 -13  -1  -1    4.90    6.30
 -13  -1  -1   22.80   18.70
 -14  -1  -1   -1.20   14.20
 -14  -1  -1    0.20    6.00
 -15  -1  -1   12.30   16.90
 -15  -1  -1    3.00    6.30
 -16  -1  -1   27.80   12.90
 -16  -1  -1   30.90   22.60
 -17  -1  -1  -37.40   11.40
  17  -2  -1   57.79   24.40
 -17   2   1   42.80   31.10
 -17   2   1   39.00   19.70
  16  -2  -1   71.89   35.00
 -16   2   1   89.29   33.80
 -16   2   1   98.39   41.90
  15  -2  -1   74.19   26.70
 -15   2   1   59.19   24.50
 -15   2   1   32.10   32.60
 -14   2   1   -0.60    7.80
 -14   2   1   40.00   20.50
 -13   2   1   56.99   39.00
 -13   2   1   99.59   33.90
 -12   2   1  231.88   86.29
 -12   2   1  213.38   81.09
 -11   2   1   87.19   33.40
 -11   2   1   66.59   27.60
 -10   2   1   96.49   49.00
 -10   2   1  130.99   45.70
  -9   2   1   26.00   17.20
  -9   2   1   35.30   13.40
  -8   2   1   11.30   11.00
  -8   2   1   18.50    7.70
   7  -2  -1   45.20   24.80
  -7   2   1   38.40   16.60
  -7   2   1   51.19   20.20
   6  -2  -1  606.34  197.18
   6  -2  -1  499.95  196.08
  -6   2   1  540.25  196.38
  -6   2   1  491.45  195.48
   5  -2  -1  250.47   89.79
   5  -2  -1  262.77   90.99
   5  -2  -1  214.18   89.29
  -5   2   1  277.57   90.19
  -5   2   1  218.08   89.29
  -5   2   1  246.68   91.09
   4  -2  -1  406.36  138.89
   4  -2  -1  376.36  137.79
   4  -2  -1  368.76  137.49
   4  -2  -1  335.67  137.49
  -4   2   1  363.46  137.49
  -4   2   1  377.16  138.79
  -4   2   1  387.56  137.99
   3  -2  -1  231.48   92.69
   3  -2  -1  266.97   91.59
   3  -2  -1  262.47   91.69
   3  -2  -1  239.58   91.49
  -3   2   1  240.88   91.59
  -3   2   1  211.78   92.69
  -3   2   1  257.07   91.79
   2  -2  -1  636.64  276.47
   2  -2  -1  789.52  275.97
  -2   2   1  734.33  275.87
  -2   2   1  820.32  275.97
  -2   2   1  671.13  276.47
  -2   2   1  821.02  275.97
   1  -2  -1 1543.45  522.45
   1  -2  -1 1368.46  522.75
  -1   2   1 1198.28  522.75
  -1   2   1 1549.94  522.45
   0  -2  -1  437.36  157.58
   0  -2  -1  393.06  157.18
   0  -2  -1  431.96  157.28
   0   2   1  402.66  157.28
   0   2   1  458.55  157.58
   0   2   1  432.56  157.18
  -1  -2  -1 1377.86  558.14
  -1  -2  -1 1640.54  558.14
  -1  -2  -1 1485.15  558.34
  -1  -2  -1 1517.45  558.24
   1   2   1 1569.14  558.24
   1   2   1 1478.75  558.14
   1   2   1 1503.55  558.34
  -2  -2  -1  861.91  309.57
  -2  -2  -1  799.42  309.97
  -2  -2  -1  815.22  309.67
   2   2   1  868.81  309.77
   2   2   1  897.51  309.57
   2   2   1  771.72  309.97
  -3  -2  -1  273.47  108.79
  -3  -2  -1  290.77  108.09
  -3  -2  -1  277.37  108.19
   3   2   1  267.67  108.29
   3   2   1  276.87  108.79
   3   2   1  347.57  108.09
  -4  -2  -1  403.96  146.09
  -4  -2  -1  381.76  147.09
  -4  -2  -1  377.96  146.19
  -4  -2  -1  400.26  146.29
   4   2   1  367.26  146.89
   4   2   1  435.16  146.59
  -5  -2  -1  252.17   96.79
  -5  -2  -1  239.08   98.09
  -5  -2  -1  271.97   97.29
   5   2   1  274.77   97.19
  -6  -2  -1  556.44  203.38
  -6  -2  -1  518.35  202.88
  -6  -2  -1  591.44  204.28
  -7  -2  -1   47.90   19.30
  -7  -2  -1   57.39   23.40
  -7  -2  -1   47.60   23.40
  -8  -2  -1   15.40    7.00
  -8  -2  -1   11.50   11.80
  -9  -2  -1   13.60   16.90
  -9  -2  -1   21.70    9.60
  -9  -2  -1   30.00   14.90
 -10  -2  -1  126.99   46.30
 -10  -2  -1   96.09   40.00
 -10  -2  -1  140.09   49.80
 -11  -2  -1   72.29   33.10
 -11  -2  -1   69.09   27.00
 -12  -2  -1  171.58   61.69
 -12  -2  -1  140.99   54.99
 -13  -2  -1   84.89   36.90
 -13  -2  -1   71.49   29.10
 -14  -2  -1   20.10    9.20
 -14  -2  -1    4.60   17.40
 -15  -2  -1   88.39   31.30
 -15  -2  -1   56.99   37.40
 -16  -2  -1   56.39   21.50
 -16  -2  -1   40.70   28.00
 -17  -2  -1  141.69   40.20
 -17  -2  -1   27.90   43.40
  17  -3  -1    8.20   15.40
 -17   3   1   34.80   19.60
 -17   3   1  -23.70    8.20
  16  -3  -1   22.60   13.40
 -16   3   1    9.50   10.60
 -16   3   1  -16.50   15.50
  15  -3  -1   -4.20    9.70
 -15   3   1    9.00   16.30
 -15   3   1   -0.10    8.90
  14  -3  -1    3.20    9.30
 -14   3   1    2.40   15.50
 -14   3   1    7.90    8.30
  13  -3  -1    3.70    9.80
 -13   3   1  -12.10   13.40
 -13   3   1   -5.30    6.70
  12  -3  -1    4.40    7.50
 -12   3   1    0.40    6.40
 -12   3   1   -6.50   12.90
  11  -3  -1    1.30    6.90
 -11   3   1   11.50    7.00
 -11   3   1    6.00   11.80
  10  -3  -1    1.40    6.30
 -10   3   1    5.00   10.30
 -10   3   1    3.40    6.00
   9  -3  -1    6.50    5.70
  -9   3   1    0.60    4.30
  -9   3   1    0.70    9.10
   8  -3  -1   -1.40    4.70
  -8   3   1   -2.60    4.00
  -8   3   1  -10.00    6.60
   7  -3  -1    3.40    4.70
   7  -3  -1   10.00   17.10
  -7   3   1   -6.00    3.20
  -7   3   1   -3.80    7.00
   6  -3  -1    5.50   16.30
   6  -3  -1   -4.90    4.10
  -6   3   1   -1.30    6.30
  -6   3   1   -1.00    4.00
   5  -3  -1    0.40    4.60
   5  -3  -1  -22.00   14.50
  -5   3   1   -2.70    5.60
  -5   3   1   -1.80    4.10
   4  -3  -1    7.50   14.00
   4  -3  -1    4.20    5.00
  -4   3   1   -3.70    4.20
  -4   3   1   20.30   16.30
  -4   3   1   -1.80    5.40
   3  -3  -1   -7.50   12.30
   3  -3  -1   -1.00    4.80
  -3   3   1    6.90    4.70
  -3   3   1    5.10    5.00
  -3   3   1    3.60   13.50
  -3   3   1    1.00    4.60
   2  -3  -1    0.70    5.20
   2  -3  -1   -3.70   13.40
  -2   3   1   10.20   15.00
  -2   3   1    9.10    5.70
   1  -3  -1    3.90    5.20
   1  -3  -1   -7.80   12.20
  -1   3   1   -1.40    4.80
  -1   3   1   -0.80   11.20
   0  -3  -1   -0.10    4.90
   0  -3  -1    5.40   10.90
   0  -3  -1    2.60    4.10
   0   3   1   -1.90   10.30
   0   3   1   -2.60    3.80
   0   3   1    4.10    5.00
  -1  -3  -1   -1.50    5.60
  -1  -3  -1   -0.20    5.10
  -1  -3  -1    2.40    9.00
   1   3   1    6.10    9.50
   1   3   1   -5.40    4.90
   1   3   1    3.70    3.00
   1   3   1    3.90    5.40
  -2  -3  -1   -3.50    6.20
  -2  -3  -1    4.10    3.80
  -2  -3  -1    2.70    5.00
   2   3   1   -4.30    5.80
   2   3   1   -1.20    5.40
   2   3   1   -0.10    3.20
  -3  -3  -1   -0.50    6.90
  -3  -3  -1    0.60    4.50
  -3  -3  -1   -3.90    3.40
   3   3   1   -2.00    2.80
   3   3   1   -5.10    4.80
   3   3   1   11.60    7.40
  -4  -3  -1   -7.30    7.10
  -4  -3  -1   -3.30    4.60
  -4  -3  -1   -5.10    3.40
   4   3   1   -2.40    2.90
   4   3   1    3.80    6.70
   4   3   1   -5.80    4.60
  -5  -3  -1   -9.20    3.20
  -5  -3  -1   -6.50    2.90
  -5  -3  -1   -3.50    6.70
  -6  -3  -1    1.60    3.90
  -6  -3  -1   -8.80    2.70
  -6  -3  -1    3.80    8.20
  -7  -3  -1   -7.70    2.90
  -7  -3  -1    1.70    8.80
  -7  -3  -1    6.90    8.30
  -8  -3  -1    8.40    9.60
  -8  -3  -1   -4.80    3.10
  -8  -3  -1    4.80    9.10
  -9  -3  -1   29.30   10.70
  -9  -3  -1   -8.00    9.00
  -9  -3  -1   -5.30    3.60
 -10  -3  -1   16.50   15.40
 -10  -3  -1   -6.80    3.90
 -10  -3  -1    0.90   12.30
 -11  -3  -1   -6.50   15.20
 -11  -3  -1   -3.90    4.10
 -11  -3  -1   -6.80   16.20
 -12  -3  -1   11.90   16.10
 -12  -3  -1    4.90    5.40
 -13  -3  -1    2.40    4.70
 -13  -3  -1   17.50   16.60
 -14  -3  -1   26.40   12.00
 -14  -3  -1   25.40   22.00
 -15  -3  -1   -4.50   15.20
 -15  -3  -1   22.20    8.80
 -16  -3  -1   39.20   13.30
 -16  -3  -1   -3.60   20.90
 -17  -3  -1  -10.10   22.10
 -17  -3  -1   69.29   17.90
  16  -4  -1   24.10   17.10
 -16   4   1   20.30   16.50
 -16   4   1   31.20   20.40
  15  -4  -1   55.49   21.00
 -15   4   1   26.60   23.30
 -15   4   1   40.80   18.80
  14  -4  -1   56.79   22.80
 -14   4   1   43.30   19.70
 -14   4   1   43.30   26.00
  13  -4  -1   35.50   14.90
 -13   4   1   12.60   11.50
 -13   4   1   21.60   18.70
  12  -4  -1   17.40   10.50
 -12   4   1    1.80    7.60
 -12   4   1   10.50   13.90
  11  -4  -1   35.30   13.90
 -11   4   1    9.00   15.70
 -11   4   1   28.90   12.30
  10  -4  -1   54.39   23.50
 -10   4   1   57.99   22.50
 -10   4   1   53.89   25.60
   9  -4  -1    6.50    8.30
  -9   4   1   28.80   12.90
  -9   4   1   13.10    7.60
   8  -4  -1   25.10    9.90
  -8   4   1   22.20   12.10
  -8   4   1    8.70    8.20
   7  -4  -1   29.80   14.70
  -7   4   1   25.90   13.20
  -7   4   1   39.90   15.70
   6  -4  -1   71.49   30.60
   6  -4  -1   69.79   23.70
  -6   4   1   59.69   24.00
  -6   4   1   43.90   22.70
   5  -4  -1  114.89   41.30
   5  -4  -1  152.08   47.90
  -5   4   1   97.19   40.90
  -5   4   1  101.39   40.90
   4  -4  -1  221.38   86.69
   4  -4  -1  212.28   84.79
  -4   4   1  240.18   84.79
  -4   4   1  239.28   84.79
  -4   4   1  225.08   84.79
   3  -4  -1  -29.20   13.80
   3  -4  -1   11.80    6.00
  -3   4   1   -0.10    5.00
  -3   4   1   -4.90    3.90
  -3   4   1    3.50   14.90
   2  -4  -1  165.08   67.19
   2  -4  -1  172.78   65.69
  -2   4   1  203.78   69.69
   1  -4  -1  156.18   57.59
   1  -4  -1  166.18   58.99
  -1   4   1  162.78   57.89
  -1   4   1  131.39   58.59
   0  -4  -1  365.66  134.29
   0  -4  -1  387.96  134.59
   0  -4  -1  379.26  135.09
   0   4   1  290.17  134.89
   0   4   1  393.16  134.89
   0   4   1  373.16  134.39
  -1  -4  -1  142.49   56.19
  -1  -4  -1  165.48   56.39
   1   4   1  163.08   56.39
   1   4   1  149.49   56.29
   1   4   1  131.99   55.69
   1   4   1  156.88   56.69
  -2  -4  -1  169.28   60.09
  -2  -4  -1  144.39   60.49
   2   4   1  162.58   60.09
   2   4   1  168.78   60.39
   2   4   1  156.48   60.09
   2   4   1  158.58   59.59
  -3  -4  -1    2.90    7.20
  -3  -4  -1    6.90    5.60
  -3  -4  -1   -4.00    4.00
   3   4   1    4.00    3.10
   3   4   1   -2.60    5.20
   3   4   1    3.70    6.20
  -4  -4  -1  208.78   79.99
  -4  -4  -1  217.08   80.19
  -4  -4  -1  223.08   81.19
  -5  -4  -1  111.29   38.70
  -5  -4  -1   88.19   37.70
  -5  -4  -1  119.29   40.60
  -6  -4  -1   62.99   22.90
  -6  -4  -1   60.29   23.20
  -6  -4  -1   47.60   25.50
  -7  -4  -1   23.10   10.20
  -7  -4  -1   21.50   10.70
  -7  -4  -1   33.20   15.40
  -8  -4  -1    7.50    5.40
  -8  -4  -1   15.10   12.60
  -9  -4  -1   49.99   24.20
 -10  -4  -1   66.19   25.80
 -10  -4  -1   65.69   31.50
 -11  -4  -1   50.59   27.80
 -12  -4  -1   23.30   11.70
 -12  -4  -1   51.09   23.10
 -13  -4  -1   42.30   26.50
 -13  -4  -1   39.20   16.70
 -14  -4  -1   25.20   24.80
 -14  -4  -1   44.00   17.10
 -15  -4  -1   63.69   23.60
 -15  -4  -1   39.60   31.30
 -16  -4  -1   39.50   14.50
 -16  -4  -1    9.60   21.90
  16  -5  -1   18.60   15.30
 -16   5   1   12.30   15.70
 -16   5   1  -19.90    8.90
  15  -5  -1   -9.40   11.50
 -15   5   1    5.00    9.60
 -15   5   1    8.30   15.00
  14  -5  -1   20.40   12.40
 -14   5   1  -13.90    7.80
 -14   5   1   22.30   17.80
  13  -5  -1  -10.00    9.70
 -13   5   1    1.70    7.40
 -13   5   1  -10.10   14.10
  12  -5  -1    0.90    8.80
 -12   5   1    8.00   13.40
 -12   5   1   10.80    7.20
  11  -5  -1  -15.80    6.80
 -11   5   1   -4.60   12.00
 -11   5   1   -2.60    6.20
  10  -5  -1   -9.30    7.30
 -10   5   1    0.10   10.10
 -10   5   1   -5.10    6.00
   9  -5  -1    7.80    7.80
  -9   5   1   -1.30    5.00
  -9   5   1   -6.90    7.80
   8  -5  -1   11.20    7.10
  -8   5   1   -4.40    4.80
  -8   5   1   -4.00    8.00
   7  -5  -1    0.40    6.10
  -7   5   1   -8.30    4.40
  -7   5   1    1.70    7.10
   6  -5  -1   -3.90    6.70
  -6   5   1   -2.90    6.20
  -6   5   1   -2.60    5.00
   5  -5  -1   -3.90    5.30
   5  -5  -1   -3.70   15.50
  -5   5   1    1.00    5.00
  -5   5   1   -7.10    4.60
   4  -5  -1   -4.90    5.00
   4  -5  -1  -11.90   15.30
  -4   5   1   -1.00    5.20
  -4   5   1   -0.60    4.50
  -4   5   1   -6.60    4.10
   3  -5  -1  -26.80   13.80
   3  -5  -1   -4.80    5.10
  -3   5   1    3.60    5.40
   2  -5  -1   -7.60    5.40
   2  -5  -1    0.70   16.00
  -2   5   1    2.60    5.50
  -2   5   1  -13.40   13.00
   1  -5  -1    1.10    3.30
   1  -5  -1   -4.90    5.90
   1  -5  -1   17.60   14.90
  -1   5   1  -18.00   12.40
  -1   5   1    2.60    5.30
  -1   5   1   -1.70    3.80
   0  -5  -1    4.50    4.70
   0  -5  -1   -1.10    6.30
   0   5   1    5.40    4.90
   0   5   1   -1.20    5.20
   0   5   1   -9.00   11.80
  -1  -5  -1    0.10    5.40
  -1  -5  -1    2.10    6.10
   1   5   1    6.70   10.10
   1   5   1   -2.60    5.90
   1   5   1    4.10    3.30
   1   5   1   -7.10    5.10
  -2  -5  -1    3.00    6.60
  -2  -5  -1    2.90    6.10
   2   5   1    3.40    6.00
   2   5   1   -6.10   10.10
  -3  -5  -1   -5.40    6.30
  -3  -5  -1   -0.10    5.60
   3   5   1    6.70    6.60
  -4  -5  -1    0.00    8.60
  -4  -5  -1   -4.30    4.40
  -4  -5  -1   -1.00    5.10
  -5  -5  -1   -1.80    4.00
  -5  -5  -1    0.30    8.70
  -5  -5  -1    0.10    4.80
  -6  -5  -1   -2.80    4.00
  -6  -5  -1   -1.80    4.60
  -6  -5  -1   -7.30    8.30
  -7  -5  -1   -1.20    9.70
  -7  -5  -1    6.00    4.70
  -7  -5  -1    0.20    4.70
  -8  -5  -1   -2.70    9.50
  -8  -5  -1   -8.40    4.10
  -9  -5  -1   -0.10    5.30
  -9  -5  -1  -13.00   10.30
 -10  -5  -1    0.20   12.20
 -10  -5  -1  -13.40    4.50
 -11  -5  -1   -2.60    4.90
 -11  -5  -1    0.80   12.50
 -12  -5  -1   -3.80   12.00
 -12  -5  -1   -2.20    5.60
 -13  -5  -1   -9.20    4.80
 -13  -5  -1   -0.50   16.00
 -14  -5  -1   -8.40    6.40
 -14  -5  -1    3.30   16.60
 -15  -5  -1   29.00   22.80
 -15  -5  -1    6.90    8.20
 -16  -5  -1   31.30   12.90
 -16  -5  -1    1.10   19.60
  16  -6  -1   28.10   22.10
 -16   6   1   19.00   17.30
 -16   6   1   74.49   26.40
  15  -6  -1   61.19   17.90
 -15   6   1   -0.80   12.80
 -15   6   1   20.80   18.70
  14  -6  -1   62.69   26.00
 -14   6   1   70.09   29.40
 -14   6   1   43.70   23.60
  13  -6  -1   -1.90    9.20
 -13   6   1    6.10    8.70
 -13   6   1   15.80   15.20
  12  -6  -1    1.20   10.60
 -12   6   1    5.60   13.90
 -12   6   1   19.90    9.30
  11  -6  -1   15.40   12.30
 -11   6   1   25.30   16.30
 -11   6   1   24.70   11.80
  10  -6  -1   80.89   29.30
 -10   6   1   47.60   27.90
 -10   6   1  104.09   32.40
   9  -6  -1   13.60   13.00
  -9   6   1   44.80   13.30
  -9   6   1   21.70   14.70
   8  -6  -1   12.40    8.40
  -8   6   1    8.10    9.90
  -8   6   1    4.40    7.40
   7  -6  -1   42.00   16.90
  -7   6   1   36.40   16.50
  -7   6   1   31.70   15.50
   6  -6  -1  276.87  105.79
  -6   6   1  255.07  105.69
  -6   6   1  309.67  105.79
   5  -6  -1  216.38   81.79
  -5   6   1  193.88   81.69
  -5   6   1  235.38   81.59
   4  -6  -1   79.39   23.50
  -4   6   1   60.99   22.40
  -4   6   1   49.99   21.20
   2  -6  -1  115.39   44.80
   1  -6  -1  262.07   97.49
   1  -6  -1  285.27   99.89
  -1   6   1  267.67   97.59
  -1   6   1  245.08   99.19
   0  -6  -1   16.00    7.90
   0  -6  -1   12.00    9.50
   0   6   1   18.50   16.00
   0   6   1   13.80    8.00
  -1  -6  -1  260.77   97.89
  -1  -6  -1  292.77   98.09
   1   6   1  270.97   97.99
   1   6   1  234.68   98.39
  -2  -6  -1  107.69   42.00
  -2  -6  -1  117.89   43.10
   2   6   1  121.19   43.20
   2   6   1  102.09   42.50
  -3  -6  -1  268.47  102.89
  -3  -6  -1  280.57  102.39
  -4  -6  -1   56.99   26.70
  -4  -6  -1   67.29   25.40
  -5  -6  -1  183.58   78.89
  -5  -6  -1  223.68   79.29
  -5  -6  -1  246.28   80.69
  -6  -6  -1  276.27  104.09
  -6  -6  -1  277.77  104.29
  -6  -6  -1  289.37  105.69
  -7  -6  -1   32.10   15.70
  -7  -6  -1   38.90   15.30
  -7  -6  -1   44.60   22.10
  -8  -6  -1   17.90   10.00
  -8  -6  -1   18.20   14.80
  -8  -6  -1   18.70    9.80
  -9  -6  -1   11.40    7.50
  -9  -6  -1   12.40   14.50
 -10  -6  -1   92.79   34.40
 -10  -6  -1   53.29   28.40
 -11  -6  -1   29.30   18.00
 -11  -6  -1   10.60    8.20
 -12  -6  -1    0.60    5.20
 -12  -6  -1    4.50   15.50
 -13  -6  -1   23.50    8.70
 -13  -6  -1  -13.40   14.10
 -14  -6  -1   66.69   27.10
 -14  -6  -1   70.49   36.00
 -15  -6  -1   -0.80   18.30
 -15  -6  -1   29.90   11.80
 -16  -6  -1   32.60   26.90
  15  -7  -1   12.20   13.40
 -15   7   1  -17.00   11.60
 -15   7   1   -4.30    9.70
 -14   7   1   10.90   10.20
  13  -7  -1   17.10   11.30
 -13   7   1   -9.80    7.50
 -13   7   1    9.10   13.50
  12  -7  -1    6.60    9.90
 -12   7   1   -9.20   13.20
 -12   7   1    4.60    7.60
  11  -7  -1  -17.20    7.30
 -11   7   1   11.00    7.90
 -11   7   1    8.30   11.80
  10  -7  -1   -0.70    8.50
 -10   7   1    0.10    9.40
 -10   7   1    4.80    7.30
   9  -7  -1   16.30    8.80
  -9   7   1    6.30    9.50
  -9   7   1   -7.10    6.30
   8  -7  -1   -9.80    6.60
  -8   7   1   -7.70    6.60
  -8   7   1   -7.00    6.20
   7  -7  -1   12.30    8.60
  -7   7   1   -8.60    7.00
  -7   7   1   -4.40    6.20
   6  -7  -1    5.50    7.50
  -6   7   1    0.20    6.00
  -6   7   1   -0.60    6.00
   5  -7  -1   -1.70    6.30
  -5   7   1   -3.20    5.20
   4  -7  -1   10.70    8.70
   3  -7  -1   -2.70    6.30
   2  -7  -1    6.80    7.90
   1  -7  -1   -4.60    6.70
   1  -7  -1    0.70    3.50
  -1   7   1    0.10    4.50
   0  -7  -1   -1.50    5.00
   0  -7  -1    5.00    7.20
   0   7   1    3.50    5.30
  -1  -7  -1   -2.50    6.00
  -1  -7  -1   -0.90    6.60
   1   7   1   -6.00    5.60
   1   7   1    5.60   13.50
  -2  -7  -1   -8.20    5.80
  -2  -7  -1    3.90    6.20
   2   7   1    7.30   12.10
   2   7   1   -1.80    6.30
  -3  -7  -1    5.00    8.40
  -3  -7  -1   -3.10    6.30
   3   7   1   15.70   10.70
  -4  -7  -1   -1.60    8.20
  -4  -7  -1    5.80    6.10
  -5  -7  -1    2.60    5.80
  -5  -7  -1   -6.60    8.50
  -6  -7  -1   -4.40    4.60
  -6  -7  -1    3.50    9.90
  -6  -7  -1   -1.90    6.90
  -7  -7  -1    6.90    6.60
  -7  -7  -1   -2.60    5.10
  -7  -7  -1   -5.30    9.90
  -8  -7  -1   10.60    6.30
  -8  -7  -1   -2.60    5.20
  -8  -7  -1   11.60   14.40
  -9  -7  -1    4.70    6.90
  -9  -7  -1   23.50   15.10
  -9  -7  -1   -9.80    5.40
 -10  -7  -1   10.70   15.00
 -10  -7  -1   -4.50    5.50
 -11  -7  -1    3.40    5.80
 -11  -7  -1  -16.70   11.40
 -12  -7  -1   10.70    7.10
 -12  -7  -1  -11.90   13.90
 -13  -7  -1   -0.90    6.90
 -13  -7  -1   -4.50   15.30
 -14  -7  -1    5.70    7.50
 -14  -7  -1  -12.10   17.10
 -15  -7  -1   11.50   17.40
 -15  -7  -1   12.60   10.80
  15  -8  -1    9.50   19.10
 -15   8   1   29.90   16.30
 -15   8   1   46.00   20.10
  14  -8  -1   89.99   28.20
 -14   8   1   29.30   26.70
 -14   8   1   56.49   23.70
  13  -8  -1   -4.80   11.30
 -13   8   1    4.80   10.30
 -13   8   1   35.90   15.80
  12  -8  -1   41.40   20.00
 -12   8   1   26.80   18.40
 -12   8   1   72.89   23.80
  11  -8  -1   24.40   17.20
 -11   8   1   18.20   18.30
 -11   8   1   47.90   15.90
  10  -8  -1  115.09   50.79
 -10   8   1  143.79   52.19
   9  -8  -1   60.79   22.60
  -9   8   1   63.09   22.20
  -9   8   1   27.30   20.30
   8  -8  -1   39.00   21.00
  -8   8   1   50.39   20.40
  -8   8   1   51.09   20.90
   7  -8  -1    9.90    9.40
  -7   8   1   22.90    9.40
  -7   8   1    8.10    8.40
   6  -8  -1   36.40   14.80
  -6   8   1   18.80   12.30
   5  -8  -1  203.98   70.99
  -5   8   1  172.28   70.69
   4  -8  -1  173.68   65.79
   3  -8  -1   17.00   11.10
   2  -8  -1  183.48   69.29
   1  -8  -1  176.78   74.79
   1  -8  -1  196.08   73.99
  -1   8   1  214.88   74.29
   0  -8  -1   59.09   17.60
   0  -8  -1   33.80   17.90
   0   8   1   30.40   16.90
  -1  -8  -1  228.38   77.39
  -1  -8  -1  191.18   77.19
   1   8   1  205.18   77.19
  -2  -8  -1  169.28   58.69
  -2  -8  -1  176.08   58.69
   2   8   1  131.49   58.59
  -3  -8  -1   24.50   13.70
  -3  -8  -1   28.60   14.90
  -4  -8  -1  167.98   53.29
  -4  -8  -1  156.58   51.99
   4   8   1  115.09   51.79
  -5  -8  -1  182.28   72.19
  -5  -8  -1  204.18   73.39
  -6  -8  -1   13.30   10.70
  -6  -8  -1   37.20   16.90
  -7  -8  -1    4.80    7.90
  -7  -8  -1    8.80   13.30
  -7  -8  -1   23.90    8.90
  -8  -8  -1   36.50   17.20
  -8  -8  -1   46.70   23.50
  -8  -8  -1   42.60   18.20
  -9  -8  -1   28.70   13.90
  -9  -8  -1   12.50   18.80
  -9  -8  -1   42.60   15.00
 -10  -8  -1   94.49   36.10
 -10  -8  -1   86.89   41.40
 -11  -8  -1   49.70   22.80
 -11  -8  -1   12.10   10.30
 -12  -8  -1   57.59   25.10
 -12  -8  -1   17.00   12.20
 -13  -8  -1   17.20   11.50
 -13  -8  -1   28.50   20.10
 -14  -8  -1   70.99   47.70
 -14  -8  -1   66.19   27.40
 -15  -8  -1   45.30   19.30
 -15  -8  -1   45.90   29.60
  14  -9  -1   21.30   13.90
 -14   9   1   19.70    9.40
 -14   9   1  -16.60   12.60
  13  -9  -1   17.10   12.80
 -13   9   1  -17.40    8.30
 -13   9   1   38.90   15.70
  12  -9  -1   -5.80   10.60
 -12   9   1    6.80    9.40
 -12   9   1   12.30   11.80
  11  -9  -1    7.40   10.80
 -11   9   1   -2.60    8.10
 -11   9   1   13.40    9.80
  10  -9  -1    2.50   11.20
 -10   9   1    4.40   10.00
 -10   9   1   -3.10    9.20
   9  -9  -1    0.60    8.30
  -9   9   1    2.40    8.00
  -9   9   1    3.60    8.40
   8  -9  -1   11.00   10.00
  -8   9   1    4.40    7.00
   7  -9  -1   -7.30    8.80
  -7   9   1   -8.70    6.40
   6  -9  -1   -0.30    8.70
  -6   9   1   -8.00    6.70
   5  -9  -1    4.90    8.40
  -5   9   1   -0.10    6.40
   4  -9  -1    4.80    8.90
   3  -9  -1  -10.60    6.70
   2  -9  -1    4.40    9.30
   1  -9  -1   -0.50    4.20
   1  -9  -1    7.80    8.80
  -1   9   1   -1.30    5.00
   0  -9  -1   -2.80    8.10
   0  -9  -1    5.60    5.90
   0   9   1    6.00    6.70
  -1  -9  -1   -5.90    6.00
  -1  -9  -1    1.60    8.50
   1   9   1    4.70    6.50
  -2  -9  -1   10.00    8.10
  -2  -9  -1   -6.20    7.10
  -3  -9  -1   12.20   10.10
  -3  -9  -1   -3.90    8.80
   3   9   1   32.20   14.60
  -4  -9  -1   -2.40    7.10
  -4  -9  -1    6.20    9.60
   4   9   1   15.70   12.50
  -5  -9  -1  -11.00    6.10
  -5  -9  -1   -3.30   10.30
  -6  -9  -1    2.10    6.90
  -6  -9  -1    4.30   10.10
  -7  -9  -1    4.80   12.00
  -7  -9  -1    9.00    8.40
  -8  -9  -1   -8.60    5.90
  -8  -9  -1   10.20   13.10
  -9  -9  -1    7.70    7.40
  -9  -9  -1   -5.40    5.40
  -9  -9  -1   -2.80   13.50
 -10  -9  -1   10.90   16.30
 -10  -9  -1   -6.90    6.20
 -11  -9  -1   10.00    7.70
 -11  -9  -1   -5.60   14.20
 -12  -9  -1    2.90   15.00
 -12  -9  -1  -13.50    6.20
 -13  -9  -1   -5.40   15.40
 -13  -9  -1   -1.80    7.10
 -14  -9  -1   28.70   15.30
 -14  -9  -1   -3.60   17.80
  14 -10  -1   18.40   17.10
 -14  10   1    1.20    9.70
  13 -10  -1   23.90   14.60
 -13  10   1   11.30   11.90
  12 -10  -1    1.00   13.30
 -12  10   1    9.30    9.60
 -12  10   1    7.10    9.40
  11 -10  -1    9.40   11.70
 -11  10   1   11.30   10.10
  10 -10  -1   -2.30   10.40
 -10  10   1   -3.30    9.00
   9 -10  -1   36.80   18.10
  -9  10   1   30.50   16.20
   8 -10  -1   36.60   18.20
  -8  10   1   30.30   16.00
   7 -10  -1  116.99   33.20
  -7  10   1   54.19   29.70
   6 -10  -1   25.60   13.90
  -6  10   1   16.00   11.70
   5 -10  -1   10.00   10.90
  -5  10   1    0.70    7.80
   4 -10  -1   18.00   13.80
   3 -10  -1   25.10   15.00
   2 -10  -1  186.48   71.99
   1 -10  -1  206.08   58.99
  -1  10   1  136.39   55.59
   0 -10  -1    5.50    7.30
   0 -10  -1   -0.80    9.80
   0  10   1   13.70    8.20
  -1 -10  -1  128.89   49.70
  -1 -10  -1  130.19   50.89
  -2 -10  -1  172.28   60.39
  -2 -10  -1  147.49   60.29
  -3 -10  -1   13.90   18.80
   3  10   1  148.39   31.20
  -4 -10  -1   23.50   11.20
  -4 -10  -1    9.30   13.70
  -5 -10  -1    8.90   10.30
  -5 -10  -1   25.80   15.20
  -6 -10  -1   26.30   12.30
  -6 -10  -1   10.80   15.60
  -7 -10  -1   71.59   39.50
  -7 -10  -1  105.29   37.10
  -8 -10  -1   39.80   17.60
  -8 -10  -1   33.50   21.90
  -9 -10  -1   45.10   23.20
  -9 -10  -1   31.80   16.70
 -10 -10  -1    9.40   17.30
 -10 -10  -1    6.60    8.10
 -11 -10  -1    3.70   16.50
 -12 -10  -1    5.70   16.70
 -13 -10  -1    3.90   18.80
 -14 -10  -1   -1.10    6.50
 -14 -10  -1   -9.20   17.30
  13 -11  -1   18.00   17.10
 -13  11   1    8.90   10.30
  12 -11  -1   26.40   16.20
 -12  11   1   18.70   13.50
  11 -11  -1    1.30   12.20
 -11  11   1    3.80    9.80
  10 -11  -1   -7.30   10.60
 -10  11   1   -4.20    9.30
   9 -11  -1   10.80   13.80
  -9  11   1    3.80    9.50
   8 -11  -1   22.80   13.00
  -8  11   1    1.20    9.40
   7 -11  -1   -2.20   12.10
  -7  11   1   20.50    9.90
   6 -11  -1    1.50   10.70
  -6  11   1   15.10    9.80
   5 -11  -1   -6.40   10.10
  -5  11   1   -6.40    7.30
   4 -11  -1   10.60   11.90
   3 -11  -1   21.50   13.50
   2 -11  -1   -8.00    9.10
   1 -11  -1  -10.00    8.80
   0 -11  -1  -11.00    9.60
   0 -11  -1   -4.80    6.20
   0  11   1   18.30    7.40
  -1 -11  -1   -5.70    9.80
  -2 -11  -1    2.40    9.80
  -2 -11  -1   -2.50    9.30
  -3 -11  -1   23.10   15.20
  -4 -11  -1   -5.20   10.60
  -4 -11  -1    8.00    9.70
   4  11   1   18.30   17.00
  -5 -11  -1    0.40   10.00
  -5 -11  -1    4.80    8.50
  -6 -11  -1  -10.00   11.20
  -6 -11  -1    4.50    9.60
  -7 -11  -1   11.60   10.70
  -7 -11  -1   23.40   29.40
  -8 -11  -1   -8.20   13.70
  -8 -11  -1    0.60    8.10
  -9 -11  -1    6.90    8.60
  -9 -11  -1   13.40   16.10
 -10 -11  -1   25.50   11.10
 -10 -11  -1   -2.90   13.90
 -11 -11  -1    4.90   17.70
 -12 -11  -1   18.70   21.00
 -13 -11  -1   19.10   22.30
  12 -12  -1   38.50   23.30
 -12  12   1   41.60   19.30
  11 -12  -1   27.90   18.00
 -11  12   1   12.40   13.00
  10 -12  -1   38.00   18.70
 -10  12   1   17.30   14.00
   9 -12  -1   29.40   14.50
  -9  12   1   -3.60    9.30
   8 -12  -1   13.80   12.70
  -8  12   1    7.20   10.40
   7 -12  -1   18.20   12.70
  -7  12   1    7.70    8.80
   6 -12  -1   41.10   20.90
  -6  12   1   33.50   17.40
  -5  12   1    9.00   10.00
   4 -12  -1   81.39   36.00
   3 -12  -1   35.60   19.00
   2 -12  -1   17.90   17.60
   0 -12  -1   67.49   37.30
   0 -12  -1   96.59   35.90
   0  12   1   97.69   36.50
  -1 -12  -1   33.70   17.80
  -1 -12  -1   30.20   15.80
  -2 -12  -1    5.30   12.20
  -2 -12  -1   26.10   14.60
  -3 -12  -1   47.70   24.10
  -3 -12  -1   49.80   23.00
  -4 -12  -1  103.39   44.40
  -4 -12  -1  105.29   42.30
  -5 -12  -1   18.70   12.20
  -5 -12  -1   17.70   15.30
  -6 -12  -1   34.80   17.20
  -6 -12  -1   27.80   21.10
  -7 -12  -1    2.20   15.10
  -7 -12  -1   22.70   11.80
  -8 -12  -1   64.09   32.70
  -9 -12  -1   10.90    9.40
  -9 -12  -1   -8.40   15.30
 -10 -12  -1   16.70   13.10
 -10 -12  -1   44.30   24.60
 -11 -12  -1   19.60   21.70
 -12 -12  -1   18.40   22.20
  11 -13  -1    5.60   18.00
 -11  13   1   -0.70    9.30
  10 -13  -1   37.80   19.50
 -10  13   1    2.60   10.60
   9 -13  -1   10.80   12.30
  -9  13   1   -5.10    8.20
   8 -13  -1   24.80   13.50
  -8  13   1   -5.00    8.70
   7 -13  -1   22.70   15.10
  -7  13   1    4.00    9.40
   6 -13  -1   27.20   14.40
  -6  13   1   -7.80    8.80
   5 -13  -1   14.50   12.40
  -5  13   1    6.50   10.40
   4 -13  -1    4.60   13.50
   3 -13  -1   -7.20   11.00
   2 -13  -1  -12.60   10.60
   1 -13  -1    0.90   11.50
   0 -13  -1   -2.30   11.90
   0  13   1   16.60   10.00
  -1 -13  -1    7.50   12.90
  -1 -13  -1   17.00   10.80
  -2 -13  -1   -0.70   10.40
  -2 -13  -1  -11.90    9.70
  -3 -13  -1  -11.10    8.00
  -3 -13  -1   -7.70   11.80
  -4 -13  -1   13.00   11.50
  -4 -13  -1   10.10   13.80
  -5 -13  -1  -11.70    8.30
  -5 -13  -1   12.20   14.80
  -6 -13  -1    6.10   10.00
  -6 -13  -1   14.10   16.70
  -7 -13  -1   -6.10   15.20
  -7 -13  -1  -21.80    7.70
  -8 -13  -1   17.40   10.70
  -8 -13  -1    9.50   15.80
  -9 -13  -1   -4.30   14.00
  -9 -13  -1    7.00    8.00
 -10 -13  -1    5.70    7.30
 -10 -13  -1   -7.60   15.60
  10 -14  -1   28.50   15.30
 -10  14   1   -0.90   10.00
   9 -14  -1   60.69   19.50
  -9  14   1   10.70   12.30
   8 -14  -1   25.00   14.40
  -8  14   1   -4.60   10.10
   7 -14  -1    7.10   14.60
  -7  14   1    4.60    8.80
   6 -14  -1   -5.30   12.40
  -6  14   1  -11.90    9.20
   5 -14  -1  -11.40   10.70
  -5  14   1   29.10   12.40
   4 -14  -1   37.00   21.00
   3 -14  -1   53.59   26.10
   2 -14  -1    4.30   12.10
   1 -14  -1   10.30   13.30
   0 -14  -1    0.50   11.20
  -1 -14  -1   11.60    9.90
  -1 -14  -1   18.20   14.70
  -2 -14  -1   24.40   15.30
  -2 -14  -1   33.60   17.00
  -3 -14  -1    2.40   11.80
  -3 -14  -1   33.20   16.90
  -4 -14  -1   34.10   23.80
  -4 -14  -1   67.89   25.90
  -5 -14  -1   -9.30    9.80
  -5 -14  -1   40.90   17.20
  -6 -14  -1    1.60    9.60
  -6 -14  -1   16.70   17.70
  -7 -14  -1    9.40   10.70
  -7 -14  -1   19.40   21.10
  -8 -14  -1   27.00   23.10
  -9 -14  -1   50.79   20.30
  -9 -14  -1   27.90   23.80
 -10 -14  -1   10.40   10.10
 -10 -14  -1    1.10   16.70
   9 -15  -1    3.20   17.60
   8 -15  -1   16.10   16.20
  -8  15   1    6.40   10.50
   7 -15  -1   14.40   16.90
  -7  15   1    5.80    9.40
   6 -15  -1    4.70   13.30
  -6  15   1   -2.80    9.20
   5 -15  -1   14.90   14.00
  -5  15   1  -11.00   15.80
   4 -15  -1    7.20   14.20
   3 -15  -1  -15.10   17.80
   2 -15  -1  -27.20   11.70
   1 -15  -1   24.60   17.00
   0 -15  -1   14.40   13.70
  -1 -15  -1   19.10   15.50
  -2 -15  -1    8.10   10.90
  -2 -15  -1   -5.30   10.90
  -3 -15  -1    1.60   13.60
  -3 -15  -1   22.20   13.40
  -4 -15  -1   43.80   17.60
  -4 -15  -1   -4.40   12.50
  -5 -15  -1   10.90   16.50
  -5 -15  -1    2.80   10.60
  -6 -15  -1    9.30   16.70
  -7 -15  -1   20.00   17.20
  -7 -15  -1  -12.10    8.90
  -8 -15  -1    3.70    9.60
  -8 -15  -1    2.70   17.60
  -9 -15  -1   11.10   11.30
  -9 -15  -1   44.30   20.40
   7 -16  -1   58.89   23.00
  -7  16   1   18.10   16.30
   6 -16  -1   35.70   19.40
  -6  16   1   -0.40   10.90
   5 -16  -1   40.20   18.00
  -5  16   1    7.50   13.30
   4 -16  -1   -3.50   13.70
   3 -16  -1    0.80   14.30
   2 -16  -1   27.50   19.90
   1 -16  -1   20.60   15.70
   0 -16  -1  -11.10   11.20
  -1 -16  -1  -15.00   11.10
  -2 -16  -1   16.00   13.70
  -2 -16  -1   13.10   14.20
  -3 -16  -1   28.00   19.80
  -4 -16  -1   -6.70   11.20
  -4 -16  -1   11.40   17.30
  -5 -16  -1    6.80   11.50
  -5 -16  -1  -25.00   16.40
  -6 -16  -1    1.60   11.30
  -6 -16  -1    8.70   20.80
  -7 -16  -1    7.80   14.40
  -7 -16  -1   28.40   20.40
   4 -17  -1   -2.30   12.70
  -4  17   1   -4.00   10.10
   3 -17  -1   35.60   22.40
   2 -17  -1   28.30   20.00
   1 -17  -1   -2.90   12.80
   0 -17  -1    5.70   13.00
  -1 -17  -1   20.00   15.90
  -2 -17  -1  -11.70   11.20
  -3 -17  -1   30.10   19.90
  -4 -17  -1   -0.30   12.50
  -4 -17   2   14.40   18.90
  -4 -17   2   -2.80   11.50
  -3 -17   2  -12.90    8.80
  -3 -17   2   -7.30   18.30
  -2 -17   2   17.90   13.90
  -1 -17   2   27.90   20.70
   0 -17   2   -1.50   12.20
   1 -17   2    8.10   16.90
  -4  17  -2  -12.40   11.30
  -7 -16   2   10.70   21.30
  -7 -16   2   25.60   15.80
  -6 -16   2   -6.10   16.40
  -6 -16   2    9.00   11.60
  -5 -16   2   13.60   19.50
  -5 -16   2   -0.20   11.30
  -4 -16   2   10.80   12.70
  -4 -16   2    8.00   17.00
  -3 -16   2    6.10   16.00
  -3 -16   2   -3.60   13.30
  -2 -16   2   14.50   17.00
  -2 -16   2   25.50   17.70
  -1 -16   2   12.10   14.00
   0 -16   2   43.20   23.00
   1 -16   2   21.20   17.20
   2 -16   2   39.50   24.30
   3 -16   2    7.10   14.70
  -4  16  -2    0.70   11.60
   4 -16   2   24.30   17.10
  -5  16  -2    7.50   12.30
   5 -16   2    6.90   13.90
  -6  16  -2   19.40   13.00
   6 -16   2    5.20   15.70
  -7  16  -2    0.80   10.80
   7 -16   2    8.90   17.40
  -9 -15   2    2.30    8.60
  -9 -15   2   -1.70   18.10
  -8 -15   2   15.30   12.90
  -8 -15   2   12.00   19.80
  -7 -15   2   -2.60    9.20
  -7 -15   2   27.80   20.20
  -6 -15   2   17.40   18.00
  -5 -15   2  -13.60    9.20
  -5 -15   2   18.90   18.50
  -4 -15   2    6.70   15.50
  -4 -15   2  -12.10    8.50
  -3 -15   2   12.20   14.60
  -3 -15   2   18.20   13.80
  -2 -15   2    9.60   12.20
  -2 -15   2   14.90   14.20
  -1 -15   2   -7.20   10.00
   0 -15   2   16.90   14.90
   1 -15   2  -15.30   10.90
   2 -15   2   -2.00   12.60
   3 -15   2    0.40   12.10
   4 -15   2   -0.40   13.50
   5 -15   2    1.00   12.60
  -6  15  -2   -0.60   10.80
   6 -15   2   20.90   15.80
  -7  15  -2   -3.80   10.20
   7 -15   2   25.90   14.90
  -8  15  -2    6.00    8.90
   8 -15   2    3.00   14.00
   9 -15   2   -2.20   20.30
 -10 -14   2   37.70   29.10
  -9 -14   2   -6.00    8.40
  -9 -14   2   -0.60   16.20
  -8 -14   2    7.40   18.50
  -7 -14   2   11.10   16.90
  -7 -14   2   19.50   12.40
  -6 -14   2   10.80   17.20
  -6 -14   2   -1.40   10.40
  -5 -14   2    2.30   16.20
  -5 -14   2   19.70   12.90
  -4 -14   2   17.20   15.50
  -4 -14   2   11.40   12.20
  -3 -14   2   87.49   32.80
  -3 -14   2   55.69   30.50
  -2 -14   2   98.19   35.80
  -2 -14   2   63.59   34.80
  -1 -14   2    2.70   10.90
  -1 -14   2   18.30   11.70
   0 -14   2   19.40   14.00
   1 -14   2   -0.80    9.60
   2 -14   2   79.89   35.30
   3 -14   2   64.79   30.30
   4 -14   2   12.00   15.20
  -5  14  -2   -0.90    8.60
   5 -14   2   16.90   13.50
  -6  14  -2   11.30   12.20
   6 -14   2   24.30   15.80
  -7  14  -2   13.00   12.80
   7 -14   2   29.30   19.10
  -8  14  -2   10.20   11.70
   8 -14   2   44.90   18.00
  -9  14  -2   -6.40    9.00
   9 -14   2    4.10   15.10
 -10  14  -2   -2.90    9.30
  10 -14   2   62.09   19.70
 -11 -13   2    1.20   22.00
 -10 -13   2   16.40   17.90
  -9 -13   2    1.30    8.80
  -9 -13   2   16.70   18.10
  -8 -13   2  -12.00   14.80
  -8 -13   2   19.40   10.30
  -7 -13   2   -5.50    8.30
  -7 -13   2   48.00   19.80
  -6 -13   2    0.90   15.40
  -6 -13   2    0.60    8.90
   5  13  -2   12.40   12.20
  -5 -13   2    2.50   10.60
  -5 -13   2   -5.10   14.20
  -4 -13   2    5.10   10.90
  -4 -13   2    8.60   13.90
  -3 -13   2    6.10   10.90
  -3 -13   2  -12.20   10.80
  -2 -13   2    0.30    9.40
  -2 -13   2   -8.70   10.00
  -1 -13   2   -5.10    9.00
  -1 -13   2   -5.50    9.70
   0 -13   2    3.10   11.20
  -1  13  -2    1.20    8.00
   1 -13   2    0.40   10.60
   2 -13   2   -1.90   10.70
   3 -13   2   -1.60   10.90
   4 -13   2   11.20   15.00
  -5  13  -2   -0.40    8.70
   5 -13   2    3.90   10.60
  -6  13  -2   -6.80    9.10
   6 -13   2   -0.80   10.40
  -7  13  -2   -7.20    8.10
   7 -13   2   20.30   14.10
  -8  13  -2  -19.50    7.00
   8 -13   2    2.00   11.20
  -9  13  -2   20.30   15.50
   9 -13   2    1.50   13.50
 -10  13  -2   11.30   10.00
  10 -13   2   -2.50   12.50
 -11  13  -2   -1.30    9.40
  11 -13   2  -24.70   14.20
 -12 -12   2  -16.30   12.80
 -11 -12   2   51.79   30.70
 -10 -12   2   24.00   20.80
  -9 -12   2   56.49   27.80
  -9 -12   2   47.30   22.60
  -8 -12   2   11.70   17.00
  -8 -12   2    5.70    9.10
  -7 -12   2  -20.80   11.30
  -7 -12   2    9.70    9.40
  -6 -12   2   43.60   27.00
  -6 -12   2   43.30   20.80
  -5 -12   2  143.89   59.69
  -5 -12   2  166.78   62.59
  -4 -12   2   25.80   17.70
  -4 -12   2   27.30   14.90
  -3 -12   2    1.50   12.70
  -3 -12   2   -6.10    8.20
  -2 -12   2    9.20   12.60
  -2 -12   2    7.40   10.70
  -1 -12   2  161.78   62.69
  -1 -12   2  157.78   61.99
   0 -12   2  230.98   86.99
  -1  12  -2  143.29   54.19
   1 -12   2  136.49   56.09
   2 -12   2   16.00   13.70
   3 -12   2   -1.90   11.30
   4 -12   2   13.80   13.10
  -5  12  -2   86.89   35.60
   5 -12   2   92.39   37.60
  -6  12  -2   17.60   11.90
   6 -12   2   21.50   15.00
  -7  12  -2   -1.90    8.30
   7 -12   2   -5.80   11.80
  -8  12  -2   22.10   12.20
   8 -12   2    9.90   18.30
  -9  12  -2   40.30   24.70
   9 -12   2   90.19   28.70
 -10  12  -2   22.30   13.80
 -11  12  -2   40.00   19.30
  11 -12   2   40.10   21.40
 -12  12  -2   -3.90    8.50
  12 -12   2    5.10   18.80
 -13 -11   2   10.50   17.40
 -12 -11   2   -3.30   18.30
 -11 -11   2   -4.40   14.70
 -10 -11   2    4.60   16.60
  -9 -11   2    2.90    7.20
  -9 -11   2    5.40   15.70
  -8 -11   2   23.40   18.20
  -7 -11   2   -1.50   14.20
  -7 -11   2   -5.30    7.50
  -6 -11   2   -7.00    7.70
  -6 -11   2    1.00   12.90
  -5 -11   2   -0.10    8.00
  -5 -11   2   -9.00   10.80
   4  11  -2   50.29   24.50
  -4 -11   2   -7.60    8.20
  -4 -11   2    8.10   11.20
  -3 -11   2   -2.80    9.70
  -3 -11   2   -2.70    9.00
  -2 -11   2   10.00   10.00
  -2 -11   2    0.60    9.80
  -1 -11   2  -10.30    7.70
  -1 -11   2   -3.50    9.20
   0 -11   2    2.90    6.80
   0 -11   2   -6.70    8.80
  -1  11  -2    0.70    7.90
   1 -11   2   -7.40    8.90
  -2  11  -2    2.50    8.10
   2 -11   2   -4.60    9.30
   3 -11   2  -12.10    8.50
   4 -11   2    4.10   10.10
  -5  11  -2   -1.20    7.00
   5 -11   2   -7.10    8.70
  -6  11  -2    5.40    8.10
   6 -11   2  -13.30    9.40
  -7  11  -2   -8.40    7.40
   7 -11   2   15.10   11.50
  -8  11  -2   -6.20    7.50
   8 -11   2    2.10   11.70
  -9  11  -2    3.10    9.60
   9 -11   2   12.50   12.90
 -10  11  -2   -9.60    8.30
  10 -11   2  -19.20   10.30
 -11  11  -2    1.50    9.50
  11 -11   2    5.40   12.80
 -12  11  -2  -10.30    7.00
  12 -11   2   -2.30   12.40
 -13  11  -2   -0.60   10.00
  13 -11   2   37.40   17.70
 -14 -10   2   50.99   33.00
 -12 -10   2   22.80   22.60
 -11 -10   2    8.10   18.40
 -10 -10   2   37.90   24.50
  -9 -10   2    2.80   13.90
  -9 -10   2   -4.90    6.40
  -8 -10   2   47.00   25.60
  -8 -10   2   46.60   20.70
  -7 -10   2  149.99   59.89
  -7 -10   2  178.58   64.79
  -6 -10   2    5.90    8.90
  -6 -10   2   20.00   13.80
  -5 -10   2   23.80   11.90
  -5 -10   2   12.00   14.90
   4  10  -2   73.59   52.99
  -4 -10   2  155.88   50.29
  -4 -10   2  155.68   51.69
  -3 -10   2  286.17  111.19
  -3 -10   2  308.07  111.79
  -2 -10   2   73.69   32.50
  -2 -10   2   80.49   31.70
  -1 -10   2    8.30   10.60
  -1 -10   2    2.10    8.60
   0  10  -2  414.16  143.59
   0 -10   2  377.56  143.19
   0 -10   2  358.46  143.59
  -1  10  -2   12.90    9.10
   1 -10   2   10.70   10.60
  -2  10  -2   82.99   31.70
   2 -10   2   73.39   32.80
   3 -10   2  295.37  110.79
   4 -10   2  114.09   45.40
  -5  10  -2   23.30   11.90
   5 -10   2   20.90   13.80
  -6  10  -2    4.60    7.90
   6 -10   2   11.20   10.70
  -7  10  -2  124.09   58.79
   7 -10   2  197.48   60.69
  -8  10  -2   14.70   11.40
   8 -10   2   25.20   14.00
  -9  10  -2   15.20    8.30
  -9  10  -2   19.50   11.70
   9 -10   2    3.60   12.50
 -10  10  -2  -10.20    7.20
  10 -10   2    1.90   10.50
 -11  10  -2   17.20   13.10
 -11  10  -2   10.00   11.50
  11 -10   2   30.60   14.40
 -12  10  -2   44.60   14.00
 -12  10  -2  -15.90    7.90
  12 -10   2   10.70   14.00
 -13  10  -2   23.90   14.40
 -13  10  -2   -4.60   10.50
  13 -10   2   26.80   14.60
 -14  10  -2   26.10   15.90
  14 -10   2   49.00   26.00
 -14  -9   2   25.10   11.50
 -14  -9   2   15.30   18.90
 -13  -9   2  -16.60   14.30
 -13  -9   2  -12.20    7.10
 -12  -9   2    2.40    7.60
 -12  -9   2   -7.40   15.60
 -11  -9   2   -1.30   15.60
 -11  -9   2   -6.00    7.40
 -10  -9   2    2.80   15.70
  -9  -9   2  -12.90    5.40
  -9  -9   2    6.60   15.80
  -8  -9   2   -4.50    5.80
  -7  -9   2   -8.10   10.50
  -6  -9   2    2.80   11.30
  -6  -9   2  -10.30    5.60
  -5  -9   2    7.00   10.30
  -5  -9   2   -0.40    6.90
   4   9  -2   16.00   14.70
  -4  -9   2   -6.60    8.60
  -4  -9   2    0.40    6.40
   3   9  -2   20.10   14.50
  -3  -9   2   -1.00    8.40
  -3  -9   2   -1.90    7.20
  -2  -9   2    8.70    8.00
  -2  -9   2   -3.70    7.40
  -1  -9   2  -11.30    6.20
  -1  -9   2    6.00    7.80
   0   9  -2   11.70    6.70
   0  -9   2   -7.90    5.30
   0  -9   2    2.80    8.10
  -1   9  -2    4.60    6.50
   1  -9   2   -2.50    7.70
  -2   9  -2    9.90    6.80
   2  -9   2    4.20    8.30
  -3   9  -2    5.60    5.40
   3  -9   2    2.70    8.20
   4  -9   2   12.10   10.60
  -5   9  -2   -0.70    7.60
   5  -9   2   -5.30    8.00
  -6   9  -2   -0.10   10.70
   6  -9   2   -4.00    7.20
  -7   9  -2    5.20    6.60
  -7   9  -2    6.80    8.10
  -7   9  -2    4.20    8.30
   7  -9   2   17.40    9.70
  -8   9  -2    0.40    7.70
  -8   9  -2    6.20    5.90
  -8   9  -2    2.50    7.40
   8  -9   2   -7.80    7.50
  -9   9  -2    7.10    8.80
   9  -9   2    3.10   10.20
 -10   9  -2   13.00   11.60
 -10   9  -2   -1.10    8.70
  10  -9   2   -5.10    9.20
 -11   9  -2   11.60   11.60
 -11   9  -2   30.90   14.70
  11  -9   2    9.90   12.30
 -12   9  -2   -6.80    8.20
 -12   9  -2    9.20   13.70
  12  -9   2   14.60   12.50
 -13   9  -2    5.40   10.10
 -13   9  -2   24.60   16.10
  13  -9   2    1.90   12.60
 -14   9  -2   17.20   11.80
 -14   9  -2   14.80   16.40
  14  -9   2    2.30   14.40
 -15  -8   2   41.30   22.20
 -15  -8   2   61.79   33.40
 -14  -8   2   -2.60   17.90
 -14  -8   2    8.20    8.80
 -13  -8   2   20.80   13.10
 -13  -8   2   42.00   24.00
 -12  -8   2    7.90   15.00
 -12  -8   2    4.10    8.20
 -11  -8   2   74.29   32.90
 -11  -8   2  110.79   40.60
 -10  -8   2   16.60   15.50
 -10  -8   2    5.20    7.70
  -9  -8   2    1.40   13.20
  -9  -8   2    1.70    6.40
  -8  -8   2  287.97   84.19
  -8  -8   2  180.28   77.69
  -8  -8   2  216.48   78.09
  -7  -8   2   68.09   34.90
  -7  -8   2   94.09   33.30
  -6  -8   2   52.79   22.10
  -6  -8   2   52.19   24.70
  -5  -8   2  181.88   63.79
  -5  -8   2  146.99   61.49
   4   8  -2   61.29   22.20
  -4  -8   2   40.60   21.60
  -4  -8   2   39.50   19.70
  -3  -8   2  175.08   66.09
  -3  -8   2  172.58   65.39
   2   8  -2   24.00   15.90
  -2  -8   2   22.90   12.20
  -2  -8   2   25.80   14.40
   1   8  -2    8.30    6.70
  -1  -8   2    1.50    7.40
  -1  -8   2   -0.80    7.50
   0   8  -2    5.90    6.30
   0  -8   2    4.10    6.60
   0  -8   2    5.70    7.80
  -1   8  -2    2.50    6.30
   1  -8   2   14.70    8.70
   1  -8   2    6.00    5.90
  -2   8  -2   20.40   11.30
   2  -8   2   34.30   13.10
  -3   8  -2  200.98   72.99
   3  -8   2  184.88   73.49
  -4   8  -2   43.00   16.60
   4  -8   2   32.60   17.90
  -5   8  -2  105.89   41.40
  -5   8  -2  122.39   42.50
  -5   8  -2  101.49   41.10
   5  -8   2  138.59   43.50
  -6   8  -2   47.20   22.40
  -6   8  -2   58.79   22.60
   6  -8   2   57.69   23.50
  -7   8  -2   73.29   32.90
  -7   8  -2   78.39   33.30
   7  -8   2  107.69   34.50
  -8   8  -2  229.78   87.49
  -8   8  -2  216.08   87.69
   8  -8   2  255.97   87.59
  -9   8  -2   22.70   10.60
  -9   8  -2   -6.50   11.40
   9  -8   2   29.60   11.20
 -10   8  -2   34.60   12.40
 -10   8  -2    7.70   14.60
  10  -8   2   17.60   12.00
 -11   8  -2   49.20   33.60
 -11   8  -2  130.29   38.70
  11  -8   2  106.49   35.70
 -12   8  -2    1.10    8.10
 -12   8  -2   14.30   14.50
  12  -8   2   22.10   12.10
 -13   8  -2   -0.10    9.00
 -13   8  -2   12.40   16.80
  13  -8   2   49.30   14.80
  14  -8   2   36.40   18.70
 -15   8  -2   31.10   20.70
 -15   8  -2   24.80   16.60
  15  -8   2   49.99   21.20
 -15  -7   2   12.00    7.30
 -15  -7   2   -4.20   15.80
 -14  -7   2  -13.00   12.70
 -14  -7   2    5.40    8.00
 -13  -7   2   -5.30    7.40
 -13  -7   2   -5.60   14.80
 -12  -7   2  -12.00   12.60
 -12  -7   2   -5.50    5.40
 -11  -7   2    1.80    5.90
 -11  -7   2   -2.50   12.00
 -10  -7   2    8.60   13.10
 -10  -7   2   -0.80    5.70
  -9  -7   2    0.40   12.20
  -9  -7   2    2.50    6.30
  -8  -7   2  -10.50   10.50
  -8  -7   2   -2.20    5.10
  -8  -7   2   -8.80    5.10
  -7  -7   2    1.70    5.70
  -7  -7   2   -5.80    8.80
  -7  -7   2   -5.50    4.50
  -6  -7   2    0.80    9.10
  -6  -7   2   -9.30    5.00
  -5  -7   2   17.40    8.10
  -5  -7   2    1.50    9.90
   4   7  -2    3.90    8.50
  -4  -7   2    5.50    6.50
  -4  -7   2    4.30    8.20
   3   7  -2   10.00   10.20
  -3  -7   2   -7.80    6.80
  -3  -7   2   -4.30    5.30
  -2  -7   2   -6.40    6.00
  -2  -7   2    0.40    5.50
   1   7  -2  -10.70   11.90
   1   7  -2  -10.90    5.00
  -1  -7   2   -4.00    5.60
  -1  -7   2    2.40    6.40
   0   7  -2   -5.20    9.70
   0  -7   2   10.10    7.80
   0  -7   2    5.20    5.80
  -1   7  -2    0.20    4.40
   1  -7   2    2.70    6.50
   1  -7   2    2.20    4.60
  -2   7  -2   -1.00    4.90
   2  -7   2   -0.20    6.40
  -3   7  -2   -7.70    3.90
   3  -7   2  -13.10    6.00
  -4   7  -2   -3.00    4.30
  -4   7  -2    2.40    5.90
   4  -7   2   -5.90    6.20
  -5   7  -2    6.80    5.90
  -5   7  -2    3.00    5.00
  -5   7  -2   -6.70    5.40
   5  -7   2   14.60    6.70
  -6   7  -2   -0.70    6.60
  -6   7  -2    4.20    6.90
   6  -7   2    4.90    7.00
  -7   7  -2    4.70    6.70
  -7   7  -2   -0.60    7.50
   7  -7   2  -17.20    6.40
  -8   7  -2   24.00    9.30
   8  -7   2    3.80    8.40
  -9   7  -2    5.10   10.50
  -9   7  -2    1.70    8.00
   9  -7   2    8.20    8.40
 -10   7  -2   -7.50    6.80
 -10   7  -2  -10.60    9.10
  10  -7   2    5.00    8.20
 -11   7  -2    1.30   11.20
 -11   7  -2   -8.60    6.60
  11  -7   2    6.30    9.50
 -12   7  -2   -8.60   13.50
 -12   7  -2    2.60    7.40
  12  -7   2   13.10   10.10
 -13   7  -2    0.90   13.30
 -13   7  -2   -1.60    8.10
  13  -7   2   -5.80    9.60
 -14   7  -2    5.80   17.40
 -14   7  -2    7.10    9.70
  14  -7   2   15.80   12.80
 -15   7  -2   24.20   16.90
 -15   7  -2   -4.10   10.30
  15  -7   2   12.50   12.90
 -16  -6   2   72.99   32.00
 -16  -6   2   45.00   21.60
 -15  -6   2   25.30   13.20
 -15  -6   2   33.90   22.60
 -14  -6   2   13.40    9.80
 -14  -6   2   28.10   21.20
 -13  -6   2   24.90   20.40
 -13  -6   2   16.00    9.70
 -12  -6   2   24.60   12.70
 -12  -6   2   33.50   21.80
 -11  -6   2   32.30   21.60
 -11  -6   2   29.30   13.50
 -10  -6   2  101.99   40.60
 -10  -6   2  116.19   46.50
  -9  -6   2  175.98   71.69
  -9  -6   2  275.07   78.79
  -8  -6   2   22.00   15.50
  -8  -6   2   19.30    9.80
  -7  -6   2   52.39   24.40
  -7  -6   2   67.29   25.10
  -7  -6   2   75.59   28.90
  -6  -6   2  109.89   40.60
  -6  -6   2  102.89   40.30
  -6  -6   2  108.79   43.40
  -5  -6   2   24.80   10.30
  -5  -6   2   21.10   12.90
  -5  -6   2   19.70   10.70
  -4  -6   2  235.88   89.69
  -4  -6   2  240.18   88.89
   3   6  -2  213.88   93.79
  -3  -6   2  293.97   93.79
  -3  -6   2  273.57   94.49
   2   6  -2  202.68   61.09
   2   6  -2  127.79   60.79
  -2  -6   2  138.39   60.69
  -2  -6   2  199.78   60.59
   1   6  -2  149.88   58.89
  -1  -6   2  160.48   58.69
  -1  -6   2  158.48   58.89
   0   6  -2  172.48   62.39
   0  -6   2  176.38   62.49
   0  -6   2  153.98   62.19
  -1   6  -2  154.58   53.69
  -1   6  -2   78.29   57.69
   1  -6   2  141.09   53.39
   1  -6   2  160.88   53.99
  -2   6  -2  188.58   71.49
  -2   6  -2  191.08   72.09
   2  -6   2  197.28   71.79
  -3   6  -2  285.97  114.49
  -3   6  -2  330.67  114.19
   3  -6   2  293.47  114.49
  -4   6  -2  216.58   89.19
  -4   6  -2  243.88   88.99
   4  -6   2  251.47   89.29
  -5   6  -2   20.20   11.70
  -5   6  -2   24.00   11.90
   5  -6   2   37.00   12.70
  -6   6  -2  107.59   42.10
  -6   6  -2  114.69   42.50
  -7   6  -2   37.90   22.80
  -7   6  -2   88.09   25.30
   7  -6   2   55.79   23.60
  -8   6  -2   33.00   14.80
  -8   6  -2   40.60   17.30
   8  -6   2   27.10   14.90
  -9   6  -2  217.88   79.59
  -9   6  -2  195.48   78.39
   9  -6   2  212.88   78.49
 -10   6  -2  120.79   46.10
 -10   6  -2  108.29   48.40
  10  -6   2  124.99   46.50
 -11   6  -2   40.60   18.20
 -11   6  -2   27.20   22.80
  11  -6   2   51.79   19.60
 -12   6  -2   17.90   15.20
 -12   6  -2   17.60   11.20
  12  -6   2   16.10   11.50
 -13   6  -2   12.20   12.00
 -13   6  -2   19.10   18.90
  13  -6   2   33.20   13.60
 -14   6  -2   28.60   17.00
 -14   6  -2   33.40   22.50
  14  -6   2   43.20   19.70
 -15   6  -2   28.20   20.50
 -15   6  -2   -8.70   18.10
  15  -6   2   24.60   14.40
 -16   6  -2   31.50   20.80
 -16   6  -2   80.89   28.90
 -16  -5   2   31.00   13.80
 -16  -5   2   27.60   23.40
 -15  -5   2    5.70    7.20
 -15  -5   2    5.00   15.30
 -14  -5   2    1.70   18.00
 -14  -5   2   21.20   10.10
 -13  -5   2    2.50    6.40
 -13  -5   2   11.60   16.30
 -12  -5   2   24.40   18.70
 -12  -5   2    3.10    6.50
 -11  -5   2   -2.40   12.80
 -10  -5   2    3.90   12.30
 -10  -5   2  -15.10    4.20
  -9  -5   2    7.20   12.20
  -9  -5   2   -4.00    4.30
  -8  -5   2  -12.50    3.60
  -8  -5   2   -0.40   11.00
  -7  -5   2   -1.50    4.00
  -7  -5   2    0.00    9.10
  -6  -5   2   -2.70    7.90
  -6  -5   2    0.10    4.30
  -6  -5   2    2.20    4.40
  -5  -5   2   -8.30    7.00
  -5  -5   2    1.30    4.70
  -5  -5   2   -1.10    4.10
  -4  -5   2   -8.30    3.90
  -4  -5   2   -2.80    7.10
  -4  -5   2    0.10    5.00
   3   5  -2   -3.70    7.40
   3   5  -2    6.30    7.70
  -3  -5   2   -6.70    5.90
  -3  -5   2    1.20    5.20
   2   5  -2    0.20    6.40
   2   5  -2    2.20    3.20
   2   5  -2    0.30    9.50
  -2  -5   2    2.40    6.80
  -2  -5   2   -1.50    5.60
   1   5  -2   -7.70    5.10
   1   5  -2    2.70    5.70
   1   5  -2    9.60   12.10
  -1  -5   2   -2.20    5.20
  -1  -5   2   -5.20    5.20
   0   5  -2    2.40   12.30
   0   5  -2   -2.10    5.20
   0   5  -2    1.80    4.90
   0  -5   2   -3.50    4.90
   0  -5   2   -0.80    5.90
  -1   5  -2    9.50    5.60
  -1   5  -2    0.20    4.70
  -1   5  -2  -15.30   12.10
   1  -5   2   -5.80    5.70
   1  -5   2    5.80    4.60
  -2   5  -2   -1.40    4.30
  -2   5  -2    9.50   14.70
  -2   5  -2   -3.70    4.90
   2  -5   2    6.00    6.10
  -3   5  -2    4.20    5.10
  -3   5  -2    1.50    4.40
   3  -5   2    9.30    6.00
  -4   5  -2    1.00    5.00
  -4   5  -2    1.00    5.40
   4  -5   2   17.40    6.80
  -5   5  -2   -3.00    3.70
  -5   5  -2   -1.30    5.70
  -5   5  -2   -5.60    5.00
   5  -5   2    4.70    5.20
  -6   5  -2  -11.50    4.10
  -6   5  -2   -0.70    6.20
   6  -5   2    0.50    5.80
  -7   5  -2    0.20    7.20
  -7   5  -2    2.00    5.40
   7  -5   2    1.30    5.60
  -8   5  -2   -1.90    8.30
  -8   5  -2   -7.40    4.80
   8  -5   2   -0.10    5.90
  -9   5  -2   -8.90    5.50
  -9   5  -2   -6.20    8.00
   9  -5   2  -12.80    5.20
 -10   5  -2   28.20   15.20
  10  -5   2   12.40   10.40
 -11   5  -2    1.10   12.20
 -11   5  -2    4.10    6.80
  11  -5   2   -6.70    7.90
 -12   5  -2   -9.40    6.60
 -12   5  -2    6.20   12.70
  12  -5   2   -1.90    7.30
 -13   5  -2    2.20   12.70
 -13   5  -2    8.10    9.40
  13  -5   2   19.60   11.30
 -14   5  -2   -9.90    8.40
 -14   5  -2   18.50   17.00
  14  -5   2   -0.80   10.10
 -15   5  -2    4.20   16.80
 -15   5  -2   -9.10    8.20
  15  -5   2   -9.90   10.90
 -16   5  -2   37.90   20.10
  16  -5   2    9.20   21.90
 -16  -4   2   28.70   29.80
 -16  -4   2   74.09   24.40
 -15  -4   2   55.89   23.00
 -15  -4   2   58.49   32.90
 -14  -4   2    6.40   16.10
 -14  -4   2   14.30    8.30
 -13  -4   2   17.90   21.90
 -13  -4   2   44.90   16.00
 -12  -4   2   39.70   23.30
 -12  -4   2   28.80   13.60
 -11  -4   2  146.39   53.39
 -11  -4   2  125.39   58.49
 -10  -4   2  242.08   83.69
 -10  -4   2  206.68   80.19
  -9  -4   2   -5.50   10.80
  -9  -4   2    5.80    4.80
  -8  -4   2    9.40   11.60
  -8  -4   2    5.20    5.10
  -7  -4   2   83.19   32.00
  -7  -4   2   86.69   35.70
  -6  -4   2  134.59   51.99
  -6  -4   2  150.68   53.99
  -5  -4   2  316.37  117.19
  -5  -4   2  305.67  118.09
  -5  -4   2  320.57  116.99
   4   4  -2  512.25  176.48
  -4  -4   2  492.05  177.58
  -4  -4   2  463.15  176.58
  -4  -4   2  433.66  177.38
   3   4  -2   56.19   23.30
   3   4  -2   72.29   24.60
   3   4  -2   72.89   25.70
  -3  -4   2   67.19   24.20
  -3  -4   2   47.60   24.90
  -3  -4   2   60.49   23.60
   2   4  -2  607.34  247.68
   2   4  -2  729.73  248.08
  -2  -4   2  694.53  247.98
  -2  -4   2  664.53  248.18
   1   4  -2  297.27  112.49
   1   4  -2  304.27  112.69
  -1  -4   2  307.97  112.49
  -1  -4   2  301.97  112.69
   0   4  -2   29.10   31.70
   0   4  -2   89.39   29.30
   0   4  -2   87.89   29.30
   0  -4   2   71.69   29.10
   0  -4   2   79.39   29.10
  -1   4  -2  354.46  122.19
  -1   4  -2  317.47  122.19
   1  -4   2  314.17  122.09
   1  -4   2  332.87  122.29
  -2   4  -2  680.13  259.17
  -2   4  -2  705.53  259.07
   2  -4   2  715.13  259.17
  -3   4  -2   76.39   24.90
  -3   4  -2   43.50   24.40
   3  -4   2   72.29   24.80
  -4   4  -2  470.35  177.08
  -4   4  -2  507.75  176.98
   4  -4   2  454.35  176.98
  -5   4  -2  309.37  122.79
  -5   4  -2  340.87  123.09
   5  -4   2  338.37  122.69
  -6   4  -2  138.89   54.09
  -6   4  -2  161.48   53.49
   6  -4   2  132.09   53.29
  -7   4  -2   46.00   25.70
  -7   4  -2   52.99   22.90
   7  -4   2   70.69   23.40
  -8   4  -2    1.60    4.90
  -8   4  -2   12.90   10.20
   8  -4   2    4.10    5.90
  -9   4  -2   22.90   12.40
  -9   4  -2    9.40    8.90
   9  -4   2   22.10    9.80
 -10   4  -2  264.47   89.49
 -10   4  -2  217.08   91.09
  10  -4   2  232.98   89.39
 -11   4  -2  128.19   53.99
 -11   4  -2  134.69   50.79
  11  -4   2  134.19   51.49
 -12   4  -2   35.30   16.70
 -12   4  -2   64.59   24.20
  12  -4   2   29.70   17.40
 -13   4  -2   49.40   24.80
 -13   4  -2   32.20   17.00
  13  -4   2   39.80   18.10
 -14   4  -2   33.10   19.40
 -14   4  -2    1.60    9.70
  14  -4   2   17.90   11.40
 -15   4  -2   64.89   37.50
 -15   4  -2   71.29   30.80
  15  -4   2   91.59   33.00
 -16   4  -2   22.40   20.50
 -16   4  -2   12.50   13.00
 -17  -3   2   18.90   36.60
 -17  -3   2  113.69   33.00
 -16  -3   2   31.70   13.90
 -15  -3   2   10.50    7.50
 -15  -3   2   18.70   17.10
 -14  -3   2   22.40    7.50
 -14  -3   2  -19.50   13.60
 -13  -3   2   10.10   15.20
 -13  -3   2    6.90    5.80
 -12  -3   2    6.70    5.10
 -12  -3   2  -10.20   12.50
 -11  -3   2   -1.70    4.00
 -10  -3   2   -7.90    3.40
 -10  -3   2   10.50   12.40
  -9  -3   2   -5.40    3.20
  -9  -3   2   -3.50   10.90
  -9  -3   2   -2.50    9.00
  -8  -3   2   -4.70    2.90
  -8  -3   2   -7.70    8.50
  -7  -3   2    2.40    3.20
  -7  -3   2    5.00    8.30
  -7  -3   2   -4.10    7.60
  -6  -3   2    3.40    8.10
  -6  -3   2   -7.10    2.90
  -6  -3   2    5.70    7.00
   5   3  -2   -0.90    3.40
  -5  -3   2   -6.90    2.90
  -5  -3   2   -5.50    7.50
   4   3  -2    3.90    4.50
   4   3  -2   -6.80    6.30
   4   3  -2   -3.50    2.80
  -4  -3   2    5.70    7.30
  -4  -3   2    8.20    4.50
  -4  -3   2   -2.10    3.40
   3   3  -2   -2.00    2.60
   3   3  -2    3.60    6.90
   3   3  -2    1.30    5.00
  -3  -3   2   14.60    7.70
  -3  -3   2   -1.00    3.50
  -3  -3   2   -4.90    3.80
   2   3  -2    2.40    6.10
   2   3  -2   -0.80    5.00
   2   3  -2    3.10    3.00
  -2  -3   2    2.20    4.60
  -2  -3   2    2.40    3.50
  -2  -3   2   -2.40    5.50
   1   3  -2    4.50    5.50
   1   3  -2   -1.00    5.00
  -1  -3   2   -1.40    4.90
  -1  -3   2   -3.20    5.00
   0   3  -2   -1.80    4.50
   0   3  -2    8.10    5.30
   0  -3   2   -1.10    4.60
   0  -3   2   -4.50    4.40
  -1   3  -2   -7.60   12.70
  -1   3  -2   -2.20    4.00
  -1   3  -2    1.00    4.40
   1  -3   2   19.40    5.60
  -2   3  -2  -15.40   10.70
  -2   3  -2    7.90    4.70
   2  -3   2   -1.90    4.40
  -3   3  -2    1.20    4.80
  -3   3  -2    1.20   11.60
  -3   3  -2   -3.40    3.80
   3  -3   2   -1.70    4.40
  -4   3  -2   -6.10    3.90
  -4   3  -2   -3.50    5.00
  -4   3  -2   -1.60   14.00
   4  -3   2    0.70    4.20
   4  -3   2   -2.90    3.30
  -5   3  -2   -1.70    4.10
  -5   3  -2   -7.70    6.00
   5  -3   2    7.80    4.90
  -6   3  -2    7.00    4.50
  -6   3  -2    3.50    7.60
   6  -3   2    0.20    4.30
  -7   3  -2   -1.50    8.10
  -7   3  -2   -2.40    3.70
   7  -3   2   -2.20    4.20
  -8   3  -2   -6.90    7.20
  -8   3  -2    2.20    4.30
   8  -3   2   -7.60    4.10
  -9   3  -2   -2.20    4.40
  -9   3  -2   -3.60    8.00
   9  -3   2    7.90    5.40
 -10   3  -2   -4.70   10.50
 -10   3  -2   -7.90    4.80
  10  -3   2    3.50    5.70
 -11   3  -2    3.50    7.40
 -11   3  -2    8.20   11.90
  11  -3   2    3.00    7.20
 -12   3  -2    7.20    7.30
 -12   3  -2    8.40   14.50
  12  -3   2    0.80    7.70
 -13   3  -2    0.20    7.10
 -13   3  -2   -7.70   13.00
  13  -3   2    5.80    7.40
 -14   3  -2    5.00   14.90
 -14   3  -2    0.70    7.10
  14  -3   2    0.30    9.10
 -15   3  -2   -0.30   14.70
 -15   3  -2  -13.90    8.30
  15  -3   2    8.40   11.60
 -16   3  -2   18.10   13.70
 -16   3  -2   19.80   20.00
 -17   3  -2  -30.10    8.70
 -17   3  -2    5.70   16.80
  17  -3   2   10.00   16.70
 -17  -2   2  141.19   37.40
 -17  -2   2   22.80   40.00
 -16  -2   2   43.20   15.50
 -16  -2   2   15.60   22.60
 -15  -2   2   -1.90   15.60
 -15  -2   2   20.80    8.70
 -14  -2   2   26.00   12.50
 -14  -2   2   36.20   21.90
 -13  -2   2    6.50    5.20
 -13  -2   2  -15.50   12.10
 -12  -2   2   88.19   32.10
 -12  -2   2   50.49   23.50
 -11  -2   2   67.49   41.60
 -11  -2   2  106.79   36.90
 -10  -2   2   86.09   31.70
 -10  -2   2   60.49   25.10
  -9  -2   2  110.39   43.40
  -9  -2   2  110.79   45.00
  -9  -2   2  177.68   50.29
  -8  -2   2   24.80   18.20
  -8  -2   2   30.30   18.80
  -8  -2   2   40.70   14.00
   7   2  -2   67.19   22.40
  -7  -2   2   38.40   17.20
  -7  -2   2   39.80   20.90
  -7  -2   2   54.09   21.70
   6   2  -2  275.67   93.29
  -6  -2   2  227.38   93.99
  -6  -2   2  231.08   92.39
  -6  -2   2  258.37   93.19
   5   2  -2  564.54  200.58
   5   2  -2  523.05  200.38
  -5  -2   2  553.34  200.48
  -5  -2   2  520.35  200.08
  -5  -2   2  543.15  201.18
   4   2  -2  225.98   89.29
   4   2  -2  247.88   88.79
   4   2  -2  236.68   88.59
  -4  -2   2  260.87   89.59
  -4  -2   2  239.78   88.29
  -4  -2   2  227.08   88.59
   3   2  -2    5.10    3.70
   3   2  -2   18.00    8.10
   3   2  -2    8.90    5.20
   3   2  -2   -1.30    8.70
  -3  -2   2    9.30    7.40
  -3  -2   2   14.60    8.20
  -3  -2   2    6.40    4.70
  -3  -2   2    5.30    4.00
   2   2  -2 1624.04  562.54
   2   2  -2 1591.64  562.74
   2   2  -2 1430.66  562.94
  -2  -2   2 1520.05  562.64
  -2  -2   2 1448.06  562.94
  -2  -2   2 1510.95  562.54
   1   2  -2  683.93  284.57
   1   2  -2  797.72  284.77
   1   2  -2  808.22  284.97
  -1  -2   2  754.62  284.87
  -1  -2   2  817.82  284.77
   0   2  -2  337.67  124.39
   0   2  -2  324.97  124.49
   0  -2   2  339.77  124.49
   0  -2   2  342.17  124.39
  -1   2  -2  773.92  294.87
   1  -2   2  821.92  294.87
  -2   2  -2 1547.25  596.34
  -2   2  -2 1733.83  596.24
   2  -2   2 1558.44  596.24
  -3   2  -2    9.50    7.30
  -3   2  -2    7.40   15.00
   3  -2   2   16.10    7.20
   3  -2   2   24.90    7.60
  -4   2  -2  267.37   83.19
  -4   2  -2  202.78   82.39
   4  -2   2  185.58   82.39
   4  -2   2  243.98   82.39
  -5   2  -2  512.45  167.28
  -5   2  -2  472.65  166.48
  -5   2  -2  361.36  167.68
  -6   2  -2  235.98   94.59
  -6   2  -2  262.77   93.59
  -7   2  -2   36.90   18.40
  -7   2  -2   38.60   15.10
  -8   2  -2   46.80   17.90
  -8   2  -2   41.20   21.70
  -9   2  -2  203.58   69.49
  -9   2  -2  166.38   65.19
 -10   2  -2   86.59   31.90
 -10   2  -2   73.59   35.70
 -11   2  -2  124.29   47.40
 -11   2  -2  128.59   52.09
 -12   2  -2   92.39   36.40
 -12   2  -2  101.79   41.90
 -13   2  -2    6.90    7.70
 -13   2  -2   10.00   15.60
 -14   2  -2   31.40   15.80
 -14   2  -2   40.90   23.40
  14  -2   2   37.90   17.30
 -15   2  -2   -7.40    8.20
 -15   2  -2   -0.30   15.80
  15  -2   2    5.80   10.10
 -16   2  -2    3.70    9.60
 -16   2  -2   -3.50   16.60
  16  -2   2   17.90   13.10
 -17   2  -2   14.90   11.90
  17  -2   2   15.10   15.70
 -17  -1   2   52.69   19.10
 -17  -1   2   27.30   26.70
 -16  -1   2    3.40   16.70
 -16  -1   2   14.30    7.90
 -15  -1   2   29.10   11.90
 -15  -1   2   11.90   18.80
 -14  -1   2   21.80   10.00
 -14  -1   2   11.00   17.40
 -13  -1   2    3.20    5.70
 -13  -1   2   -1.30   14.30
 -12  -1   2   12.60   15.70
 -11  -1   2    3.20    5.50
 -11  -1   2    1.90   12.20
 -10  -1   2    5.70   12.50
 -10  -1   2    3.80    4.70
  -9  -1   2   -8.60    3.90
  -9  -1   2    4.10   10.70
  -8  -1   2   10.70   13.20
  -8  -1   2   -0.80    3.40
  -8  -1   2  -11.20    8.50
   7   1  -2    9.30   13.30
  -7  -1   2    4.30    3.40
  -7  -1   2   -2.90    8.10
  -7  -1   2  -13.60   11.90
   6   1  -2    0.10   10.20
   6   1  -2    0.70    3.30
   6   1  -2    2.00    4.00
  -6  -1   2   29.50   14.20
  -6  -1   2    5.00    7.90
  -6  -1   2   -0.90    3.90
   5   1  -2   -9.10    9.80
   5   1  -2   16.10    8.10
   5   1  -2   -1.00    2.40
   5   1  -2   -0.10    3.00
  -5  -1   2   -5.40   11.40
  -5  -1   2   -0.90    7.20
  -5  -1   2    3.70    3.00
   4   1  -2    2.60    6.70
   4   1  -2   -5.30    9.70
   4   1  -2   -5.20    1.90
   4   1  -2    2.20    3.30
  -4  -1   2    8.60   11.80
  -4  -1   2    0.90    7.40
  -4  -1   2    0.90    2.30
   3   1  -2   -2.60    6.00
   3   1  -2   -1.30   10.20
   3   1  -2    5.70    2.20
   3   1  -2   -0.80    3.20
  -3  -1   2   -4.40    2.20
  -3  -1   2    3.00    7.00
  -3  -1   2   -1.30    9.40
   2   1  -2   -6.30    4.60
   2   1  -2   -3.50    2.40
   2   1  -2    2.30    8.00
   2   1  -2    1.30    1.70
  -2  -1   2   -2.60    6.70
  -2  -1   2   -3.70    1.70
  -2  -1   2    1.20    4.90
   1   1  -2    0.00    1.20
   1   1  -2   -3.40    4.90
   1   1  -2    2.00    3.40
   1   1  -2   -1.60    2.10
  -1  -1   2   -1.60    1.90
  -1  -1   2    1.60    1.60
  -1  -1   2    2.10    3.30
  -1  -1   2    2.40    6.00
   0  -1   2    1.90    1.50
   0  -1   2   -1.70    2.00
  -1   1  -2   -1.40    2.10
  -1   1  -2    0.40    1.80
   1  -1   2    1.70    1.80
   1  -1   2    0.40    1.80
  -2   1  -2    0.40    2.60
   2  -1   2   -2.00    2.00
  -3   1  -2   -4.50    5.80
  -3   1  -2    7.90   12.20
  -3   1  -2   -1.10    2.80
   3  -1   2    2.30    2.70
  -4   1  -2   -2.40    6.60
  -4   1  -2    1.90    2.70
  -4   1  -2    7.90   12.90
   4  -1   2   -2.20    2.40
  -5   1  -2   10.40    8.10
  -5   1  -2    0.20    2.90
  -5   1  -2    1.60   13.70
   5  -1   2   -0.70    2.60
  -6   1  -2    0.50    7.50
  -6   1  -2  -13.30   12.90
  -6   1  -2    5.00    3.50
  -7   1  -2    9.60    4.90
  -7   1  -2    4.30    8.90
  -8   1  -2    2.40    3.80
  -8   1  -2   -6.20    6.80
  -9   1  -2    3.40    4.70
  -9   1  -2    9.60    9.80
 -10   1  -2   -8.30    9.40
 -10   1  -2    5.10    5.00
 -11   1  -2    6.90   13.30
 -11   1  -2   10.70    6.80
 -12   1  -2   17.00    6.90
 -12   1  -2  -11.30    9.70
 -13   1  -2   15.00   14.80
 -13   1  -2    0.40    7.10
 -14   1  -2    8.30   17.30
 -14   1  -2    7.90    8.10
 -15   1  -2    6.60   16.80
 -15   1  -2   -8.60    7.10
 -16   1  -2   -1.00   16.40
 -16   1  -2   -2.20    8.30
 -17   1  -2   40.80   15.40
 -17   1  -2   17.10   22.90
  17  -1   2   27.60   17.70
 -17   0   2   53.49   31.20
 -16   0   2   62.19   22.70
 -16   0   2   36.10   29.90
 -15   0   2    7.40    7.60
 -15   0   2   -1.90   16.00
 -14   0   2    6.80   15.30
 -14   0   2    2.60    6.70
 -13   0   2    8.50    7.30
 -13   0   2   11.90   15.20
 -11   0   2   -0.90    5.20
 -11   0   2   -2.20   11.00
 -10   0   2   35.50   14.40
 -10   0   2   34.90   19.50
  -9   0   2  146.69   55.19
  -9   0   2  153.38   59.29
   8   0  -2  114.19   36.70
  -8   0   2   88.99   34.50
  -8   0   2   72.99   30.50
   7   0  -2   85.39   27.40
  -7   0   2   46.90   20.40
  -7   0   2   66.19   27.20
  -7   0   2   53.09   23.70
   6   0  -2   -2.60   12.60
   6   0  -2    4.30    3.70
  -6   0   2    1.40    7.80
  -6   0   2   -8.20   13.50
  -6   0   2   14.00    4.20
   5   0  -2  234.98   78.09
   5   0  -2  172.58   76.59
   5   0  -2  209.28   77.69
  -5   0   2  250.57   78.19
  -5   0   2  198.08   77.79
   4   0  -2  385.26  160.08
   4   0  -2  429.56  160.28
  -4   0   2  482.45  159.48
  -4   0   2  439.16  160.28
  -4   0   2  387.16  160.18
   3   0  -2   79.09   29.10
   3   0  -2  127.99   31.70
   3   0  -2   59.69   27.50
  -3   0   2  123.79   31.70
  -3   0   2   83.59   29.30
  -3   0   2   69.99   27.40
   2   0  -2 3771.72 1279.07
   2   0  -2 3279.57 1278.97
  -2   0   2 3258.17 1278.97
  -2   0   2 3623.84 1278.97
  -2   0   2 3373.26 1278.67
  -1   0   2 3050.09 1210.48
  -1   0   2 3511.45 1210.68
  -2   0  -2 3459.25 1246.98
   2   0   2 3439.76 1246.68
   2   0   2 3401.36 1246.98
   2   0   2 3205.08 1246.68
  -3   0  -2   89.79   29.50
  -3   0  -2   74.99   30.70
   3   0   2   62.69   27.90
   3   0   2   94.29   29.40
   3   0   2   78.89   27.90
  -4   0  -2  365.96  150.78
  -4   0  -2  437.16  151.08
   4   0   2  410.76  150.18
   4   0   2  403.86  151.08
  -5   0  -2  209.78   74.89
  -5   0  -2  194.58   74.79
   5   0   2  206.48   74.49
   5   0   2  228.68   73.59
   5   0   2  161.98   73.49
  -6   0  -2    6.90   11.00
  -6   0  -2   19.00   14.80
   6   0   2   11.90    6.10
  -7   0  -2   36.30   22.40
  -7   0  -2   44.70   25.50
  -7   0  -2   58.59   19.70
   7   0   2   51.39   20.10
  -8   0  -2   64.49   32.50
  -8   0  -2   80.59   29.10
  -9   0  -2  120.99   47.80
  -9   0  -2  166.98   53.29
 -10   0  -2   31.60   21.50
 -10   0  -2   48.30   17.50
 -11   0  -2   10.50    7.20
 -11   0  -2   17.10   14.90
 -12   0  -2   63.69   23.20
 -12   0  -2   43.50   29.00
 -13   0  -2   11.80    6.90
 -13   0  -2  -13.60   11.10
 -14   0  -2    6.60    7.40
 -14   0  -2   10.50   16.40
 -15   0  -2   26.50   11.30
 -15   0  -2    1.80   19.80
 -16   0  -2   57.99   17.70
 -16   0  -2   10.60   21.80
 -17   0  -2  130.79   45.00
 -17   0  -2   84.49   50.39
  17  -1  -2   12.00   15.50
 -17   1   2   28.20   11.90
 -16   1   2  -19.40   14.70
 -16   1   2   18.90    8.90
 -15   1   2  -10.30   17.90
 -15   1   2   -4.10    7.70
 -14   1   2   -3.20    7.00
 -14   1   2   19.70   16.30
 -13   1   2   -8.10    5.90
 -13   1   2  -19.10   11.90
 -12   1   2    2.20    5.70
 -11   1   2    6.80    5.50
 -11   1   2  -11.10   11.00
 -10   1   2    7.70   12.10
 -10   1   2    2.10    4.60
  -9   1   2   -5.30    8.60
  -9   1   2    4.40    4.00
   8  -1  -2    5.70   14.40
  -8   1   2    1.60    8.80
  -8   1   2    7.70    4.40
   7  -1  -2   -0.90   14.50
  -7   1   2    0.10    3.10
  -7   1   2    6.00    8.30
   6  -1  -2    4.40   12.10
   6  -1  -2    1.00    6.70
  -6   1   2    6.50    3.70
  -6   1   2   -0.10    7.10
  -6   1   2   12.10   15.00
   5  -1  -2   -1.00    5.80
   5  -1  -2    4.60   13.50
   5  -1  -2   -3.10    2.50
  -5   1   2    0.00    6.50
  -5   1   2   17.70   15.60
  -5   1   2   -3.50    2.50
   4  -1  -2   -4.80    5.80
   4  -1  -2   -4.90    2.20
   4  -1  -2    4.20   12.90
  -4   1   2    2.90    2.60
  -4   1   2  -12.00   13.70
  -4   1   2    2.10    6.40
   3  -1  -2    0.00    2.70
   3  -1  -2    3.00    5.40
   3  -1  -2   -7.60   11.20
  -3   1   2    6.70    5.60
  -3   1   2   -3.20    2.60
  -3   1   2  -12.00   13.60
   2  -1  -2    2.40    4.20
   2  -1  -2    2.60    2.60
   2  -1  -2   -1.50   11.20
  -2   1   2   -0.90   11.80
  -2   1   2    2.60    4.10
  -2   1   2    3.90    2.80
   1  -1  -2    1.50    2.30
   1  -1  -2    0.10    2.60
   1  -1  -2    6.80    7.80
  -1   1   2   -5.00    8.10
  -1   1   2    0.90    2.00
  -1   1   2    0.20    2.50
   0  -1  -2    1.90    2.00
   0   1   2   -1.70    4.30
  -1  -1  -2   -0.80    1.70
  -1  -1  -2    4.00    3.70
  -1  -1  -2    4.70    4.60
  -1  -1  -2    3.90    2.70
   1   1   2    2.80    3.30
   1   1   2   -0.10    2.90
   1   1   2    0.60    1.60
   1   1   2    0.40    4.50
  -2  -1  -2    2.80    5.70
  -2  -1  -2   -6.60    2.10
  -2  -1  -2   -0.70    3.00
   2   1   2    5.60    5.30
   2   1   2    0.90    3.40
   2   1   2   -2.50    2.00
  -3  -1  -2    2.90    6.90
  -3  -1  -2    3.80    8.90
  -3  -1  -2   11.20    3.00
  -3  -1  -2   -0.90    3.30
   3   1   2   -0.90    2.90
   3   1   2   -0.40    6.00
   3   1   2    2.00    4.10
  -4  -1  -2   -0.50    6.90
  -4  -1  -2    4.80    9.50
  -4  -1  -2    3.90    2.70
   4   1   2   -0.90    2.30
   4   1   2   -5.40    3.50
   4   1   2    2.10    6.50
  -5  -1  -2    6.80    3.30
  -5  -1  -2  -11.00    9.80
  -5  -1  -2   -2.20    6.80
   5   1   2    5.00    7.00
   5   1   2   -5.80    6.50
   5   1   2    3.90    2.80
  -6  -1  -2    6.10    3.60
  -6  -1  -2   -6.60   11.20
  -6  -1  -2   -2.50    7.10
   6   1   2    5.60    4.10
  -7  -1  -2    0.00    3.40
  -7  -1  -2   -7.20    6.10
  -7  -1  -2    6.60   16.00
  -8  -1  -2   18.90   12.70
  -8  -1  -2   -2.00    3.60
  -8  -1  -2   -8.60    8.10
  -9  -1  -2    6.60   10.40
  -9  -1  -2    7.20    5.10
 -10  -1  -2    0.90   11.60
 -10  -1  -2    5.10    5.30
 -11  -1  -2   -3.20   10.70
 -11  -1  -2    0.30    5.40
 -12  -1  -2   22.20   15.60
 -12  -1  -2   -1.90    6.00
 -13  -1  -2  -20.20   12.80
 -13  -1  -2   -4.80    5.90
 -14  -1  -2   18.40   17.90
 -14  -1  -2   -2.20    5.70
 -15  -1  -2   18.60   10.00
 -15  -1  -2   13.90   20.40
 -16  -1  -2   30.40   12.60
 -16  -1  -2   17.10   19.70
 -17  -1  -2   51.29   20.00
 -17  -1  -2   46.10   31.10
  17  -2  -2   31.10   18.90
 -17   2   2   45.30   16.10
 -17   2   2    8.40   21.40
  16  -2  -2   23.90   15.80
 -16   2   2   39.80   23.30
 -16   2   2   16.40   12.60
  15  -2  -2   32.30   13.10
 -15   2   2    3.40    9.90
 -15   2   2   10.00   19.00
 -14   2   2   28.00   12.50
 -14   2   2   20.20   18.90
 -13   2   2   -3.40   15.70
 -13   2   2    8.10    7.20
 -12   2   2   48.50   28.50
 -12   2   2   62.39   23.30
 -11   2   2  116.99   50.29
 -11   2   2  122.49   45.70
 -10   2   2   78.19   33.70
 -10   2   2   76.39   29.50
  -9   2   2  121.69   57.29
  -9   2   2  155.28   54.59
   8  -2  -2   30.10   20.90
  -8   2   2   29.50   15.50
  -8   2   2   29.00   12.10
   7  -2  -2   67.89   26.90
  -7   2   2   48.80   20.60
  -7   2   2   39.00   17.40
   6  -2  -2  244.48   88.19
   6  -2  -2  242.68   89.29
  -6   2   2  250.77   88.49
  -6   2   2  215.68   87.39
   5  -2  -2  504.45  175.78
   5  -2  -2  497.45  176.28
   5  -2  -2  433.26  174.88
  -5   2   2  534.75  176.38
  -5   2   2  406.86  174.88
  -5   2   2  501.85  175.58
   4  -2  -2  242.88   87.39
   4  -2  -2  234.58   87.79
   4  -2  -2  204.58   87.39
   4  -2  -2  258.07   89.09
  -4   2   2  230.08   87.39
  -4   2   2  242.28   87.89
  -4   2   2  253.97   89.09
   3  -2  -2   14.10    6.30
   3  -2  -2   20.60   14.40
   3  -2  -2    5.90    5.80
  -3   2   2    5.90   15.40
  -3   2   2    5.50    6.20
  -3   2   2    7.70    5.30
   2  -2  -2 1488.65  566.04
   2  -2  -2 1511.25  566.54
   2  -2  -2 1557.24  566.14
  -2   2   2 1608.44  566.14
  -2   2   2 1463.95  566.04
  -2   2   2 1573.34  566.64
   1  -2  -2  877.71  311.67
   1  -2  -2  820.22  311.27
  -1   2   2  800.42  311.27
  -1   2   2  871.11  311.57
   0  -2  -2  318.97  123.09
   0  -2  -2  328.27  123.29
   0  -2  -2  356.36  123.59
   0   2   2  307.27  123.29
   0   2   2  328.87  123.09
   0   2   2  363.96  123.59
  -1  -2  -2  824.42  300.07
  -1  -2  -2  757.82  299.87
  -1  -2  -2  829.52  299.97
  -1  -2  -2  799.82  300.07
   1   2   2  813.82  300.07
   1   2   2  894.51  299.97
   1   2   2  770.52  299.87
   1   2   2  795.12  300.07
  -2  -2  -2 1489.95  578.04
  -2  -2  -2 1599.24  578.34
  -2  -2  -2 1579.04  577.94
   2   2   2 1557.04  578.04
   2   2   2 1697.03  577.94
   2   2   2 1457.25  578.24
  -3  -2  -2   14.40    6.60
  -3  -2  -2   13.70    5.70
  -3  -2  -2   12.10    9.20
   3   2   2   -2.40    7.60
   3   2   2   13.10    5.30
   3   2   2   18.40    7.10
  -4  -2  -2  226.98   90.39
  -4  -2  -2  248.58   90.29
  -4  -2  -2  267.67   90.49
  -4  -2  -2  237.68   91.39
   4   2   2  220.18   91.09
  -5  -2  -2  547.75  190.38
  -5  -2  -2  494.15  190.18
  -5  -2  -2  500.95  191.18
   5   2   2  503.65  190.28
  -6  -2  -2  233.58   86.99
  -6  -2  -2  218.48   86.29
  -6  -2  -2  253.27   88.09
   6   2   2  239.48   86.69
  -7  -2  -2   41.60   16.30
  -7  -2  -2   40.70   19.90
  -7  -2  -2   43.40   20.50
  -8  -2  -2   33.50   14.80
  -8  -2  -2   36.50   19.70
  -8  -2  -2   79.09   30.10
  -9  -2  -2  184.68   53.09
  -9  -2  -2  125.09   47.30
  -9  -2  -2  105.69   50.39
 -10  -2  -2  100.79   40.20
 -10  -2  -2   84.69   35.50
 -10  -2  -2   72.49   30.10
 -11  -2  -2  115.89   42.50
 -11  -2  -2   99.59   47.70
 -12  -2  -2   77.29   24.60
 -12  -2  -2   27.10   29.10
 -13  -2  -2    5.30    6.00
 -13  -2  -2    6.20   15.60
 -14  -2  -2   23.60   11.40
 -14  -2  -2   31.30   22.20
 -15  -2  -2    6.90   17.70
 -15  -2  -2   16.70    8.50
 -16  -2  -2   42.10   28.60
 -16  -2  -2   41.90   17.50
 -17  -2  -2   51.39   18.70
 -17  -2  -2   23.20   27.80
  17  -3  -2    9.10   13.30
 -17   3   2  -13.60   16.10
 -17   3   2    1.20    9.60
  16  -3  -2   33.20   13.50
 -16   3   2   17.00   16.50
 -16   3   2  -16.30    9.60
  15  -3  -2   10.40   10.70
 -15   3   2   -5.70    9.10
 -15   3   2   15.60   15.70
  14  -3  -2    0.40    9.50
 -14   3   2   10.10   13.60
 -14   3   2  -20.20    6.20
  13  -3  -2    7.20    9.60
 -13   3   2  -11.60   14.20
 -13   3   2    6.20    6.90
  12  -3  -2   15.80    8.30
 -12   3   2    2.00    7.00
 -12   3   2    5.00   15.20
  11  -3  -2    3.80    7.60
 -11   3   2   -0.70   12.30
 -11   3   2   -0.30    5.40
  10  -3  -2   -1.40    5.90
 -10   3   2    3.80    5.50
 -10   3   2   -1.30   10.80
   9  -3  -2    0.60    6.00
  -9   3   2    0.20    9.10
  -9   3   2   -6.90    3.90
   8  -3  -2  -19.60   13.50
   8  -3  -2   -1.00    5.10
  -8   3   2   -4.50    7.70
  -8   3   2   -2.80    3.90
   7  -3  -2    9.40   16.80
  -7   3   2   -4.70    3.50
  -7   3   2    5.20    8.40
   6  -3  -2    2.40    4.90
   6  -3  -2   15.40   16.60
  -6   3   2    6.70    7.10
  -6   3   2    0.60    4.30
   5  -3  -2   -5.20   13.60
   5  -3  -2    1.40    4.80
  -5   3   2    2.40    6.60
  -5   3   2   -4.60    3.80
   4  -3  -2   -4.70   12.80
   4  -3  -2    2.40    4.90
  -4   3   2   -4.20    5.00
  -4   3   2  -11.30    3.70
  -4   3   2   -4.10   14.70
   3  -3  -2    0.10   13.40
   3  -3  -2   -1.60    5.10
  -3   3   2   -0.70    4.30
  -3   3   2    8.30   15.40
  -3   3   2   -6.80    4.20
  -3   3   2    2.40    4.50
   2  -3  -2    5.00    5.60
   2  -3  -2   -8.70   12.70
  -2   3   2   -0.80    4.90
  -2   3   2    6.80   14.00
   1  -3  -2   -9.80   11.90
   1  -3  -2    0.90    5.20
  -1   3   2    8.90   13.70
  -1   3   2    1.10    5.20
   0  -3  -2   -4.40    3.60
   0  -3  -2   -7.00   11.40
   0  -3  -2    1.30    5.50
   0   3   2    0.20    3.70
   0   3   2    3.00    5.00
   0   3   2    1.50   11.10
  -1  -3  -2   -2.50    4.80
  -1  -3  -2    7.70    5.70
  -1  -3  -2    3.60    9.60
   1   3   2    4.50    5.30
   1   3   2    1.60    5.20
   1   3   2   -1.90    2.80
   1   3   2    0.10    9.90
  -2  -3  -2    0.00    5.80
  -2  -3  -2    2.10    3.70
  -2  -3  -2   -5.40    6.30
  -2  -3  -2    7.10    5.40
   2   3   2   -6.80    5.70
   2   3   2   -4.60    5.50
   2   3   2    0.70    3.20
   2   3   2    1.80    5.10
  -3  -3  -2    6.10    7.80
  -3  -3  -2  -11.30    4.20
  -3  -3  -2   -4.90    3.50
   3   3   2    4.30    3.00
   3   3   2    3.10    6.50
   3   3   2    7.10    5.90
  -4  -3  -2    0.40    4.30
  -4  -3  -2   -0.60    7.10
  -4  -3  -2   -5.20    3.30
   4   3   2    1.70    3.30
   4   3   2    0.50    5.10
   4   3   2   -1.80    6.90
  -5  -3  -2   -6.60    3.10
  -5  -3  -2    0.50    4.30
  -5  -3  -2    0.20    7.20
   5   3   2    4.30    5.10
  -6  -3  -2  -10.10    2.60
  -6  -3  -2   -0.10    7.70
  -6  -3  -2   -0.20    3.60
  -7  -3  -2   -7.10    2.50
  -7  -3  -2    3.00    8.80
  -7  -3  -2    0.60    8.60
  -8  -3  -2    4.60   11.10
  -8  -3  -2   -3.80    3.00
  -8  -3  -2    5.80   10.30
  -9  -3  -2    4.10   11.50
  -9  -3  -2   -5.80    3.30
  -9  -3  -2    8.60   10.40
 -10  -3  -2    0.90   11.60
 -10  -3  -2   -3.40    3.70
 -11  -3  -2   12.70   16.40
 -11  -3  -2    4.90   15.60
 -11  -3  -2   -1.70    4.60
 -12  -3  -2   -9.80   13.00
 -12  -3  -2   10.10    5.40
 -13  -3  -2   -6.00   13.20
 -13  -3  -2    2.20    4.80
 -14  -3  -2    1.50   15.10
 -14  -3  -2    7.90    5.80
 -15  -3  -2   -5.60   16.40
 -15  -3  -2   13.30    7.10
 -16  -3  -2   -1.80   16.60
 -16  -3  -2   14.30    7.70
 -17  -3  -2   53.39   17.10
 -17  -3  -2    1.50   24.10
  16  -4  -2   59.49   22.50
 -16   4   2   28.30   22.20
 -16   4   2   29.60   17.70
  15  -4  -2   72.79   24.80
 -15   4   2   37.40   25.50
 -15   4   2   40.10   20.20
  14  -4  -2   35.30   15.60
 -14   4   2   62.39   22.50
 -14   4   2   12.20   12.40
  13  -4  -2   42.00   20.80
 -13   4   2   75.89   27.60
 -13   4   2   36.90   18.90
  12  -4  -2   43.90   16.80
 -12   4   2   37.90   21.00
 -12   4   2   25.60   14.20
  11  -4  -2  157.08   48.30
 -11   4   2  132.89   50.79
 -11   4   2   84.39   47.50
  10  -4  -2  218.48   89.09
 -10   4   2  254.07   88.89
 -10   4   2  243.68   90.69
   9  -4  -2   14.20    9.10
  -9   4   2   15.00   12.10
  -9   4   2   11.40    8.00
   8  -4  -2   -2.50    5.80
  -8   4   2   -2.90    4.60
  -8   4   2    7.20    8.30
   7  -4  -2   70.89   30.70
   7  -4  -2   42.20   23.10
  -7   4   2   64.59   23.00
  -7   4   2   65.19   24.60
   6  -4  -2  139.69   50.99
  -6   4   2  135.89   51.39
  -6   4   2  129.59   50.89
   5  -4  -2  344.07  114.79
   5  -4  -2  300.77  112.89
  -5   4   2  309.77  112.99
  -5   4   2  271.77  112.79
   4  -4  -2  466.45  173.98
   4  -4  -2  439.16  172.78
  -4   4   2  468.05  172.78
  -4   4   2  506.35  172.78
  -4   4   2  453.75  172.68
   3  -4  -2   53.89   28.40
   3  -4  -2   67.99   24.30
  -3   4   2   54.79   29.90
  -3   4   2   51.69   23.10
  -3   4   2   90.79   24.50
   2  -4  -2  603.74  241.48
   2  -4  -2  709.63  240.88
  -2   4   2  567.14  241.48
  -2   4   2  720.73  240.88
   1  -4  -2  336.67  112.59
   1  -4  -2  304.17  111.49
  -1   4   2  300.37  111.59
  -1   4   2  263.17  112.29
   0  -4  -2   96.49   31.20
   0  -4  -2   76.69   33.10
   0  -4  -2   74.29   30.20
   0   4   2   74.19   30.20
   0   4   2   94.09   33.70
   0   4   2   79.49   30.80
  -1  -4  -2  307.47  114.99
  -1  -4  -2  331.17  114.99
  -1  -4  -2  336.37  115.19
   1   4   2  273.87  114.59
   1   4   2  307.97  114.99
   1   4   2  306.57  114.99
   1   4   2  311.77  115.19
  -2  -4  -2  711.73  260.87
  -2  -4  -2  717.13  260.67
   2   4   2  706.53  260.87
   2   4   2  644.34  260.27
   2   4   2  763.72  260.47
   2   4   2  672.43  260.67
  -3  -4  -2   48.40   22.20
  -3  -4  -2   46.20   22.90
  -3  -4  -2   63.19   24.30
   3   4   2   62.19   24.10
   3   4   2   93.09   23.80
   3   4   2   56.09   22.10
  -4  -4  -2  463.35  170.98
  -4  -4  -2  444.06  170.08
  -4  -4  -2  473.05  170.28
  -5  -4  -2  343.77  121.89
  -5  -4  -2  312.47  120.49
  -5  -4  -2  327.07  120.69
  -6  -4  -2  159.48   55.09
  -6  -4  -2  188.08   58.89
  -6  -4  -2  126.99   54.79
  -7  -4  -2   64.59   25.70
  -7  -4  -2   64.39   25.20
  -7  -4  -2   69.49   29.50
  -8  -4  -2   17.10   12.70
  -8  -4  -2    0.60    4.50
  -9  -4  -2   15.70   15.10
  -9  -4  -2   19.80    8.90
 -10  -4  -2  256.47   81.09
 -10  -4  -2  193.08   77.49
 -11  -4  -2  114.89   45.80
 -11  -4  -2  142.99   53.09
 -12  -4  -2   24.10   22.00
 -12  -4  -2   43.30   16.10
 -13  -4  -2   52.99   28.70
 -13  -4  -2   46.00   19.40
 -14  -4  -2   56.79   25.00
 -14  -4  -2   25.50   13.10
 -15  -4  -2   77.39   31.50
 -15  -4  -2   89.79   40.80
 -16  -4  -2   39.80   17.80
 -16  -4  -2   40.20   29.10
  16  -5  -2   31.90   15.70
 -16   5   2   18.60   18.00
 -16   5   2   -2.90   10.70
  15  -5  -2   10.10   13.10
 -15   5   2   -1.50    9.10
 -15   5   2    5.30   14.00
  14  -5  -2   -0.90   10.30
 -14   5   2   10.10   17.60
 -14   5   2    7.20    8.90
  13  -5  -2   21.50   10.30
 -13   5   2  -17.90   12.10
 -13   5   2    9.60    8.00
  12  -5  -2  -16.10    7.50
 -12   5   2   -3.90    6.20
 -12   5   2   12.70   14.60
  11  -5  -2    2.80    8.50
 -11   5   2  -10.90   11.80
 -11   5   2   -4.40    6.50
  10  -5  -2    6.60    8.60
 -10   5   2    6.30   10.30
 -10   5   2   -1.10    5.40
   9  -5  -2   -5.50    6.80
  -9   5   2    9.30   10.30
  -9   5   2    2.00    6.20
   8  -5  -2    5.20    7.30
  -8   5   2   -9.80    4.80
   7  -5  -2  -32.70   12.70
  -7   5   2    2.00    5.50
  -7   5   2    3.80    7.20
   6  -5  -2   -6.20    5.50
   6  -5  -2   -6.20   16.70
  -6   5   2    1.80    5.90
  -6   5   2   -9.40    4.40
   5  -5  -2    3.80   16.70
   5  -5  -2   -0.90    5.60
  -5   5   2   -4.00    5.00
  -5   5   2   -0.70    5.30
   4  -5  -2   10.20   15.30
   4  -5  -2    9.10    6.60
  -4   5   2    2.20    4.30
  -4   5   2    0.70    5.20
  -4   5   2   -0.70    5.50
   3  -5  -2    5.80    6.30
   3  -5  -2   -7.70   13.10
  -3   5   2    6.70    5.70
   2  -5  -2    0.00    6.20
   2  -5  -2    5.20   14.80
  -2   5   2   -9.20   15.50
  -2   5   2    0.90    5.80
   1  -5  -2    5.20   12.80
   1  -5  -2    4.00    6.50
  -1   5   2    4.70   13.80
  -1   5   2    5.70    5.70
   0  -5  -2   10.10   13.10
   0  -5  -2   -6.00    6.10
   0  -5  -2   -0.30    4.70
   0   5   2   -6.10   12.30
   0   5   2    6.70    5.70
   0   5   2    3.10    4.90
  -1  -5  -2   -1.40    5.20
  -1  -5  -2   -8.20   11.50
  -1  -5  -2   -1.20    6.00
   1   5   2    4.20   12.10
   1   5   2   -8.30    4.70
   1   5   2    1.20    5.70
   1   5   2    0.20    3.10
  -2  -5  -2  -12.90    5.70
  -2  -5  -2    4.30    6.20
   2   5   2    1.90    6.00
   2   5   2   -5.20   10.70
  -3  -5  -2    5.30    7.50
  -3  -5  -2   -9.10    4.80
  -3  -5  -2    0.10    4.10
   3   5   2   -0.60    7.90
   3   5   2   -7.70    5.20
  -4  -5  -2   -3.70    8.80
  -4  -5  -2   -5.00    4.20
  -4  -5  -2    0.40    5.30
  -5  -5  -2   -2.80    4.90
  -5  -5  -2   -2.30    4.00
  -5  -5  -2   -3.90    7.40
  -6  -5  -2    1.50    5.00
  -6  -5  -2    4.40    9.00
  -6  -5  -2   -1.70    4.00
  -7  -5  -2    1.20    4.60
  -7  -5  -2   -1.00    4.10
  -7  -5  -2    8.50   11.70
  -8  -5  -2   -2.80    4.20
  -8  -5  -2   -0.60    4.60
  -8  -5  -2    5.00   10.40
  -9  -5  -2    0.20    5.40
  -9  -5  -2   18.00   12.40
 -10  -5  -2   -8.40   10.60
 -10  -5  -2   -6.50    4.60
 -11  -5  -2    1.30   12.60
 -11  -5  -2   -4.30    4.90
 -12  -5  -2   -8.90   12.70
 -12  -5  -2    6.20    5.80
 -13  -5  -2   -5.70    4.70
 -13  -5  -2    8.90   17.10
 -14  -5  -2   -9.30   14.00
 -14  -5  -2    6.00    6.50
 -15  -5  -2   -7.20   15.80
 -15  -5  -2   -3.90    5.70
 -16  -5  -2   17.30   21.00
 -16  -5  -2   14.00    9.60
  16  -6  -2   76.29   27.30
 -16   6   2   37.70   22.00
 -16   6   2   48.30   26.60
  15  -6  -2   32.80   16.90
 -15   6   2   28.30   15.60
 -15   6   2   19.20   18.90
  14  -6  -2   36.70   21.00
 -14   6   2    8.30   13.20
 -14   6   2   54.59   20.70
  13  -6  -2    6.40   11.80
 -13   6   2   21.10   11.90
 -13   6   2   48.60   19.70
  12  -6  -2   10.20   12.70
 -12   6   2   31.50   15.70
 -12   6   2    9.40    9.50
  11  -6  -2   17.50   14.40
 -11   6   2   24.10   17.00
 -11   6   2   46.10   14.40
  10  -6  -2   88.69   39.80
 -10   6   2  131.29   42.60
 -10   6   2   93.09   39.00
   9  -6  -2  183.48   80.49
  -9   6   2  215.08   80.39
  -9   6   2  253.47   81.59
   8  -6  -2   20.90   11.80
  -8   6   2   17.70   10.50
  -8   6   2   21.30   12.20
   7  -6  -2   49.10   24.20
  -7   6   2   53.69   23.70
  -7   6   2   73.29   24.90
   6  -6  -2   95.59   44.70
   6  -6  -2  185.28   53.49
  -6   6   2  111.19   44.30
  -6   6   2  115.89   44.00
   5  -6  -2   19.20   20.00
   5  -6  -2   10.50    9.00
  -5   6   2   19.10    7.80
  -5   6   2    5.20    8.00
   4  -6  -2  270.57  101.59
   4  -6  -2  274.67  103.59
   3  -6  -2  270.67  104.29
   3  -6  -2  291.27  105.99
   2  -6  -2  167.48   66.09
   2  -6  -2  174.88   64.89
   1  -6  -2  136.69   53.39
   1  -6  -2  141.29   54.69
  -1   6   2  186.48   59.99
  -1   6   2  146.99   53.59
   0  -6  -2  165.18   62.99
   0  -6  -2  172.78   63.59
   0  -6  -2  175.08   64.79
   0   6   2  168.58   63.09
   0   6   2  165.78   64.49
  -1  -6  -2  157.28   53.39
  -1  -6  -2  146.19   53.19
   1   6   2  133.79   53.19
   1   6   2  129.19   54.29
  -2  -6  -2  178.28   65.89
  -2  -6  -2  159.88   65.59
   2   6   2  188.88   65.69
   2   6   2  164.78   65.69
  -3  -6  -2  282.67  108.29
  -3  -6  -2  294.67  107.79
   3   6   2  289.67  107.69
  -4  -6  -2  202.08   85.79
  -4  -6  -2  267.37   87.19
  -4  -6  -2  238.28   86.19
  -5  -6  -2   35.60   10.70
  -5  -6  -2   14.40   10.80
  -5  -6  -2   18.20   14.90
  -6  -6  -2  117.89   44.20
  -6  -6  -2  124.59   48.00
  -6  -6  -2  110.59   44.20
  -7  -6  -2   58.39   26.20
  -7  -6  -2   81.79   31.30
  -7  -6  -2   71.39   26.90
  -8  -6  -2    9.00   15.80
  -8  -6  -2   31.80   11.80
  -8  -6  -2   22.80   11.30
  -9  -6  -2  281.57   84.19
  -9  -6  -2  191.98   77.29
 -10  -6  -2  115.79   48.20
 -10  -6  -2  165.18   55.69
 -11  -6  -2   34.80   16.50
 -11  -6  -2   65.19   26.40
 -12  -6  -2   29.00   13.40
 -12  -6  -2   32.30   21.50
 -13  -6  -2   11.60   17.80
 -13  -6  -2   19.80    9.80
 -14  -6  -2   12.50   18.90
 -14  -6  -2   20.60   10.20
 -15  -6  -2   19.00   12.10
 -15  -6  -2   46.50   26.10
 -16  -6  -2   80.39   25.20
 -16  -6  -2   19.10   31.30
  15  -7  -2    7.30   13.30
 -15   7   2  -13.00   10.00
 -15   7   2   23.80   14.50
  14  -7  -2    7.50   11.30
 -14   7   2   -7.10   12.30
 -14   7   2   -7.60    9.10
  13  -7  -2   -5.80    9.40
 -13   7   2   -6.40    6.90
 -13   7   2    1.30   13.50
  12  -7  -2    0.80    8.70
 -12   7   2   -9.80    6.80
 -12   7   2   16.70   12.10
  11  -7  -2   14.30   10.40
 -11   7   2   -3.80    6.40
 -11   7   2   13.40   12.20
  10  -7  -2   -1.60    8.10
 -10   7   2    5.40    8.50
 -10   7   2   21.80   12.10
   9  -7  -2   -6.90    7.70
  -9   7   2    4.60    9.10
  -9   7   2   -3.80   13.50
   8  -7  -2   -0.50    8.50
  -8   7   2    3.20    8.10
  -8   7   2    4.50    7.20
   7  -7  -2   -4.70    6.90
  -7   7   2    2.70    6.20
  -7   7   2    2.50    6.80
   6  -7  -2   -9.40    5.70
  -6   7   2   -8.90    5.20
   5  -7  -2   -3.70    6.10
  -5   7   2   -5.70    5.40
   4  -7  -2  -16.30    5.80
   3  -7  -2   -3.10    6.50
   2  -7  -2    1.20    7.10
   1  -7  -2    0.60    6.70
   1  -7  -2   -4.60    3.30
  -1   7   2   -1.50    3.90
   0  -7  -2   -7.20    5.80
   0  -7  -2   -0.90    4.70
   0   7   2   -8.80    4.30
  -1  -7  -2    4.20    6.80
  -1  -7  -2    3.80    6.40
   1   7   2   -3.30    6.20
   1   7   2   -5.10   13.20
  -2  -7  -2   -6.10    6.00
  -2  -7  -2   10.40    7.20
   2   7   2   -5.20    5.20
   2   7   2   20.40   13.50
  -3  -7  -2  -13.80    6.60
  -3  -7  -2    6.40    6.20
   3   7   2    6.40   10.40
  -4  -7  -2    0.50    7.90
  -4  -7  -2    1.40    6.10
  -5  -7  -2    5.90    6.70
  -5  -7  -2   -6.50    8.70
  -6  -7  -2   -4.90    5.90
  -6  -7  -2   -4.10    9.10
  -6  -7  -2    5.10    5.50
  -7  -7  -2   -7.50    5.30
  -7  -7  -2    9.80   11.70
  -7  -7  -2    0.50    5.20
  -8  -7  -2    9.10   13.00
  -8  -7  -2    0.60    5.30
  -8  -7  -2  -15.50    4.20
  -9  -7  -2    5.40    6.80
  -9  -7  -2   11.00   13.60
  -9  -7  -2    5.60   10.30
 -10  -7  -2   -3.00    5.50
 -10  -7  -2    9.50   14.80
 -11  -7  -2   -3.90    5.50
 -11  -7  -2    5.70   15.00
 -12  -7  -2    3.70    6.20
 -12  -7  -2   -5.00   14.50
 -13  -7  -2  -13.30    5.40
 -13  -7  -2   14.90   17.70
 -14  -7  -2    6.50   18.00
 -14  -7  -2   14.30    8.80
 -15  -7  -2   -3.80   18.00
  15  -8  -2   12.00   16.70
 -15   8   2   13.30   13.00
 -15   8   2   46.50   18.50
  14  -8  -2   22.60   14.90
 -14   8   2   18.80   12.60
 -14   8   2   22.70   17.30
 -13   8   2   16.40   14.50
 -13   8   2    3.60    8.40
  12  -8  -2   34.40   13.30
 -12   8   2    3.00    8.40
 -12   8   2   11.00   10.70
  11  -8  -2  104.99   41.50
 -11   8   2  110.49   41.80
 -11   8   2   89.69   40.00
  10  -8  -2   31.90   15.50
 -10   8   2   19.30   14.90
 -10   8   2   30.80   13.70
   9  -8  -2    8.20   10.80
  -9   8   2    6.60   10.20
  -9   8   2   32.00   12.20
   8  -8  -2  247.98   92.69
  -8   8   2  239.68   92.29
  -8   8   2  257.37   92.59
   7  -8  -2   70.89   26.90
  -7   8   2   55.59   25.20
   6  -8  -2   75.79   27.00
  -6   8   2   54.59   25.30
   5  -8  -2  141.99   42.10
  -5   8   2   83.69   40.10
   4  -8  -2   25.40   13.90
   3  -8  -2  175.48   66.39
   2  -8  -2   24.20   13.30
   1  -8  -2   22.10    9.20
   1  -8  -2    5.20    4.90
  -1   8   2    7.90    6.30
   0  -8  -2   -1.40    6.30
   0  -8  -2   17.20    9.20
   0   8   2   19.30    7.60
  -1  -8  -2    9.80    7.70
  -1  -8  -2    2.30    7.60
   1   8   2    3.60    6.10
  -2  -8  -2   14.20   11.60
  -2  -8  -2   19.50   11.70
   2   8   2   31.80   15.20
  -3  -8  -2  211.18   68.89
  -3  -8  -2  161.98   68.09
   3   8   2  175.88   68.39
  -4  -8  -2   39.60   18.20
  -4  -8  -2   33.50   16.20
   4   8   2   33.20   16.70
  -5  -8  -2  149.19   55.29
  -5  -8  -2  136.09   56.69
  -6  -8  -2   54.79   21.90
  -6  -8  -2   44.70   24.60
  -7  -8  -2   71.89   30.30
  -7  -8  -2   85.39   34.50
  -7  -8  -2   77.29   31.00
  -8  -8  -2  274.27   98.69
  -8  -8  -2  244.48   96.19
  -8  -8  -2  264.07   96.99
  -9  -8  -2   21.90   10.30
  -9  -8  -2   13.10    9.00
  -9  -8  -2    8.10   16.10
 -10  -8  -2   56.29   29.60
 -11  -8  -2   63.79   29.50
 -11  -8  -2  113.89   38.70
 -12  -8  -2   10.30   18.10
 -12  -8  -2   18.10    9.90
 -13  -8  -2   13.00   10.40
 -13  -8  -2   33.50   23.10
 -14  -8  -2   67.69   43.40
 -15  -8  -2   41.20   16.30
 -15  -8  -2   21.40   24.40
  14  -9  -2    5.50   14.70
 -14   9   2    2.40    9.40
 -14   9   2   44.50   16.60
  13  -9  -2   10.30   13.60
 -13   9   2  -11.80   11.80
 -13   9   2  -14.70    7.30
 -12   9   2   20.60   12.40
 -12   9   2    4.20    9.70
  11  -9  -2   18.40   12.80
 -11   9   2   -2.90    8.00
 -11   9   2   21.20   10.80
  10  -9  -2  -13.40    9.70
 -10   9   2   -2.90    8.00
 -10   9   2   21.00    9.30
   9  -9  -2   -0.10    9.10
  -9   9   2    4.00    7.70
   8  -9  -2   18.40   11.60
  -8   9   2   12.00   10.00
   7  -9  -2   -5.40    9.50
  -7   9   2  -11.40    6.60
   6  -9  -2  -18.80    6.90
  -6   9   2   -1.20    6.80
   5  -9  -2   -1.90    7.00
  -5   9   2    2.80    7.00
   4  -9  -2    0.20    8.60
   3  -9  -2    5.10    9.00
   2  -9  -2   11.30   10.20
   1  -9  -2    4.80    4.50
   1  -9  -2   -0.20    8.10
  -1   9   2   -0.90    4.80
   0  -9  -2   14.90    8.10
   0  -9  -2    5.80   10.10
   0   9   2   10.50    8.00
  -1  -9  -2   -2.50    5.90
  -1  -9  -2  -11.30    6.80
   1   9   2    1.10    5.80
  -2  -9  -2    5.20    8.20
  -3  -9  -2    5.00    8.90
  -3  -9  -2   -7.60    6.90
   3   9   2   17.10   14.90
  -4  -9  -2   -1.70    8.50
  -4  -9  -2   -3.70    7.30
   4   9   2    9.80   11.20
  -5  -9  -2   -5.00   10.00
  -5  -9  -2    1.90    7.10
  -6  -9  -2    9.30    8.20
  -6  -9  -2    4.80   11.20
  -7  -9  -2   -5.80    7.10
  -7  -9  -2   -7.20   11.20
  -8  -9  -2  -14.20   10.80
  -8  -9  -2   -0.40    7.00
  -9  -9  -2   10.40    7.80
  -9  -9  -2   -9.50   14.30
  -9  -9  -2   -7.30    6.10
 -10  -9  -2    2.30    6.60
 -10  -9  -2   -3.00   15.10
 -10  -9  -2   -1.20    6.20
 -11  -9  -2  -15.00   13.00
 -11  -9  -2   -3.50    6.50
 -12  -9  -2   14.30   15.90
 -12  -9  -2  -10.60    6.30
 -13  -9  -2    6.70    8.30
 -13  -9  -2   -3.80   15.30
 -14  -9  -2    0.10    8.10
 -14  -9  -2   -4.50   16.00
  14 -10  -2   29.30   17.60
 -14  10   2   12.60   11.80
  13 -10  -2   24.10   16.80
 -13  10   2    0.70    8.80
  12 -10  -2  -10.60   12.40
 -12  10   2    0.40    8.30
  11 -10  -2   -1.50   10.90
 -11  10   2   -0.30    8.20
  10 -10  -2   21.40   12.20
 -10  10   2   -8.70    8.00
   9 -10  -2    0.60   11.90
  -9  10   2   10.30    9.70
   8 -10  -2    1.10   11.00
  -8  10   2    8.70    9.30
   7 -10  -2  178.18   56.09
  -7  10   2  117.59   53.49
   6 -10  -2   25.20   13.50
  -6  10   2   11.50   10.60
   5 -10  -2   35.50   13.70
  -5  10   2    3.70    9.20
   4 -10  -2  102.49   41.60
   3 -10  -2  263.17   99.09
   2 -10  -2   57.69   25.50
   1 -10  -2    6.30   10.40
   0 -10  -2  335.57  129.29
   0 -10  -2  305.27  129.49
   0  10   2  379.66  128.99
  -1 -10  -2   -1.90    8.70
  -1 -10  -2   19.20   11.00
   1  10   2    6.20    7.70
  -2 -10  -2   89.39   31.40
  -2 -10  -2   59.29   30.10
  -3 -10  -2  319.37  116.59
  -3 -10  -2  316.07  116.19
   3  10   2  296.37  117.19
  -4 -10  -2  123.39   49.60
  -4 -10  -2  121.39   48.20
  -5 -10  -2   23.10   15.20
  -5 -10  -2   14.80   11.30
  -6 -10  -2   17.80   14.40
  -6 -10  -2    9.30    9.70
  -7 -10  -2  188.08   69.59
  -7 -10  -2  170.48   71.89
  -8 -10  -2   26.50   13.50
  -8 -10  -2   21.40   18.30
  -9 -10  -2   19.70    9.50
  -9 -10  -2   -1.70   13.90
 -10 -10  -2   -7.20   14.20
 -10 -10  -2    8.50    7.40
 -11 -10  -2   25.20   19.60
 -12 -10  -2   38.00   25.60
 -13 -10  -2    1.50   19.70
 -14 -10  -2   38.60   17.10
 -14 -10  -2   28.50   28.00
  13 -11  -2    7.80   17.10
 -13  11   2   14.10   10.40
  12 -11  -2   20.80   15.10
 -12  11   2   -4.00    8.80
  11 -11  -2    8.70   12.80
 -11  11   2   -1.60    9.30
  10 -11  -2    0.30   11.80
 -10  11   2   -0.70    8.30
   9 -11  -2   -3.50   10.40
  -9  11   2   -7.70    8.00
   8 -11  -2   11.70   10.40
  -8  11   2   -8.60    7.30
   7 -11  -2   -2.10   12.10
  -7  11   2   -8.40    7.80
   6 -11  -2   -3.00   10.40
  -6  11   2   -7.60    7.40
   5 -11  -2   -6.10    9.80
   4 -11  -2   21.80   14.00
   3 -11  -2   10.00   11.40
   2 -11  -2   23.30   14.60
   1 -11  -2   -7.10    9.60
   0 -11  -2   11.20   11.20
   0 -11  -2    6.80    6.60
   0  11   2    0.00    6.50
  -1 -11  -2    3.70   10.30
  -1 -11  -2    4.20    8.30
  -2 -11  -2    2.30    8.60
  -2 -11  -2    2.70    9.30
  -3 -11  -2   -0.10    9.60
  -4 -11  -2   18.50   13.10
  -4 -11  -2    0.10    9.40
   4  11   2   21.00   18.90
  -5 -11  -2   -5.80   10.60
  -5 -11  -2   -1.90    8.10
  -6 -11  -2  -11.50    6.50
  -6 -11  -2   13.30   14.40
  -7 -11  -2    1.40    8.30
  -8 -11  -2   -2.40   14.00
  -8 -11  -2   -4.30    5.80
  -9 -11  -2    4.70   16.90
  -9 -11  -2    5.10    7.70
 -10 -11  -2   -0.30    7.60
 -10 -11  -2    0.10   16.30
 -11 -11  -2   -9.00   14.60
 -12 -11  -2    0.20   16.80
 -13 -11  -2    2.20   20.00
  12 -12  -2   26.00   15.10
 -12  12   2   -1.20    8.80
  11 -12  -2   59.09   22.80
 -11  12   2   27.10   18.50
  10 -12  -2   37.40   20.60
 -10  12   2   38.90   18.60
   9 -12  -2   59.59   20.50
  -9  12   2   15.70   15.60
   8 -12  -2   16.10   14.60
  -8  12   2   12.70   10.30
   7 -12  -2   20.90   14.30
  -7  12   2    1.70    8.90
   6 -12  -2   40.40   17.80
  -6  12   2   13.70   13.50
   5 -12  -2  116.89   48.20
   1 -12  -2  166.28   65.79
   0 -12  -2  260.17   87.99
   0 -12  -2  233.38   86.49
   0  12   2  217.18   86.59
  -1 -12  -2  167.68   62.79
  -1 -12  -2  155.18   60.59
  -2 -12  -2   -2.80   10.30
  -2 -12  -2    0.50    9.50
  -3 -12  -2    3.50   10.50
  -3 -12  -2    8.30   10.70
  -4 -12  -2   48.30   19.50
  -4 -12  -2   16.30   14.00
  -5 -12  -2  132.09   49.00
  -5 -12  -2  111.49   50.09
  -6 -12  -2   16.30   16.90
  -6 -12  -2   15.70   12.10
  -7 -12  -2    6.50   13.50
  -7 -12  -2   -7.60    7.80
  -8 -12  -2   -4.20   15.90
  -8 -12  -2   10.80    9.90
  -9 -12  -2   63.19   34.50
  -9 -12  -2   73.29   29.60
 -10 -12  -2   24.20   19.50
 -10 -12  -2    4.80   10.40
 -11 -12  -2   55.29   32.00
 -12 -12  -2   24.40   22.50
  11 -13  -2   -7.50   14.90
 -11  13   2   -1.80    8.80
  10 -13  -2   35.80   15.20
 -10  13   2    1.50   10.40
   9 -13  -2   -3.40   12.50
  -9  13   2   12.00   10.80
  -8  13   2  -15.00    9.40
   7 -13  -2   14.80   13.30
  -7  13   2   -2.40    8.60
   6 -13  -2    2.40   13.40
  -6  13   2   -3.90    8.30
   5 -13  -2    3.60   13.40
  -5  13   2   -0.60    8.40
   4 -13  -2   20.20   15.10
   3 -13  -2   -3.90   11.20
   2 -13  -2    8.00   11.80
   1 -13  -2   15.20   13.50
   0 -13  -2   38.30   16.50
   0  13   2   10.50    9.50
  -1 -13  -2    1.30    8.20
  -1 -13  -2    4.40   11.00
  -2 -13  -2   13.00   10.70
  -2 -13  -2   -5.50   10.80
  -3 -13  -2   -1.00   10.40
  -3 -13  -2   -9.60   12.40
  -4 -13  -2    4.70   11.90
  -4 -13  -2   30.70   15.50
  -5 -13  -2   -2.90    9.30
  -5 -13  -2  -20.10   11.60
  -6 -13  -2  -13.10    7.70
  -6 -13  -2    8.00   14.40
  -7 -13  -2   -0.50   15.60
  -7 -13  -2   -8.20    8.60
  -8 -13  -2  -11.30    7.70
  -8 -13  -2   13.40   16.00
  -9 -13  -2   24.30   18.10
  -9 -13  -2   -2.40    8.60
 -10 -13  -2   -3.70    7.90
 -10 -13  -2    1.40   17.30
 -11 -13  -2    2.70   20.50
  10 -14  -2   63.29   22.30
 -10  14   2   12.40   14.60
   9 -14  -2   21.30   16.10
  -9  14   2  -14.30    9.40
   8 -14  -2   21.70   16.20
  -8  14   2   26.50   14.50
   7 -14  -2   13.00   14.30
  -7  14   2   15.00   11.20
   6 -14  -2   16.90   12.90
  -6  14   2   -1.20   11.10
   5 -14  -2   39.10   18.00
  -5  14   2    6.70   12.10
   4 -14  -2   25.50   17.70
   3 -14  -2   29.10   19.20
   2 -14  -2   51.99   25.90
   1 -14  -2   -3.30   11.70
   0 -14  -2    6.30   13.50
  -1 -14  -2  -12.10    9.80
  -1 -14  -2   19.20    9.90
  -2 -14  -2   84.49   40.40
  -2 -14  -2  101.19   39.20
  -3 -14  -2   32.30   23.60
  -3 -14  -2   66.39   25.10
  -4 -14  -2    0.00   15.30
  -4 -14  -2    6.40   11.60
  -5 -14  -2   41.50   23.90
  -5 -14  -2   53.89   23.20
  -6 -14  -2    9.80   14.10
  -6 -14  -2   39.10   20.70
  -7 -14  -2  -12.50    7.90
  -7 -14  -2   11.10   19.70
  -8 -14  -2    2.60   16.10
  -9 -14  -2   10.30   18.50
  -9 -14  -2    5.00    9.20
 -10 -14  -2   21.80   14.70
 -10 -14  -2   36.40   23.20
   9 -15  -2   18.00   16.10
   8 -15  -2   35.20   18.60
  -8  15   2    6.50   11.60
   7 -15  -2   36.80   15.90
  -7  15   2   -8.10    8.10
   6 -15  -2   -2.70   12.50
  -6  15   2  -11.80    8.20
   5 -15  -2    3.90   14.20
  -5  15   2    0.90   16.30
   4 -15  -2   12.00   15.70
   3 -15  -2  -24.60    9.90
   2 -15  -2    6.70   15.10
   1 -15  -2    3.00   13.50
   0 -15  -2  -11.60   12.60
  -1 -15  -2   11.10   14.50
  -2 -15  -2    0.50   11.70
  -2 -15  -2   17.00   14.00
  -3 -15  -2    4.40   12.70
  -3 -15  -2    5.50   13.80
  -4 -15  -2    5.20   15.40
  -4 -15  -2    4.60   12.50
  -5 -15  -2   -5.50   10.90
  -5 -15  -2   -5.50   14.80
  -6 -15  -2   20.90   18.90
  -7 -15  -2    3.20   14.50
  -7 -15  -2  -13.00    7.60
  -8 -15  -2   -5.60    8.30
  -8 -15  -2   13.10   17.60
  -9 -15  -2   11.80   10.70
  -9 -15  -2    2.50   17.90
   7 -16  -2  -12.50   11.80
  -7  16   2   14.00   10.60
   6 -16  -2   25.30   17.30
  -6  16   2    0.40   10.10
   5 -16  -2    6.10   12.90
  -5  16   2  -12.50    9.10
   4 -16  -2   28.20   18.80
   3 -16  -2   -6.20   15.50
   2 -16  -2   -0.70   15.10
   1 -16  -2   35.00   19.90
   0 -16  -2   55.79   27.80
  -1 -16  -2   24.00   19.70
  -2 -16  -2   13.00   16.80
  -2 -16  -2   26.70   16.70
  -3 -16  -2  -13.20   12.80
  -4 -16  -2    0.20   11.50
  -4 -16  -2   19.10   18.80
  -5 -16  -2    7.10   14.00
  -5 -16  -2   20.20   18.80
  -6 -16  -2    7.60   12.90
  -6 -16  -2   49.90   23.30
  -7 -16  -2   18.50   21.60
  -7 -16  -2   16.50   13.40
   4 -17  -2   10.00   16.20
   3 -17  -2   22.70   16.70
   2 -17  -2   42.50   24.20
   1 -17  -2   11.00   14.80
   0 -17  -2    4.20   14.60
  -1 -17  -2  -13.40   12.40
  -2 -17  -2    1.00   12.70
  -3 -17  -2   14.50   16.60
  -4 -17  -2    2.30   12.00
  -4 -17  -2  -46.60   23.60
  -4 -17   3  -10.40   22.10
  -4 -17   3   -9.60   13.40
  -3 -17   3  -16.90   11.20
  -3 -17   3    9.70   21.00
  -2 -17   3    5.40   14.00
  -1 -17   3   28.60   18.70
   0 -17   3    4.40   13.80
   1 -17   3  -13.60   13.60
  -4  17  -3    4.70   11.70
   4 -17   3   13.80   18.50
  -7 -16   3   -7.40   16.30
  -7 -16   3   11.00   12.70
  -6 -16   3    5.60   19.20
  -6 -16   3   16.70   13.00
  -5 -16   3   44.10   23.00
  -5 -16   3   18.80   14.90
  -4 -16   3   -5.40   14.90
  -4 -16   3   -6.90    9.90
  -3 -16   3   18.10   17.50
  -3 -16   3   24.40   18.60
  -2 -16   3    7.90   14.40
  -1 -16   3   44.50   23.00
   0 -16   3   29.40   18.00
   1 -16   3   62.79   29.80
   2 -16   3   47.20   24.80
   3 -16   3   39.10   22.60
  -4  16  -3   -5.90   10.30
   4 -16   3   49.40   18.40
  -5  16  -3   35.80   18.40
   5 -16   3   24.10   20.70
  -6  16  -3   11.80   11.60
   6 -16   3   11.00   14.40
  -7  16  -3   16.20   12.60
   7 -16   3    2.00   15.10
  -9 -15   3   38.90   26.40
  -8 -15   3   34.40   20.80
  -8 -15   3    8.90   11.70
  -7 -15   3   -7.80   16.20
  -7 -15   3   -3.60    8.10
  -6 -15   3   11.40   16.50
  -5 -15   3  -18.20    8.20
  -5 -15   3    7.40   17.00
  -4 -15   3   10.00   20.50
  -4 -15   3  -12.80   11.60
  -3 -15   3    1.30   11.60
  -3 -15   3   17.30   14.90
  -2 -15   3   21.90   15.90
  -2 -15   3   13.20   13.80
  -1 -15   3   35.70   18.60
   0 -15   3  -11.30    8.80
   1 -15   3    5.80   12.20
   2 -15   3    8.70   13.30
   3 -15   3    1.40   11.90
  -4  15  -3    2.60   11.00
   4 -15   3   -8.70   12.50
   5 -15   3   -8.30   12.70
  -6  15  -3  -12.00    6.70
   6 -15   3    6.00   11.90
  -7  15  -3  -17.60    9.40
   7 -15   3   18.40   13.50
  -8  15  -3   -4.00   10.60
   8 -15   3    1.90   13.50
   9 -15   3   27.80   23.60
 -10 -14   3    7.10   19.00
  -9 -14   3   85.89   40.80
  -8 -14   3   40.50   24.90
  -7 -14   3   12.20   11.40
  -7 -14   3    9.70   17.70
  -6 -14   3   60.19   25.40
  -6 -14   3   19.20   15.30
  -5 -14   3   28.30   19.80
  -5 -14   3   17.70   14.20
  -4 -14   3   23.10   17.80
  -4 -14   3   20.50   15.30
  -3 -14   3    3.70   15.00
  -3 -14   3   26.30   14.00
  -2 -14   3    5.90   13.30
  -2 -14   3   12.60   12.50
  -1 -14   3   26.90   12.90
  -1 -14   3    2.40   11.40
   0 -14   3    5.50   11.00
   1 -14   3    4.00   13.00
   2 -14   3   13.30   13.60
   3 -14   3    0.30   12.90
   4 -14   3   26.70   17.60
  -5  14  -3   16.60   14.60
   5 -14   3   56.09   19.90
  -6  14  -3   -4.90    8.70
   6 -14   3   -6.80   13.60
  -7  14  -3    8.40   11.70
   7 -14   3    2.50   13.40
  -8  14  -3    6.60   11.30
   8 -14   3   24.80   15.60
  -9  14  -3   32.40   15.30
   9 -14   3   12.30   21.00
 -10  14  -3    6.10    8.70
  10 -14   3   -7.10   20.90
 -11 -13   3    6.00   21.10
 -10 -13   3   -3.40   13.90
  -9 -13   3   -6.60    9.00
  -9 -13   3   36.20   19.00
  -8 -13   3   -1.40    7.90
  -8 -13   3   13.70   17.60
  -7 -13   3   22.60   14.60
  -7 -13   3   30.40   20.30
  -6 -13   3    2.30   14.90
  -6 -13   3   24.20   12.20
  -5 -13   3  -16.10   12.20
  -5 -13   3   -1.90    8.70
  -4 -13   3   -7.10    8.70
  -4 -13   3    4.30   13.70
  -3 -13   3    8.10   13.10
  -3 -13   3  -11.70    9.40
  -2 -13   3  -13.60   10.10
  -2 -13   3    2.40   11.20
  -1 -13   3   -3.30    9.40
  -1 -13   3    0.90    9.70
   0 -13   3   -6.20   10.90
   1 -13   3    0.90   12.00
   2 -13   3    5.80   11.80
   3 -13   3   11.40   13.20
   4 -13   3   12.30   12.20
  -5  13  -3    1.10    9.10
   5 -13   3    8.10   13.10
  -6  13  -3   -9.10    7.80
   6 -13   3    1.50   12.90
  -7  13  -3  -10.60    8.80
   7 -13   3  -11.70   11.30
  -8  13  -3    0.60    8.50
   8 -13   3    2.10   10.60
   9 -13   3   30.10   17.80
 -10  13  -3    7.20   11.00
  10 -13   3   15.60   16.20
 -11  13  -3    1.30   12.00
  11 -13   3    8.30   14.20
 -12 -12   3   53.09   30.30
 -11 -12   3   77.39   38.30
 -10 -12   3   13.90   17.20
  -9 -12   3   29.80   21.80
  -8 -12   3   51.29   26.70
  -8 -12   3   39.40   19.50
  -7 -12   3    2.70   18.40
  -7 -12   3   55.19   17.30
  -6 -12   3   36.60   17.60
  -5 -12   3    7.80    9.90
  -5 -12   3    9.30   15.40
  -4 -12   3  106.89   42.30
  -4 -12   3   92.09   40.00
  -3 -12   3   15.70   12.10
  -3 -12   3   12.10   14.50
  -2 -12   3   65.89   28.50
  -2 -12   3   59.99   27.60
  -1 -12   3   24.60   16.60
  -1 -12   3   37.60   17.10
   0 -12   3   -4.80    7.80
   0 -12   3    4.70   15.00
   1 -12   3    7.20   11.50
  -2  12  -3   48.50   19.60
   2 -12   3   32.80   20.80
   3 -12   3   17.90   12.70
   4 -12   3  114.39   46.10
  -5  12  -3    6.70    8.90
   5 -12   3   10.50   12.10
  -6  12  -3   21.20   16.40
   6 -12   3   69.89   21.40
  -7  12  -3   16.10   15.30
   7 -12   3   54.79   19.20
  -8  12  -3   26.90   17.40
   8 -12   3   51.39   20.00
  -9  12  -3   16.40   12.50
   9 -12   3   34.10   21.10
 -10  12  -3   25.30   17.20
  10 -12   3   50.89   20.80
 -11  12  -3   39.10   22.60
  11 -12   3   75.19   26.70
 -12  12  -3   41.50   26.10
  12 -12   3  113.69   32.90
 -13 -11   3    9.20   21.30
 -12 -11   3   14.50   21.70
 -11 -11   3    0.50   16.40
 -10 -11   3  -17.70   12.60
  -9 -11   3   11.80   16.60
  -9 -11   3   -0.50    6.90
  -8 -11   3   -6.40   13.40
  -8 -11   3   -5.50    6.30
  -7 -11   3   17.10    9.40
  -7 -11   3  -13.10   13.20
  -6 -11   3   -7.20    7.10
  -6 -11   3    8.20   14.90
   5  11  -3   -4.90    9.50
  -5 -11   3    2.70   12.30
  -5 -11   3    0.30    8.60
   4  11  -3   44.40   26.30
  -4 -11   3  -10.50   11.40
  -4 -11   3  -11.30    7.10
  -3 -11   3    7.00   11.00
  -3 -11   3   -2.00    8.70
  -2 -11   3  -13.00    8.90
  -2 -11   3   -0.40    9.70
  -1 -11   3  -12.20    7.60
  -1 -11   3    2.20    8.00
   0 -11   3    6.40   10.10
   0 -11   3   -3.20    8.50
  -1  11  -3   26.20   10.50
   1 -11   3   -3.40   10.30
  -2  11  -3    6.20    7.50
   2 -11   3   -0.10    9.30
   3 -11   3   -3.10    9.20
   4 -11   3   22.30   13.60
  -5  11  -3   -8.50    7.10
   5 -11   3    9.80   11.00
  -6  11  -3   -2.70    7.50
   6 -11   3  -27.60    7.80
  -7  11  -3   -3.30    7.70
   7 -11   3    2.80   10.10
  -8  11  -3    2.20    8.90
   8 -11   3   -4.20    9.80
  -9  11  -3   13.60   12.60
   9 -11   3   34.50   15.70
 -10  11  -3   -0.30    9.20
  10 -11   3   12.20   12.90
 -11  11  -3    1.20    9.40
  11 -11   3   19.90   15.60
 -12  11  -3   -0.90    8.10
  12 -11   3    4.80   13.40
 -13  11  -3   34.80   14.50
  13 -11   3    7.70   19.20
 -14 -10   3   19.30   22.00
 -13 -10   3   18.40   18.90
 -12 -10   3   51.59   29.60
 -11 -10   3   -2.80   14.20
 -10 -10   3   38.70   25.00
  -9 -10   3   14.20   10.40
  -9 -10   3   17.60   17.50
  -8 -10   3   44.40   18.70
  -8 -10   3   32.80   23.70
  -7 -10   3   64.19   25.30
  -7 -10   3   52.39   28.60
  -6 -10   3  113.19   47.80
  -6 -10   3  115.59   45.30
  -5 -10   3   69.49   29.30
  -5 -10   3   57.29   26.40
   4  10  -3  104.79   26.10
  -4 -10   3    8.00   15.10
  -4 -10   3   22.20   13.90
  -3 -10   3   23.60   11.40
  -3 -10   3    5.60   10.10
  -2 -10   3   52.79   26.40
  -2 -10   3   72.49   27.40
  -1 -10   3  152.48   60.59
  -1 -10   3  162.38   60.89
   0 -10   3   31.10   13.40
   0 -10   3   18.20   14.30
  -1  10  -3  131.19   51.89
   1 -10   3  148.89   53.39
  -2  10  -3   87.09   31.00
   2 -10   3   60.59   31.70
  -3  10  -3   30.80   11.90
   3 -10   3   13.30   13.80
   4 -10   3   18.40   11.80
  -5  10  -3   48.70   24.80
   5 -10   3   75.59   26.90
  -6  10  -3   35.80   20.10
   6 -10   3   65.99   22.30
  -7  10  -3   35.00   21.00
   7 -10   3   66.59   22.90
  -8  10  -3   28.00   20.50
  -8  10  -3   41.60   20.80
  -8  10  -3   64.59   20.10
   8 -10   3   42.50   21.80
  -9  10  -3   25.40   17.00
  -9  10  -3   43.80   17.30
   9 -10   3   31.20   17.80
 -10  10  -3   44.50   17.40
 -10  10  -3   10.00   13.90
  10 -10   3   37.20   17.00
 -11  10  -3    0.10   12.20
 -11  10  -3   38.00   16.00
  11 -10   3   46.60   16.70
 -12  10  -3   29.70   20.60
 -12  10  -3   62.39   25.00
  12 -10   3   59.59   24.50
 -13  10  -3   47.80   18.80
 -13  10  -3   15.00   15.10
  13 -10   3   24.60   20.60
 -14  10  -3   -3.50    8.30
 -14  -9   3   22.90   20.30
 -14  -9   3   23.00   12.50
 -13  -9   3  -19.50   17.10
 -13  -9   3   -2.20    8.00
 -12  -9   3    7.70   17.20
 -12  -9   3    0.20    6.60
 -11  -9   3    3.00   19.00
 -11  -9   3   -6.10    6.50
 -10  -9   3  -21.30   12.10
  -9  -9   3  -13.20   12.30
  -8  -9   3   -3.60    5.50
  -8  -9   3   -1.30   14.50
  -7  -9   3    0.40    9.10
  -7  -9   3   -3.80   10.60
  -6  -9   3  -12.60    9.70
  -6  -9   3  -11.00    5.60
  -5  -9   3   -7.20    6.20
  -5  -9   3    0.10   10.50
   4   9  -3   16.60   14.30
  -4  -9   3    5.30    9.20
  -4  -9   3   -4.30    5.90
   3   9  -3   13.80   13.50
  -3  -9   3  -13.10    7.40
  -3  -9   3   -2.90    6.60
  -2  -9   3   -4.50    6.80
  -2  -9   3   -3.40    7.50
  -1  -9   3  -16.50    6.10
   0   9  -3    2.20    6.20
   0  -9   3   -5.10    5.90
   0  -9   3   -1.80    7.00
  -1   9  -3   -5.70    5.50
   1  -9   3   -7.10    7.10
   1  -9   3    5.60    5.80
   2  -9   3   -1.30    6.90
  -3   9  -3    8.90    6.40
   3  -9   3    0.00    8.10
  -4   9  -3    7.50    6.30
   4  -9   3   -7.00    8.00
  -5   9  -3    6.90    5.90
  -5   9  -3    0.60    7.40
   5  -9   3   -4.80    8.70
  -6   9  -3   -2.20    5.90
   6  -9   3   -5.00    8.40
  -7   9  -3    2.50    5.90
  -7   9  -3   17.30    8.90
  -7   9  -3   11.70    8.70
   7  -9   3    3.20    8.30
  -8   9  -3    2.10    7.90
  -8   9  -3    2.20    8.50
   8  -9   3    1.50    8.40
  -9   9  -3   -4.80    7.10
  -9   9  -3    7.80   10.80
   9  -9   3   13.10   10.70
 -10   9  -3    4.00   10.60
 -10   9  -3   21.20   12.50
  10  -9   3   11.70   11.40
 -11   9  -3   15.90   12.80
 -11   9  -3   19.40   11.00
  11  -9   3   15.90   12.40
 -12   9  -3  -10.00    7.90
 -12   9  -3    7.90   11.70
  12  -9   3   -0.60   10.30
 -13   9  -3   -1.70    9.50
 -13   9  -3   12.20   16.90
  13  -9   3   22.40   14.60
 -14   9  -3  -15.00    8.10
 -14   9  -3    4.60   13.80
  14  -9   3    5.80   14.20
 -15  -8   3   63.59   42.00
 -15  -8   3  123.49   40.00
 -14  -8   3    1.20   21.40
 -14  -8   3   21.50   11.10
 -13  -8   3   27.10   21.60
 -12  -8   3    7.50    8.90
 -12  -8   3   12.60   17.00
 -11  -8   3    3.00   14.10
 -11  -8   3    4.90    6.80
 -10  -8   3   68.19   30.60
 -10  -8   3  104.09   38.00
  -9  -8   3   84.49   39.50
  -9  -8   3  119.89   44.00
  -8  -8   3   49.10   25.70
  -8  -8   3   49.80   21.30
  -7  -8   3   82.39   33.90
  -7  -8   3   69.39   29.50
  -6  -8   3  146.19   61.39
  -6  -8   3  187.98   64.59
  -5  -8   3   14.50   10.80
  -5  -8   3   32.40   15.00
   4   8  -3   21.90   15.30
  -4  -8   3   32.50   13.60
  -4  -8   3   25.60   14.40
  -3  -8   3   35.30   13.80
  -3  -8   3   21.60   14.90
   2   8  -3   46.00   23.10
  -2  -8   3   42.80   21.00
  -2  -8   3   59.39   21.10
   1   8  -3  174.88   64.49
  -1  -8   3  182.78   63.89
  -1  -8   3  153.88   63.89
   0   8  -3  150.88   51.69
   0  -8   3  119.59   51.39
   0  -8   3  142.79   51.69
  -1   8  -3  165.88   60.39
   1  -8   3  157.38   59.79
   1  -8   3  154.48   60.29
  -2   8  -3   59.19   23.20
   2  -8   3   54.69   23.90
  -3   8  -3   20.40   11.90
   3  -8   3   40.40   13.80
  -4   8  -3   25.10   14.20
  -4   8  -3   30.10   14.30
   4  -8   3   53.39   16.30
  -5   8  -3   30.70   14.90
  -5   8  -3   33.50   14.30
   5  -8   3   36.50   16.30
  -6   8  -3  108.79   43.60
  -6   8  -3  117.69   44.40
  -6   8  -3  108.09   43.00
   6  -8   3  147.09   45.20
  -7   8  -3   57.19   28.10
  -7   8  -3   67.59   28.50
   7  -8   3   89.69   29.30
  -8   8  -3   50.99   24.10
  -8   8  -3   27.50   16.00
   8  -8   3   37.90   16.60
  -9   8  -3   92.49   38.50
  -9   8  -3   94.79   39.60
   9  -8   3  105.49   39.10
 -10   8  -3   58.99   33.10
 -10   8  -3   92.99   35.50
  10  -8   3  108.89   34.60
 -11   8  -3    6.30    7.70
 -11   8  -3   -6.40    9.90
  11  -8   3   -0.60    7.60
 -12   8  -3    4.80   10.10
 -12   8  -3   14.90   15.30
  12  -8   3   39.80   14.60
 -13   8  -3   20.90   16.80
 -13   8  -3   18.70   11.70
  13  -8   3   17.10   13.20
 -14   8  -3   39.90   19.30
 -14   8  -3   14.60   14.80
  14  -8   3   10.90   15.40
 -15   8  -3  111.29   35.80
 -15   8  -3   41.00   29.20
  15  -8   3   98.09   35.30
 -15  -7   3   10.40    9.40
 -15  -7   3   41.00   23.90
 -14  -7   3   23.60   19.80
 -14  -7   3    3.90    8.80
 -13  -7   3   34.90   24.20
 -12  -7   3   -6.20    6.80
 -12  -7   3   -5.00   13.70
 -11  -7   3  -13.30    6.10
 -11  -7   3    1.80   13.70
 -10  -7   3   -0.90    6.00
 -10  -7   3   -2.00    9.20
  -9  -7   3   -3.70    4.90
  -9  -7   3    6.90   18.80
  -8  -7   3   -4.60    5.20
  -8  -7   3    9.70   10.90
  -7  -7   3    3.40   10.40
  -7  -7   3   -6.50    5.10
  -7  -7   3    8.20    6.70
  -6  -7   3   -7.20    4.70
  -6  -7   3    1.80    8.70
  -5  -7   3    8.50    7.00
  -5  -7   3    5.20    9.70
   4   7  -3   -2.00    7.20
  -4  -7   3   -4.10    5.00
  -4  -7   3    5.30    9.00
   3   7  -3   15.70   10.90
  -3  -7   3   10.80    7.00
  -3  -7   3   -6.80    7.20
   2   7  -3   -5.00   14.10
  -2  -7   3    4.10    6.80
  -2  -7   3   -2.60    5.70
   1   7  -3    0.90   11.50
   1   7  -3    6.20    6.90
  -1  -7   3   -1.80    6.20
  -1  -7   3    6.30    6.50
   0   7  -3    1.00    5.80
   0  -7   3   -3.90    5.30
   0  -7   3   -1.80    5.80
  -1   7  -3    3.50    5.90
   1  -7   3   -3.70    6.70
   1  -7   3    4.80    5.10
  -2   7  -3    3.30    4.80
   2  -7   3   -1.60    6.50
  -3   7  -3    0.40    4.90
   3  -7   3   -1.50    6.40
  -4   7  -3    1.40    5.80
  -4   7  -3    4.40    4.50
   4  -7   3   -9.20    7.10
  -5   7  -3   -2.90    5.50
  -5   7  -3   -7.30    6.20
   5  -7   3   -4.00    6.60
  -6   7  -3    6.90    7.00
  -6   7  -3   -2.20    6.30
   6  -7   3   -1.60    6.60
  -7   7  -3   -4.90    6.90
  -7   7  -3   -9.70    5.40
   7  -7   3   -5.70    6.00
  -8   7  -3    1.90    8.30
  -8   7  -3   -6.60    8.40
   8  -7   3    3.40    7.60
  -9   7  -3   19.10   11.10
  -9   7  -3    4.80    8.20
   9  -7   3   -7.90    6.60
 -10   7  -3   -3.40    7.60
 -10   7  -3    3.30   10.70
  10  -7   3   30.10    9.50
 -11   7  -3   -8.60    6.60
 -11   7  -3    9.70   13.50
  11  -7   3   22.60   10.60
 -12   7  -3   -1.60    7.70
 -12   7  -3   43.60   17.70
  12  -7   3    4.90    9.20
 -13   7  -3   -2.70   13.60
 -13   7  -3   -7.50    8.30
  13  -7   3    5.00    9.70
 -14   7  -3   -8.20    9.20
 -14   7  -3    3.90   15.70
  14  -7   3    3.40    9.90
 -15   7  -3   -5.80   10.50
 -15   7  -3    9.40   17.10
  15  -7   3  -16.70   15.30
 -16  -6   3    3.10   17.80
 -15  -6   3    7.10   17.50
 -15  -6   3   19.70   10.10
 -14  -6   3    5.40   15.70
 -14  -6   3    1.00    6.90
 -13  -6   3   13.90    9.60
 -13  -6   3   29.20   20.20
 -12  -6   3   -1.30    6.40
 -12  -6   3   -6.50   13.60
 -11  -6   3   17.40   15.10
 -11  -6   3    0.70    5.50
 -10  -6   3   57.69   22.80
 -10  -6   3   52.29   28.50
  -9  -6   3  219.68   75.39
  -9  -6   3  178.18   69.89
  -8  -6   3  114.69   46.50
  -8  -6   3  108.69   42.20
  -7  -6   3   96.69   43.60
  -7  -6   3  117.49   41.20
  -7  -6   3  101.39   40.50
  -6  -6   3   51.69   17.30
  -6  -6   3   22.60   13.40
  -6  -6   3   27.80   13.00
  -5  -6   3   -0.60    8.10
  -5  -6   3    4.30    6.10
  -5  -6   3   17.40    6.20
  -4  -6   3  465.65  176.48
  -4  -6   3  480.45  175.78
   3   6  -3   34.20   23.50
  -3  -6   3   85.39   22.80
   2   6  -3   62.49   37.20
   2   6  -3  103.39   37.00
  -2  -6   3  124.09   37.70
  -2  -6   3   98.29   36.20
   1   6  -3   69.79   43.20
   1   6  -3  105.29   38.50
  -1  -6   3   98.99   38.30
  -1  -6   3  107.19   38.20
   0   6  -3  127.89   50.99
   0  -6   3  144.29   50.99
   0  -6   3  132.19   50.89
  -1   6  -3  102.99   38.60
   1  -6   3   94.89   38.40
   1  -6   3  111.69   38.90
  -2   6  -3  108.29   40.30
  -2   6  -3   93.99   39.70
   2  -6   3  128.69   40.80
  -3   6  -3  118.89   38.40
  -3   6  -3   94.09   37.90
   3  -6   3   89.89   38.20
  -4   6  -3  511.35  185.88
  -4   6  -3  502.95  186.08
  -4   6  -3  470.35  186.08
   4  -6   3  515.05  186.08
  -5   6  -3   -0.20    5.70
  -5   6  -3    1.10    5.80
  -5   6  -3   -1.70    5.50
   5  -6   3    2.80    5.80
  -6   6  -3   27.10   13.90
  -6   6  -3   27.10   14.50
   6  -6   3   40.50   14.50
  -7   6  -3   86.49   37.60
  -7   6  -3   94.19   36.70
   7  -6   3  104.69   37.60
  -8   6  -3  154.88   48.40
  -8   6  -3   86.59   46.00
   8  -6   3  129.99   46.50
  -9   6  -3  167.28   69.89
  -9   6  -3  179.08   71.09
   9  -6   3  205.68   69.89
 -10   6  -3   45.90   23.30
 -10   6  -3   52.59   21.30
  10  -6   3   50.89   21.40
 -11   6  -3   -9.70   10.50
 -11   6  -3    1.70    7.20
  11  -6   3    6.60    7.90
 -12   6  -3   -1.70    7.80
 -12   6  -3   18.70   15.00
  12  -6   3   17.10    9.80
 -13   6  -3   31.10   16.60
 -13   6  -3   11.80   10.30
  13  -6   3    6.40   10.80
 -14   6  -3   -3.20   10.70
 -14   6  -3   18.50   17.10
  14  -6   3   30.40   13.60
 -15   6  -3   24.50   23.20
  15  -6   3   43.30   19.40
 -16   6  -3   50.09   28.40
 -16   6  -3   37.70   21.30
  16  -6   3   56.79   25.00
 -16  -5   3    0.40   21.80
 -16  -5   3   59.19   17.00
 -15  -5   3   19.20    8.30
 -15  -5   3   -9.50   12.20
 -14  -5   3   -4.60   15.80
 -14  -5   3   26.50   10.00
 -13  -5   3   10.70    8.10
 -13  -5   3    8.90   16.90
 -12  -5   3    4.80   13.30
 -12  -5   3   -3.20    6.00
 -11  -5   3   -6.70    5.20
 -11  -5   3    9.40   14.10
 -10  -5   3   -0.40    4.40
 -10  -5   3   -6.20   11.70
  -9  -5   3   -8.40    9.60
  -8  -5   3   -9.20    3.80
  -8  -5   3    7.20   11.00
  -7  -5   3    0.90    3.90
  -7  -5   3    1.20    9.70
  -6  -5   3   -2.20    7.50
  -6  -5   3   -0.40    4.20
  -6  -5   3    4.00    4.70
  -5  -5   3   -2.20    4.20
  -5  -5   3    1.90    7.10
  -5  -5   3   -4.50    3.70
  -4  -5   3   -7.50    3.80
  -4  -5   3   -5.30    4.70
  -4  -5   3    9.80    7.50
   3   5  -3   -7.30    7.10
  -3  -5   3    4.60    5.50
  -3  -5   3    0.40    6.50
   2   5  -3    0.00    3.00
   2   5  -3   -0.20    6.60
  -2  -5   3   -3.20    5.90
  -2  -5   3   -5.00    5.00
   1   5  -3   -5.90    5.30
   1   5  -3   -8.50   11.90
   1   5  -3   -3.30    5.70
  -1  -5   3   -3.40    5.10
  -1  -5   3    5.10    5.70
   0   5  -3    1.60   22.00
   0   5  -3    0.00    5.40
   0   5  -3    0.60    5.50
   0  -5   3   -0.10    5.10
   0  -5   3    1.50    5.90
  -1   5  -3    1.20    5.20
  -1   5  -3   -1.90   11.80
  -1   5  -3    6.50    5.40
   1  -5   3   -4.10    4.50
   1  -5   3   -3.70    5.40
  -2   5  -3  -10.10    4.50
  -2   5  -3    4.60   14.00
  -2   5  -3   -7.90    4.20
   2  -5   3    7.60    6.00
  -3   5  -3    4.70    4.80
  -3   5  -3    5.10    5.20
  -3   5  -3   -8.50    4.50
   3  -5   3    1.80    5.50
  -4   5  -3   -1.20    4.60
  -4   5  -3    5.60    5.60
   4  -5   3    4.20    5.40
  -5   5  -3    7.00    5.80
  -5   5  -3    1.60    4.30
  -5   5  -3    6.80    5.80
   5  -5   3   -2.90    5.00
  -6   5  -3   -1.10    6.50
  -6   5  -3    2.80    5.40
   6  -5   3    4.50    5.80
  -7   5  -3    3.20    8.10
  -7   5  -3   -0.20    5.60
   7  -5   3    3.70    6.10
  -8   5  -3   -3.80    7.90
  -8   5  -3   -3.70    5.00
   8  -5   3   -4.10    7.70
  -9   5  -3   -0.30   10.10
  -9   5  -3    5.80    6.80
   9  -5   3    4.90    6.50
 -10   5  -3    7.40   11.40
 -10   5  -3    2.30    6.70
  10  -5   3    2.20    6.60
 -11   5  -3    5.00    6.50
 -11   5  -3    9.50   12.30
  11  -5   3   -6.00    7.40
 -12   5  -3   -3.60   13.00
 -12   5  -3    2.40    7.10
  12  -5   3    0.80    7.60
 -13   5  -3   -9.50    8.00
  13  -5   3    8.50    9.40
 -14   5  -3  -11.30    7.90
  14  -5   3   14.30    9.90
 -15   5  -3   -9.10    9.60
 -15   5  -3   15.00   17.40
  15  -5   3   21.90   12.90
 -16   5  -3   18.90   15.00
 -16   5  -3   31.80   22.80
  16  -5   3   36.30   18.70
 -16  -4   3   59.99   17.30
 -16  -4   3    5.00   21.60
 -15  -4   3   28.20    9.30
 -15  -4   3  -10.70   15.10
 -14  -4   3    4.50   19.30
 -14  -4   3   16.10    8.40
 -13  -4   3   23.70   19.00
 -13  -4   3   16.10    9.10
 -12  -4   3  109.89   40.80
 -12  -4   3   95.99   46.60
 -11  -4   3   19.00   16.50
 -11  -4   3   24.40   10.70
 -10  -4   3  134.09   53.69
 -10  -4   3  196.28   60.29
  -9  -4   3  138.99   52.29
  -9  -4   3  141.59   56.49
  -8  -4   3   90.39   35.50
  -8  -4   3  101.09   39.80
  -7  -4   3  184.18   45.90
  -7  -4   3   92.69   39.30
  -6  -4   3  139.39   54.59
  -6  -4   3  171.28   57.79
  -5  -4   3  139.39   50.09
  -5  -4   3  122.79   48.50
  -5  -4   3  131.89   48.70
   4   4  -3  867.41  289.67
  -4  -4   3  751.82  289.67
  -4  -4   3  752.82  290.27
  -4  -4   3  740.93  290.47
   3   4  -3  518.05  183.88
   3   4  -3  510.75  184.18
   3   4  -3  463.85  184.58
  -3  -4   3  461.95  183.88
  -3  -4   3  486.65  184.58
  -3  -4   3  536.15  184.08
   2   4  -3  125.19   42.90
   2   4  -3  105.79   42.30
   2   4  -3  115.99   43.40
  -2  -4   3  103.89   42.70
  -2  -4   3  130.89   44.10
   1   4  -3   28.10   13.00
   1   4  -3   28.70   13.50
  -1  -4   3   31.60   13.20
  -1  -4   3   28.00   12.90
   0   4  -3  456.35  167.38
   0   4  -3  450.35  167.48
   0  -4   3  453.65  167.38
   0  -4   3  446.66  167.38
  -1   4  -3   39.10   13.80
  -1   4  -3   37.90   13.60
  -1   4  -3   13.50   19.90
   1  -4   3   21.50   13.30
   1  -4   3   34.50   13.40
  -2   4  -3   98.89   39.40
  -2   4  -3   49.80   43.20
  -2   4  -3  108.39   39.40
   2  -4   3  133.89   39.70
  -3   4  -3  554.74  195.78
  -3   4  -3  543.65  195.18
   3  -4   3  495.45  195.18
  -4   4  -3  873.41  293.07
  -4   4  -3  740.33  293.17
   4  -4   3  757.92  293.07
  -5   4  -3  136.59   55.39
  -5   4  -3  133.19   54.99
   5  -4   3  164.98   54.89
  -6   4  -3  145.59   54.79
  -6   4  -3  136.39   55.39
   6  -4   3  152.78   54.59
  -7   4  -3  159.28   44.80
  -7   4  -3   97.99   41.90
   7  -4   3  101.69   41.60
  -8   4  -3  100.19   34.60
  -8   4  -3   63.79   31.30
   8  -4   3   90.59   31.90
  -9   4  -3  151.68   54.69
  -9   4  -3  202.28   58.59
   9  -4   3  123.89   54.09
 -10   4  -3  219.68   80.19
 -10   4  -3  225.78   83.79
  10  -4   3  205.78   80.09
 -11   4  -3   -2.60   12.40
 -11   4  -3   21.50    9.60
  11  -4   3   19.90    9.80
 -12   4  -3   81.29   37.40
 -12   4  -3   97.19   42.50
  12  -4   3  118.69   38.80
 -13   4  -3    7.10    9.70
 -13   4  -3    4.20   13.60
  13  -4   3   16.00    9.80
 -14   4  -3   -2.70    8.40
 -14   4  -3   33.20   17.40
  14  -4   3   13.20   10.60
 -15   4  -3   12.40   16.50
 -15   4  -3   -1.30    8.90
  15  -4   3   15.30   12.20
 -16   4  -3  -11.30   13.40
 -16   4  -3   -3.40    9.60
  16  -4   3   32.90   14.60
 -17  -3   3   93.59   31.20
 -17  -3   3   40.70   36.20
 -16  -3   3    2.50   24.10
 -16  -3   3   45.30   15.50
 -15  -3   3  -15.40   14.90
 -15  -3   3   21.70    8.00
 -14  -3   3    4.20    5.40
 -14  -3   3   -0.70   16.70
 -13  -3   3    6.70    5.40
 -13  -3   3    4.40   14.70
 -12  -3   3    7.30    5.00
 -12  -3   3  -12.90   11.60
 -11  -3   3   -9.20   13.70
 -11  -3   3    2.60    4.50
 -10  -3   3   -1.10    3.80
 -10  -3   3   -1.70   10.50
 -10  -3   3    7.50   13.10
  -9  -3   3   10.50   11.50
  -9  -3   3   -4.00    3.20
  -8  -3   3   -6.40    3.20
  -8  -3   3   11.40   11.20
  -8  -3   3   -0.20    7.90
   7   3  -3    3.20    8.20
  -7  -3   3   -5.10    7.50
  -7  -3   3   -4.20    3.10
  -7  -3   3   -1.20    8.00
   6   3  -3   -4.40    7.40
  -6  -3   3   -0.80    7.50
  -6  -3   3   -2.80    6.60
  -6  -3   3   -4.50    2.90
   5   3  -3    0.70    3.40
   5   3  -3   -2.20    7.40
  -5  -3   3   -4.40    3.40
  -5  -3   3   -7.90    6.50
  -5  -3   3    6.50    7.90
   4   3  -3  -10.30    3.70
   4   3  -3   -1.70    2.60
   4   3  -3   12.80    8.80
   4   3  -3   -1.10    6.90
  -4  -3   3   -8.30    7.30
  -4  -3   3   -3.50    3.40
  -4  -3   3    3.40    4.20
  -4  -3   3    2.80    7.50
   3   3  -3    5.80    7.50
   3   3  -3   -3.60    6.70
   3   3  -3   -2.10    4.00
   3   3  -3    3.30    2.70
  -3  -3   3   -2.80    4.00
  -3  -3   3    2.90    3.40
  -3  -3   3    0.40    6.30
   2   3  -3    3.70    6.90
   2   3  -3    2.20    2.90
   2   3  -3    0.00    5.30
  -2  -3   3    0.20    6.10
  -2  -3   3    1.40    4.40
   1   3  -3   -7.40    5.20
   1   3  -3   -6.50    4.40
  -1  -3   3    3.50    4.50
  -1  -3   3   -3.60    5.20
   0   3  -3   -3.60    4.20
   0   3  -3    2.10    5.20
   0  -3   3   -1.80    4.50
   0  -3   3    1.10    5.10
  -1   3  -3    4.70    5.00
  -1   3  -3    2.20    4.60
   1  -3   3    6.70    5.00
  -2   3  -3   27.70   15.70
  -2   3  -3    1.80    4.30
  -2   3  -3   -1.90    3.90
   2  -3   3   -1.30    4.20
  -3   3  -3    5.20    4.50
  -3   3  -3    1.00    4.20
  -3   3  -3    4.30   15.40
   3  -3   3   -0.40    4.40
  -4   3  -3   -3.40    4.80
  -4   3  -3   -7.20   10.90
   4  -3   3    2.80    3.70
   4  -3   3    6.60    4.50
  -5   3  -3    4.50    4.70
  -5   3  -3   -3.00    5.50
   5  -3   3   -4.00    3.90
  -6   3  -3    6.40    7.90
  -6   3  -3   -1.10    4.20
   6  -3   3    2.00    3.70
  -7   3  -3   -2.20    4.10
  -7   3  -3    6.60    8.40
   7  -3   3   -1.40    4.20
  -8   3  -3    4.30    8.80
  -8   3  -3    0.20    4.10
   8  -3   3    4.80    4.90
  -9   3  -3    3.30    5.20
  -9   3  -3   -3.40    8.30
 -10   3  -3    3.20    5.80
 -10   3  -3   -1.90    9.70
  10  -3   3    0.80    5.50
 -11   3  -3   -3.60    5.70
 -11   3  -3    1.10   12.80
  11  -3   3    1.30    6.60
 -12   3  -3    1.90    7.40
 -12   3  -3   36.70   17.40
  12  -3   3   -2.80    7.20
 -13   3  -3    3.70    7.40
 -13   3  -3   -4.70   11.40
  13  -3   3   13.80    9.00
 -14   3  -3   26.00   18.10
 -14   3  -3  -11.10    7.30
  14  -3   3   19.40   10.70
 -15   3  -3   -2.30    9.60
 -15   3  -3    4.80   14.90
  15  -3   3   15.20   11.10
 -16   3  -3   13.20   17.30
  16  -3   3    2.10   13.00
 -17   3  -3    5.80   19.00
 -17   3  -3  -19.80    9.50
  17  -3   3    8.90   17.00
 -17  -2   3   52.59   28.10
 -16  -2   3   94.19   50.29
 -16  -2   3  116.89   42.70
 -15  -2   3  -14.80   14.70
 -15  -2   3   32.00    9.30
 -14  -2   3   -7.30   15.40
 -14  -2   3   30.20    9.90
 -13  -2   3    7.40   16.40
 -13  -2   3   21.40    9.30
 -12  -2   3   14.90   12.00
 -12  -2   3   39.20   19.50
 -11  -2   3    3.70   13.40
 -11  -2   3    4.50    5.20
 -10  -2   3  143.39   56.89
 -10  -2   3  212.28   63.39
  -9  -2   3   15.70   14.30
  -9  -2   3    1.50   11.30
  -9  -2   3   13.80    6.30
   8   2  -3   48.60   17.00
  -8  -2   3   27.60   15.40
  -8  -2   3   21.80   15.30
  -8  -2   3   18.10   10.00
   7   2  -3  140.19   50.29
  -7  -2   3  220.18   54.99
  -7  -2   3  136.89   50.19
  -7  -2   3  111.69   49.00
   6   2  -3  305.87  106.59
  -6  -2   3  262.27  107.19
  -6  -2   3  271.47  105.79
  -6  -2   3  294.87  106.49
   5   2  -3  624.04  221.38
   5   2  -3  604.54  221.28
  -5  -2   3  585.84  221.28
  -5  -2   3  591.04  220.88
  -5  -2   3  577.44  221.98
   4   2  -3  199.68   74.09
   4   2  -3  229.98   73.39
   4   2  -3  183.18   73.69
  -4  -2   3  193.18   74.19
  -4  -2   3  208.28   72.99
  -4  -2   3  174.18   73.49
   3   2  -3   10.10   10.70
   3   2  -3    2.70   10.60
   3   2  -3   27.90    8.70
   3   2  -3   25.20    7.40
  -3  -2   3    3.50   10.40
  -3  -2   3   20.50   10.40
  -3  -2   3   19.40    7.60
   2   2  -3 1519.45  566.54
   2   2  -3 1661.73  566.04
   2   2  -3 1527.75  566.24
  -2  -2   3 1413.36  566.44
  -2  -2   3 1540.55  566.14
  -2  -2   3 1518.55  566.04
   1   2  -3  237.48   88.39
   1   2  -3  224.38   88.19
  -1  -2   3  251.17   88.39
  -1  -2   3  239.88   88.09
   0   2  -3 2253.87  777.02
   0   2  -3 1965.50  777.12
   0  -2   3 1938.91  777.12
   0  -2   3 2255.07  777.02
  -1   2  -3  214.78   81.99
   1  -2   3  228.18   81.99
  -2   2  -3 1500.75  577.04
  -2   2  -3 1731.73  576.94
   2  -2   3 1571.94  576.94
   2  -2   3 1434.16  576.94
  -3   2  -3   10.00    7.80
  -3   2  -3    4.00   16.40
   3  -2   3   21.90    7.70
   3  -2   3   22.90    7.90
  -4   2  -3  202.48   66.29
  -4   2  -3  139.59   66.99
  -4   2  -3  179.98   65.59
   4  -2   3  201.08   65.49
   4  -2   3  149.69   65.39
  -5   2  -3  626.84  215.98
  -5   2  -3  546.45  215.18
  -6   2  -3  285.47   97.99
  -6   2  -3  245.58   96.79
  -7   2  -3  155.48   58.09
  -7   2  -3  145.19   55.19
  -8   2  -3   28.60   11.40
  -8   2  -3   22.50   15.30
  -9   2  -3   17.50    8.50
  -9   2  -3   16.60   13.40
 -10   2  -3  216.08   78.09
 -10   2  -3  190.38   81.69
 -11   2  -3   11.30    9.10
 -11   2  -3   10.20   14.70
 -12   2  -3   28.50   19.50
 -12   2  -3   28.10   12.80
 -13   2  -3    0.40   13.40
 -13   2  -3    5.50    7.50
 -14   2  -3   22.30   13.00
 -14   2  -3   20.90   20.00
  14  -2   3   33.40   14.40
 -15   2  -3   -6.80    8.40
 -15   2  -3   -3.60   14.70
  15  -2   3   24.30   10.60
 -16   2  -3  135.49   43.00
 -16   2  -3   55.99   28.60
 -17   2  -3   62.89   33.50
  17  -2   3  129.19   38.10
 -17  -1   3    6.00   15.90
 -16  -1   3   57.69   20.00
 -16  -1   3   25.30   26.00
 -15  -1   3   16.00   18.60
 -15  -1   3   22.80   10.20
 -14  -1   3   11.60    7.50
 -14  -1   3   12.50   15.50
 -13  -1   3    2.20   14.30
 -13  -1   3    1.10    5.60
 -12  -1   3   -9.70    5.00
 -12  -1   3   -1.30   13.40
 -11  -1   3  -15.80   10.10
 -11  -1   3   -4.40    4.80
 -10  -1   3  -10.50   10.50
 -10  -1   3    3.80    4.70
  -9  -1   3   -1.70    3.80
  -9  -1   3  -15.20    8.30
   8   1  -3  -11.80   11.90
  -8  -1   3   -3.30    8.70
  -8  -1   3    4.60    3.80
  -8  -1   3   14.20   13.30
   7   1  -3   13.30   12.40
  -7  -1   3   -0.40    3.40
  -7  -1   3   11.60    9.90
  -7  -1   3   14.70   13.70
   6   1  -3   -0.80    2.40
   6   1  -3    4.30   10.80
  -6  -1   3   -1.60    7.00
  -6  -1   3    1.70    3.20
  -6  -1   3    2.10   11.50
   5   1  -3   -4.00    6.20
   5   1  -3   -0.90    2.20
   5   1  -3    5.40   11.10
  -5  -1   3   -4.60   10.50
  -5  -1   3    1.40    7.90
  -5  -1   3    2.90    2.90
   4   1  -3    2.00    6.70
   4   1  -3    2.80    2.30
   4   1  -3   -2.40   11.60
  -4  -1   3    2.70    2.40
  -4  -1   3   -4.70    7.30
  -4  -1   3   -2.10   10.50
   3   1  -3    4.10    2.00
   3   1  -3   -3.00   11.00
   3   1  -3    1.20    6.50
  -3  -1   3   -7.00    6.00
  -3  -1   3   -2.40    2.10
  -3  -1   3   11.20   10.30
   2   1  -3   -6.90    4.90
   2   1  -3    6.30    8.80
   2   1  -3    0.80    1.60
  -2  -1   3   -4.20    4.70
  -2  -1   3   -1.20    7.80
  -2  -1   3   -5.60    1.80
   1   1  -3   -0.90    4.00
   1   1  -3    3.80    6.50
   1   1  -3    1.90    1.40
   1   1  -3   -2.20    1.90
  -1  -1   3   -1.20    3.80
  -1  -1   3    1.10    1.50
  -1  -1   3   -8.00    6.50
   0   1  -3    1.40    1.70
   0   1  -3   -2.30    2.60
   0  -1   3   -1.10    2.50
   0  -1   3    1.20    1.70
  -1   1  -3    0.40    1.50
  -1   1  -3   -1.90    2.10
   1  -1   3    3.60    2.00
   1  -1   3    1.00    1.70
  -2   1  -3    0.90    2.60
   2  -1   3   -4.10    1.80
   2  -1   3    1.30    2.20
  -3   1  -3   -3.60    5.60
  -3   1  -3    0.30    2.80
   3  -1   3    0.50    2.40
  -4   1  -3    6.80    7.30
  -4   1  -3    2.10    3.10
  -4   1  -3    1.70   11.60
   4  -1   3    1.40    3.00
  -5   1  -3  -10.40   12.30
  -5   1  -3    9.70    4.40
  -5   1  -3   -0.40    6.50
   5  -1   3   -1.00    2.70
  -6   1  -3   -5.10   12.50
  -6   1  -3   -5.40    6.30
  -6   1  -3   -0.10    3.40
  -7   1  -3   -5.00    7.30
  -7   1  -3    4.40    3.70
  -8   1  -3    0.80    8.20
  -8   1  -3   10.00    4.30
   8  -1   3   -2.60    3.10
  -9   1  -3   -3.30    4.00
  -9   1  -3    1.80   10.10
 -10   1  -3   -0.40    4.80
 -10   1  -3   13.30   12.50
 -11   1  -3   -2.50    5.40
 -11   1  -3   -5.70   10.50
 -12   1  -3    2.50    6.40
 -12   1  -3   -3.60   13.80
 -13   1  -3   11.10   13.70
 -13   1  -3   -2.00    6.90
 -14   1  -3   10.50   15.70
 -14   1  -3   -1.00    7.20
 -15   1  -3   41.60   21.80
 -15   1  -3    7.40    9.70
 -16   1  -3   13.60   10.10
 -16   1  -3   12.10   20.00
 -17   1  -3   19.30   20.20
 -17   1  -3   -1.10    8.10
  17  -1   3    3.60   13.40
 -17   0   3   -0.80   14.70
 -16   0   3   14.80   18.70
 -16   0   3   15.10    9.30
 -15   0   3   15.30    8.90
 -15   0   3   10.70   18.30
 -14   0   3   -7.20    6.50
 -14   0   3   17.70   17.40
 -13   0   3   48.70   29.60
 -13   0   3   62.99   23.60
 -12   0   3   27.80   25.50
 -12   0   3   20.40   10.40
 -11   0   3   94.39   35.60
 -11   0   3   93.19   41.20
 -10   0   3   -5.70   10.60
 -10   0   3    1.30    4.40
   9   0  -3  310.77  121.39
  -9   0   3  339.87  119.59
  -9   0   3  300.27  121.49
   8   0  -3  193.48   80.89
  -8   0   3  236.98   78.99
  -8   0   3  179.98   80.59
   7   0  -3    8.00   15.10
  -7   0   3   11.80    5.50
  -7   0   3   14.00   15.70
  -7   0   3   12.00   10.30
   6   0  -3  200.28   52.39
  -6   0   3  113.99   47.40
  -6   0   3  123.79   50.09
  -6   0   3  131.39   49.40
   5   0  -3  189.78   72.99
   5   0  -3  148.89   71.89
   5   0  -3  238.28   73.49
  -5   0   3  226.88   71.89
  -5   0   3  182.28   73.39
  -5   0   3  189.08   73.09
   4   0  -3  212.38   76.09
   4   0  -3  164.68   75.49
  -4   0   3  208.38   75.99
  -4   0   3  200.18   75.69
  -4   0   3  212.28   74.69
   3   0  -3  404.76  159.28
   3   0  -3  443.56  159.48
  -3   0   3  448.06  159.48
  -3   0   3  439.26  158.78
  -3   0   3  403.76  159.38
   2   0  -3  928.81  350.16
   2   0  -3  928.61  350.26
  -2   0   3  928.91  349.87
  -2   0   3 1010.50  350.26
  -2   0   3  940.11  350.16
   1   0  -3   57.39   22.40
   1   0  -3   74.79   22.90
  -1   0   3   68.49   23.20
  -1   0   3   52.99   22.40
  -1   0   3   78.59   22.80
  -1   0  -3   98.59   31.70
  -1   0  -3   80.79   31.70
   1   0   3   83.69   31.80
   1   0   3   80.39   31.70
  -2   0  -3 1033.60  371.56
  -2   0  -3  947.41  371.16
   2   0   3 1050.59  371.26
   2   0   3  992.90  371.16
  -3   0  -3  437.46  156.98
   3   0   3  398.66  156.38
   3   0   3  436.96  156.38
  -4   0  -3  208.38   67.89
   4   0   3  149.19   66.69
   4   0   3  171.88   67.59
   4   0   3  205.68   66.79
  -5   0  -3  219.18   69.29
  -5   0  -3  174.58   69.39
   5   0   3  197.88   67.89
   5   0   3  195.48   68.79
   5   0   3  152.48   67.79
  -6   0  -3  110.09   47.50
  -6   0  -3  136.49   44.00
  -6   0  -3  118.89   46.80
   6   0   3   98.29   44.20
  -7   0  -3    9.80    9.90
  -7   0  -3   -2.30   14.00
  -7   0  -3   10.60    4.40
   7   0   3    4.30    4.50
  -8   0  -3  265.77   91.19
  -8   0  -3  202.98   92.79
  -9   0  -3  295.87  120.89
  -9   0  -3  331.97  118.89
 -10   0  -3    8.70   12.00
 -10   0  -3    2.90    5.10
 -11   0  -3  123.29   43.90
 -11   0  -3   97.19   47.60
 -12   0  -3   14.40    9.20
 -12   0  -3   26.20   17.10
 -13   0  -3   12.10   20.20
 -13   0  -3   41.70   14.60
 -14   0  -3   -4.10   14.10
 -14   0  -3   13.40    7.90
 -15   0  -3   -6.60   15.20
 -15   0  -3   -7.20    6.70
 -16   0  -3   13.00   10.30
 -16   0  -3   26.60   23.10
 -17   0  -3   15.90   20.40
 -17   0  -3   27.30   12.10
  17  -1  -3   11.20   15.40
 -17   1   3   27.60   12.50
 -16   1   3   47.00   22.80
 -16   1   3    9.90   10.20
 -15   1   3    8.70    7.80
 -15   1   3    1.60   14.20
 -14   1   3   -2.80    6.50
 -14   1   3  -12.20   13.20
 -13   1   3   -1.10    6.10
 -13   1   3   -0.20   13.90
 -12   1   3   20.00   16.60
 -11   1   3    6.20   13.70
 -11   1   3   -1.30    4.80
 -10   1   3    0.40   11.70
 -10   1   3    3.20    4.60
   9  -1  -3   13.10   16.50
  -9   1   3    2.90    4.70
  -9   1   3   24.30   12.50
   8  -1  -3   -7.70   13.80
  -8   1   3    1.10    8.40
  -8   1   3   -4.10    3.20
   7  -1  -3   -2.90   12.80
  -7   1   3    9.30    9.50
  -7   1   3    5.50    4.00
   6  -1  -3    2.10    6.50
   6  -1  -3   -2.30    3.20
   6  -1  -3   -7.80   11.20
  -6   1   3    3.20    3.00
  -6   1   3   -3.70    6.80
  -6   1   3   -8.40   14.20
   5  -1  -3   -4.20    5.90
   5  -1  -3   -1.90   13.60
   5  -1  -3    5.80    3.00
  -5   1   3   -1.70   14.30
  -5   1   3   -6.60    6.50
  -5   1   3    0.40    2.60
   4  -1  -3  -14.10   12.30
   4  -1  -3    6.70    6.70
   4  -1  -3   -0.50    2.70
  -4   1   3   -4.10   14.30
  -4   1   3   -7.90    5.80
  -4   1   3    1.60    2.70
   3  -1  -3   -3.30   13.50
   3  -1  -3    3.30    5.50
   3  -1  -3   -0.40    2.70
  -3   1   3    4.60    3.00
  -3   1   3   -0.30    5.70
  -3   1   3   -5.50   14.00
   2  -1  -3   -0.20    2.60
   2  -1  -3   -0.50    4.20
   2  -1  -3  -10.10   12.90
  -2   1   3    5.20    4.20
  -2   1   3    2.00    2.80
   1  -1  -3    1.40    2.60
   1  -1  -3   -5.10    2.60
   1  -1  -3   -0.90    9.30
  -1   1   3    6.60    9.60
  -1   1   3   -0.20    2.20
  -1   1   3    0.40    2.70
   0  -1  -3    7.60    6.40
   0  -1  -3    3.60    2.60
   0   1   3   -0.40    2.70
   0   1   3   -0.70    1.40
   0   1   3   -2.20    4.40
  -1  -1  -3   -4.30    3.30
  -1  -1  -3   -4.50    1.70
  -1  -1  -3   -0.40    6.00
  -1  -1  -3   -2.40    2.70
   1   1   3    3.40    5.90
   1   1   3   -2.00    2.80
   1   1   3   -1.20    1.40
  -2  -1  -3    3.70    3.30
  -2  -1  -3   -2.00    5.30
   2   1   3   -0.10    4.70
   2   1   3    0.90    2.40
   2   1   3   -2.30    3.70
  -3  -1  -3    3.50    6.60
  -3  -1  -3    3.90    3.10
  -3  -1  -3   -0.10    3.10
   3   1   3   -0.80    5.50
   3   1   3   -0.40    2.50
   3   1   3   -7.40    3.70
  -4  -1  -3   -0.80    2.60
  -4  -1  -3   -1.40    2.90
  -4  -1  -3    5.20   10.20
  -4  -1  -3    4.90    7.60
   4   1   3   -2.50    5.60
   4   1   3    5.30    2.50
   4   1   3   -4.90    3.80
  -5  -1  -3    2.70   10.30
  -5  -1  -3    4.90    3.20
  -5  -1  -3    1.40    7.70
   5   1   3    5.30    4.30
   5   1   3   -5.40    5.20
   5   1   3   -4.90    2.30
  -6  -1  -3    3.20   11.50
  -6  -1  -3    1.40    8.60
  -6  -1  -3   -5.30    3.20
   6   1   3    0.90    3.80
  -7  -1  -3    1.00    3.50
  -7  -1  -3   -5.40    7.30
  -7  -1  -3    9.80   14.50
   7   1   3   -1.50    3.80
  -8  -1  -3    3.80    4.10
  -8  -1  -3   -0.50    8.90
  -8  -1  -3   -3.50   10.70
  -9  -1  -3  -11.80    8.20
  -9  -1  -3   -0.90    4.20
 -10  -1  -3    7.50    5.70
 -10  -1  -3    0.80   10.70
 -11  -1  -3    1.60   12.40
 -11  -1  -3    0.70    5.40
 -12  -1  -3   -9.70    5.20
 -12  -1  -3   -1.60   12.00
 -13  -1  -3   -2.70    6.00
 -13  -1  -3    7.60   15.90
 -14  -1  -3    3.10   17.00
 -14  -1  -3   14.80    8.20
 -15  -1  -3   16.10    8.20
 -15  -1  -3   -8.20   16.40
 -16  -1  -3   13.10    8.80
 -16  -1  -3   14.50   18.50
 -17  -1  -3   11.20   21.50
 -17  -1  -3   46.30   15.60
  17  -2  -3   85.39   29.90
 -17   2   3   77.29   32.60
 -17   2   3   42.00   24.10
  16  -2  -3   51.89   26.70
 -16   2   3   62.09   32.10
 -16   2   3   63.59   24.80
  15  -2  -3    4.60   10.90
 -15   2   3   -2.60   13.20
 -15   2   3   -1.60    8.40
 -14   2   3   20.90   12.20
 -14   2   3   35.20   20.60
 -13   2   3   -4.80   13.60
 -13   2   3    6.10    6.80
 -12   2   3   28.00   19.20
 -12   2   3   27.80   12.50
 -11   2   3   10.70    6.80
 -11   2   3    6.20   13.50
 -10   2   3  189.18   74.69
 -10   2   3  190.48   70.89
   9  -2  -3   24.00   19.50
  -9   2   3   20.60    9.20
  -9   2   3   18.80   13.80
   8  -2  -3   22.90   19.90
  -8   2   3   23.80   10.40
  -8   2   3   27.60   14.00
  -7   2   3  146.39   49.10
  -7   2   3  117.99   47.20
   6  -2  -3  280.57  103.69
   6  -2  -3  286.07  104.79
  -6   2   3  253.67  102.99
  -6   2   3  305.77  103.99
   5  -2  -3  553.24  210.28
   5  -2  -3  656.03  211.78
  -5   2   3  507.15  210.28
  -5   2   3  569.54  211.48
  -5   2   3  587.14  210.88
   4  -2  -3  192.98   74.79
   4  -2  -3  226.28   76.29
   4  -2  -3  178.18   74.99
  -4   2   3  194.98   74.49
  -4   2   3  203.88   74.89
  -4   2   3  211.08   76.19
   3  -2  -3   20.90    9.00
   3  -2  -3   23.50   16.90
   3  -2  -3   15.70    9.10
  -3   2   3   22.80   17.00
  -3   2   3   12.60    8.40
  -3   2   3   30.00    9.70
   2  -2  -3 1583.74  580.84
   2  -2  -3 1714.33  581.34
   2  -2  -3 1520.35  580.74
  -2   2   3 1596.04  581.24
  -2   2   3 1426.96  580.64
  -2   2   3 1615.14  580.84
   1  -2  -3  223.88   88.19
   1  -2  -3  235.98   87.39
  -1   2   3  234.68   87.39
  -1   2   3  245.98   87.99
   0  -2  -3 1868.01  711.23
   0  -2  -3 1894.71  711.13
   0  -2  -3 1936.51  711.43
   0   2   3 2113.29  711.43
   0   2   3 1809.22  711.23
  -1  -2  -3  233.38   87.49
  -1  -2  -3  231.38   87.29
  -1  -2  -3  224.38   87.19
  -1  -2  -3  242.68   87.59
   1   2   3  227.58   87.39
   1   2   3  223.48   87.09
   1   2   3  242.88   87.39
   1   2   3  255.57   87.39
  -2  -2  -3 1627.34  599.44
  -2  -2  -3 1566.44  599.84
  -2  -2  -3 1578.24  599.54
   2   2   3 1592.34  599.54
   2   2   3 1561.74  599.74
   2   2   3 1798.02  599.44
  -3  -2  -3   19.90   10.20
  -3  -2  -3   14.10    9.40
  -3  -2  -3   25.00   12.80
   3   2   3   28.10   10.80
   3   2   3   32.60   12.20
   3   2   3   35.30    9.70
  -4  -2  -3  210.88   80.09
  -4  -2  -3  207.08   81.09
  -4  -2  -3  200.58   79.89
  -4  -2  -3  242.18   80.39
   4   2   3  221.58   80.29
   4   2   3  202.18   80.89
  -5  -2  -3  596.04  229.28
  -5  -2  -3  602.44  229.08
  -5  -2  -3  652.63  229.48
  -5  -2  -3  633.94  230.28
   5   2   3  616.94  229.38
  -6  -2  -3  268.57  104.49
  -6  -2  -3  276.67  105.09
  -6  -2  -3  278.47  105.99
   6   2   3  309.37  104.89
  -7  -2  -3  161.98   46.90
  -7  -2  -3  105.99   43.20
  -7  -2  -3  108.29   42.10
  -8  -2  -3   38.20   17.10
  -8  -2  -3   27.60   12.20
  -9  -2  -3   20.20   15.40
  -9  -2  -3    2.40    4.70
  -9  -2  -3    0.10   10.60
 -10  -2  -3  182.78   56.49
 -10  -2  -3  135.99   50.19
 -10  -2  -3   87.69   57.29
 -11  -2  -3    7.30   11.90
 -11  -2  -3   -9.00    4.30
 -12  -2  -3   17.00   16.60
 -12  -2  -3   12.20    7.70
 -13  -2  -3   25.90   20.40
 -14  -2  -3   10.60   16.10
 -14  -2  -3   12.70    7.60
 -15  -2  -3    6.80    5.40
 -15  -2  -3   23.50   23.30
 -16  -2  -3   64.89   25.40
 -16  -2  -3   58.19   36.60
 -17  -2  -3   85.49   55.99
 -17  -2  -3  148.19   50.39
  17  -3  -3   11.50   15.90
 -17   3   3   -1.90    9.70
 -17   3   3    1.00   16.80
  16  -3  -3   19.20   13.00
 -16   3   3  -19.20    8.30
 -16   3   3   -5.50   15.30
  15  -3  -3   38.30   21.60
 -15   3   3   59.79   26.90
  14  -3  -3   -7.20    8.10
 -14   3   3   21.50   16.20
 -14   3   3   10.20    7.70
  13  -3  -3   10.10   10.40
 -13   3   3   -5.50    6.40
 -13   3   3   -8.40   16.80
  12  -3  -3    1.00    7.80
 -12   3   3    3.90    6.40
 -12   3   3   -8.80   11.50
  11  -3  -3   -3.10    6.50
 -11   3   3    9.10    6.10
 -11   3   3  -23.80    9.50
  10  -3  -3   12.70    7.30
 -10   3   3    6.30    5.80
 -10   3   3   -6.60    8.50
   9  -3  -3  -11.50   15.20
   9  -3  -3   -5.40    5.70
  -9   3   3    3.90    9.70
  -9   3   3   -6.20    3.70
   8  -3  -3   -6.60   16.10
   8  -3  -3   -7.60    4.40
  -8   3   3    1.20    4.30
  -8   3   3   14.80    9.40
   7  -3  -3    5.90   14.60
   7  -3  -3    2.20    5.00
  -7   3   3   -8.10    3.40
  -7   3   3   -6.90    6.00
   6  -3  -3    0.20    5.10
   6  -3  -3   32.70   16.80
   6  -3  -3    5.10    5.40
  -6   3   3    5.80    7.00
  -6   3   3    5.70    4.60
   5  -3  -3   -1.40    5.00
   5  -3  -3    2.10    4.60
   5  -3  -3  -18.60   14.20
  -5   3   3    3.50    4.20
  -5   3   3   -6.00    5.30
   4  -3  -3   -1.50   15.50
   4  -3  -3   -1.30    4.30
   4  -3  -3   -6.60    4.80
  -4   3   3   -0.80    5.30
  -4   3   3    2.70   16.30
  -4   3   3   -3.60    4.20
   3  -3  -3    7.00   15.60
   3  -3  -3   -0.10    5.30
  -3   3   3    4.30   14.70
  -3   3   3    0.70    4.80
  -3   3   3    1.70    4.00
  -3   3   3   -2.30    4.10
   2  -3  -3   -4.60    5.10
   2  -3  -3   12.70   14.80
  -2   3   3   -2.90    4.90
  -2   3   3    3.70   14.60
   1  -3  -3    4.00    5.80
   1  -3  -3    7.90   13.70
  -1   3   3    2.80   13.80
  -1   3   3    1.10    5.40
   0  -3  -3   -3.90    4.90
   0  -3  -3   -4.50   10.80
   0  -3  -3    1.20    3.70
   0   3   3    5.90    5.30
   0   3   3   -1.60    3.50
   0   3   3   -6.00   12.20
  -1  -3  -3    1.80    5.20
  -1  -3  -3    2.70    5.50
  -1  -3  -3    9.70   10.80
   1   3   3   -1.70    4.90
   1   3   3   -2.00    5.10
   1   3   3    0.00    2.70
   1   3   3  -11.40    9.70
  -2  -3  -3    1.20    3.90
  -2  -3  -3   -4.40    7.70
  -2  -3  -3    0.10    5.40
  -2  -3  -3    1.80    6.10
   2   3   3   -0.70    5.30
   2   3   3   -0.40    7.40
   2   3   3    5.30    6.40
   2   3   3   -7.00    2.50
  -3  -3  -3    4.40    6.70
  -3  -3  -3   -1.10    3.80
  -3  -3  -3    0.00    4.70
   3   3   3    1.30    5.40
   3   3   3    7.30    6.60
   3   3   3    3.60    3.00
  -4  -3  -3   -7.30    3.40
  -4  -3  -3    0.30    7.30
  -4  -3  -3    4.40    4.70
   4   3   3   -1.30    2.90
   4   3   3   -5.50    6.20
   4   3   3   -0.20    5.20
  -5  -3  -3   -2.30    3.60
  -5  -3  -3   -2.40    3.10
  -5  -3  -3   11.10    9.20
   5   3   3   -2.50    4.80
  -6  -3  -3   -5.20    2.80
  -6  -3  -3   -1.90    4.60
  -6  -3  -3   -4.10    7.00
  -7  -3  -3   -0.60    7.50
  -7  -3  -3   -3.80    2.90
  -8  -3  -3   -2.50    9.60
  -8  -3  -3   -4.90   10.80
  -8  -3  -3   -1.30    3.30
  -9  -3  -3    6.40   13.10
  -9  -3  -3   16.90   12.70
 -10  -3  -3  -12.70    7.80
 -10  -3  -3   -0.20    4.30
 -11  -3  -3    8.60   16.70
 -11  -3  -3   -3.60   13.00
 -12  -3  -3   -1.10    4.50
 -12  -3  -3    0.60   22.70
 -12  -3  -3   -4.80   12.90
 -13  -3  -3   -2.20   17.40
 -13  -3  -3    0.20    4.40
 -14  -3  -3    2.50   17.50
 -14  -3  -3    4.40    5.10
 -15  -3  -3   22.70    7.90
 -15  -3  -3  -18.30   14.60
 -16  -3  -3   25.80   10.10
 -16  -3  -3   -5.70   18.20
 -17  -3  -3   54.29   19.00
 -17  -3  -3   21.20   25.80
  16  -4  -3   -2.20   12.80
 -16   4   3   14.70   10.80
 -16   4   3   17.50   17.70
  15  -4  -3    1.80   12.60
 -15   4   3   -8.90    7.80
 -15   4   3   30.10   18.50
  14  -4  -3    1.00   11.10
 -14   4   3  -10.60    6.50
 -14   4   3   14.00   15.90
  13  -4  -3   13.70   12.20
 -13   4   3   25.20   16.90
 -13   4   3   10.00    9.00
  12  -4  -3   98.89   43.00
 -12   4   3  116.89   46.30
 -12   4   3  111.09   41.70
  11  -4  -3    6.20    8.80
 -11   4   3    4.80   15.20
 -11   4   3    2.60   10.80
  10  -4  -3  163.38   68.29
 -10   4   3  221.78   71.99
 -10   4   3  183.68   67.99
   9  -4  -3  125.19   55.69
  -9   4   3  198.08   59.39
  -9   4   3  152.28   55.49
   8  -4  -3   94.29   38.50
   8  -4  -3   83.29   31.20
  -8   4   3   86.99   32.90
  -8   4   3   65.69   30.30
   7  -4  -3  145.19   50.49
   7  -4  -3  217.28   58.19
  -7   4   3  111.29   49.60
  -7   4   3  117.29   50.09
   6  -4  -3  155.88   54.39
  -6   4   3  131.29   51.49
  -6   4   3  132.09   51.89
   5  -4  -3  230.28   58.89
   5  -4  -3  149.19   51.89
  -5   4   3  128.59   51.79
  -5   4   3  114.99   51.49
   4  -4  -3  787.62  293.87
   4  -4  -3  729.63  292.77
  -4   4   3  784.52  292.67
  -4   4   3  794.82  292.67
  -4   4   3  857.41  292.77
   3  -4  -3  513.15  186.58
   3  -4  -3  490.55  188.08
  -3   4   3  451.35  187.48
  -3   4   3  549.45  186.58
   2  -4  -3  120.59   46.00
   2  -4  -3  118.89   48.70
  -2   4   3  166.08   50.69
  -2   4   3  109.39   45.80
   1  -4  -3   37.80   15.90
   1  -4  -3   28.60   20.50
  -1   4   3   38.50   15.90
  -1   4   3   44.80   22.10
   0  -4  -3  471.65  170.28
   0  -4  -3  439.06  169.48
   0  -4  -3  445.66  169.78
   0   4   3  469.65  169.48
   0   4   3  437.26  169.78
   0   4   3  485.35  170.18
  -1  -4  -3   47.50   15.40
  -1  -4  -3   31.90   14.60
  -1  -4  -3   42.40   18.10
   1   4   3   40.50   14.80
   1   4   3   30.60   14.50
   1   4   3   28.40   13.40
  -2  -4  -3  127.69   43.60
  -2  -4  -3  108.39   43.00
  -2  -4  -3  105.89   43.70
  -2  -4  -3  121.49   43.50
   2   4   3  104.09   43.60
   2   4   3  105.79   42.80
   2   4   3  125.69   43.40
   2   4   3  118.79   43.40
  -3  -4  -3  489.75  187.08
  -3  -4  -3  508.35  187.78
  -3  -4  -3  506.75  187.28
   3   4   3  536.95  187.08
   3   4   3  489.95  187.38
   3   4   3  495.65  187.68
  -4  -4  -3  717.93  285.27
  -4  -4  -3  827.72  286.27
  -4  -4  -3  784.32  285.47
  -5  -4  -3  221.78   56.79
  -5  -4  -3  124.69   51.89
  -5  -4  -3  136.49   52.19
  -6  -4  -3  114.39   50.09
  -6  -4  -3  148.99   50.49
  -6  -4  -3  165.78   53.69
  -7  -4  -3  159.58   42.20
  -7  -4  -3   82.19   36.20
  -7  -4  -3  100.09   36.50
  -8  -4  -3   75.79   35.00
  -8  -4  -3   81.49   30.70
  -9  -4  -3   97.79   40.60
  -9  -4  -3  171.78   48.30
 -10  -4  -3  189.58   72.19
 -10  -4  -3  209.88   77.49
 -11  -4  -3    4.50    5.90
 -11  -4  -3    4.90   15.30
 -12  -4  -3   74.29   36.90
 -12  -4  -3   79.49   30.60
 -13  -4  -3   11.80   18.00
 -13  -4  -3    7.20    6.00
 -14  -4  -3    2.20   16.80
 -14  -4  -3   21.30    9.30
 -15  -4  -3   14.50   17.10
 -15  -4  -3    5.30    7.50
 -16  -4  -3   60.59   33.80
  16  -5  -3    4.60   14.00
 -16   5   3    3.40   19.80
 -16   5   3  -20.40   11.60
  15  -5  -3   -7.40   12.20
 -15   5   3  -15.20    8.20
 -15   5   3   16.60   18.50
 -14   5   3  -11.20    8.00
 -14   5   3   10.60   15.50
  13  -5  -3    2.30   10.20
 -13   5   3   12.00   14.00
 -13   5   3   -2.90    7.50
  12  -5  -3   -3.20    9.70
 -12   5   3   14.80    8.20
 -12   5   3   19.10   15.30
  11  -5  -3    5.70    8.70
 -11   5   3   17.10   13.70
 -11   5   3   -4.30    5.50
  10  -5  -3   -6.00    7.10
 -10   5   3   -9.90    5.50
 -10   5   3   10.30   11.60
   9  -5  -3   -2.00    6.30
  -9   5   3    4.80    8.30
  -9   5   3    3.70    6.10
   8  -5  -3    1.50    7.30
   8  -5  -3   -8.00   16.30
  -8   5   3   -9.60    4.90
  -8   5   3    7.90    9.30
   7  -5  -3  -16.20   15.30
   7  -5  -3   -6.70    5.60
  -7   5   3   -3.10    6.90
  -7   5   3   -3.40    5.20
   6  -5  -3   14.70   18.80
   6  -5  -3    6.30    6.50
  -6   5   3   -1.40    6.10
  -6   5   3    1.70    5.40
   5  -5  -3   -9.00    5.20
   5  -5  -3  -15.40   13.30
  -5   5   3   -4.00    4.80
  -5   5   3    3.10    5.10
   4  -5  -3   -5.00    5.10
   4  -5  -3  -15.50   13.10
  -4   5   3   -6.00    4.50
   3  -5  -3   10.20    6.80
   3  -5  -3  -15.70   14.40
  -3   5   3   -0.30    5.70
   2  -5  -3    2.70   21.30
   2  -5  -3   -7.70    6.10
  -2   5   3   15.70   18.20
  -2   5   3   -8.90    4.50
   1  -5  -3   -5.60   12.60
   1  -5  -3   -3.30    5.80
  -1   5   3    3.20   14.80
  -1   5   3   -1.70    5.50
   0  -5  -3    1.30    6.70
   0  -5  -3    2.70    4.70
   0  -5  -3   11.20   13.50
   0   5   3   -0.80    4.40
   0   5   3   -6.30    5.20
   0   5   3  -35.50   16.50
  -1  -5  -3   -6.40    5.60
  -1  -5  -3   -9.20    4.90
  -1  -5  -3    2.30   11.20
   1   5   3   -2.90    6.00
   1   5   3   -1.80   12.30
   1   5   3    0.40    5.10
   1   5   3   -7.90    3.30
  -2  -5  -3   -1.70    6.70
  -2  -5  -3   -3.40    9.80
  -2  -5  -3    3.80    6.00
   2   5   3   11.30   10.30
   2   5   3    1.80    6.40
  -3  -5  -3    7.70    6.40
  -3  -5  -3   -2.40    7.20
  -3  -5  -3    4.70    4.70
   3   5   3    2.00    6.70
  -4  -5  -3   -5.80    8.00
  -4  -5  -3    0.50    5.40
  -4  -5  -3   -9.50    3.80
  -5  -5  -3   -1.70    5.20
  -5  -5  -3   10.80    9.20
  -5  -5  -3    1.30    4.30
  -6  -5  -3    5.40    4.40
  -6  -5  -3  -11.50    7.50
  -6  -5  -3   -1.70    5.30
  -7  -5  -3    1.50    4.70
  -7  -5  -3   -7.90    3.80
  -7  -5  -3    9.00   10.90
  -8  -5  -3   -4.50    4.40
  -8  -5  -3    3.60   10.00
  -8  -5  -3   -0.60    4.90
  -9  -5  -3   -7.30    4.40
  -9  -5  -3    0.00   12.20
 -10  -5  -3   -1.70   13.60
 -10  -5  -3   -8.90    4.50
 -11  -5  -3    8.30    6.60
 -11  -5  -3    2.20   13.40
 -12  -5  -3   15.00   17.90
 -12  -5  -3   -1.30    4.50
 -13  -5  -3   -3.80   14.70
 -13  -5  -3   -3.40    5.10
 -14  -5  -3   14.70   20.10
 -14  -5  -3   -3.00    6.00
 -15  -5  -3    4.10    8.30
 -15  -5  -3   41.60   24.10
 -16  -5  -3   24.00   10.10
 -16  -5  -3   -3.80   19.70
  16  -6  -3   68.79   29.50
 -16   6   3   91.89   30.80
 -16   6   3   39.20   25.50
  15  -6  -3   22.40   14.60
 -15   6   3    3.70   15.40
 -15   6   3   12.60   11.40
  14  -6  -3   13.70   14.20
 -14   6   3   66.69   23.80
 -14   6   3    9.90   11.50
  13  -6  -3   -0.90   11.40
 -13   6   3   17.00    9.70
 -13   6   3   14.40   16.20
  12  -6  -3    5.60   11.70
 -12   6   3   20.90   14.70
 -12   6   3    6.70    7.90
  11  -6  -3   -0.10    8.50
 -11   6   3    2.40    9.90
 -11   6   3    5.20    6.70
  10  -6  -3   79.29   23.30
 -10   6   3   65.99   23.90
 -10   6   3   27.30   20.00
   9  -6  -3  178.48   65.19
  -9   6   3  163.68   65.99
  -9   6   3  174.48   65.49
   8  -6  -3  119.09   52.39
  -8   6   3  155.98   53.29
  -8   6   3  131.89   51.99
   7  -6  -3   86.69   39.10
   7  -6  -3  173.48   49.70
  -7   6   3   98.29   39.20
  -7   6   3   92.29   38.70
   6  -6  -3   29.20   14.00
   6  -6  -3   23.70   22.30
  -6   6   3   29.30   13.10
  -6   6   3   29.30   13.10
   5  -6  -3    4.50    6.80
   5  -6  -3   18.30   18.30
  -5   6   3    1.10    6.20
   4  -6  -3  475.25  184.38
   4  -6  -3  522.55  185.88
   3  -6  -3  134.29   44.10
   3  -6  -3   82.79   38.60
   2  -6  -3  117.49   45.20
   2  -6  -3   98.29   41.10
   1  -6  -3  192.68   64.69
   1  -6  -3  123.89   52.59
   0  -6  -3  137.59   53.09
   0  -6  -3  157.68   54.49
   0  -6  -3  140.39   52.59
   0   6   3  147.89   52.59
   0   6   3  115.19   53.89
  -1  -6  -3   91.99   37.20
  -1  -6  -3  102.79   38.00
   1   6   3  100.29   37.20
  -2  -6  -3  106.89   43.60
  -2  -6  -3  102.09   43.90
   2   6   3  113.39   43.20
   2   6   3  128.49   44.00
  -3  -6  -3   63.99   38.00
  -3  -6  -3   92.29   37.70
   3   6   3  128.09   38.60
  -4  -6  -3  514.85  183.88
  -4  -6  -3  522.85  183.18
  -4  -6  -3  451.65  182.78
  -5  -6  -3    3.10    9.40
  -5  -6  -3   -2.20    5.40
  -5  -6  -3    3.10    4.90
  -6  -6  -3   36.80   12.90
  -6  -6  -3   23.90   13.50
  -6  -6  -3   25.80   16.40
  -7  -6  -3   86.29   34.30
  -7  -6  -3  106.19   38.40
  -7  -6  -3   80.79   33.60
  -8  -6  -3  111.09   41.10
  -8  -6  -3  127.99   46.20
  -8  -6  -3   96.69   41.00
  -9  -6  -3  228.28   69.69
  -9  -6  -3  146.59   62.89
  -9  -6  -3  178.08   63.29
 -10  -6  -3   64.79   28.00
 -10  -6  -3   96.69   36.00
 -11  -6  -3    1.40   14.50
 -11  -6  -3    7.90    6.00
 -12  -6  -3    6.40   15.90
 -12  -6  -3    4.80    5.90
 -13  -6  -3   35.00   13.70
 -13  -6  -3   14.30   21.00
 -14  -6  -3   98.59   26.00
 -14  -6  -3   15.90   29.10
 -15  -6  -3   41.50   25.90
 -15  -6  -3   26.00   13.60
 -16  -6  -3  100.79   36.50
 -16  -6  -3   70.79   44.10
  15  -7  -3   -3.20   13.70
 -15   7   3  -10.80   15.40
  14  -7  -3    2.40   12.00
 -14   7   3   23.90   14.50
 -14   7   3   -7.80    8.30
  13  -7  -3  -10.00   10.20
 -13   7   3   10.00    8.70
 -13   7   3  -21.20   11.50
  12  -7  -3   -3.70    9.90
 -12   7   3    8.50   11.80
 -12   7   3   -4.10    6.90
  11  -7  -3   14.80   10.90
 -11   7   3    1.80    7.30
 -11   7   3  -14.80    8.30
  10  -7  -3    3.30    9.00
 -10   7   3  -27.70    8.30
 -10   7   3   -8.60    6.10
   9  -7  -3    0.70    9.20
  -9   7   3  -12.70   10.40
   8  -7  -3  -13.70    7.00
  -8   7   3    0.40    7.40
  -8   7   3    5.00    6.40
   7  -7  -3   -2.20    8.10
  -7   7   3    4.40    6.70
  -7   7   3   -8.40    6.20
   6  -7  -3   -5.70   16.10
   6  -7  -3    9.80    8.30
  -6   7   3    0.40    5.80
   5  -7  -3    9.20    8.10
   5  -7  -3    9.70   18.10
  -5   7   3  -13.00    4.60
   4  -7  -3    5.60    7.80
   4  -7  -3    0.90   15.50
   3  -7  -3    3.50    7.20
   3  -7  -3   -4.40   15.20
   2  -7  -3  -11.60    6.30
   2  -7  -3   -2.60   16.30
   1  -7  -3   -5.60   15.60
   1  -7  -3   -5.90    6.20
   0  -7  -3   -3.30   14.40
   0  -7  -3   -4.50    6.50
   0  -7  -3    0.40    4.80
   0   7   3   -2.80    4.50
  -1  -7  -3   -0.70    5.60
  -1  -7  -3    5.50    6.30
   1   7   3   -5.10   12.40
  -2  -7  -3   -4.50    6.60
  -2  -7  -3    4.40    6.80
   2   7   3    6.40   12.60
   2   7   3   -4.70    5.10
  -3  -7  -3    0.60    6.30
   3   7   3    0.80    9.50
  -4  -7  -3    2.30    8.00
  -4  -7  -3   -2.40    6.20
  -5  -7  -3  -16.60    6.60
  -5  -7  -3    0.30    5.70
  -5  -7  -3    4.90    5.00
  -6  -7  -3    4.70    6.20
  -6  -7  -3   -6.70    4.60
  -6  -7  -3   -2.10    9.70
  -7  -7  -3   -8.40   10.00
  -7  -7  -3   -4.90    5.00
  -7  -7  -3   -3.20    5.50
  -8  -7  -3    1.30   12.00
  -8  -7  -3    4.00    5.90
  -8  -7  -3   -5.70    4.80
  -9  -7  -3  -10.20   11.60
  -9  -7  -3   18.60    7.90
  -9  -7  -3    0.50    5.80
 -10  -7  -3   -2.50    5.70
 -10  -7  -3   -9.80   12.00
 -11  -7  -3   11.10    8.50
 -11  -7  -3   24.80   18.40
 -12  -7  -3   17.60   17.50
 -12  -7  -3  -10.80    5.30
 -13  -7  -3    4.40    7.00
 -13  -7  -3  -12.40   15.10
 -14  -7  -3   -8.40   14.90
 -14  -7  -3   20.10    8.50
 -15  -7  -3   24.30   11.50
 -15  -7  -3  -15.50   14.60
  15  -8  -3  128.89   32.70
 -15   8   3   66.79   29.70
 -15   8   3   38.10   25.20
  14  -8  -3   23.20   15.10
 -14   8   3   -2.70   11.00
 -14   8   3   36.90   17.30
  13  -8  -3   -1.10   10.30
 -13   8   3    4.60    9.20
 -13   8   3   19.80   12.70
  12  -8  -3   34.80   18.40
 -12   8   3   61.69   19.40
 -12   8   3   16.00   15.60
  11  -8  -3   -8.30    9.00
 -11   8   3    8.80   11.40
 -11   8   3    6.70    8.20
  10  -8  -3   75.49   27.60
 -10   8   3   41.90   25.20
 -10   8   3   72.79   27.40
   9  -8  -3   74.09   35.40
  -9   8   3   54.79   34.00
  -9   8   3  129.89   35.60
   8  -8  -3   49.80   24.30
  -8   8   3   42.00   23.50
  -8   8   3   63.79   22.90
   7  -8  -3   77.49   32.00
  -7   8   3   77.09   30.80
   6  -8  -3  130.99   45.20
  -6   8   3  101.39   43.80
   5  -8  -3   44.00   15.20
  -5   8   3   17.70   12.80
   4  -8  -3   16.60   11.30
   3  -8  -3   42.80   19.40
   2  -8  -3   42.90   19.60
   1  -8  -3  163.78   62.19
   0  -8  -3  144.59   54.09
   0  -8  -3  145.99   54.89
   0   8   3  142.09   54.09
  -1  -8  -3  143.19   57.89
  -1  -8  -3  187.38   59.59
   1   8   3  151.18   57.79
  -2  -8  -3   49.70   22.00
  -2  -8  -3   41.40   21.90
   2   8   3   69.79   25.30
   2   8   3   45.40   21.90
  -3  -8  -3   29.60   17.50
  -3  -8  -3   44.20   18.50
   3   8   3   46.90   20.50
  -4  -8  -3   64.59   17.30
  -4  -8  -3   37.20   17.10
   4   8   3   20.10   15.40
  -5  -8  -3   19.90   15.00
  -5  -8  -3   29.70   13.10
  -6  -8  -3  134.09   60.49
  -6  -8  -3  167.88   58.99
  -7  -8  -3   84.09   30.60
  -7  -8  -3   46.10   24.50
  -7  -8  -3   74.69   26.10
  -8  -8  -3   17.10   20.00
  -8  -8  -3   40.20   16.70
  -8  -8  -3   50.79   18.30
  -9  -8  -3  101.09   38.80
  -9  -8  -3   93.39   33.50
  -9  -8  -3   68.89   32.40
 -10  -8  -3   43.00   34.30
 -10  -8  -3   98.79   31.50
 -10  -8  -3   76.29   30.20
 -11  -8  -3   11.80    7.90
 -11  -8  -3   -9.80   14.40
 -12  -8  -3   12.80    8.00
 -12  -8  -3   -1.40   17.10
 -13  -8  -3   16.60   19.10
 -13  -8  -3   -5.50    6.50
 -14  -8  -3   33.60   33.50
 -14  -8  -3   10.60    9.80
 -15  -8  -3  105.19   39.50
 -15  -8  -3   88.49   47.40
  14  -9  -3   -5.80   12.10
 -14   9   3    6.40   12.20
 -14   9   3    3.50    8.90
  13  -9  -3    9.00   14.20
 -13   9   3   -8.80    7.00
  12  -9  -3   10.90   12.00
 -12   9   3    1.20    8.40
  11  -9  -3   10.60   12.30
 -11   9   3   14.40    9.70
 -11   9   3    2.20   10.70
  10  -9  -3   -8.60    9.50
 -10   9   3    7.10    7.00
 -10   9   3   -7.10    8.20
   9  -9  -3    5.10   11.00
  -9   9   3    2.30    7.20
   8  -9  -3   17.10   10.80
  -8   9   3  -14.60    6.70
   7  -9  -3   19.80   11.20
  -7   9   3   -0.10    7.00
   6  -9  -3   -9.00    8.00
  -6   9   3    0.30    6.80
   5  -9  -3    9.30    9.40
  -5   9   3   -4.70    6.40
   4  -9  -3   -5.50    8.10
   3  -9  -3    2.70    8.70
   2  -9  -3    5.80    9.10
   1  -9  -3   -5.30    8.20
   0  -9  -3   -2.70    8.80
   0  -9  -3    6.60    6.30
   0   9   3   11.90    6.30
  -1  -9  -3    3.80    8.90
  -1  -9  -3   -5.50    6.00
   1   9   3    6.00    6.50
  -2  -9  -3    0.50    8.40
  -2  -9  -3   -0.40    7.90
  -3  -9  -3    5.80    7.70
  -3  -9  -3   -1.60    8.60
   3   9   3    5.50   14.00
  -4  -9  -3   -1.10    9.50
  -4  -9  -3   -1.40    8.10
   4   9   3  -11.20   10.00
  -5  -9  -3    2.30    6.80
  -5  -9  -3    5.10   10.90
  -6  -9  -3    7.50    8.80
  -6  -9  -3    6.70   12.50
  -7  -9  -3   -8.10    6.60
  -7  -9  -3   -9.20   11.70
  -8  -9  -3   -8.70    5.70
  -8  -9  -3  -10.10   10.80
  -9  -9  -3   -4.60   12.90
  -9  -9  -3    4.80    7.00
  -9  -9  -3   -5.70    6.90
 -10  -9  -3    7.00    7.20
 -10  -9  -3   25.10   17.90
 -10  -9  -3    3.00    6.90
 -11  -9  -3    3.10   16.70
 -11  -9  -3   -9.60    5.90
 -12  -9  -3    7.30    7.80
 -12  -9  -3   25.20   20.30
 -13  -9  -3   10.80    7.50
 -13  -9  -3   -0.10   15.70
 -14  -9  -3  -18.30   16.00
 -14  -9  -3   10.50    8.40
  14 -10  -3    6.50   16.30
 -14  10   3   -5.60    8.80
  13 -10  -3   20.60   14.90
 -13  10   3    3.50    9.90
  12 -10  -3   39.30   22.80
 -12  10   3   51.59   21.00
  11 -10  -3   12.60   13.80
 -11  10   3   24.30   13.00
  10 -10  -3   35.20   19.90
 -10  10   3   -0.40    9.00
   9 -10  -3   25.00   15.50
  -9  10   3   20.10   12.90
   8 -10  -3   72.29   20.20
  -8  10   3   18.00   16.40
   7 -10  -3   30.50   17.40
  -7  10   3   36.10   16.10
   6 -10  -3  118.39   38.70
  -6  10   3   76.99   35.90
   5 -10  -3   47.40   22.40
   4 -10  -3    6.00   11.00
   3 -10  -3   40.10   18.90
   2 -10  -3   67.19   29.20
   1 -10  -3  149.79   58.79
   0 -10  -3   33.50   14.60
   0 -10  -3   17.40   11.00
  -1 -10  -3  147.19   50.19
  -1 -10  -3  126.19   50.39
   1  10   3  118.19   48.80
  -2 -10  -3   64.69   22.60
  -2 -10  -3   33.70   21.20
  -3 -10  -3    5.40   11.50
  -3 -10  -3    6.30    9.40
   3  10   3   43.70   21.30
  -4 -10  -3    9.80   13.60
  -4 -10  -3   26.00   12.20
  -5 -10  -3   76.59   30.50
  -5 -10  -3   59.19   27.60
  -6 -10  -3  130.59   50.99
  -6 -10  -3  115.79   47.80
  -7 -10  -3   60.79   28.00
  -7 -10  -3   52.59   24.00
  -8 -10  -3   45.50   20.60
  -8 -10  -3   42.90   23.40
  -9 -10  -3   42.60   23.20
  -9 -10  -3   27.20   15.20
 -10 -10  -3   32.00   15.80
 -10 -10  -3   36.90   22.80
 -11 -10  -3   16.80   18.50
 -12 -10  -3   78.79   33.10
 -12 -10  -3   46.90   22.20
 -13 -10  -3    1.20   21.50
 -13 -10  -3   20.50   18.00
 -14 -10  -3   -1.10   18.70
 -14 -10  -3   29.80   11.90
  13 -11  -3   25.40   17.40
 -13  11   3   -7.40    8.50
  12 -11  -3   17.50   15.20
 -12  11   3  -12.30    9.40
  11 -11  -3    5.00   12.70
 -11  11   3    7.40    9.60
  10 -11  -3   11.90   14.50
 -10  11   3   14.90   11.60
   9 -11  -3   -7.10   11.70
  -9  11   3   12.00   10.00
  -8  11   3   -0.30    8.50
   7 -11  -3   12.50   12.60
  -7  11   3  -12.30    6.70
   6 -11  -3    8.70   12.00
  -6  11   3   -2.80    7.10
   5 -11  -3    6.60   12.00
   4 -11  -3   13.40   13.20
   3 -11  -3   20.10   13.00
   2 -11  -3    3.00   10.30
   1 -11  -3   -6.90    9.60
   0 -11  -3   -1.60    5.80
   0 -11  -3   -5.00   11.10
   0  11   3    5.70    6.30
  -1 -11  -3    2.10    7.40
  -1 -11  -3  -13.00    9.20
  -2 -11  -3   11.40    9.70
  -2 -11  -3  -12.10    8.20
  -3 -11  -3    9.60    9.10
  -4 -11  -3    7.70    9.90
  -4 -11  -3   11.50   12.30
   4  11   3    3.50   14.20
  -5 -11  -3   -6.00   11.70
  -5 -11  -3   10.70   10.20
  -6 -11  -3    6.30   13.80
  -6 -11  -3   10.80   10.20
  -7 -11  -3    3.90    8.50
  -8 -11  -3   -1.60   14.80
  -9 -11  -3   -6.80   15.00
  -9 -11  -3    8.50    7.90
 -10 -11  -3    4.20    8.30
 -10 -11  -3    8.50   17.10
 -11 -11  -3  -11.90   14.70
 -12 -11  -3   -9.90   14.90
 -13 -11  -3   10.30   22.10
  12 -12  -3  107.79   33.40
 -12  12   3   47.50   26.30
  11 -12  -3   44.90   22.40
 -11  12   3   36.00   18.80
  10 -12  -3   37.40   19.10
 -10  12   3   27.90   16.40
   9 -12  -3   30.50   15.30
  -9  12   3  -10.40    7.80
   8 -12  -3   65.29   20.50
  -8  12   3   12.90   14.60
   7 -12  -3   54.09   22.50
  -7  12   3   34.60   18.60
   6 -12  -3   33.00   17.60
  -6  12   3   21.60   13.30
   5 -12  -3   -2.90   12.10
   4 -12  -3   60.09   27.90
   3 -12  -3   -4.90   10.40
   2 -12  -3   37.40   20.00
   1 -12  -3   19.80   15.10
   0 -12  -3    4.60   11.90
   0 -12  -3    4.30    7.20
   0  12   3   11.20    7.90
  -1 -12  -3    5.80   11.80
  -2 -12  -3   62.39   24.90
  -2 -12  -3   44.60   24.40
  -3 -12  -3   -1.00   10.40
  -3 -12  -3   36.50   14.70
  -4 -12  -3   81.59   34.20
  -4 -12  -3   74.99   33.20
  -5 -12  -3  -13.90   12.60
  -5 -12  -3   13.40   10.60
  -6 -12  -3   48.00   21.30
  -6 -12  -3   40.20   24.30
  -7 -12  -3   62.19   28.40
  -7 -12  -3   45.00   22.30
  -8 -12  -3   86.69   38.60
  -8 -12  -3   79.09   33.90
  -9 -12  -3  -19.50   14.90
  -9 -12  -3  -18.40    6.40
 -10 -12  -3   17.10   20.30
 -10 -12  -3   24.70   12.50
 -11 -12  -3   64.89   34.20
 -12 -12  -3   54.89   31.50
  11 -13  -3   42.30   18.90
 -11  13   3   19.40   14.00
  10 -13  -3   23.30   16.90
 -10  13   3   -5.50    8.20
   9 -13  -3    3.50   13.60
  -9  13   3   -3.30    9.20
   8 -13  -3   -1.10   12.50
  -8  13   3   -7.10    9.20
   7 -13  -3   16.90   13.50
  -7  13   3   -7.90    7.10
   6 -13  -3   -7.10   12.00
  -6  13   3   10.60   10.50
   5 -13  -3   21.60   16.30
   4 -13  -3  -21.50   10.10
   3 -13  -3   38.30   20.20
   2 -13  -3    6.60   13.70
   1 -13  -3   12.00   13.00
   0 -13  -3    9.00   12.10
  -1 -13  -3  -10.00   10.10
  -1 -13  -3   26.20   11.20
  -2 -13  -3   -0.10   11.50
  -2 -13  -3   19.90   11.90
  -3 -13  -3   -5.10   10.80
  -3 -13  -3   32.60   15.10
  -4 -13  -3   10.40   11.40
  -4 -13  -3    0.70   11.60
  -5 -13  -3    5.20   11.00
  -5 -13  -3  -21.00   13.00
  -6 -13  -3    9.90   18.90
  -6 -13  -3   -2.70    7.90
  -7 -13  -3   22.70   14.60
  -7 -13  -3   20.00   18.40
  -8 -13  -3   -0.30   15.40
  -8 -13  -3   14.90   11.30
  -9 -13  -3    4.50    7.70
  -9 -13  -3   28.50   20.10
 -10 -13  -3    6.30   16.00
 -10 -13  -3   -5.10    6.20
 -11 -13  -3   -1.00    7.00
  10 -14  -3   20.80   16.90
 -10  14   3    2.40   10.70
   9 -14  -3   15.60   17.40
  -9  14   3   24.50   13.60
   8 -14  -3   22.70   17.00
  -8  14   3    4.70   11.50
   7 -14  -3   13.50   13.90
  -7  14   3    1.60    9.60
   6 -14  -3   -2.30   12.90
  -6  14   3   12.50   10.90
   5 -14  -3   41.90   21.20
  -5  14   3   26.30   17.70
   4 -14  -3   36.90   21.30
   3 -14  -3   21.10   17.00
   2 -14  -3   -7.60   12.00
   1 -14  -3    9.60   12.20
   0 -14  -3   24.60   17.40
  -1 -14  -3   11.50   10.00
  -1 -14  -3   11.20   14.80
  -2 -14  -3   25.10   14.90
  -2 -14  -3    7.10   12.10
  -3 -14  -3    0.00   13.40
  -3 -14  -3   15.10   13.10
  -4 -14  -3   15.30   17.80
  -4 -14  -3   60.89   22.80
  -5 -14  -3   59.09   24.70
  -5 -14  -3   30.40   20.60
  -6 -14  -3    0.40   10.40
  -6 -14  -3   11.00   14.50
  -7 -14  -3   14.70   11.70
  -7 -14  -3    3.70   17.10
  -8 -14  -3   11.90   17.20
  -9 -14  -3   10.90   21.50
  -9 -14  -3   25.60   13.10
 -10 -14  -3   30.20   20.70
 -10 -14  -3   20.20   13.80
   9 -15  -3   21.50   20.20
   8 -15  -3    3.00   13.90
  -8  15   3    3.40    9.80
   7 -15  -3   -3.00   13.70
  -7  15   3   20.10   11.70
   6 -15  -3  -14.00   11.20
  -6  15   3   -4.00    9.00
   5 -15  -3   43.50   20.80
  -5  15   3   12.90   25.80
   4 -15  -3  -11.90   12.60
   3 -15  -3    3.50   12.60
   2 -15  -3    2.40   13.90
   1 -15  -3    7.10   12.10
   0 -15  -3    1.10   12.40
  -1 -15  -3  -12.10   11.70
  -2 -15  -3    9.30   12.00
  -2 -15  -3   -2.30   10.60
  -3 -15  -3   30.10   15.10
  -3 -15  -3   -1.30   12.10
  -4 -15  -3    8.90   15.90
  -4 -15  -3   22.40   14.40
  -5 -15  -3    9.40   11.10
  -5 -15  -3    1.90   16.20
  -6 -15  -3  -18.70   14.60
  -6 -15  -3   12.20   15.80
  -7 -15  -3   20.50   19.20
  -7 -15  -3    1.60   12.00
  -8 -15  -3   -7.10   10.80
  -8 -15  -3   15.80   17.80
  -9 -15  -3   23.80   22.30
   7 -16  -3   18.60   19.00
  -7  16   3   -3.90    9.80
   6 -16  -3   -4.80   15.00
  -6  16   3   -5.00   11.20
   5 -16  -3    9.10   13.60
  -5  16   3    2.20   11.10
   4 -16  -3   62.59   31.30
   3 -16  -3    8.50   16.80
   2 -16  -3   -2.00   14.20
   1 -16  -3   54.29   28.10
   0 -16  -3   13.00   14.20
  -1 -16  -3   50.09   25.50
  -2 -16  -3  -11.80   13.00
  -2 -16  -3   -5.30   12.70
  -3 -16  -3   62.39   29.90
  -4 -16  -3   -8.80   14.40
  -4 -16  -3  -21.10    8.90
  -5 -16  -3   15.60   13.90
  -5 -16  -3   20.10   19.90
  -6 -16  -3   28.80   22.50
  -6 -16  -3  -14.90   11.90
  -7 -16  -3   12.20   19.60
  -7 -16  -3    2.90   10.10
   4 -17  -3   29.70   23.60
   3 -17  -3   -3.60   13.00
   2 -17  -3   -7.10   13.80
   1 -17  -3   30.30   19.60
   0 -17  -3   -9.40   13.20
  -1 -17  -3  -29.00    9.60
  -2 -17  -3  -13.90   11.20
  -3 -17  -3   -5.00   10.00
  -4 -17  -3  -17.80   20.20
  -4 -17  -3    7.40   11.80
  -4 -17   4    9.60   12.30
  -4 -17   4    6.80   19.90
  -3 -17   4   17.10   17.90
  -2 -17   4   -5.30   12.80
  -1 -17   4   11.40   17.00
   0 -17   4   -5.20   11.90
   3 -17   4   -5.00   14.00
  -4  17  -4   21.00   11.60
   4 -17   4  -13.00   13.70
  -7 -16   4   13.10   12.60
  -7 -16   4    4.70   19.40
  -6 -16   4   25.80   21.10
  -6 -16   4   10.80   13.10
  -5 -16   4   12.70   19.90
  -5 -16   4    9.90   13.50
  -4 -16   4   29.00   16.70
  -4 -16   4   -2.60   13.00
  -3 -16   4   44.20   19.30
  -3 -16   4   -1.40   16.00
  -2 -16   4   39.50   17.60
  -2 -16   4    1.20   12.30
  -1 -16   4   47.20   24.00
   0 -16   4  121.79   50.39
   1 -16   4    8.50   12.80
   2 -16   4   19.60   16.40
   3 -16   4   26.10   18.20
  -4  16  -4  -16.40    9.10
   4 -16   4   -4.10   13.10
  -5  16  -4  -12.20   10.10
   5 -16   4   33.10   20.00
  -6  16  -4   -4.10   10.00
   6 -16   4    9.10   13.50
   7 -16   4    3.70   14.90
  -8 -15   4   34.50   18.70
  -8 -15   4   -3.70    9.20
  -7 -15   4    1.30    8.40
  -7 -15   4   19.20   18.20
  -6 -15   4   11.60   16.60
  -5 -15   4  -10.10    9.00
  -5 -15   4   12.90   16.90
  -4 -15   4   -8.60   14.30
  -4 -15   4   -3.20   10.70
  -3 -15   4   25.30   15.50
  -3 -15   4   11.00   15.30
  -2 -15   4   10.70   12.70
  -2 -15   4   -2.00   10.20
  -1 -15   4   15.40   12.60
   0 -15   4    1.20   11.70
   1 -15   4   17.00   15.00
   2 -15   4   27.40   15.90
   3 -15   4   -2.00   14.70
  -4  15  -4   -8.30    9.50
   4 -15   4   -6.50   12.00
   5 -15   4   -3.90   12.90
  -6  15  -4   37.10   15.30
   6 -15   4   12.80   15.60
  -7  15  -4    1.10   10.80
   7 -15   4   26.20   14.70
  -8  15  -4   -4.70   10.50
   8 -15   4   -4.20   14.60
  -9 -14   4   11.40   18.40
  -9 -14   4   12.10   11.40
  -8 -14   4    8.60   15.00
  -8 -14   4    7.30   17.50
  -7 -14   4    4.40   18.30
  -7 -14   4   16.10   11.40
  -6 -14   4   27.10   19.70
  -6 -14   4   60.59   26.10
  -5 -14   4   38.30   17.00
  -5 -14   4    2.80   12.40
  -4 -14   4   10.00   10.40
  -4 -14   4  -27.40   10.50
  -3 -14   4    9.00   14.10
  -3 -14   4   26.20   16.10
  -2 -14   4   27.40   17.20
  -2 -14   4   18.30   15.80
  -1 -14   4   60.49   24.90
  -1 -14   4   45.80   25.10
   0 -14   4   -3.70   10.80
   1 -14   4   16.40   14.20
   2 -14   4   43.10   22.50
   3 -14   4   43.00   22.70
  -4  14  -4    3.30   10.40
   4 -14   4    5.80   12.10
  -5  14  -4   18.00   12.20
   5 -14   4   12.10   13.50
  -6  14  -4   24.90   15.50
   6 -14   4   36.30   20.30
  -7  14  -4   13.80   11.10
   7 -14   4    4.00   16.10
  -8  14  -4    4.60   10.10
   8 -14   4    0.20   14.20
  -9  14  -4   15.30   12.70
   9 -14   4   11.90   14.20
 -10  14  -4   23.70   14.60
  10 -14   4   29.20   20.20
 -11 -13   4   17.50   22.50
 -10 -13   4  -15.80   15.70
  -9 -13   4    6.00    8.50
  -9 -13   4   -1.50   15.20
  -8 -13   4   -4.30   14.40
  -8 -13   4  -12.70    6.50
  -7 -13   4   -2.70    8.40
  -7 -13   4    2.00   13.20
  -6 -13   4   -4.30    8.40
  -6 -13   4   32.00   16.90
   5  13  -4   51.89   16.00
  -5 -13   4   -7.20   11.60
  -5 -13   4    2.40   15.70
  -4 -13   4  -10.50    9.00
  -4 -13   4  -19.40   12.10
  -3 -13   4   -1.70   12.00
  -3 -13   4    8.90   10.20
  -2 -13   4    4.70    9.80
  -2 -13   4    3.40   10.80
  -1 -13   4   -9.30    9.50
  -1 -13   4  -11.60    9.50
   0 -13   4   -9.50   10.30
   1 -13   4  -20.20    9.90
  -2  13  -4   21.20   10.00
   2 -13   4  -10.80   10.40
   3 -13   4   17.50   14.00
   4 -13   4    4.60   10.90
  -5  13  -4   -6.40    8.90
   5 -13   4   -4.90   10.10
  -6  13  -4   30.80   11.30
   6 -13   4  -17.80    9.60
  -7  13  -4  -11.80    7.20
   7 -13   4  -15.20   11.40
  -8  13  -4    1.40    9.10
   8 -13   4    1.00   12.50
   9 -13   4   13.30   15.90
 -10  13  -4   -1.80    8.50
  10 -13   4   -6.90   13.90
 -11  13  -4   22.50   13.60
  11 -13   4   14.20   17.60
 -12 -12   4   33.80   25.00
 -11 -12   4   32.70   25.00
 -10 -12   4   44.90   27.60
  -9 -12   4   96.69   42.80
  -9 -12   4   90.09   37.20
  -8 -12   4   13.90   18.30
  -8 -12   4   31.80   14.70
  -7 -12   4   43.90   19.60
  -7 -12   4   13.80   12.50
  -6 -12   4   23.80   13.40
  -6 -12   4   15.70   16.50
   5  12  -4    9.30   11.80
  -5 -12   4   20.30   12.40
  -5 -12   4   44.20   18.40
  -4 -12   4   10.00   10.30
  -4 -12   4    6.30   12.80
  -3 -12   4   12.80   12.60
  -3 -12   4   11.70   11.80
  -2 -12   4   29.40   17.40
  -2 -12   4   27.40   15.80
  -1 -12   4  110.69   49.40
  -1 -12   4  135.49   49.80
   0 -12   4   21.60   11.10
   0 -12   4   -2.90   12.00
   1 -12   4  133.29   52.89
  -2  12  -4   68.49   23.70
   2 -12   4   30.00   24.80
   3 -12   4   27.30   15.80
   4 -12   4  -12.30   10.70
  -5  12  -4   22.60   13.20
   5 -12   4   24.00   15.30
  -6  12  -4   -4.90    8.40
   6 -12   4   33.80   14.60
  -7  12  -4   16.70   12.70
   7 -12   4   21.80   14.10
  -8  12  -4   48.30   18.80
   8 -12   4   26.50   19.60
  -9  12  -4   31.20   21.10
   9 -12   4   80.69   24.90
 -10  12  -4   16.40   11.70
  10 -12   4   -1.80   13.30
 -11  12  -4    6.00    9.80
 -12  12  -4    9.80   11.80
  12 -12   4    6.20   18.70
 -13 -11   4   -3.50   15.10
 -12 -11   4    8.80   17.50
 -11 -11   4   24.00   21.10
 -10 -11   4   17.70   16.80
  -9 -11   4   -2.10    8.10
  -9 -11   4  -15.00   13.00
  -8 -11   4    2.40    7.80
  -8 -11   4    0.10   12.50
  -7 -11   4   -1.00    7.50
  -7 -11   4   11.40   15.50
  -6 -11   4  -17.00   11.80
  -6 -11   4    2.80    7.90
  -5 -11   4   -1.60    7.70
  -5 -11   4    2.20   13.10
  -4 -11   4   -0.20   10.20
  -4 -11   4    0.40    8.60
  -3 -11   4   -8.00    8.60
  -3 -11   4    5.00   10.80
  -2 -11   4    2.70    9.70
  -2 -11   4  -12.20    7.30
  -1 -11   4    0.00    7.90
  -1 -11   4    8.60   10.20
   0 -11   4   -3.00    6.80
   0 -11   4   -2.90    8.50
   1 -11   4   -3.60    8.80
  -2  11  -4   17.20    9.20
   2 -11   4    4.00   10.20
  -3  11  -4    7.20    7.90
   3 -11   4   -7.90    9.40
  -4  11  -4    2.90    6.90
   4 -11   4    4.60   11.40
  -5  11  -4    4.10    8.10
   5 -11   4  -12.40    8.80
  -6  11  -4  -13.30    6.60
   6 -11   4   -0.80    8.90
  -7  11  -4    6.80   10.00
   7 -11   4   18.80   13.10
  -8  11  -4    1.80    9.10
   8 -11   4   11.80   12.20
  -9  11  -4    9.10   10.10
   9 -11   4   11.50   11.30
 -10  11  -4   -8.50    9.10
  10 -11   4   25.40   13.60
 -11  11  -4   -9.90    7.40
 -11  11  -4    5.30   10.30
  11 -11   4   -2.70   11.30
 -12  11  -4    3.30    9.70
  12 -11   4   25.60   14.90
 -13  11  -4   -0.90    9.50
  13 -11   4    6.10   17.70
 -14 -10   4   44.60   30.00
 -13 -10   4  -14.40   15.10
 -12 -10   4   16.70   21.30
 -11 -10   4    2.40   14.80
 -10 -10   4    7.70   16.40
  -9 -10   4   54.19   27.90
  -8 -10   4   -9.80    4.90
  -8 -10   4    4.00   14.90
  -7 -10   4   30.60   16.50
  -7 -10   4   38.90   20.10
  -6 -10   4   20.60   15.50
  -6 -10   4   12.90   11.20
  -5 -10   4   43.30   23.40
  -5 -10   4   50.49   21.20
   4  10  -4   45.10   22.50
  -4 -10   4   30.30   13.70
  -4 -10   4   11.30   15.50
  -3 -10   4  103.59   39.80
  -3 -10   4   87.89   38.10
  -2 -10   4   19.50   13.10
  -2 -10   4   25.60   13.60
  -1 -10   4  162.38   59.49
  -1 -10   4  146.99   59.59
   0 -10   4   11.40   10.90
  -1  10  -4  143.29   57.19
   1 -10   4  154.68   57.59
  -2  10  -4   20.40    9.90
   2 -10   4    9.30   11.80
  -3  10  -4   90.69   34.60
   3 -10   4   81.79   35.80
   4 -10   4   30.00   16.20
  -5  10  -4   48.70   25.80
   5 -10   4   85.69   27.70
  -6  10  -4   17.90   11.20
  -6  10  -4    7.50   11.00
  -6  10  -4   27.00   13.30
   6 -10   4   35.00   13.80
  -7  10  -4   46.90   18.20
  -7  10  -4   31.10   19.40
  -7  10  -4   52.29   19.30
   7 -10   4   33.30   20.00
  -8  10  -4    1.50   11.50
  -8  10  -4   28.80   12.40
  -8  10  -4   21.40   10.20
   8 -10   4   15.30   12.00
  -9  10  -4   19.40   16.00
   9 -10   4   59.79   18.90
 -10  10  -4   15.80   13.00
 -10  10  -4   19.60   12.00
  10 -10   4   15.60   12.60
 -11  10  -4   13.80   13.20
 -11  10  -4    0.80    9.50
  11 -10   4   23.00   14.10
 -12  10  -4   32.30   15.80
 -12  10  -4    0.10    9.80
  12 -10   4   24.10   14.80
 -13  10  -4  -14.40    8.70
 -13  10  -4   16.40   14.40
  13 -10   4   32.00   15.70
 -14  10  -4   59.29   19.60
 -14  10  -4    1.80   11.10
  14 -10   4   -5.70   19.50
 -14  -9   4   16.40   11.60
 -14  -9   4   19.80   22.90
 -13  -9   4    3.80    8.80
 -12  -9   4    1.00    7.40
 -12  -9   4   -0.90   16.60
 -11  -9   4  -16.70   14.80
 -10  -9   4    6.90   15.70
  -9  -9   4   -4.00   13.10
  -8  -9   4   -0.30    6.30
  -8  -9   4    6.90   13.60
  -7  -9   4  -17.80    9.50
  -7  -9   4    3.00    7.30
  -6  -9   4    3.40   10.80
  -6  -9   4    4.00    7.10
  -5  -9   4   -7.90    9.10
  -5  -9   4    3.40    7.30
  -4  -9   4   11.70    9.80
  -4  -9   4    1.20    7.40
   3   9  -4   28.10   14.20
  -3  -9   4    0.00    9.20
  -3  -9   4    0.40    7.50
  -2  -9   4    7.60    8.70
  -2  -9   4    6.60    8.60
  -1  -9   4   -1.10    7.80
  -1  -9   4    0.60    7.80
   0   9  -4    0.70    9.00
   0  -9   4   -2.80    7.10
   0  -9   4   -2.90    5.90
  -1   9  -4   12.90    8.10
   1  -9   4    2.50    8.90
   1  -9   4    8.10    7.30
  -2   9  -4    8.10    6.50
   2  -9   4   -4.80    7.30
   3  -9   4   -7.40    7.50
  -4   9  -4    1.40    6.50
   4  -9   4    9.20    8.90
  -5   9  -4   15.90    7.80
  -5   9  -4   -4.20    5.60
   5  -9   4    4.40    8.70
  -6   9  -4   -5.70    6.60
  -6   9  -4    0.00   10.40
  -6   9  -4   14.10    6.10
   6  -9   4   19.90    9.70
  -7   9  -4   15.80    8.10
  -7   9  -4   -6.20    5.10
  -7   9  -4   -4.10    7.10
   7  -9   4    8.20    8.20
  -8   9  -4   -2.80    9.20
  -8   9  -4    3.50    8.20
   8  -9   4   16.80   10.00
  -9   9  -4   -4.70    7.50
  -9   9  -4    1.70   10.50
   9  -9   4   12.90    8.90
 -10   9  -4   -5.00    9.80
 -10   9  -4  -10.90    7.30
  10  -9   4   -5.20    8.10
 -11   9  -4   -4.90   10.50
 -11   9  -4   -4.80    8.40
  11  -9   4    2.00    9.90
 -12   9  -4   -8.00    7.50
 -12   9  -4   -4.70   13.20
  12  -9   4   13.40   11.60
 -13   9  -4   10.80   14.70
 -13   9  -4    3.50   11.90
  13  -9   4   20.00   13.00
 -14   9  -4  -20.40    8.70
  14  -9   4   25.00   16.10
 -15  -8   4   30.00   14.60
 -15  -8   4   16.80   24.50
 -14  -8   4  115.19   58.19
 -14  -8   4  133.09   49.80
 -13  -8   4   42.20   17.40
 -13  -8   4   27.00   25.00
 -12  -8   4    6.00   15.70
 -12  -8   4  -15.50    6.30
 -11  -8   4  -10.90    6.80
 -11  -8   4    5.70   16.90
 -10  -8   4    9.50   15.30
 -10  -8   4   15.90    9.20
  -9  -8   4   38.60   23.60
  -9  -8   4   48.90   21.50
  -8  -8   4    6.00   13.10
  -8  -8   4   11.60    8.90
  -7  -8   4    8.40    7.60
  -7  -8   4    8.30   13.00
  -6  -8   4   81.39   37.70
  -6  -8   4   93.79   35.30
  -5  -8   4  162.08   63.99
  -5  -8   4  181.78   65.39
   4   8  -4   89.99   44.10
  -4  -8   4  180.68   47.80
  -4  -8   4  140.59   44.30
   3   8  -4   10.60   14.50
  -3  -8   4   30.10   11.60
  -3  -8   4   20.00   12.40
  -2  -8   4  158.28   56.29
  -2  -8   4  135.99   56.49
  -1  -8   4  125.59   53.89
  -1  -8   4  161.18   54.09
   0   8  -4   49.50   18.80
   0  -8   4   39.80   18.70
   0  -8   4   40.60   18.80
  -1   8  -4  106.89   38.40
   1  -8   4  120.99   39.50
   1  -8   4   86.79   38.00
   2  -8   4  147.19   56.59
  -3   8  -4   43.30   17.40
   3  -8   4   36.50   18.00
  -4   8  -4  133.39   55.39
  -4   8  -4  151.78   55.79
   4  -8   4  149.29   55.39
  -5   8  -4  176.68   60.99
  -5   8  -4  109.69   61.29
   5  -8   4  184.18   61.49
  -6   8  -4   76.59   28.50
  -6   8  -4   66.39   29.20
  -6   8  -4   67.79   29.00
   6  -8   4   76.89   29.60
  -7   8  -4   11.00    8.00
  -7   8  -4    5.40    8.10
   7  -8   4    7.80    8.80
  -8   8  -4   10.20   10.20
  -8   8  -4    0.20    7.80
   8  -8   4   11.00    8.90
  -9   8  -4   39.90   18.80
  -9   8  -4   39.90   20.00
   9  -8   4   44.80   19.10
 -10   8  -4   25.70   13.30
 -10   8  -4   17.30   14.60
  10  -8   4   30.20   13.50
 -11   8  -4   17.70   10.30
 -11   8  -4   15.90   14.80
  11  -8   4   10.00   10.30
 -12   8  -4   37.60   16.70
 -12   8  -4   -3.80    9.30
  12  -8   4   20.10   11.40
 -13   8  -4   16.30   14.30
 -13   8  -4   57.19   21.40
  13  -8   4   29.40   16.30
 -14   8  -4  131.19   48.30
 -14   8  -4  104.59   51.49
  14  -8   4  129.09   49.30
 -15   8  -4   -2.00   16.60
 -15   8  -4   -7.90    9.60
  15  -8   4  -13.80   17.30
 -15  -7   4    2.40    8.10
 -15  -7   4   -2.40   18.30
 -14  -7   4   -2.80   16.50
 -14  -7   4    5.10    6.40
 -13  -7   4   -9.50    6.80
 -13  -7   4   -1.80   15.50
 -12  -7   4   -7.80   12.90
 -12  -7   4    0.70    7.30
 -11  -7   4  -11.40   10.00
 -11  -7   4   -2.60    6.20
 -10  -7   4    6.20   11.50
  -9  -7   4   -4.30    6.00
  -8  -7   4   14.90   12.10
  -8  -7   4   -3.40    5.70
  -7  -7   4    6.00    6.30
  -7  -7   4    5.40    5.80
  -7  -7   4   -4.20    9.80
  -6  -7   4   -1.10    9.70
  -6  -7   4   -5.50    5.30
  -5  -7   4   -6.60    7.80
  -5  -7   4   -7.60    5.50
   4   7  -4  -14.60    8.70
   4   7  -4    0.60    8.50
  -4  -7   4   -3.00    7.60
  -4  -7   4   -6.10    5.10
   3   7  -4   10.60   10.80
  -3  -7   4   -1.00    5.20
  -3  -7   4    6.40    8.10
   2   7  -4    2.40   12.10
  -2  -7   4    1.00    7.50
  -2  -7   4   -9.50    5.30
   1   7  -4   14.60   13.00
   1   7  -4   -2.80    5.80
  -1  -7   4    4.40    6.80
  -1  -7   4    1.90    6.30
   0   7  -4   19.00    7.10
   0  -7   4   -4.10    5.90
   0  -7   4   -1.70    5.50
   1  -7   4   -2.20    5.20
   1  -7   4    5.90    6.70
  -2   7  -4    3.30    5.70
   2  -7   4    7.70    7.10
  -3   7  -4   -6.30    4.60
   3  -7   4    8.10    6.70
  -4   7  -4   -2.90    5.50
  -4   7  -4   -2.70    4.80
   4  -7   4   -5.00    5.90
  -5   7  -4   -0.50    4.90
  -5   7  -4    2.00    5.50
   5  -7   4    0.40    6.30
  -6   7  -4   -3.10    5.80
  -6   7  -4   -1.80    6.20
   6  -7   4   -1.40    6.50
  -7   7  -4   -0.50    8.00
  -7   7  -4   -1.80    6.10
   7  -7   4    9.30    7.30
  -8   7  -4    2.90    7.20
  -8   7  -4   -3.10    8.90
   8  -7   4   -1.90    7.10
  -9   7  -4   -1.40    6.80
  -9   7  -4   -5.00    8.80
   9  -7   4    1.80    7.70
 -10   7  -4   -4.80    6.90
 -10   7  -4   -1.70   11.10
  10  -7   4    2.90    8.20
 -11   7  -4   10.80    8.10
 -11   7  -4   -0.50   11.40
  11  -7   4   -0.20    8.30
 -12   7  -4   14.50    8.90
 -12   7  -4   20.10   14.60
  12  -7   4    3.20    8.80
 -13   7  -4   -7.00    7.20
 -13   7  -4   -9.10   12.80
  13  -7   4    5.50   10.50
 -14   7  -4  -18.50   12.00
 -14   7  -4   -2.40    9.30
  14  -7   4   19.40   12.40
 -15   7  -4   24.50   14.30
 -15   7  -4  -10.90    9.20
  15  -7   4  -14.50   13.90
 -16  -6   4   89.19   21.80
 -16  -6   4   -0.50   25.30
 -15  -6   4    8.50   20.80
 -15  -6   4   27.80   12.30
 -14  -6   4   40.50   19.90
 -14  -6   4   72.89   31.60
 -13  -6   4   35.90   22.30
 -13  -6   4   25.80   13.40
 -12  -6   4   54.59   28.10
 -12  -6   4   49.00   20.70
 -11  -6   4   32.30   16.80
 -11  -6   4    5.40    7.90
 -10  -6   4  160.18   55.49
 -10  -6   4  119.99   49.50
  -9  -6   4  165.88   66.79
  -9  -6   4  226.78   72.19
  -8  -6   4  192.78   60.49
  -8  -6   4  135.39   55.39
  -7  -6   4   92.19   35.30
  -7  -6   4   76.59   31.60
  -6  -6   4   34.90   17.20
  -6  -6   4   57.69   18.20
  -6  -6   4   36.00   20.00
  -5  -6   4  208.78   77.29
  -5  -6   4  203.98   78.49
   4   6  -4   67.99   34.70
  -4  -6   4  101.29   33.90
  -4  -6   4  112.59   36.40
  -3  -6   4  369.96  140.29
  -3  -6   4  382.16  139.89
   2   6  -4   56.79   21.70
   2   6  -4   36.70   22.90
  -2  -6   4   48.90   20.30
  -2  -6   4   58.69   21.60
   1   6  -4   35.50   15.20
   1   6  -4    5.00   18.00
  -1  -6   4   47.10   15.10
  -1  -6   4   39.00   15.40
   0  -6   4  206.58   75.59
   0  -6   4  196.48   75.49
  -1   6  -4   49.40   20.20
  -1   6  -4   42.70   20.50
   1  -6   4   54.69   20.50
   1  -6   4   48.80   19.80
  -2   6  -4   72.19   26.30
  -2   6  -4   67.19   26.20
   2  -6   4   58.59   26.20
  -3   6  -4  362.26  150.18
  -3   6  -4  422.06  150.18
   3  -6   4  430.76  150.38
  -4   6  -4  117.99   39.50
  -4   6  -4  120.69   40.00
  -4   6  -4   88.99   39.10
   4  -6   4  104.69   39.40
  -5   6  -4  202.38   78.39
  -5   6  -4  198.38   78.59
   5  -6   4  228.08   78.59
  -6   6  -4   46.80   19.50
  -6   6  -4   34.20   18.60
   6  -6   4   54.09   19.10
  -7   6  -4   78.39   32.40
  -7   6  -4   89.09   34.70
   7  -6   4   80.29   32.10
  -8   6  -4  151.38   59.99
  -8   6  -4  162.48   61.49
   8  -6   4  158.28   59.29
  -9   6  -4  203.18   77.09
  -9   6  -4  218.88   77.99
   9  -6   4  195.68   75.69
 -10   6  -4  176.08   64.99
 -10   6  -4  167.48   62.39
  10  -6   4  155.78   61.59
 -11   6  -4    9.40   11.10
 -11   6  -4   30.50   17.20
  11  -6   4   27.20   12.50
 -12   6  -4   52.99   22.30
 -12   6  -4   20.00   16.10
  12  -6   4   46.60   17.30
 -13   6  -4   17.80   14.10
 -13   6  -4   34.70   22.70
  13  -6   4   38.00   15.70
 -14   6  -4   52.09   23.70
 -14   6  -4   51.99   28.60
  14  -6   4   56.69   24.20
 -15   6  -4   12.20   12.70
 -15   6  -4    7.20   15.10
  15  -6   4   -0.60   12.60
 -16   6  -4   34.60   16.30
 -16   6  -4   32.20   24.70
  16  -6   4    9.00   20.50
 -16  -5   4   44.50   11.10
 -16  -5   4  -11.30   14.00
 -15  -5   4    8.60    7.70
 -15  -5   4   23.50   21.00
 -14  -5   4    7.00   15.70
 -14  -5   4   -5.00    5.90
 -13  -5   4   20.50   18.90
 -13  -5   4    1.90    6.70
 -12  -5   4   -1.30    5.70
 -12  -5   4    7.60   15.60
 -11  -5   4   25.60   19.50
 -10  -5   4   -3.80    4.90
  -9  -5   4   -1.30    4.50
  -9  -5   4    3.00   11.60
  -8  -5   4    1.30    9.70
  -8  -5   4   -3.40    4.00
  -7  -5   4   -7.00    3.50
  -7  -5   4  -11.70    7.80
  -6  -5   4   -2.20    4.00
  -6  -5   4    3.30    4.00
  -6  -5   4   -6.30    6.90
  -5  -5   4    3.90    4.40
  -5  -5   4   -3.30    3.90
  -5  -5   4    1.10    6.70
  -4  -5   4    1.60    4.80
  -4  -5   4    4.70    7.60
   3   5  -4   -4.40    2.90
  -3  -5   4    2.60    5.40
  -3  -5   4    8.50    7.80
   2   5  -4    4.00    6.50
   2   5  -4   -0.60    3.00
  -2  -5   4   -0.60    4.90
  -2  -5   4   -5.40    5.80
   1   5  -4    3.50    6.00
   1   5  -4   -4.90    5.30
  -1  -5   4    0.00    5.80
  -1  -5   4    0.30    5.70
   0   5  -4   -2.50    5.40
   0   5  -4    4.00    5.60
   0  -5   4    1.70    5.70
   0  -5   4   -0.20    5.40
  -1   5  -4   10.20   14.70
  -1   5  -4    1.60    5.60
  -1   5  -4    2.50    5.00
   1  -5   4   -8.20    5.10
   1  -5   4    3.80    5.30
  -2   5  -4    2.00    5.10
  -2   5  -4    0.60    4.60
   2  -5   4   12.30    6.20
  -3   5  -4    2.30    5.30
  -3   5  -4    4.70    5.60
  -3   5  -4   11.30    6.20
   3  -5   4    8.40    6.10
  -4   5  -4   -2.40    4.80
  -4   5  -4   -5.50    4.60
   4  -5   4   -1.10    5.10
  -5   5  -4    0.00    4.30
  -5   5  -4   -7.40    4.70
   5  -5   4    0.50    5.00
  -6   5  -4    0.40    5.40
  -6   5  -4    6.20    6.50
   6  -5   4    0.20    5.20
  -7   5  -4   -4.00    5.40
  -7   5  -4   -4.20    7.70
   7  -5   4   -2.20    4.70
  -8   5  -4    8.40    6.70
  -8   5  -4    8.50    9.30
   8  -5   4    1.40    6.20
  -9   5  -4   -0.10   10.20
  -9   5  -4    6.40    6.30
   9  -5   4    7.60    6.70
 -10   5  -4    5.30    7.10
 -10   5  -4    9.10   11.00
  10  -5   4    5.20    7.10
 -11   5  -4   -8.60    9.60
 -11   5  -4   -7.60    5.80
  11  -5   4    3.30    7.80
 -12   5  -4   13.30   13.80
 -12   5  -4   -0.20    7.70
  12  -5   4    7.50    8.70
 -13   5  -4   11.20    8.60
 -13   5  -4    7.80   14.10
  13  -5   4    1.40    7.80
 -14   5  -4  -13.90   12.60
 -14   5  -4  -17.30    8.60
  14  -5   4   -1.00    9.10
 -15   5  -4   10.00   11.40
 -15   5  -4   26.20   19.00
  15  -5   4   18.10   12.90
 -16   5  -4   10.60   17.20
 -16   5  -4    3.10   10.60
  16  -5   4    4.10   15.60
 -16  -4   4   24.60   22.10
 -15  -4   4   49.80   25.80
 -15  -4   4   35.90   16.90
 -14  -4   4   22.80    8.50
 -14  -4   4   -5.90   13.90
 -13  -4   4   18.50   15.90
 -13  -4   4    4.50    7.10
 -12  -4   4  226.08   78.59
 -12  -4   4  184.48   71.29
 -11  -4   4  103.79   40.00
 -11  -4   4  107.59   45.90
 -10  -4   4  154.08   62.49
 -10  -4   4  258.07   70.89
  -9  -4   4   87.79   44.40
  -9  -4   4  115.69   40.80
  -8  -4   4  211.98   65.89
  -8  -4   4  153.08   60.89
  -7  -4   4   99.89   38.70
  -7  -4   4  107.79   42.60
  -6  -4   4   31.60   13.40
  -6  -4   4   35.90   17.50
  -5  -4   4   55.09   19.90
  -5  -4   4   49.10   20.30
  -5  -4   4   45.80   22.50
   4   4  -4   -1.30    9.20
   4   4  -4   14.10    4.80
  -4  -4   4   10.70    5.20
  -4  -4   4   -0.70   10.80
  -4  -4   4    5.20    5.60
   3   4  -4   80.99   35.80
   3   4  -4  111.29   38.10
   3   4  -4  105.49   37.10
  -3  -4   4   92.29   36.30
  -3  -4   4  135.29   38.50
   2   4  -4  362.36  135.09
   2   4  -4  373.36  134.79
  -2  -4   4  374.56  134.59
  -2  -4   4  340.27  134.99
   1   4  -4  127.69   49.40
   1   4  -4  142.59   49.90
  -1  -4   4  127.39   49.30
  -1  -4   4  130.89   49.70
   0   4  -4   54.49   21.00
   0   4  -4   40.80   21.10
   0  -4   4   55.39   21.00
   0  -4   4   63.29   21.40
  -1   4  -4  145.39   52.59
  -1   4  -4  148.19   52.89
   1  -4   4  141.79   52.59
   1  -4   4  129.49   52.59
  -2   4  -4  340.17  127.69
  -2   4  -4  344.67  127.79
   2  -4   4  348.67  127.79
  -3   4  -4   98.49   35.30
   3  -4   4   88.59   35.40
  -4   4  -4   12.50    7.30
  -4   4  -4   21.40    7.90
   4  -4   4   12.80    7.40
  -5   4  -4   43.70   20.40
  -5   4  -4   49.40   21.50
   5  -4   4   59.49   20.50
  -6   4  -4   17.60   11.70
  -6   4  -4   33.80   14.30
   6  -4   4   32.80   12.10
  -7   4  -4   71.29   30.70
  -7   4  -4   67.89   32.20
   7  -4   4   88.69   30.20
  -8   4  -4  144.89   56.49
  -8   4  -4  193.68   59.79
   8  -4   4  141.19   56.39
  -9   4  -4   80.69   38.60
  -9   4  -4   98.79   41.50
   9  -4   4  125.29   39.30
 -10   4  -4  190.08   69.99
 -10   4  -4  179.78   66.29
  10  -4   4  169.48   66.19
 -11   4  -4  153.48   48.50
 -11   4  -4  102.99   51.39
  11  -4   4  115.99   48.60
 -12   4  -4  265.57   86.59
 -12   4  -4  272.67   91.59
  12  -4   4  193.08   86.39
 -13   4  -4    6.70    9.70
 -13   4  -4   22.40   17.60
  13  -4   4   16.40    9.40
 -14   4  -4    7.70    9.30
 -14   4  -4   16.50   15.90
  14  -4   4    8.00   10.30
 -15   4  -4   46.10   27.20
 -15   4  -4   24.90   19.70
  15  -4   4   76.29   22.30
 -16   4  -4   32.10   23.10
 -16   4  -4   32.20   16.70
  16  -4   4   32.70   18.70
 -17  -3   4   -8.60   15.30
 -16  -3   4   23.60   38.00
 -16  -3   4   51.39   19.60
 -15  -3   4   24.00    9.50
 -15  -3   4    2.60   17.30
 -14  -3   4   -7.00   14.40
 -14  -3   4    3.80    5.30
 -13  -3   4   -4.30   16.40
 -13  -3   4   15.70    7.40
 -12  -3   4    8.40   14.30
 -11  -3   4    3.10   15.50
 -11  -3   4    6.00    5.20
 -10  -3   4    1.70    4.10
 -10  -3   4   21.90   14.10
 -10  -3   4   -3.20   10.60
  -9  -3   4   11.20    9.70
  -9  -3   4   -5.60    8.90
  -9  -3   4   -1.00    3.70
   8   3  -4   -1.10    9.20
  -8  -3   4   -1.70    3.10
  -8  -3   4    8.40    8.80
  -8  -3   4    3.50    9.60
   7   3  -4    1.20    8.50
  -7  -3   4    4.90    8.10
  -7  -3   4   -4.60    3.00
  -7  -3   4   19.30   11.10
   6   3  -4    4.50    8.70
  -6  -3   4   -7.70    2.80
  -6  -3   4    4.70    7.30
  -6  -3   4    0.60    7.60
   5   3  -4    9.30    4.60
   5   3  -4   -0.20    9.40
  -5  -3   4    6.70    4.70
  -5  -3   4    2.20    7.40
  -5  -3   4   16.50    8.50
   4   3  -4   -1.70    2.60
   4   3  -4   -7.80    6.10
   4   3  -4   -1.00    9.80
   4   3  -4   -5.30    3.90
  -4  -3   4    0.50    8.30
  -4  -3   4    2.50    3.30
  -4  -3   4    9.70    7.80
   3   3  -4    0.90    2.70
   3   3  -4    7.70    7.30
   3   3  -4    3.40    8.60
   3   3  -4   -1.40    4.30
  -3  -3   4   -7.30    6.10
  -3  -3   4   -5.10    3.20
  -3  -3   4    0.80    3.90
   2   3  -4   -0.70    2.70
   2   3  -4    6.60   10.70
   2   3  -4   -8.60    5.80
  -2  -3   4   -1.90    6.00
  -2  -3   4    2.00    3.90
   1   3  -4   -0.20    4.50
   1   3  -4   -0.90    5.80
  -1  -3   4   -3.00    4.40
  -1  -3   4   -5.60    5.30
   0   3  -4   -7.50    5.00
   0  -3   4    3.40    4.50
   0  -3   4    5.00    5.20
  -1   3  -4    4.80    4.50
  -1   3  -4    1.40    4.70
   1  -3   4   -0.10    4.30
  -2   3  -4    4.30    4.50
  -2   3  -4   -2.10    4.10
   2  -3   4   -2.70    4.30
  -3   3  -4   -3.10   14.90
  -3   3  -4   -2.80    4.50
  -3   3  -4   -2.10    3.80
   3  -3   4   -1.70    3.90
  -4   3  -4   15.60   15.40
  -4   3  -4    8.40    6.60
   4  -3   4    1.50    3.90
   4  -3   4    1.20    4.20
  -5   3  -4    6.10    6.50
  -5   3  -4   -2.60    4.20
   5  -3   4    2.30    4.10
  -6   3  -4    0.30    4.10
  -6   3  -4    9.20    7.60
   6  -3   4    1.00    4.10
  -7   3  -4    6.00    4.90
  -7   3  -4    4.60    9.30
   7  -3   4    7.20    4.90
  -8   3  -4    4.60    4.50
  -8   3  -4    1.90    8.60
   8  -3   4   -4.50    3.90
  -9   3  -4    2.20    5.30
  -9   3  -4   -9.30    8.50
   9  -3   4   -1.30    5.30
 -10   3  -4    0.00    5.50
 -10   3  -4    4.60   11.30
  10  -3   4   10.80    6.60
 -11   3  -4    8.60   13.10
 -11   3  -4    3.40    6.90
  11  -3   4   -3.00    6.60
 -12   3  -4   25.60   16.60
 -12   3  -4    1.00    7.50
  12  -3   4    4.50    7.40
 -13   3  -4   23.00   15.70
 -13   3  -4    4.60    7.80
  13  -3   4   11.60    9.20
 -14   3  -4  -10.10   11.10
 -14   3  -4   -7.90    7.70
  14  -3   4    9.70    9.50
 -15   3  -4    6.70   11.20
 -15   3  -4   22.00   18.90
  15  -3   4   26.20   13.10
 -16   3  -4   22.30   21.00
 -16   3  -4    1.60   15.00
  16  -3   4   22.10   14.00
 -17  -2   4    9.30   15.40
 -16  -2   4   39.10   12.30
 -16  -2   4   -5.30   18.20
 -15  -2   4    3.70   16.80
 -15  -2   4   33.20   11.40
 -14  -2   4   69.19   25.60
 -14  -2   4   51.89   31.40
 -13  -2   4   83.59   41.70
 -13  -2   4   95.79   35.70
 -12  -2   4   44.90   31.40
 -12  -2   4   78.69   26.90
 -11  -2   4  217.48   74.89
 -11  -2   4  179.28   69.39
 -10  -2   4   38.50   21.50
 -10  -2   4   37.70   15.30
  -9  -2   4  219.48   63.09
  -9  -2   4  129.89   57.39
  -9  -2   4  175.88   58.99
   8   2  -4  134.89   35.30
  -8  -2   4   73.09   33.10
  -8  -2   4   65.39   29.40
  -8  -2   4   87.69   32.50
   7   2  -4  130.49   35.80
  -7  -2   4   68.69   34.30
  -7  -2   4   73.29   31.30
  -7  -2   4   83.19   33.70
   6   2  -4  195.48   66.99
   6   2  -4  193.48   68.09
  -6  -2   4  161.38   67.69
  -6  -2   4  165.08   68.59
   5   2  -4  247.28   75.79
   5   2  -4  196.08   76.79
  -5  -2   4  170.78   76.99
  -5  -2   4  207.48   76.49
  -5  -2   4  181.08   75.79
   4   2  -4  666.43  239.48
   4   2  -4  636.94  240.08
  -4  -2   4  629.24  240.08
  -4  -2   4  642.54  239.58
  -4  -2   4  654.03  239.18
   3   2  -4  217.78   89.19
   3   2  -4  277.07   87.99
   3   2  -4  224.98   88.89
  -3  -2   4  185.68   88.69
  -3  -2   4  240.18   87.99
   2   2  -4  143.39   47.90
   2   2  -4  130.39   47.70
   2   2  -4  109.19   48.40
  -2  -2   4  145.49   47.80
  -2  -2   4  118.89   48.70
  -2  -2   4  121.79   47.70
  -2  -2   4  118.09   48.50
   1   2  -4  102.19   43.10
   1   2  -4  122.19   43.60
  -1  -2   4  137.59   43.60
  -1  -2   4  110.09   43.10
   0   2  -4   81.99   35.20
   0   2  -4   98.89   34.90
   0  -2   4   99.49   34.80
   0  -2   4   88.99   35.10
  -1   2  -4  106.39   40.30
  -1   2  -4  116.49   40.20
   1  -2   4  100.49   40.10
  -2   2  -4  147.49   48.90
  -2   2  -4  110.69   49.10
   2  -2   4  136.59   48.90
   2  -2   4  120.29   49.00
  -3   2  -4  176.88   73.59
   3  -2   4  167.68   73.69
   3  -2   4  230.88   73.49
  -4   2  -4  572.64  218.48
  -4   2  -4  680.73  219.08
   4  -2   4  484.05  218.38
   4  -2   4  639.74  218.38
  -5   2  -4  189.08   70.09
  -5   2  -4  183.28   69.19
   5  -2   4  186.38   68.99
  -6   2  -4  168.68   64.89
  -6   2  -4  172.48   63.69
  -7   2  -4   76.39   27.60
  -7   2  -4   63.89   29.90
  -8   2  -4   86.39   32.70
  -8   2  -4   84.39   35.80
  -9   2  -4  181.08   68.49
  -9   2  -4  191.28   72.19
 -10   2  -4   46.70   17.70
 -10   2  -4   35.30   22.10
 -11   2  -4  243.08   87.09
 -11   2  -4  211.18   90.59
 -12   2  -4   68.09   29.40
 -12   2  -4   99.19   36.00
 -13   2  -4  104.49   38.10
 -13   2  -4   83.09   43.50
 -14   2  -4   58.99   26.40
 -14   2  -4   42.90   32.20
  14  -2   4   86.69   27.90
 -15   2  -4   -9.00    8.20
 -15   2  -4   -1.90   15.40
  15  -2   4   20.40    9.60
 -16   2  -4   -4.80   17.40
 -16   2  -4   17.80   12.40
  16  -2   4   14.80   12.90
 -17   2  -4    1.10   10.10
 -17   2  -4    4.20   19.60
  17  -2   4    8.30   15.60
 -17  -1   4    2.80   23.20
 -17  -1   4   91.39   21.00
 -16  -1   4    8.40   21.00
 -16  -1   4   44.70   15.00
 -15  -1   4   30.80   13.50
 -14  -1   4   12.10    7.20
 -14  -1   4    0.60   14.00
 -13  -1   4    4.10    6.00
 -13  -1   4    5.70   14.10
 -12  -1   4   13.70   15.00
 -12  -1   4    0.90    5.20
 -11  -1   4   -9.60    4.10
 -11  -1   4   -4.80   12.20
 -10  -1   4   -3.60    4.10
 -10  -1   4   11.10   12.30
   9   1  -4    7.30   14.60
  -9  -1   4   -2.40   10.10
  -9  -1   4    0.10    3.90
   8   1  -4  -18.60   11.30
  -8  -1   4    5.30    9.00
  -8  -1   4   34.50   14.40
  -8  -1   4    7.40    4.30
   7   1  -4   -8.70   11.80
  -7  -1   4    2.70   12.70
  -7  -1   4   -0.70    8.80
  -7  -1   4    4.30    3.20
   6   1  -4   -2.10   10.90
   6   1  -4   -0.20    2.20
  -6  -1   4    4.80    8.80
  -6  -1   4    2.00    3.00
  -6  -1   4    2.40   13.60
   5   1  -4   -3.00    1.90
   5   1  -4   -6.30    6.30
   5   1  -4    5.70   12.80
  -5  -1   4  -10.30   10.30
  -5  -1   4   -4.80    2.50
  -5  -1   4    3.10    7.30
   4   1  -4   -5.10   11.90
   4   1  -4    0.30    1.90
   4   1  -4    2.60    7.10
  -4  -1   4    1.00    2.20
  -4  -1   4   10.10    9.90
  -4  -1   4   -1.30    6.60
   3   1  -4    3.60    6.50
   3   1  -4    0.10   12.30
   3   1  -4    0.80    1.80
  -3  -1   4    8.10    6.50
  -3  -1   4    6.00    8.90
  -3  -1   4   -1.70    2.10
   2   1  -4    1.90   10.20
   2   1  -4   -1.20    1.60
   2   1  -4   -8.50    5.20
  -2  -1   4   -0.20    8.30
  -2  -1   4   -5.30    1.80
  -2  -1   4    2.20    5.00
   1   1  -4   -0.30    1.30
   1   1  -4    3.30    8.10
   1   1  -4    5.50    4.70
  -1  -1   4   -7.70    8.60
  -1  -1   4    1.70    4.00
   0   1  -4    0.90    1.70
   0   1  -4   -0.70    3.20
   0  -1   4   -1.40    3.10
  -1   1  -4   -3.00    2.10
  -1   1  -4   -0.10    1.60
   1  -1   4    0.00    1.20
   1  -1   4   -2.20    1.90
  -2   1  -4   -4.00    2.60
   2  -1   4    2.50    2.40
  -3   1  -4   -0.10    2.70
   3  -1   4    1.30    2.50
  -4   1  -4    7.40   13.40
  -4   1  -4    4.60    6.60
  -4   1  -4   -1.90    2.70
   4  -1   4    2.00    2.50
  -5   1  -4   -0.90    3.10
  -5   1  -4  -11.80   10.20
  -5   1  -4    4.60    7.90
   5  -1   4   -6.60    4.30
  -6   1  -4    3.20    3.50
  -6   1  -4  -10.60   11.60
  -7   1  -4    8.40    4.20
  -7   1  -4   -1.70    7.60
   7  -1   4    2.00    3.40
  -8   1  -4   -0.50    3.80
  -8   1  -4    0.60    8.80
   8  -1   4    0.30    3.00
  -9   1  -4    6.10    4.80
  -9   1  -4   -3.50    9.50
 -10   1  -4    1.00    5.10
 -10   1  -4   -2.80   11.10
 -11   1  -4   -5.90    6.00
 -11   1  -4    9.30   12.80
 -12   1  -4   14.00    8.40
 -13   1  -4    3.70   13.60
 -13   1  -4    4.20    7.20
 -14   1  -4    4.30    7.80
 -14   1  -4   10.80   17.20
 -15   1  -4    7.90    8.70
 -15   1  -4    1.30   14.40
 -16   1  -4   20.60   20.60
 -16   1  -4   17.00   11.20
 -17   1  -4   21.10   10.90
 -17   1  -4   11.70   16.50
  17  -1   4    4.70   14.90
 -17   0   4  201.18   56.39
 -17   0   4   87.09   58.49
 -16   0   4   41.20   31.90
 -16   0   4   68.49   24.80
 -15   0   4   13.20   19.30
 -15   0   4   10.70    8.20
 -14   0   4   21.80   20.40
 -14   0   4   29.00   12.70
 -13   0   4   46.10   22.40
 -13   0   4   31.10   14.60
 -12   0   4   71.29   50.89
 -12   0   4  109.79   39.80
 -11   0   4  156.38   69.69
 -11   0   4  181.18   65.59
 -10   0   4  192.28   72.59
 -10   0   4  210.48   77.69
   9   0  -4    5.10   17.50
  -9   0   4   11.00   11.40
  -9   0   4    6.00    4.60
   8   0  -4   32.00   18.90
  -8   0   4   13.20   14.90
  -8   0   4   32.70   11.40
   7   0  -4  211.68  103.69
  -7   0   4  296.67  100.39
  -7   0   4  338.97  102.89
  -7   0   4  200.38  101.79
   6   0  -4    8.00   13.70
   6   0  -4    3.00    3.30
  -6   0   4    1.60    9.70
  -6   0   4   10.60    3.60
  -6   0   4  -12.70   12.80
   5   0  -4  150.48   67.59
   5   0  -4  183.08   68.19
  -5   0   4  191.98   68.59
  -5   0   4  191.18   66.59
  -5   0   4  166.98   67.79
   4   0  -4  376.26  145.09
  -4   0   4  351.36  144.79
  -4   0   4  410.56  143.99
  -4   0   4  402.76  144.99
   3   0  -4  151.98   50.59
   3   0  -4  103.59   49.60
   3   0  -4  139.99   51.49
  -3   0   4  169.48   51.19
  -3   0   4  130.29   50.49
  -3   0   4  143.49   49.60
   2   0  -4 1025.50  389.46
   2   0  -4 1073.09  389.66
  -2   0   4  992.00  389.16
  -2   0   4 1016.00  389.46
  -2   0   4 1170.18  389.66
   1   0  -4   -0.90   11.30
   1   0  -4   21.60    6.90
  -1   0   4   40.50   11.40
  -1   0   4   16.30    6.80
   0   0  -4  463.85  171.68
  -1   0  -4   32.60   11.40
  -1   0  -4   29.60   11.20
   1   0   4   25.60   11.20
   1   0   4   35.90   11.40
  -2   0  -4 1339.97  427.16
  -2   0  -4 1051.89  427.06
   2   0   4 1103.99  427.06
   2   0   4 1133.99  427.16
  -3   0  -4  142.29   52.29
   3   0   4  143.19   51.39
   3   0   4  131.69   51.39
  -4   0  -4  357.76  131.89
   4   0   4  393.96  130.99
   4   0   4  312.67  130.89
  -5   0  -4  157.48   56.39
  -5   0  -4  153.48   56.59
   5   0   4  119.29   54.89
   5   0   4  173.28   55.09
  -6   0  -4    6.10   13.70
  -6   0  -4   -5.90    6.70
  -6   0  -4    9.10    3.90
   6   0   4    6.00    4.20
  -7   0  -4  224.18   96.69
  -7   0  -4  289.57   95.19
   7   0   4  239.78   95.29
  -8   0  -4   24.30   15.90
  -8   0  -4   38.00   11.20
   8   0   4   17.30   11.40
  -9   0  -4   11.60   13.00
  -9   0  -4   21.10    8.70
 -10   0  -4  191.98   72.99
 -10   0  -4  211.48   77.89
 -11   0  -4  183.18   72.29
 -11   0  -4  243.58   78.49
 -12   0  -4   78.49   29.70
 -12   0  -4   69.49   35.60
 -13   0  -4   22.40   11.40
 -13   0  -4   23.40   19.40
 -14   0  -4   47.00   22.30
 -14   0  -4   19.60   12.10
 -15   0  -4   15.50   10.20
 -15   0  -4   19.50   18.50
 -16   0  -4   31.90   29.90
 -16   0  -4   58.39   21.80
 -17   0  -4  125.29   58.39
 -17   0  -4  139.99   52.19
  17  -1  -4   22.10   16.60
 -17   1   4   28.70   15.30
 -16   1   4    5.80   16.40
 -16   1   4    2.80    7.50
 -15   1   4  -13.70    6.40
 -15   1   4   11.80   14.90
 -14   1   4   -7.20    6.50
 -14   1   4   25.10   17.00
 -13   1   4   -7.10    6.10
 -13   1   4   19.20   16.60
 -12   1   4    9.70    6.90
 -12   1   4    1.30   13.30
 -11   1   4   -0.70   12.80
 -11   1   4   16.60    7.00
 -10   1   4   -8.40   10.70
 -10   1   4    1.50    4.40
   9  -1  -4    0.40   16.50
  -9   1   4   -2.60    3.70
  -9   1   4    9.30   10.60
   8  -1  -4    8.50   13.90
  -8   1   4    7.30    3.80
  -8   1   4  -11.70    6.90
   7  -1  -4   13.40   14.70
  -7   1   4   -1.40    3.00
  -7   1   4    0.80    8.30
   6  -1  -4  -21.40   19.30
   6  -1  -4   -1.10    6.40
   6  -1  -4   -4.40    2.50
  -6   1   4    8.90    8.10
  -6   1   4   25.90   17.30
  -6   1   4    3.20    3.70
   5  -1  -4    2.40    6.80
   5  -1  -4   -0.70   14.00
   5  -1  -4    1.70    3.10
  -5   1   4   -2.00    6.70
  -5   1   4    0.80   15.90
  -5   1   4    2.20    2.60
   4  -1  -4   -5.40   14.60
   4  -1  -4   -1.50    2.70
   4  -1  -4    4.50    6.20
  -4   1   4    1.40    2.60
  -4   1   4   -4.50    6.60
  -4   1   4  -15.70   16.70
   3  -1  -4   -1.90   14.80
   3  -1  -4    0.10    2.80
   3  -1  -4    7.90    5.80
  -3   1   4   -3.80    2.50
  -3   1   4    1.90    5.50
  -3   1   4  -15.00   13.70
   2  -1  -4   14.80   13.60
   2  -1  -4    2.00    4.50
  -2   1   4   -0.40    2.60
  -2   1   4    3.00    4.20
  -2   1   4  -16.50   12.40
   1  -1  -4    0.30    3.10
   1  -1  -4    1.40    3.20
   1  -1  -4   -6.90   11.70
  -1   1   4  -11.80    8.90
  -1   1   4   -2.30    2.80
   0  -1  -4    0.20    7.90
   0  -1  -4   -0.10    1.70
   0  -1  -4    7.20    3.40
   0   1   4   -1.10    1.60
   0   1   4    2.20    3.20
   0   1   4   12.50    7.90
  -1  -1  -4   -0.20    3.00
  -1  -1  -4   -6.20    1.90
  -1  -1  -4   -2.50    7.50
   1   1   4   -5.30    3.00
   1   1   4    8.80    7.70
  -2  -1  -4   -7.00    2.40
  -2  -1  -4   -5.30    4.50
  -2  -1  -4    2.40    3.40
   2   1   4   -0.90    3.80
   2   1   4    4.30    2.50
  -3  -1  -4    2.40    3.50
  -3  -1  -4   -7.30    6.00
  -3  -1  -4   -4.10    2.90
   3   1   4    1.90    5.90
   3   1   4    3.00    2.70
   3   1   4    1.70    4.00
  -4  -1  -4    1.40    2.70
  -4  -1  -4   -1.20    3.00
  -4  -1  -4   -2.30    6.70
   4   1   4   -7.40    5.30
   4   1   4    3.60    4.40
   4   1   4    0.20    2.30
  -5  -1  -4   -0.90    9.20
  -5  -1  -4    4.80    7.80
  -5  -1  -4    3.10    3.90
   5   1   4   -0.70    3.70
   5   1   4   -1.30    2.80
  -6  -1  -4    2.20   11.80
  -6  -1  -4    4.80    3.70
  -6  -1  -4    3.80    7.80
   6   1   4   -3.40    3.70
  -7  -1  -4    1.00    3.50
  -7  -1  -4   12.00   12.00
  -7  -1  -4    5.40    9.10
   7   1   4   -3.60    3.80
  -8  -1  -4  -13.30   10.70
  -8  -1  -4   -2.50    8.00
  -8  -1  -4   -4.30    3.60
  -9  -1  -4   -1.60    4.40
  -9  -1  -4    5.10   11.50
 -10  -1  -4  -12.10    9.50
 -10  -1  -4   -4.50    4.80
 -11  -1  -4   -3.90    5.40
 -11  -1  -4   -4.40   10.80
 -12  -1  -4   -2.60   11.70
 -12  -1  -4    0.90    5.90
 -13  -1  -4   -0.50    5.70
 -13  -1  -4   12.30   13.70
 -14  -1  -4   10.50    7.10
 -14  -1  -4   -7.30   14.60
 -15  -1  -4   21.30    9.80
 -15  -1  -4   -5.80   28.80
 -16  -1  -4   16.60    9.00
 -16  -1  -4   13.50   18.10
 -17  -1  -4   -0.90   18.00
 -17  -1  -4   24.80    9.90
  17  -2  -4   23.90   20.20
 -17   2   4   26.00   14.90
 -17   2   4   47.80   22.70
  16  -2  -4   15.10   14.30
 -16   2   4   40.90   22.40
 -16   2   4   15.60   11.60
  15  -2  -4    9.20   10.70
 -15   2   4   12.80    8.90
 -15   2   4   -0.40   14.50
 -14   2   4   65.39   21.50
 -14   2   4   26.60   26.00
 -13   2   4  101.29   37.50
 -13   2   4   87.49   42.60
 -12   2   4   82.99   32.20
 -12   2   4   82.49   38.20
 -11   2   4  213.98   82.09
 -11   2   4  246.58   87.19
 -10   2   4   52.99   23.60
 -10   2   4   41.80   17.70
   9  -2  -4  208.08   66.59
  -9   2   4  150.88   62.49
  -9   2   4  181.18   66.29
   8  -2  -4  118.49   38.40
  -8   2   4   91.09   33.80
  -8   2   4   68.99   30.50
   7  -2  -4  111.09   32.90
  -7   2   4   53.19   23.90
  -7   2   4   66.79   27.80
   6  -2  -4  191.18   61.29
   6  -2  -4  145.29   59.49
  -6   2   4  148.89   58.69
  -6   2   4  162.78   59.89
   5  -2  -4  170.18   76.89
   5  -2  -4  184.08   67.89
  -5   2   4  243.88   70.79
  -5   2   4  161.78   67.79
  -5   2   4  178.58   68.59
   4  -2  -4  757.52  246.68
   4  -2  -4  637.04  245.48
   4  -2  -4  637.64  245.78
  -4   2   4  728.43  246.48
  -4   2   4  613.94  245.38
  -4   2   4  638.74  245.78
   3  -2  -4  221.78   85.09
   3  -2  -4  230.98   84.99
   3  -2  -4  244.48   86.59
  -3   2   4  243.48   84.89
  -3   2   4  212.68   84.99
   2  -2  -4  137.09   49.20
   2  -2  -4  158.38   51.19
   2  -2  -4  129.29   48.90
  -2   2   4  115.49   48.90
  -2   2   4  134.09   49.10
  -2   2   4  148.99   50.69
   1  -2  -4  109.49   42.50
   1  -2  -4  120.59   44.00
  -1   2   4  116.79   42.40
  -1   2   4  107.09   43.50
   0  -2  -4   79.89   31.00
   0  -2  -4   74.79   28.80
   0   2   4   77.29   28.70
   0   2   4   73.39   29.50
  -1  -2  -4  110.49   42.50
  -1  -2  -4  109.09   42.60
  -1  -2  -4  101.99   42.20
   1   2   4  105.19   42.40
   1   2   4  112.79   42.10
   1   2   4  145.09   43.00
  -2  -2  -4  125.49   49.20
  -2  -2  -4  124.69   49.99
  -2  -2  -4  149.99   49.50
   2   2   4  129.89   49.80
   2   2   4  137.89   49.60
   2   2   4  129.89   49.20
  -3  -2  -4  220.18   82.19
  -3  -2  -4  237.78   83.09
  -3  -2  -4  209.88   82.39
   3   2   4  222.78   83.19
   3   2   4  224.88   82.49
  -4  -2  -4  661.63  244.98
  -4  -2  -4  642.24  245.88
  -4  -2  -4  633.24  245.08
   4   2   4  669.13  245.78
   4   2   4  708.23  245.28
  -5  -2  -4  188.38   70.99
  -5  -2  -4  189.48   71.59
  -5  -2  -4  184.38   71.09
  -5  -2  -4  189.68   72.49
   5   2   4  207.78   71.39
  -6  -2  -4  152.48   61.89
  -6  -2  -4  170.08   62.69
  -6  -2  -4  180.98   63.79
   6   2   4  174.68   62.29
  -7  -2  -4  111.09   35.00
  -7  -2  -4   92.99   35.40
  -7  -2  -4   69.99   31.40
  -8  -2  -4   84.69   32.80
  -8  -2  -4  111.59   43.50
  -8  -2  -4   78.79   36.10
  -9  -2  -4  111.99   51.29
  -9  -2  -4  184.58   54.79
  -9  -2  -4  126.89   48.20
 -10  -2  -4   28.70   12.50
 -10  -2  -4   46.50   20.30
 -10  -2  -4    3.30   29.10
 -11  -2  -4  219.58   77.69
 -11  -2  -4  182.38   71.89
 -12  -2  -4   53.49   21.40
 -13  -2  -4   93.99   43.00
 -13  -2  -4   93.49   36.20
 -14  -2  -4   30.90   14.60
 -14  -2  -4   55.19   26.20
 -15  -2  -4   -6.50   16.90
 -15  -2  -4   14.40    7.30
 -16  -2  -4   25.90   10.10
 -16  -2  -4   -6.80   21.20
 -17  -2  -4   54.09   17.10
 -17  -2  -4    0.90   23.80
  17  -3  -4   29.30   16.50
 -17   3   4  -18.40   15.60
 -17   3   4   -9.40    8.70
  16  -3  -4   -4.20   12.10
 -16   3   4   -5.30    9.00
 -16   3   4   17.90   14.50
  15  -3  -4   12.20   11.20
 -15   3   4  -12.00    7.10
 -15   3   4  -21.10   10.70
  14  -3  -4   18.60   14.10
 -14   3   4   -5.40   11.90
 -14   3   4    6.40    8.00
  13  -3  -4   -6.40    8.70
 -13   3   4    2.60    6.90
  12  -3  -4  -10.40    6.60
 -12   3   4   -9.30   11.20
 -12   3   4   -8.40    5.60
  11  -3  -4   -0.90    7.20
 -11   3   4  -13.50   10.10
 -11   3   4    2.90    5.60
  10  -3  -4   -5.00    6.60
 -10   3   4    7.20    5.40
 -10   3   4   -4.80   10.10
   9  -3  -4    3.20    5.80
   9  -3  -4  -25.60   14.80
  -9   3   4   -0.90    9.10
  -9   3   4   -2.50    4.20
   8  -3  -4   -2.90    4.50
   8  -3  -4   13.00   17.80
  -8   3   4    5.10    8.90
  -8   3   4   -4.20    4.00
   7  -3  -4   -5.20   13.60
   7  -3  -4    7.50    5.60
  -7   3   4   -1.30    3.90
  -7   3   4   -5.20    6.30
   6  -3  -4   -0.90    4.80
   6  -3  -4    0.60   14.70
   6  -3  -4    5.50    5.90
  -6   3   4    7.70    7.00
  -6   3   4    0.70    4.30
   5  -3  -4    4.30   16.00
   5  -3  -4   -3.20    5.20
   5  -3  -4    2.90    5.10
  -5   3   4  -12.20    4.20
  -5   3   4    1.90    5.90
   4  -3  -4   10.80   25.30
   4  -3  -4   -5.80    4.80
   4  -3  -4   -4.70    4.40
  -4   3   4   -0.90    4.20
  -4   3   4    0.60   16.90
  -4   3   4   -3.30    5.20
   3  -3  -4   -0.50    5.40
   3  -3  -4    3.10    4.30
   3  -3  -4   -2.10   13.60
  -3   3   4    0.50   16.10
  -3   3   4    3.10    4.20
   2  -3  -4   22.80   16.60
  -2   3   4    0.80    5.60
  -2   3   4   15.70   21.20
   1  -3  -4   -6.60    5.10
   1  -3  -4    2.50   15.90
  -1   3   4    0.70   14.20
  -1   3   4   -0.30    4.70
   0  -3  -4  -23.30   12.60
   0  -3  -4    0.40    5.40
   0  -3  -4   -1.80    4.10
   0   3   4    3.10    5.10
   0   3   4   -5.70   12.60
  -1  -3  -4   -1.00    5.30
  -1  -3  -4   -4.60    4.90
  -1  -3  -4   -2.60   11.80
   1   3   4    0.60    5.10
   1   3   4   -8.50   10.00
   1   3   4   -0.90    2.90
   1   3   4    2.70    4.80
  -2  -3  -4    1.10    9.10
  -2  -3  -4   -3.60    3.20
  -2  -3  -4   -4.60    6.00
  -2  -3  -4   -1.10    5.30
   2   3   4   -1.70    5.70
   2   3   4   -1.30    3.30
   2   3   4    7.80    8.10
   2   3   4    2.80    5.20
  -3  -3  -4    1.60    5.40
  -3  -3  -4   -5.60    3.50
  -3  -3  -4    6.10    7.00
   3   3   4    4.00    6.10
   3   3   4    1.80    5.40
   3   3   4    2.20    2.80
  -4  -3  -4   -4.90    6.70
  -4  -3  -4    4.60    4.70
  -4  -3  -4   -0.60    4.30
   4   3   4   -4.00    6.20
   4   3   4    5.70    5.50
   4   3   4   -1.90    3.20
  -5  -3  -4   -1.70    4.50
  -5  -3  -4   -4.60    3.30
  -5  -3  -4    6.60    7.90
   5   3   4   -0.70    5.40
  -6  -3  -4    0.50    2.90
  -6  -3  -4   -3.30    8.10
  -7  -3  -4    2.40    8.00
  -7  -3  -4   -6.30    2.60
  -7  -3  -4    8.20    9.40
  -8  -3  -4    2.00    3.60
  -8  -3  -4    0.80    8.90
  -8  -3  -4   -1.10   11.20
  -9  -3  -4   -3.80    3.50
  -9  -3  -4   15.20   12.20
  -9  -3  -4   -9.00    9.00
 -10  -3  -4   -8.10    3.70
 -10  -3  -4   -3.90    9.90
 -11  -3  -4    1.30    4.10
 -11  -3  -4   17.10   16.70
 -11  -3  -4  -10.40    9.80
 -12  -3  -4   -6.60    4.10
 -12  -3  -4   14.90   13.70
 -12  -3  -4   12.00   25.20
 -13  -3  -4   -0.60    4.30
 -13  -3  -4    3.20   15.80
 -14  -3  -4   -4.10    4.60
 -14  -3  -4    3.80   15.10
 -15  -3  -4   18.00    8.50
 -15  -3  -4   -2.80   18.50
 -16  -3  -4    8.90   20.00
 -16  -3  -4   39.50   15.20
 -17  -3  -4    2.10   19.90
  16  -4  -4   35.60   17.70
 -16   4   4   17.50   13.70
 -16   4   4   26.80   20.40
  15  -4  -4   32.00   17.90
 -15   4   4   37.80   15.40
 -15   4   4   22.20   19.40
  14  -4  -4    5.80   11.60
 -14   4   4   -6.10    6.90
 -14   4   4    5.00   13.20
  13  -4  -4    8.00   12.20
 -13   4   4   13.50    9.20
 -13   4   4   34.00   18.20
  12  -4  -4  199.08   88.59
 -12   4   4  294.17   93.49
 -12   4   4  250.27   88.09
  11  -4  -4  115.79   42.20
 -11   4   4  103.29   44.00
 -11   4   4  100.69   40.50
  10  -4  -4  152.38   60.69
 -10   4   4  191.28   62.69
 -10   4   4  151.28   60.09
   9  -4  -4  134.19   40.70
   9  -4  -4  158.48   49.20
  -9   4   4   93.79   41.90
  -9   4   4   77.89   39.00
   8  -4  -4  139.39   54.09
  -8   4   4  129.59   53.79
  -8   4   4  168.18   55.29
   7  -4  -4  117.89   39.90
   7  -4  -4   62.99   31.60
  -7   4   4  101.19   33.00
  -7   4   4   72.59   31.30
   6  -4  -4   38.70   22.40
   6  -4  -4   42.30   13.80
  -6   4   4   21.20   12.30
  -6   4   4   26.60   13.70
   5  -4  -4   50.49   21.70
   5  -4  -4   68.99   28.10
  -5   4   4   56.29   21.20
  -5   4   4   48.40   21.40
   4  -4  -4    7.10    7.30
   4  -4  -4    6.60   16.60
  -4   4   4   19.10    6.90
  -4   4   4    8.00    6.30
   3  -4  -4   95.39   36.00
  -3   4   4   91.19   35.30
   2  -4  -4  352.06  133.19
   2  -4  -4  360.66  132.19
  -2   4   4  344.57  132.09
  -2   4   4  366.86  133.09
   1  -4  -4  146.19   56.39
   1  -4  -4  150.58   55.29
  -1   4   4  143.99   55.09
   0  -4  -4   52.59   20.90
   0  -4  -4   72.09   26.10
   0  -4  -4   44.40   21.70
   0   4   4   47.40   20.70
   0   4   4  100.19   26.50
   0   4   4   50.59   21.60
  -1  -4  -4  149.49   54.59
  -1  -4  -4  137.49   54.59
  -1  -4  -4  168.58   55.49
   1   4   4  120.69   53.99
   1   4   4  143.69   54.49
   1   4   4  158.88   54.49
   1   4   4  150.28   55.09
  -2  -4  -4  383.76  132.79
  -2  -4  -4  339.77  132.79
  -2  -4  -4  321.07  132.49
  -2  -4  -4  369.06  133.09
   2   4   4  338.87  132.39
   2   4   4  354.36  132.89
   2   4   4  339.07  132.79
   2   4   4  398.76  132.79
  -3  -4  -4  116.19   35.10
  -3  -4  -4   93.59   32.80
   3   4   4   64.49   32.40
   3   4   4  117.79   34.70
   3   4   4  133.39   34.20
   3   4   4   86.49   32.20
  -4  -4  -4    2.10    4.70
  -4  -4  -4    1.70    8.80
  -4  -4  -4   14.70    6.40
  -5  -4  -4   55.39   23.40
  -5  -4  -4   71.79   24.20
  -5  -4  -4   54.69   25.80
  -6  -4  -4   18.20   15.90
  -6  -4  -4   32.10   13.60
  -6  -4  -4   38.70   13.20
  -7  -4  -4  106.69   38.30
  -7  -4  -4   91.29   37.60
  -7  -4  -4  107.39   41.70
  -8  -4  -4  198.78   58.19
  -8  -4  -4  130.69   54.89
  -9  -4  -4  106.89   43.20
  -9  -4  -4   96.59   37.60
 -10  -4  -4  127.99   51.49
 -10  -4  -4  197.68   59.89
 -11  -4  -4  111.79   42.00
 -11  -4  -4   87.09   35.70
 -12  -4  -4  185.28   73.39
 -12  -4  -4  259.07   82.09
 -13  -4  -4    0.80    5.20
 -13  -4  -4    5.80   17.60
 -14  -4  -4    0.60    5.50
 -14  -4  -4   16.50   19.10
 -15  -4  -4   29.50   13.10
 -15  -4  -4   23.90   23.40
 -16  -4  -4   53.39   28.00
 -16  -4  -4   36.20   17.50
  16  -5  -4   71.49   19.50
 -16   5   4   -4.20   14.00
  15  -5  -4   21.00   14.00
 -15   5   4    3.00    9.70
 -15   5   4   17.00   16.90
  14  -5  -4   34.00   12.70
 -14   5   4   -2.50    8.30
 -14   5   4  -31.20   13.10
  13  -5  -4  -15.30    8.50
 -13   5   4    0.00    7.70
 -13   5   4   -0.50   12.20
  12  -5  -4   11.30   10.10
 -12   5   4    5.90    7.30
 -12   5   4    5.00   13.80
  11  -5  -4    2.60    8.50
 -11   5   4    1.00    6.00
 -11   5   4    1.70   12.70
  10  -5  -4    4.00    8.30
 -10   5   4   -7.70    5.00
 -10   5   4   -3.30   10.90
   9  -5  -4   -7.80   19.70
   9  -5  -4   -3.60    7.00
  -9   5   4   -1.50    8.70
  -9   5   4   -5.00    5.70
   8  -5  -4    0.30    7.00
   8  -5  -4   -3.80   17.70
  -8   5   4    2.20    6.00
  -8   5   4   10.70    9.60
   7  -5  -4    4.50    7.10
   7  -5  -4    3.10   17.70
  -7   5   4    1.10    5.40
  -7   5   4    6.50    7.90
   6  -5  -4   -4.70   15.30
   6  -5  -4    0.70    5.90
  -6   5   4   -4.90    5.60
  -6   5   4   -5.00    4.70
   5  -5  -4   -5.40   13.90
   5  -5  -4   -7.70    5.80
  -5   5   4  -10.00    4.30
  -5   5   4   -0.70    5.20
   4  -5  -4  -12.70   13.50
   3  -5  -4    3.60   16.60
   3  -5  -4    0.40    6.10
   2  -5  -4    0.00    6.10
   2  -5  -4   11.60   26.50
  -2   5   4    2.60    6.00
   1  -5  -4   12.60   14.30
   1  -5  -4   -3.00    5.80
  -1   5   4    8.00   15.60
  -1   5   4   -3.70    4.70
   0  -5  -4   -3.40    6.10
   0  -5  -4    2.20   12.80
   0  -5  -4   -6.70    4.00
   0   5   4   -0.50    4.20
   0   5   4    7.40   19.50
   0   5   4    2.30    5.80
  -1  -5  -4  -19.70   11.10
  -1  -5  -4   -8.90    5.30
  -1  -5  -4    7.80    6.80
   1   5   4    7.10   12.30
   1   5   4   -0.20    4.90
  -2  -5  -4   -8.40    9.30
  -2  -5  -4    1.60    6.50
  -2  -5  -4   -5.40    6.40
   2   5   4    4.30    9.80
   2   5   4    6.40    7.10
  -3  -5  -4   -6.80    6.30
  -3  -5  -4    0.90    4.30
  -3  -5  -4    7.50    6.10
  -3  -5  -4    5.40    8.70
   3   5   4    1.40    6.20
   3   5   4    0.50    8.10
  -4  -5  -4   -2.90    3.80
  -4  -5  -4   -1.10    5.60
  -4  -5  -4   -7.50    6.90
  -5  -5  -4    2.50    4.30
  -5  -5  -4    1.20    5.50
  -5  -5  -4    4.20    8.50
  -6  -5  -4   -9.40    4.20
  -6  -5  -4   -9.80    3.40
  -6  -5  -4   -5.50    8.40
  -7  -5  -4   -8.40    3.70
  -7  -5  -4   -3.50    4.40
  -7  -5  -4   -6.40    7.70
  -8  -5  -4    8.50    5.70
  -8  -5  -4    0.60    5.10
  -8  -5  -4   -2.00    9.30
  -9  -5  -4  -11.10    4.40
  -9  -5  -4   -9.30    9.80
 -10  -5  -4    1.20   17.40
 -10  -5  -4    0.00    6.80
 -11  -5  -4    4.80   14.90
 -11  -5  -4    0.30    4.90
 -12  -5  -4    5.30    5.40
 -12  -5  -4  -13.50   13.90
 -13  -5  -4   -7.50   15.60
 -13  -5  -4    8.40    6.20
 -14  -5  -4  -10.20    4.70
 -14  -5  -4  -21.30   11.70
 -15  -5  -4   21.70   11.60
 -15  -5  -4   22.20   20.90
 -16  -5  -4    0.00   20.10
 -16  -5  -4   27.60   11.30
  16  -6  -4   17.40   20.60
 -16   6   4   20.40   15.20
 -16   6   4   53.29   21.70
  15  -6  -4   20.30   14.60
 -15   6   4    9.80   17.50
 -15   6   4   -7.80   10.00
  14  -6  -4   88.29   32.20
 -14   6   4   60.19   29.30
 -14   6   4   83.09   37.00
  13  -6  -4   54.09   19.40
 -13   6   4   30.20   20.70
 -13   6   4   29.00   16.20
  12  -6  -4   56.49   20.80
 -12   6   4   32.30   22.80
 -12   6   4   39.70   18.20
  11  -6  -4   14.60   10.90
 -11   6   4   29.70   13.50
 -11   6   4    6.60    8.70
  10  -6  -4  158.58   57.79
 -10   6   4  129.99   58.49
 -10   6   4  159.58   59.69
   9  -6  -4  180.88   68.59
  -9   6   4  187.28   69.19
  -9   6   4  175.78   68.29
   8  -6  -4  159.88   64.89
   8  -6  -4  282.07   75.99
  -8   6   4  154.48   64.19
  -8   6   4  163.48   64.29
   7  -6  -4  104.89   43.30
   7  -6  -4   99.69   34.80
  -7   6   4   92.99   34.30
  -7   6   4   64.89   33.30
   6  -6  -4   38.20   21.10
   6  -6  -4   65.69   29.70
  -6   6   4   53.39   20.40
  -6   6   4   50.39   20.60
   5  -6  -4  239.88   83.59
   5  -6  -4  199.38   80.99
  -5   6   4  217.28   80.79
   4  -6  -4  161.08   60.19
   4  -6  -4  136.09   55.69
   3  -6  -4  429.46  156.28
   3  -6  -4  410.26  157.48
   2  -6  -4   64.89   31.60
   2  -6  -4   69.89   27.60
   1  -6  -4   40.50   17.60
   0  -6  -4  194.58   76.39
   0  -6  -4  214.88   77.99
   0  -6  -4  224.98   77.09
   0   6   4  199.38   76.39
   0   6   4  209.18   77.69
  -1  -6  -4   38.10   21.10
  -1  -6  -4   35.50   16.90
  -1  -6  -4   56.99   18.20
   1   6   4   41.00   16.90
   1   6   4   24.80   25.60
  -2  -6  -4   78.79   33.70
  -2  -6  -4   80.89   33.30
  -2  -6  -4  105.39   35.50
   2   6   4   77.19   33.20
   2   6   4   85.79   34.30
  -3  -6  -4  403.36  153.78
  -3  -6  -4  411.46  154.18
   3   6   4  410.06  153.48
   3   6   4  442.06  155.08
  -4  -6  -4   94.39   40.20
  -4  -6  -4  117.19   41.30
  -4  -6  -4  112.39   42.30
  -5  -6  -4  230.28   80.69
  -5  -6  -4  205.88   79.19
  -5  -6  -4  207.88   79.39
  -6  -6  -4   53.09   24.20
  -6  -6  -4   65.09   22.00
  -6  -6  -4   43.80   20.40
  -7  -6  -4  112.69   39.50
  -7  -6  -4   82.99   34.50
  -7  -6  -4   87.99   35.30
  -8  -6  -4  128.79   53.79
  -8  -6  -4  149.19   58.19
  -8  -6  -4  151.28   53.79
  -9  -6  -4  186.68   72.29
  -9  -6  -4  199.48   72.49
 -10  -6  -4  133.09   53.69
 -10  -6  -4  185.78   61.09
 -11  -6  -4   18.10   11.00
 -11  -6  -4   46.80   22.30
 -12  -6  -4   82.69   40.20
 -13  -6  -4   28.60   15.10
 -13  -6  -4   61.59   26.90
 -14  -6  -4   55.69   25.50
 -14  -6  -4   93.39   36.50
 -15  -6  -4   25.50   12.10
 -15  -6  -4   24.70   22.90
 -16  -6  -4   54.39   20.10
 -16  -6  -4   28.00   28.20
  15  -7  -4   -8.40   12.90
 -15   7   4   30.00   16.40
  14  -7  -4   16.40   12.90
 -14   7   4   16.30   15.20
 -14   7   4    5.10   10.40
  13  -7  -4   -4.40   11.70
 -13   7   4   13.00    9.90
 -13   7   4   31.60   15.00
  12  -7  -4   -6.50    9.10
 -12   7   4   10.40    8.10
 -12   7   4   10.50   12.10
  11  -7  -4    5.80    8.60
 -11   7   4   -4.70    9.80
 -11   7   4    8.90    7.60
  10  -7  -4   -6.40    7.10
 -10   7   4   12.60   10.90
 -10   7   4   -0.20    6.70
   9  -7  -4    1.50    8.30
  -9   7   4   -6.50   10.30
  -9   7   4   27.30   11.40
   8  -7  -4    1.30    7.80
  -8   7   4   -0.40    6.60
  -8   7   4   -2.50    7.20
   7  -7  -4    0.70   17.30
   7  -7  -4   -3.00    7.70
  -7   7   4    3.70    6.00
  -7   7   4  -11.10    5.80
   6  -7  -4   11.60    8.70
   6  -7  -4    9.20   19.00
  -6   7   4    2.50    6.70
   5  -7  -4    4.40    7.30
   5  -7  -4    9.90   17.50
  -5   7   4   -5.20    5.00
   4  -7  -4   19.10   17.70
   4  -7  -4    0.80    6.50
   3  -7  -4   -1.00   16.40
   3  -7  -4   -2.40    7.20
   2  -7  -4   -2.40    6.10
   2  -7  -4    2.80   15.50
   1  -7  -4  -13.40   13.80
   1  -7  -4    6.40    7.50
   0  -7  -4   -5.50    6.20
   0  -7  -4    2.30    5.00
   0  -7  -4    1.80   14.80
   0   7   4   -1.30    4.10
  -1  -7  -4  -17.30   12.10
  -1  -7  -4    2.80    7.10
  -1  -7  -4    3.20    6.00
   1   7   4    3.00    5.50
   1   7   4    5.50   15.10
  -2  -7  -4    4.80    7.20
  -2  -7  -4   -2.20    6.20
   2   7   4   -7.50   12.80
   2   7   4    7.40    6.20
  -3  -7  -4    1.50    6.80
  -3  -7  -4   -8.80   11.40
   3   7   4   -1.10    8.60
  -4  -7  -4   -1.00    8.40
  -4  -7  -4    1.40    6.30
  -5  -7  -4   -9.00    4.70
  -5  -7  -4    1.30    6.40
  -5  -7  -4    5.70    9.90
  -6  -7  -4   -0.20    5.50
  -6  -7  -4   -2.60    9.90
  -6  -7  -4    3.70    6.60
  -7  -7  -4    5.00   11.90
  -7  -7  -4   -9.60    4.50
  -7  -7  -4   -2.60    6.50
  -8  -7  -4    1.30    6.80
  -8  -7  -4  -13.20    4.00
  -8  -7  -4    2.10   12.90
  -9  -7  -4   17.50   16.90
  -9  -7  -4    0.10    5.70
  -9  -7  -4   -6.10    5.00
 -10  -7  -4   -2.30   16.30
 -10  -7  -4   -3.10    5.00
 -11  -7  -4   -5.30    5.50
 -11  -7  -4   -0.20   14.90
 -12  -7  -4   -9.20    5.00
 -12  -7  -4   -6.00   14.50
 -13  -7  -4    3.90    6.50
 -13  -7  -4   -4.00   15.70
 -14  -7  -4   15.20   19.50
 -14  -7  -4   -0.70    6.30
 -15  -7  -4   -3.00   18.70
 -15  -7  -4    7.00    6.80
  15  -8  -4   23.40   16.70
 -15   8   4    7.00   10.50
 -15   8   4   -8.20   15.00
  14  -8  -4   88.69   35.30
 -14   8   4  103.09   36.40
 -14   8   4   61.29   32.20
  13  -8  -4   25.90   18.20
 -13   8   4   37.40   18.50
 -13   8   4   33.70   15.60
 -12   8   4   -7.70    8.80
 -12   8   4   14.20    9.20
  11  -8  -4    7.20   11.50
 -11   8   4   21.20   11.50
 -11   8   4    6.10    9.30
  10  -8  -4   15.90   10.20
 -10   8   4   -5.70    7.50
   9  -8  -4   43.30   18.40
  -9   8   4   21.00   16.50
  -9   8   4   41.70   16.50
   8  -8  -4   11.20   12.80
  -8   8   4   27.30   11.20
   7  -8  -4    9.40    9.90
  -7   8   4   11.70    8.80
   6  -8  -4   68.89   30.10
  -6   8   4   74.29   28.90
   5  -8  -4  159.28   64.19
   5  -8  -4  196.08   67.59
  -5   8   4  162.48   63.79
   4  -8  -4  159.28   72.79
   4  -8  -4  253.87   79.59
   3  -8  -4   76.69   30.30
   3  -8  -4   38.70   21.50
   2  -8  -4  124.09   61.59
   2  -8  -4  241.98   68.09
   1  -8  -4  138.59   53.39
   1  -8  -4  134.79   56.69
   0  -8  -4   38.40   17.30
   0  -8  -4   45.80   19.60
   0   8   4   45.10   17.50
  -1  -8  -4  117.99   42.30
  -1  -8  -4  126.79   41.60
   1   8   4   91.49   40.40
  -2  -8  -4  138.79   47.40
  -2  -8  -4  123.59   47.10
   2   8   4  112.89   46.70
   2   8   4  117.39   46.20
  -3  -8  -4   36.90   18.40
  -3  -8  -4   48.40   19.90
   3   8   4   40.50   20.30
  -4  -8  -4  138.79   57.39
  -4  -8  -4  176.68   59.99
  -5  -8  -4  214.18   69.29
  -5  -8  -4  159.08   65.79
  -6  -8  -4   76.69   34.70
  -6  -8  -4   82.89   32.40
  -7  -8  -4    7.90   13.80
  -7  -8  -4    5.10    8.00
  -7  -8  -4    9.30    6.60
  -8  -8  -4    5.40    6.40
  -8  -8  -4   22.10   16.10
  -8  -8  -4   -3.00    6.10
  -9  -8  -4   29.50   13.40
  -9  -8  -4   32.00   19.70
  -9  -8  -4   23.10   12.60
 -10  -8  -4    2.20    8.60
 -10  -8  -4   24.90   19.10
 -10  -8  -4   18.20    9.30
 -11  -8  -4   19.30   19.90
 -11  -8  -4   21.20   10.90
 -12  -8  -4    7.30    7.20
 -12  -8  -4    7.80   17.60
 -13  -8  -4   14.30   19.80
 -13  -8  -4   11.80    8.80
 -14  -8  -4   85.49   33.60
 -14  -8  -4   81.79   48.70
 -15  -8  -4   11.20    8.70
 -15  -8  -4  -10.10   15.20
  14  -9  -4   24.00   15.10
 -14   9   4   -3.80    9.00
 -14   9   4   24.30   13.00
  13  -9  -4   -7.70   10.30
 -13   9   4  -11.70    6.80
 -13   9   4   10.60   11.20
  12  -9  -4   24.60   12.60
 -12   9   4   -5.60    7.90
 -12   9   4   16.90   10.70
 -11   9   4   -4.80    7.90
  10  -9  -4  -27.30    9.50
 -10   9   4    4.30    8.60
   9  -9  -4  -10.90    8.30
  -9   9   4   -2.70    7.50
   8  -9  -4   -5.10   10.10
  -8   9   4    5.80    8.10
   7  -9  -4  -13.10    8.60
  -7   9   4   -8.20    6.90
   6  -9  -4   17.80   13.90
  -6   9   4   22.40   11.30
   5  -9  -4    4.70    9.10
   4  -9  -4   23.20   13.90
   3  -9  -4   -3.70    8.70
   2  -9  -4   10.00   10.90
   1  -9  -4   -3.50    8.50
   0  -9  -4    1.20    8.40
   0  -9  -4   -2.70    5.20
   0   9   4    2.40    5.60
  -1  -9  -4    0.00    6.90
  -1  -9  -4  -12.00    7.00
   1   9   4    6.00    6.40
  -2  -9  -4    9.30    8.20
  -2  -9  -4    0.10    8.30
  -3  -9  -4   -6.60    8.10
  -3  -9  -4    5.20    9.00
   3   9   4   10.80   12.90
  -4  -9  -4    6.40    9.30
  -4  -9  -4   -1.40    7.90
  -5  -9  -4    2.80   10.30
  -5  -9  -4  -11.90    6.40
  -6  -9  -4   -8.20    6.90
  -6  -9  -4   12.10   12.50
  -7  -9  -4  -11.10   10.00
  -7  -9  -4    5.40    7.40
  -8  -9  -4    3.00    7.60
  -8  -9  -4    1.70   12.70
  -9  -9  -4   10.60   15.80
  -9  -9  -4   13.70    7.30
  -9  -9  -4   -6.10    5.90
 -10  -9  -4   -0.10    6.40
 -10  -9  -4    2.90    6.70
 -10  -9  -4   33.20   18.00
 -11  -9  -4    1.30   15.70
 -11  -9  -4   -0.10    6.40
 -12  -9  -4    2.80   16.30
 -12  -9  -4   -1.30    7.30
 -13  -9  -4   16.50   20.10
 -13  -9  -4    3.90    8.10
 -14  -9  -4    9.30    8.00
 -14  -9  -4    4.90   18.50
  14 -10  -4   25.00   17.10
 -14  10   4    5.50   10.20
  13 -10  -4    1.50   14.50
 -13  10   4   10.20   11.60
  12 -10  -4   34.50   15.30
 -12  10   4    7.80   11.20
  11 -10  -4    8.80   13.70
 -11  10   4    1.30    8.30
  10 -10  -4   21.80   13.30
 -10  10   4   12.30   10.80
   9 -10  -4   33.50   16.50
  -9  10   4   22.20   14.40
   8 -10  -4   25.30   13.20
  -8  10   4    4.60    9.60
   7 -10  -4   25.50   14.10
  -7  10   4    8.80   10.30
   6 -10  -4   25.20   15.20
  -6  10   4   25.10   13.10
   5 -10  -4   38.70   19.30
   4 -10  -4   18.90   13.90
   3 -10  -4   38.40   19.50
   2 -10  -4   29.90   17.00
   1 -10  -4  136.19   54.59
   0 -10  -4    6.20   10.20
   0 -10  -4    4.80    7.60
   0  10   4   14.90    7.80
  -1 -10  -4  123.29   46.50
  -1 -10  -4  119.59   48.50
   1  10   4  120.39   46.40
  -2 -10  -4   17.00   11.10
  -2 -10  -4    0.80    9.30
  -3 -10  -4   44.90   30.50
  -3 -10  -4   83.09   32.40
   3  10   4  152.58   42.20
  -4 -10  -4    5.00   10.20
  -4 -10  -4   23.50   13.70
  -5 -10  -4   60.29   25.90
  -5 -10  -4   59.29   28.00
  -6 -10  -4   16.60   16.30
  -6 -10  -4   28.50   13.80
  -7 -10  -4   48.30   23.90
  -7 -10  -4   69.29   28.10
  -8 -10  -4    3.10   13.70
  -8 -10  -4    4.70    7.40
  -9 -10  -4   40.30   18.90
  -9 -10  -4   38.60   23.70
 -10 -10  -4   25.50   12.20
 -10 -10  -4   10.90   17.20
 -11 -10  -4   18.90   19.50
 -12 -10  -4    0.20   17.70
 -12 -10  -4   30.00   11.30
 -13 -10  -4   -4.20   17.70
 -13 -10  -4    0.20    7.10
 -14 -10  -4   18.50   12.00
 -14 -10  -4   36.60   24.30
  13 -11  -4   22.70   18.10
 -13  11   4   -1.10    8.40
  12 -11  -4   10.20   14.50
 -12  11   4   20.70   17.70
  11 -11  -4   -9.60   11.40
 -11  11   4    6.70    8.70
  10 -11  -4   -9.30   10.70
 -10  11   4   -9.80    7.90
   9 -11  -4   12.00   11.60
  -9  11   4    5.30    9.60
   8 -11  -4   11.50   12.40
  -8  11   4   10.70   10.10
   7 -11  -4    4.40   12.40
  -7  11   4    3.20    9.00
   6 -11  -4   23.00   13.60
  -6  11   4   10.00   10.60
   5 -11  -4   10.90   13.20
   4 -11  -4    2.00   11.80
   3 -11  -4   17.00   13.50
   2 -11  -4   -3.00   10.60
   1 -11  -4    9.60   12.10
   0 -11  -4    2.90    5.70
   0 -11  -4   -2.10   10.80
  -1 -11  -4   -8.50    6.90
  -1 -11  -4   -3.80    9.70
   1  11   4   31.90   12.20
  -2 -11  -4  -13.60    8.30
  -2 -11  -4   -2.50    8.20
  -3 -11  -4    8.00    9.90
  -3 -11  -4    1.50   10.70
  -4 -11  -4  -11.60    8.40
  -4 -11  -4   21.10   11.00
   4  11   4   10.60   14.30
  -5 -11  -4   -2.40   12.00
  -5 -11  -4   -0.60    8.50
  -6 -11  -4   -0.90    7.70
  -6 -11  -4   -4.30   10.50
  -7 -11  -4  -13.90   14.10
  -7 -11  -4    0.20    8.00
  -8 -11  -4  -18.80   12.30
  -8 -11  -4   -8.40    6.30
  -9 -11  -4   27.40   18.90
  -9 -11  -4    4.30    9.30
 -10 -11  -4   -4.50   15.30
 -10 -11  -4   -1.50    7.10
 -11 -11  -4    1.60    7.60
 -11 -11  -4    0.60   15.50
 -12 -11  -4   -8.30   14.60
 -13 -11  -4  -15.30   14.70
  12 -12  -4    5.60   16.30
 -12  12   4   14.80   10.70
  11 -12  -4   -1.10   12.60
 -11  12   4    2.20    8.70
  10 -12  -4    5.40   14.10
 -10  12   4    7.50   10.30
   9 -12  -4  105.39   34.10
  -9  12   4   56.29   29.60
   8 -12  -4   55.79   22.90
  -8  12   4   32.50   19.60
   7 -12  -4    0.60   10.70
  -7  12   4   10.90    9.00
   6 -12  -4   21.10   14.90
  -6  12   4    1.40    8.40
   5 -12  -4   14.80   15.20
   4 -12  -4   31.00   18.20
   3 -12  -4   -2.00   12.20
   2 -12  -4   74.29   32.70
   1 -12  -4  113.99   46.60
   0 -12  -4   19.40   13.90
   0 -12  -4   10.10    8.10
  -1 -12  -4   82.49   35.50
  -2 -12  -4   20.80   19.10
  -2 -12  -4   49.99   19.60
  -3 -12  -4   -7.70   10.10
  -3 -12  -4   -3.80   11.50
  -4 -12  -4   20.10   11.30
  -4 -12  -4  -11.00   11.10
  -5 -12  -4   37.70   17.60
  -5 -12  -4   28.60   21.10
  -6 -12  -4   17.40   12.90
  -6 -12  -4   18.00   16.90
  -7 -12  -4   15.20   18.70
  -7 -12  -4   25.40   14.00
  -8 -12  -4   15.40   12.50
  -8 -12  -4   25.30   20.00
  -9 -12  -4  121.39   52.89
 -10 -12  -4   -6.40   17.20
 -10 -12  -4   19.20   10.90
 -11 -12  -4   15.50   11.90
 -11 -12  -4   11.60   18.90
 -12 -12  -4   43.90   27.90
  11 -13  -4   28.40   20.50
 -11  13   4   26.50   15.20
  10 -13  -4   -2.80   13.80
 -10  13   4   -5.60    7.80
   9 -13  -4   20.00   15.70
  -9  13   4    7.80   11.80
   8 -13  -4  -27.10   10.40
  -8  13   4    6.90    9.30
   7 -13  -4   23.90   13.80
  -7  13   4    4.10    9.50
   6 -13  -4    3.20   13.80
  -6  13   4   18.40   11.50
   5 -13  -4  -14.40   11.20
   4 -13  -4   -9.20   12.30
   3 -13  -4   -7.30   12.80
   2 -13  -4   -4.50   12.30
   1 -13  -4    7.80   12.30
   0 -13  -4   -2.60   11.40
  -1 -13  -4   -7.10   12.50
  -2 -13  -4   10.10   11.60
  -2 -13  -4   -8.80    8.80
  -3 -13  -4    9.50   11.90
  -3 -13  -4   -2.70    9.90
  -4 -13  -4    7.90   10.30
  -4 -13  -4   -5.30   11.20
  -5 -13  -4    3.80   10.60
  -5 -13  -4  -24.00   11.50
  -6 -13  -4   11.30   25.20
  -6 -13  -4  -15.00    7.90
  -7 -13  -4   -5.80    8.20
  -7 -13  -4   -3.70   14.10
  -8 -13  -4   15.20   16.10
  -8 -13  -4    4.00    8.70
  -9 -13  -4    0.00   17.20
  -9 -13  -4   -4.00    7.70
 -10 -13  -4   17.20   20.60
 -10 -13  -4    7.60   10.00
 -11 -13  -4   -5.30    8.00
  10 -14  -4   47.60   20.40
 -10  14   4   14.30   13.10
   9 -14  -4   30.90   16.90
  -9  14   4    0.60    9.80
   8 -14  -4   11.00   13.80
  -8  14   4    5.40   10.70
   7 -14  -4    9.70   14.70
  -7  14   4    1.70    8.80
   6 -14  -4   19.50   17.10
  -6  14   4   22.50   14.30
   5 -14  -4    7.10   14.60
   4 -14  -4    8.70   15.20
   3 -14  -4    4.50   13.10
   2 -14  -4   -0.50   13.70
   1 -14  -4   37.00   20.70
   0 -14  -4   23.10   17.20
  -1 -14  -4   34.70   19.30
  -2 -14  -4    0.30   10.40
  -2 -14  -4   10.10   12.50
  -3 -14  -4   40.80   22.20
  -3 -14  -4   48.90   23.50
  -4 -14  -4    8.50   15.70
  -4 -14  -4   24.20   14.60
  -5 -14  -4   27.60   17.60
  -5 -14  -4   11.10   14.80
  -6 -14  -4   40.90   24.10
  -6 -14  -4   36.60   19.70
  -7 -14  -4   25.90   18.50
  -7 -14  -4    1.60   11.80
  -8 -14  -4    4.80   15.20
  -9 -14  -4   17.10   19.70
  -9 -14  -4   17.70   12.10
 -10 -14  -4   74.69   33.00
 -10 -14  -4   61.99   29.10
   9 -15  -4   24.70   19.10
   8 -15  -4   19.30   18.30
  -8  15   4   -0.20   10.40
   7 -15  -4   18.10   15.50
  -7  15   4   -4.60    8.80
   6 -15  -4    2.40   13.20
  -6  15   4   -2.00    9.70
   5 -15  -4   24.70   20.00
   4 -15  -4   15.50   18.10
   3 -15  -4   -6.20   12.80
   2 -15  -4   16.70   16.60
   1 -15  -4   -3.10   12.90
   0 -15  -4    1.40   12.70
  -1 -15  -4  -14.30   12.40
  -2 -15  -4   11.60   11.60
  -2 -15  -4   -7.70    9.40
  -3 -15  -4   -6.80   11.90
  -3 -15  -4  -12.40   12.20
  -4 -15  -4   10.50   11.70
  -4 -15  -4   14.30   16.70
  -5 -15  -4   37.90   19.80
  -6 -15  -4   14.10   16.40
  -6 -15  -4   27.70   19.80
  -7 -15  -4    4.00   12.50
  -7 -15  -4   31.60   20.00
  -8 -15  -4    7.50   11.40
  -8 -15  -4    7.10   19.60
   7 -16  -4   71.99   39.40
   6 -16  -4   -5.40   13.60
  -6  16   4   -8.30    9.70
   5 -16  -4   28.30   18.80
  -5  16   4    5.10   12.60
   4 -16  -4   -0.40   14.30
   3 -16  -4   10.60   15.50
   2 -16  -4   12.10   16.10
   1 -16  -4   26.00   19.70
   0 -16  -4  107.79   46.10
  -1 -16  -4   31.80   18.70
  -2 -16  -4   12.50   15.90
  -3 -16  -4   48.90   23.00
  -3 -16  -4    6.80   16.00
  -4 -16  -4    4.00   15.10
  -4 -16  -4   -3.20   12.20
  -5 -16  -4   14.30   17.20
  -5 -16  -4   -7.90   10.80
  -6 -16  -4    7.80   19.80
  -6 -16  -4    6.90   12.00
  -7 -16  -4  -19.20   19.00
  -7 -16  -4   -1.00    9.00
   4 -17  -4  -16.30   14.90
   3 -17  -4  -12.30   14.70
   2 -17  -4    3.60   15.70
   1 -17  -4   -1.40   14.60
   0 -17  -4   15.80   16.90
  -1 -17  -4   30.50   19.50
  -2 -17  -4  -11.80   13.20
  -3 -17  -4   12.80   15.10
  -4 -17  -4  -58.89   21.10
  -4 -17  -4   31.20   15.30
  -4 -17   5  -14.70   11.90
  -3 -17   5    1.50   14.10
  -3 -17   5  -23.70   20.00
  -2 -17   5   29.70   19.00
  -1 -17   5    1.80   13.40
   0 -17   5    9.80   15.20
   2 -17   5   11.90   19.20
  -3  17  -5   -9.00   11.00
   3 -17   5   -7.50   16.30
   4 -17   5    3.80   15.30
  -6 -16   5   12.30   13.10
  -6 -16   5   19.40   21.40
  -5 -16   5   31.20   16.80
  -5 -16   5   20.40   19.20
  -4 -16   5   11.80   13.90
  -4 -16   5   22.80   19.70
  -3 -16   5  -17.10   12.10
  -3 -16   5   14.90   20.10
  -2 -16   5    9.00   17.30
  -2 -16   5   54.39   22.10
  -1 -16   5    6.80   13.20
   0 -16   5   28.30   19.40
   1 -16   5   33.80   21.40
   2 -16   5   22.90   17.20
   3 -16   5   10.50   18.00
  -4  16  -5    3.90   10.70
   4 -16   5   24.40   16.80
  -5  16  -5   19.40   16.80
   5 -16   5   47.60   20.20
  -6  16  -5   36.10   15.30
   6 -16   5    4.90   14.40
   7 -16   5   32.90   20.30
  -8 -15   5    4.70   11.00
  -8 -15   5    3.30   16.70
  -7 -15   5   -7.00    8.60
  -7 -15   5   -0.10   16.90
  -6 -15   5   16.90   18.70
  -5 -15   5   20.30   13.30
  -5 -15   5   12.40   18.90
  -4 -15   5   -9.40    9.60
  -4 -15   5   11.20   16.10
  -3 -15   5    8.80   12.20
  -3 -15   5   12.80   15.10
  -2 -15   5    7.70   12.50
  -2 -15   5   -3.60    9.20
  -1 -15   5   -7.70   11.00
   0 -15   5   -5.00   10.60
   1 -15   5   -5.50   10.60
   2 -15   5   20.20   14.80
   3 -15   5   11.80   14.20
  -4  15  -5  -26.80    7.60
   4 -15   5   17.10   14.10
   5 -15   5    7.30   13.60
  -6  15  -5    6.90   10.90
   6 -15   5   16.40   13.50
  -7  15  -5    4.30   11.40
   7 -15   5   27.10   15.80
  -8  15  -5  -17.00    8.60
   8 -15   5   20.60   19.20
  -9 -14   5   -3.30   17.30
  -9 -14   5   21.50   12.60
  -8 -14   5    5.50   17.90
  -8 -14   5    2.50   11.50
  -7 -14   5   20.70   13.50
  -7 -14   5   20.00   19.60
  -6 -14   5   46.20   24.60
  -6 -14   5   17.60   15.30
   5  14  -5   11.70   16.90
  -5 -14   5  -12.20    7.40
  -5 -14   5    8.50   16.50
  -4 -14   5   22.00   16.60
  -4 -14   5   14.30   14.20
  -3 -14   5   14.80   14.20
  -3 -14   5   11.50   13.10
  -2 -14   5   29.80   16.90
  -2 -14   5   19.80   15.30
  -1 -14   5    2.70   10.00
  -1 -14   5   10.50   11.50
   0 -14   5   62.79   28.30
   1 -14   5   16.80   14.80
   2 -14   5   20.00   16.80
   3 -14   5   35.40   19.40
  -4  14  -5   10.00   12.90
   4 -14   5   36.80   16.50
  -5  14  -5    0.50    9.70
   5 -14   5    4.20   13.30
  -6  14  -5   33.00   18.60
   6 -14   5   46.00   21.80
  -7  14  -5    7.40   14.00
   7 -14   5   32.70   16.40
  -8  14  -5    9.70   10.80
   8 -14   5   10.30   13.90
  -9  14  -5   25.50   14.80
   9 -14   5   14.70   18.70
 -10  14  -5   11.30   11.40
  10 -14   5   17.70   17.70
 -11 -13   5    5.80   20.60
 -10 -13   5   29.90   24.30
  -9 -13   5    4.30    7.50
  -9 -13   5   -3.50   15.80
  -8 -13   5   12.20    9.50
  -8 -13   5   -9.50   15.40
  -7 -13   5   12.30   15.30
  -7 -13   5   -3.20    8.20
  -6 -13   5   -1.50   10.60
  -6 -13   5   20.40   15.20
  -5 -13   5   -8.00    8.10
  -4 -13   5   11.50   14.20
  -4 -13   5    4.90   10.50
  -3 -13   5   -2.30   14.00
  -3 -13   5   -1.40   10.70
  -2 -13   5   -4.60   11.30
  -2 -13   5   14.50   11.50
  -1 -13   5    4.30   10.80
  -1 -13   5   21.20   12.40
   0 -13   5   14.10   12.30
   1 -13   5   21.50   15.00
   2 -13   5    1.00   10.80
   3 -13   5    1.10   11.70
  -4  13  -5    3.60    9.50
   4 -13   5   15.40   12.70
  -5  13  -5  -11.10    8.80
   5 -13   5    8.60   11.00
  -6  13  -5   -2.80    8.60
   6 -13   5   22.50   13.90
  -7  13  -5   16.20   11.00
   7 -13   5   -1.60   12.10
  -8  13  -5    2.60   10.50
   8 -13   5   35.60   16.00
  -9  13  -5   26.30   16.40
   9 -13   5    3.90   14.60
 -10  13  -5   20.70   12.00
  10 -13   5    2.30   15.30
 -11  13  -5   -2.10    9.30
  11 -13   5  -17.80   14.20
 -12 -12   5   18.50   22.40
 -11 -12   5    6.40   19.50
 -10 -12   5   -8.30   13.60
  -9 -12   5   15.70   18.50
  -8 -12   5   22.00   15.20
  -8 -12   5   62.19   25.60
  -7 -12   5   51.59   21.70
  -7 -12   5   19.00   14.30
  -6 -12   5   40.40   20.70
  -6 -12   5   55.89   25.90
   5  12  -5   41.20   25.20
  -5 -12   5   81.29   26.70
  -5 -12   5  105.29   32.30
  -4 -12   5   44.60   25.00
  -4 -12   5   83.49   29.80
  -3 -12   5   13.10    9.90
  -3 -12   5   -1.50   11.00
  -2 -12   5   59.79   30.40
  -2 -12   5   90.59   32.60
  -1 -12   5   59.99   23.80
  -1 -12   5   40.70   22.40
   0 -12   5    6.50    9.80
   0 -12   5    5.20   10.30
   2 -12   5   52.39   24.30
  -3  12  -5   23.10    9.90
   3 -12   5   -9.40   11.00
  -4  12  -5   44.70   26.20
   4 -12   5   98.79   29.50
  -5  12  -5   45.40   25.90
   5 -12   5   97.59   29.60
  -6  12  -5   53.09   21.50
   6 -12   5   40.90   22.10
  -7  12  -5   17.40   15.70
   7 -12   5   69.69   21.10
  -8  12  -5   36.40   20.00
   8 -12   5   49.20   21.00
  -9  12  -5   23.80   17.70
   9 -12   5   56.89   20.60
 -10  12  -5   -5.20   12.20
  10 -12   5   44.10   16.50
 -11  12  -5    6.20   10.30
  11 -12   5   32.20   15.90
 -12  12  -5   -0.40    9.10
 -13 -11   5   26.30   24.10
 -12 -11   5   12.70   18.50
 -11 -11   5    8.60   17.70
 -10 -11   5   33.80   22.60
  -9 -11   5  -13.50   11.20
  -8 -11   5   -3.00    6.90
  -8 -11   5   -7.10   12.60
  -7 -11   5    5.70    7.70
  -7 -11   5   -3.00   12.50
  -6 -11   5   -0.70   12.70
  -6 -11   5  -11.00    8.00
   5  11  -5   14.20   10.60
  -5 -11   5   -6.70   11.20
  -5 -11   5    0.90    8.60
  -4 -11   5    9.00    8.90
  -4 -11   5    2.80   11.70
  -3 -11   5    0.80   11.40
  -3 -11   5   -9.50    8.20
  -2 -11   5    4.00    9.60
  -2 -11   5    7.60   10.30
  -1 -11   5    1.90    8.80
  -1 -11   5    7.50    9.70
   0 -11   5  -11.90    7.90
   0 -11   5    6.50    8.10
   1 -11   5    4.90    9.90
  -2  11  -5    9.90    8.30
   2 -11   5    2.10    9.70
  -3  11  -5   26.30    9.70
   3 -11   5   -6.60   10.30
  -4  11  -5   18.10    7.90
  -4  11  -5    9.50    8.80
   4 -11   5  -10.20    9.00
  -5  11  -5   16.60    9.10
  -5  11  -5    4.40    8.20
   5 -11   5  -14.30    8.30
  -6  11  -5    7.50    8.40
   6 -11   5    3.10   10.20
  -7  11  -5    8.00    9.40
   7 -11   5    0.90    9.90
  -8  11  -5   11.50    8.70
  -8  11  -5  -11.20    7.60
   8 -11   5   20.40   11.00
  -9  11  -5   13.60   10.80
  -9  11  -5   -2.50    9.00
   9 -11   5    5.30   10.80
 -10  11  -5   -7.90   10.00
 -10  11  -5   -9.60    7.90
  10 -11   5  -13.50    9.90
 -11  11  -5    9.60   10.30
 -11  11  -5   13.40   13.00
  11 -11   5   28.50   14.10
 -12  11  -5    4.70   10.10
 -12  11  -5    9.90   13.80
  12 -11   5   25.10   14.80
 -13  11  -5   12.80   13.20
  13 -11   5   36.20   20.50
 -14 -10   5   26.50   25.30
 -13 -10   5   20.10   21.90
 -12 -10   5    6.60   16.50
 -11 -10   5   -4.90   14.80
 -10 -10   5   19.30   18.80
  -9 -10   5    1.40   14.20
  -8 -10   5   17.90   17.50
  -8 -10   5   14.90   10.60
  -7 -10   5   16.00   10.90
  -7 -10   5   18.40   18.20
  -6 -10   5   23.60   21.50
  -6 -10   5   60.99   20.10
   5  10  -5   49.90   29.00
  -5 -10   5   73.19   27.30
  -5 -10   5   59.19   27.80
   4  10  -5   20.00   17.10
  -4 -10   5   11.70   10.00
  -4 -10   5   11.00   12.30
  -3 -10   5   -1.30    7.60
  -3 -10   5    9.50   11.10
  -2 -10   5   47.00   20.80
  -2 -10   5   39.00   19.50
  -1 -10   5   84.09   35.90
  -1 -10   5   94.19   35.90
   0 -10   5  132.19   55.19
   0 -10   5  149.19   55.19
   1 -10   5   95.29   38.30
  -2  10  -5   57.79   23.80
   2 -10   5   54.09   24.60
  -3  10  -5   20.30   10.30
   3 -10   5    7.40   11.40
  -4  10  -5   19.10    9.40
   4 -10   5   13.60   12.00
  -5  10  -5   71.49   26.70
  -5  10  -5   42.50   26.80
   5 -10   5   88.49   28.60
  -6  10  -5   48.60   18.70
  -6  10  -5   49.30   18.70
  -6  10  -5   23.00   18.40
   6 -10   5   47.70   20.70
  -7  10  -5   43.60   17.00
  -7  10  -5   13.20   16.80
  -7  10  -5   49.80   18.60
   7 -10   5   54.29   20.00
  -8  10  -5    3.90   12.00
  -8  10  -5   46.10   14.90
   8 -10   5   30.90   14.90
  -9  10  -5   35.50   14.50
  -9  10  -5   -0.30   11.60
   9 -10   5   23.90   13.50
 -10  10  -5    6.30   12.00
  10 -10   5   38.30   15.50
 -11  10  -5    2.60    9.70
 -11  10  -5    6.70   11.90
  11 -10   5    0.40    9.00
 -12  10  -5   30.80   18.10
 -12  10  -5   12.30   12.70
  12 -10   5   29.20   14.50
 -13  10  -5   49.00   21.60
 -13  10  -5   14.10   15.80
  13 -10   5   59.59   22.40
 -14  10  -5   38.30   19.30
 -14  -9   5    2.30    9.60
 -14  -9   5   24.70   18.20
 -13  -9   5   27.30   10.30
 -13  -9   5   -6.40   13.20
 -12  -9   5    1.40   15.60
 -11  -9   5  -17.60   13.10
 -10  -9   5    2.40   13.60
  -9  -9   5    6.00   13.90
  -8  -9   5   -5.00    5.70
  -8  -9   5   -0.50   12.50
  -7  -9   5    9.40   13.50
  -7  -9   5   -9.40    5.20
  -6  -9   5    0.50    7.10
  -6  -9   5  -18.40    8.40
  -5  -9   5   -0.30    6.40
  -5  -9   5   15.90   11.60
   4   9  -5    5.50   12.10
  -4  -9   5   -1.80    8.60
  -4  -9   5  -13.30    6.10
   3   9  -5   19.50   12.90
  -3  -9   5    6.70    8.20
  -3  -9   5   -4.80    7.10
  -2  -9   5   14.50    8.10
  -2  -9   5    2.30    9.00
  -1  -9   5    1.10    9.10
  -1  -9   5   -3.60    6.90
   0  -9   5   -2.90    6.50
   0  -9   5   -3.60    7.60
  -1   9  -5    1.60    6.30
   1  -9   5   -6.10    7.00
  -2   9  -5    3.50    6.70
   2  -9   5  -10.80    7.00
  -3   9  -5   17.90    7.90
   3  -9   5   -2.10    8.20
  -4   9  -5   -0.40    6.50
  -4   9  -5   10.20    6.80
   4  -9   5   -5.00    8.00
  -5   9  -5  -17.60    5.70
  -5   9  -5    1.10    5.20
   5  -9   5    8.40    8.90
  -6   9  -5    5.70    5.70
  -6   9  -5    5.70    6.60
  -6   9  -5   -1.40    8.10
   6  -9   5   -3.30    8.00
  -7   9  -5   -0.50    8.20
  -7   9  -5   18.70    9.20
   7  -9   5   16.40    9.00
  -8   9  -5   -7.50    8.50
  -8   9  -5  -14.70    6.60
   8  -9   5    9.90   10.00
  -9   9  -5  -11.90    7.00
  -9   9  -5    0.70    9.10
   9  -9   5   -1.40    8.20
 -10   9  -5   12.70   11.50
 -10   9  -5   -5.50    7.90
  10  -9   5   21.10   10.20
 -11   9  -5    2.10    8.50
 -11   9  -5   10.30   13.50
  11  -9   5   13.10    9.90
 -12   9  -5   -3.30    8.00
 -12   9  -5    5.80   13.70
  12  -9   5    9.00   11.10
 -13   9  -5   -7.00   13.20
  13  -9   5   16.00   13.00
 -14   9  -5   22.20   16.60
 -14   9  -5    7.70   11.20
  14  -9   5   -1.90   15.30
 -15  -8   5   34.10   28.40
 -15  -8   5   57.29   21.30
 -14  -8   5  100.19   48.10
 -13  -8   5   22.40   13.30
 -13  -8   5   43.40   22.90
 -12  -8   5   27.10   19.20
 -12  -8   5   18.90   11.60
 -11  -8   5   25.30   13.50
 -11  -8   5   23.10   19.70
 -10  -8   5   10.60   15.20
 -10  -8   5   17.70    9.90
  -9  -8   5   37.00   15.50
  -9  -8   5   26.90   20.50
  -8  -8   5  143.39   58.19
  -7  -8   5   10.30    7.50
  -7  -8   5   10.00   13.40
  -6  -8   5   73.49   32.20
  -6  -8   5   94.59   35.40
  -5  -8   5   11.70   12.60
  -5  -8   5   19.20    9.80
   4   8  -5   58.09   33.20
  -4  -8   5  120.09   33.80
  -4  -8   5  100.89   35.00
   3   8  -5    2.30   13.50
  -3  -8   5   25.10   12.20
  -3  -8   5   24.40   10.60
  -2  -8   5  109.29   40.80
  -2  -8   5   95.49   39.80
  -1  -8   5   33.30   16.60
  -1  -8   5   32.30   15.00
   0   8  -5   11.00    7.70
   0  -8   5    4.90    7.70
   0  -8   5    7.10    7.30
  -1   8  -5   21.10   10.60
   1  -8   5   14.00   10.30
   1  -8   5   17.60   10.00
  -2   8  -5  112.59   42.20
   2  -8   5  102.59   42.20
  -3   8  -5   26.90   13.00
   3  -8   5   31.90   14.20
  -4   8  -5   81.39   40.20
  -4   8  -5  104.19   39.90
   4  -8   5  142.69   41.70
  -5   8  -5   30.80   12.50
  -5   8  -5   27.80   12.90
   5  -8   5   20.60   13.70
  -6   8  -5   74.79   30.80
  -6   8  -5   71.69   31.00
  -6   8  -5   72.69   31.30
   6  -8   5  107.79   32.20
  -7   8  -5    5.90    8.60
  -7   8  -5    5.40    9.20
   7  -8   5    1.70    7.40
  -8   8  -5  129.99   51.89
  -8   8  -5  102.09   50.79
   8  -8   5  169.48   51.79
  -9   8  -5   37.70   17.60
  -9   8  -5   12.10   14.10
   9  -8   5   45.20   15.60
 -10   8  -5   15.40   11.40
 -10   8  -5   -6.50    7.70
  10  -8   5   10.70    9.80
 -11   8  -5   70.79   21.30
 -11   8  -5    5.10   13.60
  11  -8   5   32.50   14.60
 -12   8  -5    5.60   11.70
 -12   8  -5   25.70   17.20
  12  -8   5   33.70   13.30
 -13   8  -5   24.90   18.20
 -13   8  -5   47.80   26.00
  13  -8   5   55.89   20.40
 -14   8  -5   48.80   22.90
 -14   8  -5   17.10   17.90
  14  -8   5   62.99   21.80
 -15   8  -5   -9.30   16.60
 -15   8  -5   -1.30   10.50
 -15  -7   5    2.60    7.20
 -15  -7   5    4.80   16.50
 -14  -7   5    7.00    9.30
 -14  -7   5   13.60   18.80
 -13  -7   5    2.10   16.10
 -13  -7   5   -0.20    7.80
 -12  -7   5    4.60   16.80
 -12  -7   5    4.20    7.20
 -11  -7   5   -3.10    6.60
 -11  -7   5    8.10   14.90
 -10  -7   5   -8.30    6.50
 -10  -7   5    5.80   12.10
  -9  -7   5   -5.30    5.90
  -9  -7   5    0.80   25.30
  -8  -7   5   -3.50   10.70
  -8  -7   5  -12.30    4.50
  -7  -7   5   -4.40    4.80
  -7  -7   5    0.50    5.50
  -7  -7   5   12.00   11.50
  -6  -7   5   -3.30    8.50
  -6  -7   5    2.90    5.40
  -5  -7   5    3.10    9.40
  -5  -7   5    2.20    5.80
   4   7  -5   -7.60    8.80
   4   7  -5    6.40    9.40
  -4  -7   5   -0.60    7.60
  -4  -7   5    2.70    6.30
   3   7  -5   14.30   13.00
  -3  -7   5   -1.40    7.10
   2   7  -5  -16.00   10.30
  -2  -7   5   -8.10    5.60
  -2  -7   5   -0.80    5.20
   1   7  -5   13.20    7.70
   1   7  -5   -1.20   14.50
  -1  -7   5   -8.30    5.70
  -1  -7   5    0.30    6.20
   0   7  -5    5.20    5.70
   0  -7   5    2.60    5.30
   0  -7   5   -9.50    5.50
  -1   7  -5   -1.80    5.20
   1  -7   5    2.80    5.90
   1  -7   5   -6.90    5.60
  -2   7  -5    4.60    7.70
   2  -7   5   12.00    7.70
   3  -7   5   -1.30    9.70
  -4   7  -5   -0.60    5.50
  -4   7  -5   -3.30    5.60
  -5   7  -5  -10.90    4.60
  -5   7  -5    0.60    6.00
  -6   7  -5    6.70    8.30
  -6   7  -5    4.00    7.50
   6  -7   5    6.40    7.00
  -7   7  -5   13.90    8.40
   7  -7   5    2.60    7.60
  -8   7  -5    2.50    7.30
  -8   7  -5   -9.10    8.50
   8  -7   5    5.00    7.00
  -9   7  -5   -4.50    9.20
  -9   7  -5   17.10    8.30
   9  -7   5   -2.20    7.30
 -10   7  -5   -3.50    9.90
 -10   7  -5    0.80    6.80
  10  -7   5   -6.80    6.70
 -11   7  -5   21.10   14.00
 -11   7  -5   -3.90    7.20
  11  -7   5  -15.00    7.10
 -12   7  -5   20.10   14.60
 -12   7  -5    0.30    7.90
  12  -7   5   12.30    9.00
 -13   7  -5   -8.20    8.20
 -13   7  -5   15.10   15.30
  13  -7   5   14.60   10.00
 -14   7  -5   -5.90    9.60
 -14   7  -5   12.50   16.10
  14  -7   5   12.30   12.20
 -15   7  -5  -20.30   11.30
 -15   7  -5   21.50   17.90
  15  -7   5   -0.10   15.30
 -16  -6   5   -5.90   25.70
 -16  -6   5   80.59   21.10
 -15  -6   5    3.00   18.50
 -15  -6   5   27.00   11.00
 -14  -6   5   36.40   15.00
 -14  -6   5   23.70   23.20
 -13  -6   5   -1.90    5.80
 -13  -6   5  -16.80   13.10
 -12  -6   5    8.30    7.30
 -12  -6   5    3.60   14.00
 -11  -6   5   40.40   20.70
 -11  -6   5   12.70   10.40
 -10  -6   5   -2.60   11.40
 -10  -6   5    9.40    6.40
  -9  -6   5  108.69   45.00
  -9  -6   5  145.29   50.69
  -8  -6   5   -1.90    7.90
  -8  -6   5    2.00    5.00
  -7  -6   5  199.48   73.89
  -7  -6   5  188.48   71.79
  -6  -6   5   -2.20    5.00
  -6  -6   5   14.30   10.60
  -6  -6   5    6.50    5.80
  -5  -6   5  127.29   48.40
  -5  -6   5  131.09   51.09
  -4  -6   5  241.28   86.99
  -4  -6   5  222.58   87.89
  -3  -6   5  167.98   63.69
  -3  -6   5  167.68   62.99
  -2  -6   5   75.29   29.50
  -2  -6   5   75.19   30.30
   1   6  -5  159.18   56.89
  -1  -6   5  138.39   56.79
  -1  -6   5  153.08   56.39
   0   6  -5    1.90   14.20
   0   6  -5   -3.00    5.80
   0  -6   5   11.70    6.40
   0  -6   5   -2.50    5.40
  -1   6  -5  170.98   59.29
  -1   6  -5  141.69   58.79
   1  -6   5  158.78   58.89
   1  -6   5  156.88   58.89
  -2   6  -5   90.39   28.70
  -2   6  -5   67.79   28.10
   2  -6   5   58.49   28.00
  -3   6  -5  157.38   61.19
  -3   6  -5  162.28   61.09
  -3   6  -5  157.18   61.19
   3  -6   5  177.58   61.29
  -4   6  -5  213.38   77.29
  -4   6  -5  207.88   77.09
  -4   6  -5  206.38   77.09
   4  -6   5  199.98   77.09
  -5   6  -5  119.79   52.59
  -5   6  -5  153.68   52.29
   5  -6   5  135.89   52.29
  -6   6  -5    5.30    7.70
  -6   6  -5    5.30    6.50
   6  -6   5   11.90    7.50
  -7   6  -5  201.38   72.49
  -7   6  -5  177.88   71.89
   7  -6   5  192.68   71.69
  -8   6  -5    8.50   10.40
  -8   6  -5   -2.50    6.30
   8  -6   5   14.40    7.40
  -9   6  -5  108.69   51.59
   9  -6   5  148.59   50.29
 -10   6  -5   11.40    7.80
 -10   6  -5    0.30   11.60
  10  -6   5    1.70    6.90
 -11   6  -5    6.80   12.90
 -11   6  -5    4.10    8.90
  11  -6   5   34.00   11.20
 -12   6  -5   -0.20    8.00
 -12   6  -5   -2.20   12.70
  12  -6   5   15.60    9.40
 -13   6  -5   -3.20    8.60
 -13   6  -5   17.00   21.50
  13  -6   5    6.50    8.60
 -14   6  -5   41.80   18.90
 -14   6  -5   34.20   22.90
  14  -6   5   39.20   19.00
 -15   6  -5  -13.30   10.60
 -15   6  -5  -19.70   12.60
  15  -6   5    3.50   12.30
 -16   6  -5   -9.50   10.10
 -16   6  -5   24.80   17.50
 -16  -5   5   55.89   17.00
 -16  -5   5    4.00   22.30
 -15  -5   5   14.20   22.40
 -15  -5   5   37.30   14.20
 -14  -5   5    6.40   15.70
 -14  -5   5   10.80    7.90
 -13  -5   5    9.20   14.90
 -13  -5   5    3.10    7.00
 -12  -5   5    5.50    6.40
 -12  -5   5   -8.50   11.40
 -11  -5   5   -6.60    4.90
 -11  -5   5    9.00   11.20
 -10  -5   5   -2.30    5.20
  -9  -5   5   10.50   10.70
  -9  -5   5   -3.30    4.60
  -8  -5   5    7.80    9.40
  -8  -5   5  -10.10    4.30
  -7  -5   5   -1.70    4.00
  -7  -5   5   -0.30    8.40
  -6  -5   5   -7.70    3.90
  -6  -5   5    0.10    7.20
  -5  -5   5   -3.10    7.80
  -5  -5   5   -0.30    3.90
  -5  -5   5   -2.50    4.10
   4   5  -5   -4.00    7.20
  -4  -5   5   -3.90    4.00
  -4  -5   5   -0.20    6.20
   3   5  -5    2.10   10.30
   3   5  -5    0.40    3.20
  -3  -5   5   -5.10    5.90
  -3  -5   5    7.90    5.90
   2   5  -5   -8.50    5.30
   2   5  -5   -1.30    3.20
  -2  -5   5   -3.80    4.70
  -2  -5   5   -2.30    5.90
   1   5  -5   -0.40    6.20
   1   5  -5   -9.00    4.20
  -1  -5   5   -3.90    6.30
  -1  -5   5   -4.40    4.30
   0   5  -5    0.60    5.90
   0   5  -5   -2.00    5.10
   0  -5   5    4.10    5.50
   0  -5   5   -3.70    5.10
  -1   5  -5    4.30    5.30
  -1   5  -5   11.30    6.70
   1  -5   5   -1.10    5.40
   1  -5   5    2.80    5.60
  -2   5  -5    6.40    5.70
  -2   5  -5   -2.40    4.80
   2  -5   5   -4.40    4.90
  -3   5  -5   -4.10    4.70
  -3   5  -5   -2.90    4.50
   3  -5   5   -3.70    5.00
  -4   5  -5   13.70    5.80
   4  -5   5   -6.00    4.50
  -5   5  -5   -8.20    3.40
  -5   5  -5  -14.30    4.60
   5  -5   5    5.70    5.20
  -6   5  -5   -4.10    5.70
  -6   5  -5   -0.70    5.10
   6  -5   5    2.60    5.40
  -7   5  -5   -4.80    5.30
  -7   5  -5    5.90    8.40
   7  -5   5    0.80    5.20
  -8   5  -5   -3.20    5.50
  -8   5  -5   19.90   10.30
   8  -5   5   -9.00    4.70
  -9   5  -5   -0.60    5.50
  -9   5  -5    2.10   10.00
   9  -5   5   -2.40    5.50
 -10   5  -5   -8.50    5.90
 -10   5  -5   -3.00   10.60
  10  -5   5   -0.80    6.80
 -11   5  -5    6.80   11.60
 -11   5  -5  -12.90    5.80
  11  -5   5    8.80    7.10
 -12   5  -5   -3.50   10.60
 -12   5  -5    4.90    8.00
  12  -5   5   -1.50    7.40
 -13   5  -5   21.30   16.60
 -13   5  -5    9.70    9.10
  13  -5   5   -0.70    7.50
 -14   5  -5   18.70   16.30
 -14   5  -5   -1.70    9.20
  14  -5   5    7.30    9.10
 -15   5  -5   -7.70    9.10
 -15   5  -5   11.80   15.60
  15  -5   5   -9.00   10.70
 -16   5  -5  -14.00    9.30
 -16   5  -5   23.60   18.50
  16  -5   5   -8.20   15.20
 -16  -4   5   45.30   33.20
 -16  -4   5   76.69   27.10
 -15  -4   5   23.60   25.80
 -15  -4   5   60.59   20.40
 -14  -4   5   36.80   25.50
 -14  -4   5   39.10   16.60
 -13  -4   5   -1.60   13.70
 -13  -4   5   17.90    7.80
 -12  -4   5   14.30   15.60
 -12  -4   5   -0.30    5.60
 -12  -4   5   -0.50   14.10
 -11  -4   5   -9.30   13.70
 -11  -4   5    9.60    5.90
 -10  -4   5   50.79   17.50
 -10  -4   5   36.10   23.00
 -10  -4   5   38.20   18.60
  -9  -4   5   34.40   13.90
  -9  -4   5   24.50   11.80
  -9  -4   5   13.90   16.20
   8   4  -5   43.60   16.50
  -8  -4   5   25.60   17.10
  -8  -4   5   27.50   13.60
   7   4  -5   65.89   26.60
  -7  -4   5   93.89   26.50
  -7  -4   5   62.19   26.70
  -7  -4   5   54.49   28.90
   6   4  -5   10.10   10.90
  -6  -4   5    7.30    9.80
  -6  -4   5   27.90   11.30
  -6  -4   5   13.00    7.10
  -5  -4   5  210.78   69.29
  -5  -4   5  162.88   67.99
   4   4  -5   84.79   32.10
  -4  -4   5   91.99   32.50
  -4  -4   5   78.49   32.30
  -4  -4   5   92.89   35.50
   3   4  -5  168.38   62.19
   3   4  -5  156.88   60.99
  -3  -4   5  158.28   62.09
  -3  -4   5  175.58   61.29
   2   4  -5  136.59   50.89
   2   4  -5  116.69   50.49
   2   4  -5  156.48   51.69
  -2  -4   5  129.69   51.39
  -2  -4   5  148.89   50.89
   1   4  -5  143.99   50.89
   1   4  -5  143.99   51.39
  -1  -4   5  131.99   51.19
  -1  -4   5  124.69   50.69
   0   4  -5    1.20    6.40
   0   4  -5   13.10    5.90
   0  -4   5    4.60    5.70
   0  -4   5    2.30    5.90
  -1   4  -5  150.88   50.39
  -1   4  -5  116.79   49.99
   1  -4   5  135.49   49.99
  -2   4  -5  159.98   54.79
  -2   4  -5  140.29   54.49
   2  -4   5  137.99   54.49
  -3   4  -5  189.08   68.69
  -3   4  -5  160.08   68.89
   3  -4   5  196.08   68.69
  -4   4  -5   89.29   30.30
  -4   4  -5   77.79   30.80
   4  -4   5   71.99   30.30
  -5   4  -5  165.58   65.59
   5  -4   5  182.38   65.49
  -6   4  -5   28.70   11.60
  -6   4  -5   25.70   12.80
   6  -4   5   24.10   11.30
  -7   4  -5   72.89   29.40
  -7   4  -5   58.39   27.50
   7  -4   5   79.69   27.60
  -8   4  -5   39.30   18.60
  -8   4  -5   31.60   15.40
   8  -4   5   39.70   15.60
  -9   4  -5   23.50   17.50
  -9   4  -5   26.10   14.20
   9  -4   5   44.60   14.60
 -10   4  -5   48.70   23.70
 -10   4  -5   43.00   19.70
  10  -4   5   49.60   20.10
 -11   4  -5   25.00   10.80
 -11   4  -5   16.20   15.30
  11  -4   5   16.00   10.40
 -12   4  -5    0.40    7.40
 -12   4  -5   -2.50   12.40
  12  -4   5    2.50    6.90
 -13   4  -5   11.50   15.50
 -13   4  -5   17.50   10.20
  13  -4   5    4.90    9.50
 -14   4  -5    5.50   16.90
 -14   4  -5   24.30   12.30
  14  -4   5   21.90   12.80
 -15   4  -5   15.50   15.20
 -15   4  -5   20.40   21.50
  15  -4   5   53.39   16.80
 -16   4  -5    3.60   15.10
 -16   4  -5   22.90   12.50
  16  -4   5   14.00   14.50
 -17  -3   5  -13.00   13.20
 -16  -3   5   64.59   20.50
 -16  -3   5    3.50   27.70
 -15  -3   5   30.80   10.00
 -15  -3   5   -3.60   15.10
 -14  -3   5    9.50    5.70
 -14  -3   5   -6.30   13.40
 -13  -3   5    8.10   16.20
 -13  -3   5   17.60    8.30
 -12  -3   5   17.70   14.60
 -12  -3   5   -0.70    5.20
 -11  -3   5   -0.40    4.50
 -11  -3   5   -4.40   12.20
 -10  -3   5   16.70   13.60
 -10  -3   5   -0.40    4.20
 -10  -3   5   -2.30   11.30
   9   3  -5   -0.60   11.70
  -9  -3   5   22.00    9.90
  -9  -3   5    3.40   10.60
  -9  -3   5   -7.50    3.30
   8   3  -5   -0.90    9.70
  -8  -3   5    4.50    9.40
  -8  -3   5    6.00    4.20
  -8  -3   5   11.10    9.30
   7   3  -5   -1.50    9.60
  -7  -3   5   -7.40    7.40
  -7  -3   5    1.30    3.60
  -7  -3   5    3.30    8.00
   6   3  -5   -7.80   10.30
  -6  -3   5   -2.60    6.90
  -6  -3   5   -4.30    3.10
  -6  -3   5    0.10    8.10
   5   3  -5   -0.50   11.20
   5   3  -5    1.50    3.20
  -5  -3   5   -2.20    6.40
  -5  -3   5   -4.20    3.50
  -5  -3   5    9.10    8.30
   4   3  -5    3.40    9.90
  -4  -3   5   -9.00    8.70
  -4  -3   5   -3.70    3.00
  -4  -3   5    0.30    5.90
   3   3  -5    9.20    9.90
   3   3  -5    5.70    7.70
   3   3  -5    4.10    4.30
   3   3  -5   -2.30    2.70
  -3  -3   5    0.30    3.50
  -3  -3   5   -0.60    3.30
  -3  -3   5    0.20    6.80
   2   3  -5   -6.10    2.40
   2   3  -5   -3.20    7.10
   2   3  -5   -2.90    4.60
   2   3  -5    3.90   11.70
  -2  -3   5    1.40    6.30
  -2  -3   5   -4.60    3.70
   1   3  -5   -4.20    4.30
   1   3  -5   -2.00    5.80
  -1  -3   5    4.20    4.30
  -1  -3   5    3.60    5.90
   0   3  -5    7.50    4.80
   0   3  -5    0.00    6.10
   0  -3   5    1.80    5.30
   0  -3   5    4.60    4.30
  -1   3  -5    0.60    4.30
  -1   3  -5    1.20    5.10
   1  -3   5    3.40    4.30
  -2   3  -5   -0.20    3.80
  -2   3  -5   -1.30    4.40
   2  -3   5   -2.60    3.80
  -3   3  -5   -2.80    4.40
  -3   3  -5   -1.50    3.70
   3  -3   5   -4.10    3.40
   3  -3   5    2.50    3.80
  -4   3  -5    4.80    4.50
  -4   3  -5    4.00   14.90
   4  -3   5   -2.10    3.70
  -5   3  -5   -3.30    6.20
  -5   3  -5   -3.50    3.50
   5  -3   5   -1.00    3.80
  -6   3  -5   -5.50    6.40
  -6   3  -5    0.20    4.00
   6  -3   5    0.50    3.80
  -7   3  -5  -10.20    6.90
  -7   3  -5   -1.60    4.20
   7  -3   5   -0.90    4.00
  -8   3  -5   -2.80    4.30
  -8   3  -5   -3.90    7.90
   8  -3   5    8.50    5.00
  -9   3  -5   -0.30    9.30
  -9   3  -5   -4.30    5.00
   9  -3   5    3.30    4.60
 -10   3  -5    5.00    5.90
 -10   3  -5    5.60   10.20
  10  -3   5   -9.70    5.60
 -11   3  -5   -2.40   10.50
 -11   3  -5   -0.50    6.70
  11  -3   5    3.50    6.20
 -12   3  -5   11.70    8.00
 -12   3  -5   -1.60   13.60
  12  -3   5    5.90    7.30
 -13   3  -5   -2.00    6.60
 -13   3  -5    7.00   13.40
  13  -3   5    8.00    7.40
 -14   3  -5    6.20   14.40
 -14   3  -5   -9.40    7.80
  14  -3   5    2.00    7.90
 -15   3  -5    1.20   13.80
 -15   3  -5   -8.20    8.40
  15  -3   5    8.90   10.80
 -16   3  -5  -14.60   15.50
 -16   3  -5   -6.40   10.40
  16  -3   5   18.70   13.30
 -16  -2   5   -7.80   17.30
 -16  -2   5   63.69   14.60
 -15  -2   5   83.49   30.60
 -15  -2   5   62.89   36.70
 -14  -2   5   31.00   13.10
 -14  -2   5   26.20   21.20
 -13  -2   5    9.60    5.70
 -13  -2   5   -6.00   14.30
 -12  -2   5  157.28   62.59
 -12  -2   5  238.08   71.09
 -11  -2   5  101.09   46.70
 -11  -2   5  111.59   41.40
 -10  -2   5   79.59   27.80
 -10  -2   5   53.29   31.50
   9   2  -5   43.50   21.80
  -9  -2   5    7.80   10.40
  -9  -2   5    0.10    4.30
   8   2  -5    5.70   10.80
  -8  -2   5    5.30    9.10
  -8  -2   5   -0.90    3.30
   7   2  -5   81.89   23.50
  -7  -2   5   40.10   20.80
  -7  -2   5   38.00   17.30
   6   2  -5  179.08   48.00
   6   2  -5  125.59   43.60
  -6  -2   5  138.99   47.20
  -6  -2   5  111.89   44.70
  -6  -2   5   95.49   43.60
   5   2  -5   84.59   28.60
   5   2  -5   42.80   31.40
  -5  -2   5   75.79   28.80
  -5  -2   5   84.49   30.00
  -5  -2   5   66.79   33.90
   4   2  -5    6.20   12.60
   4   2  -5    5.30    2.70
   4   2  -5   -6.50    6.50
   4   2  -5    4.80    3.90
  -4  -2   5    6.00    8.80
  -4  -2   5   -3.20    2.60
  -4  -2   5    4.30    6.70
   3   2  -5   54.29   21.40
   3   2  -5   49.60   23.30
   3   2  -5   52.59   22.10
  -3  -2   5   71.39   21.70
  -3  -2   5   62.89   23.60
  -3  -2   5   51.39   23.90
   2   2  -5  371.86  135.09
   2   2  -5  385.06  135.59
   2   2  -5  382.36  134.89
  -2  -2   5  328.57  134.89
  -2  -2   5  365.56  135.49
   1   2  -5 2987.40 1215.98
   1   2  -5 3532.55 1216.28
  -1  -2   5 3486.85 1216.28
  -1  -2   5 3177.08 1215.98
   0   2  -5 9281.57 3550.34
   0   2  -5 9999.00 3550.54
   0  -2   5 9557.74 3550.54
   0  -2   5 9615.54 3550.34
  -1   2  -5 3000.40 1153.98
  -1   2  -5 2990.10 1153.78
  -1   2  -5 3216.88 1153.78
   1  -2   5 3279.67 1153.78
  -2   2  -5  367.96  128.39
  -2   2  -5  323.97  128.59
   2  -2   5  378.76  128.39
   2  -2   5  302.57  128.49
  -3   2  -5   49.70   17.90
   3  -2   5   38.20   18.00
   3  -2   5   47.50   17.50
  -4   2  -5    0.70    3.80
   4  -2   5    6.00    3.40
   4  -2   5   -1.50    2.90
  -5   2  -5   83.29   27.60
  -5   2  -5   68.19   25.50
   5  -2   5   62.39   25.10
  -6   2  -5  139.39   50.49
  -6   2  -5  121.79   47.00
  -7   2  -5   33.00   14.50
  -7   2  -5   44.20   18.00
  -8   2  -5    1.80    8.90
  -8   2  -5    3.00    4.70
  -9   2  -5   15.90    7.20
  -9   2  -5   -7.10    8.90
   9  -2   5   17.50    6.10
 -10   2  -5   80.89   31.40
 -10   2  -5   83.69   35.90
 -11   2  -5  114.39   47.80
 -11   2  -5  112.39   43.00
 -12   2  -5  235.08   86.39
 -12   2  -5  219.78   91.39
 -13   2  -5   -0.20    7.00
 -13   2  -5   11.80   16.10
  13  -2   5    6.00    7.40
 -14   2  -5   19.90   11.60
 -14   2  -5   15.70   17.00
  14  -2   5   23.20   12.40
 -15   2  -5   79.49   34.20
 -15   2  -5   56.59   26.90
  15  -2   5   68.19   28.00
 -16   2  -5   20.70   19.30
  16  -2   5   15.00   13.30
 -17   2  -5   40.50   27.30
 -17   2  -5   32.80   17.40
 -17  -1   5   45.80   27.40
 -16  -1   5    8.30   19.80
 -16  -1   5   38.50   13.50
 -15  -1   5   24.90   17.60
 -15  -1   5   19.40   10.30
 -14  -1   5   12.50    8.00
 -14  -1   5   12.90   16.50
 -13  -1   5   -4.50   14.50
 -13  -1   5    5.30    5.50
 -12  -1   5    2.70    5.20
 -12  -1   5  -14.40   11.40
 -11  -1   5    4.20    5.00
 -11  -1   5   -0.10   11.90
  10   1  -5   -5.20   15.70
 -10  -1   5   -3.90    3.90
 -10  -1   5   -2.60    9.50
   9   1  -5    1.10   12.00
  -9  -1   5    3.60    4.00
  -9  -1   5   -8.00    8.70
   8   1  -5   -3.00   14.50
  -8  -1   5   -2.80    3.30
  -8  -1   5    0.90    8.70
   7   1  -5   -2.00   11.70
  -7  -1   5    0.60    2.80
  -7  -1   5    4.40   11.50
  -7  -1   5   -1.90    8.40
   6   1  -5   -3.30   11.40
   6   1  -5   -2.10    2.30
  -6  -1   5    5.40   15.40
  -6  -1   5   -2.20    6.70
  -6  -1   5   -1.50    2.80
   5   1  -5    1.90    2.70
   5   1  -5   13.50   14.30
   5   1  -5   -3.00    6.10
  -5  -1   5   -1.10    7.00
  -5  -1   5   -8.30    9.30
  -5  -1   5    0.60    2.50
   4   1  -5   -3.70   13.80
   4   1  -5   -2.20    6.60
   4   1  -5   -1.70    1.80
  -4  -1   5   -2.10    2.00
  -4  -1   5    0.20    7.20
   3   1  -5    0.50    1.60
   3   1  -5   -9.20    5.90
   3   1  -5    6.40   12.80
  -3  -1   5   12.60    9.90
  -3  -1   5   -2.60    1.80
  -3  -1   5   -4.40    6.10
   2   1  -5    0.90    1.70
   2   1  -5    1.90   11.10
   2   1  -5    0.20    5.50
  -2  -1   5   -4.50    4.80
  -2  -1   5   -6.60    9.60
   1   1  -5    1.60    9.30
   1   1  -5   -0.50    4.80
   1   1  -5   -0.50    1.30
  -1  -1   5   -2.10    4.60
  -1  -1   5  -11.10    9.10
   0   1  -5    2.50    4.10
   0   1  -5   -0.10    1.90
   0  -1   5    1.70    4.00
  -1   1  -5    0.20    2.30
  -1   1  -5   -1.90    1.50
   1  -1   5    1.00    1.90
  -2   1  -5   -2.70    2.20
   2  -1   5    0.50    2.30
  -3   1  -5    2.90    2.80
   3  -1   5   -3.30    2.40
  -4   1  -5    6.00    6.70
  -4   1  -5    1.20    2.90
   4  -1   5   -1.60    2.60
  -5   1  -5    7.00   13.70
  -5   1  -5   -3.40    6.80
  -5   1  -5    3.30    3.20
   5  -1   5   -1.70    2.30
  -6   1  -5   -7.80   11.70
  -6   1  -5    0.40    3.40
  -6   1  -5   -9.10    7.10
   6  -1   5    1.30    2.80
  -7   1  -5    1.80    3.90
  -7   1  -5    1.90    7.90
  -8   1  -5    5.90    9.30
  -8   1  -5    1.70    4.20
   8  -1   5   -0.30    3.00
  -9   1  -5    2.90    4.60
  -9   1  -5    3.90   10.10
 -10   1  -5   -7.10    9.80
 -10   1  -5    2.80    5.10
 -11   1  -5  -15.30   10.00
 -12   1  -5   -0.70    6.20
 -12   1  -5   -6.60   13.30
 -13   1  -5  -11.30    6.30
 -13   1  -5   16.20   15.10
 -14   1  -5    1.20   13.00
 -14   1  -5   -4.50    7.90
 -15   1  -5    2.70   15.70
 -15   1  -5   -4.30    7.70
 -16   1  -5    8.30    9.80
 -16   1  -5   -1.40   14.90
  16  -1   5   11.20   10.50
 -17   1  -5    5.30    8.50
 -17   1  -5    4.60   16.90
  17  -1   5   18.10   16.00
 -17   0   5   76.89   54.39
 -17   0   5  147.89   49.10
 -16   0   5  -15.00   12.80
 -16   0   5   20.70    8.00
 -15   0   5   80.69   40.60
 -15   0   5   90.19   34.10
 -14   0   5  -11.00   12.40
 -14   0   5   -1.20    6.20
 -13   0   5    4.70    6.40
 -13   0   5    9.70   14.90
 -12   0   5  203.28   75.79
 -11   0   5   30.60   18.80
 -11   0   5   29.30   12.50
  10   0  -5  176.98   73.59
 -10   0   5  195.78   71.09
 -10   0   5  202.18   75.59
   9   0  -5  220.18   65.09
  -9   0   5  177.08   62.09
  -9   0   5  139.79   57.39
   8   0  -5  225.08   92.99
  -8   0   5  276.67   91.39
  -8   0   5  206.28   92.99
  -7   0   5    5.40    3.40
  -7   0   5    2.70    8.50
   6   0  -5   53.19   20.40
   6   0  -5   20.10   11.50
  -6   0   5   34.30   11.40
  -6   0   5   33.60   18.50
   5   0  -5   51.89   25.60
   5   0  -5   78.89   28.00
   5   0  -5  131.89   33.20
  -5   0   5   65.69   27.90
  -5   0   5   71.99   25.50
  -5   0   5   64.99   31.10
   4   0  -5   47.20   23.30
   4   0  -5   89.89   26.70
   4   0  -5  103.29   30.00
  -4   0   5   77.19   25.60
  -4   0   5   64.09   23.20
   3   0  -5  299.87  111.29
   3   0  -5  289.37  110.69
  -3   0   5  321.87  110.89
  -3   0   5  269.27  110.59
  -3   0   5  302.47  109.89
   2   0  -5 2804.42  997.30
  -2   0   5 2747.72  997.30
  -2   0   5 2557.24  996.90
   1   0  -5 3016.30 1072.19
  -1   0   5 3028.40 1072.09
  -1   0   5 2664.03 1072.19
  -1   0  -5 3698.13 1232.18
  -1   0  -5 3262.67 1232.28
   1   0   5 3068.09 1232.28
   1   0   5 3315.27 1232.18
  -2   0  -5 2905.61 1163.38
  -2   0  -5 3635.24 1163.38
   2   0   5 3129.49 1163.38
   2   0   5 2933.71 1163.38
  -3   0  -5  298.47  109.49
   3   0   5  317.27  109.59
   3   0   5  271.57  109.49
  -4   0  -5   77.49   25.30
  -4   0  -5   86.39   27.90
   4   0   5   55.79   25.30
   4   0   5   65.29   25.40
  -5   0  -5   81.29   27.90
  -5   0  -5   31.10   27.70
  -5   0  -5   75.29   24.50
   5   0   5   62.59   24.60
  -6   0  -5    2.30   15.90
  -6   0  -5   28.00   14.60
   6   0   5   33.70   11.00
  -7   0  -5    9.00    3.90
  -7   0  -5   -4.80   13.50
  -7   0  -5   10.50    9.50
   7   0   5   -1.80    3.80
  -8   0  -5  278.97   97.49
  -8   0  -5  243.88   99.29
   8   0   5  254.57   97.59
  -9   0  -5  141.59   53.09
  -9   0  -5  143.39   57.29
 -10   0  -5  252.17   90.19
 -10   0  -5  222.88   84.99
 -11   0  -5   48.80   26.10
 -11   0  -5   51.79   21.90
 -12   0  -5  223.98   90.09
 -12   0  -5  226.68   84.39
 -13   0  -5  -13.80    6.00
 -13   0  -5   11.10   14.40
 -14   0  -5    1.40   14.10
 -14   0  -5    3.40    7.30
 -15   0  -5   71.59   46.50
 -15   0  -5  125.19   41.60
 -16   0  -5   23.00   19.10
 -16   0  -5    4.60    8.30
 -17   0  -5   84.89   46.50
 -17   0  -5  107.69   39.70
  17  -1  -5  -10.20   12.30
 -17   1   5   28.90   12.90
 -16   1   5   19.60    9.20
 -16   1   5   -1.60   15.90
 -15   1   5   21.10   17.30
 -15   1   5    5.00    7.60
 -14   1   5    3.50   15.40
 -14   1   5   -6.80    6.30
 -13   1   5    7.00    6.50
 -13   1   5    2.80   13.40
 -12   1   5    3.40    6.30
 -12   1   5   19.30   15.00
 -11   1   5   -3.30   11.50
 -11   1   5   -8.40    4.70
  10  -1  -5   -4.70   19.50
 -10   1   5    1.40    4.30
 -10   1   5    6.20   11.20
   9  -1  -5    0.00   15.80
  -9   1   5    0.00    3.80
  -9   1   5   -2.70    8.50
   8  -1  -5    8.40   14.10
  -8   1   5   -0.10    8.50
  -8   1   5    4.20    3.70
   7  -1  -5    0.40   13.60
  -7   1   5   -2.60    2.90
  -7   1   5    8.10    8.80
   6  -1  -5    2.00    2.90
   6  -1  -5    1.90    7.70
   6  -1  -5    9.60   17.00
  -6   1   5   -3.00    2.60
  -6   1   5   -4.10    6.90
   5  -1  -5    6.50    7.30
   5  -1  -5   -0.90    3.00
   5  -1  -5    2.00   14.00
  -5   1   5   11.10   16.10
  -5   1   5    3.90    2.90
   4  -1  -5   -4.60    2.60
   4  -1  -5    1.90    5.90
   4  -1  -5    3.40   15.30
  -4   1   5    2.00    2.50
  -4   1   5    3.10    6.50
  -4   1   5    6.20   18.30
   3  -1  -5    0.80    5.80
   3  -1  -5   -2.40   15.50
   3  -1  -5   -2.20    2.60
  -3   1   5   -2.50    2.50
  -3   1   5    6.80   14.40
  -3   1   5    3.40    5.00
   2  -1  -5   -4.30    4.30
   2  -1  -5   -8.20   14.40
  -2   1   5   -1.50    4.40
  -2   1   5   -5.50   12.70
  -2   1   5   -0.10    2.50
   1  -1  -5    0.70    3.60
   1  -1  -5    7.40   14.10
   1  -1  -5    0.90    3.50
  -1   1   5    3.20    3.40
  -1   1   5   -0.60   10.60
   0  -1  -5   -8.30    8.90
   0  -1  -5   -0.90    3.40
   0  -1  -5   -2.20    1.90
   0   1   5   -1.40    3.30
   0   1   5    0.70    1.70
   0   1   5    4.40    8.30
  -1  -1  -5   -9.20    2.20
  -1  -1  -5    3.50    3.40
  -1  -1  -5    4.10    8.90
   1   1   5    1.40    8.40
   1   1   5   -3.60    2.20
   1   1   5    3.40    3.50
  -2  -1  -5   -1.50    2.70
  -2  -1  -5   -2.20   11.80
  -2  -1  -5   -5.10    3.50
   2   1   5   10.40    2.90
   2   1   5   -9.10    3.50
  -3  -1  -5    1.70    3.00
  -3  -1  -5    2.50    3.70
  -3  -1  -5    3.70    7.30
   3   1   5    5.30    4.60
   3   1   5    4.20    2.80
  -4  -1  -5    2.40    2.50
  -4  -1  -5   -2.30    3.10
  -4  -1  -5   -6.90    6.60
   4   1   5    3.80    2.70
   4   1   5   -5.50    3.90
  -5  -1  -5   10.60   10.90
  -5  -1  -5   -0.40    7.40
  -5  -1  -5    0.50    3.30
   5   1   5   10.40    4.80
  -6  -1  -5   -0.70    7.60
  -6  -1  -5    0.00   11.50
  -6  -1  -5    5.30    3.90
   6   1   5    1.70    4.40
  -7  -1  -5   -0.80    3.50
  -7  -1  -5    0.20    8.90
  -7  -1  -5   -5.50   11.20
   7   1   5   -3.40    3.50
  -8  -1  -5    3.00    8.40
  -8  -1  -5   22.30   12.30
  -8  -1  -5    0.80    4.30
  -9  -1  -5    0.20   11.00
  -9  -1  -5   -8.70    4.00
 -10  -1  -5   11.70   13.10
 -10  -1  -5    5.00    5.70
 -11  -1  -5  -13.40    6.80
 -11  -1  -5   14.00   15.10
 -12  -1  -5   -5.40    5.60
 -12  -1  -5  -12.50   11.60
 -13  -1  -5    2.00    6.00
 -13  -1  -5    3.80   15.60
 -14  -1  -5   13.00   16.20
 -14  -1  -5   18.20    9.80
 -15  -1  -5   21.90   10.00
 -15  -1  -5    0.90   18.20
 -16  -1  -5   17.60   19.90
 -16  -1  -5   21.80   11.00
 -17  -1  -5   -3.60   20.10
 -17  -1  -5   48.00   14.40
  17  -2  -5   46.70   21.60
 -17   2   5   28.30   21.10
 -17   2   5   32.60   17.90
  16  -2  -5   50.59   13.50
 -16   2   5   -7.40   12.50
 -16   2   5   -8.60    8.10
  15  -2  -5   98.39   29.20
 -15   2   5   43.50   24.80
 -15   2   5   72.19   32.30
 -14   2   5   23.70   19.70
 -14   2   5   15.30   10.20
 -13   2   5   30.20   19.10
 -13   2   5    9.80    8.60
 -12   2   5  201.78   81.59
 -12   2   5  232.18   85.29
 -11   2   5   86.19   41.70
 -11   2   5  102.19   37.30
  10  -2  -5  106.49   41.40
 -10   2   5   74.39   36.40
 -10   2   5   83.49   32.40
   9  -2  -5   -7.30   15.50
  -9   2   5    6.50   10.50
  -9   2   5    5.60    4.70
   8  -2  -5    1.10   14.80
  -8   2   5    5.20    3.90
  -8   2   5   -7.90    7.60
   7  -2  -5   40.30   22.80
  -7   2   5   34.00   14.90
  -7   2   5   53.29   20.40
   6  -2  -5  129.89   42.00
  -6   2   5   87.19   40.70
  -6   2   5  146.79   43.30
   5  -2  -5   87.29   28.30
   5  -2  -5   71.99   29.90
  -5   2   5   62.09   28.00
  -5   2   5   80.09   29.70
   4  -2  -5   -0.10    5.80
   4  -2  -5    4.80   15.90
  -4   2   5    5.30    3.60
  -4   2   5    7.40    6.40
  -4   2   5   -8.60   14.40
   3  -2  -5   53.89   22.20
   3  -2  -5   55.29   22.50
   3  -2  -5  108.69   30.20
  -3   2   5   60.19   21.90
  -3   2   5   27.40   28.50
  -3   2   5   55.29   22.30
   2  -2  -5  346.07  135.09
   2  -2  -5  357.96  134.99
   2  -2  -5  330.17  135.99
  -2   2   5  369.96  134.99
  -2   2   5  387.06  135.09
  -2   2   5  395.56  135.99
   1  -2  -5 3136.49 1144.59
   1  -2  -5 3058.89 1144.29
  -1   2   5 3205.68 1144.79
  -1   2   5 2992.50 1144.49
   0   2   5 7269.97 2380.16
   0   2   5 5973.70 2380.16
   0   2   5 6104.89 2379.86
  -1  -2  -5 2887.81 1093.89
  -1  -2  -5 2992.80 1094.19
  -1  -2  -5 3058.29 1094.09
   1   2   5 2896.51 1094.09
   1   2   5 3002.50 1093.89
   1   2   5 2932.51 1094.19
  -2  -2  -5  383.56  142.39
  -2  -2  -5  375.16  141.99
  -2  -2  -5  371.96  141.89
   2   2   5  425.46  141.89
   2   2   5  356.06  142.09
  -3  -2  -5   62.89   23.60
  -3  -2  -5   67.39   24.30
  -3  -2  -5   54.09   25.20
   3   2   5   79.59   24.50
   3   2   5   56.99   23.40
  -4  -2  -5    6.30    4.80
  -4  -2  -5    3.10    7.80
  -4  -2  -5   -3.10    3.40
   4   2   5    8.60    3.80
   4   2   5    9.50    7.20
   4   2   5    9.30    5.70
  -5  -2  -5   70.99   29.50
  -5  -2  -5   77.59   29.50
   5   2   5   89.99   29.90
  -6  -2  -5   93.59   40.60
  -6  -2  -5  110.29   40.80
  -6  -2  -5  143.09   44.50
  -6  -2  -5  105.99   41.90
   6   2   5  121.29   41.20
  -7  -2  -5   36.50   19.20
  -7  -2  -5   48.30   20.00
  -7  -2  -5   37.70   15.40
  -8  -2  -5    1.90    4.10
  -8  -2  -5   -6.10    8.30
  -8  -2  -5  -14.80   19.30
  -9  -2  -5   -2.00    4.50
  -9  -2  -5    3.70   11.60
  -9  -2  -5   26.00   15.40
 -10  -2  -5   80.49   34.30
 -10  -2  -5   74.29   29.10
 -11  -2  -5   71.79   38.40
 -11  -2  -5   86.09   32.60
 -12  -2  -5  178.38   59.99
 -12  -2  -5  130.99   52.19
 -13  -2  -5    3.70    6.10
 -13  -2  -5   20.50   17.30
 -14  -2  -5    9.70   18.30
 -14  -2  -5   18.30    9.20
 -15  -2  -5   83.49   34.30
 -15  -2  -5   48.40   21.50
 -16  -2  -5   12.50    7.10
 -16  -2  -5  -13.10   24.40
 -17  -2  -5   97.19   24.80
 -17  -2  -5    2.50   28.90
 -17   3   5   -6.00   14.00
  16  -3  -5    3.10   12.90
 -16   3   5   10.30   12.30
 -16   3   5   -8.90    8.90
  15  -3  -5   12.20   14.10
 -15   3   5   31.30   19.90
  14  -3  -5    9.40   11.30
 -14   3   5   -3.80    6.90
 -14   3   5   33.60   18.40
  13  -3  -5   21.30   11.30
 -13   3   5    3.80    7.60
  12  -3  -5    3.80    9.40
 -12   3   5   -4.00    5.80
 -12   3   5    1.40   12.90
  11  -3  -5    6.70    8.10
 -11   3   5   -2.70    5.30
 -11   3   5   15.70   13.50
  10  -3  -5   -1.80    6.90
  10  -3  -5    9.10   18.90
 -10   3   5   -1.40   10.30
 -10   3   5   10.60    5.70
   9  -3  -5   -2.80    5.50
   9  -3  -5   -1.70   20.10
  -9   3   5   -3.30    4.20
  -9   3   5   -4.60    9.70
   8  -3  -5   -1.70    5.90
   8  -3  -5   17.40   17.40
  -8   3   5    5.60    9.30
  -8   3   5   -1.60    3.80
   7  -3  -5    7.20    5.60
   7  -3  -5  -22.50   13.80
  -7   3   5    7.90    8.20
  -7   3   5   -0.70    3.90
   6  -3  -5    7.60   15.50
   6  -3  -5    7.90    6.20
   6  -3  -5    0.20    4.90
  -6   3   5   -4.00    6.00
  -6   3   5   -0.40    3.90
   5  -3  -5   -7.50    4.50
   5  -3  -5   -8.10   13.50
   5  -3  -5   -3.50    5.00
  -5   3   5   -0.40    5.50
   4  -3  -5    1.60    5.00
   4  -3  -5    1.50    5.20
  -4   3   5   -3.20    4.80
  -4   3   5    1.10    4.10
   3  -3  -5   -1.00    4.20
   3  -3  -5   -1.40   14.10
   3  -3  -5  -10.00    5.20
  -3   3   5    6.90    5.10
  -3   3   5   14.80   17.50
  -3   3   5   -0.80    3.60
   2  -3  -5  -19.30   15.60
   2  -3  -5   -2.00    5.30
  -2   3   5   16.70   20.00
   1  -3  -5  -10.70   16.10
   1  -3  -5   -4.10    5.40
  -1   3   5   -1.20    5.20
  -1   3   5    4.60   14.60
   0  -3  -5    3.00    4.40
   0  -3  -5   -3.10    5.20
   0  -3  -5   -8.70   13.60
   0   3   5    4.00    5.30
   0   3   5   -0.20   11.80
  -1  -3  -5    1.30    5.30
  -1  -3  -5   11.10   12.30
  -1  -3  -5   -2.40    3.70
  -1  -3  -5    0.90    5.50
   1   3   5    7.90    9.70
   1   3   5   -6.20    2.60
   1   3   5   -3.40    4.90
  -2  -3  -5    1.50    9.70
  -2  -3  -5    0.40    5.50
  -2  -3  -5   -4.80    5.70
  -2  -3  -5   -1.80    3.60
   2   3   5   -4.90    2.70
   2   3   5    4.20    8.60
   2   3   5   -0.10    5.30
   2   3   5   -3.90    5.50
  -3  -3  -5   -7.40    6.30
  -3  -3  -5    1.10    5.30
  -3  -3  -5    3.30    4.00
  -3  -3  -5   -2.20    7.10
   3   3   5   -3.60    2.90
   3   3   5    1.00    6.00
   3   3   5   -4.00    5.20
  -4  -3  -5   -6.90    3.30
  -4  -3  -5    2.20    8.20
  -4  -3  -5   -6.60    4.20
   4   3   5    6.90    6.90
   4   3   5   -2.70    5.00
  -5  -3  -5   -1.80    7.00
  -5  -3  -5   -7.30    3.00
  -5  -3  -5   -5.20    4.30
   5   3   5   -2.10    5.00
  -6  -3  -5   -4.20    3.00
  -6  -3  -5   -0.40    8.10
  -6  -3  -5    0.40    4.40
  -7  -3  -5    2.80    4.20
  -7  -3  -5   -3.00    8.40
  -7  -3  -5   -8.80    7.20
  -7  -3  -5   -8.10    2.80
  -8  -3  -5   18.10   10.90
  -8  -3  -5   -5.50    3.00
  -8  -3  -5   -3.70    8.80
  -9  -3  -5   -0.70    3.70
  -9  -3  -5   21.10   12.80
  -9  -3  -5   10.00   12.70
 -10  -3  -5   -3.90    4.00
 -10  -3  -5    6.10   13.70
 -11  -3  -5   -7.40   11.20
 -11  -3  -5   -2.80    4.50
 -11  -3  -5    2.40   19.00
 -12  -3  -5   -0.30    4.30
 -12  -3  -5   -2.10   11.00
 -13  -3  -5   13.70    7.80
 -13  -3  -5   23.00   19.90
 -14  -3  -5   25.70   19.40
 -14  -3  -5   12.20    7.50
 -15  -3  -5   17.50    7.00
 -15  -3  -5  -31.50   14.60
 -16  -3  -5   29.10   15.70
 -16  -3  -5    5.00   21.00
 -17  -3  -5   24.50   24.70
  16  -4  -5   12.50   13.90
 -16   4   5   27.60   17.90
 -16   4   5   -0.70    9.70
  15  -4  -5   65.39   21.60
 -15   4   5   22.80   18.00
 -15   4   5   60.49   24.30
  14  -4  -5   36.70   20.50
 -14   4   5   78.39   28.00
 -14   4   5   32.10   17.20
  13  -4  -5   10.80   11.50
 -13   4   5   13.20   15.40
 -13   4   5   -6.40    6.70
  12  -4  -5    2.30    9.00
 -12   4   5   -4.80    6.30
 -12   4   5   -4.50   12.40
  11  -4  -5    4.60    9.20
 -11   4   5    3.40    6.40
 -11   4   5   11.00   10.50
  10  -4  -5   61.39   21.00
  10  -4  -5   74.09   31.70
 -10   4   5   41.60   22.30
 -10   4   5   34.70   18.30
   9  -4  -5   21.50   13.10
   9  -4  -5   48.90   26.70
  -9   4   5   29.90   15.70
  -9   4   5   23.60   11.60
   8  -4  -5   79.49   29.60
   8  -4  -5   40.50   18.50
  -8   4   5   38.90   20.00
  -8   4   5   40.40   17.80
   7  -4  -5   99.69   34.50
   7  -4  -5   96.49   40.00
   7  -4  -5   87.39   34.20
  -7   4   5   73.49   33.50
  -7   4   5   85.99   34.90
   6  -4  -5   51.49   20.50
   6  -4  -5   14.60    9.70
   6  -4  -5   12.40    9.80
  -6   4   5   17.60    9.10
  -6   4   5   22.90   10.60
   5  -4  -5  188.58   70.39
   5  -4  -5  196.08   72.89
  -5   4   5  186.88   70.49
  -5   4   5  186.58   70.39
   4  -4  -5  144.09   42.60
   4  -4  -5  102.29   36.60
  -4   4   5   79.39   35.30
  -4   4   5  112.49   36.10
   3  -4  -5  182.38   74.79
   3  -4  -5  262.17   78.49
  -3   4   5  191.68   74.69
   2  -4  -5  124.39   52.19
   2  -4  -5  137.59   53.99
  -2   4   5  155.18   52.19
  -2   4   5  135.89   53.69
   1  -4  -5  141.19   53.29
   1  -4  -5  133.09   51.49
  -1   4   5  125.59   51.29
  -1   4   5  171.68   56.79
   0  -4  -5    2.60   14.70
   0  -4  -5    4.00    6.20
   0  -4  -5    2.90    4.80
   0   4   5    4.20    5.60
   0   4   5    0.70   13.70
  -1  -4  -5  137.29   51.29
  -1  -4  -5  119.19   50.29
  -1  -4  -5  160.68   50.59
   1   4   5  128.19   50.39
   1   4   5  137.09   50.19
   1   4   5  160.28   50.99
   1   4   5  113.39   49.80
  -2  -4  -5  148.79   52.99
  -2  -4  -5  134.59   53.59
  -2  -4  -5  154.48   53.39
  -2  -4  -5  138.79   53.59
   2   4   5  136.69   53.29
   2   4   5  141.79   53.39
   2   4   5  142.89   52.79
   2   4   5  137.09   53.49
  -3  -4  -5  200.58   66.49
  -3  -4  -5  172.18   66.19
  -3  -4  -5  194.88   67.09
  -3  -4  -5  180.78   66.09
   3   4   5  200.98   66.89
   3   4   5  187.28   66.59
   3   4   5  148.49   66.19
  -4  -4  -5   82.09   35.50
  -4  -4  -5  117.39   36.60
  -4  -4  -5   96.89   37.70
  -5  -4  -5  196.68   69.99
  -5  -4  -5  183.08   68.49
  -5  -4  -5  177.58   68.69
  -6  -4  -5   27.10   10.30
  -6  -4  -5   14.60   13.70
  -6  -4  -5   18.80    9.20
  -7  -4  -5  108.19   33.10
  -7  -4  -5   72.89   35.60
  -7  -4  -5   73.99   32.10
  -8  -4  -5   51.39   17.60
  -8  -4  -5   66.59   23.40
  -8  -4  -5   30.10   16.70
  -9  -4  -5   23.10   17.00
  -9  -4  -5   25.00   10.80
 -10  -4  -5   25.60   19.50
 -10  -4  -5   28.10   12.10
 -11  -4  -5   11.00    6.20
 -11  -4  -5   -6.50   10.90
 -12  -4  -5   17.80   18.70
 -12  -4  -5    0.40    5.30
 -13  -4  -5   35.50   11.10
 -13  -4  -5   -7.80   17.00
 -14  -4  -5   40.90   26.10
 -14  -4  -5   34.30   15.10
 -15  -4  -5   51.19   28.90
 -15  -4  -5   31.70   15.20
 -16  -4  -5   19.30   10.20
 -16  -4  -5   25.50   20.80
  16  -5  -5   -9.20   11.60
 -16   5   5   -5.80   11.60
  15  -5  -5   -3.30   12.10
 -15   5   5  -14.50   12.40
 -15   5   5  -10.80    7.40
  14  -5  -5   27.10   12.80
 -14   5   5   -0.30    8.30
 -14   5   5   -5.80   11.60
  13  -5  -5  -12.90    8.30
 -13   5   5    1.90   12.60
 -13   5   5   -5.00    7.50
  12  -5  -5   -8.30    9.40
 -12   5   5   -2.10    7.00
 -12   5   5    5.60   11.10
  11  -5  -5   -0.60    8.40
 -11   5   5    4.30   10.80
 -11   5   5   -8.60    5.20
  10  -5  -5   -9.80    6.80
 -10   5   5    0.50    6.00
 -10   5   5   -3.50    9.90
   9  -5  -5    9.80    8.70
   9  -5  -5  -27.00   15.60
  -9   5   5    1.00    9.00
  -9   5   5   -2.10    5.50
   8  -5  -5  -16.10   18.00
   8  -5  -5    2.30    7.20
  -8   5   5   -4.00    5.40
  -8   5   5   -7.20    7.40
   7  -5  -5   -7.00    5.50
   7  -5  -5  -11.70   14.70
  -7   5   5    3.90    7.00
  -7   5   5    0.00    5.30
   6  -5  -5   15.10   16.80
   6  -5  -5   -5.10    5.70
  -6   5   5   11.60    6.30
  -6   5   5   -4.00    4.90
   5  -5  -5    1.40    6.00
   5  -5  -5   -2.70   16.40
  -5   5   5    5.50    4.80
  -5   5   5   -0.60    4.90
   4  -5  -5    0.20    5.90
   4  -5  -5   -9.20   15.50
   3  -5  -5   -9.40   13.50
   3  -5  -5    1.60    5.90
   2  -5  -5   -8.50    5.70
   1  -5  -5    6.60   15.00
   1  -5  -5   -5.60    5.70
  -1   5   5   -2.60   15.10
   0  -5  -5    5.40   13.50
   0  -5  -5   -1.20    6.40
   0  -5  -5    3.70    5.10
   0   5   5   -1.20   17.20
  -1  -5  -5    3.80    6.70
  -1  -5  -5   -2.80    5.40
  -1  -5  -5    7.60   12.60
   1   5   5   -8.80   12.50
   1   5   5    2.50    5.00
  -2  -5  -5   -8.00    8.50
  -2  -5  -5   -5.30    6.00
  -2  -5  -5   -2.20    5.90
   2   5   5   -3.80    8.60
   2   5   5    0.70    5.70
  -3  -5  -5   -3.30    6.30
  -3  -5  -5  -10.30    7.80
  -3  -5  -5   -2.30    4.00
  -3  -5  -5    0.80    6.00
   3   5   5   10.00    6.80
   3   5   5   -1.60    8.60
  -4  -5  -5   -0.20    7.40
  -4  -5  -5   -8.20    3.50
  -4  -5  -5    5.70    6.20
  -5  -5  -5    5.60    8.40
  -5  -5  -5   -2.70    3.90
  -5  -5  -5   -3.70    4.40
  -6  -5  -5   -9.00    4.90
  -6  -5  -5   10.00    9.60
  -6  -5  -5   -2.30    3.50
  -7  -5  -5    0.40    5.00
  -7  -5  -5    2.50   10.20
  -7  -5  -5   -5.10    4.00
  -8  -5  -5  -18.30    9.30
  -8  -5  -5    0.10    4.30
  -8  -5  -5    5.30    5.60
  -9  -5  -5  -11.30    3.90
  -9  -5  -5   -8.20    9.10
 -10  -5  -5   -2.60    7.60
 -11  -5  -5   14.60   17.10
 -11  -5  -5   -0.90    4.90
 -12  -5  -5  -29.30   10.50
 -12  -5  -5    0.70    5.50
 -13  -5  -5  -16.80   14.50
 -13  -5  -5    2.20    5.60
 -14  -5  -5    5.30   16.30
 -14  -5  -5   12.20    7.60
 -15  -5  -5   17.20    8.60
 -15  -5  -5    0.70   16.80
 -16  -5  -5   38.90   13.30
 -16  -5  -5   -5.30   20.60
  16  -6  -5  -15.80   13.90
 -16   6   5  -20.40    8.90
  15  -6  -5   -4.70   13.70
 -15   6   5   35.00   18.70
 -15   6   5  -25.70    8.50
  14  -6  -5   44.30   16.40
 -14   6   5   -4.60   23.30
 -14   6   5   19.30   12.80
  13  -6  -5    9.30   15.50
 -13   6   5   37.00   17.00
 -13   6   5   -1.70    7.90
  12  -6  -5   11.10   12.50
 -12   6   5   17.90   14.90
 -12   6   5    7.20    8.40
  11  -6  -5   -6.00    8.80
 -11   6   5    6.40    6.70
 -11   6   5   -1.10    9.70
  10  -6  -5    4.60    8.80
 -10   6   5   -2.50    8.60
   9  -6  -5   84.59   34.20
   9  -6  -5  187.98   60.49
  -9   6   5   69.29   33.10
  -9   6   5   88.29   34.80
   8  -6  -5   -3.90    7.00
   8  -6  -5  -16.20   20.40
  -8   6   5    3.40    6.40
  -8   6   5    7.00    7.80
   7  -6  -5  213.18   81.29
   7  -6  -5  190.08   77.99
  -7   6   5  210.08   77.79
  -7   6   5  215.68   77.79
   6  -6  -5    9.00    8.30
   6  -6  -5   24.00   19.60
  -6   6   5    0.40    5.40
  -6   6   5    8.20    6.40
   5  -6  -5  247.68   65.19
   5  -6  -5  154.18   57.69
  -5   6   5  124.09   56.29
   4  -6  -5  180.78   79.69
   4  -6  -5  265.47   82.39
   3  -6  -5  184.98   66.49
   3  -6  -5  159.98   64.29
   2  -6  -5  129.09   43.60
   2  -6  -5   82.79   37.90
   1  -6  -5  191.98   65.29
   1  -6  -5  149.39   63.59
   0  -6  -5    5.20    7.60
   0  -6  -5    7.30    5.30
   0  -6  -5    3.40   13.80
   0   6   5    9.70   15.60
   0   6   5    3.80    4.80
  -1  -6  -5  166.38   60.79
  -1  -6  -5  169.58   60.09
  -1  -6  -5  135.59   59.69
   1   6   5  177.78   61.69
   1   6   5  160.58   59.69
  -2  -6  -5   78.79   36.90
  -2  -6  -5   82.99   37.00
  -2  -6  -5  121.89   38.60
   2   6   5   93.19   37.00
[truncated: 1,838,270 more chars]
