# Supplementary material for: Chiral Polymers from Norbornenes Based on Renewable Chemical Feedstocks
Source: Polymers (Basel). 2022 Dec 13;14(24):5453. doi: 10.3390/polym14245453 (PMC9786787; doi:10.3390/polym14245453)
Supplement: Supplementary file 1 [file polymers-14-05453-s001.zip › NZR3711.cif]

data_NZR3711
_audit_creation_date               2022-10-16
_audit_creation_method
;
Olex2 1.3
(compiled 2020.11.12 svn.r5f609507 for OlexSys, GUI svn.r6408)
;
_shelxl_version_number             2014/6
_audit_contact_author_address      ?
_audit_contact_author_email        ?
_audit_contact_author_name         ''
_audit_contact_author_phone        ?
_publ_contact_author_id_orcid      ?
_publ_section_references
;
Dolomanov, O.V., Bourhis, L.J., Gildea, R.J, Howard, J.A.K. & Puschmann, H.
 (2009), J. Appl. Cryst. 42, 339-341.

Sheldrick, G.M. (2008). Acta Cryst. A64, 112-122.

Sheldrick, G.M. (2015). Acta Cryst. A71, 3-8.
;
_chemical_name_common              ?
_chemical_name_systematic          ?
_chemical_formula_moiety           'C29 H46 O4'
_chemical_formula_sum              'C29 H46 O4'
_chemical_formula_weight           458.66
_chemical_absolute_configuration   rm
_chemical_melting_point            ?
loop_
  _atom_type_symbol
  _atom_type_description
  _atom_type_scat_dispersion_real
  _atom_type_scat_dispersion_imag
  _atom_type_scat_source
 'C' 'C' 0.0181 0.0091 'International Tables Vol C Tables 4.2.6.8 and 6.1.1.4'
 'H' 'H' 0.0000 0.0000 'International Tables Vol C Tables 4.2.6.8 and 6.1.1.4'
 'O' 'O' 0.0492 0.0322 'International Tables Vol C Tables 4.2.6.8 and 6.1.1.4'

_shelx_space_group_comment
;
The symmetry employed for this shelxl refinement is uniquely defined
by the following loop, which should always be used as a source of
symmetry information in preference to the above space-group names.
They are only intended as comments.
;
_space_group_crystal_system        'monoclinic'
_space_group_IT_number             5
_space_group_name_H-M_alt          'C 1 2 1'
_space_group_name_Hall             'C 2y'
loop_
  _space_group_symop_operation_xyz
 'x, y, z'
 '-x, y, -z'
 'x+1/2, y+1/2, z'
 '-x+1/2, y+1/2, -z'

_cell_length_a                     23.4647(18)
_cell_length_b                     5.7765(4)
_cell_length_c                     21.9950(17)
_cell_angle_alpha                  90
_cell_angle_beta                   115.155(4)
_cell_angle_gamma                  90
_cell_volume                       2698.5(4)
_cell_formula_units_Z              4
_cell_measurement_reflns_used      7606
_cell_measurement_temperature      120.15
_cell_measurement_theta_max        67.47
_cell_measurement_theta_min        2.22
_shelx_estimated_absorpt_T_max     0.978
_shelx_estimated_absorpt_T_min     0.945
_exptl_absorpt_coefficient_mu      0.571
_exptl_absorpt_correction_T_max    0.7530
_exptl_absorpt_correction_T_min    0.5124
_exptl_absorpt_correction_type     multi-scan
_exptl_absorpt_process_details
;
SADABS-2008/1 (Bruker,2008) was used for absorption correction.
wR2(int) was 0.1489 before and 0.0893 after correction.
The Ratio of minimum to maximum transmission is 0.6805.
The \l/2 correction factor is Not present.
;
_exptl_absorpt_special_details     ?
_exptl_crystal_colour              colourless
_exptl_crystal_colour_lustre       .
_exptl_crystal_colour_modifier     .
_exptl_crystal_colour_primary      colourless
_exptl_crystal_density_diffrn      1.129
_exptl_crystal_density_meas        .
_exptl_crystal_density_method      ?
_exptl_crystal_description         needle
_exptl_crystal_F_000               1008
_exptl_crystal_size_max            0.1
_exptl_crystal_size_mid            0.05
_exptl_crystal_size_min            0.04
_exptl_transmission_factor_max     ?
_exptl_transmission_factor_min     ?
_diffrn_reflns_av_R_equivalents    0.0965
_diffrn_reflns_av_unetI/netI       0.1217
_diffrn_reflns_Laue_measured_fraction_full  0.909
_diffrn_reflns_Laue_measured_fraction_max  0.965
_diffrn_reflns_limit_h_max         27
_diffrn_reflns_limit_h_min         -24
_diffrn_reflns_limit_k_max         6
_diffrn_reflns_limit_k_min         -6
_diffrn_reflns_limit_l_max         24
_diffrn_reflns_limit_l_min         -25
_diffrn_reflns_number              12573
_diffrn_reflns_point_group_measured_fraction_full  0.914
_diffrn_reflns_point_group_measured_fraction_max  0.972
_diffrn_reflns_theta_full          67.679
_diffrn_reflns_theta_max           64.951
_diffrn_reflns_theta_min           2.219
_diffrn_ambient_temperature        120.15
_diffrn_detector_area_resol_mean   ?
_diffrn_measured_fraction_theta_full  0.909
_diffrn_measured_fraction_theta_max  0.965
_diffrn_measurement_device_type    'Bruker APEX-II DUO CCD'
_diffrn_measurement_method         '\f and \w scans'
_diffrn_radiation_monochromator    'graphite'
_diffrn_radiation_type             CuK\a
_diffrn_radiation_wavelength       1.54178
_diffrn_source                     ?
_diffrn_source_current             0.64
_diffrn_source_power               0.0285376
_diffrn_source_voltage             44.59
_diffrn_standards_number           0
_reflns_Friedel_coverage           0.815
_reflns_Friedel_fraction_full      0.921
_reflns_Friedel_fraction_max       0.980
_reflns_number_gt                  3131
_reflns_number_total               4051
_reflns_special_details
;
 Reflections were merged by SHELXL according to the crystal
 class for the calculation of statistics and refinement.
 
 _reflns_Friedel_fraction is defined as the number of unique
 Friedel pairs measured divided by the number that would be
 possible theoretically, ignoring centric projections and
 systematic absences.
;
_reflns_threshold_expression       'I > 2\s(I)'
_computing_cell_refinement         ?
_computing_data_collection         ?
_computing_data_reduction          ?
_computing_molecular_graphics      'Olex2 1.3 (Dolomanov et al., 2009)'
_computing_publication_material    'Olex2 1.3 (Dolomanov et al., 2009)'
_computing_structure_refinement    'XL  (Sheldrick, 2008)'
_computing_structure_solution      'SHELXT 2014/4 (Sheldrick, 2014)'
_refine_diff_density_max           0.289
_refine_diff_density_min           -0.256
_refine_diff_density_rms           0.065
_refine_ls_abs_structure_details
;
 Refined as an inversion twin.
;
_refine_ls_abs_structure_Flack     0.0(4)
_refine_ls_extinction_coef         0.0018(3)
_refine_ls_extinction_expression  
 'Fc^*^=kFc[1+0.001xFc^2^\l^3^/sin(2\q)]^-1/4^'
_refine_ls_extinction_method       SHELXL
_refine_ls_goodness_of_fit_ref     1.069
_refine_ls_hydrogen_treatment      constr
_refine_ls_matrix_type             full
_refine_ls_number_parameters       306
_refine_ls_number_reflns           4051
_refine_ls_number_restraints       1
_refine_ls_R_factor_all            0.0927
_refine_ls_R_factor_gt             0.0499
_refine_ls_restrained_S_all        1.069
_refine_ls_shift/su_max            0.000
_refine_ls_shift/su_mean           0.000
_refine_ls_structure_factor_coef   Fsqd
_refine_ls_weighting_details      
 'w=1/[\s^2^(Fo^2^)+(0.0743P)^2^+0.6421P] where P=(Fo^2^+2Fc^2^)/3'
_refine_ls_weighting_scheme        calc
_refine_ls_wR_factor_gt            0.1280
_refine_ls_wR_factor_ref           0.1461
_refine_special_details
;
 Refined as a 2-component inversion twin.
;
_olex2_refinement_description
;
1. Twinned data refinement
 Scales: 1.0(4)
 0.0(4)
2. Fixed Uiso
 At 1.2 times of:
  All C(H) groups, All C(H,H) groups
 At 1.5 times of:
  All C(H,H,H) groups
3.a Ternary CH refined with riding coordinates:
 C1(H1), C2(H2), C3(H3), C6(H6), C9(H9), C10(H10), C13(H13), C15(H15),
 C20(H20), C21(H21), C24(H24), C26(H26)
3.b Secondary CH2 refined with riding coordinates:
 C7(H7A,H7B), C11(H11A,H11B), C12(H12A,H12B), C14(H14A,H14B), C22(H22A,H22B),
 C23(H23A,H23B), C25(H25A,H25B)
3.c Aromatic/amide H refined with riding coordinates:
 C4(H4), C5(H5)
3.d Idealised Me refined as rotating group:
 C16(H16A,H16B,H16C), C17(H17A,H17B,H17C), C18(H18A,H18B,H18C), C27(H27A,H27B,
 H27C), C28(H28A,H28B,H28C), C29(H29A,H29B,H29C)
;
_atom_sites_solution_hydrogens     geom
_atom_sites_solution_primary       dual
_atom_sites_solution_secondary     ?
loop_
  _atom_site_label
  _atom_site_type_symbol
  _atom_site_fract_x
  _atom_site_fract_y
  _atom_site_fract_z
  _atom_site_U_iso_or_equiv
  _atom_site_adp_type
  _atom_site_occupancy
  _atom_site_site_symmetry_order
  _atom_site_calc_flag
  _atom_site_refinement_flags_posn
  _atom_site_refinement_flags_adp
  _atom_site_refinement_flags_occupancy
  _atom_site_disorder_assembly
  _atom_site_disorder_group
 O1 O 0.36984(11) 0.4013(5) 0.16399(13) 0.0301(8) Uani 1 1 d . . . . .
 O2 O 0.38455(12) 0.5509(6) 0.07647(13) 0.0353(8) Uani 1 1 d . . . . .
 O3 O 0.56363(12) 0.3277(6) 0.29545(12) 0.0308(7) Uani 1 1 d . . . . .
 O4 O 0.49961(12) 0.5749(6) 0.21640(13) 0.0290(7) Uani 1 1 d . . . . .
 C1 C 0.49676(17) 0.1657(8) 0.19205(19) 0.0290(11) Uani 1 1 d . . . . .
 H1 H 0.4934 0.0369 0.2193 0.035 Uiso 1 1 calc R U . . .
 C2 C 0.43403(17) 0.1905(9) 0.12610(19) 0.0283(11) Uani 1 1 d . . . . .
 H2 H 0.4076 0.0572 0.1245 0.034 Uiso 1 1 calc R U . . .
 C3 C 0.45636(18) 0.1546(8) 0.0697(2) 0.0317(11) Uani 1 1 d . . . . .
 H3 H 0.4232 0.1226 0.0248 0.038 Uiso 1 1 calc R U . . .
 C4 C 0.49948(19) 0.3524(9) 0.0744(2) 0.0346(11) Uani 1 1 d . . . . .
 H4 H 0.4902 0.4753 0.0443 0.042 Uiso 1 1 calc R U . . .
 C5 C 0.55317(19) 0.3223(9) 0.1286(2) 0.0350(11) Uani 1 1 d . . . . .
 H5 H 0.5885 0.4174 0.1431 0.042 Uiso 1 1 calc R U . . .
 C6 C 0.54584(17) 0.1049(8) 0.16209(19) 0.0296(11) Uani 1 1 d . . . . .
 H6 H 0.5850 0.0311 0.1932 0.035 Uiso 1 1 calc R U . . .
 C7 C 0.50426(18) -0.0385(8) 0.1013(2) 0.0331(11) Uani 1 1 d . . . . .
 H7A H 0.4863 -0.1729 0.1132 0.040 Uiso 1 1 calc R U . . .
 H7B H 0.5255 -0.0841 0.0738 0.040 Uiso 1 1 calc R U . . .
 C8 C 0.39492(17) 0.4035(9) 0.1188(2) 0.0326(11) Uani 1 1 d . . . . .
 C9 C 0.33550(17) 0.6037(8) 0.1690(2) 0.0287(11) Uani 1 1 d . . . . .
 H9 H 0.3302 0.7105 0.1323 0.034 Uiso 1 1 calc R U . . .
 C10 C 0.27104(17) 0.5322(8) 0.1629(2) 0.0307(11) Uani 1 1 d . . . . .
 H10 H 0.2779 0.4246 0.1998 0.037 Uiso 1 1 calc R U . . .
 C11 C 0.2385(2) 0.7469(9) 0.1746(2) 0.0383(12) Uani 1 1 d . . . . .
 H11A H 0.2308 0.8571 0.1386 0.046 Uiso 1 1 calc R U . . .
 H11B H 0.1981 0.7022 0.1730 0.046 Uiso 1 1 calc R U . . .
 C12 C 0.27754(19) 0.8634(9) 0.2417(2) 0.0373(12) Uani 1 1 d . . . . .
 H12A H 0.2820 0.7584 0.2779 0.045 Uiso 1 1 calc R U . . .
 H12B H 0.2557 1.0006 0.2460 0.045 Uiso 1 1 calc R U . . .
 C13 C 0.34276(19) 0.9314(9) 0.2481(2) 0.0359(11) Uani 1 1 d . . . . .
 H13 H 0.3371 1.0452 0.2129 0.043 Uiso 1 1 calc R U . . .
 C14 C 0.37454(19) 0.7213(9) 0.2355(2) 0.0339(11) Uani 1 1 d . . . . .
 H14A H 0.3831 0.6109 0.2715 0.041 Uiso 1 1 calc R U . . .
 H14B H 0.4146 0.7677 0.2362 0.041 Uiso 1 1 calc R U . . .
 C15 C 0.23149(18) 0.4033(9) 0.0973(2) 0.0337(11) Uani 1 1 d . . . . .
 H15 H 0.2555 0.2656 0.0963 0.040 Uiso 1 1 calc R U . . .
 C16 C 0.21899(19) 0.5422(10) 0.0335(2) 0.0420(13) Uani 1 1 d . . . . .
 H16A H 0.1983 0.6848 0.0343 0.063 Uiso 1 1 calc R U . . .
 H16B H 0.1926 0.4536 -0.0052 0.063 Uiso 1 1 calc R U . . .
 H16C H 0.2582 0.5751 0.0314 0.063 Uiso 1 1 calc R U . . .
 C17 C 0.16889(19) 0.3179(9) 0.0959(2) 0.0405(12) Uani 1 1 d . . . . .
 H17A H 0.1479 0.2205 0.0574 0.061 Uiso 1 1 calc R U . . .
 H17B H 0.1426 0.4483 0.0933 0.061 Uiso 1 1 calc R U . . .
 H17C H 0.1770 0.2314 0.1360 0.061 Uiso 1 1 calc R U . . .
 C18 C 0.3824(2) 1.0437(10) 0.3155(2) 0.0504(14) Uani 1 1 d . . . . .
 H18A H 0.3906 0.9330 0.3508 0.076 Uiso 1 1 calc R U . . .
 H18B H 0.3601 1.1736 0.3221 0.076 Uiso 1 1 calc R U . . .
 H18C H 0.4216 1.0954 0.3162 0.076 Uiso 1 1 calc R U . . .
 C19 C 0.51716(17) 0.3813(9) 0.23352(19) 0.0267(10) Uani 1 1 d . . . . .
 C20 C 0.59432(18) 0.5289(8) 0.33720(19) 0.0282(10) Uani 1 1 d . . . . .
 H20 H 0.5626 0.6497 0.3292 0.034 Uiso 1 1 calc R U . . .
 C21 C 0.62048(18) 0.4577(8) 0.41035(19) 0.0305(11) Uani 1 1 d . . . . .
 H21 H 0.6531 0.3415 0.4175 0.037 Uiso 1 1 calc R U . . .
 C22 C 0.6533(2) 0.6686(9) 0.4527(2) 0.0357(11) Uani 1 1 d . . . . .
 H22A H 0.6220 0.7859 0.4476 0.043 Uiso 1 1 calc R U . . .
 H22B H 0.6730 0.6239 0.4997 0.043 Uiso 1 1 calc R U . . .
 C23 C 0.7030(2) 0.7716(9) 0.4333(2) 0.0378(12) Uani 1 1 d . . . . .
 H23A H 0.7369 0.6610 0.4437 0.045 Uiso 1 1 calc R U . . .
 H23B H 0.7203 0.9095 0.4600 0.045 Uiso 1 1 calc R U . . .
 C24 C 0.67649(18) 0.8342(9) 0.3590(2) 0.0339(11) Uani 1 1 d . . . . .
 H24 H 0.6446 0.9550 0.3502 0.041 Uiso 1 1 calc R U . . .
 C25 C 0.64405(18) 0.6209(9) 0.3172(2) 0.0333(11) Uani 1 1 d . . . . .
 H25A H 0.6248 0.6620 0.2699 0.040 Uiso 1 1 calc R U . . .
 H25B H 0.6752 0.5014 0.3236 0.040 Uiso 1 1 calc R U . . .
 C26 C 0.57114(18) 0.3438(9) 0.4300(2) 0.0368(11) Uani 1 1 d . . . . .
 H26 H 0.5548 0.2083 0.4009 0.044 Uiso 1 1 calc R U . . .
 C27 C 0.5153(2) 0.5005(11) 0.4178(2) 0.0517(15) Uani 1 1 d . . . . .
 H27A H 0.5294 0.6350 0.4460 0.078 Uiso 1 1 calc R U . . .
 H27B H 0.4851 0.4183 0.4283 0.078 Uiso 1 1 calc R U . . .
 H27C H 0.4962 0.5472 0.3716 0.078 Uiso 1 1 calc R U . . .
 C28 C 0.6004(2) 0.2558(10) 0.5024(2) 0.0428(13) Uani 1 1 d . . . . .
 H28A H 0.6375 0.1674 0.5101 0.064 Uiso 1 1 calc R U . . .
 H28B H 0.5707 0.1597 0.5099 0.064 Uiso 1 1 calc R U . . .
 H28C H 0.6115 0.3851 0.5326 0.064 Uiso 1 1 calc R U . . .
 C29 C 0.7269(2) 0.9277(10) 0.3396(2) 0.0501(14) Uani 1 1 d . . . . .
 H29A H 0.7593 0.8133 0.3491 0.075 Uiso 1 1 calc R U . . .
 H29B H 0.7448 1.0654 0.3649 0.075 Uiso 1 1 calc R U . . .
 H29C H 0.7085 0.9633 0.2925 0.075 Uiso 1 1 calc R U . . .

loop_
  _atom_site_aniso_label
  _atom_site_aniso_U_11
  _atom_site_aniso_U_22
  _atom_site_aniso_U_33
  _atom_site_aniso_U_23
  _atom_site_aniso_U_13
  _atom_site_aniso_U_12
 O1 0.0302(13) 0.031(2) 0.0356(16) 0.0021(14) 0.0201(12) 0.0015(14)
 O2 0.0345(14) 0.045(2) 0.0292(16) 0.0101(16) 0.0164(12) 0.0049(16)
 O3 0.0322(13) 0.032(2) 0.0251(14) -0.0013(14) 0.0095(11) 0.0000(15)
 O4 0.0326(14) 0.022(2) 0.0321(15) 0.0014(14) 0.0136(11) 0.0025(15)
 C1 0.030(2) 0.031(3) 0.029(2) -0.001(2) 0.0149(17) 0.001(2)
 C2 0.0231(18) 0.035(3) 0.028(2) -0.0045(19) 0.0116(16) -0.0052(19)
 C3 0.031(2) 0.038(3) 0.027(2) -0.004(2) 0.0129(17) 0.002(2)
 C4 0.045(2) 0.037(3) 0.035(2) 0.002(2) 0.029(2) 0.001(2)
 C5 0.034(2) 0.041(3) 0.040(2) -0.006(2) 0.0259(19) -0.007(2)
 C6 0.0266(18) 0.032(3) 0.031(2) -0.007(2) 0.0134(16) 0.000(2)
 C7 0.035(2) 0.035(3) 0.035(2) -0.005(2) 0.0193(18) 0.003(2)
 C8 0.0237(18) 0.051(4) 0.026(2) -0.005(2) 0.0135(16) -0.004(2)
 C9 0.0311(19) 0.027(3) 0.032(2) 0.002(2) 0.0180(16) 0.006(2)
 C10 0.0315(19) 0.033(3) 0.032(2) 0.006(2) 0.0178(17) 0.003(2)
 C11 0.034(2) 0.042(4) 0.046(3) 0.002(2) 0.023(2) 0.004(2)
 C12 0.041(2) 0.036(3) 0.043(3) -0.002(2) 0.027(2) 0.003(2)
 C13 0.040(2) 0.035(3) 0.039(2) 0.000(2) 0.0224(19) 0.000(2)
 C14 0.034(2) 0.033(3) 0.038(2) -0.001(2) 0.0184(18) 0.000(2)
 C15 0.0317(19) 0.038(3) 0.033(2) 0.001(2) 0.0156(17) 0.004(2)
 C16 0.031(2) 0.056(4) 0.038(2) 0.002(2) 0.0139(18) 0.004(2)
 C17 0.0295(19) 0.040(3) 0.050(3) 0.001(2) 0.0150(19) 0.001(2)
 C18 0.048(2) 0.049(4) 0.055(3) -0.020(3) 0.023(2) -0.002(3)
 C19 0.0280(18) 0.032(3) 0.026(2) -0.005(2) 0.0166(15) -0.006(2)
 C20 0.0322(19) 0.023(3) 0.029(2) -0.0053(19) 0.0121(16) -0.001(2)
 C21 0.0315(19) 0.035(3) 0.026(2) -0.0024(19) 0.0138(16) 0.000(2)
 C22 0.037(2) 0.042(3) 0.028(2) -0.003(2) 0.0133(18) 0.000(2)
 C23 0.038(2) 0.039(4) 0.031(2) -0.003(2) 0.0094(19) -0.007(2)
 C24 0.034(2) 0.035(3) 0.032(2) 0.000(2) 0.0120(17) 0.000(2)
 C25 0.033(2) 0.039(3) 0.026(2) -0.003(2) 0.0114(16) -0.001(2)
 C26 0.036(2) 0.043(3) 0.033(2) 0.002(2) 0.0168(17) -0.005(2)
 C27 0.038(2) 0.075(5) 0.047(3) 0.013(3) 0.023(2) 0.005(3)
 C28 0.048(3) 0.049(4) 0.035(2) 0.002(2) 0.021(2) -0.003(2)
 C29 0.051(3) 0.057(4) 0.039(3) 0.004(3) 0.016(2) -0.016(3)

_geom_special_details
;
 All esds (except the esd in the dihedral angle between two l.s. planes)
 are estimated using the full covariance matrix.  The cell esds are taken
 into account individually in the estimation of esds in distances, angles
 and torsion angles; correlations between esds in cell parameters are only
 used when they are defined by crystal symmetry.  An approximate (isotropic)
 treatment of cell esds is used for estimating esds involving l.s. planes.
;
loop_
  _geom_bond_atom_site_label_1
  _geom_bond_atom_site_label_2
  _geom_bond_distance
  _geom_bond_site_symmetry_2
  _geom_bond_publ_flag
 O1 C8 1.353(5) . ?
 O1 C9 1.451(5) . ?
 O2 C8 1.208(5) . ?
 O3 C19 1.370(5) . ?
 O3 C20 1.466(5) . ?
 O4 C19 1.196(5) . ?
 C1 H1 0.9800 . ?
 C1 C2 1.573(5) . ?
 C1 C6 1.590(5) . ?
 C1 C19 1.497(6) . ?
 C2 H2 0.9800 . ?
 C2 C3 1.553(6) . ?
 C2 C8 1.503(7) . ?
 C3 H3 0.9800 . ?
 C3 C4 1.500(6) . ?
 C3 C7 1.526(6) . ?
 C4 H4 0.9300 . ?
 C4 C5 1.328(6) . ?
 C5 H5 0.9300 . ?
 C5 C6 1.502(7) . ?
 C6 H6 0.9800 . ?
 C6 C7 1.522(6) . ?
 C7 H7A 0.9700 . ?
 C7 H7B 0.9700 . ?
 C9 H9 0.9800 . ?
 C9 C10 1.518(5) . ?
 C9 C14 1.516(6) . ?
 C10 H10 0.9800 . ?
 C10 C11 1.534(6) . ?
 C10 C15 1.535(6) . ?
 C11 H11A 0.9700 . ?
 C11 H11B 0.9700 . ?
 C11 C12 1.524(6) . ?
 C12 H12A 0.9700 . ?
 C12 H12B 0.9700 . ?
 C12 C13 1.528(6) . ?
 C13 H13 0.9800 . ?
 C13 C14 1.511(7) . ?
 C13 C18 1.521(6) . ?
 C14 H14A 0.9700 . ?
 C14 H14B 0.9700 . ?
 C15 H15 0.9800 . ?
 C15 C16 1.533(6) . ?
 C15 C17 1.537(6) . ?
 C16 H16A 0.9600 . ?
 C16 H16B 0.9600 . ?
 C16 H16C 0.9600 . ?
 C17 H17A 0.9600 . ?
 C17 H17B 0.9600 . ?
 C17 H17C 0.9600 . ?
 C18 H18A 0.9600 . ?
 C18 H18B 0.9600 . ?
 C18 H18C 0.9600 . ?
 C20 H20 0.9800 . ?
 C20 C21 1.515(5) . ?
 C20 C25 1.509(6) . ?
 C21 H21 0.9800 . ?
 C21 C22 1.528(6) . ?
 C21 C26 1.544(6) . ?
 C22 H22A 0.9700 . ?
 C22 H22B 0.9700 . ?
 C22 C23 1.522(6) . ?
 C23 H23A 0.9700 . ?
 C23 H23B 0.9700 . ?
 C23 C24 1.525(6) . ?
 C24 H24 0.9800 . ?
 C24 C25 1.533(7) . ?
 C24 C29 1.517(6) . ?
 C25 H25A 0.9700 . ?
 C25 H25B 0.9700 . ?
 C26 H26 0.9800 . ?
 C26 C27 1.520(6) . ?
 C26 C28 1.529(6) . ?
 C27 H27A 0.9600 . ?
 C27 H27B 0.9600 . ?
 C27 H27C 0.9600 . ?
 C28 H28A 0.9600 . ?
 C28 H28B 0.9600 . ?
 C28 H28C 0.9600 . ?
 C29 H29A 0.9600 . ?
 C29 H29B 0.9600 . ?
 C29 H29C 0.9600 . ?

loop_
  _geom_angle_atom_site_label_1
  _geom_angle_atom_site_label_2
  _geom_angle_atom_site_label_3
  _geom_angle
  _geom_angle_site_symmetry_1
  _geom_angle_site_symmetry_3
  _geom_angle_publ_flag
 C8 O1 C9 118.5(3) . . ?
 C19 O3 C20 114.5(3) . . ?
 C2 C1 H1 110.3 . . ?
 C2 C1 C6 101.3(3) . . ?
 C6 C1 H1 110.3 . . ?
 C19 C1 H1 110.3 . . ?
 C19 C1 C2 114.7(4) . . ?
 C19 C1 C6 109.6(3) . . ?
 C1 C2 H2 106.9 . . ?
 C3 C2 C1 102.9(3) . . ?
 C3 C2 H2 106.9 . . ?
 C8 C2 C1 117.5(4) . . ?
 C8 C2 H2 106.9 . . ?
 C8 C2 C3 115.0(4) . . ?
 C2 C3 H3 115.9 . . ?
 C4 C3 C2 106.9(4) . . ?
 C4 C3 H3 115.9 . . ?
 C4 C3 C7 100.4(3) . . ?
 C7 C3 C2 99.6(3) . . ?
 C7 C3 H3 115.9 . . ?
 C3 C4 H4 125.8 . . ?
 C5 C4 C3 108.5(4) . . ?
 C5 C4 H4 125.8 . . ?
 C4 C5 H5 126.6 . . ?
 C4 C5 C6 106.7(4) . . ?
 C6 C5 H5 126.6 . . ?
 C1 C6 H6 115.9 . . ?
 C5 C6 C1 105.8(4) . . ?
 C5 C6 H6 115.9 . . ?
 C5 C6 C7 100.9(3) . . ?
 C7 C6 C1 100.2(3) . . ?
 C7 C6 H6 115.9 . . ?
 C3 C7 H7A 112.9 . . ?
 C3 C7 H7B 112.9 . . ?
 C6 C7 C3 94.3(3) . . ?
 C6 C7 H7A 112.9 . . ?
 C6 C7 H7B 112.9 . . ?
 H7A C7 H7B 110.3 . . ?
 O1 C8 C2 110.5(4) . . ?
 O2 C8 O1 124.4(4) . . ?
 O2 C8 C2 124.9(3) . . ?
 O1 C9 H9 109.0 . . ?
 O1 C9 C10 109.8(4) . . ?
 O1 C9 C14 107.9(3) . . ?
 C10 C9 H9 109.0 . . ?
 C14 C9 H9 109.0 . . ?
 C14 C9 C10 112.3(3) . . ?
 C9 C10 H10 107.0 . . ?
 C9 C10 C11 108.2(4) . . ?
 C9 C10 C15 113.4(3) . . ?
 C11 C10 H10 107.0 . . ?
 C15 C10 H10 107.0 . . ?
 C15 C10 C11 113.8(3) . . ?
 C10 C11 H11A 109.1 . . ?
 C10 C11 H11B 109.1 . . ?
 H11A C11 H11B 107.8 . . ?
 C12 C11 C10 112.5(4) . . ?
 C12 C11 H11A 109.1 . . ?
 C12 C11 H11B 109.1 . . ?
 C11 C12 H12A 109.3 . . ?
 C11 C12 H12B 109.3 . . ?
 C11 C12 C13 111.6(3) . . ?
 H12A C12 H12B 108.0 . . ?
 C13 C12 H12A 109.3 . . ?
 C13 C12 H12B 109.3 . . ?
 C12 C13 H13 107.8 . . ?
 C14 C13 C12 109.3(4) . . ?
 C14 C13 H13 107.8 . . ?
 C14 C13 C18 112.1(4) . . ?
 C18 C13 C12 111.9(3) . . ?
 C18 C13 H13 107.8 . . ?
 C9 C14 H14A 108.9 . . ?
 C9 C14 H14B 108.9 . . ?
 C13 C14 C9 113.2(3) . . ?
 C13 C14 H14A 108.9 . . ?
 C13 C14 H14B 108.9 . . ?
 H14A C14 H14B 107.8 . . ?
 C10 C15 H15 107.0 . . ?
 C10 C15 C16 114.2(4) . . ?
 C10 C15 C17 111.5(3) . . ?
 C16 C15 H15 107.0 . . ?
 C16 C15 C17 109.9(3) . . ?
 C17 C15 H15 107.0 . . ?
 C15 C16 H16A 109.5 . . ?
 C15 C16 H16B 109.5 . . ?
 C15 C16 H16C 109.5 . . ?
 H16A C16 H16B 109.5 . . ?
 H16A C16 H16C 109.5 . . ?
 H16B C16 H16C 109.5 . . ?
 C15 C17 H17A 109.5 . . ?
 C15 C17 H17B 109.5 . . ?
 C15 C17 H17C 109.5 . . ?
 H17A C17 H17B 109.5 . . ?
 H17A C17 H17C 109.5 . . ?
 H17B C17 H17C 109.5 . . ?
 C13 C18 H18A 109.5 . . ?
 C13 C18 H18B 109.5 . . ?
 C13 C18 H18C 109.5 . . ?
 H18A C18 H18B 109.5 . . ?
 H18A C18 H18C 109.5 . . ?
 H18B C18 H18C 109.5 . . ?
 O3 C19 C1 109.3(4) . . ?
 O4 C19 O3 123.1(4) . . ?
 O4 C19 C1 127.4(4) . . ?
 O3 C20 H20 108.6 . . ?
 O3 C20 C21 108.6(3) . . ?
 O3 C20 C25 109.3(3) . . ?
 C21 C20 H20 108.6 . . ?
 C25 C20 H20 108.6 . . ?
 C25 C20 C21 113.0(3) . . ?
 C20 C21 H21 107.0 . . ?
 C20 C21 C22 107.6(4) . . ?
 C20 C21 C26 113.5(3) . . ?
 C22 C21 H21 107.0 . . ?
 C22 C21 C26 114.4(3) . . ?
 C26 C21 H21 107.0 . . ?
 C21 C22 H22A 109.0 . . ?
 C21 C22 H22B 109.0 . . ?
 H22A C22 H22B 107.8 . . ?
 C23 C22 C21 112.8(3) . . ?
 C23 C22 H22A 109.0 . . ?
 C23 C22 H22B 109.0 . . ?
 C22 C23 H23A 109.1 . . ?
 C22 C23 H23B 109.1 . . ?
 C22 C23 C24 112.4(3) . . ?
 H23A C23 H23B 107.9 . . ?
 C24 C23 H23A 109.1 . . ?
 C24 C23 H23B 109.1 . . ?
 C23 C24 H24 108.1 . . ?
 C23 C24 C25 109.0(4) . . ?
 C25 C24 H24 108.1 . . ?
 C29 C24 C23 112.0(3) . . ?
 C29 C24 H24 108.1 . . ?
 C29 C24 C25 111.4(4) . . ?
 C20 C25 C24 110.8(3) . . ?
 C20 C25 H25A 109.5 . . ?
 C20 C25 H25B 109.5 . . ?
 C24 C25 H25A 109.5 . . ?
 C24 C25 H25B 109.5 . . ?
 H25A C25 H25B 108.1 . . ?
 C21 C26 H26 106.9 . . ?
 C27 C26 C21 113.0(4) . . ?
 C27 C26 H26 106.9 . . ?
 C27 C26 C28 110.7(4) . . ?
 C28 C26 C21 112.0(3) . . ?
 C28 C26 H26 106.9 . . ?
 C26 C27 H27A 109.5 . . ?
 C26 C27 H27B 109.5 . . ?
 C26 C27 H27C 109.5 . . ?
 H27A C27 H27B 109.5 . . ?
 H27A C27 H27C 109.5 . . ?
 H27B C27 H27C 109.5 . . ?
 C26 C28 H28A 109.5 . . ?
 C26 C28 H28B 109.5 . . ?
 C26 C28 H28C 109.5 . . ?
 H28A C28 H28B 109.5 . . ?
 H28A C28 H28C 109.5 . . ?
 H28B C28 H28C 109.5 . . ?
 C24 C29 H29A 109.5 . . ?
 C24 C29 H29B 109.5 . . ?
 C24 C29 H29C 109.5 . . ?
 H29A C29 H29B 109.5 . . ?
 H29A C29 H29C 109.5 . . ?
 H29B C29 H29C 109.5 . . ?

loop_
  _geom_torsion_atom_site_label_1
  _geom_torsion_atom_site_label_2
  _geom_torsion_atom_site_label_3
  _geom_torsion_atom_site_label_4
  _geom_torsion
  _geom_torsion_site_symmetry_1
  _geom_torsion_site_symmetry_2
  _geom_torsion_site_symmetry_3
  _geom_torsion_site_symmetry_4
  _geom_torsion_publ_flag
 O1 C9 C10 C11 175.1(3) . . . . ?
 O1 C9 C10 C15 -57.6(4) . . . . ?
 O1 C9 C14 C13 -177.9(3) . . . . ?
 O3 C20 C21 C22 178.9(3) . . . . ?
 O3 C20 C21 C26 -53.5(5) . . . . ?
 O3 C20 C25 C24 179.1(3) . . . . ?
 C1 C2 C3 C4 -64.7(4) . . . . ?
 C1 C2 C3 C7 39.4(4) . . . . ?
 C1 C2 C8 O1 -68.0(4) . . . . ?
 C1 C2 C8 O2 115.5(5) . . . . ?
 C1 C6 C7 C3 58.8(4) . . . . ?
 C2 C1 C6 C5 69.9(4) . . . . ?
 C2 C1 C6 C7 -34.6(4) . . . . ?
 C2 C1 C19 O3 167.2(3) . . . . ?
 C2 C1 C19 O4 -16.7(6) . . . . ?
 C2 C3 C4 C5 72.1(4) . . . . ?
 C2 C3 C7 C6 -60.8(3) . . . . ?
 C3 C2 C8 O1 170.6(3) . . . . ?
 C3 C2 C8 O2 -5.9(6) . . . . ?
 C3 C4 C5 C6 -1.4(5) . . . . ?
 C4 C3 C7 C6 48.5(3) . . . . ?
 C4 C5 C6 C1 -70.2(4) . . . . ?
 C4 C5 C6 C7 33.8(4) . . . . ?
 C5 C6 C7 C3 -49.7(3) . . . . ?
 C6 C1 C2 C3 -2.9(5) . . . . ?
 C6 C1 C2 C8 -130.4(4) . . . . ?
 C6 C1 C19 O3 -79.7(4) . . . . ?
 C6 C1 C19 O4 96.5(5) . . . . ?
 C7 C3 C4 C5 -31.4(4) . . . . ?
 C8 O1 C9 C10 127.6(3) . . . . ?
 C8 O1 C9 C14 -109.8(4) . . . . ?
 C8 C2 C3 C4 64.3(4) . . . . ?
 C8 C2 C3 C7 168.4(3) . . . . ?
 C9 O1 C8 O2 -9.3(6) . . . . ?
 C9 O1 C8 C2 174.1(3) . . . . ?
 C9 C10 C11 C12 -56.0(4) . . . . ?
 C9 C10 C15 C16 -59.2(5) . . . . ?
 C9 C10 C15 C17 175.5(4) . . . . ?
 C10 C9 C14 C13 -56.9(5) . . . . ?
 C10 C11 C12 C13 57.0(5) . . . . ?
 C11 C10 C15 C16 65.1(4) . . . . ?
 C11 C10 C15 C17 -60.2(5) . . . . ?
 C11 C12 C13 C14 -54.2(5) . . . . ?
 C11 C12 C13 C18 -178.9(4) . . . . ?
 C12 C13 C14 C9 54.4(5) . . . . ?
 C14 C9 C10 C11 55.2(4) . . . . ?
 C14 C9 C10 C15 -177.5(4) . . . . ?
 C15 C10 C11 C12 177.0(4) . . . . ?
 C18 C13 C14 C9 179.1(4) . . . . ?
 C19 O3 C20 C21 154.3(3) . . . . ?
 C19 O3 C20 C25 -82.0(4) . . . . ?
 C19 C1 C2 C3 115.1(4) . . . . ?
 C19 C1 C2 C8 -12.4(5) . . . . ?
 C19 C1 C6 C5 -51.7(4) . . . . ?
 C19 C1 C6 C7 -156.2(4) . . . . ?
 C20 O3 C19 O4 -5.3(5) . . . . ?
 C20 O3 C19 C1 171.1(3) . . . . ?
 C20 C21 C22 C23 -54.6(5) . . . . ?
 C20 C21 C26 C27 -59.1(5) . . . . ?
 C20 C21 C26 C28 175.1(4) . . . . ?
 C21 C20 C25 C24 -59.8(5) . . . . ?
 C21 C22 C23 C24 55.5(5) . . . . ?
 C22 C21 C26 C27 64.9(5) . . . . ?
 C22 C21 C26 C28 -60.9(5) . . . . ?
 C22 C23 C24 C25 -54.0(5) . . . . ?
 C22 C23 C24 C29 -177.7(4) . . . . ?
 C23 C24 C25 C20 55.6(5) . . . . ?
 C25 C20 C21 C22 57.4(5) . . . . ?
 C25 C20 C21 C26 -175.0(4) . . . . ?
 C26 C21 C22 C23 178.2(4) . . . . ?
 C29 C24 C25 C20 179.7(4) . . . . ?

_shelx_res_file
;
TITL 1_a.res in C2
REM Old TITL 1 in C2
REM SHELXT solution in C2
REM R1 0.161, Rweak 0.040, Alpha 0.007, Orientation as input
REM Flack x = 0.097 ( 0.181 ) from Parsons' quotients
REM Formula found by SHELXT: C29 O4
CELL 1.54178 23.4647 5.7765 21.995 90 115.155 90
ZERR 4 0.0018 0.0004 0.0017 0 0.004 0
LATT -7
SYMM -X,+Y,-Z
SFAC C H O
UNIT 116 184 16

L.S. 10
PLAN  8
SIZE 0.1 0.04 0.05
TEMP 23
CONF
MORE -1
BOND $H
fmap 2
acta
TWIN -1 0 0 0 -1 0 0 0 -1 2
OMIT -4 130
OMIT -4 -4 19
REM <olex2.extras>
REM <HklSrc "%.\\1_a.hkl">
REM </olex2.extras>

WGHT    0.074300    0.642100
EXTI    0.001794
BASF   0.03501
FVAR       0.52429
O1    3    0.369841    0.401267    0.163991    11.00000    0.03018    0.03091 =
         0.03565    0.00205    0.02005    0.00150
O2    3    0.384552    0.550856    0.076470    11.00000    0.03450    0.04507 =
         0.02919    0.01005    0.01638    0.00492
O3    3    0.563628    0.327688    0.295453    11.00000    0.03225    0.03223 =
         0.02508   -0.00127    0.00950   -0.00002
O4    3    0.499612    0.574936    0.216401    11.00000    0.03265    0.02210 =
         0.03214    0.00138    0.01356    0.00254
C1    1    0.496757    0.165732    0.192046    11.00000    0.02985    0.03088 =
         0.02873   -0.00094    0.01490    0.00141
AFIX  13
H1    2    0.493413    0.036901    0.219340    11.00000   -1.20000
AFIX   0
C2    1    0.434031    0.190487    0.126099    11.00000    0.02313    0.03474 =
         0.02781   -0.00447    0.01164   -0.00521
AFIX  13
H2    2    0.407601    0.057213    0.124542    11.00000   -1.20000
AFIX   0
C3    1    0.456364    0.154646    0.069666    11.00000    0.03132    0.03774 =
         0.02674   -0.00425    0.01292    0.00220
AFIX  13
H3    2    0.423206    0.122607    0.024810    11.00000   -1.20000
AFIX   0
C4    1    0.499478    0.352400    0.074357    11.00000    0.04501    0.03656 =
         0.03520    0.00214    0.02949    0.00149
AFIX  43
H4    2    0.490180    0.475296    0.044344    11.00000   -1.20000
AFIX   0
C5    1    0.553172    0.322282    0.128620    11.00000    0.03424    0.04139 =
         0.03988   -0.00552    0.02591   -0.00691
AFIX  43
H5    2    0.588472    0.417360    0.143089    11.00000   -1.20000
AFIX   0
C6    1    0.545840    0.104901    0.162094    11.00000    0.02662    0.03173 =
         0.03143   -0.00708    0.01335    0.00007
AFIX  13
H6    2    0.585022    0.031052    0.193184    11.00000   -1.20000
AFIX   0
C7    1    0.504259   -0.038509    0.101291    11.00000    0.03479    0.03451 =
         0.03468   -0.00454    0.01933    0.00287
AFIX  23
H7A   2    0.486340   -0.172920    0.113150    11.00000   -1.20000
H7B   2    0.525505   -0.084117    0.073770    11.00000   -1.20000
AFIX   0
C8    1    0.394917    0.403549    0.118826    11.00000    0.02368    0.05073 =
         0.02647   -0.00486    0.01353   -0.00366
C9    1    0.335498    0.603732    0.169012    11.00000    0.03115    0.02724 =
         0.03234    0.00222    0.01798    0.00578
AFIX  13
H9    2    0.330188    0.710451    0.132349    11.00000   -1.20000
AFIX   0
C10   1    0.271037    0.532167    0.162881    11.00000    0.03153    0.03305 =
         0.03212    0.00592    0.01784    0.00267
AFIX  13
H10   2    0.277916    0.424625    0.199815    11.00000   -1.20000
AFIX   0
C11   1    0.238510    0.746936    0.174554    11.00000    0.03385    0.04173 =
         0.04570    0.00168    0.02293    0.00435
AFIX  23
H11A  2    0.230844    0.857091    0.138625    11.00000   -1.20000
H11B  2    0.198073    0.702162    0.173006    11.00000   -1.20000
AFIX   0
C12   1    0.277538    0.863353    0.241736    11.00000    0.04148    0.03625 =
         0.04321   -0.00199    0.02675    0.00290
AFIX  23
H12A  2    0.282026    0.758401    0.277923    11.00000   -1.20000
H12B  2    0.255714    1.000590    0.246043    11.00000   -1.20000
AFIX   0
C13   1    0.342756    0.931413    0.248090    11.00000    0.03969    0.03476 =
         0.03911    0.00037    0.02244   -0.00007
AFIX  13
H13   2    0.337076    1.045150    0.212912    11.00000   -1.20000
AFIX   0
C14   1    0.374537    0.721276    0.235454    11.00000    0.03384    0.03257 =
         0.03849   -0.00098    0.01842   -0.00047
AFIX  23
H14A  2    0.383114    0.610911    0.271533    11.00000   -1.20000
H14B  2    0.414564    0.767720    0.236222    11.00000   -1.20000
AFIX   0
C15   1    0.231488    0.403346    0.097315    11.00000    0.03172    0.03791 =
         0.03345    0.00117    0.01563    0.00442
AFIX  13
H15   2    0.255455    0.265649    0.096276    11.00000   -1.20000
AFIX   0
C16   1    0.218991    0.542174    0.033494    11.00000    0.03079    0.05638 =
         0.03797    0.00239    0.01390    0.00352
AFIX 137
H16A  2    0.198309    0.684764    0.034303    11.00000   -1.50000
H16B  2    0.192613    0.453582   -0.005204    11.00000   -1.50000
H16C  2    0.258223    0.575123    0.031413    11.00000   -1.50000
AFIX   0
C17   1    0.168888    0.317863    0.095858    11.00000    0.02949    0.04034 =
         0.04969    0.00105    0.01496    0.00107
AFIX 137
H17A  2    0.147931    0.220452    0.057355    11.00000   -1.50000
H17B  2    0.142620    0.448311    0.093322    11.00000   -1.50000
H17C  2    0.177015    0.231437    0.135988    11.00000   -1.50000
AFIX   0
C18   1    0.382430    1.043692    0.315523    11.00000    0.04767    0.04944 =
         0.05533   -0.02041    0.02307   -0.00225
AFIX 137
H18A  2    0.390609    0.932956    0.350805    11.00000   -1.50000
H18B  2    0.360138    1.173553    0.322102    11.00000   -1.50000
H18C  2    0.421584    1.095434    0.316226    11.00000   -1.50000
AFIX   0
C19   1    0.517158    0.381310    0.233516    11.00000    0.02802    0.03166 =
         0.02576   -0.00475    0.01655   -0.00580
C20   1    0.594315    0.528874    0.337198    11.00000    0.03222    0.02309 =
         0.02854   -0.00528    0.01213   -0.00068
AFIX  13
H20   2    0.562608    0.649729    0.329168    11.00000   -1.20000
AFIX   0
C21   1    0.620482    0.457706    0.410350    11.00000    0.03151    0.03540 =
         0.02615   -0.00237    0.01377    0.00042
AFIX  13
H21   2    0.653137    0.341484    0.417461    11.00000   -1.20000
AFIX   0
C22   1    0.653278    0.668562    0.452709    11.00000    0.03656    0.04161 =
         0.02844   -0.00251    0.01331    0.00024
AFIX  23
H22A  2    0.621986    0.785924    0.447563    11.00000   -1.20000
H22B  2    0.673031    0.623877    0.499658    11.00000   -1.20000
AFIX   0
C23   1    0.702951    0.771554    0.433327    11.00000    0.03783    0.03909 =
         0.03111   -0.00252    0.00941   -0.00689
AFIX  23
H23A  2    0.736917    0.660963    0.443679    11.00000   -1.20000
H23B  2    0.720332    0.909470    0.459950    11.00000   -1.20000
AFIX   0
C24   1    0.676486    0.834160    0.359022    11.00000    0.03358    0.03471 =
         0.03157    0.00046    0.01199    0.00028
AFIX  13
H24   2    0.644613    0.954970    0.350158    11.00000   -1.20000
AFIX   0
C25   1    0.644055    0.620910    0.317154    11.00000    0.03325    0.03947 =
         0.02583   -0.00343    0.01139   -0.00129
AFIX  23
H25A  2    0.624808    0.661957    0.269913    11.00000   -1.20000
H25B  2    0.675152    0.501407    0.323631    11.00000   -1.20000
AFIX   0
C26   1    0.571141    0.343835    0.429952    11.00000    0.03609    0.04348 =
         0.03309    0.00155    0.01680   -0.00548
AFIX  13
H26   2    0.554755    0.208260    0.400910    11.00000   -1.20000
AFIX   0
C27   1    0.515301    0.500512    0.417839    11.00000    0.03769    0.07532 =
         0.04704    0.01281    0.02268    0.00535
AFIX 137
H27A  2    0.529415    0.635005    0.445957    11.00000   -1.50000
H27B  2    0.485067    0.418276    0.428339    11.00000   -1.50000
H27C  2    0.496152    0.547216    0.371571    11.00000   -1.50000
AFIX   0
C28   1    0.600444    0.255835    0.502358    11.00000    0.04821    0.04875 =
         0.03506    0.00200    0.02130   -0.00281
AFIX 137
H28A  2    0.637530    0.167403    0.510058    11.00000   -1.50000
H28B  2    0.570666    0.159720    0.509853    11.00000   -1.50000
H28C  2    0.611541    0.385114    0.532638    11.00000   -1.50000
AFIX   0
C29   1    0.726892    0.927659    0.339609    11.00000    0.05079    0.05687 =
         0.03908    0.00410    0.01570   -0.01576
AFIX 137
H29A  2    0.759256    0.813346    0.349087    11.00000   -1.50000
H29B  2    0.744814    1.065447    0.364941    11.00000   -1.50000
H29C  2    0.708499    0.963342    0.292516    11.00000   -1.50000
AFIX   0
HKLF 4

REM  1_a.res in C2
REM R1 =  0.0499 for    3131 Fo > 4sig(Fo)  and  0.0927 for all    4051 data
REM    306 parameters refined using      1 restraints

END

WGHT      0.0741      0.4657

REM Highest difference peak  0.289,  deepest hole -0.256,  1-sigma level  0.065
Q1    1   0.4263  0.2566  0.2236  11.00000  0.05    0.29
Q2    1   0.5679  0.2630  0.2420  11.00000  0.05    0.28
Q3    1   0.3564  0.4071  0.0032  11.00000  0.05    0.28
Q4    1   0.5383  0.3929  0.3085  11.00000  0.05    0.26
Q5    1   0.3204  0.6698  0.0231  11.00000  0.05    0.26
Q6    1   0.3088  1.0767  0.1690  11.00000  0.05    0.25
Q7    1   0.1761  0.9280 -0.0044  11.00000  0.05    0.24
Q8    1   0.4668  0.4074  0.1530  11.00000  0.05    0.24
;
_shelx_res_checksum                76303
_shelx_hkl_file
;
   2   0   0  763.92   66.99
  -2   0   0  640.54   40.20
   2   0   0  658.33   56.59
   4   0   0   55.39    9.70
   4   0   0   65.39    7.30
  -4   0   0   62.89    6.00
  -6   0   0   77.79    8.00
   6   0   0   78.39    9.70
   8   0   0 2867.41  254.17
  -8   0   0 3301.77  180.58
  10   0   0   28.20    4.10
 -10   0   0   25.30    5.60
  10   0   0   16.40    6.50
  10   0   0   24.50    8.70
  12   0   0   85.79   14.20
 -12   0   0  128.59   12.10
  12   0   0  130.79    9.40
 -12   0   0   73.49   16.10
  14   0   0  304.27   39.40
  14   0   0  412.46   26.10
  16   0   0  229.28   18.00
  16   0   0  238.58   16.50
  18   0   0 1217.68   78.69
  18   0   0 1203.28   80.39
 -20   0   0  -27.00   19.80
  20   0   0    1.80    2.70
  20   0   0    1.10    3.90
 -22   0   0   47.30   16.30
  22   0   0   30.40    5.80
  22   0   0   23.80    3.80
  24   0   0    2.70    2.50
  -1  -1   0 4793.32  266.87
  -1  -1   0 5063.39  440.66
   1  -1   0 4729.63  266.07
   1  -1   0 4818.92  441.26
  -1   1   0 3968.80  377.26
   1   1   0 4268.17  377.46
  -3  -1   0 7221.38  398.96
   3  -1   0 7561.04  659.63
  -3   1   0 6403.36  563.74
   3   1   0 6378.86  563.64
   5  -1   0 3156.78  288.67
  -5  -1   0 2950.00  174.58
   5   1   0 2813.22  245.18
  -5   1   0 2990.70  245.98
   7  -1   0 3019.90  275.37
  -7  -1   0 2714.23  166.18
  -7   1   0 2643.74  163.18
   7   1   0 2555.24  272.87
  -7   1   0 2967.10  234.28
   7   1   0 3023.00  233.08
   9  -1   0  388.96   48.40
  -9  -1   0  403.26   29.80
   9  -1   0  401.16   41.50
   9  -1   0  450.25   28.90
   9   1   0  456.75   38.70
   9   1   0  405.06   28.60
  -9   1   0  451.65   40.70
   9   1   0  403.76   27.30
   9   1   0  451.55   46.60
  11  -1   0  225.98   15.20
 -11  -1   0  204.08   18.40
  11  -1   0  136.49   30.70
  11  -1   0  194.98   22.40
  11  -1   0  181.88   29.20
  11   1   0  188.68   14.00
  11   1   0  206.48   21.50
 -11   1   0  234.08   24.50
  11   1   0  202.68   14.70
  13  -1   0   31.20    8.50
 -13  -1   0   34.60    8.60
  13  -1   0    7.30   14.00
 -13  -1   0   36.60   12.60
  13  -1   0   27.70    4.70
  13   1   0   29.60    4.20
 -13   1   0   15.30   13.60
  13   1   0   53.79   11.50
 -13   1   0   45.90   12.90
  15  -1   0  295.67   20.60
  15  -1   0  233.88   32.30
  15  -1   0  286.27   19.00
 -15  -1   0  240.98   24.00
 -15  -1   0  213.68   35.10
 -15   1   0  351.26   34.80
  15   1   0  279.97   18.80
  15   1   0  275.77   20.10
  15   1   0  269.37   18.90
 -17  -1   0  138.09   27.10
  17  -1   0   87.39    7.90
  17  -1   0   93.09    9.60
 -17   1   0   44.80   21.60
  17   1   0   94.09    7.80
  17   1   0   99.79    9.60
 -17   1   0   58.69   22.20
  19  -1   0    2.50    2.80
 -19  -1   0   -2.30   15.90
  19  -1   0    2.50    4.00
 -19   1   0   14.30   22.40
  19   1   0    3.60    4.00
  19   1   0    6.00    2.80
  21  -1   0   28.70    5.90
 -21  -1   0   41.20   16.90
  21  -1   0   26.60    3.90
  21   1   0   30.30    4.10
  21   1   0   29.30    5.60
  23  -1   0   55.89    5.60
  23   1   0   57.79    5.80
  25  -1   0   11.50    2.40
   0  -2   0  643.64   62.79
   0  -2   0  625.54   37.60
   0   2   0  528.55   53.09
  -2  -2   0  329.27   21.80
   2  -2   0  297.47   19.50
   2  -2   0  295.17   35.00
  -2  -2   0  287.57   33.50
  -2   2   0  295.57   29.60
   2   2   0  289.87   29.80
   4  -2   0   86.99   16.50
  -4  -2   0  107.99   12.40
  -4   2   0  129.39   15.40
   4   2   0  121.39   17.20
  -6  -2   0  223.18   18.50
   6  -2   0  167.98   26.20
  -6  -2   0  200.78   22.70
   6  -2   0  185.88   19.70
   6   2   0  207.88   13.80
  -6   2   0  200.38   22.60
   6   2   0  195.68   23.20
   8  -2   0 1974.00  177.48
   8  -2   0 1743.33  191.38
  -8  -2   0 2030.70  117.39
  -8  -2   0 1919.21  195.08
   8  -2   0 2109.29  124.49
   8  -2   0 1867.51  195.98
  -8   2   0 1877.61  163.38
   8   2   0 1929.51  118.99
   8   2   0 1757.72  161.28
  10  -2   0  568.44   37.90
 -10  -2   0  581.04   40.60
  10  -2   0  485.15   63.69
 -10  -2   0  550.14   59.79
  10   2   0  612.44   51.79
  10   2   0  548.65   36.10
  10   2   0  524.95   37.30
 -10   2   0  610.04   54.99
  12  -2   0    9.60   15.90
  12  -2   0   10.30    3.90
 -12  -2   0   17.50    8.10
 -12  -2   0    4.40    6.80
  12  -2   0   16.00    6.50
  12   2   0   11.80    3.60
  12   2   0    9.70    3.20
 -12   2   0  -11.80   12.80
 -12   2   0   12.40    9.30
  14  -2   0   -2.50   18.30
 -14   2   0    4.40   12.40
  16  -2   0   62.19   14.50
  16  -2   0   38.30    6.60
  16  -2   0   67.69    6.40
 -16  -2   0   60.89   13.50
 -16   2   0   29.90   16.90
  16   2   0   54.99    7.30
  16   2   0   57.29    7.10
 -16   2   0   14.20   22.10
  18  -2   0   56.89    6.20
  18  -2   0   56.99    7.60
 -18  -2   0   70.29   14.80
  18   2   0   62.09    6.10
 -18   2   0   25.00   23.00
  18   2   0   36.90    6.00
 -18   2   0    8.40   20.30
 -18   2   0   36.90   17.70
 -20  -2   0  165.98   23.00
  20  -2   0  152.08   11.70
  20  -2   0  144.59   13.30
  22  -2   0   29.70    4.00
  24  -2   0   44.50    4.20
  -1  -3   0   36.60    6.40
   1  -3   0   29.30    6.40
  -1  -3   0   35.40    6.20
   1  -3   0   30.10   10.40
   1  -3   0   25.00    5.50
   1  -3   0   41.70    6.20
  -1  -3   0   34.20    7.00
   1   3   0   44.90    7.00
  -1   3   0   26.00    6.00
   1   3   0   45.40   13.70
  -1   3   0   32.90   11.10
   3  -3   0   -1.70    6.00
  -3  -3   0   -1.90    3.00
   3  -3   0   -0.50    2.70
   3  -3   0   -6.20    4.80
  -3  -3   0    1.10    2.70
  -3  -3   0   -1.20    5.20
   3   3   0   -7.80    3.60
   3   3   0   -0.30    2.00
   3   3   0    2.40    9.60
  -3   3   0   -6.50    3.70
  -3   3   0   11.30    8.90
   5  -3   0  405.36   38.30
   5  -3   0  310.87   46.10
  -5  -3   0  411.26   30.10
  -5  -3   0  407.26   41.70
  -5  -3   0  357.16   38.20
   5   3   0  374.76   36.10
   5   3   0  348.57   41.20
  -5   3   0  444.26   36.60
  -5   3   0  391.96   41.00
   5   3   0  406.66   25.70
  -7  -3   0   60.69   11.70
   7  -3   0  105.69   17.10
   7  -3   0   55.29   10.40
  -7  -3   0   63.39   10.30
  -7  -3   0   70.79   10.60
  -7   3   0   58.99   14.80
   7   3   0   68.99    9.00
   7   3   0   72.09    6.80
   7   3   0   75.19   16.70
  -7   3   0   55.09   11.00
  -7   3   0   73.19   10.20
  -9  -3   0  108.89   16.00
   9  -3   0  108.89   14.30
  -9  -3   0  110.19   14.80
  -9  -3   0   86.69   13.30
   9   3   0  104.19   19.50
   9   3   0  106.69    9.30
  -9   3   0  101.39   20.90
  11  -3   0   80.29   14.00
  11  -3   0   81.09   23.00
 -11  -3   0   64.99   12.60
  11  -3   0   92.29   10.90
 -11  -3   0   68.19   13.60
 -11   3   0   67.99   18.60
  11   3   0   65.79    7.70
  11   3   0   10.40  101.09
 -13  -3   0  878.61   88.39
  13   3   0  510.05  193.28
  13   3   0  808.62   53.89
  15  -3   0  288.47   33.80
  15  -3   0  217.88   16.80
 -15  -3   0  263.47   29.70
  15  -3   0  203.18   18.20
  15   3   0  243.48   18.10
  17  -3   0   63.39    6.40
  17  -3   0   55.49    7.70
 -17  -3   0   76.79   14.60
  17  -3   0   82.79   19.90
  17   3   0   58.99    7.70
 -17   3   0   32.00   22.80
 -17   3   0   48.00   20.40
  19  -3   0   26.70    6.60
  19  -3   0   20.70    3.50
  19   3   0   20.90    4.60
 -19   3   0   19.60   17.70
 -21   3   0   16.50   14.20
   0  -4   0  368.76   37.40
   0   4   0  327.17   42.80
   0   4   0  384.26   35.70
   2  -4   0  149.59   17.60
  -2  -4   0  147.89   17.20
  -2  -4   0  136.09   17.20
   2   4   0  -34.00  104.39
  -2   4   0  154.68   16.90
   2   4   0  114.79   24.90
  -2   4   0   93.69   23.10
   2   4   0  136.79   16.50
  -4   4   0  126.99   15.90
   4   4   0   18.40  130.69
  -6  -4   0  168.98   20.70
  -6  -4   0  156.58   19.40
   6  -4   0  189.08   20.40
  -6  -4   0  149.29   19.40
   6  -4   0  130.59   25.80
   6   4   0  186.28   13.20
   6   4   0  165.98   18.80
  -6   4   0  183.48   28.10
   6   4   0  124.59   27.40
  -6   4   0  188.78   19.70
   6   4   0   84.69  133.19
  -6   4   0  177.18   23.50
  -8  -4   0  155.18   20.20
  -8  -4   0  147.59   18.60
   8  -4   0  186.18   20.30
   8  -4   0  114.59   28.90
   8   4   0  151.38   20.10
   8   4   0  184.88   13.40
   8   4   0   15.80  146.09
  -8   4   0  159.68   19.30
 -10  -4   0  226.78   28.30
  10  -4   0  273.57   43.10
  10  -4   0  279.87   28.10
  10   4   0   73.69  141.09
  10   4   0  212.78   17.80
  12  -4   0   37.80   11.30
 -12  -4   0   34.00    8.90
 -12   4   0    6.20   18.40
  12   4   0   26.90    5.60
  12   4   0   10.50  137.39
  14  -4   0   93.69   18.00
 -14  -4   0   58.59   12.00
 -14   4   0   25.60   20.50
 -14   4   0   18.60   18.90
  14   4   0   52.39    7.50
  14   4   0  -20.30  118.69
 -16   4   0   20.20   19.60
 -18   4   0   34.30   16.30
 -20   4   0   -3.20    9.60
  -1  -5   0  424.56   39.20
   1  -5   0  432.16   39.40
   1   5   0  320.07   36.90
   1   5   0  -51.79  143.69
  -1   5   0  314.87   36.70
  -3  -5   0  370.36   35.40
   3   5   0  108.49  172.48
  -3   5   0  296.67   34.10
   3   5   0  324.27   34.00
  -5  -5   0   66.29   11.80
   5  -5   0   43.40    9.40
   5   5   0   61.99   11.80
  -5   5   0   55.09   12.50
   5   5   0  -22.80  149.39
  -7  -5   0  157.78   18.90
   7   5   0  143.99   18.30
   7   5   0   55.19  141.69
  -7   5   0  154.38   19.80
   9  -5   0   36.50   10.50
  -9   5   0   17.90   15.50
   9   5   0   12.10    4.40
   9   5   0   26.00  143.89
  11   5   0   20.30  133.19
 -11   5   0   72.29   18.20
 -13   5   0   -9.60   24.90
  13   5   0   36.40    6.80
 -13   5   0   20.30   18.70
  13   5   0   49.20  120.29
 -15   5   0  104.89   22.10
  15   5   0   39.00   93.59
 -17   5   0   -1.40   10.70
   2   6   0    5.50  124.79
   4   6   0  -72.59  113.59
  -4   6   0   14.50    8.50
   4   6   0   21.20    8.20
   6   6   0    4.80  119.69
   8   6   0   44.10  119.79
  10   6   0   -4.40   99.39
  12   6   0   35.20   82.79
  26   0  -1    2.50    2.70
  24   0  -1   93.09    7.60
  22   0  -1  364.26   24.30
 -22   0   1  315.47   49.20
  22   0  -1  367.16   26.00
  20   0  -1   12.10    3.40
  20   0  -1    7.10    4.20
 -20   0   1   14.90   22.60
 -18   0   1  256.17   46.60
  18   0  -1  332.87   21.50
  18   0  -1  303.67   22.90
  16   0  -1  133.09   10.30
  16   0  -1  141.39   11.90
 -16   0   1  201.28   28.60
  16   0  -1  111.39   20.70
  12   0  -1   37.30    4.60
  12   0  -1   37.30    8.90
 -12   0   1    9.10    9.40
  12   0  -1   26.60    8.40
 -12   0   1   29.90    6.40
  10   0  -1  472.75   49.60
  10   0  -1  593.44   37.50
  10   0  -1  627.34   61.59
 -10   0   1  558.54   36.20
  -8   0   1  734.03   46.20
   8   0  -1  669.53   64.19
   8   0  -1  863.51   77.79
  -6   0   1 3955.30  224.48
   6   0  -1 3872.61  317.17
   6   0  -1 3763.72  371.96
   4   0  -1 4570.24  383.86
   4   0  -1 5122.09  449.06
  -4   0   1 4390.46  271.27
   2   0  -1   84.09    7.80
   2   0  -1   88.39    9.30
  -2   0   1   81.09    5.80
   0   0  -1 1409.86   81.49
  -2   0  -1  243.18   13.60
   2   0   1  187.78   17.90
   4   0   1  808.12   79.99
  -4   0  -1  817.92   47.60
   4   0   1  759.02   66.09
  -6   0  -1 2230.08  120.19
   6   0   1 1860.81  168.48
   8   0   1   26.50    9.60
  -8   0  -1   39.60    6.10
   8   0   1   42.50    7.70
  10   0   1  196.58   28.90
  10   0   1  229.98   15.90
 -10   0  -1  211.48   17.10
 -12   0  -1   10.70    9.40
 -12   0  -1   -1.90    9.40
 -12   0  -1   19.30    7.80
 -12   0  -1    2.10    4.50
  12   0   1   10.60    3.40
  16   0   1    1.00    2.40
 -16   0  -1   12.80   16.90
  16   0   1    7.70    3.90
 -18   0  -1  166.58   39.40
  18   0   1  256.27   18.80
  18   0   1  244.08   16.80
 -20   0  -1  -15.80   18.70
  20   0   1   17.30    4.90
  22   0   1   -0.30    3.50
  22   0   1    1.20    2.50
  24   0   1    0.70    2.30
  25  -1  -1    2.60    2.10
  25   1  -1    0.20    2.40
  23  -1  -1    4.10    2.60
  23   1  -1    4.70    2.60
 -21  -1   1  161.58   30.40
  21  -1  -1  145.49   13.40
  21  -1  -1  160.78   11.80
  21   1  -1  154.68   11.70
  21   1  -1  147.99   13.30
  19  -1  -1   90.99   10.10
 -19  -1   1   98.89   22.50
  19  -1  -1   93.49    8.20
  19   1  -1  110.19   10.30
  19   1  -1   88.09    8.10
 -19   1   1   72.59   26.30
  17  -1  -1  164.38   13.70
  17  -1  -1  141.49   23.60
  17  -1  -1  159.48   12.00
 -17  -1   1  181.08   31.20
 -17   1   1  105.79   27.00
  17   1  -1  171.68   12.10
  17   1  -1  173.88   13.70
  15  -1  -1   74.49    6.50
 -15  -1   1   58.09   11.60
  15  -1  -1   75.99    8.20
  15  -1  -1   58.09   12.80
  15  -1  -1   27.00   20.40
 -15  -1   1   57.19   15.60
  15   1  -1   74.59    7.80
  15   1  -1   67.59    7.00
 -15   1   1  106.59   19.80
  15   1  -1   79.49   17.00
  15   1  -1   73.79    6.40
  13  -1  -1  132.69   10.90
 -13  -1   1  130.59   15.30
 -13  -1   1  118.69   23.60
  13  -1  -1  120.39   18.50
  13   1  -1  136.39   10.60
  13   1  -1  124.69   16.50
  13   1  -1  100.09   17.30
  13   1  -1  128.79    9.80
 -13   1   1  141.29   19.20
  11  -1  -1  246.98   29.30
  11  -1  -1  315.17   20.40
 -11  -1   1  270.87   22.90
  11  -1  -1  268.27   37.10
 -11   1   1  329.47   31.40
  11   1  -1  303.77   20.10
  11   1  -1  310.77   28.70
  11   1  -1  216.68   31.80
  11   1  -1  295.07   19.10
   9  -1  -1   39.70   10.90
   9  -1  -1   45.50   20.70
  -9  -1   1   46.30    8.20
   9  -1  -1   54.29    5.80
  -9   1   1   52.89   10.70
   9   1  -1   55.29    9.20
  -9   1   1   52.29    9.50
  -7  -1   1  313.97   23.90
   7  -1  -1  327.57   38.30
  -7   1   1  341.87   32.10
   7   1  -1  365.26   36.00
   7   1  -1  318.57   31.20
   5  -1  -1 3841.72  357.86
  -5  -1   1 3800.52  216.68
   5   1  -1 3553.84  304.97
  -5   1   1 3635.04  305.27
  -3  -1   1  495.15   29.30
   3  -1  -1  480.15   48.00
  -3   1   1  426.16   39.80
   3   1  -1  436.96   40.30
  -1  -1   1 1514.95  143.59
   1  -1  -1 1503.75   86.79
   1  -1  -1 1625.54  145.19
  -1  -1   1 1537.45   87.49
   1   1  -1 1457.15  123.79
  -1   1   1 1305.77  123.19
   1  -1   1  319.87   20.60
   1  -1   1  349.96   35.10
  -1  -1  -1  388.06   35.60
  -1  -1  -1  359.56   21.70
   1   1   1  323.87   29.80
  -1   1  -1  289.77   29.60
  -3  -1  -1 3004.30  172.68
   3  -1   1 3197.78  285.37
   3   1   1 2673.83  242.88
  -3   1  -1 3122.99  170.78
  -3   1  -1 2777.22  243.38
  -5  -1  -1  396.26   27.80
   5  -1   1  407.76   45.20
   5   1   1  408.96   37.00
  -5   1  -1  430.06   25.10
  -5   1  -1  437.96   37.90
   7  -1   1   15.50    7.40
  -7  -1  -1   13.40    5.30
   7   1   1    3.70   10.40
   7   1   1   34.10    6.70
  -7   1  -1   25.20    3.50
  -7   1  -1   31.90    8.10
   9  -1   1  235.98   16.50
   9  -1   1  233.68   23.40
  -9  -1  -1  211.78   18.70
   9  -1   1  182.78   29.60
   9   1   1  214.88   16.00
   9   1   1  258.27   29.70
  -9   1  -1  247.48   25.00
   9   1   1  223.18   15.60
   9   1   1  226.78   22.40
 -11  -1  -1   97.49   16.80
  11  -1   1   95.89    8.40
  11  -1   1   69.79   13.70
 -11  -1  -1   76.09   11.60
  11   1   1   85.69   12.00
  11   1   1   79.89    7.40
 -11   1  -1   96.69   15.00
  11   1   1   82.19    7.60
  13  -1   1  132.79   20.90
  13  -1   1  161.68   12.90
 -13  -1  -1  167.08   17.30
 -13  -1  -1  132.19   23.20
  13   1   1  155.68   12.50
  13   1   1  159.48   11.80
 -13   1  -1  184.48   22.40
  15  -1   1  154.68   12.60
  15  -1   1  148.49   11.00
 -15  -1  -1  147.19   21.30
 -15  -1  -1  125.29   24.20
  15   1   1  152.38   12.20
 -15   1  -1   84.39   23.80
  15   1   1  148.29   10.60
  15   1   1  130.09   11.10
  17  -1   1    2.10    2.80
 -17  -1  -1   18.10   14.60
  17  -1   1    3.80    4.10
 -17   1  -1  -16.40   14.30
 -17   1  -1   -9.10   18.20
  17   1   1    5.20    2.70
  17   1   1    7.70    3.90
 -17   1  -1   -3.20   18.30
 -19  -1  -1   -4.30   14.30
  19  -1   1    5.50    3.10
  19  -1   1    6.90    4.40
  19   1   1    8.60    2.90
 -19   1  -1  -27.60   20.00
  19   1   1    5.40    3.90
  21  -1   1  105.99   11.10
 -21  -1  -1  165.78   21.90
  21  -1   1  116.69    9.40
  21   1   1  107.59   10.70
  21   1   1  122.19    9.40
 -21   1  -1   73.39   29.90
  23  -1   1   11.60    2.70
  23   1   1    8.50    3.00
  24  -2  -1   36.50    4.10
  22  -2  -1   11.90    3.10
 -22   2   1  -21.20   13.20
  22   2  -1    7.80    3.50
 -20  -2   1  225.18   29.20
  20  -2  -1  202.28   14.60
  20  -2  -1  173.68   15.90
  20   2  -1  204.48   14.40
  18  -2  -1  175.18   12.20
 -18  -2   1  199.38   28.20
  18  -2  -1  169.98   26.10
  18  -2  -1  147.59   13.70
  18   2  -1  132.39   12.50
  18   2  -1  147.19   11.70
  18   2  -1  155.98   13.50
  16  -2  -1   85.19    7.30
  16  -2  -1   80.79   15.70
  16  -2  -1   76.69    9.00
 -16  -2   1  107.29   20.40
  16  -2  -1   18.30   24.40
  16   2  -1   89.39    8.80
  16   2  -1   69.29    6.70
 -16   2   1   25.40   21.50
  16   2  -1   71.89    8.00
 -14  -2   1   84.29   16.70
  14  -2  -1   63.29    7.90
  14  -2  -1   38.80   21.50
  14  -2  -1   70.59    6.40
  14  -2  -1   65.29   11.70
 -14  -2   1   65.49   13.30
  14   2  -1   65.89    7.10
  14   2  -1   69.59    7.30
  14   2  -1   51.59    6.60
 -14   2   1   70.39   17.00
 -14   2   1   27.50   17.70
 -12  -2   1   85.29   13.90
  12  -2  -1  115.79   15.70
  12  -2  -1  106.09    9.30
  12  -2  -1   82.59   21.30
 -12  -2   1  101.49   17.50
 -12   2   1  115.79   18.90
  12   2  -1   96.39    9.00
  12   2  -1   89.89    8.70
  12   2  -1  123.59   15.40
  10  -2  -1  293.97   45.60
 -10  -2   1  364.46   42.50
  10  -2  -1  351.06   45.90
  10  -2  -1  423.16   26.70
 -10  -2   1  403.86   30.60
  10   2  -1  376.36   25.30
 -10   2   1  442.66   40.90
 -10   2   1  374.56   39.70
  10   2  -1  384.56   37.50
  -8  -2   1  470.25   52.99
  -8  -2   1  515.65   35.90
   8  -2  -1  507.55   47.50
   8  -2  -1  530.65   33.60
   8  -2  -1  437.26   56.19
   8  -2  -1  547.45   54.59
   8   2  -1  487.15   32.00
  -8   2   1  476.35   47.40
   8   2  -1  482.85   47.00
   6  -2  -1 1487.55  148.49
   6  -2  -1 1439.16  138.49
  -6  -2   1 1594.64   90.79
   6  -2  -1 1406.36  136.59
   6   2  -1 1480.95  126.09
   6   2  -1 1417.06   91.49
  -6   2   1 1529.65  126.39
  -4  -2   1  129.39   13.00
   4  -2  -1   84.79   17.30
   4   2  -1  133.49   18.20
  -4   2   1  134.49   16.10
   2  -2  -1  777.82   76.49
  -2  -2   1  711.33   73.59
   2  -2  -1  763.92   44.10
  -2  -2   1  739.43   45.90
   2   2  -1  700.13   64.59
  -2   2   1  688.93   64.09
   0  -2   1  344.97   36.60
   0  -2  -1  352.46   22.30
   0  -2  -1  326.37   37.10
   0  -2   1  323.87   21.80
   0   2  -1  308.17   31.50
   0   2   1  293.47   31.00
  -2  -2  -1  202.98   15.20
   2  -2   1  153.78   21.90
  -2  -2  -1  172.68   22.40
   2  -2   1  159.28   12.30
  -2   2  -1  170.88   19.90
   2   2   1  175.28   19.80
   4  -2   1  503.85   55.19
  -4  -2  -1  549.74   34.70
  -4   2  -1  497.55   47.10
   4   2   1  483.95   46.80
  -6  -2  -1   48.60    9.10
  -6  -2  -1   48.30    8.60
   6  -2   1   39.30   10.90
   6  -2   1   45.30    7.00
   6   2   1   50.89    5.30
  -6   2  -1   40.70   10.20
   6   2   1   43.00   10.90
  -6   2  -1   51.09    9.30
   8  -2   1  257.97   39.70
   8  -2   1  290.67   40.40
   8  -2   1  366.46   23.30
  -8  -2  -1  330.27   26.40
   8  -2   1  365.76   32.10
  -8  -2  -1  321.87   36.10
  -8   2  -1  329.37   34.60
   8   2   1  320.47   21.70
   8   2   1  305.77   32.30
 -10  -2  -1   87.99   13.90
  10  -2   1  137.69   15.20
  10  -2   1  106.09   21.70
  10  -2   1  125.79   10.60
 -10  -2  -1  110.09   17.60
  10   2   1  103.89    9.60
  10   2   1  137.79   19.60
 -10   2  -1  129.09   19.20
 -12  -2  -1  126.59   18.90
  12  -2   1  107.99   10.70
  12  -2   1  150.08   17.60
 -12  -2  -1   81.99   14.50
  12   2   1  113.39    9.80
 -12   2  -1   99.59   19.60
 -16  -2  -1  169.48   22.90
  16  -2   1  133.89   10.60
  16  -2   1  142.89   28.10
  16  -2   1  126.29   12.30
  16   2   1  118.09   11.20
  18  -2   1  305.07   20.60
  18  -2   1  252.07   22.00
 -18  -2  -1  339.87   37.50
  18   2   1  279.77   20.80
  20  -2   1   43.90    5.40
 -20  -2  -1   52.19   12.30
  20  -2   1   37.00    6.40
 -20   2  -1   19.00   15.60
  22  -2   1    8.70    2.80
  21  -3  -1  127.89   10.90
  19  -3  -1   43.40   22.50
  19  -3  -1   45.20    5.20
 -19   3   1   42.80   18.70
  19   3  -1   47.00    6.30
  17  -3  -1  172.98   33.60
 -17  -3   1  182.88   23.90
  17   3  -1  175.58   14.40
  15  -3  -1  150.68   27.60
 -15  -3   1  145.49   21.00
  15   3  -1  138.39   12.60
 -13  -3   1  354.16   41.20
  13   3  -1  378.06   25.50
  13   3  -1  136.09  138.19
 -11  -3   1   20.00    6.60
  11  -3  -1   22.70    6.70
  11  -3  -1   33.30   22.60
  11  -3  -1   15.70   15.70
 -11  -3   1    9.00    8.80
 -11  -3   1   16.10    6.00
 -11   3   1   12.00   10.40
  11   3  -1  -60.39   93.59
  11   3  -1   34.10   11.40
  11   3  -1   15.70    4.30
 -11   3   1   -7.00   11.40
  -9  -3   1  386.76   42.20
   9  -3  -1  416.76   38.70
   9  -3  -1  383.06   47.10
   9  -3  -1  392.06   45.70
  -9  -3   1  363.96   31.40
  -9  -3   1  330.57   38.30
  -9   3   1  406.16   43.30
   9   3  -1  355.26   41.00
  -9   3   1  434.26   41.90
   9   3  -1  393.06   26.10
   7  -3  -1  681.03   62.39
  -7  -3   1  652.63   45.80
  -7  -3   1  650.23   68.29
   7  -3  -1  582.04   72.29
   7  -3  -1  738.63   69.49
  -7  -3   1  579.94   62.39
   7   3  -1  641.04   58.79
  -7   3   1  694.43   59.19
  -7   3   1  614.54   62.59
   7   3  -1  661.53   63.29
   7   3  -1  656.93   42.00
   5  -3  -1 1489.55  141.39
   5  -3  -1 1484.65  139.59
  -5  -3   1 1611.24   93.29
   5  -3  -1 1433.76  153.38
  -5  -3   1 1390.86  139.69
  -5  -3   1 1472.15  152.68
   5   3  -1 1566.64   93.39
  -5   3   1 1615.44  132.29
   5   3  -1 1411.06  130.69
   5   3  -1 1444.06  131.89
  -5   3   1 1562.24  131.19
   3  -3  -1   97.29   19.90
   3  -3  -1   96.79   12.50
   3  -3  -1  121.39   13.10
  -3  -3   1  101.19   12.50
  -3  -3   1   97.89   12.70
   3  -3  -1   92.89   13.80
  -3  -3   1  116.29   12.90
   3   3  -1  111.09   20.20
  -3   3   1   94.59   11.90
   3   3  -1  110.09    8.20
   3   3  -1   88.59   12.00
  -3   3   1  107.19   17.80
  -1  -3   1   40.80    6.10
   1  -3  -1   32.90    6.20
  -1  -3   1   35.30    6.50
   1  -3  -1   38.40    6.50
   1  -3  -1   37.00    6.80
  -1  -3   1   33.60    7.00
   1  -3  -1   35.60   12.00
  -1   3   1   36.50    6.70
   1   3  -1   28.10    6.40
   1   3  -1   38.80   13.30
  -1   3   1   44.40   12.60
  -1  -3  -1  118.79   12.50
  -1  -3  -1  108.59   13.20
   1  -3   1  141.49   18.80
   1  -3   1  100.99   12.70
  -1  -3  -1  102.89   12.70
  -1   3  -1   99.59   12.40
   1   3   1  115.49   19.40
  -1   3  -1  102.69   18.80
   1   3   1  103.49   12.20
   3  -3   1   17.80    4.50
  -3  -3  -1   19.50    4.70
  -3  -3  -1   15.60    4.40
   3  -3   1   15.20    8.20
  -3  -3  -1   14.10    6.50
   3   3   1   22.20    3.40
  -3   3  -1   21.10    5.90
   3   3   1   15.70   11.30
  -3   3  -1   15.10    9.90
   3   3   1   15.60    5.00
   5  -3   1  397.06   47.60
   5  -3   1  400.26   39.10
  -5  -3  -1  401.46   42.60
  -5  -3  -1  429.26   30.80
  -5  -3  -1  342.87   38.70
  -5   3  -1  387.26   41.70
   5   3   1  409.36   26.20
   5   3   1  389.26   36.80
  -5   3  -1  450.95   37.50
   5   3   1  380.16   41.80
  -7  -3  -1  350.16   40.30
  -7  -3  -1  410.76   32.40
   7  -3   1  441.36   40.90
   7  -3   1  421.46   48.80
  -7  -3  -1  438.36   44.90
   7   3   1  385.06   42.80
  -7   3  -1  402.86   43.60
   7   3   1  397.76   38.10
   7   3   1  435.16   27.60
  -7   3  -1  439.76   44.70
  -7   3  -1  436.46   38.90
   9  -3   1   79.19   27.40
   9  -3   1  105.69   10.30
   9  -3   1  134.69   15.50
  -9  -3  -1  106.79   15.60
  -9  -3  -1  110.99   16.80
  -9   3  -1  118.49   22.80
   9   3   1  113.59   10.00
 -11  -3  -1  305.97   32.50
  11  -3   1  251.87   20.50
 -11  -3  -1  257.17   26.60
  11  -3   1  242.58   40.00
  11   3   1  320.77  161.38
 -11   3  -1  294.37   36.30
  11   3   1  281.67   19.90
  13  -3   1  144.09   11.30
 -13  -3  -1  137.29   19.80
  13  -3   1  200.88   23.30
  13  -3   1  136.29   12.80
  13   3   1  146.59   12.40
 -13   3  -1   78.99   26.40
  13   3   1   86.39  124.19
  15  -3   1   64.39    8.90
  15  -3   1   88.39   16.90
 -15  -3  -1   88.89   15.70
  15  -3   1   75.89    7.30
 -15   3  -1   67.39   21.50
 -15   3  -1   36.70   24.10
  15   3   1   81.29    9.00
  17  -3   1   13.00    4.60
 -17  -3  -1   12.80    8.40
  17  -3   1    8.30    3.10
 -17   3  -1   27.00   19.40
 -17   3  -1    7.00   20.90
  17   3   1   10.00    4.10
  19  -3   1   19.40    6.60
  19  -3   1   11.50    3.10
 -19   3  -1   32.90   17.00
  19   3   1   10.70    3.70
  21  -3   1    5.70    2.40
 -21   3  -1    3.30   12.30
 -20   4   1    7.50   11.60
 -18   4   1   53.89   18.50
  16  -4  -1   23.70   17.50
  14  -4  -1  190.28   29.10
 -14  -4   1  154.68   18.80
  14   4  -1  115.69   12.20
  14   4  -1   10.30  129.69
 -12  -4   1   84.69   15.30
  12  -4  -1  139.69   21.20
  12   4  -1   94.59   10.00
  12   4  -1   13.80  130.59
 -10  -4   1  324.37   38.80
 -10  -4   1  301.87   35.30
  10  -4  -1  416.46   37.10
  10  -4  -1  378.26   52.99
  10   4  -1   53.89  159.28
  10   4  -1  346.97   24.40
  -8  -4   1  325.07   35.40
   8  -4  -1  240.08   43.80
  -8  -4   1  290.27   32.50
   8  -4  -1  368.16   33.70
   8   4  -1  264.57   30.50
   8   4  -1   52.29  148.19
   8   4  -1  358.46   22.50
  -8   4   1  288.57   37.00
  -8   4   1  358.16   31.90
  -6  -4   1   76.99   12.10
   6  -4  -1   72.79   18.70
   6  -4  -1   73.59   12.70
  -6  -4   1   56.09   12.60
  -6  -4   1   83.19   11.80
   6   4  -1  -23.30  112.19
  -6   4   1   70.69   12.60
   6   4  -1   64.89   11.40
   6   4  -1   92.29    8.00
   6   4  -1   65.49   20.00
  -6   4   1  113.89   16.00
  -6   4   1   60.29   18.10
   4  -4  -1  103.49   14.60
  -4  -4   1  104.49   14.20
  -4   4   1  122.69   14.60
   4   4  -1  104.09   14.20
  -4   4   1  107.69   23.50
   4   4  -1   11.80  104.69
   4   4  -1   67.39   20.40
   2  -4  -1  113.89   14.30
  -2  -4   1  112.39   14.30
  -2   4   1  108.29   13.60
  -2   4   1   93.89   22.50
   2   4  -1  -77.09   90.79
   2   4  -1   55.99   19.10
   2   4  -1   84.69   13.60
   0  -4  -1  121.29   14.60
   0  -4   1  106.39   15.00
   0  -4  -1  111.59   14.80
   0   4  -1  120.99   14.80
   0   4   1  105.99   14.10
   0   4  -1   88.19   22.80
   0   4   1   81.29   22.70
  -2  -4  -1  431.86   48.70
  -2  -4  -1  446.26   45.10
   2  -4   1  478.05   45.50
   2   4   1   96.19  136.39
  -2   4  -1  497.85   43.80
  -2   4  -1  416.66   50.19
   2   4   1  469.25   43.20
  -4  -4  -1  174.78   20.60
   4  -4   1  180.18   20.10
  -4  -4  -1  165.68   19.50
  -4   4  -1  127.59   27.10
  -4   4  -1  212.28   21.70
   4   4   1  177.58   13.10
   4   4   1  144.99   18.70
  -4   4  -1  170.78   20.20
   4   4   1   15.90  115.49
   4   4   1  137.19   27.90
   6   4   1   61.99  123.49
   8  -4   1   -8.50   18.80
   8  -4   1    8.20    6.00
  -8  -4  -1   14.90    5.80
  -8   4  -1   23.00    8.80
  -8   4  -1  -12.10   11.50
   8   4   1    5.20  123.49
   8   4   1   17.40    4.70
 -10  -4  -1  150.78   21.40
  10  -4   1  202.38   22.50
  10   4   1  -45.40  129.39
  10   4   1  161.08   13.90
  12  -4   1    8.00    9.90
 -12  -4  -1    1.90    5.50
 -12   4  -1    4.20   18.50
  12   4   1  -56.19  127.59
  12   4   1    1.90    4.00
 -12   4  -1    8.10   15.70
 -14  -4  -1   22.20    8.20
  14  -4   1   59.19   16.30
  14   4   1    7.80  116.79
 -14   4  -1   39.20   19.40
 -14   4  -1   25.00   20.50
  14   4   1   30.30    5.90
  16  -4   1   66.99   20.70
  16   4   1   33.60    5.60
 -16   4  -1   40.40   19.50
 -18   4  -1   50.79   16.60
 -20   4  -1    3.60    8.70
 -17   5   1   34.50   13.10
 -15   5   1   47.00   20.00
  15   5  -1   14.60   90.09
  13   5  -1   46.20    6.00
 -13   5   1   11.90   17.50
  13   5  -1  -19.40  107.49
 -13   5   1   44.40   18.60
  11   5  -1   35.80  136.99
  11   5  -1   90.89    9.00
  -9  -5   1   10.80    5.40
   9  -5  -1   21.00    9.20
   9   5  -1   13.40    4.30
  -9   5   1   31.40   14.40
   9   5  -1  -70.39  136.69
  -7  -5   1  202.58   22.10
   7   5  -1  -35.70  154.08
  -7   5   1  193.28   22.30
   7   5  -1  162.98   21.30
  -5  -5   1  149.69   19.10
   5  -5  -1  180.58   20.40
  -5   5   1  134.09   19.80
   5   5  -1  124.89   19.00
   5   5  -1    6.10  148.39
   3  -5  -1  183.18   21.00
  -3  -5   1  162.18   20.10
   3   5  -1  153.78   20.50
   3   5  -1  -22.90  116.89
  -3   5   1  124.99   19.90
  -1  -5   1   82.29   14.30
   1   5  -1  -20.80  126.29
   1   5  -1   67.39   13.40
  -1   5   1   63.99   12.90
   1  -5   1  402.36   37.30
  -1  -5  -1  386.16   36.70
  -1   5  -1  301.97   35.20
   1   5   1  296.27   34.70
   1   5   1   89.09  166.58
   3  -5   1   76.59   14.50
  -3  -5  -1   72.59   13.00
   3   5   1  -28.90  147.89
   3   5   1   69.69   13.00
  -3   5  -1   60.29   13.20
   5   5   1   22.10  141.49
  -5   5  -1   69.59   13.50
   5   5   1   73.79   13.10
   7   5   1  128.49   15.60
   7   5   1   -0.80  152.58
  -7   5  -1  104.19   17.30
   9  -5   1  174.68   24.50
   9   5   1  -33.10  139.69
  11   5   1  -16.40  123.19
 -11   5  -1  -18.10   16.50
  11   5   1    4.20    3.60
 -11   5  -1   -3.80   15.40
 -13   5  -1   17.60   18.60
  13   5   1   13.50  110.99
  15   5   1   -4.30   83.99
 -15   5  -1   11.70   16.60
 -17   5  -1    8.50   13.00
  12   6  -1   40.80   85.89
  10   6  -1   75.49  113.39
   8   6  -1   33.00  128.29
   6   6  -1   47.00  136.39
   4   6  -1  -81.39  120.59
  -4   6   1   23.80    8.70
   4   6  -1   19.90    8.70
  -2   6   1  204.78   23.60
   2   6  -1  203.48   23.40
   2   6  -1   87.89  137.29
   2   6   1  -46.60  119.19
   2   6   1   56.99   11.20
   4   6   1  -36.60  118.69
  -4   6  -1   14.30    9.80
   4   6   1   36.40   11.00
   6   6   1   67.49  132.69
   8   6   1   53.49  112.89
  10   6   1   30.00  100.49
  12   6   1  -16.20   73.39
  26   0  -2   35.70    3.90
  24   0  -2    0.60    2.40
  22   0  -2   20.10    4.90
 -22   0   2  -25.90   21.30
  20   0  -2   15.60    3.50
 -20   0   2   44.30   24.20
  20   0  -2   19.10    4.90
  18   0  -2  134.69   10.20
 -18   0   2  120.39   27.30
  18   0  -2  121.79   23.40
  18   0  -2  126.89   11.80
  16   0  -2  267.67   18.70
  16   0  -2  286.87   20.30
 -16   0   2  340.97   34.00
  16   0  -2  194.18   35.40
  14   0  -2  131.59   10.50
  14   0  -2   98.89   20.20
  12   0  -2   79.19   15.70
  12   0  -2   60.29   15.50
  12   0  -2   69.99   12.20
 -12   0   2   74.29    9.50
  12   0  -2   52.59   11.00
  12   0  -2   89.89    7.10
  10   0  -2   63.99   10.40
  10   0  -2   74.89    6.30
  10   0  -2   53.29   14.10
  10   0  -2   74.69   13.60
 -10   0   2   66.99    8.50
   8   0  -2  222.38   24.40
   8   0  -2  176.48   18.90
  -8   0   2  178.78   14.30
  -6   0   2  139.69   10.90
   6   0  -2  137.19   14.40
   4   0  -2  172.38   19.00
   4   0  -2  186.08   16.10
  -4   0   2  162.78   11.80
   2   0  -2 8829.72  897.01
   2   0  -2 9999.00  768.02
   2   0  -2 9311.57  543.15
   0   0  -2 1581.54  135.29
   0   0  -2 1733.33   96.09
  -2   0  -2 6377.06  387.06
  -2   0  -2 7029.80  547.45
   4   0   2   10.10    3.50
   4   0   2   23.00   13.90
  -4   0  -2   15.20    4.00
   6   0   2 1021.80   97.19
  -6   0  -2  868.31   56.89
  -8   0  -2  584.84   39.30
   8   0   2  695.33   43.80
   8   0   2  568.94   66.99
 -10   0  -2  150.28   15.00
 -10   0  -2  214.88   21.00
  10   0   2  157.18   26.70
  10   0   2  199.18   13.90
  10   0   2  171.28   12.60
 -12   0  -2   45.50   13.30
  12   0   2   77.09    7.10
 -12   0  -2   35.50   12.50
 -12   0  -2   52.59    9.70
  14   0   2  211.28   15.30
  14   0   2  224.28   16.80
 -16   0  -2  -10.30   17.10
  16   0   2    8.70    4.20
  16   0   2    8.40    2.70
 -16   0  -2   19.90   16.50
  18   0   2    4.40    4.20
 -18   0  -2   -2.50   17.50
  18   0   2    0.90    2.70
  20   0   2   89.69    9.80
  20   0   2   94.89    8.20
 -20   0  -2  108.89   21.50
  22   0   2   27.60    3.90
  24   0   2    1.80    2.30
  25  -1  -2   20.50    3.20
  25   1  -2   20.30    3.40
  23  -1  -2   77.69    9.10
  23  -1  -2   97.79    7.80
  23   1  -2   79.99    9.20
  23   1  -2   88.69    7.60
  21  -1  -2   21.00    3.80
 -21  -1   2   20.80   19.10
  21  -1  -2   31.10    5.90
 -21   1   2  -15.50   23.20
  21   1  -2   27.10    5.50
  21   1  -2   34.60    4.40
  19  -1  -2   43.60   19.80
 -19  -1   2   76.89   21.60
  19  -1  -2   65.89    8.30
  19  -1  -2   70.99    6.70
  19   1  -2   67.89    6.70
 -19   1   2   69.59   24.90
  19   1  -2   78.29    8.90
  17  -1  -2   48.90   14.50
  17  -1  -2   67.29    7.70
  17  -1  -2   53.19    5.90
 -17  -1   2   56.99   18.10
  17   1  -2   58.59    5.90
  17   1  -2   61.39    8.00
  17   1  -2   81.49   16.60
 -17   1   2   23.00   18.10
  15  -1  -2   38.80   10.50
 -15  -1   2   50.49   16.00
 -15  -1   2   30.10    9.00
  15  -1  -2   42.60    4.80
  15  -1  -2   37.70    5.70
  15  -1  -2   19.80   19.20
  15   1  -2   33.10    4.50
  15   1  -2   30.50    5.10
  15   1  -2   57.39   12.20
 -15   1   2   16.80   13.90
  15   1  -2   35.40   12.20
 -15   1   2   59.99   15.50
  15   1  -2   30.70    4.70
  13  -1  -2   86.49   15.60
 -13  -1   2   95.49   13.30
  13  -1  -2   61.19   20.30
  13  -1  -2  103.69    8.90
  13   1  -2  111.99   15.00
 -13   1   2  128.99   17.70
  13   1  -2   95.79    8.70
  13   1  -2   90.59   15.40
  13   1  -2   96.29    8.10
  11  -1  -2  217.78   38.90
  11  -1  -2  278.57   30.00
 -11  -1   2  272.97   23.20
  11  -1  -2  271.47   37.50
  11  -1  -2  317.47   20.60
  11   1  -2  299.17   19.40
  11   1  -2  322.87   29.40
  11   1  -2  302.87   20.40
 -11   1   2  329.57   31.90
 -11   1   2  267.97   31.60
   9  -1  -2  820.42   89.39
  -9  -1   2  802.62   54.29
   9   1  -2  940.61   74.19
   9   1  -2  802.42   84.79
  -9   1   2  913.61   75.79
   7  -1  -2 1486.35  141.79
  -7  -1   2 1392.76   85.79
  -7   1   2 1585.74  120.39
   7   1  -2 1348.27  118.99
   7   1  -2 1295.87  136.99
   5  -1  -2  606.44   60.69
  -5  -1   2  620.84   37.10
   5   1  -2  554.64   50.69
   5   1  -2  542.55   55.89
  -5   1   2  590.64   50.59
   3  -1  -2 4813.92  430.96
  -3  -1   2 4676.83  260.27
   3   1  -2 4195.68  367.96
  -3   1   2 4247.27  367.46
  -1  -1   2 4423.96  259.87
   1  -1  -2 4709.83  430.86
   1  -1  -2 4479.75  259.37
  -1  -1   2 4755.62  428.86
  -1   1   2 4092.39  367.46
   1   1  -2 4465.85  368.26
  -1  -1  -2 3103.89  175.48
   1  -1   2 3116.79  289.77
  -1  -1  -2 3142.89  290.97
   1   1   2 2881.21  247.48
  -1   1  -2 3090.99  174.58
  -1   1  -2 2753.32  247.88
   3  -1   2 1098.59  105.99
  -3  -1  -2 1072.29   64.29
  -3   1  -2 1046.50   89.79
   3   1   2  979.30   88.89
  -3   1  -2 1131.79   62.49
   5  -1   2 1036.80  100.79
  -5  -1  -2  984.90   60.99
  -5   1  -2 1010.60   58.69
   5   1   2  936.71   83.29
  -5   1  -2 1010.00   84.89
   7  -1   2  373.96   45.80
  -7  -1  -2  369.96   27.80
  -7   1  -2  396.86   25.10
   7   1   2  441.66   35.80
  -7   1  -2  400.06   37.50
   9  -1   2  159.98   26.70
  -9  -1  -2  162.48   24.80
   9  -1   2  195.58   20.70
  -9  -1  -2  189.58   17.30
   9  -1   2  204.28   14.60
   9   1   2  206.78   29.80
   9   1   2  195.48   14.00
   9   1   2  196.78   13.70
   9   1   2  189.18   19.40
  -9   1  -2  203.28   22.10
  11  -1   2  174.98   13.30
 -11  -1  -2  145.29   23.80
 -11  -1  -2  175.48   17.10
  11  -1   2  166.08   25.60
  11  -1   2  140.09   19.70
 -11   1  -2  183.98   21.30
  11   1   2  165.58   12.20
  11   1   2  175.08   12.80
 -13  -1  -2   37.70   12.30
  13  -1   2   31.70    5.40
  13  -1   2   36.00    4.70
 -13  -1  -2   16.30    7.60
  13   1   2   26.00    4.50
 -13   1  -2   27.90   13.60
 -13   1  -2   17.50   15.90
  13   1   2   22.30    4.10
 -17  -1  -2   12.90   13.50
  17  -1   2   24.40    5.70
 -17   1  -2    6.50   14.80
  17   1   2   20.10    3.50
 -17   1  -2  -20.10   18.50
 -17   1  -2    4.40   19.20
  17   1   2   19.70    4.60
  19  -1   2  143.39   13.60
  19  -1   2  172.98   12.10
 -19  -1  -2  140.59   26.80
  19   1   2  154.08   13.30
  19   1   2  152.28   11.70
  21  -1   2    5.80    3.90
  21  -1   2   10.10    3.00
  21   1   2    6.90    2.70
  21   1   2    4.10    3.90
  23  -1   2   31.20    4.10
  23   1   2   26.80    4.10
  24  -2  -2   41.20    4.50
  22  -2  -2   82.79   10.20
  22  -2  -2  105.39    8.10
  22   2  -2   90.59    7.80
  20  -2  -2   97.19   27.50
 -20  -2   2  126.29   24.00
  20  -2  -2  131.49    9.80
  20  -2  -2  109.69   11.20
  20   2  -2  120.49    9.60
  20   2  -2  108.49   11.20
  20   2  -2  123.99   10.50
  18  -2  -2   -3.00   14.30
  18  -2  -2    0.80    2.70
  18  -2  -2    2.40    3.80
 -18  -2   2    5.30   12.40
 -18   2   2   -0.80   21.00
  18   2  -2    2.50    2.60
  18   2  -2    4.90    3.90
 -18   2   2   -7.10   14.70
  18   2  -2    0.10    3.20
  16  -2  -2  460.15   49.20
  16  -2  -2  414.26   31.50
  16  -2  -2  477.85   30.20
 -16  -2   2  481.35   52.39
  16   2  -2  458.65   31.70
  16   2  -2  436.56   30.20
  16   2  -2  420.56   29.90
 -14  -2   2  274.87   28.10
  14  -2  -2  236.38   46.50
  14  -2  -2  352.56   35.50
  14  -2  -2  343.27   22.30
  14  -2  -2  342.77   23.70
 -14  -2   2  322.57   39.70
  14  -2  -2  287.97   45.70
  14   2  -2  313.77   37.90
  14   2  -2  311.97   22.50
 -14   2   2  353.46   39.30
  14   2  -2  331.57   23.50
  14   2  -2  330.67   22.60
  14   2  -2  366.36   34.20
 -12  -2   2  261.07   24.20
 -12  -2   2  245.68   31.50
  12  -2  -2  295.57   35.20
  12  -2  -2  191.48   35.20
  12  -2  -2  307.37   27.40
  12   2  -2  255.47   17.80
  12   2  -2  283.97   28.10
  12   2  -2  234.48   18.20
 -12   2   2  199.58   29.90
  10  -2  -2  540.95   56.69
 -10  -2   2  459.45   53.69
 -10  -2   2  527.35   37.00
  10  -2  -2  408.66   56.99
 -10   2   2  513.15   49.20
  10   2  -2  519.95   47.70
  10   2  -2  509.55   32.20
   8  -2  -2 1279.47  113.69
   8  -2  -2 1009.10  113.79
   8  -2  -2 1099.59  104.39
  -8  -2   2 1014.70  112.49
   8  -2  -2 1106.09  102.19
  -8  -2   2 1122.59   69.79
  -8   2   2 1072.09   96.19
   8   2  -2 1024.60   68.49
   8   2  -2 1127.69   95.99
  -6  -2   2  660.13   40.70
   6  -2  -2  599.54   57.79
   6  -2  -2  631.44   66.09
   6  -2  -2  566.54   56.09
   6   2  -2  567.34   37.70
  -6   2   2  591.44   54.49
   6   2  -2  600.74   55.09
  -4  -2   2  332.47   23.10
   4  -2  -2  322.67   37.50
  -4   2   2  293.97   30.20
   4   2  -2  293.77   31.70
   2  -2  -2  485.75   51.49
  -2  -2   2  449.26   47.80
   2  -2  -2  452.05   28.70
  -2  -2   2  486.55   30.60
   2   2  -2  480.85   43.90
  -2   2   2  428.56   42.00
   0  -2   2  139.49   17.90
   0  -2  -2  133.49   19.60
   0  -2  -2  123.49   11.30
   0  -2   2  117.39   11.00
   0   2   2  121.79   16.00
   0   2  -2  133.79   17.30
   2  -2   2  515.85   53.59
  -2  -2  -2  552.64   33.50
   2  -2   2  456.25   30.90
  -2  -2  -2  474.95   54.09
  -2   2  -2  510.75   46.20
   2   2   2  501.65   45.90
  -4  -2  -2   12.00    4.20
  -4  -2  -2   12.30    5.90
   4  -2   2    8.50    6.50
  -4   2  -2   29.30    8.90
   4   2   2   27.40    8.70
  -6  -2  -2  474.45   49.50
  -6  -2  -2  505.75   33.70
   6  -2   2  456.55   44.70
   6  -2   2  544.55   32.20
   6  -2   2  437.96   52.79
   6   2   2  457.25   43.50
  -6   2  -2  377.76   47.00
  -6   2  -2  438.46   44.70
   6   2   2  511.85   30.50
   8  -2   2    6.40    3.60
  -8  -2  -2   -0.20    5.30
  -8  -2  -2    8.20    5.20
   8  -2   2    0.80    6.10
   8   2   2    5.50    2.60
   8   2   2   11.10    6.60
  -8   2  -2   -2.00    9.70
  -8   2  -2    7.50    6.70
 -10  -2  -2  416.36   46.20
 -10  -2  -2  424.16   32.80
  10  -2   2  429.36   29.70
  10  -2   2  405.06   50.09
 -10   2  -2  435.76   43.80
  10   2   2  418.96   28.00
  12  -2   2  242.68   17.30
 -12  -2  -2  251.57   29.60
  12  -2   2  245.98   18.80
 -12  -2  -2  235.88   23.50
 -12   2  -2  273.27   31.10
  12   2   2  216.38   17.40
  14  -2   2  148.69   22.70
 -14  -2  -2  168.88   22.00
  14  -2   2  148.99   11.50
  14  -2   2  150.78   13.20
 -14   2  -2   97.59   27.70
  14   2   2  141.69   12.10
 -16  -2  -2  150.68   20.30
  16  -2   2  113.49    9.30
  16  -2   2   97.49   10.90
  16   2   2  103.09    9.70
 -16   2  -2   67.39   21.40
 -16   2  -2   59.79   26.30
  18  -2   2   30.70    4.60
 -18  -2  -2   49.99   12.50
  18  -2   2   38.20    6.60
 -18   2  -2   33.80   17.50
 -18   2  -2    0.80   22.00
  18   2   2   25.40    5.10
  20  -2   2   80.29    9.40
  20  -2   2   95.49    7.90
  22  -2   2    1.10    2.30
 -21   3   2   21.40   15.90
  19  -3  -2  197.78   29.30
  19   3  -2  129.59   11.70
  17  -3  -2  -24.20   25.40
 -17   3   2   25.90   17.80
 -17   3   2   20.90   20.70
 -15  -3   2  118.29   18.50
  15  -3  -2  154.88   25.10
  15   3  -2  103.59   10.70
 -13  -3   2  597.44   69.99
 -13  -3   2  742.73   77.59
  13  -3  -2  767.42   82.69
  13  -3  -2  859.61   71.59
  13   3  -2  279.77  162.28
  13   3  -2  729.03   47.60
 -11  -3   2  609.74   61.39
 -11  -3   2  540.75   43.20
  11  -3  -2  551.14   67.89
 -11  -3   2  510.35   55.59
  11  -3  -2  696.43   65.99
  11  -3  -2  502.05   64.89
 -11   3   2  623.94   59.69
  11   3  -2  610.64   37.80
  11   3  -2  489.05  177.68
 -11   3   2  564.84   59.29
  11   3  -2  502.25   55.39
  -9  -3   2  136.49   18.50
  -9  -3   2  176.28   19.00
   9  -3  -2  154.88   17.50
   9  -3  -2  172.28   23.10
   9  -3  -2  169.88   23.40
  -9  -3   2  126.79   17.60
   9   3  -2  146.69   11.80
   9   3  -2  161.18   24.60
  -9   3   2  166.98   20.70
  -9   3   2  146.99   22.60
  -7  -3   2  103.49   14.10
   7  -3  -2   99.29   13.00
  -7  -3   2   95.69   13.80
   7  -3  -2   90.29   20.80
   7  -3  -2  150.18   18.40
  -7  -3   2  104.99   15.20
   7  -3  -2  134.59   16.60
  -7   3   2  107.69   18.30
   7   3  -2  111.49   20.80
   7   3  -2  109.89    9.10
   7   3  -2  110.09   12.80
  -7   3   2  117.59   12.90
   5  -3  -2 1333.27  128.79
  -5  -3   2 1378.86   85.99
   5  -3  -2 1378.66  130.69
   5  -3  -2 1600.94  141.59
  -5  -3   2 1285.97  140.79
  -5  -3   2 1270.67  129.09
   5  -3  -2 1334.57  142.99
   5   3  -2 1393.46   86.29
  -5   3   2 1485.65  122.29
   5   3  -2 1286.97  121.29
  -5   3   2 1420.26  121.49
   5   3  -2 1387.26  121.99
  -3  -3   2   81.29   11.00
   3  -3  -2   87.99   11.70
   3  -3  -2   81.19   10.50
   3  -3  -2   83.79   18.50
  -3  -3   2   80.49   11.30
   3  -3  -2   92.19   11.10
   3   3  -2   72.19   10.60
   3   3  -2   79.99    6.90
  -3   3   2   73.79   10.10
   3   3  -2   74.59   17.70
  -3   3   2   87.29   16.20
   1  -3  -2   11.50    9.10
  -1  -3   2   13.90    5.70
   1  -3  -2   13.90    4.20
   1  -3  -2   14.30    3.90
  -1  -3   2   11.50    4.10
   1  -3  -2   15.10    3.90
  -1   3   2    6.70    8.20
   1   3  -2    4.70    5.00
   1   3  -2   -0.90    8.80
  -1   3   2   16.70    4.80
   1  -3   2  198.98   21.70
  -1  -3  -2  248.58   18.30
  -1  -3  -2  193.78   21.40
  -1  -3  -2  204.78   23.20
   1   3   2  210.98   20.60
   1   3   2  192.88   26.20
  -1   3  -2  218.78   21.10
  -1   3  -2  211.28   25.90
  -3  -3  -2   45.70    9.00
   3  -3   2   40.60    8.20
  -3  -3  -2   45.00    8.30
  -3  -3  -2   46.00    8.10
  -3   3  -2   67.49    9.80
   3   3   2   51.49    7.80
  -3   3  -2   57.49    8.90
   3   3   2   49.00    5.30
  -3   3  -2   43.10   12.60
   3   3   2   36.00   13.60
   5  -3   2  360.76   41.10
  -5  -3  -2  363.66   27.80
  -5  -3  -2  330.47   37.20
   5  -3   2  345.57   34.10
  -5  -3  -2  294.97   33.60
   5   3   2  375.36   23.10
   5   3   2  332.57   32.20
  -5   3  -2  340.67   36.30
  -5   3  -2  356.46   38.00
   5   3   2  292.57   36.50
  -5   3  -2  383.26   32.90
  -7  -3  -2  124.99   16.10
   7  -3   2  128.99   14.90
  -7  -3  -2  105.39   15.60
   7  -3   2  124.39   11.10
   7   3   2  128.69   10.20
  -7   3  -2  111.39   14.80
   7   3   2  113.39   13.10
  -7   3  -2  108.09   21.70
  -9  -3  -2   69.29   11.90
  -9  -3  -2   54.59   12.60
   9  -3   2   70.39   12.20
   9  -3   2   65.99    8.50
  -9   3  -2   75.59   18.90
   9   3   2   30.20  112.39
   9   3   2   65.09    7.70
  11  -3   2   81.79   10.00
  11  -3   2  104.69    8.80
 -11  -3  -2  112.89   15.60
 -11   3  -2  102.79   22.70
  11   3   2   97.49    9.50
  11   3   2   53.59  119.39
  13  -3   2  247.88   17.50
 -13  -3  -2  273.67   30.00
  13  -3   2  212.28   18.90
  13   3   2  230.88   18.00
  15  -3   2   17.00   12.80
 -15  -3  -2   19.50    8.40
  15  -3   2   12.90    3.60
 -15   3  -2   41.50   20.00
 -15   3  -2   21.00   22.20
  15   3   2   18.00    4.90
  17  -3   2   44.90    6.80
 -17  -3  -2   61.79   12.10
  17  -3   2   39.40    5.40
 -17   3  -2   65.19   20.40
  17   3   2   24.70    5.30
 -17   3  -2   10.10   20.70
 -19   3  -2   35.20   16.10
  21  -3   2   30.10    3.50
 -21   3  -2    3.90    8.80
 -20   4   2    3.80   11.70
  18   4  -2   23.30    4.90
 -18   4   2   13.70   17.60
 -18   4   2  -20.60   17.40
  16  -4  -2   45.00   18.70
  14   4  -2   81.79    8.50
  14   4  -2  -42.80  126.49
 -14   4   2   37.20   19.50
 -12  -4   2  144.39   18.90
 -12  -4   2  124.99   17.70
  12  -4  -2  165.78   22.60
  12   4  -2  141.39   12.60
  12   4  -2  -31.90  130.29
  10  -4  -2   61.09   10.50
 -10  -4   2   59.29   10.20
 -10  -4   2   46.10    9.10
  10  -4  -2   90.19   24.80
  10   4  -2   53.89    7.30
 -10   4   2   22.20   13.80
  10   4  -2   12.90  142.89
  -8  -4   2  137.99   19.20
   8  -4  -2  178.88   26.70
  -8  -4   2  114.19   19.50
  -8  -4   2  157.08   21.40
   8  -4  -2  188.38   20.20
   8  -4  -2  180.58   25.30
  -8   4   2  176.08   19.00
   8   4  -2  175.28   13.20
  -8   4   2  176.78   23.60
   8   4  -2  183.18   42.90
   8   4  -2  136.79   18.30
   8   4  -2   12.50  127.69
   6  -4  -2   32.70   13.50
   6   4  -2  -26.60  119.09
   4   4  -2  -51.69  105.49
   2  -4  -2  150.08   17.00
  -2  -4   2  126.89   17.00
   2  -4  -2  135.09   16.50
   2   4  -2  126.09   16.30
   2   4  -2  -21.40  112.69
  -2   4   2  118.49   24.60
   2   4  -2   87.79   22.40
  -2   4   2  145.19   16.00
   0  -4  -2  155.08   18.60
   0  -4   2  159.58   18.50
   0  -4  -2  156.78   18.00
   0   4  -2  100.59   24.40
   0   4   2  136.09   26.60
   0   4  -2  146.59   17.70
   0   4   2  158.78   17.20
   0   4   2   -7.20   97.49
  -2  -4  -2  205.98   24.60
   2  -4   2  219.28   23.90
  -2  -4  -2  221.68   23.20
   2   4   2  221.78   22.60
  -2   4  -2  196.18   32.10
  -2   4  -2  208.18   23.00
   2   4   2  -42.70   89.49
  -4  -4  -2  119.89   15.00
   4  -4   2  133.19   16.20
  -4  -4  -2  126.59   16.20
   4   4   2  -20.20  128.09
   4   4   2  110.99   35.00
  -4   4  -2  108.19   25.10
   4   4   2  123.59   10.10
   4   4   2  117.69   14.60
  -4   4  -2  105.09   16.10
  -4   4  -2  127.69   22.70
  -6  -4  -2  195.78   24.20
  -6  -4  -2  188.28   21.30
   6  -4   2  228.78   23.30
   6   4   2   68.39  138.79
   6   4   2  188.18   21.20
   6   4   2  223.28   15.40
  -6   4  -2  175.58   22.90
  -8  -4  -2   18.50    6.70
   8  -4   2    9.00    6.20
   8   4   2   18.30  133.29
   8   4   2   17.10    4.70
  -8   4  -2   13.10    9.20
  -8   4  -2    5.20   14.00
 -10   4  -2   36.00   15.40
 -10   4  -2   31.90   18.10
  10   4   2   -8.80  148.09
  12  -4   2   27.90   10.90
 -12   4  -2   24.30   17.30
 -12   4  -2    4.60   19.20
  12   4   2   51.69  125.99
 -14  -4  -2   69.19   12.50
  14  -4   2  107.59   19.20
 -14   4  -2   70.99   20.80
 -14   4  -2   17.20   20.50
  14   4   2   21.60  107.39
  14   4   2   59.89    8.00
  16   4   2    2.80    3.30
 -16   4  -2   40.70   18.70
 -16   4  -2  -30.20   15.40
 -18   4  -2   11.90   12.20
 -17   5   2   -0.60   12.00
  15   5  -2   75.99  111.59
 -15   5   2   32.60   19.20
  13  -5  -2   29.80   13.80
 -13   5   2    7.60   15.90
 -13   5   2   -4.70   16.90
  13   5  -2    8.60    4.00
  13   5  -2   24.20  125.19
  11  -5  -2   54.29   13.10
  11  -5  -2   10.20   17.90
 -11  -5   2   26.80   10.60
  11   5  -2   26.20    5.30
 -11   5   2   30.20   15.60
  11   5  -2   24.20  149.29
   9  -5  -2   59.39   11.40
  -9  -5   2   33.60    7.90
   9   5  -2  -38.50  146.89
  -9   5   2   55.79   14.40
   9   5  -2   33.90    5.90
  -9   5   2   37.40   13.70
  -7  -5   2  162.08   19.70
   7   5  -2   71.59  182.48
  -7   5   2  148.19   19.80
   7   5  -2  149.09   19.20
  -5  -5   2  126.89   17.30
   5  -5  -2  141.19   18.10
   5   5  -2   59.49  145.79
  -5   5   2  109.29   17.70
   5   5  -2   92.89   17.30
  -3  -5   2   95.89   15.30
   3  -5  -2  111.29   16.20
   3   5  -2   84.69   15.20
   3   5  -2  -41.90  145.39
  -3   5   2   78.79   14.40
   1   5  -2  160.58   22.00
  -1   5   2  185.88   21.30
   1   5  -2   75.79  144.39
  -1   5   2   84.09  146.09
   1  -5   2    7.40    6.50
  -1  -5  -2   17.10    6.20
   1   5   2   -3.60    7.00
  -1   5  -2   -2.30    8.60
   1   5   2   14.10  137.79
  -3  -5  -2   12.80    5.30
   3  -5   2    4.00    6.10
   3   5   2  -28.90  138.19
   3   5   2    4.20    6.80
  -3   5  -2    2.60    9.50
   5  -5   2   90.89   15.80
   5   5   2  -14.70  145.99
   5   5   2   79.69   13.10
   7   5   2  158.58   16.40
   7   5   2  105.29  164.08
  -7   5  -2  103.19   18.40
   9  -5   2   46.50   11.40
  -9   5  -2   14.60   14.10
   9   5   2   -3.00  135.69
  11  -5   2   68.39   15.10
  11   5   2   10.80  117.79
  13   5   2   11.80   93.79
 -15   5  -2    2.20   15.10
  15   5   2   23.00   77.39
  12   6  -2  -10.60   90.49
  10   6  -2   -3.20   95.19
   8   6  -2    1.20  115.49
   6   6  -2  -29.20  130.49
  -4   6   2   79.59   13.30
   4   6  -2   46.80   11.10
   4   6  -2    1.10  132.79
  -2   6   2   21.10    8.70
   2   6  -2   35.30  122.99
   2   6  -2   11.70    8.80
   0  -6  -2  163.08   17.80
   0  -6   2  132.79   20.00
   2   6   2   10.10    7.20
   2   6   2   26.20  125.69
   4   6   2  -21.30  115.69
   6   6   2   44.30  114.39
   8   6   2  -12.90   95.69
  10   6   2   46.60   93.69
  26   0  -3   14.60    2.70
  24   0  -3    7.60    2.80
  22   0  -3   79.89    9.20
  22   0  -3   83.49    7.40
 -22   0   3   48.70   25.80
  20   0  -3   17.00    3.50
  20   0  -3   12.50   16.90
  20   0  -3   15.20    4.70
 -20   0   3   53.69   24.50
  18   0  -3   22.30    3.50
  18   0  -3   20.00    4.80
 -18   0   3   48.90   21.20
  18   0  -3    6.30   14.60
  16   0  -3   12.70    2.80
  16   0  -3   14.80    4.00
 -16   0   3   38.70   12.40
 -16   0   3   17.90   14.60
  16   0  -3   21.60   11.40
  14   0  -3  169.88   12.80
  14   0  -3  167.58   22.80
  14   0  -3  135.99   19.50
  12   0  -3  908.11   57.29
 -12   0   3  873.61   54.59
  12   0  -3  901.11   91.09
  12   0  -3  781.52   75.69
  10   0  -3  140.19   27.30
  10   0  -3  199.08   25.00
  10   0  -3  197.58   13.40
 -10   0   3  197.28   15.00
  10   0  -3  183.38   19.80
   8   0  -3  388.96   38.80
   8   0  -3  326.07   31.90
  -8   0   3  336.57   23.20
   6   0  -3    4.80    4.10
  -6   0   3    3.30    3.20
   4   0  -3 7224.58  737.33
   4   0  -3 8236.58  633.54
   2   0  -3  535.55   31.50
   2   0  -3  502.55   52.79
   2   0  -3  544.25   44.10
   0   0  -3 2887.61  244.58
   0   0  -3 3108.79  173.58
  -2   0  -3 3673.03  301.67
  -2   0  -3 3712.23  214.18
  -4   0  -3 1422.56  114.09
  -4   0  -3 1330.17   81.79
   6   0   3  618.84   73.79
  -6   0  -3  673.83   43.10
  -6   0  -3  752.12   58.99
  -8   0  -3  417.96   30.00
   8   0   3  490.65   30.50
  -8   0  -3  446.06   40.30
   8   0   3  409.06   51.89
  10   0   3   21.70    4.20
 -10   0  -3   17.50   10.40
 -10   0  -3   20.90    5.90
  10   0   3   31.00   10.70
  10   0   3   22.10    3.60
 -10   0  -3   25.00    9.90
  14   0   3  156.58   12.50
  14   0   3  149.19   10.70
 -14   0  -3   99.19   20.20
  16   0   3   48.20    5.40
 -16   0  -3   13.40   13.10
  16   0   3   56.09    7.20
 -16   0  -3   33.90   17.10
  18   0   3  103.99   10.30
  18   0   3   93.59    8.10
 -18   0  -3   69.29   21.20
  22   0   3   15.50    3.10
  25  -1  -3   19.10    3.10
  25   1  -3   17.50    3.30
  23  -1  -3   20.40    4.90
  23  -1  -3   19.40    3.60
 -23  -1   3   18.00   15.80
  23   1  -3   22.30    3.70
  23   1  -3   22.80    5.10
  21  -1  -3  145.99   28.30
 -21  -1   3  122.19   25.80
  21  -1  -3  122.19   11.90
  21  -1  -3  130.69   10.20
  21   1  -3  132.09   10.20
 -21   1   3   62.09   29.20
  21   1  -3  133.49   12.30
 -19  -1   3   48.20   19.00
  19  -1  -3   24.60    5.30
  19  -1  -3   24.50    3.90
  19  -1  -3   15.50   16.20
 -19   1   3   45.30   23.50
  19   1  -3   21.40    5.30
  19   1  -3   22.90    4.00
  17  -1  -3    1.40    2.40
 -17  -1   3   34.40   17.50
  17  -1  -3   -2.60    3.00
  17  -1  -3    1.00   11.00
  17  -1  -3   13.20   21.90
  17   1  -3   -7.40   11.60
  17   1  -3   19.60    7.70
 -17   1   3    3.20    8.70
 -17   1   3  -19.90   14.50
  17   1  -3    3.20    3.80
  17   1  -3   -1.80    2.30
 -15  -1   3   32.70   14.80
  15  -1  -3   36.90   20.00
 -15  -1   3    9.10    7.00
  15  -1  -3   14.80    3.90
 -15   1   3    9.00    8.20
  15   1  -3   24.80    8.60
  15   1  -3   10.60   10.30
 -15   1   3    8.20   11.90
 -13  -1   3   55.59   10.40
 -13  -1   3   42.90   13.80
  13  -1  -3   66.39   10.70
  13  -1  -3   46.60   17.60
  13  -1  -3   69.39    6.70
 -13   1   3  103.79   18.50
  13   1  -3   76.99   13.40
  13   1  -3   56.39    6.10
  13   1  -3   60.49   12.30
 -13   1   3   47.30   11.10
  13   1  -3   67.39    6.80
  11  -1  -3   74.49   17.50
  11  -1  -3   74.69   18.80
  11  -1  -3  131.69   14.60
 -11  -1   3  109.59   13.20
  11  -1  -3   98.39    8.50
 -11   1   3  100.69   14.80
  11   1  -3   96.89    8.50
  11   1  -3   96.09    8.00
 -11   1   3  123.19   16.50
  11   1  -3  121.99   14.90
   9  -1  -3 1148.09  126.19
  -9  -1   3 1121.99   76.39
  -9   1   3 1348.37  107.69
   9   1  -3 1354.76  106.19
   7  -1  -3  162.78   23.20
  -7  -1   3  143.09   14.40
   7   1  -3  146.69   18.40
   7   1  -3  194.48   17.10
  -7   1   3  165.18   18.60
   5  -1  -3  218.78   26.90
  -5  -1   3  217.58   16.60
  -5   1   3  222.08   21.20
   5   1  -3  207.98   22.20
  -3  -1   3 2862.71  273.37
   3  -1  -3 2769.12  165.68
  -3  -1   3 2937.41  167.48
   3  -1  -3 2986.70  277.67
   3   1  -3 2831.42  236.78
  -3   1   3 2821.92  235.98
   1  -1  -3 7313.77  426.06
  -1  -1   3 7345.17  704.23
   1  -1  -3 7899.01  707.03
   1   1  -3 7574.74  426.26
  -1   1   3 6682.83  603.04
   1   1  -3 7473.55  604.14
  -1  -1  -3 1385.06   81.59
   1  -1   3 1370.96  134.59
  -1   1  -3 1500.15   80.79
   1   1   3 1314.77  113.89
  -1   1  -3 1311.87  114.79
  -3  -1  -3  286.27   20.20
   3  -1   3  282.67   32.70
  -3   1  -3  273.37   26.50
  -3   1  -3  307.17   18.10
   3   1   3  270.87   25.30
  -5  -1  -3  566.84   39.20
   5  -1   3  641.54   65.89
   5   1   3  662.73   52.29
  -5   1  -3  608.34   37.20
  -5   1  -3  581.84   53.89
  -7  -1  -3  323.97   24.70
   7  -1   3  332.87   41.30
   7  -1   3  361.46   23.90
  -7   1  -3  329.87   32.80
   7   1   3  342.57   30.60
   7   1   3  355.86   22.60
  -7   1  -3  329.77   22.10
   9  -1   3  148.49   11.20
   9  -1   3   86.39   20.60
  -9  -1  -3  128.19   19.60
  -9  -1  -3  133.79   14.30
  -9  -1  -3  142.09   16.00
  -9   1  -3  136.29   17.20
   9   1   3  143.19   10.30
   9   1   3  134.49   25.30
   9   1   3  122.59   10.30
 -11  -1  -3  220.18   26.20
  11  -1   3  242.48   16.60
  11  -1   3  198.28   29.20
 -11  -1  -3  177.68   26.60
 -11  -1  -3  223.48   20.00
  11   1   3  203.68   15.20
  11   1   3  222.58   15.90
  13  -1   3   25.80    3.80
 -13  -1  -3   22.50    8.30
 -13  -1  -3   25.70   10.10
  13  -1   3   36.00    5.70
  13   1   3   30.20    3.70
  13   1   3   18.00    4.10
  13   1   3   28.30    4.60
 -13   1  -3   20.60   16.10
 -13   1  -3    7.20   13.60
 -13   1  -3   -6.40   12.90
  15  -1   3   71.19    8.80
  15  -1   3   69.39    6.60
 -15  -1  -3   57.99   15.10
 -15   1  -3   66.29   21.80
  15   1   3   69.29    7.90
 -15   1  -3   51.09   17.40
 -15   1  -3   26.30   18.50
  15   1   3   64.19    7.10
  15   1   3   73.19    6.20
  17  -1   3  183.68   16.30
  17  -1   3  203.78   14.60
 -17  -1  -3  235.78   30.60
  17   1   3  182.98   14.10
  17   1   3  194.38   15.80
  19  -1   3  101.59    8.70
  19  -1   3  108.09   10.80
  19   1   3  109.49   10.20
  19   1   3   93.79    8.30
  21  -1   3   95.29    7.90
  21   1   3   95.69    7.90
  23  -1   3    3.10    2.20
  24  -2  -3    2.40    2.30
  24   2  -3    3.30    2.70
  22  -2  -3   22.40    3.60
  22  -2  -3   18.60    4.60
  22   2  -3   23.70    3.70
  22   2  -3   18.80    4.50
  20  -2  -3   19.00    5.00
  20  -2  -3   18.10    3.60
  20  -2  -3  -12.50   20.60
 -20  -2   3    3.20   13.70
  20   2  -3   15.80    4.80
  20   2  -3   19.40    4.50
 -20   2   3  -29.10   20.00
 -20   2   3    5.30   14.40
  20   2  -3   16.30    3.50
 -20   2   3   28.30   22.30
  18  -2  -3  145.09   13.50
 -18  -2   3  164.98   28.10
  18  -2  -3  163.48   24.80
  18  -2  -3  167.98   12.00
  18   2  -3  152.88   13.70
  18   2  -3  161.48   11.90
  18   2  -3  143.89   12.70
  16  -2  -3   61.19   13.00
  16  -2  -3   42.70    6.50
  16  -2  -3   62.79    5.90
  16  -2  -3   47.80   24.80
 -16  -2   3   58.49   15.30
  16   2  -3   54.99    5.60
  16   2  -3   52.69    7.10
 -16   2   3   12.80   16.40
  16   2  -3   61.39    7.20
  14  -2  -3   21.50    4.50
  14  -2  -3   36.80    9.30
  14  -2  -3   16.50   18.50
 -14  -2   3    8.40    8.30
  14  -2  -3   58.79   22.20
 -14  -2   3   27.50   12.00
 -14   2   3    5.40   11.70
  14   2  -3   25.80    4.80
  14   2  -3   30.00   10.90
  14   2  -3   44.70   10.10
 -14   2   3   34.20   13.10
  14   2  -3   16.50    4.20
 -12  -2   3   94.19   19.10
  12  -2  -3  114.39   15.10
  12  -2  -3   90.39    8.40
  12  -2  -3  132.19   19.50
 -12  -2   3   85.39   13.80
  12  -2  -3   80.89   19.30
 -12   2   3  109.59   17.70
  12   2  -3   87.79    8.40
  12   2  -3  120.49   16.60
  12   2  -3   87.29    8.60
 -12   2   3   78.09   16.20
 -10  -2   3  145.39   22.20
 -10  -2   3  173.98   18.10
  10  -2  -3  164.88   25.40
  10  -2  -3  165.08   12.40
  10  -2  -3  179.78   18.30
  10  -2  -3  144.29   25.70
 -10   2   3  173.08   22.20
  10   2  -3  166.48   22.20
  10   2  -3  166.58   12.60
  10   2  -3  164.58   12.10
   8  -2  -3  789.92   84.09
   8  -2  -3  753.12   74.49
  -8  -2   3  667.53   79.99
   8  -2  -3  867.41   80.79
  -8  -2   3  856.01   51.69
   8  -2  -3  801.02   72.59
   8   2  -3  717.63   50.89
   8   2  -3  709.33   48.70
  -8   2   3  727.43   69.59
   8   2  -3  915.81   70.89
  -6  -2   3  975.60   59.09
   6  -2  -3  919.01   86.69
   6  -2  -3  912.61   97.49
   6  -2  -3  947.71   88.19
   6   2  -3  906.51   82.09
   6   2  -3  913.01   58.19
  -6   2   3  928.81   81.49
  -4  -2   3  338.47   24.20
   4  -2  -3  350.16   40.50
   4   2  -3  338.67   34.20
  -4   2   3  311.87   32.20
   2  -2  -3 1243.18  120.89
   2  -2  -3 1166.88   70.29
  -2  -2   3 1130.19  116.19
  -2  -2   3 1182.18   71.69
   2   2  -3 1242.58  102.49
  -2   2   3 1155.88  100.99
   0  -2  -3  800.52   48.30
   0  -2   3  784.82   79.19
   0  -2   3  717.13   47.80
   0  -2  -3  775.72   81.89
   0   2   3  802.82   68.39
   0   2  -3  809.42   69.29
  -2  -2  -3  227.58   17.50
   2  -2   3  209.88   15.30
   2  -2   3  198.88   26.50
  -2   2  -3  236.38   24.40
   2   2   3  218.48   23.10
  -4  -2  -3 1376.06  137.79
  -4  -2  -3 1419.46   83.19
   4  -2   3 1292.87  135.69
   4   2   3 1265.57  114.39
  -4   2  -3 1279.07  115.89
   4   2   3 1454.85   84.29
  -6  -2  -3  615.74   40.70
  -6  -2  -3  579.34   61.99
   6  -2   3  513.55   64.69
   6  -2   3  591.24   56.19
   6  -2   3  636.14   40.20
   6   2   3  570.24   52.99
   6   2   3  625.44   38.20
  -6   2  -3  595.94   55.59
   8  -2   3  168.88   16.80
  -8  -2  -3  141.09   18.70
  -8  -2  -3  163.48   16.90
   8  -2   3  109.49   22.70
   8  -2   3  164.28   12.80
   8   2   3  141.79   11.30
  -8   2  -3  139.39   20.30
 -10  -2  -3    5.70    6.70
  10  -2   3    7.10    4.20
 -10  -2  -3    9.70    6.30
  10  -2   3   16.00    5.50
 -10   2  -3   -1.80   15.20
 -10   2  -3   11.40    8.10
  10   2   3   10.00    3.60
 -12  -2  -3  660.13   46.90
  12  -2   3  639.74   42.40
 -12  -2  -3  739.73   68.89
  12  -2   3  555.94   43.60
  12   2   3  606.84   41.50
  14  -2   3   73.69    9.40
  14  -2   3   87.49    8.00
 -14  -2  -3  111.89   16.80
 -14   2  -3   77.19   25.20
  14   2   3   74.69    8.40
 -14   2  -3   55.09   19.40
  16  -2   3  133.29   12.90
 -16  -2  -3  156.38   21.00
  16  -2   3  161.18   11.30
  16   2   3  122.69   11.40
 -16   2  -3   92.39   28.40
 -16   2  -3  107.09   24.30
 -18  -2  -3   80.69   14.50
  18  -2   3   50.19    7.70
  18  -2   3   70.49    7.00
 -18   2  -3   63.59   18.20
  18   2   3   55.89    7.20
  20  -2   3    8.60    3.00
 -20   2  -3    6.70   12.90
  22  -2   3   39.70    4.50
 -22   2  -3   56.39   10.90
 -23   3   3    5.80   13.10
 -21   3   3   10.30   15.80
  19  -3  -3   42.00   20.70
 -19   3   3   17.80   16.30
 -19   3   3    9.90   19.50
  19   3  -3   27.40    5.00
 -17  -3   3  173.88   24.60
  17  -3  -3  234.98   33.90
  17   3  -3  158.28   14.10
 -15  -3   3  291.97   34.40
  15  -3  -3  344.27   35.90
 -15  -3   3  254.57   30.90
  15   3  -3  272.47   20.60
  13  -3  -3    5.20   17.00
  13  -3  -3   41.20   22.90
  13  -3  -3    7.20    7.20
 -13  -3   3    3.00    5.70
 -13  -3   3    2.60    5.80
  13   3  -3   36.80   10.70
  13   3  -3   10.10  109.99
  13   3  -3    6.50    4.00
 -11  -3   3  527.35   58.09
 -11  -3   3  476.95   53.09
 -11  -3   3  468.05   40.80
  11  -3  -3  625.34   53.49
  11  -3  -3  583.14   61.99
  11  -3  -3  485.75   61.79
  11  -3  -3  503.15   61.19
 -11   3   3  635.74   56.59
  11   3  -3  573.34   35.90
  11   3  -3  514.55   54.19
 -11   3   3  536.55   56.69
  11   3  -3  346.97  168.18
   9  -3  -3  210.18   25.90
   9  -3  -3  250.27   26.00
  -9  -3   3  177.38   22.40
  -9  -3   3  184.18   20.20
   9  -3  -3  186.98   21.20
  -9  -3   3  175.88   21.50
   9  -3  -3  226.18   29.30
  -9   3   3  183.78   26.50
   9   3  -3  183.48   26.60
   9   3  -3  184.98   14.20
  -7  -3   3  396.76   29.50
   7  -3  -3  360.06   36.00
  -7  -3   3  337.67   39.00
   7  -3  -3  364.56   38.40
   7  -3  -3  334.37   46.60
   7  -3  -3  417.86   40.60
  -7  -3   3  331.47   36.50
   7   3  -3  367.26   34.40
  -7   3   3  385.06   39.60
   7   3  -3  364.26   24.40
   7   3  -3  373.26   40.60
  -7   3   3  382.26   34.40
  -5  -3   3  113.69   13.90
   5  -3  -3  110.49   13.00
  -5  -3   3  112.99   14.10
   5  -3  -3  119.89   14.50
   5  -3  -3  116.09   14.70
   5  -3  -3   91.79   21.40
   5   3  -3  116.09   21.40
   5   3  -3  110.59    8.80
  -5   3   3  106.99   12.70
  -5   3   3  110.59   18.40
   5   3  -3  105.09   13.30
   3  -3  -3  596.94   60.59
  -3  -3   3  586.84   60.99
   3  -3  -3  639.54   73.09
   3  -3  -3  637.54   66.39
   3  -3  -3  676.53   61.79
  -3  -3   3  590.14   42.10
   3   3  -3  621.14   60.89
  -3   3   3  679.83   57.89
  -3   3   3  664.43   60.29
   3   3  -3  644.74   40.60
   3   3  -3  678.13   57.89
   1  -3  -3   -0.80    8.00
  -1  -3   3    3.90    3.30
  -1  -3   3    8.20    4.90
   1  -3  -3    7.30    3.10
   1  -3  -3    4.40    3.20
   1  -3  -3    3.40    3.10
  -1   3   3    3.40    3.70
   1   3  -3    2.20    9.50
   1   3  -3   -3.80    4.90
  -1   3   3    1.90    8.20
   1  -3   3  143.49   16.60
  -1  -3  -3  161.88   24.60
  -1  -3  -3  149.59   14.40
  -1  -3  -3  141.99   17.40
  -1  -3  -3  134.39   15.90
  -1  -3  -3  143.89   15.70
   1   3   3  156.78   11.10
  -1   3  -3  162.78   22.60
  -1   3  -3  150.38   16.40
   1   3   3  145.09   15.50
   1   3   3  142.39   21.50
   3  -3   3    3.00    3.50
   3  -3   3    3.50    2.90
  -3  -3  -3    1.20    2.90
  -3  -3  -3    8.70    6.50
  -3  -3  -3    3.40    3.40
   3   3   3    5.90    2.80
  -3   3  -3   11.00    6.30
   3   3   3  -11.00    8.50
   3   3   3    3.20    4.00
  -3   3  -3    6.80    9.00
  -3   3  -3   -1.30    5.50
   5  -3   3  403.26   30.10
  -5  -3  -3  441.36   46.40
  -5  -3  -3  479.95   33.40
   5  -3   3  418.86   42.20
   5  -3   3  460.45   49.80
  -5   3  -3  417.16   45.40
  -5   3  -3  422.46   40.50
   5   3   3  420.76   39.90
   5   3   3  451.45   28.70
   7  -3   3   44.40    7.50
  -7  -3  -3   45.90    8.60
   7  -3   3   37.00    6.40
  -7  -3  -3   59.69   11.80
  -7   3  -3   39.40   13.60
  -7   3  -3   12.80   12.30
  -7   3  -3   35.30    8.80
   7   3   3   56.99    6.40
   7   3   3   40.60    7.00
   9  -3   3   62.49    7.00
  -9  -3  -3   54.79   12.20
   9  -3   3   55.89    8.00
  -9  -3  -3   72.19   11.70
   9  -3   3   80.89   12.40
  -9   3  -3   73.39   19.40
   9   3   3   75.39  117.69
   9   3   3   64.49    7.60
 -11  -3  -3   12.60    6.40
  11  -3   3   12.60    5.20
  11  -3   3   26.50    7.90
  11  -3   3   11.40    3.90
  11   3   3  -24.20  100.59
 -11   3  -3   20.50   19.70
 -11   3  -3   27.20   15.50
  11   3   3   12.40    4.50
  13  -3   3  444.46   34.50
  13  -3   3  499.85   32.90
 -13  -3  -3  502.15   53.59
  13   3   3  486.15   32.70
  15  -3   3  101.09   11.40
  15  -3   3  115.49    9.60
 -15  -3  -3  117.19   17.00
 -15   3  -3  101.59   24.70
 -15   3  -3   73.89   26.20
  15   3   3  120.59   10.60
  17  -3   3   56.09    6.10
 -17  -3  -3   63.79   12.20
  17  -3   3   43.60    7.00
 -17   3  -3   71.09   20.30
  17   3   3   59.99    7.30
  19  -3   3   32.80    4.20
 -19   3  -3   32.10   14.60
  21  -3   3    3.30    2.60
 -21   3  -3  -12.10    6.80
 -20   4   3    8.60   12.50
  18  -4  -3   51.59   20.40
  18   4  -3   18.80    4.30
 -18   4   3    6.50   16.40
 -18   4   3   24.40   16.90
  16  -4  -3   63.69   18.30
  16   4  -3   40.70    6.50
 -16   4   3   -1.40   16.60
  16   4  -3    8.30  111.19
  14  -4  -3   65.19   15.60
  14   4  -3   68.79  142.89
 -12  -4   3   27.60    7.80
  12  -4  -3   52.09   10.70
  12  -4  -3   29.50   17.50
  12   4  -3   36.10    5.80
  12   4  -3   69.69  146.69
 -12   4   3   12.20   14.80
  10  -4  -3   90.19   19.90
  10  -4  -3  138.99   17.90
 -10  -4   3  117.49   16.50
  10   4  -3  -67.99  134.29
  10   4  -3  115.09   10.70
 -10   4   3  109.99   19.10
  -8  -4   3   49.40    9.70
   8  -4  -3   62.59   17.80
   8  -4  -3   56.19   12.50
   8  -4  -3   61.69   10.20
   8   4  -3  -17.20  127.09
   8   4  -3   60.89    7.20
  -8   4   3   70.89   11.10
   6  -4  -3  131.99   22.70
  -6  -4   3  142.39   17.80
  -6  -4   3   97.09   16.20
   6  -4  -3  142.09   17.90
   6  -4  -3  172.98   25.20
   6  -4  -3  181.78   20.10
  -6   4   3  146.29   24.90
   6   4  -3   -2.40  111.79
   6   4  -3  150.78   11.60
  -6   4   3  150.38   17.10
   6   4  -3  101.39   25.60
   6   4  -3  130.49   17.50
  -4  -4   3   90.59   13.80
   4  -4  -3   85.89   16.10
   4  -4  -3   90.79   13.10
   4  -4  -3  108.99   13.90
   4   4  -3   57.59   20.50
   4   4  -3   71.39   13.60
  -4   4   3   87.49   21.80
  -4   4   3  111.79   13.10
   4   4  -3  -43.50  121.49
   2  -4  -3  163.58   19.50
  -2  -4   3  149.09   18.90
   2  -4  -3  157.68   19.40
   2  -4  -3  169.68   18.50
   2   4  -3  -37.60  113.99
   2   4  -3  107.79   26.10
  -2   4   3  147.69   27.00
  -2   4   3  182.28   18.20
   2   4  -3  144.49   18.50
   0  -4   3  158.58   18.50
   0  -4  -3  156.68   17.70
   0  -4  -3  159.38   18.80
   0   4  -3   95.89   24.00
   0   4   3  -10.10  108.09
   0   4   3  113.49   25.80
   0   4  -3  137.29   18.10
   0   4   3  162.78   17.30
   2  -4   3   38.40    7.80
  -2  -4  -3   47.40    7.70
  -2  -4  -3   43.10    8.70
  -2   4  -3   29.70    9.80
   2   4   3   -3.90   16.10
  -2   4  -3   25.70   17.90
   2   4   3    4.90  114.49
   2   4   3   41.40    8.20
  -4  -4  -3  277.17   32.20
   4  -4   3  300.87   30.40
   4   4   3  312.77   20.10
  -4   4  -3  245.38   38.00
   4   4   3  282.57   28.40
   4   4   3   72.79  136.19
  -4   4  -3  258.27   29.70
  -6  -4  -3  283.27   32.10
   6  -4   3  297.57   30.10
   6   4   3   30.40  137.19
   6   4   3  275.57   19.70
   6   4   3  257.17   27.50
  -8  -4  -3   21.10    7.00
   8  -4   3   28.60    7.90
   8   4   3   44.20  134.99
  -8   4  -3   22.20   15.70
  -8   4  -3   16.30   13.10
   8   4   3   23.70    5.00
  -8   4  -3   15.60    9.80
 -10  -4  -3  124.79   18.10
  10   4   3  132.89   11.60
  10   4   3   42.40  146.09
 -12  -4  -3  116.09   16.20
  12   4   3   14.60  122.19
 -12   4  -3   76.29   21.30
 -12   4  -3   61.69   23.80
  12   4   3  122.39   10.60
 -14  -4  -3   28.30    7.90
 -14   4  -3  -10.60   18.00
 -14   4  -3   40.00   19.30
  14   4   3   17.20    4.70
  14   4   3   51.99  111.39
 -16   4  -3   67.39   19.60
 -18   4  -3    3.90   10.50
  17   5  -3   97.79  107.99
 -15   5   3   14.70   18.10
  15   5  -3   51.99  109.89
  13  -5  -3   24.80   13.50
 -13   5   3   20.30   15.80
  13   5  -3    4.20  123.19
  11  -5  -3   67.19   22.30
 -11  -5   3   96.49   14.10
  11   5  -3  -25.10  144.99
  11   5  -3   93.19    9.10
  -9  -5   3  188.88   20.30
   9  -5  -3  122.59   27.20
   9   5  -3  134.59   12.40
   9   5  -3  -89.79  154.38
  -9   5   3  163.38   18.70
  -7  -5   3   20.50    7.40
   7  -5  -3  -22.90   18.20
   7  -5  -3   26.40    8.10
   7   5  -3  -10.20  160.98
   7   5  -3   12.50    9.00
  -7   5   3   29.30    9.50
   5  -5  -3  103.19   15.50
  -5  -5   3   86.79   14.40
   5   5  -3  -17.00  152.28
  -5   5   3   67.59   13.40
   5   5  -3   60.49   13.60
  -3  -5   3   63.69   11.10
   3  -5  -3   52.19    9.30
   3   5  -3   16.20  147.89
  -3   5   3   53.59   11.50
   3   5  -3   25.90   11.20
   1   5  -3    3.90  131.19
  -1   5   3   11.90  124.29
   1   5  -3  141.69   19.90
  -1   5   3  158.88   18.80
  -1  -5  -3   17.10    5.50
  -1   5  -3   -9.50    9.20
   1   5   3   -2.30    6.30
   1   5   3   70.59  152.38
   3  -5   3   23.50    7.50
   3   5   3  -19.30  118.69
   3   5   3   28.40    8.50
  -3   5  -3   11.00   10.40
   5  -5   3   97.49   16.30
   5   5   3  -69.19  121.99
   5   5   3   65.99   11.90
   7   5   3  -51.29  148.89
   9  -5   3   41.20   10.70
   9   5   3    5.40  125.39
  11  -5   3  144.79   24.90
  11   5   3  -22.90  108.09
  13   5   3   28.30   98.59
 -13   5  -3   -6.30   17.30
 -15   5  -3   27.90   15.00
  12   6  -3   22.90   89.39
  10   6  -3  -31.90  111.89
   8   6  -3  -66.29  113.59
   6   6  -3  -16.50  136.59
   4   6  -3   27.40    9.60
  -4   6   3   32.70    9.10
   4   6  -3  -51.99  116.49
  -2  -6   3   28.30    7.80
  -2   6   3   21.40    8.40
   2   6  -3   13.50  123.79
   0   6   3  -53.69  132.29
   0   6  -3   34.00   10.40
   2   6   3   14.20  115.69
   2   6   3   41.30    8.70
  -2   6  -3   15.30    9.60
   4   6   3   -2.00  113.29
   6   6   3  -56.69   95.89
   8   6   3   37.10  105.09
  10   6   3   27.00   74.89
  26   0  -4   24.20    3.30
 -24   0   4  145.89   30.60
  24   0  -4  173.78   14.30
  24   0  -4  179.58   12.80
 -22   0   4   39.00   25.80
  22   0  -4   64.59    8.50
  22   0  -4   64.49    6.60
  20   0  -4  -15.50   16.60
 -20   0   4   37.40   23.80
  20   0  -4    2.40    3.90
  20   0  -4    2.80    2.70
  18   0  -4    9.80    2.80
 -18   0   4   24.50   17.80
  18   0  -4   12.30   13.40
  18   0  -4   13.50    4.40
  16   0  -4   72.29    7.60
  16   0  -4   62.49    6.00
  16   0  -4   68.79   13.90
  14   0  -4 1030.80  104.79
  14   0  -4 1061.59   96.49
  14   0  -4 1204.18   72.69
  12   0  -4  751.92   69.09
  12   0  -4  790.52   81.99
 -12   0   4  790.92   49.50
  12   0  -4  784.32   51.59
  12   0  -4  781.22   74.89
  10   0  -4    0.70    4.50
  10   0  -4    6.40    7.10
 -10   0   4    5.50    3.70
  10   0  -4    8.70   11.00
  10   0  -4    1.60    2.20
  10   0  -4   -0.20    4.40
  -8   0   4   53.49    6.90
   8   0  -4   53.59    9.20
   6   0  -4  272.37   24.00
  -6   0   4  245.28   17.60
   4   0  -4 2007.40  152.28
   4   0  -4 1846.72  107.79
   4   0  -4 1680.93  178.58
   2   0  -4   32.20    4.40
   2   0  -4   29.60    3.60
   0   0  -4 2053.09  177.08
   0   0  -4 2290.17  126.39
  -2   0  -4   18.40    3.10
  -2   0  -4   19.20    4.10
   2   0   4   20.10   11.00
  -4   0  -4 1450.25   85.39
  -4   0  -4 1416.66  118.39
  -6   0  -4  113.49   12.40
  -6   0  -4  118.49   11.30
  -8   0  -4   59.09    8.40
   8   0   4   61.89    6.40
   8   0   4   62.39    5.90
   8   0   4   37.80   14.70
  -8   0  -4   44.80   11.20
 -10   0  -4  362.76   26.80
  10   0   4  384.26   26.20
  10   0   4  361.86   24.60
  10   0   4  390.56   47.20
  12   0   4  351.56   22.90
 -12   0  -4  262.37   35.50
  16   0   4   63.49    8.20
 -16   0  -4   45.80   12.70
  16   0   4   62.19    6.00
 -16   0  -4   28.30   16.00
 -16   0  -4   48.60   14.50
  18   0   4   96.79    8.30
  18   0   4   96.79   10.20
  20   0   4   15.20    3.30
  20   0   4   12.90    4.50
  22   0   4    1.90    2.90
  25  -1  -4   43.10    4.80
  25   1  -4   37.80    4.70
  23  -1  -4   10.80    4.40
  23  -1  -4   10.30    3.10
 -23  -1   4  -16.10   17.20
  23   1  -4    7.30    4.20
  23   1  -4   12.00    3.10
 -23   1   4  -36.40   22.00
  21  -1  -4   27.40    4.10
 -21  -1   4   32.90   20.60
  21  -1  -4  -12.20   21.20
  21  -1  -4   21.90    5.20
 -21   1   4   20.90   25.50
  21   1  -4   22.30    4.00
  21   1  -4   28.60    6.00
  19  -1  -4  243.48   19.40
  19  -1  -4  257.37   17.80
 -19  -1   4  215.38   40.70
  19  -1  -4  219.08   37.60
  19   1  -4  256.67   18.00
  19   1  -4  252.67   19.70
  19   1  -4  310.87   37.70
 -17  -1   4   34.20   17.70
  17  -1  -4   14.20    3.20
  17  -1  -4   11.30   21.90
  17  -1  -4   11.50   10.80
  17  -1  -4   14.40    4.10
 -17   1   4   14.40   10.70
  17   1  -4   15.70    4.60
 -17   1   4    7.20   14.00
  17   1  -4   34.10    9.60
  17   1  -4   11.10   12.10
  17   1  -4   13.70    3.10
  15  -1  -4   78.79    8.30
  15  -1  -4   97.79   18.60
 -15  -1   4   52.49   17.70
 -15  -1   4   67.49   12.30
  15  -1  -4   52.59   21.10
 -15   1   4  126.09   22.20
  15   1  -4  126.09   21.50
  15   1  -4   94.99   15.00
  15   1  -4   87.29    8.60
  15   1  -4   93.19    7.80
  13  -1  -4  113.59   23.40
 -13  -1   4  147.19   16.00
  13  -1  -4  136.59   11.20
  13   1  -4  138.99   10.70
 -13   1   4  152.98   19.00
  13   1  -4  124.29   11.30
  13   1  -4  179.68   19.10
 -13   1   4  181.78   22.30
 -11  -1   4 1698.93  101.59
  11  -1  -4 1563.24  154.18
  11  -1  -4 1655.03  167.58
  11  -1  -4 1665.53  107.59
  11   1  -4 1536.35  107.59
  11   1  -4 1526.95  155.38
  11   1  -4 1753.52  103.09
  11   1  -4 1900.31  140.89
  -9  -1   4  501.85   37.80
   9  -1  -4  495.75   62.09
   9   1  -4  661.93   52.29
  -9   1   4  633.24   53.29
  -7  -1   4  150.38   14.20
   7  -1  -4  158.58   22.50
  -7   1   4  173.88   18.30
   7   1  -4  162.68   18.50
   5  -1  -4  329.17   19.50
   5  -1  -4  320.77   36.60
  -5  -1   4  307.57   22.40
   5   1  -4  295.97   30.40
  -5   1   4  339.37   29.70
   3  -1  -4 3195.38  195.18
  -3  -1   4 3448.65  322.37
   3  -1  -4 3538.15  326.67
   3   1  -4 3292.97  278.17
  -3   1   4 3396.46  277.27
  -1  -1   4 1112.99  111.59
   1  -1  -4 1068.39   67.39
   1  -1  -4 1187.28  114.49
   1   1  -4 1165.28   96.19
  -1   1   4 1100.79   94.69
   1   1  -4 1215.48   67.69
  -1  -1  -4   37.40    6.10
   1  -1   4   24.50    8.40
   1   1   4   31.10    5.30
  -1   1  -4   36.80    7.30
  -1   1  -4   33.40    4.40
   3  -1   4  141.29   22.00
  -3  -1  -4  170.48   13.70
   3   1   4  147.89   14.60
  -3   1  -4  169.58   11.40
  -3   1  -4  154.78   16.40
   5  -1   4 1054.29  107.69
  -5  -1  -4 1056.39   64.69
  -5   1  -4 1047.80   62.49
  -5   1  -4 1025.20   89.19
  -7  -1  -4   15.60    6.10
  -7  -1  -4   17.20    5.60
  -7  -1  -4   15.10    6.00
   7  -1   4    5.80    8.60
   7  -1   4   20.80    4.10
   7   1   4   19.90    3.70
  -7   1  -4   17.00    6.80
  -7   1  -4   14.00    9.50
  -7   1  -4   16.60    4.10
   7   1   4    5.10   17.40
  -9  -1  -4   82.59   14.60
   9  -1   4   92.69    8.80
  -9  -1  -4   94.19   12.50
   9  -1   4   74.69   17.30
  -9  -1  -4   96.89   12.60
  -9   1  -4   68.39   16.60
  -9   1  -4   88.69   14.00
   9   1   4   99.29    8.10
   9   1   4  154.38   25.20
   9   1   4   82.69    7.70
  11  -1   4  357.46   41.50
 -11  -1  -4  346.17   33.60
 -11  -1  -4  285.47   37.40
 -11  -1  -4  314.37   26.30
  11  -1   4  337.67   23.60
  11   1   4  342.17   22.90
  11   1   4  289.37   21.90
  13  -1   4  265.77   19.10
 -13  -1  -4  243.58   31.20
 -13  -1  -4  278.67   23.50
  13  -1   4  258.67   17.30
  13   1   4  227.88   16.70
 -13   1  -4  178.68   36.90
  13   1   4  258.37   18.20
  13   1   4  215.68   17.20
 -15  -1  -4  285.67   32.90
  15  -1   4  240.68   18.80
  15  -1   4  254.17   17.20
 -15   1  -4  221.78   41.10
 -15   1  -4  205.98   35.60
  15   1   4  236.98   16.60
  15   1   4  244.58   18.10
  15   1   4  197.88   17.00
  17  -1   4   86.19    9.90
  17  -1   4  101.19    8.20
 -17  -1  -4   99.09   19.50
 -17   1  -4   61.39   21.60
  17   1   4   87.59    7.60
 -17   1  -4   57.99   16.60
  19  -1   4   62.69    8.30
  19  -1   4   66.89    6.60
 -19   1  -4   47.20   16.20
  19   1   4   78.39    6.30
  19   1   4   44.10    8.50
 -19   1  -4   38.80   12.70
  21  -1   4  102.19    8.30
  21   1   4  100.59    8.40
  23  -1   4    0.20    1.90
  24  -2  -4   19.70    3.20
  24   2  -4   17.00    3.40
  22  -2  -4   81.39    9.10
  22  -2  -4   57.69   25.30
  22  -2  -4   97.69    7.70
  22   2  -4   80.09    7.40
  20  -2  -4   79.19    7.20
  20  -2  -4   77.89   24.50
 -20  -2   4   76.19   19.00
  20  -2  -4   74.49    8.90
  20   2  -4   82.69    9.20
  20   2  -4   65.09    7.90
  20   2  -4   80.39    7.40
  18  -2  -4   55.19    5.90
 -18  -2   4   65.09   18.00
  18  -2  -4   58.19   27.00
  18  -2  -4   58.49    7.60
  18  -2  -4   75.69   16.70
  18   2  -4   53.39    7.00
 -18   2   4   20.80   19.40
  18   2  -4   56.49    6.00
  18   2  -4   49.90    7.20
  16  -2  -4  516.15   35.40
  16  -2  -4  535.35   36.90
  16  -2  -4  486.35   62.89
 -16  -2   4  521.25   60.99
  16  -2  -4  540.55   55.59
  16   2  -4  520.75   35.50
  16   2  -4  536.65   37.20
  16   2  -4  534.45   35.40
  16   2  -4  593.64   57.89
  16   2  -4  585.24   52.79
  14  -2  -4  346.47   51.79
  14  -2  -4  398.56   27.10
 -14  -2   4  409.06   32.70
 -14  -2   4  314.27   44.90
  14  -2  -4  308.37   50.99
  14  -2  -4  431.76   40.60
  14   2  -4  386.66   26.10
 -14   2   4  398.46   42.60
  14   2  -4  436.16   39.80
  14   2  -4  377.16   27.30
 -14   2   4  439.36   45.00
  12  -2  -4  119.69   22.70
  12  -2  -4  132.79   10.90
  12  -2  -4  154.88   17.60
 -12  -2   4  111.09   21.50
 -12  -2   4   96.99   15.40
  12  -2  -4  136.29   23.90
  12   2  -4  177.18   20.00
  12   2  -4  132.69   10.90
 -12   2   4  144.79   21.60
  12   2  -4  126.79   11.30
 -12   2   4  167.28   19.40
  10  -2  -4  194.78   19.00
  10  -2  -4  183.48   24.90
 -10  -2   4  177.78   18.60
  10  -2  -4  206.18   21.40
 -10  -2   4  136.99   22.60
  10  -2  -4  142.59   26.40
  10   2  -4  164.78   13.10
 -10   2   4  167.58   22.00
  10   2  -4  174.68   12.60
  10   2  -4  156.78   23.00
   8  -2  -4 1919.31  202.58
   8  -2  -4 2213.68  187.18
   8  -2  -4 2060.59  189.48
  -8  -2   4 2092.89  122.89
  -8   2   4 2019.90  171.58
   8   2  -4 2030.00  171.58
   8   2  -4 1869.51  130.79
   8   2  -4 1958.60  125.29
   6  -2  -4 1931.51  182.78
  -6  -2   4 1928.71  117.79
   6  -2  -4 2072.49  181.28
   6  -2  -4 1985.00  195.88
   6  -2  -4 2129.69  198.48
  -6   2   4 1822.12  164.68
   6   2  -4 1897.41  120.99
   6   2  -4 1840.22  165.58
   4  -2  -4  258.17   17.00
  -4  -2   4  274.87   20.70
   4  -2  -4  297.97   35.90
   4   2  -4  278.17   29.80
  -4   2   4  270.57   27.20
  -2  -2   4  505.15   53.69
  -2  -2   4  499.65   34.10
   2  -2  -4  514.35   32.80
   2  -2  -4  584.44   59.79
  -2   2   4  539.25   47.60
   2   2  -4  526.45   49.00
   0  -2   4  645.74   65.89
   0  -2  -4  674.43   69.89
   0  -2  -4  625.74   40.30
   0  -2   4  602.94   40.00
   0   2  -4  638.14   57.69
   0   2   4  650.23   56.59
  -2  -2  -4  167.28   14.70
   2  -2   4  162.58   22.00
  -2  -2  -4  165.18   18.60
   2   2   4  158.58   18.80
  -2   2  -4  164.48   19.70
  -4  -2  -4 1569.04   91.49
  -4  -2  -4 1491.65  130.99
  -4  -2  -4 1499.55  152.08
   4  -2   4 1579.44   97.29
   4  -2   4 1494.55  150.08
   4  -2   4 1364.46  138.29
  -4   2  -4 1452.95  127.79
   4   2   4 1570.94   93.09
   4   2   4 1407.76  125.49
   6  -2   4  188.78   29.60
   6  -2   4  221.78   22.10
   6  -2   4  217.08   16.60
  -6  -2  -4  212.98   23.50
  -6  -2  -4  220.88   19.60
  -6  -2  -4  220.58   24.80
  -6  -2  -4  213.28   20.90
  -6   2  -4  198.88   25.00
   6   2   4  251.97   15.80
  -8  -2  -4  448.26   48.00
   8  -2   4  481.55   31.70
  -8  -2  -4  435.76   33.60
   8  -2   4  397.66   52.69
   8   2   4  444.66   29.50
  -8   2  -4  446.86   44.80
  10  -2   4  464.15   32.90
 -10  -2  -4  451.45   35.60
 -10  -2  -4  458.25   50.19
  10  -2   4  550.44   54.89
  10   2   4  419.26   30.60
 -12  -2  -4  372.36   38.20
  12  -2   4  347.57   23.20
 -12  -2  -4  409.86   31.70
  12  -2   4  311.57   24.60
  12   2   4  295.57   22.90
 -12   2  -4  252.07   49.30
 -14  -2  -4  122.69   18.60
  14  -2   4  133.39   10.40
  14  -2   4  114.79   12.30
  14   2   4  112.69   10.70
 -14   2  -4  103.69   23.00
 -14   2  -4  106.99   27.40
  16  -2   4    8.80    5.10
  16  -2   4    7.60    3.60
 -16  -2  -4   13.30    8.50
  16   2   4   11.40    4.00
 -16   2  -4   16.70   22.20
 -16   2  -4   39.90   18.10
  18  -2   4   53.89    7.80
  18  -2   4   67.59    6.80
 -18   2  -4   62.99   17.10
  18   2   4   61.79    7.20
  20  -2   4   64.29    5.90
 -20   2  -4   41.90   13.60
  22  -2   4   31.50    3.50
  19  -3  -4  101.09   23.40
  19   3  -4   69.19    8.10
 -17  -3   4  118.49   19.10
 -17  -3   4  104.39   17.30
  17  -3  -4  157.18   22.70
 -17   3   4   50.89   22.20
  17   3  -4  106.09   10.40
 -15  -3   4  144.09   20.50
  15  -3  -4  208.58   26.00
 -15  -3   4  164.68   22.30
  15  -3  -4   94.29   29.20
  15   3  -4  152.38   12.90
 -13  -3   4  347.67   38.60
  13  -3  -4  247.38   46.70
 -13  -3   4  321.17   35.60
  13  -3  -4  360.16   46.40
 -13  -3   4  220.58   35.60
  13  -3  -4  396.96   36.80
 -13   3   4  342.67   39.30
 -13   3   4  326.87   44.20
  13   3  -4  372.56   38.10
  13   3  -4   84.39  138.29
  13   3  -4  339.47   23.60
  11  -3  -4  176.58   18.90
 -11  -3   4  139.39   18.80
  11  -3  -4  135.09   25.60
 -11  -3   4  146.79   19.10
  11  -3  -4  131.49   26.80
 -11  -3   4  135.79   19.80
 -11   3   4  136.49   23.80
  11   3  -4  151.68   12.10
  11   3  -4   52.89  120.69
  11   3  -4  130.99   24.30
  -9  -3   4   60.79   10.10
  -9  -3   4   39.60    8.60
   9  -3  -4   89.99   15.50
   9  -3  -4   49.60   10.00
   9  -3  -4   54.19   11.50
  -9  -3   4   47.50   10.90
   9   3  -4   71.79   18.00
  -9   3   4   56.99   15.30
  -9   3   4   70.29    8.40
   9   3  -4   62.69    6.60
   7  -3  -4  408.36   40.10
  -7  -3   4  371.26   31.20
   7  -3  -4  387.96   52.09
  -7  -3   4  366.86   40.70
   7  -3  -4  413.16   42.30
   7  -3  -4  468.35   45.00
  -7   3   4  424.86   38.20
   7   3  -4  435.56   27.20
   7   3  -4  383.06   43.80
  -7   3   4  420.16   43.30
   7   3  -4  399.66   38.40
   5  -3  -4    5.50    4.40
  -5  -3   4    7.00    5.70
   5  -3  -4    3.00    3.70
  -5  -3   4    8.50    4.30
   5  -3  -4    4.30    3.20
   5  -3  -4    3.00    9.20
  -5   3   4    9.80    4.40
   5   3  -4    1.70   11.60
   5   3  -4    9.00    2.70
   5   3  -4    6.90    5.50
  -5   3   4    4.10    7.20
  -3  -3   4    5.50    5.20
   3  -3  -4    1.70    8.90
   3  -3  -4    0.80    3.20
   3  -3  -4    3.70    3.00
  -3  -3   4    9.60    4.00
   3  -3  -4    4.40    3.40
  -3   3   4    3.70    8.00
   3   3  -4    3.00    5.70
   3   3  -4    0.30   10.40
   3   3  -4    5.30    2.20
  -3   3   4    1.30    3.80
  -1  -3   4  373.16   27.20
  -1  -3   4  378.96   38.30
   1  -3  -4  344.77   38.10
   1  -3  -4  403.86   49.99
   1  -3  -4  387.66   37.60
   1  -3  -4  418.26   41.60
  -1   3   4  393.96   40.00
  -1   3   4  406.36   36.20
   1   3  -4  401.06   36.50
   1   3  -4  361.76   41.00
  -1  -3  -4  109.29   14.20
  -1  -3  -4  119.99   13.20
   1  -3   4   97.59   13.30
  -1  -3  -4  104.69   12.70
  -1  -3  -4  136.89   21.20
  -1  -3  -4  113.49   12.70
   1  -3   4  102.09    9.20
  -1   3  -4  103.49   14.40
  -1   3  -4  104.29   19.90
   1   3   4  116.99   12.80
   1   3   4  118.19    8.80
   1   3   4  104.99   19.10
   3  -3   4  465.75   46.60
   3  -3   4  577.24   54.29
  -3  -3  -4  524.15   35.00
   3  -3   4  491.35   33.10
  -3  -3  -4  486.45   51.19
   3   3   4  473.65   31.20
   3   3   4  464.45   44.20
   3   3   4  360.56   54.89
  -3   3  -4  481.05   49.40
  -3   3  -4  462.75   44.80
  -5  -3  -4  175.08   20.30
   5  -3   4  137.89   13.50
   5  -3   4  166.38   18.40
  -5  -3  -4  183.48   18.70
  -5   3  -4  143.69   19.00
   5   3   4  160.48   17.30
   5   3   4  199.48   13.10
  -5   3  -4  175.98   24.70
   7  -3   4   27.30    6.00
   7  -3   4   28.00    5.60
  -7  -3  -4   21.70    6.10
  -7  -3  -4   27.70    9.90
  -7   3  -4   18.90    8.10
   7   3   4   36.40    5.40
  -7   3  -4   25.00   13.10
  -7   3  -4   12.00   13.30
   7   3   4  111.49  139.29
   7   3   4   32.10    8.60
   9  -3   4  128.59   12.70
   9  -3   4  127.09   10.80
  -9  -3  -4  127.19   16.80
  -9  -3  -4  113.09   17.40
   9   3   4  124.69   11.10
  -9   3  -4  131.99   25.40
   9   3   4  109.19  130.59
 -11  -3  -4   66.19   12.50
  11  -3   4   61.69    7.40
  11  -3   4   76.09    9.40
  11   3   4   82.19    8.50
  11   3   4   16.30  109.69
 -11   3  -4   37.50   22.80
 -11   3  -4   48.20   18.40
  13  -3   4  127.49   10.60
 -13  -3  -4  149.79   18.30
  13  -3   4   94.39   12.00
  13   3   4  125.39   11.10
 -13   3  -4   83.89   26.70
 -13   3  -4  107.79   24.60
  15  -3   4   19.80    5.70
  15  -3   4   22.30    4.40
 -15  -3  -4   30.00    9.40
  15   3   4   23.70    5.10
 -15   3  -4    7.90   20.10
 -15   3  -4   55.39   20.40
  17  -3   4    7.10    4.20
  17   3   4    8.70    3.90
 -17   3  -4   39.40   16.60
  19  -3   4   55.09    5.30
 -19   3  -4   38.40   13.20
 -20   4   4    4.00   14.20
  18  -4  -4   51.39   19.10
 -18   4   4    4.60   15.90
 -18   4   4   24.20   16.70
  18   4  -4   30.60    5.10
 -16  -4   4    0.20    5.40
  16  -4  -4    6.90   15.00
 -16   4   4   -2.70   15.70
  16   4  -4  -64.59  110.19
  16   4  -4    4.60    3.80
 -14  -4   4  262.17   31.10
  14  -4  -4  349.57   37.50
  14   4  -4  280.97   21.00
  14   4  -4   -2.60  145.79
  12  -4  -4   51.39   10.80
  12  -4  -4   31.10   17.70
 -12  -4   4   30.30    8.20
  12   4  -4   38.10    6.00
  12   4  -4   20.20  140.99
 -12   4   4   29.40   14.40
  10  -4  -4  122.89   17.40
 -10  -4   4  102.89   16.20
  10  -4  -4   78.79   18.70
  10  -4  -4  153.88   24.30
  10   4  -4   49.40  145.39
 -10   4   4  117.89   19.30
  10   4  -4  105.69   10.00
   8  -4  -4  210.28   22.60
   8  -4  -4  196.38   27.10
  -8  -4   4  181.78   22.50
   8  -4  -4  198.68   26.00
   8  -4  -4  191.28   29.80
  -8  -4   4  133.29   20.40
   8   4  -4   27.40  128.39
  -8   4   4  200.18   21.00
   8   4  -4  187.18   14.50
  -6  -4   4    9.90    5.50
  -6  -4   4    8.20    8.00
   6  -4  -4    6.90    8.30
   6  -4  -4    9.90    6.30
   6  -4  -4   28.00   10.10
  -6   4   4   -2.80   10.60
   6   4  -4  -54.19  128.99
  -6   4   4   14.50    6.40
   6   4  -4   -5.60   14.90
   6   4  -4   10.40    7.80
   4   4  -4  -56.79  102.09
  -2  -4   4  145.39   18.20
   2  -4  -4  155.78   17.60
   2  -4  -4  161.18   19.00
   2  -4  -4  154.48   18.30
  -2   4   4  174.18   17.60
   2   4  -4  104.09   26.30
  -2   4   4    0.80  111.69
   2   4  -4  -18.70  108.59
   2   4  -4  115.39   17.70
   0  -4   4    2.60    4.70
   0  -4  -4    5.40    4.00
   0  -4  -4    2.00    4.10
   0   4  -4   -7.00    7.30
   0   4  -4  -20.70   13.80
   0   4   4   12.80  115.99
   0   4   4   -1.00    4.90
   0   4  -4  -11.40  102.49
  -2  -4  -4   59.79   10.30
   2  -4   4   57.39    9.60
   2   4   4   41.40  121.99
   2   4   4   56.49   10.10
  -2   4  -4   46.90   11.30
  -2   4  -4   24.90   19.20
  -4  -4  -4  522.95   57.49
   4  -4   4  586.14   53.09
   4   4   4  512.75   49.90
  -4   4  -4  538.15   73.09
   4   4   4  117.89  135.09
   4   4   4  539.95   35.10
   6  -4   4  304.07   29.30
  -6  -4  -4  255.67   30.80
   6   4   4  284.97   19.20
   6   4   4  221.98   26.20
   6   4   4   91.79  154.58
  -8  -4  -4    5.50    5.70
   8  -4   4   11.00    6.40
   8   4   4    8.40    4.20
  -8   4  -4   15.20   16.00
  -8   4  -4   13.80   13.80
   8   4   4  -52.59  128.29
 -10  -4  -4  231.28   28.70
  10   4   4  244.98   18.00
  10   4   4  149.29  139.19
 -12  -4  -4   52.29   10.40
 -12   4  -4   28.80   17.30
  12   4   4   -2.40  108.29
 -12   4  -4    5.60   19.20
  12   4   4   35.10    6.00
  14   4   4   37.30   99.19
  14   4   4   27.30    5.20
 -14   4  -4   58.29   19.80
 -16   4  -4   69.19   17.80
 -18   4  -4   34.80   10.20
 -19   5   4  -16.00   13.10
  17   5  -4   36.80   78.49
 -17   5   4   12.00   13.20
  15   5  -4  -60.49  103.99
 -15   5   4   13.10   17.20
  13  -5  -4   31.10   18.10
  13  -5  -4   25.40   14.00
 -13   5   4   19.80   14.10
  13   5  -4   16.40  129.79
 -11  -5   4   25.80    7.40
  11  -5  -4   38.40   20.70
  11  -5  -4   47.70   12.80
 -11   5   4   34.10   12.60
  11   5  -4  -60.39  129.99
  11   5  -4   22.00    5.10
  -9  -5   4  138.29   18.20
   9  -5  -4   87.69   24.40
   9   5  -4   30.40  159.58
   9   5  -4  124.89   11.10
  -9   5   4  152.58   17.10
   7  -5  -4   21.40    7.60
   7  -5  -4    3.10   17.30
  -7  -5   4   17.40    7.00
   7   5  -4  -92.19  138.59
  -7   5   4   23.80    8.60
   7   5  -4   18.60    9.50
   5  -5  -4   18.70    6.70
  -5  -5   4    7.10    6.20
  -5   5   4    6.80    7.50
   5   5  -4  -37.50  120.39
   5   5  -4    9.00    9.60
  -3   5   4  203.68   22.20
   3   5  -4  173.28   23.50
   3   5  -4   94.99  154.38
   1  -5  -4    8.00    4.90
   1  -5  -4   13.60    5.20
  -1  -5   4   -1.20    5.80
  -1   5   4   81.49  129.19
   1   5  -4  -11.50  137.09
  -1   5   4   -4.80    6.20
   1   5  -4    0.60    9.60
   1  -5   4   22.50    7.60
   1   5   4   49.50  143.79
  -1   5  -4    4.20   10.20
   1   5   4   14.60    7.60
  -3   5  -4   20.40   10.90
   3   5   4   35.60    8.60
   3   5   4  -85.59  123.19
  -5  -5  -4  306.37   33.00
   5   5   4  266.87   28.60
   5   5   4  -13.70  138.49
  -7  -5  -4  402.36   48.20
   7  -5   4  518.25   46.80
   7   5   4  109.19  159.18
   9   5   4   67.39    7.80
   9   5   4  -23.90  123.39
 -11   5  -4  -11.60   16.00
  11   5   4  -50.29   99.69
  13   5   4  -11.80   75.39
 -13   5  -4  -10.80   15.30
 -12   6   4   15.90   17.20
  12   6  -4   24.90  101.19
  10   6  -4   26.10  127.69
   8   6  -4    0.50  121.29
   6   6  -4  -73.99  108.49
   4   6  -4    7.90    9.50
  -4   6   4   36.60    8.60
   4   6  -4  -20.80  121.89
   2   6  -4    8.90    9.10
  -2   6   4   31.10    8.20
   2   6  -4  -11.40  115.59
   0   6   4   29.80  116.89
   0   6  -4   14.70    9.60
   0   6   4   32.10    8.30
  -2   6  -4    6.50   12.40
   2   6   4   11.90  118.19
   4   6   4    8.10  120.69
   6   6   4  -15.30  104.49
   8   6   4   16.50   94.39
  10   6   4   13.80   69.79
  26   0  -5    6.80    2.40
 -24   0   5  -32.20   21.10
 -22   0   5   -1.00   24.70
 -20   0   5   58.89   24.40
  20   0  -5   35.40    4.70
  20   0  -5   10.60   17.00
  20   0  -5   33.70    6.00
 -18   0   5   36.70   19.60
  18   0  -5   20.00   12.10
  18   0  -5    5.60    3.60
  16   0  -5  640.64   68.39
  16   0  -5  747.03   46.70
  16   0  -5  732.13   45.10
  16   0  -5  595.24   63.09
  14   0  -5  160.28   32.50
  14   0  -5  228.38   16.80
  14   0  -5  217.38   25.50
  14   0  -5  288.27   27.80
  12   0  -5   30.60    7.80
  12   0  -5   23.90    8.10
  12   0  -5   15.00    7.10
 -12   0   5   21.10    5.60
  12   0  -5   29.80   13.70
  12   0  -5   19.70    3.50
  10   0  -5  275.37   27.30
  10   0  -5  302.87   19.90
 -10   0   5  312.87   20.40
  10   0  -5  242.08   28.70
  10   0  -5  267.47   32.40
   8   0  -5  368.56   32.10
   8   0  -5  343.07   37.70
  -8   0   5  323.87   23.00
   6   0  -5  976.90   77.39
   6   0  -5  851.41   90.99
   4   0  -5 1655.43   98.69
   4   0  -5 1799.72  139.29
   4   0  -5 1595.24  164.48
   2   0  -5  143.29   10.50
   2   0  -5  152.78   13.60
   0   0  -5  679.83   60.59
   0   0  -5  812.22   44.70
  -2   0  -5   70.79    6.60
  -2   0  -5   76.39    8.10
  -4   0  -5 2071.09  119.09
  -4   0  -5 1960.10  165.48
  -6   0  -5  765.12   72.09
   6   0   5  713.33   82.99
   8   0   5  163.58   30.90
  -8   0  -5  171.48   24.60
   8   0   5  206.88   13.90
  -8   0  -5  187.78   16.50
   8   0   5  214.38   14.90
 -10   0  -5   45.30    8.40
  10   0   5   53.59    6.70
  10   0   5   48.70    5.80
 -10   0  -5   47.10   12.10
 -14   0  -5    0.80   11.90
  14   0   5   28.50    5.50
 -14   0  -5   22.70   12.20
 -14   0  -5   14.30   10.80
  14   0   5   23.80    3.80
 -16   0  -5  128.29   23.50
  16   0   5  163.18   13.50
 -16   0  -5  125.99   22.20
 -16   0  -5  153.18   26.50
  16   0   5  149.19   11.30
  18   0   5  151.38   13.80
  18   0   5  169.08   12.30
  20   0   5  176.18   12.80
  22   0   5    4.40    2.60
  27  -1  -5   25.30    4.10
  25  -1  -5   34.00    4.50
  25   1  -5   34.90    4.60
 -23  -1   5    3.00   20.10
  23  -1  -5   32.40    4.20
  23  -1  -5   32.70    5.80
 -23   1   5    4.60   25.30
  23   1  -5   30.00    4.40
  23   1  -5   36.60    6.30
  21  -1  -5   75.49    7.30
  21  -1  -5   73.99    9.20
  21  -1  -5   93.09   25.80
 -21  -1   5   90.89   23.90
 -21   1   5   55.99   27.20
  21   1  -5   76.89    7.60
  21   1  -5   76.99    9.50
  19  -1  -5   38.20    6.30
  19  -1  -5   23.70   22.50
  19  -1  -5   30.90    4.40
  19  -1  -5   45.40   15.90
 -19  -1   5   38.30   19.40
  19   1  -5   75.89   17.40
  19   1  -5   33.60    6.40
  19   1  -5   40.70    5.30
  17  -1  -5  167.28   13.80
 -17  -1   5  122.09   26.50
  17  -1  -5  221.48   27.30
  17  -1  -5  119.69   30.30
  17  -1  -5  177.78   12.40
  17   1  -5  216.18   28.20
  17   1  -5  177.68   22.10
  17   1  -5  165.08   13.70
 -17   1   5  212.28   27.90
  17   1  -5  142.49   12.30
  17   1  -5  180.88   14.30
  15  -1  -5  128.89   10.40
 -15  -1   5   99.09   14.80
 -15  -1   5   76.79   20.00
  15   1  -5  149.09   21.90
 -15   1   5  116.59   19.30
 -15   1   5  160.68   21.90
  15   1  -5  114.29   10.60
  15   1  -5  119.19    9.80
  15   1  -5  135.19   18.00
 -13  -1   5  264.37   22.20
  13  -1  -5  262.87   27.90
  13  -1  -5  332.37   35.10
  13  -1  -5  225.88   18.00
  13  -1  -5  198.28   36.50
  13   1  -5  223.78   18.30
 -13   1   5  258.17   29.90
  13   1  -5  268.17   27.10
  13   1  -5  315.27   30.60
  13   1  -5  245.28   17.40
  11  -1  -5  249.88   18.70
  11  -1  -5  282.67   35.80
  11  -1  -5  202.78   34.40
  11  -1  -5  266.27   29.00
 -11  -1   5  277.87   22.20
  11  -1  -5  224.18   27.70
  11   1  -5  273.57   19.00
 -11   1   5  350.26   31.80
  11   1  -5  303.77   28.00
  11   1  -5  282.67   18.20
  11   1  -5  312.97   31.10
  -9  -1   5 2089.79  131.09
   9  -1  -5 2372.86  223.38
   9  -1  -5 1981.30  216.38
   9  -1  -5 2343.17  203.38
   9   1  -5 2445.86  183.88
   9   1  -5 1913.91  141.69
   7  -1  -5 2086.19  203.68
  -7  -1   5 2012.60  122.89
  -7   1   5 2365.16  173.28
  -7   1   5 1837.12  120.09
   7   1  -5 2040.80  172.38
   5  -1  -5  912.91   95.79
   5  -1  -5  955.10   55.29
  -5  -1   5  973.00   57.89
   5   1  -5  894.71   80.49
  -5   1   5  951.40   79.79
   3  -1  -5   12.40    6.50
   3  -1  -5   16.60    3.20
  -3  -1   5    6.00    4.70
  -3   1   5   14.70    4.10
   3   1  -5   18.00    7.80
   1  -1  -5 1789.22  178.18
  -1  -1   5 1685.83  175.48
   1  -1  -5 1776.32  105.79
  -1   1   5 1762.32  148.49
   1   1  -5 1836.02  150.18
   1   1  -5 1955.50  105.99
   1  -1   5  597.04   65.99
  -1  -1  -5  629.84   39.70
  -1   1  -5  637.74   54.79
  -1   1  -5  657.23   38.60
  -3  -1  -5 1218.48   72.99
   3  -1   5 1259.87  121.69
  -3   1  -5 1192.58   71.09
  -3   1  -5 1124.59  100.69
   5  -1   5 1162.58   71.49
  -5  -1  -5 1108.79   67.59
   5  -1   5 1045.80  112.69
  -5  -1  -5 1006.50  112.29
  -5   1  -5 1099.59   65.39
   5   1   5 1137.29   68.19
  -5   1  -5 1047.20   92.69
  -7  -1  -5  877.21   95.29
   7  -1   5  944.61   61.39
   7  -1   5  887.11   98.79
  -7  -1  -5  911.21   58.89
  -7  -1  -5 1073.19   87.79
   7   1   5  957.50   58.39
   7   1   5  850.91   60.39
  -7   1  -5  863.51   79.99
  -7   1  -5  923.11   56.49
   9  -1   5  143.39   21.10
  -9  -1  -5  131.29   15.70
   9  -1   5  123.79   11.00
  -9  -1  -5  111.69   17.40
  -9  -1  -5  119.09   14.50
   9   1   5  173.08   26.90
   9   1   5  116.69    9.90
   9   1   5  104.29    9.80
  11  -1   5  114.39    9.00
 -11  -1  -5   98.29   17.50
 -11  -1  -5  108.59   14.30
  11  -1   5  118.19   10.70
 -11  -1  -5  113.99   14.50
 -11   1  -5   88.29   20.00
  11   1   5   94.39    9.10
  11   1   5  103.29    9.20
 -13  -1  -5   94.49   18.60
 -13  -1  -5  111.29   15.60
  13  -1   5  114.59    8.80
  13  -1   5  104.29   10.70
 -13   1  -5   81.09   22.00
  13   1   5   96.79    9.30
  13   1   5   88.29    8.80
 -13   1  -5   79.89   18.50
  13   1   5   93.89    7.90
  15  -1   5   56.19    8.20
 -15  -1  -5   77.59   15.00
  15  -1   5   63.99    6.90
  15   1   5   54.29    7.40
  15   1   5   54.29    7.00
 -15   1  -5   46.60   16.20
  15   1   5   54.09    5.80
 -15   1  -5   51.49   20.80
  17  -1   5  147.59   13.80
  17  -1   5  162.98   11.80
 -17   1  -5  140.59   25.40
  17   1   5  127.79   12.90
 -17   1  -5  139.09   25.50
  17   1   5  159.58   11.30
  19  -1   5  358.16   24.00
  19  -1   5  320.97   25.40
  19   1   5  372.06   23.80
 -19   1  -5  301.07   39.30
 -19   1  -5  408.76   39.50
  21  -1   5   17.80    3.20
  24  -2  -5   14.80    3.00
  24   2  -5   10.70    3.00
  22  -2  -5   -3.90   22.70
 -22  -2   5   68.29   15.40
  22  -2  -5   59.99    5.70
  22  -2  -5   44.20    6.50
  22   2  -5   56.79    5.90
  22   2  -5   39.00    6.20
 -22   2   5   17.10   22.90
  20  -2  -5  217.58   17.40
  20  -2  -5  302.07   40.00
 -20  -2   5  243.38   34.00
  20  -2  -5  214.28   15.80
  20   2  -5  187.78   16.10
  20   2  -5  228.38   16.10
  20   2  -5  225.28   17.80
  18  -2  -5  491.45   49.60
 -18  -2   5  412.86   51.19
  18  -2  -5  420.36   28.30
  18  -2  -5  429.46   29.90
  18  -2  -5  304.47   58.79
  18   2  -5  400.86   28.50
  18   2  -5  418.36   28.40
  18   2  -5  447.96   30.50
  16  -2  -5   97.39    9.20
  16  -2  -5   74.99   24.90
  16  -2  -5   55.49   22.20
  16  -2  -5  151.68   22.80
 -16  -2   5   85.69   16.90
 -16  -2   5   81.89   18.50
  16   2  -5   93.09    7.80
 -16   2   5   68.19   17.00
  16   2  -5   90.89    9.50
  16   2  -5   92.79    9.00
  14  -2  -5  820.52   78.89
  14  -2  -5  661.83   84.49
 -14  -2   5  602.74   48.90
  14  -2  -5  691.63   46.50
  14   2  -5  752.62   64.99
  14   2  -5  677.33   44.80
  14   2  -5  630.64   46.80
 -14   2   5  742.23   69.49
  12  -2  -5  106.79   14.60
  12  -2  -5  127.99   21.00
  12  -2  -5   91.89   18.70
 -12  -2   5   85.99   14.00
  12   2  -5  109.19   18.70
  12   2  -5   88.39    8.80
 -12   2   5  110.79   20.70
  12   2  -5   87.99    8.40
  10  -2  -5   69.99   17.70
  10  -2  -5   77.99   16.70
  10  -2  -5   95.09   11.80
  10  -2  -5   85.49   14.10
 -10  -2   5   95.39   14.00
 -10   2   5   78.79   15.50
  10   2  -5   93.49   18.00
  10   2  -5   86.19    7.40
  10   2  -5   81.29    8.00
   8  -2  -5  261.67   28.40
   8  -2  -5  239.48   25.90
  -8  -2   5  242.78   21.30
   8  -2  -5  241.68   34.30
   8  -2  -5  275.77   24.90
   8   2  -5  240.28   16.80
  -8   2   5  263.67   27.60
   8   2  -5  228.68   28.40
   8   2  -5  224.18   17.50
  -6  -2   5  656.13   45.20
   6  -2  -5  741.33   65.49
   6  -2  -5  697.43   71.59
   6  -2  -5  759.42   77.19
   6  -2  -5  662.23   66.09
   6   2  -5  707.03   64.19
   6   2  -5  675.63   43.70
  -6   2   5  646.14   61.79
  -4  -2   5   50.69    8.30
   4  -2  -5   38.20    4.70
   4  -2  -5   37.40   11.90
   4  -2  -5   48.20    9.40
   4   2  -5   51.59   13.10
  -4   2   5   48.20    9.80
  -2  -2   5   87.69   10.80
   2  -2  -5   95.19   19.30
   2  -2  -5   85.29    8.90
   2   2  -5  112.79   16.50
  -2   2   5  101.19   13.10
   0  -2  -5  456.25   41.20
   0  -2   5  424.86   30.00
   0  -2   5  446.06   48.60
   0  -2  -5  476.05   47.60
   0  -2  -5  473.85   30.40
   0  -2  -5  424.06   52.69
   0   2  -5  472.15   43.40
   0   2  -5  416.56   41.40
   0   2   5  498.05   42.00
  -2  -2  -5  611.74   61.09
   2  -2   5  521.45   62.19
  -2  -2  -5  584.14   52.49
   2  -2   5  613.44   39.30
  -2  -2  -5  610.44   38.90
   2   2   5  638.24   37.60
   2   2   5  500.95   51.59
  -2   2  -5  585.54   54.09
  -4  -2  -5 4186.08  382.76
   4  -2   5 3863.61  400.96
  -4  -2  -5 4152.98  416.86
  -4  -2  -5 4169.68  359.46
  -4  -2  -5 4234.18  243.18
   4  -2   5 4412.26  266.07
   4  -2   5 3962.00  380.06
  -4   2  -5 4105.79  342.57
   4   2   5 4019.70  254.47
  -6  -2  -5   26.60    5.00
   6  -2   5   21.50    4.80
  -6  -2  -5   24.00    4.70
  -6  -2  -5   25.20    7.90
   6  -2   5   35.40    6.40
   6  -2   5   21.80    9.90
  -6  -2  -5   17.10    5.20
  -6   2  -5    7.80   12.30
  -6   2  -5   40.70   11.40
   6   2   5    5.90   19.40
   6   2   5   23.50    4.30
  -6   2  -5   13.60    6.40
  -8  -2  -5   69.69   11.40
  -8  -2  -5   94.39   13.50
   8  -2   5   69.59    8.70
  -8   2  -5   82.29   15.90
   8   2   5   70.39    7.40
  -8   2  -5   31.30   16.20
  10  -2   5  613.64   65.79
  10  -2   5  624.94   38.60
  10  -2   5  478.65   39.60
 -10  -2  -5  573.94   61.19
 -10  -2  -5  566.14   42.50
  10   2   5  584.24   37.80
  12  -2   5  534.75   40.90
 -12  -2  -5  659.43   63.49
  12  -2   5  577.84   39.30
  12   2   5  565.14   38.50
  14  -2   5   85.89    8.10
  14  -2   5   72.79   10.00
 -14  -2  -5   82.59   15.50
 -14   2  -5   86.69   21.10
  14   2   5   71.69    8.60
 -14   2  -5   67.09   24.80
  16  -2   5   79.69    7.60
  16  -2   5   62.79    8.80
 -16  -2  -5   63.39   13.10
 -16   2  -5   34.20   22.20
  16   2   5   67.29    7.80
 -16   2  -5   71.59   18.50
  18  -2   5  181.68   13.00
  18  -2   5  163.68   14.60
 -18   2  -5  177.48   28.40
  18   2   5  157.78   13.10
  20  -2   5   -0.80    2.30
 -20   2  -5   -4.50    9.20
  21  -3  -5  121.39   26.10
  21   3  -5   91.89    8.70
  19  -3  -5   76.09   20.30
 -19  -3   5   51.79   10.70
 -19   3   5   15.20   15.40
  19   3  -5   50.19    6.60
 -19   3   5   22.70   19.10
 -17  -3   5  200.68   24.50
 -17  -3   5  187.08   23.70
  17  -3  -5  189.28   32.60
  17   3  -5  185.18   14.80
 -17   3   5  131.79   28.00
  15  -3  -5  122.69   30.60
 -15  -3   5  187.48   23.60
 -15  -3   5  177.18   24.10
  15  -3  -5  243.18   27.50
  15   3  -5  192.68   14.70
  15   3  -5  187.18   16.50
 -15   3   5  160.28   25.90
  13  -3  -5   30.00   17.20
 -13  -3   5   34.50    9.00
  13  -3  -5   57.19   10.40
  13  -3  -5   70.09   20.10
 -13  -3   5   29.70   14.20
 -13  -3   5   47.60    9.70
 -13   3   5   32.40   13.80
  13   3  -5   -8.70  125.49
  13   3  -5   44.50    6.40
 -13   3   5   38.70   11.60
  13   3  -5   78.09   17.50
  13   3  -5   51.69    6.70
 -11  -3   5    5.70    8.20
  11  -3  -5   12.80    6.00
  11  -3  -5   10.30   10.70
  11  -3  -5   22.40   12.20
 -11  -3   5   10.00    6.00
  11   3  -5    9.20    3.80
  11   3  -5    6.80   12.70
  11   3  -5   18.70    4.10
 -11   3   5   12.80    9.80
  11   3  -5  -72.59   98.99
   9  -3  -5  350.16   36.80
   9  -3  -5  362.26   34.40
  -9  -3   5  297.87   28.30
   9  -3  -5  369.06   39.00
  -9  -3   5  317.07   35.10
   9  -3  -5  373.26   44.90
  -9   3   5  339.97   32.20
  -9   3   5  364.36   39.20
   9   3  -5  331.57   23.10
   9   3  -5  313.17   38.50
   9   3  -5  330.77   24.30
  -7  -3   5  361.46   28.80
   7  -3  -5  359.96   48.40
   7  -3  -5  364.66   35.30
   7  -3  -5  393.26   39.60
  -7  -3   5  331.27   36.00
   7  -3  -5  383.46   37.20
   7   3  -5  363.96   25.10
   7   3  -5  326.47   34.00
  -7   3   5  366.16   33.70
  -7   3   5  361.36   38.90
   7   3  -5  329.67   39.70
   7   3  -5  341.47   23.70
  -5  -3   5  478.15   35.10
  -5  -3   5  451.65   47.90
   5  -3  -5  536.15   62.49
   5  -3  -5  512.95   48.70
   5  -3  -5  524.05   52.29
   5  -3  -5  497.45   47.20
  -5   3   5  514.35   45.40
   5   3  -5  499.05   33.30
   5   3  -5  422.76   49.99
  -5   3   5  495.25   48.60
   5   3  -5  482.25   45.50
   5   3  -5  477.75   31.70
  -3  -3   5  112.89   14.40
   3  -3  -5  117.39   24.80
   3  -3  -5  117.39   13.90
   3  -3  -5  110.19   13.00
  -3  -3   5  107.39   13.10
   3  -3  -5  120.49   14.80
   3   3  -5  123.59    9.60
   3   3  -5   80.69   18.60
   3   3  -5  113.19    8.80
  -3   3   5  131.49   18.80
   3   3  -5  113.59   14.40
  -3   3   5  118.89   13.20
   1  -3  -5  924.31   91.49
  -1  -3   5  965.00   92.29
   1  -3  -5  955.20  106.79
  -1  -3   5  914.41   61.09
   1  -3  -5 1042.50  100.99
   1  -3  -5 1031.30   92.99
   1   3  -5  946.01   88.99
  -1   3   5 1016.50   87.99
  -1   3   5 1000.60   87.39
   1   3  -5  963.30   87.49
  -1  -3  -5  871.31   83.19
  -1  -3  -5  975.40   56.79
   1  -3   5 1053.99   95.69
  -1  -3  -5  894.81   90.69
   1  -3   5  849.22   57.99
   1  -3   5  861.51   82.79
   1   3   5  871.81   78.49
   1   3   5  881.41   55.29
  -1   3  -5  842.62   80.79
  -1   3  -5  830.32   78.59
   1   3   5  723.43   81.49
   3  -3   5  534.45   36.80
   3  -3   5  651.83   59.79
   3  -3   5  497.05   51.69
  -3  -3  -5  572.54   38.60
  -3  -3  -5  562.04   57.19
  -3   3  -5  527.95   54.29
  -3   3  -5  444.76   49.80
   3   3   5  521.35   49.20
   3   3   5  577.64   35.10
   5  -3   5   36.10    6.30
  -5  -3  -5   39.40    7.80
   5  -3   5   37.60    6.70
  -5  -3  -5   47.50   10.50
  -5   3  -5   47.10   16.00
   5   3   5   52.39    6.30
   5   3   5   40.70    7.40
  -5   3  -5   28.10    9.10
  -5   3  -5   17.00   12.80
  -7  -3  -5  101.39   15.60
   7  -3   5   95.99   11.50
   7  -3   5  141.99   15.50
  -7  -3  -5  120.29   15.70
  -7   3  -5  109.49   23.20
   7   3   5  230.88  151.38
   7   3   5  127.49   10.40
  -7   3  -5   91.69   16.00
   9  -3   5   48.90    6.30
  -9  -3  -5   58.99   10.30
   9  -3   5   60.39    8.70
   9   3   5   59.39    7.40
   9   3   5  -15.30  109.49
  -9   3  -5   36.40   19.50
  -9   3  -5   35.60   15.70
 -11  -3  -5  250.87   27.70
  11  -3   5  200.08   18.70
  11  -3   5  217.18   17.00
  11   3   5  199.78  146.19
  11   3   5  235.98   17.20
  13  -3   5   67.99    7.60
 -13  -3  -5   80.89   13.20
  13  -3   5   57.59    8.70
  13   3   5   63.69    8.10
 -13   3  -5   82.59   21.80
 -13   3  -5   34.20   23.00
  15  -3   5   76.19    7.60
 -15  -3  -5   74.49   12.90
  15  -3   5   74.39    9.30
 -15   3  -5  105.29   21.20
  15   3   5   79.39    8.20
 -15   3  -5   22.10   21.00
 -17   3  -5   31.50   15.00
  19  -3   5   27.60    3.40
 -19   3  -5   17.60    9.10
 -20   4   5    1.80   14.40
  18  -4  -5   68.09   19.50
  18   4  -5   49.99    6.60
 -18   4   5   11.60   15.60
  16  -4  -5   55.69   17.40
 -16  -4   5   36.10    8.70
  16  -4  -5   -0.80   21.30
  16   4  -5 -102.19  100.39
 -16   4   5   18.30   15.40
  16   4  -5   34.10    6.00
  14  -4  -5  187.78   27.70
  14  -4  -5   99.29   26.10
 -14  -4   5  142.89   19.00
  14   4  -5  -13.20  143.39
 -14   4   5   91.29   21.50
  14   4  -5  143.49   12.00
  12  -4  -5   87.39   21.30
  12  -4  -5  122.89   19.80
 -12  -4   5  101.39   16.50
  12   4  -5   98.49    9.70
  12   4  -5  -45.80  145.09
 -12   4   5  105.89   18.80
 -10  -4   5   37.10    8.80
  10  -4  -5   25.30   12.80
  10  -4  -5   38.80   18.00
  10  -4  -5   46.00    9.30
  10   4  -5  -16.20  151.98
  10   4  -5   34.00    5.70
   8  -4  -5   25.50   10.60
  -8  -4   5   24.00    7.20
   8  -4  -5   12.20    8.80
   8  -4  -5   25.20    6.90
  -8  -4   5   13.60   10.30
   8  -4  -5   20.40   11.10
   8   4  -5   22.10    4.50
  -8   4   5   29.10    7.50
   8   4  -5   21.50    8.50
   8   4  -5  -71.19  111.59
  -6  -4   5  205.38   23.90
   6  -4  -5  191.18   25.30
  -6  -4   5  139.59   20.70
   6  -4  -5  257.37   27.60
   6  -4  -5  220.98   23.20
   6  -4  -5  217.78   26.00
   6   4  -5   44.70  149.39
  -6   4   5  215.28   22.50
  -6   4   5  174.08   30.00
   6   4  -5  209.08   15.30
   4  -4  -5   81.59   11.90
  -4  -4   5   73.49   12.50
   4  -4  -5   81.69   13.20
   4  -4  -5   72.29   12.50
   4   4  -5   33.70  140.39
  -4   4   5   89.69   11.80
  -4   4   5   53.99   18.70
   4   4  -5   54.69   12.10
  -2  -4   5  224.78   25.80
   2  -4  -5  251.07   24.90
   2  -4  -5  255.57   27.60
   2  -4  -5  257.57   25.90
  -2   4   5  -21.70  105.89
   2   4  -5  183.98   25.10
   2   4  -5  -45.10  106.89
   2   4  -5  191.48   34.80
  -2   4   5  249.08   24.50
   0   4   5  -24.60  111.79
   0   4  -5    8.20   15.20
   0   4  -5  -42.30  115.49
   0   4  -5   16.90    9.50
  -2  -4  -5    3.70    4.30
   2  -4   5   -0.60    4.70
  -2   4  -5   -1.40    9.00
   2   4   5   -3.60  110.99
  -2   4  -5  -23.40   15.30
   2   4   5   -1.50    4.70
  -4  -4  -5  524.15   56.09
   4  -4   5  563.54   51.59
   4   4   5  530.75   34.30
   4   4   5  475.45   48.40
   4   4   5   60.19  140.49
   6  -4   5  374.46   34.20
  -6  -4  -5  303.87   36.20
   6   4   5   20.10  133.19
   6   4   5  271.07   30.80
   6   4   5  340.17   22.50
  -8  -4  -5    5.90    6.00
   8  -4   5   16.00    6.90
   8   4   5   -5.40  137.09
   8   4   5   10.10    4.20
  -8   4  -5    6.80   16.40
  -8   4  -5    9.40   14.00
 -10  -4  -5   55.19   11.00
  10   4   5   94.29  131.09
 -10   4  -5   22.90   15.80
 -10   4  -5   27.30   19.60
  10   4   5   57.39    7.40
  12   4   5  -15.50  112.99
 -12   4  -5   -7.90   18.10
 -14   4  -5   35.10   17.80
  14   4   5   33.20  120.69
 -16   4  -5   20.50   14.40
 -18   4  -5   -4.40    7.50
 -19   5   5    1.40   10.20
 -17   5   5    9.10   12.80
  17   5  -5  -30.20   75.29
  15   5  -5   12.40  118.39
  13  -5  -5   13.30   13.00
  13  -5  -5   46.00   20.00
 -13  -5   5   12.30    5.70
  13   5  -5  -83.29  131.39
  13   5  -5    9.00    3.90
 -13   5   5   17.30   12.60
 -11  -5   5   29.70    8.00
  11  -5  -5   33.00   11.80
  11  -5  -5   42.50   20.60
  11   5  -5   24.50    5.10
  11   5  -5  -55.59  140.09
   9  -5  -5   55.19   14.00
   9  -5  -5   34.10    9.50
   9  -5  -5   42.20   19.00
  -9  -5   5   27.40    8.00
   9   5  -5  -31.00  146.19
   9   5  -5   25.60    5.40
  -7  -5   5   76.59   13.80
   7  -5  -5   72.29   18.80
   7   5  -5   45.40   12.40
   7   5  -5  -48.20  146.09
  -7   5   5   79.79   13.50
  -5  -5   5  108.89   15.80
   5   5  -5   62.79   14.00
  -5   5   5   81.59   14.50
   5   5  -5  -36.60  145.49
   3  -5  -5  275.67   31.80
  -3  -5   5  246.98   30.30
   3  -5  -5  297.67   29.40
   3   5  -5    1.20  154.18
   1  -5  -5  139.39   17.20
  -1  -5   5  119.59   18.20
  -1   5   5   93.89   15.30
   1   5  -5    6.20  141.19
  -1   5   5   27.40  128.69
  -1  -5  -5   71.29   11.90
   1  -5   5   58.39   11.20
   1   5   5  -13.80  130.09
   1   5   5   43.50   10.40
  -3  -5  -5   98.19   14.60
   3  -5   5  119.49   17.20
   3   5   5   72.49   13.00
   3   5   5   55.19  148.99
  -5   5  -5   18.50   10.50
   5   5   5  -68.09  126.29
   7   5   5   25.40  144.79
   9  -5   5  175.88   23.00
   9   5   5   57.99  139.69
  11   5   5   68.69  111.49
  13   5   5   25.10   83.09
  12   6  -5   10.40  103.39
  10   6  -5   -4.50  115.59
   8   6  -5  -55.29  114.49
   6   6  -5  -67.99  118.49
  -4   6   5   66.59   13.90
   4   6  -5  -11.50  113.49
   4   6  -5   25.50   15.10
  -2   6   5   22.60    7.40
   2   6  -5    2.80    9.00
   0   6   5   42.30   11.60
   0   6   5  -22.70  105.79
   2   6   5   -3.60  123.59
   4   6   5  -26.40  100.79
   6   6   5   16.80   94.49
   8   6   5  -22.90   72.89
  26   0  -6  194.98   13.70
  22   0  -6   91.99   10.50
  22   0  -6  147.09   25.90
 -22   0   6   57.39   28.70
  22   0  -6   99.89    8.80
  20   0  -6   -8.50   14.80
  20   0  -6    0.70    2.50
  20   0  -6    0.70    3.80
 -20   0   6   34.50   23.00
  18   0  -6   48.10    5.40
  18   0  -6   38.90    6.20
  18   0  -6   61.59   14.20
  16   0  -6  131.99   10.80
  16   0  -6  144.79   11.80
  16   0  -6   92.89   24.00
  16   0  -6  131.89   19.40
  16   0  -6  194.48   24.10
  14   0  -6   13.30    3.40
  14   0  -6    9.40    7.10
  14   0  -6   26.90   14.90
  12   0  -6  514.15   34.10
  12   0  -6  466.65   50.19
  12   0  -6  498.95   55.09
 -12   0   6  546.75   34.30
  12   0  -6  526.05   47.30
  10   0  -6  280.67   26.40
  10   0  -6  256.97   18.30
  10   0  -6  242.68   27.80
  10   0  -6  271.17   31.40
 -10   0   6  284.87   19.60
   8   0  -6 1927.21  198.78
   8   0  -6 2147.89  169.68
  -8   0   6 2037.40  120.59
   6   0  -6 3595.44  207.88
   6   0  -6 3739.93  293.67
   6   0  -6 3372.76  344.47
   4   0  -6 1119.09  117.59
   4   0  -6 1230.08   98.09
   4   0  -6 1182.58   69.89
   2   0  -6 2819.72  166.88
   2   0  -6 2914.81  234.88
   0   0   6  104.49   22.80
   0   0  -6  167.98   11.50
  -2   0  -6  415.96   27.30
  -4   0  -6  196.38   15.70
   6   0   6  170.98   12.70
   6   0   6  193.48   13.70
  -6   0  -6  167.08   22.10
  -6   0  -6  172.38   15.20
  -8   0  -6   14.40    8.90
   8   0   6   25.60   11.60
   8   0   6   13.60    3.50
   8   0   6   12.10    3.60
  -8   0  -6    2.00    4.70
 -10   0  -6  277.77   22.80
  10   0   6  263.57   19.50
 -10   0  -6  284.27   32.70
  10   0   6  308.97   21.00
  12   0   6  167.38   12.30
  12   0   6  176.88   14.10
 -12   0  -6  177.08   23.70
 -12   0  -6  132.59   23.00
 -14   0  -6   73.69   13.90
  14   0   6   79.09    7.20
 -14   0  -6   72.59   19.20
  14   0   6   83.19    9.40
 -14   0  -6   82.49   15.20
 -16   0  -6    5.60    9.90
  16   0   6   12.10    3.40
  16   0   6   21.20    5.30
 -16   0  -6   -0.70    7.60
  18   0   6   44.60    5.30
  18   0   6   42.70    6.40
  20   0   6    7.70    2.90
  27  -1  -6   17.50    2.60
  27   1  -6   16.70    2.70
  25  -1  -6    0.20    2.30
  25   1  -6    0.10    2.40
  21  -1  -6  138.39   25.90
  21  -1  -6  108.19    9.00
 -21  -1   6   74.39   25.80
  21  -1  -6  108.09   10.80
  21   1  -6   98.89    9.20
  21   1  -6  116.39   11.50
 -21   1   6   92.59   29.00
 -19  -1   6   35.40   20.50
  19  -1  -6   36.10   24.60
  19  -1  -6   40.10    5.20
  19  -1  -6   31.40    5.90
  19  -1  -6   61.29   16.00
  19   1  -6   41.00    5.40
  19   1  -6   71.99   16.50
  19   1  -6   36.40    6.50
  17  -1  -6  199.58   14.80
  17  -1  -6  195.18   16.20
  17  -1  -6  264.87   29.20
  17   1  -6  205.58   14.90
  17   1  -6  201.78   15.50
 -17   1   6  211.88   29.70
  17   1  -6  211.88   25.70
  17   1  -6  208.88   16.80
  15  -1  -6  256.77   31.40
 -15  -1   6  246.08   23.30
  15  -1  -6  276.07   19.60
  15  -1  -6  183.98   39.90
 -15   1   6  285.87   33.90
  15   1  -6  282.27   18.60
  15   1  -6  253.87   29.00
  15   1  -6  269.77   19.90
  15   1  -6  245.18   31.90
 -15   1   6  326.07   30.40
  13  -1  -6 1078.99  118.99
  13  -1  -6 1001.60  107.59
  13  -1  -6 1127.79   74.89
 -13  -1   6 1154.08   72.99
  13   1  -6 1148.59   75.19
 -13   1   6 1126.89  102.89
  13   1  -6 1117.09  109.09
  13   1  -6 1232.28   71.79
  13   1  -6 1313.07  100.19
  11  -1  -6   23.20    6.50
  11  -1  -6   15.70    3.00
  11  -1  -6   13.10   10.90
  11  -1  -6    6.90    8.40
 -11  -1   6   18.90    6.80
  11  -1  -6   15.70    6.10
  11   1  -6   16.50    3.20
 -11   1   6   19.60    9.90
  11   1  -6   26.40    8.80
  11   1  -6   15.70    3.10
  11   1  -6   21.80    8.40
   9  -1  -6 1690.03  173.48
   9  -1  -6 2020.60  177.08
  -9  -1   6 1707.83  104.89
   9  -1  -6 1750.62  160.78
   9   1  -6 1652.93  108.49
   9   1  -6 1570.14  112.19
   9   1  -6 1530.55  161.58
   9   1  -6 1953.40  146.59
   7  -1  -6  799.82   86.19
  -7  -1   6  767.82   51.89
  -7   1   6  959.90   72.59
   7   1  -6  769.02   71.59
   5  -1  -6  801.82   48.20
   5  -1  -6  779.82   84.59
  -5   1   6  848.42   69.49
   5   1  -6  803.02   70.19
   3  -1  -6 2502.25  239.68
   3  -1  -6 2427.46  142.09
   3   1  -6 2318.17  202.08
   3   1  -6 2579.34  143.09
  -3   1   6 2358.76  200.78
   1  -1  -6 2490.95  143.89
   1   1  -6 2465.55  203.58
  -1   1   6 2331.37  201.58
   1   1  -6 2539.85  143.79
   1  -1   6   41.70   13.10
  -1  -1  -6   57.39    7.70
  -1   1  -6   70.89   10.90
  -1   1  -6   59.79    6.60
  -3  -1  -6  580.14   36.80
   3  -1   6  553.94   62.29
   3   1   6  553.44   37.40
  -3   1  -6  535.85   49.00
  -3   1  -6  561.64   34.90
   5  -1   6  241.08   17.10
  -5  -1  -6  238.08   25.90
  -5  -1  -6  254.27   23.90
   5  -1   6  201.58   32.10
  -5  -1  -6  217.88   19.00
  -5   1  -6  226.68   16.60
   5   1   6  224.28   15.90
  -5   1  -6  210.48   23.10
   7  -1   6  155.18   25.70
  -7  -1  -6  130.19   17.40
  -7  -1  -6  146.39   15.00
   7  -1   6  155.78   12.10
  -7  -1  -6  144.39   16.00
   7   1   6  127.09   10.60
   7   1   6  112.39   11.50
  -7   1  -6  148.49   12.10
  -7   1  -6  123.09   23.90
   9  -1   6  402.36   27.70
  -9  -1  -6  409.56   38.60
   9  -1   6  418.66   47.00
  -9  -1  -6  380.76   29.20
  -9  -1  -6  350.36   41.90
   9   1   6  430.46   50.99
   9   1   6  353.46   25.70
   9   1   6  361.86   26.40
 -11  -1  -6  422.26   46.60
  11  -1   6  433.26   28.70
 -11  -1  -6  495.15   42.90
  11  -1   6  438.86   30.30
 -11  -1  -6  424.66   32.50
  11   1   6  418.46   29.20
 -11   1  -6  324.27   49.30
  11   1   6  367.16   28.10
 -13  -1  -6   37.00    8.60
  13  -1   6   27.70    6.10
 -13  -1  -6   36.90   10.40
  13  -1   6   42.70    5.40
 -13   1  -6   47.70   15.70
  13   1   6   33.50    5.70
  13   1   6   44.70    6.00
 -13   1  -6   63.19   19.80
  15  -1   6   85.09    8.00
 -15  -1  -6   86.89   15.80
  15  -1   6   69.89    9.40
 -15   1  -6   72.79   16.70
  15   1   6   62.29    7.10
 -15   1  -6   86.69   20.70
  15   1   6   85.19    8.40
  19  -1   6    4.60    2.80
 -19   1  -6    0.20    8.20
  21  -1   6   35.60    4.20
  26   2  -6    2.40    2.80
  24  -2  -6   21.20    3.40
  24   2  -6   23.20    3.70
 -22  -2   6   54.19   14.60
  22  -2  -6   25.20    3.80
  22  -2  -6   20.60    4.90
  22  -2  -6  -24.70   21.80
  22   2  -6   26.60    4.10
  22   2  -6   28.20    5.60
  20  -2  -6   47.50    6.80
  20  -2  -6   48.30    5.50
 -20  -2   6   60.79   18.70
  20  -2  -6   14.00   24.40
 -20   2   6    1.00   18.40
  20   2  -6   57.19    6.20
  20   2  -6   40.80    6.00
  20   2  -6   46.30    6.80
  18  -2  -6  215.08   43.60
  18  -2  -6  288.67   19.70
  18  -2  -6  349.17   38.50
 -18  -2   6  274.07   40.40
  18  -2  -6  269.37   20.90
  18   2  -6  280.57   19.70
  18   2  -6  289.07   21.70
  18   2  -6  264.47   20.00
 -16  -2   6  158.78   30.00
  16  -2  -6  154.08   32.70
 -16  -2   6  193.98   22.90
  16  -2  -6  156.38   28.90
  16  -2  -6  194.78   15.30
  16  -2  -6  236.28   27.60
  16   2  -6  252.97   27.60
 -16   2   6  191.28   26.90
  16   2  -6  185.98   15.70
  16   2  -6  203.78   14.90
  16   2  -6  202.58   29.50
  16   2  -6  198.48   14.20
 -14  -2   6   17.10    8.80
  14  -2  -6   18.90    7.50
  14  -2  -6    6.90   14.10
  14   2  -6   16.60   10.20
  14   2  -6   39.50   10.90
 -14   2   6   16.60   10.30
  12  -2  -6  331.67   39.90
  12  -2  -6  266.97   34.70
  12  -2  -6  271.57   29.00
  12  -2  -6  277.27   30.50
 -12  -2   6  247.88   24.70
  12   2  -6  262.57   18.80
 -12   2   6  295.17   33.40
  12   2  -6  235.58   19.70
  12   2  -6  312.97   31.30
  10  -2  -6  123.49   14.20
  10  -2  -6  104.79   15.20
 -10  -2   6  113.79   15.50
  10  -2  -6  113.49   17.20
  10  -2  -6   91.89   21.30
  10   2  -6  105.89    9.50
 -10   2   6  134.59   18.80
  10   2  -6  112.69   18.90
  10   2  -6  112.39    8.90
   8  -2  -6 1124.29  106.39
  -8  -2   6 1078.29   71.19
   8  -2  -6 1285.17  104.99
   8  -2  -6 1087.79  118.79
   8   2  -6 1024.60   73.49
  -8   2   6 1139.29   98.59
   8   2  -6 1070.49   98.89
   8   2  -6 1136.19   70.29
   6  -2  -6 1465.75  139.59
   6  -2  -6 1368.06  130.39
   6  -2  -6 1588.74  151.58
   6  -2  -6 1558.14  138.19
   6  -2  -6 1590.64  153.88
  -6  -2   6 1520.15   91.39
   6   2  -6 1469.85  128.59
   6   2  -6 1365.66   96.59
   6   2  -6 1489.45   92.49
  -6   2   6 1492.65  126.99
   4  -2  -6  891.21   87.29
   4  -2  -6  949.80   93.09
   4  -2  -6  857.41   50.99
  -4  -2   6  896.41   54.39
  -4  -2   6  780.12   79.79
   4  -2  -6  891.51   80.59
   4  -2  -6  843.32   75.19
   4   2  -6  737.43   75.39
   4   2  -6  821.12   76.39
  -4   2   6  851.81   74.29
   4   2  -6  867.51   56.09
   4   2  -6  857.41   53.29
   2  -2  -6   16.00    9.60
  -2  -2   6    8.10    5.50
   2  -2  -6    8.40    3.10
   2  -2  -6    6.90    3.10
   2  -2  -6   14.60    3.40
   2  -2  -6   14.20    4.20
  -2   2   6    9.80    5.70
   2   2  -6   10.60    3.20
   2   2  -6    8.30    5.70
   2   2  -6    9.70    9.10
   0  -2   6 1408.46  142.59
   0  -2  -6 1456.25  146.29
   0  -2  -6 1503.15  134.49
   0  -2  -6 1426.26  126.09
   0  -2  -6 1466.55   86.79
   0   2  -6 1383.26  123.09
   0   2   6 1389.76  120.99
   2  -2   6  808.62   80.89
   2  -2   6  787.92   89.19
  -2  -2  -6  870.11   88.69
  -2  -2  -6  907.91   55.09
  -2  -2  -6  850.21   76.29
  -2  -2  -6  861.21   81.29
   2  -2   6  878.61   56.99
   2   2   6  911.01   54.39
  -2   2  -6  851.71   52.89
  -2   2  -6  874.21   76.79
  -4  -2  -6   79.99   11.40
   4  -2   6   87.29   10.30
   4  -2   6   82.59    8.40
  -4  -2  -6   76.69   11.60
  -4  -2  -6   90.99    9.70
   4  -2   6   68.69   15.90
  -4  -2  -6   95.39   10.50
  -4   2  -6   88.69   15.80
  -4   2  -6   68.59   11.60
   4   2   6   94.69    7.90
  -4   2  -6   54.19   15.10
  -6  -2  -6  103.49   12.10
  -6  -2  -6  104.89   14.00
   6  -2   6   93.79   10.10
  -6  -2  -6  118.39   14.30
  -6  -2  -6   97.49   11.20
  -6   2  -6  101.69   17.00
   6   2   6   96.69    9.00
  -8  -2  -6  181.88   20.20
   8  -2   6  169.58   16.30
  -8  -2  -6  223.78   21.60
  -8  -2  -6  201.48   23.80
   8   2   6  201.18   15.00
 -10  -2  -6  107.39   14.80
  10  -2   6   88.69   11.10
 -10  -2  -6  107.29   16.20
  10  -2   6   97.99    9.20
 -10   2  -6   72.59   23.20
  10   2   6  106.89    9.70
 -10   2  -6   76.29   19.10
  12  -2   6  613.84   38.80
  12  -2   6  532.05   40.40
 -12  -2  -6  629.04   62.19
  12   2   6  587.44   38.10
 -12   2  -6  420.66   68.49
 -14  -2  -6  187.58   22.20
  14  -2   6  146.29   14.60
  14  -2   6  167.38   12.80
 -14   2  -6  236.58   35.70
 -14   2  -6  108.59   28.70
  14   2   6  135.79   13.00
  16  -2   6   43.70    5.80
  16  -2   6   56.59    8.00
 -16   2  -6   67.49   16.20
 -16   2  -6   21.00   19.10
  16   2   6   51.49    6.60
  18  -2   6    4.00    2.90
 -18   2  -6   12.60   11.60
  20  -2   6   30.40    3.70
 -20   2  -6    3.30    7.80
 -23   3   6  -27.70   13.80
 -21  -3   6   96.99   20.70
  21  -3  -6  168.08   26.40
  21   3  -6  119.79   10.20
 -19  -3   6   30.70    9.50
  19  -3  -6   45.00   18.00
 -19   3   6   17.20   17.30
  19   3  -6   35.00    5.70
  19   3  -6   30.70    4.40
  17  -3  -6   34.50   14.10
 -17  -3   6   29.90    9.30
  17  -3  -6   26.90   24.80
 -17   3   6   22.40   16.10
  17   3  -6   39.00    6.40
  17   3  -6   35.30    4.60
  17   3  -6   29.80    5.40
 -15  -3   6   93.99   19.00
  15  -3  -6   80.59   24.50
  15  -3  -6  121.79   22.10
  15   3  -6   83.19    7.90
 -15   3   6   77.39   16.80
  15   3  -6   90.29    9.80
  15   3  -6  102.69    9.50
  13   3  -6   95.89  144.49
  11  -3  -6   25.10   10.60
 -11  -3   6   19.20    7.10
 -11  -3   6   17.60    9.40
  11  -3  -6   26.20    6.90
  11  -3  -6   37.60   10.30
  11  -3  -6   19.40   11.20
  11   3  -6   23.80    4.90
 -11   3   6   24.90   12.30
  11   3  -6   30.60  116.59
  11   3  -6   31.60   15.70
  11   3  -6   30.30    4.80
   9  -3  -6    5.10    7.00
   9  -3  -6   10.10    4.70
  -9  -3   6   12.40    8.10
   9  -3  -6   12.50    7.00
  -9  -3   6   15.10    5.80
   9   3  -6   16.90    3.60
   9   3  -6   21.20   13.90
   9   3  -6   14.10    7.00
   9   3  -6   16.80    4.10
  -9   3   6   14.70    9.30
  -9   3   6   19.50    5.00
   7  -3  -6  126.19   16.10
   7  -3  -6  127.79   14.60
  -7  -3   6  116.39   15.40
   7  -3  -6  124.19   16.50
   7  -3  -6  169.58   27.60
  -7  -3   6  123.79   15.70
   7   3  -6  115.39   23.40
   7   3  -6  122.19    9.80
  -7   3   6  127.49   19.30
  -7   3   6  132.09   14.30
   7   3  -6  128.79   10.70
   7   3  -6  106.99   15.60
   5  -3  -6  125.49   15.70
   5  -3  -6  129.59   14.00
  -5  -3   6  116.39   14.70
   5  -3  -6  118.39   14.90
  -5  -3   6  116.19   15.10
   5  -3  -6  114.59   26.40
   5   3  -6   94.69   15.10
   5   3  -6  126.59    9.50
  -5   3   6  139.99   14.30
   5   3  -6  122.99   10.30
   5   3  -6  120.69   23.30
  -5   3   6  138.69   19.70
  -3  -3   6  896.91   89.19
   3  -3  -6 1028.00   97.79
   3  -3  -6  996.20   90.19
   3  -3  -6  913.81   88.39
   3  -3  -6  933.71  105.19
  -3  -3   6  907.01   60.39
  -3   3   6 1025.50   85.79
   3   3  -6  914.41   59.29
   3   3  -6  847.62   86.29
   3   3  -6  952.30   62.19
   3   3  -6  853.61   84.49
  -3   3   6 1040.60   84.79
  -1  -3   6  132.79   13.80
   1  -3  -6  136.09   15.10
   1  -3  -6  136.89   16.60
   1  -3  -6  158.98   25.30
  -1  -3   6  129.69   15.60
   1   3  -6  133.29   23.80
   1   3  -6  107.39   15.80
  -1   3   6  118.99   21.80
  -1  -3  -6   80.89   11.30
   1  -3   6   83.79    8.30
   1  -3   6   72.69   10.80
  -1  -3  -6   83.89   10.20
  -1  -3  -6   77.69   11.20
  -1   3  -6   58.39   11.60
  -1   3  -6   84.19   19.50
   1   3   6   80.69    7.10
  -3   3  -6    2.80   12.10
  -5  -3  -6   -0.30    3.40
   5  -3   6    2.30    3.80
  -5  -3  -6    2.00  125.59
   5  -3   6    4.40    4.10
  -5  -3  -6    8.70    7.30
  -5   3  -6    1.00    8.00
  -5   3  -6    4.30   12.50
   5   3   6    1.20    3.90
  -5   3  -6   -7.00   10.20
   5   3   6    1.90    3.40
  -7  -3  -6  183.58   21.00
  -7  -3  -6  170.88   20.10
   7  -3   6  154.18   13.20
   7  -3   6  154.88   15.00
   7   3   6  179.88   13.10
  -7   3  -6  118.59   19.40
   9  -3   6   26.00    6.80
   9  -3   6   39.70    5.90
  -9  -3  -6   27.30    7.20
  -9   3  -6   33.70   20.00
   9   3   6   36.80    5.90
  -9   3  -6   26.70   15.90
   9   3   6  -17.60  116.79
  11  -3   6  602.24   39.50
 -11  -3  -6  618.84   63.09
  11  -3   6  532.45   41.20
  11   3   6  597.64   38.90
  11   3   6  182.38  141.59
 -13  -3  -6  230.68   24.90
  13  -3   6  175.98   14.60
  13  -3   6  151.28   16.20
 -13   3  -6  242.28   37.80
  13   3   6  194.48   15.10
  15  -3   6   23.50    4.30
  15  -3   6   21.60    5.50
  15   3   6   18.50    4.50
 -15   3  -6    0.70   17.50
 -15   3  -6   55.29   17.30
  17  -3   6   30.80    4.20
 -17   3  -6   45.30   13.80
  19  -3   6    7.00    2.10
 -19   3  -6   -4.70    6.00
 -20   4   6    2.20   14.70
 -18  -4   6   11.30    6.30
  18  -4  -6   15.90   16.60
  18   4  -6    4.40    3.40
 -18   4   6   10.00   14.30
  16  -4  -6  166.48   30.80
 -16  -4   6  138.69   18.70
  16   4  -6  -50.39  130.89
 -16   4   6   89.19   20.70
  16   4  -6  130.39   11.40
  14  -4  -6   15.30   18.90
 -14  -4   6    4.30    6.50
  14  -4  -6   81.99   25.10
  14  -4  -6    2.60   11.10
 -14   4   6  -11.20   11.30
  14   4  -6   22.60  156.48
 -12  -4   6   55.29   10.60
  12  -4  -6   80.49   22.70
  12  -4  -6   48.50   10.70
  12  -4  -6   31.90   16.50
  12   4  -6  239.58  170.08
  12   4  -6   41.30    6.30
 -12   4   6   43.80   13.90
  10  -4  -6   25.30   12.60
  10  -4  -6   45.40   13.20
 -10  -4   6   39.70    9.20
  10  -4  -6   30.60    8.40
  10  -4  -6   32.20   15.20
  10   4  -6   10.20  141.59
  10   4  -6   33.70    5.80
 -10   4   6   55.39    9.00
   8  -4  -6   -5.50    9.50
   8  -4  -6   -6.90    7.30
   8  -4  -6   -1.70    5.00
   8  -4  -6    5.50    8.60
  -8  -4   6   -1.00    5.20
  -8   4   6    1.60    5.20
   8   4  -6   -2.10    8.00
   8   4  -6    9.10  125.79
   8   4  -6    1.20    3.00
   6  -4  -6  135.29   16.80
   6  -4  -6  132.19   18.90
   6  -4  -6  133.79   19.10
  -6  -4   6  134.69   17.70
   6  -4  -6  152.18   19.30
  -6  -4   6   95.99   16.10
   6   4  -6  133.99   10.80
  -6   4   6  133.79   26.50
  -6   4   6  145.49   16.70
   6   4  -6  -63.09  132.39
   6   4  -6   89.69   26.40
  -4  -4   6  504.35   50.59
   4  -4  -6  531.35   55.19
   4  -4  -6  561.24   49.99
   4  -4  -6  481.45   51.09
  -4   4   6  380.06   57.19
  -4   4   6  524.65   48.20
  -2  -4   6   34.50    7.80
   2  -4  -6   22.70    6.60
   2  -4  -6   38.70    7.30
   2   4  -6   -9.60  108.59
   2   4  -6   16.20    9.70
   2   4  -6   -4.20   14.80
  -2   4   6   29.70  120.99
  -2   4   6   44.80    8.80
   0  -4   6   24.80    6.70
   0  -4  -6   21.60    6.20
   0   4  -6   10.50    9.70
   0   4   6  -15.50  104.39
   0   4  -6   -3.20   16.50
   0   4  -6  -24.00  122.19
   0   4   6   23.80    7.20
   2  -4   6   31.10    7.30
  -2  -4  -6   27.40    7.20
  -2   4  -6   19.70   10.80
   2   4   6   34.00    7.70
   2   4   6   13.90  119.69
   4  -4   6  231.48   22.50
  -4  -4  -6  185.08   23.10
   4   4   6  200.58   14.30
   4   4   6  172.28   20.10
  -4   4  -6  132.59   22.40
   4   4   6   -3.30  104.79
  -6  -4  -6  290.67   32.30
   6   4   6  242.98   27.10
   6   4   6   49.30  131.69
   6   4   6  295.67   19.90
   8   4   6   74.89  141.89
  10  -4   6  119.39   10.50
 -10  -4  -6  131.89   17.70
  10   4   6  138.39   11.30
  10   4   6   68.79  130.09
 -10   4  -6  101.99   21.10
  12  -4   6  170.98   14.40
 -12  -4  -6  222.98   24.50
  12   4   6   78.99  115.49
 -12   4  -6  176.18   33.80
  12   4   6  220.88   15.60
  14  -4   6   72.49    6.50
 -14   4  -6   77.29   18.70
 -16   4  -6   25.10   10.10
 -19   5   6    9.30   10.60
  17   5  -6   12.00   83.49
 -17   5   6    3.90   12.40
  15   5  -6  -46.90  116.59
 -13  -5   6   11.10    5.60
  13  -5  -6   58.19   20.80
  13  -5  -6   22.30   13.60
  13   5  -6  -54.79  135.79
  13   5  -6   13.70    4.00
  11  -5  -6  145.39   22.20
  11  -5  -6  109.19   23.60
 -11  -5   6  105.29   15.80
  11  -5  -6   80.39   19.70
  11   5  -6 -125.69  135.59
  11   5  -6   90.59    9.20
   9  -5  -6   13.90   17.00
  -9  -5   6    7.70    6.30
   9  -5  -6   21.40   11.80
   9  -5  -6   16.20    7.70
   9   5  -6  -30.90  153.58
   9   5  -6    9.60    5.00
  -7  -5   6  138.39   19.60
   7  -5  -6  132.69   22.70
   7  -5  -6  166.68   22.20
   7   5  -6   39.50  147.59
  -7   5   6  137.59   18.40
  -5  -5   6   40.30    9.60
   5  -5  -6   63.49   12.80
   5   5  -6   33.00  165.28
   5   5  -6   30.10   11.70
  -5   5   6   50.29   10.60
  -3  -5   6   35.40    8.70
   3   5  -6   44.00  161.38
   3   5  -6   23.10   11.20
  -3   5   6   30.80    9.00
  -1   5   6   25.30  135.99
   1   5  -6   23.90  130.49
   1   5  -6  137.29   20.40
   1  -5   6   67.99   11.80
  -1  -5  -6   56.79   11.70
   1   5   6   77.19  128.19
   1   5   6   53.39   11.00
  -3  -5  -6  280.37   29.80
   3   5   6  223.08   26.20
   3   5   6   15.00  124.59
  -5  -5  -6   92.39   14.10
   5   5   6   30.80  124.29
   5   5   6   83.59   11.60
  -7  -5  -6  164.18   19.60
   7   5   6   17.40  136.69
   9   5   6  -33.30  105.19
  11   5   6  -19.70   78.39
 -13   5  -6   20.40   15.30
  13   5   6   -9.10   72.09
  12   6  -6   33.40   96.59
  10   6  -6  -26.90  102.19
   8   6  -6   -9.60  108.99
   6   6  -6   33.70  120.89
   4   6  -6  -37.00  118.79
   0   6   6   74.09  117.79
   2   6   6    4.50  116.09
   4   6   6   -4.00  107.99
   6   6   6   84.89  115.69
   8   6   6  -15.20   70.19
  26   0  -7  268.17   18.40
  24   0  -7  156.58   14.30
  24   0  -7  178.48   12.70
  22   0  -7  118.19    9.70
  22   0  -7  128.09   11.90
  22   0  -7  114.69   25.70
 -22   0   7   66.09   29.10
  20   0  -7   71.79   19.00
  20   0  -7   79.49    7.30
 -20   0   7   57.79   25.10
  20   0  -7   85.19    9.70
  18   0  -7  967.50   61.29
  18   0  -7  825.42   91.59
  18   0  -7 1010.50   63.19
  16   0  -7   23.60    9.80
  16   0  -7   12.80    3.80
  16   0  -7   11.00    7.30
  16   0  -7   12.90    3.50
  16   0  -7   27.90   16.50
  14   0  -7  170.98   32.40
  14   0  -7  218.48   26.00
  14   0  -7  219.58   15.50
  14   0  -7  189.58   23.30
 -12   0   7 1999.90  116.09
  12   0  -7 2037.80  163.48
  12   0  -7 2028.40  125.49
  12   0  -7 1688.13  179.98
  10   0  -7 1899.71  183.08
  10   0  -7 1809.92  120.09
 -10   0   7 1936.61  110.99
  10   0  -7 1989.90  156.08
  10   0  -7 1670.73  172.48
   8   0  -7 5743.62  447.46
   8   0  -7 5271.07  523.95
  -8   0   7 5317.07  316.87
   6   0  -7  523.85   58.09
   6   0  -7  544.55   47.10
   6   0  -7  559.34   34.20
   4   0  -7  590.94   36.90
   4   0  -7  605.34   50.79
   2   0  -7   40.50    5.40
   2   0  -7   37.90    5.00
   0   0  -7   62.29    7.60
  -4   0  -7  292.67   19.20
   4   0   7  295.97   20.80
  -4   0  -7  274.37   21.40
  -4   0  -7  301.97   30.70
   6   0   7  996.90   64.49
   6   0   7 1135.09   67.89
  -6   0  -7  952.10   97.79
  -6   0  -7 1018.60   64.09
   8   0   7  253.77   36.20
   8   0   7  249.58   18.20
  -8   0  -7  231.28   20.10
   8   0   7  223.78   17.00
  -8   0  -7  268.47   28.50
  10   0   7  337.77   23.90
 -10   0  -7  281.57   36.70
  10   0   7  360.56   23.70
  10   0   7  305.27   22.50
 -10   0  -7  355.96   37.00
 -10   0  -7  351.16   26.20
  12   0   7    2.50    2.70
 -12   0  -7    1.20    8.90
 -12   0  -7    9.50   10.20
  12   0   7    3.50    4.10
 -14   0  -7   36.50   10.30
  14   0   7   52.29    5.80
 -14   0  -7   45.80   12.30
  14   0   7   47.90    7.10
  16   0   7   10.40    4.60
 -16   0  -7    5.00    6.80
 -16   0  -7    1.20    7.50
  16   0   7    4.10    3.00
  18   0   7   28.60    5.30
  18   0   7   25.70    3.90
  20   0   7    5.50    3.40
  27  -1  -7   45.90    4.30
  27   1  -7   41.30    4.40
  25  -1  -7   91.49    7.50
  25   1  -7   81.39    7.40
  23  -1  -7    6.50    2.90
  23  -1  -7  -16.40   19.60
  23  -1  -7    9.30    4.20
  23   1  -7    4.10    4.10
  23   1  -7   11.50    3.30
 -23   1   7  -13.60   24.90
  21  -1  -7   74.29   21.10
 -21  -1   7   35.50   23.40
  21  -1  -7   52.09    5.90
  21  -1  -7   34.10    6.40
  21   1  -7   61.59    6.60
  21   1  -7   60.29    8.30
  19  -1  -7  334.17   22.70
  19  -1  -7  331.07   24.30
  19  -1  -7  341.07   41.80
  19   1  -7  327.67   24.70
  19   1  -7  328.57   22.90
  19   1  -7  318.87   42.50
  17  -1  -7  225.58   29.40
  17  -1  -7  200.08   16.30
  17  -1  -7  196.78   14.80
  17   1  -7  226.48   29.20
  17   1  -7  202.68   16.70
  17   1  -7  212.78   15.00
  17   1  -7  191.48   15.10
 -17   1   7  255.27   31.10
  17   1  -7  219.98   25.70
 -15  -1   7  197.68   19.90
  15  -1  -7  215.58   15.70
  15  -1  -7  153.58   29.90
  15  -1  -7  202.28   26.70
  15   1  -7  210.78   16.00
  15   1  -7  207.68   24.30
  15   1  -7  220.68   14.80
 -15   1   7  189.18   27.90
  15   1  -7  224.78   28.00
  13  -1  -7  688.33   45.60
  13  -1  -7  730.83   67.19
  13  -1  -7  578.94   74.79
  13  -1  -7  799.52   77.09
  13  -1  -7  619.54   66.29
 -13  -1   7  712.53   46.90
 -13   1   7  564.64   64.29
  13   1  -7  647.14   67.39
  13   1  -7  774.52   62.99
  13   1  -7  704.63   46.00
  13   1  -7  730.73   43.80
  11  -1  -7 1115.69  117.49
  11  -1  -7 1251.87  129.99
  11  -1  -7 1213.08   81.69
  11  -1  -7 1328.17  130.59
 -11  -1   7 1296.57   78.79
  11  -1  -7 1409.96  118.89
  11   1  -7 1170.18  118.59
  11   1  -7 1353.06   78.49
  11   1  -7 1195.58   82.09
  -9  -1   7 2272.97  132.49
   9  -1  -7 2469.25  224.08
   9  -1  -7 2148.89  218.88
   9  -1  -7 2086.19  203.98
   9   1  -7 2070.39  142.49
   9   1  -7 2140.99  136.19
   9   1  -7 2536.85  185.28
   9   1  -7 1939.11  204.78
   7  -1  -7  603.14   69.69
   7  -1  -7  631.74   39.20
  -7  -1   7  649.14   42.40
   7   1  -7  614.64   57.39
  -7   1   7  730.73   57.99
   5  -1  -7  153.18   24.00
   5  -1  -7  144.09   11.20
   5   1  -7  152.88   18.00
  -5   1   7  161.08   16.20
   3  -1  -7  679.93   40.60
   3  -1  -7  628.94   71.79
  -3   1   7  648.34   56.29
   3   1  -7  699.83   41.40
   3   1  -7  649.43   58.19
   1  -1  -7  184.78   13.60
   1   1  -7  163.78   19.00
   1   1  -7  178.18   13.00
  -1   1   7  153.38   16.70
  -1  -1  -7 1111.19   64.99
   1  -1   7  918.11  108.59
  -1   1  -7 1140.69   63.99
  -1   1  -7 1053.79   89.99
   3  -1   7 1173.08  129.39
   3  -1   7 1296.57   82.29
  -3  -1  -7 1275.47   77.19
  -3  -1  -7 1372.86  118.19
  -3  -1  -7 1262.67  110.79
   3   1   7 1207.28   78.49
  -3   1  -7 1209.48  106.29
  -3   1  -7 1238.58   75.59
   5  -1   7 1416.06   86.19
  -5  -1  -7 1462.85  123.49
  -5  -1  -7 1334.47   81.09
  -5  -1  -7 1252.07  115.09
  -5  -1  -7 1308.87  133.99
   5  -1   7 1197.58  135.89
   5   1   7 1251.17   81.99
  -5   1  -7 1235.98   81.29
  -5   1  -7 1320.47   79.19
   7  -1   7  201.78   16.40
  -7  -1  -7  212.08   19.00
  -7  -1  -7  205.48   24.10
   7  -1   7  227.18   31.90
  -7  -1  -7  236.28   22.50
   7   1   7  191.48   15.00
  -7   1  -7  209.28   16.50
  -7   1  -7  164.08   28.60
  -9  -1  -7    7.70    6.30
  -9   1  -7   36.70   15.50
  11  -1   7  131.09   13.00
 -11  -1  -7  139.79   17.00
 -11  -1  -7  156.58   19.80
 -11  -1  -7  155.28   18.10
  11  -1   7  148.59   11.60
 -11   1  -7  117.79   25.50
  11   1   7  116.69   11.50
 -11   1  -7  192.88   30.50
 -13  -1  -7   18.30    8.20
  13  -1   7   18.50    5.80
  13  -1   7   19.00    4.20
 -13   1  -7   31.20   14.00
 -13   1  -7   17.80   16.30
  13   1   7    8.60    3.90
  15  -1   7   92.59    8.10
 -15   1  -7   96.99   16.50
 -15   1  -7   84.69   19.40
  15   1   7   59.59    8.20
  17  -1   7  203.58   17.20
  17  -1   7  240.08   15.60
 -17   1  -7  184.38   28.20
 -17   1  -7  191.18   27.00
  19  -1   7   52.39    5.60
  21  -1   7   54.29    5.10
  26   2  -7   27.90    3.50
  24  -2  -7   64.79    5.80
  24   2  -7   58.19    6.20
  22  -2  -7  -10.70   20.50
  22  -2  -7   17.60    3.30
  22   2  -7   11.00    4.50
  22   2  -7   18.30    3.70
  20  -2  -7  147.59   24.60
 -20  -2   7  148.59   26.20
  20  -2  -7  157.78   15.10
  20   2  -7  147.59   11.40
  20   2  -7  142.79   13.30
  20   2  -7  118.89   11.50
  18  -2  -7  433.26   31.10
  18  -2  -7  460.95   46.90
 -18  -2   7  324.47   48.40
  18  -2  -7  293.57   52.39
  18  -2  -7  288.47   56.39
  18   2  -7  402.56   27.30
  18   2  -7  436.16   29.30
  18   2  -7  471.55   48.20
  18   2  -7  419.56   27.40
  16  -2  -7  151.78   25.20
  16  -2  -7  158.68   24.10
  16  -2  -7  100.79   26.70
 -16  -2   7  133.29   20.20
  16   2  -7  142.69   11.60
 -16   2   7  177.48   21.50
  16   2  -7  128.49   25.00
  16   2  -7  138.69   10.90
  16   2  -7  135.19   12.70
  14  -2  -7  173.98   35.00
 -14  -2   7  220.88   23.20
  14  -2  -7  241.58   26.90
  14   2  -7  253.67   28.00
  14   2  -7  214.18   15.80
  14   2  -7  199.18   29.00
 -14   2   7  201.38   30.20
  14   2  -7  230.28   17.40
  14   2  -7  246.28   16.40
 -12  -2   7   71.99   13.70
  12  -2  -7   76.29   13.30
  12  -2  -7   70.19   13.50
  12  -2  -7   65.49   14.80
  12   2  -7   61.79    6.60
  12   2  -7   89.39   17.50
 -12   2   7   68.49   15.80
  12   2  -7   54.79    7.10
 -10  -2   7  275.47   24.80
  10  -2  -7  275.27   40.80
  10  -2  -7  291.97   30.30
  10  -2  -7  296.67   33.20
  10   2  -7  286.67   19.60
  10   2  -7  273.17   20.70
 -10   2   7  323.27   33.10
  10   2  -7  302.27   33.60
   8  -2  -7  337.97   44.30
  -8  -2   7  338.87   26.40
   8  -2  -7  340.77   33.40
   8  -2  -7  323.07   30.40
   8  -2  -7  353.16   36.20
  -8   2   7  356.46   34.50
   8   2  -7  316.17   35.60
   8   2  -7  341.37   21.90
   8   2  -7  327.27   23.10
   8   2  -7  266.87   35.30
   6  -2  -7  247.78   21.50
   6  -2  -7  200.68   20.10
  -6  -2   7  213.18   19.20
  -6  -2   7  204.28   22.30
   6  -2  -7  217.28   23.60
   6  -2  -7  207.98   21.90
   6  -2  -7  247.08   34.50
   6   2  -7  203.38   26.10
   6   2  -7  220.18   14.60
   6   2  -7  203.78   15.50
   6   2  -7  167.88   21.30
  -6   2   7  234.08   23.70
  -4  -2   7  364.66   26.90
   4  -2  -7  363.06   23.60
   4  -2  -7  371.36   35.70
   4  -2  -7  369.66   33.30
   4  -2  -7  373.36   38.60
   4  -2  -7  360.56   46.70
  -4  -2   7  346.07   35.60
   4   2  -7  358.06   23.60
   4   2  -7  358.66   24.80
  -4   2   7  378.76   35.10
   4   2  -7  351.56   37.50
  -2  -2   7  264.87   25.90
   2  -2  -7  226.28   21.10
  -2  -2   7  201.38   22.60
   2  -2  -7  230.78   22.80
   2  -2  -7  206.48   32.50
   2  -2  -7  233.58   16.70
   2  -2  -7  241.88   24.80
   2   2  -7  220.68   14.90
   2   2  -7  175.38   22.00
   2   2  -7  223.18   16.00
   2   2  -7  200.38   25.90
  -2   2   7  246.98   23.40
   0  -2   7  216.78   23.30
   0  -2  -7  238.68   23.60
   0  -2  -7  235.88   25.70
   0  -2  -7  221.18   18.20
   0  -2  -7  243.98   22.00
   0  -2   7  226.18   28.70
   0   2  -7  235.98   17.50
   0   2  -7  226.88   27.30
   0   2  -7  221.28   15.30
   0   2   7  238.58   15.90
   2  -2   7 1122.99  118.49
  -2  -2  -7 1342.37  130.59
  -2  -2  -7 1305.27  119.89
  -2  -2  -7 1240.98  112.29
   2  -2   7 1173.58  129.59
  -2  -2  -7 1299.97   78.99
   2  -2   7 1287.47   83.69
  -2   2  -7 1267.37   77.19
   2   2   7 1386.96   79.99
  -2   2  -7 1315.57  110.89
  -4  -2  -7   71.49    9.10
   4  -2   7   96.39   15.20
   4  -2   7   62.19    7.70
  -4  -2  -7   79.89   10.70
  -4  -2  -7   65.39    8.40
  -4  -2  -7   88.59   12.30
  -4   2  -7   65.49   14.70
  -4   2  -7   38.40   13.90
  -4   2  -7   44.90    9.50
   4   2   7   72.29    7.10
  -6  -2  -7  167.68   20.10
   6  -2   7  118.39   13.80
  -6  -2  -7  180.38   18.20
  -6  -2  -7  158.48   16.50
  -6  -2  -7  180.48   18.10
   6   2   7  181.28   13.00
  -8  -2  -7   19.90  141.29
   8  -2   7  151.18   15.20
   8  -2   7  161.18   13.70
  -8  -2  -7  196.58   19.60
  -8  -2  -7  178.18   21.60
  -8  -2  -7  167.08   19.10
   8   2   7  181.28   13.80
  10  -2   7  177.08   13.90
 -10  -2  -7  187.18   22.10
  10  -2   7  163.38   15.60
  10   2   7  181.88   14.10
 -10   2  -7  163.88   30.60
 -10   2  -7  127.99   28.00
  12  -2   7   95.59   11.80
  12  -2   7  107.39    9.90
 -12  -2  -7  104.89   15.80
 -12   2  -7  167.38   29.80
  12   2   7   92.09   10.00
 -12   2  -7   87.79   24.60
 -14  -2  -7  121.39   17.30
  14  -2   7  102.69   12.00
  14  -2   7  136.99   10.40
 -14   2  -7   96.99   23.60
  14   2   7   82.89   10.10
  16  -2   7  134.99   13.20
  16  -2   7  155.48   11.40
 -16   2  -7  103.69   22.70
 -16   2  -7  165.38   26.30
  16   2   7  128.69   11.40
  18  -2   7   83.89    7.20
 -18   2  -7   76.49   16.10
 -20   2  -7    4.30    6.50
  21  -3  -7   30.40   18.70
 -21  -3   7    5.40    7.00
  21   3  -7   13.90    3.90
  21   3  -7   15.50    3.20
 -21   3   7  -13.00   16.20
 -21   3   7  -21.60   12.80
  19  -3  -7    4.20   24.20
 -19  -3   7   60.59   12.00
  19  -3  -7   85.29   20.30
  19  -3  -7   68.29   19.70
  19   3  -7   39.80    6.10
  19   3  -7   58.09    6.00
 -19   3   7   40.20   18.10
  19   3  -7   42.00    6.60
  17  -3  -7   40.30   14.10
  17  -3  -7   17.80   23.30
 -17  -3   7   35.20   10.20
  17   3  -7   35.40    6.00
  17   3  -7   28.50    5.80
 -17   3   7    6.90   13.70
  17   3  -7   27.30    4.30
 -15  -3   7    8.60    7.10
  15  -3  -7    8.40   18.80
  15  -3  -7   13.80    9.70
  15  -3  -7   44.70   19.30
  15   3  -7    9.40    3.90
  15   3  -7    5.40    2.90
 -15   3   7  -12.40    8.90
  15   3  -7   47.60  133.89
  15   3  -7    3.50    3.90
  13  -3  -7   41.80   12.10
  13  -3  -7    6.70   14.50
 -13  -3   7   19.70    7.60
 -13   3   7   15.40   17.90
  13   3  -7  -28.00  130.79
 -11  -3   7  113.19   16.60
  11  -3  -7  128.99   18.50
  11  -3  -7  121.39   21.40
 -11  -3   7   83.79   15.90
  11  -3  -7  123.29   16.00
  11  -3  -7   98.49   18.80
  11   3  -7  102.09    9.30
  11   3  -7   92.09   21.80
 -11   3   7  139.79   25.00
  11   3  -7   13.30  130.29
  11   3  -7  105.89   10.60
  11   3  -7  106.39    9.90
   9  -3  -7  329.77   35.90
  -9  -3   7  310.87   32.80
  -9  -3   7  278.17   27.10
   9  -3  -7  305.17   33.30
   9  -3  -7  357.26   32.00
   9   3  -7  288.97   37.80
  -9   3   7  334.27   36.90
   9   3  -7  297.87   21.30
  -9   3   7  306.17   29.90
   9   3  -7  293.57   22.60
   7  -3  -7  143.19   15.30
   7  -3  -7  119.69   17.40
  -7  -3   7  140.29   17.70
   7  -3  -7  198.58   27.70
  -7  -3   7  137.49   16.80
   7  -3  -7  128.59   16.30
  -7   3   7  144.59   20.90
   7   3  -7  106.19   16.60
   7   3  -7  114.69   24.20
   7   3  -7  129.29   10.30
  -7   3   7  134.89   14.90
   7   3  -7  125.79   11.20
  -5  -3   7  290.47   24.70
   5  -3  -7  307.87   43.90
   5  -3  -7  300.97   28.80
   5  -3  -7  295.27   32.40
  -5  -3   7  281.37   30.00
   5  -3  -7  291.37   30.20
  -5   3   7  296.17   32.90
   5   3  -7  290.07   19.60
   5   3  -7  254.87   34.50
   5   3  -7  280.37   20.80
  -5   3   7  295.47   28.30
   3  -3  -7  378.06   46.10
  -3  -3   7  311.77   24.60
  -3  -3   7  285.67   30.80
   3  -3  -7  328.47   33.70
   3  -3  -7  319.27   31.20
   3   3  -7  292.47   20.10
   3   3  -7  315.87   21.60
  -3   3   7  328.67   40.80
   3   3  -7  241.88   30.00
   3   3  -7  288.97   37.10
  -1  -3   7  558.14   37.20
   1  -3  -7  574.64   53.19
  -1  -3   7  531.45   52.49
   1  -3  -7  594.34   57.79
  -1  -3   7  550.24   37.60
   1   3  -7  453.65   50.39
   1   3  -7  540.15   55.39
  -1  -3  -7  668.03   68.79
  -1  -3  -7  650.13   44.10
  -1  -3  -7  646.94   63.09
   1  -3   7  646.14   44.40
   1  -3   7  618.74   62.49
  -1   3  -7  634.34   64.19
   1   3   7  700.13   42.20
   5  -3   7   75.59    9.10
  -5  -3  -7   97.89   13.50
   5  -3   7   75.49   10.30
  -5  -3  -7   -1.60  139.69
  -5  -3  -7  107.89   15.60
  -5   3  -7   75.19   27.00
  -5   3  -7   78.29   14.50
   5   3   7  122.99    9.60
   5   3   7   98.49   11.80
   9  -3   7  480.45   41.60
  -9  -3  -7  653.93   64.19
   9  -3   7  575.44   40.20
   9   3   7  390.56  176.98
   9   3   7  669.73   39.80
  11  -3   7    8.10    5.40
 -11  -3  -7   10.40    6.90
  11  -3   7    6.70    4.10
  11   3   7   -9.40  108.39
 -11   3  -7   31.20   16.20
  11   3   7    7.40    4.10
 -11   3  -7   11.70   19.70
  13  -3   7   11.80    5.30
  13  -3   7   13.30    4.20
 -13  -3  -7   22.70    7.90
 -13   3  -7    9.90   18.60
  13   3   7    9.70    4.10
 -13   3  -7   40.70   16.90
  15  -3   7   21.30    4.10
  15  -3   7   21.10    5.40
 -15   3  -7  -10.70   13.90
  15   3   7   27.50    4.90
 -15   3  -7   48.90   15.00
  17  -3   7   72.09    6.60
 -17   3  -7   81.09   16.50
 -22   4   7  -11.30   10.10
 -20   4   7    0.10   14.40
  18  -4  -7   66.89   19.20
 -18  -4   7   56.69   10.90
 -18   4   7   45.00   16.00
  18   4  -7   59.69    7.40
 -16  -4   7   10.60    6.80
  16  -4  -7   10.30   14.70
  16  -4  -7    1.20   20.90
 -16   4   7    7.30   12.30
  16   4  -7   15.40  125.29
  16   4  -7    8.00    4.00
  14  -4  -7   42.80   13.70
 -14  -4   7   46.10   10.50
  14  -4  -7   44.30   20.70
  14  -4  -7  107.99   24.50
  14   4  -7   40.30    6.60
 -14   4   7   46.50   15.00
  14   4  -7  -20.60  154.48
  12  -4  -7   40.30   10.70
  12  -4  -7   29.80   16.00
  12  -4  -7   49.70   19.90
 -12  -4   7   36.40    9.60
  12   4  -7   17.10  139.29
 -10  -4   7   44.70    9.50
  10  -4  -7   57.29   13.20
  10  -4  -7   36.60    8.80
  10  -4  -7   32.60   13.80
  10  -4  -7   33.50   12.80
  10   4  -7    7.40  147.79
  10   4  -7   43.80    6.10
   8  -4  -7  344.77   42.00
   8  -4  -7  380.16   43.00
   8  -4  -7  436.26   38.70
   8  -4  -7  357.16   40.20
  -8   4   7  394.46   36.60
   8   4  -7  -34.20  139.59
   8   4  -7  335.37   25.20
  -6  -4   7  199.78   24.50
  -6  -4   7  189.28   30.60
   6  -4  -7  222.68   26.10
   6  -4  -7  210.28   25.50
   6  -4  -7  248.68   24.10
   6  -4  -7  214.38   26.80
  -6   4   7  224.98   23.50
   6   4  -7   68.39  138.99
   6   4  -7  203.28   15.70
   4  -4  -7  634.04   67.19
   4  -4  -7  712.13   64.89
  -4  -4   7  580.04   61.39
   4  -4  -7  604.54   61.79
   4  -4  -7  594.64   61.99
  -4   4   7  641.44   58.69
   2  -4  -7   48.40    9.00
  -2  -4   7   36.60    8.10
   2  -4  -7   39.20    8.90
   2   4  -7   -6.20   18.10
  -2   4   7   47.80    8.80
  -2   4   7   27.20  113.49
   2   4  -7  -10.80  114.19
   2   4  -7   26.30   11.60
   0  -4   7    2.60    5.00
   0  -4  -7    8.30    3.90
   0  -4  -7    0.30    4.70
   0   4  -7  -55.99  118.89
   0   4   7    6.80    5.80
   0   4  -7   -1.00    9.60
   0   4   7  -28.50  110.69
  -2  -4  -7   19.10    6.60
   2  -4   7   30.50    7.20
   2  -4   7   34.80    6.30
  -2   4  -7   20.40   11.20
   2   4   7  -33.00  113.49
   2   4   7   41.60    8.20
  -4  -4  -7  430.96   46.60
   4   4   7   19.40  146.09
   4   4   7  403.06   40.10
   4   4   7  439.86   28.60
   6  -4   7  111.09   12.70
   6  -4   7  108.99   10.90
  -6  -4  -7  158.48   18.90
   6   4   7  127.39   15.10
   6   4   7   30.00  128.39
   8  -4   7   19.70    4.40
  -8  -4  -7   19.80    7.10
   8  -4   7   20.80    6.00
   8   4   7  -32.60  126.49
  -8   4  -7    7.20   13.50
  -8   4  -7  -20.70   16.20
  10  -4   7  160.28   15.40
 -10  -4  -7  204.68   23.10
  10  -4   7  164.38   13.80
  10   4   7  205.48   14.70
  10   4   7   82.99  120.59
  12  -4   7   38.90    5.40
  12   4   7   57.29    6.80
 -12   4  -7   41.00   16.60
  12   4   7   -0.60   92.49
  14  -4   7   21.80    3.40
 -14   4  -7   38.60   14.80
 -16   4  -7   17.60    7.80
 -19   5   7   10.70   10.40
  17   5  -7  -17.50   77.39
  15   5  -7    5.90  124.09
  13  -5  -7   17.50   16.80
 -13  -5   7   25.00    7.40
  13  -5  -7   68.09   20.70
  13  -5  -7   40.30   14.10
  13   5  -7   75.69  146.29
  13   5  -7   21.80    4.70
 -11  -5   7   11.90    6.30
  11  -5  -7   33.20   19.40
  11  -5  -7   19.90   10.00
  11  -5  -7   32.10   14.90
  11   5  -7   10.30    4.00
  11   5  -7  -16.60  150.48
   9  -5  -7  313.27   47.60
   9  -5  -7  396.16   45.80
  -9  -5   7  411.66   40.30
  -9   5   7  386.06   37.00
   9   5  -7   23.80  154.08
   7  -5  -7  338.87   40.70
   7   5  -7   52.09  170.08
  -7   5   7  325.47   33.60
   5  -5  -7  103.29   17.30
   5  -5  -7   59.59   14.40
  -5  -5   7  103.69   16.30
   5   5  -7   21.20  158.28
   5   5  -7   55.59   14.00
  -5   5   7   76.69   13.90
   3  -5  -7  253.47   28.60
  -3  -5   7  237.18   28.00
  -3   5   7  212.78   25.20
   3   5  -7   51.99  146.59
  -1   5   7  -58.49  121.29
   1   5  -7   59.59   13.50
   1   5  -7   -5.30  120.09
   1  -5   7   29.70    8.60
  -1  -5  -7   30.90    7.60
   1   5   7    2.50  128.29
  -1   5  -7   13.90   10.90
   1   5   7   24.00    7.50
  -3  -5  -7  253.87   30.10
   3   5   7  258.47   26.60
   3   5   7   32.60  140.39
  -5  -5  -7  197.38   24.20
   5   5   7    0.00  114.49
   5   5   7  197.08   20.30
   7   5   7   33.60  131.99
   9   5   7   23.50  111.99
  11   5   7   -3.70   80.89
  12   6  -7   12.60   90.39
  10   6  -7  -38.50   96.89
   8   6  -7  -16.60  114.59
   6   6  -7  -14.90  116.99
   4   6  -7  -28.20  117.59
   0   6   7   43.50  133.59
   2   6   7  -49.90   93.79
   4   6   7   31.00  110.79
   6   6   7   34.80   90.19
  26   0  -8  112.69    8.80
  24   0  -8  201.88   14.10
  24   0  -8  171.88   15.60
 -22   0   8    8.40   24.70
  22   0  -8    1.50   17.80
  22   0  -8    0.00    2.60
  22   0  -8    2.10    4.10
 -20   0   8   25.30   22.10
  20   0  -8   37.10    4.90
  20   0  -8   40.60    6.70
  20   0  -8   38.90   15.10
  18   0  -8   -0.30    3.30
  18   0  -8    0.20    2.30
  16   0  -8  114.79   18.30
  16   0  -8  140.99   11.30
  16   0  -8  129.99   21.30
  16   0  -8  120.89    9.80
  14   0  -8 1827.22  157.18
  14   0  -8 2042.20  120.19
  14   0  -8 1654.83  172.28
  12   0  -8  145.99   19.80
  12   0  -8  140.59   17.80
  12   0  -8  146.59   11.40
 -12   0   8  156.28   13.80
  10   0  -8  139.89   18.50
 -10   0   8  127.29   12.40
  10   0  -8  130.49   15.70
  10   0  -8  128.09   10.20
  10   0  -8  142.79   20.50
   8   0  -8 1005.20   85.49
   8   0  -8 1002.70  102.89
   6   0  -8   49.20    6.50
   6   0  -8   47.60    8.10
   4   0  -8  993.00   57.09
   4   0  -8  898.91   78.69
   2   0  -8   57.79    6.70
   2   0  -8   44.20    5.40
   0   0   8  409.96   49.99
  -2   0  -8  128.89   12.70
  -2   0  -8  142.59   15.80
  -2   0  -8  122.99   12.10
  -2   0  -8  119.09    9.10
  -4   0  -8 1258.57   78.39
  -4   0  -8 1333.87  112.19
  -4   0  -8 1263.57   79.59
   4   0   8 1265.17   83.79
  -4   0  -8 1269.17  120.79
  -6   0  -8  152.38   19.10
  -6   0  -8  146.49   14.70
   6   0   8  152.88   12.30
   6   0   8  137.99   11.30
 -12   0  -8    9.80    8.50
  12   0   8    6.50    3.20
 -12   0  -8    6.20    9.20
  12   0   8    2.60    3.80
  14   0   8   94.09   10.10
  14   0   8   85.49    8.10
 -14   0  -8   99.69   16.10
 -14   0  -8   86.99   15.30
  16   0   8   22.50    5.40
 -16   0  -8   12.50    6.50
  16   0   8   27.90    4.10
  20   0   8   71.69    6.30
  27  -1  -8    8.10    2.30
  27   1  -8    8.60    2.40
  25  -1  -8  125.49    9.50
  25   1  -8  116.89    9.60
  23  -1  -8   78.89    7.10
  23  -1  -8   70.19    8.80
  23  -1  -8   65.19   24.40
 -23  -1   8   20.40   23.30
 -23   1   8   38.20   26.90
  23   1  -8   81.59    7.40
  23   1  -8   77.09    9.20
  21  -1  -8   90.19   20.70
  21  -1  -8   87.49   10.10
  21  -1  -8   91.39    8.30
 -21  -1   8   46.40   25.00
  21   1  -8  102.29    8.60
  21   1  -8  145.29   23.50
  21   1  -8   87.09   10.60
  19  -1  -8  256.77   20.50
  19  -1  -8  283.87   35.70
  19  -1  -8  251.87   18.80
  19   1  -8  274.97   19.10
  19   1  -8  294.67   36.10
  19   1  -8  278.47   21.10
  17  -1  -8  769.42   48.90
  17  -1  -8  708.83   74.29
  17  -1  -8  813.92   50.59
  17   1  -8  645.84   48.90
  17   1  -8  705.13   69.39
  17   1  -8  803.52   50.99
  17   1  -8  786.72   47.90
 -17   1   8  752.02   74.69
  17   1  -8  727.53   74.59
  15  -1  -8  211.28   15.60
 -15  -1   8  215.18   20.70
  15  -1  -8  141.09   33.30
  15  -1  -8  191.18   26.30
 -15   1   8  198.38   27.90
  15   1  -8  221.88   14.80
  15   1  -8  198.58   27.40
  15   1  -8  229.48   16.30
  15   1  -8  209.38   24.80
 -13  -1   8  287.77   23.60
  13  -1  -8  281.67   19.50
  13  -1  -8  206.98   35.30
  13  -1  -8  282.57   29.80
  13  -1  -8  269.07   30.50
  13   1  -8  287.97   18.60
  13   1  -8  277.37   19.80
  13   1  -8  252.37   31.30
 -13   1   8  243.88   32.10
  13   1  -8  323.67   29.80
  11  -1  -8  610.54   42.10
  11  -1  -8  580.84   61.09
  11  -1  -8  661.53   68.09
 -11  -1   8  650.83   43.50
  11  -1  -8  682.33   61.39
  11  -1  -8  654.53   71.89
  11   1  -8  609.34   42.50
  11   1  -8  614.64   62.49
  11   1  -8  669.33   40.50
   9  -1  -8   25.50   10.30
   9  -1  -8   40.80    6.30
  -9  -1   8   58.79    9.80
   9  -1  -8   28.30    6.60
   9  -1  -8   31.50    7.20
   9   1  -8   36.50    8.80
   9   1  -8   50.29   10.70
   9   1  -8   33.20    4.40
   9   1  -8   37.20    4.10
  -9   1   8   38.30   10.40
  -7  -1   8  456.75   30.90
   7  -1  -8  442.76   51.29
   7  -1  -8  435.16   27.30
   7   1  -8  423.06   40.50
   7   1  -8  415.56   27.60
  -7   1   8  486.85   40.60
   7   1  -8  393.06   29.00
  -5  -1   8    0.20    8.30
   5  -1  -8   20.90    4.10
   5  -1  -8   20.00    9.30
   5   1  -8   22.40    5.10
  -5   1   8   24.00    5.80
   5   1  -8   22.50    8.70
   3  -1  -8  711.73   42.80
  -3   1   8  711.23   58.89
   3   1  -8  626.24   60.19
   3   1  -8  718.23   43.30
   1  -1  -8 1062.79   62.29
   1  -1  -8 1061.69   91.19
   1  -1  -8 1007.80   96.29
   1   1  -8  893.21   86.29
   1   1  -8 1066.59   61.89
  -1  -1  -8 1350.36  117.29
  -1  -1  -8 1434.16   83.09
  -1  -1  -8 1469.65  125.49
  -1  -1  -8 1346.67   81.29
   1  -1   8 1411.26   87.39
  -1   1  -8 1133.59  125.89
  -1   1  -8 1155.88  112.19
  -1   1  -8 1353.86   82.99
  -1   1  -8 1358.06   80.29
  -3  -1  -8  281.27   24.80
  -3  -1  -8  233.18   22.20
   3  -1   8  257.37   17.80
  -3  -1  -8  229.68   26.20
   3  -1   8  190.08   34.90
  -3  -1  -8  233.78   19.50
  -3   1  -8  267.17   22.90
  -3   1  -8  238.08   15.90
  -3   1  -8  196.88   27.50
  -3   1  -8  227.98   17.60
   3   1   8  223.78   16.40
  -5  -1  -8  557.94   61.39
  -5  -1  -8  627.24   56.99
  -5  -1  -8  543.45   39.70
   5  -1   8  635.54   40.40
  -5  -1  -8  575.14   52.59
   5  -1   8  536.95   67.79
   5   1   8  575.94   38.00
  -5   1  -8  534.85   37.10
  -5   1  -8  575.44   38.10
  -5   1  -8  676.63   52.69
  -7  -1  -8  169.28   17.10
  -7  -1  -8  180.98   18.80
   7  -1   8  166.18   14.40
  -7  -1  -8  155.78   19.60
   7  -1   8  157.68   12.50
  -7   1  -8  170.18   14.90
   7   1   8  152.58   12.60
  -7   1  -8  146.09   26.60
  -9  -1  -8   24.00    6.70
  -9  -1  -8   35.20    9.00
   9  -1   8   37.80    6.70
   9  -1   8   38.80    5.40
  -9  -1  -8   23.80    7.10
  -9  -1  -8   25.30    6.30
   9   1   8   25.40    5.20
  -9   1  -8   26.40   12.40
  -9   1  -8   63.09   16.60
  11  -1   8  247.68   17.40
 -11  -1  -8  239.08   28.40
  11  -1   8  212.08   19.00
 -11  -1  -8  243.68   25.80
 -11  -1  -8  253.07   26.00
 -11   1  -8  243.88   33.30
  11   1   8  188.28   17.20
 -11   1  -8  260.17   34.80
  13  -1   8  220.68   19.30
 -13  -1  -8  192.38   25.90
 -13  -1  -8  236.98   26.10
  13  -1   8  245.98   17.40
 -13   1  -8  271.27   35.80
 -13   1  -8  288.67   33.20
  15  -1   8    9.70    3.80
  15  -1   8   13.70    5.30
 -15   1  -8    7.30    9.90
  15   1   8    3.80    3.80
 -15   1  -8   -1.20   11.70
  17  -1   8   37.70    5.00
  17  -1   8   43.90    6.70
 -17   1  -8   39.90   10.20
 -17   1  -8   53.09   11.00
  19  -1   8   35.50    4.60
 -19   1  -8   21.80    8.10
  26   2  -8    7.80    2.60
  24   2  -8   70.19    6.70
  22  -2  -8   92.69   25.60
  22   2  -8  114.59    9.50
  22   2  -8  117.99   11.40
 -20  -2   8  545.95   65.19
  20  -2  -8  536.35   61.99
  20   2  -8  610.44   37.70
  20   2  -8  521.65   36.80
  20   2  -8  572.84   39.60
  18  -2  -8   62.29   22.00
  18  -2  -8   60.69   27.00
  18  -2  -8  148.39   26.30
  18   2  -8   92.09    9.60
 -18   2   8  131.19   22.10
  18   2  -8  108.09   11.20
  18   2  -8  160.78   27.00
  18   2  -8  104.59    9.10
  16  -2  -8  131.49   27.40
 -16  -2   8  125.49   21.60
 -16  -2   8   99.29   21.70
  16  -2  -8  177.18   25.50
  16  -2  -8  143.69   23.10
  16   2  -8  165.38   12.00
  16   2  -8  152.48   11.20
  16   2  -8  144.89   12.90
  16   2  -8  120.99   23.50
 -14  -2   8   39.90   11.90
  14  -2  -8   69.09   17.80
  14  -2  -8   89.79   14.20
  14  -2  -8  102.49   17.20
  14  -2  -8   60.49   11.50
 -14   2   8   40.80   15.30
  14   2  -8   56.99   13.60
  14   2  -8  106.09   16.90
  14   2  -8   68.09    8.10
  14   2  -8   80.09    7.40
  14   2  -8   70.69    6.50
  12  -2  -8  651.63   72.89
 -12  -2   8  653.13   44.90
  12  -2  -8  604.74   60.09
  12  -2  -8  612.04   59.09
  12  -2  -8  580.04   66.19
  12   2  -8  670.83   59.09
  12   2  -8  502.95   60.69
  12   2  -8  582.44   41.30
 -12   2   8  679.73   61.39
  12   2  -8  618.84   39.30
  10  -2  -8  721.13   65.19
  10  -2  -8  720.93   80.59
  10  -2  -8  680.73   65.99
 -10  -2   8  680.83   47.80
  10  -2  -8  716.23   72.19
  10   2  -8  676.73   63.99
 -10   2   8  741.93   65.09
  10   2  -8  578.54   67.09
  10   2  -8  666.03   43.50
  10   2  -8  656.93   45.80
   8  -2  -8   44.40    9.30
   8  -2  -8   55.79    6.90
   8  -2  -8   47.50   15.90
  -8  -2   8   68.69   11.70
   8  -2  -8   51.49    8.50
   8  -2  -8   61.49    9.40
   8   2  -8   52.39    6.40
   8   2  -8   48.20   14.40
  -8   2   8   73.99   13.60
   8   2  -8   62.89    5.60
   6  -2  -8  126.19   25.90
  -6  -2   8  133.99   15.40
   6  -2  -8  128.39   15.80
   6  -2  -8  124.49   14.60
   6  -2  -8  154.98   14.50
  -6  -2   8  119.99   15.30
   6  -2  -8  124.69   13.20
   6   2  -8  136.59   10.60
   6   2  -8  101.69   15.00
  -6   2   8  133.09   16.60
   6   2  -8  134.49    9.70
   6   2  -8  151.48   22.90
   4  -2  -8  284.37   30.50
  -4  -2   8  268.07   28.20
   4  -2  -8  261.07   39.10
   4  -2  -8  272.77   26.20
   4  -2  -8  293.77   19.50
  -4  -2   8  320.17   23.40
   4   2  -8  269.17   18.60
   4   2  -8  270.67   19.70
  -4   2   8  314.77   28.70
   4   2  -8  294.27   32.80
   2  -2  -8  167.28   13.30
  -2  -2   8  143.29   16.20
   2  -2  -8  140.59   14.60
   2  -2  -8  151.08   17.30
   2  -2  -8  169.08   16.40
   2   2  -8  152.38   10.60
  -2   2   8  153.28   10.80
   2   2  -8  143.09   11.50
   2   2  -8  117.09   16.50
   2   2  -8  140.09   22.70
   0  -2   8 1066.79  104.09
   0  -2   8  908.21   94.39
   0  -2  -8  990.00   62.89
   0  -2  -8 1002.70   89.59
   0  -2  -8 1034.30  103.99
   0  -2  -8 1022.00   95.59
   0  -2   8 1055.29   66.89
   0   2  -8  967.50   63.09
   0   2   8 1095.69   63.79
   0   2  -8 1017.70   62.49
   0   2  -8  968.40   89.39
   2  -2   8   16.90    4.20
  -2  -2  -8   23.90    4.60
  -2  -2  -8   19.50    4.60
  -2  -2  -8   21.80    7.00
  -2  -2  -8   19.40    5.10
  -2   2  -8   16.30    6.70
  -2   2  -8   -1.00   10.40
  -2   2  -8   24.30    3.10
   2   2   8   25.60    4.20
  -2   2  -8    8.20   10.80
  -2   2  -8   21.70    5.40
  -4  -2  -8  490.25   52.89
  -4  -2  -8  513.05   48.60
   4  -2   8  481.35   34.60
  -4  -2  -8  457.15   35.30
  -4  -2  -8  476.05   45.30
   4  -2   8  573.24   57.59
   4   2   8  504.95   32.90
  -6  -2  -8  450.45   42.40
  -6  -2  -8  465.75   49.80
  -6  -2  -8  481.85   34.90
  -6  -2  -8  514.25   45.80
   6   2   8  492.85   31.10
  -6   2  -8  381.96   42.40
   8  -2   8  249.88   19.10
   8  -2   8  237.98   20.80
  -8  -2  -8  116.29  137.79
  -8  -2  -8  291.97   25.20
  -8  -2  -8  280.97   30.40
   8   2   8  260.07   44.80
  -8   2  -8  210.28   34.20
   8   2   8  324.47   19.70
  -8   2  -8  211.48   39.10
  10  -2   8  127.39   11.00
 -10  -2  -8  125.59   17.20
  10  -2   8  110.69   12.80
  10   2   8  118.49   11.10
 -10   2  -8  106.89   25.40
 -10   2  -8  152.18   30.20
  12  -2   8   16.60    4.70
 -12  -2  -8   16.80    7.00
  12  -2   8   14.00    5.90
 -12   2  -8   47.70   16.80
  12   2   8    9.70    4.30
 -12   2  -8   38.20   19.70
  14  -2   8   94.99   11.50
  14  -2   8  116.39    9.50
 -14   2  -8   80.09   20.40
  14   2   8   88.79    9.70
  16  -2   8  140.59   10.40
  16  -2   8  114.29   11.90
  16   2   8   95.69   10.50
 -16   2  -8  162.08   22.60
  18  -2   8   84.29    6.70
 -18   2  -8   59.09   12.90
  23   3  -8   25.20    3.70
 -21  -3   8    2.50    7.30
  21  -3  -8   -5.20   16.80
 -21   3   8  -23.00   12.40
  21   3  -8   11.10    4.20
 -21   3   8   -7.20   15.20
  21   3  -8    9.70    3.50
 -19  -3   8   44.00   11.00
  19  -3  -8   72.59   18.50
  19  -3  -8   25.90   24.80
  19  -3  -8   72.59   20.70
  19   3  -8   57.29    7.20
 -19   3   8   39.40   16.80
  19   3  -8   47.00    6.90
  19   3  -8   60.69    6.30
  17  -3  -8  107.19   19.10
 -17  -3   8  113.79   19.20
  17  -3  -8   49.30   26.10
  17   3  -8  111.19    9.90
 -17   3   8  113.49   19.80
  17   3  -8  102.69    9.10
  17   3  -8  109.29   11.00
  15  -3  -8   74.09   14.90
 -15  -3   8  105.19   17.70
  15  -3  -8  121.69   21.60
  15  -3  -8   81.19   22.90
  15   3  -8   96.19    9.20
  15   3  -8    2.70  138.79
  15   3  -8   81.49    8.00
  15   3  -8   86.49    9.70
  13  -3  -8  188.68   23.90
  13  -3  -8  221.38   25.50
 -13  -3   8  175.48   22.80
  13  -3  -8  155.58   27.50
  13  -3  -8  161.48   30.30
  13   3  -8  167.58   13.00
  13   3  -8  119.29  151.78
  13   3  -8  169.98   13.70
  13   3  -8  177.68   15.00
  11  -3  -8  127.79   16.70
  11  -3  -8   97.89   20.40
  11  -3  -8  110.19   17.60
 -11  -3   8   92.99   17.20
 -11  -3   8  148.69   17.40
  11  -3  -8  110.59   17.10
  11   3  -8   -3.40  131.29
  11   3  -8  102.59    8.80
 -11   3   8  101.19   21.00
  11   3  -8  109.59   23.20
  11   3  -8   94.29   10.30
  11   3  -8  103.59    9.40
   9  -3  -8   18.70    5.90
  -9  -3   8   16.10    6.30
   9  -3  -8    6.40    6.90
   9  -3  -8   14.40    5.30
  -9  -3   8   14.40    9.10
   9  -3  -8    9.30    5.70
   9   3  -8   13.10    7.40
   9   3  -8   20.90   14.00
   9   3  -8    9.80    3.30
   9   3  -8   14.20    4.30
  -9   3   8   18.60   10.70
   9   3  -8   26.00  146.99
  -9   3   8   19.00    5.50
   7  -3  -8   64.79    9.20
  -7  -3   8   50.99   11.10
   7  -3  -8   48.20    9.50
  -7  -3   8   45.30    8.70
   7  -3  -8   48.70    9.20
  -7   3   8   53.89   13.80
   7   3  -8   40.80   16.90
  -7   3   8   47.50    8.30
   7   3  -8   50.09    5.60
   7   3  -8   49.30    6.50
   7   3  -8   31.30    9.30
  -5  -3   8  152.68   17.30
   5  -3  -8  156.98   19.10
   5  -3  -8  152.68   17.70
  -5  -3   8  147.99   18.10
   5   3  -8  145.29   11.20
   5   3  -8  159.18   12.50
   5   3  -8  160.58   27.50
   3  -3  -8   55.69   10.50
  -3  -3   8   73.59   10.90
  -3  -3   8   63.99   11.20
   3  -3  -8   66.49    9.10
   3  -3  -8   69.99    9.90
   3   3  -8   70.09    7.40
   3   3  -8   65.99    6.10
   3   3  -8   58.99   11.70
   3   3  -8   62.69   17.90
  -1  -3   8  128.19   11.00
  -1  -3   8  124.69   14.90
   1  -3  -8  129.79   13.80
  -1  -3   8  120.19   14.80
   1  -3  -8  122.19   16.00
   1  -3  -8  125.59   14.50
   1   3  -8  100.29   16.90
   1   3  -8   84.29   21.60
   1  -3   8  189.28   15.20
  -1  -3  -8  196.88   20.50
   1  -3   8  183.88   20.30
  -1  -3  -8  191.18   22.60
  -1  -3  -8  190.68   18.10
  -1  -3  -8  197.68   19.40
   1   3   8  200.88   14.00
  -1   3  -8  121.99   26.00
  -1   3  -8  154.48   21.60
  -3  -3  -8  146.49   18.90
   3  -3   8  144.99   13.40
   3  -3   8  169.48   17.70
  -3  -3  -8  167.18   17.50
  -3  -3  -8  105.49  131.79
  -3  -3  -8  166.18   17.70
  -3   3  -8  111.29   25.70
   3   3   8  154.88   12.30
  -3   3  -8  158.18   11.70
  -3   3  -8  106.09   19.40
   5  -3   8   60.49    8.30
  -5  -3  -8   23.10  139.09
  -5   3  -8   66.19   11.70
  -5   3  -8   40.30   14.80
  -5   3  -8   41.60   16.50
  -7  -3  -8   85.99   12.90
   7  -3   8   63.89    9.80
   7  -3   8   60.39    8.10
  -7   3  -8   57.69   17.00
   7   3   8   93.79    8.60
  -7   3  -8   26.30   18.50
  -9  -3  -8  369.36   37.50
   9  -3   8  333.87   23.30
   9  -3   8  320.97   25.60
   9   3   8  351.16   23.20
  -9   3  -8  253.37   41.40
  -9   3  -8  246.18   46.90
   9   3   8  102.89  120.79
  11  -3   8   56.79    7.30
  11  -3   8   57.79    9.20
 -11  -3  -8   60.09   11.70
  11   3   8   69.09    8.20
 -11   3  -8   78.39   18.00
 -11   3  -8   41.80   20.80
  11   3   8   60.09  114.69
  13  -3   8   73.99    7.60
  13  -3   8   70.29    9.60
 -13   3  -8   69.29   17.00
  13   3   8   68.69    8.00
  15  -3   8   37.90    4.90
 -15   3  -8   56.29   13.70
  17  -3   8   53.69    4.90
 -17   3  -8   39.90    8.90
 -22   4   8   23.80   13.00
 -20   4   8    7.30   14.10
  18  -4  -8   83.29   20.10
 -18  -4   8   80.69   14.50
  18   4  -8   72.49    8.00
 -18   4   8   55.09   15.90
  16  -4  -8   32.60   15.50
 -16  -4   8   41.70   10.20
  16  -4  -8   11.70   20.40
 -16   4   8   58.89   14.50
  16   4  -8   39.70    6.30
  16   4  -8 -106.59  125.39
  14  -4  -8   99.89   17.60
 -14  -4   8   98.89   17.10
  14  -4  -8   84.69   23.60
  14   4  -8  103.99   10.00
  14   4  -8  -54.89  139.69
 -14   4   8  127.19   21.70
  12  -4  -8  155.98   25.40
  12  -4  -8  179.98   27.10
  12  -4  -8  172.28   23.50
 -12  -4   8  153.58   21.00
  12   4  -8  131.49   12.30
  12   4  -8  -89.69  153.08
  10  -4  -8   12.60    7.00
  10  -4  -8   17.90    9.90
  10  -4  -8   -2.20   11.00
  10  -4  -8   -0.20   10.40
 -10  -4   8   14.00    6.90
  10   4  -8   17.50    4.30
 -10   4   8   26.10    6.50
  10   4  -8   -6.60  141.59
  -8  -4   8   24.40    7.40
   8  -4  -8   14.10    9.20
   8  -4  -8   21.00    9.70
   8  -4  -8   30.80    7.50
   8  -4  -8   22.30    8.50
   8   4  -8   32.90  142.49
   8   4  -8   21.20   10.30
   8   4  -8   28.60    4.70
  -8   4   8   34.70    8.40
   6  -4  -8  156.38   20.80
   6  -4  -8  167.38   21.40
  -6  -4   8  179.98   20.70
   6  -4  -8  167.38   22.20
   6   4  -8  166.98   12.80
  -6   4   8  159.48   19.00
   6   4  -8   51.99  160.98
   4  -4  -8  524.85   52.49
   4  -4  -8  494.35   50.69
   4  -4  -8  534.15   54.99
  -4  -4   8  456.05   49.99
  -4   4   8  518.65   47.90
   4   4  -8   36.40  159.18
  -2  -4   8  266.37   23.00
  -2  -4   8  320.67   33.40
   2  -4  -8  314.27   35.90
   2  -4  -8  329.07   33.30
   2  -4  -8  367.56   34.00
  -2   4   8  304.07   31.70
  -2   4   8    5.30  125.19
   2   4  -8  -41.40  122.29
   0  -4  -8  139.29   16.10
   0  -4   8  133.69   17.40
   0  -4   8  113.59   12.00
   0  -4  -8  130.09   17.80
   0   4  -8   94.19   17.80
   0   4   8   45.10  130.59
   0   4   8  148.79   16.30
   2  -4   8    9.10    4.90
   2  -4   8   20.50    6.30
  -2  -4  -8    7.50    5.20
  -2   4  -8   17.50   11.30
   2   4   8   18.30    6.60
   2   4   8  -39.80  127.59
  -4  -4  -8   16.20    6.20
   4  -4   8    6.40    4.80
   4  -4   8   12.30    5.80
   4   4   8   28.40    5.20
   4   4   8  -51.29  109.79
  -4   4  -8   10.00   10.50
   4   4   8   32.30    7.30
   6  -4   8   68.59    9.60
  -6  -4  -8   70.39   12.50
   6  -4   8   50.49    7.00
   6   4   8   13.50  116.99
   6   4   8   74.89   10.60
   6   4   8   72.69    7.90
   8  -4   8   12.40    3.90
  -8  -4  -8   13.30    6.50
   8  -4   8    6.60    5.20
   8   4   8  -43.50  107.39
  -8   4  -8   -3.70   12.30
   8   4   8   18.40    4.60
  10   4   8  -23.10   96.69
 -10   4  -8   49.90   14.10
 -10   4  -8    4.10   16.80
  12  -4   8   25.80    4.00
 -12   4  -8   31.20   14.90
  12   4   8    9.20   86.89
  14  -4   8    2.40    2.30
 -14   4  -8   -2.60   10.70
 -19   5   8   27.80   11.00
  17   5  -8   -0.40   92.89
  15   5  -8   20.00  121.69
  13  -5  -8   53.99   19.70
  13  -5  -8   -5.20   11.90
  13  -5  -8    7.70   15.60
 -13  -5   8    4.60    5.30
  13   5  -8   12.70  141.69
  13   5  -8    4.10    3.10
  11  -5  -8  176.28   36.10
  11  -5  -8  249.48   29.40
 -11  -5   8  204.68   25.20
  11  -5  -8  226.68   33.20
  11   5  -8  -43.70  147.89
  -9  -5   8  127.89   20.30
   9  -5  -8  126.49   23.40
   9  -5  -8  177.48   22.10
   9  -5  -8  139.29   24.20
   9   5  -8   -0.50  150.48
  -9   5   8  180.78   18.10
   7  -5  -8  393.16   48.00
  -7  -5   8  497.15   45.70
   7  -5  -8  470.85   49.40
  -7   5   8  381.26   41.90
   7   5  -8   -9.10  148.29
   5  -5  -8  109.59   16.90
  -5  -5   8  101.49   17.80
   5  -5  -8   92.19   17.70
  -5   5   8   93.79   15.50
   5   5  -8   36.50  151.58
   3  -5  -8   20.90    7.20
  -3  -5   8   21.20    8.30
  -3   5   8   12.60    7.20
   3   5  -8  -43.20  135.99
   3   5  -8    9.60   10.70
  -1  -5   8  112.39   17.70
   1  -5  -8   75.89   13.80
  -1   5   8   67.99   13.00
  -1   5   8  -21.50  128.19
   1  -5   8   34.30    8.30
  -1  -5  -8   28.60    7.60
   1   5   8   18.30    7.30
   1   5   8   33.00  131.49
  -3  -5  -8  292.77   34.40
   3   5   8   36.90  140.59
   3   5   8  311.77   30.30
  -5  -5  -8   94.79   15.10
   5   5   8  127.89   12.20
   5   5   8  -13.90  117.59
   7   5   8   12.50  106.69
   9   5   8  -57.99   83.69
  11   5   8  -12.40   70.69
  12   6  -8  -12.60   85.29
  10   6  -8  -56.09  105.59
   8   6  -8   -0.70  107.09
   6   6  -8  -37.20  112.59
   4   6  -8   78.29  133.99
   0   6   8   38.10  123.39
   2   6   8   33.50  132.39
   4   6   8  -32.00   85.39
   6   6   8   -4.10   84.09
  28   0  -9  102.29    8.00
  26   0  -9    7.80    2.70
  24   0  -9    0.20    2.70
  24   0  -9    3.00    3.90
  22   0  -9   37.70   18.90
 -22   0   9    5.40   24.80
  22   0  -9   36.60    6.60
  22   0  -9   49.10    5.60
  20   0  -9    4.20    2.60
  20   0  -9    2.40   12.00
  20   0  -9    6.30    4.30
 -20   0   9    4.20   20.70
  18   0  -9   45.80   12.80
  18   0  -9   39.90   19.20
  18   0  -9   51.49    5.60
  18   0  -9   58.09    7.60
  16   0  -9  187.58   13.70
  16   0  -9  175.18   23.40
  16   0  -9  210.18   26.90
  16   0  -9  202.08   15.40
  14   0  -9   71.49    7.00
  14   0  -9   72.49   14.00
  14   0  -9   45.50   15.10
  14   0  -9   57.79   11.30
  12   0  -9 1609.14  110.19
  12   0  -9 1853.11  150.78
  12   0  -9 1671.73  165.88
  12   0  -9 1898.91  115.49
 -12   0   9 1867.91  107.59
  10   0  -9  752.82   78.29
 -10   0   9  902.31   52.59
  10   0  -9  844.42   54.19
  10   0  -9  851.51   71.89
  10   0  -9  856.21   86.79
  10   0  -9  760.82   51.29
   8   0  -9  134.79   21.90
   8   0  -9  143.69   12.00
   8   0  -9  131.99   15.40
   6   0  -9  224.78   16.60
   6   0  -9  229.58   21.80
   4   0  -9   61.79    7.20
   4   0  -9   46.60    6.60
   2   0  -9  177.28   15.30
   2   0  -9  228.38   20.00
   0   0  -9  784.32   65.39
   0   0  -9  699.23   46.30
   0   0  -9  766.22   70.39
   0   0  -9  699.63   46.40
  -2   0  -9  631.14   41.70
  -2   0  -9  646.94   40.80
  -2   0  -9  673.83   62.19
  -2   0  -9  642.94   57.29
   2   0   9  629.54   43.10
  -4   0  -9  108.49    8.50
   4   0   9  105.99    9.70
  -4   0  -9  117.79   15.20
  -4   0  -9  107.99   11.20
  -4   0  -9  104.79   12.70
   6   0   9   84.99    8.90
   6   0   9   85.79   22.30
  -6   0  -9  114.59   15.50
  -6   0  -9   85.79   11.60
   6   0   9   77.59    8.20
  10   0   9   83.49    7.80
 -10   0  -9   77.09   14.90
 -10   0  -9   98.59   16.10
  10   0   9   77.29    8.80
  10   0   9   87.39    9.40
  12   0   9    2.60    4.00
  12   0   9   -1.00    2.90
 -12   0  -9    0.60    8.00
 -12   0  -9    1.00    6.60
  14   0   9  117.59   12.00
 -14   0  -9  112.49   19.20
 -14   0  -9  134.09   17.90
  14   0   9  136.99   10.50
  27  -1  -9   83.99    6.40
  27   1  -9   76.39    6.50
  25  -1  -9   37.50    4.50
  25   1  -9   25.60    3.80
  23  -1  -9    3.80   18.70
 -23   1   9   -3.60   23.20
  21  -1  -9  319.47   45.00
  21  -1  -9  331.47   23.30
  21  -1  -9  332.37   25.10
  21   1  -9  330.67   44.40
  21   1  -9  350.96   23.60
  21   1  -9  349.17   25.60
  19  -1  -9   72.79    6.80
 -19  -1   9   23.60   20.10
  19  -1  -9   55.19   23.60
  19  -1  -9   78.79    8.80
  19  -1  -9   72.99   14.90
  19   1  -9   76.29    9.20
  19   1  -9   63.29   14.90
  19   1  -9   75.69    7.10
  17  -1  -9  559.94   37.20
  17  -1  -9  571.04   58.29
  17  -1  -9  599.64   38.80
  17   1  -9  512.25   57.69
  17   1  -9  608.34   39.40
  17   1  -9  573.44   55.19
 -17   1   9  493.65   58.59
  17   1  -9  563.34   36.60
  17   1  -9  547.25   37.30
  15  -1  -9   22.00    9.20
  15  -1  -9   16.20   13.20
 -15  -1   9   26.10    8.60
  15  -1  -9   29.50    4.80
  15   1  -9   24.10    4.80
  15   1  -9   33.90    4.50
  15   1  -9   30.90    4.60
 -15   1   9   37.20   14.10
  15   1  -9   29.80    9.50
  15   1  -9   17.50    9.60
  13  -1  -9   36.30    9.20
  13  -1  -9   46.20    5.30
  13  -1  -9   45.00    8.50
 -13  -1   9   40.30    9.40
  13  -1  -9   21.70   11.30
 -13   1   9   39.90   14.30
  13   1  -9   63.69   12.50
  13   1  -9   36.30    5.20
  13   1  -9   42.10   10.40
  13   1  -9   40.90    4.90
  11  -1  -9  676.13   72.39
  11  -1  -9  738.63   65.99
 -11  -1   9  765.62   47.20
  11  -1  -9  692.03   45.40
  11  -1  -9  620.74   65.79
  11  -1  -9  696.63   77.39
  11   1  -9  694.23   43.60
  11   1  -9  666.93   45.80
  11   1  -9  654.93   66.99
   9  -1  -9  338.57   32.00
   9  -1  -9  341.07   42.40
  -9  -1   9  372.86   26.00
   9  -1  -9  336.47   35.20
   9  -1  -9  290.07   32.50
   9   1  -9  323.97   21.10
   9   1  -9  318.37   22.50
  -9   1   9  266.67   32.00
   9   1  -9  274.07   33.50
   9   1  -9  391.96   33.10
   7  -1  -9   16.00    4.10
   7  -1  -9   16.60    9.60
   7  -1  -9   12.10    3.50
   7  -1  -9   13.90    4.00
   7   1  -9   13.00    3.20
   7   1  -9    7.10    8.00
  -7   1   9   21.50    6.90
   5  -1  -9  184.68   17.00
   5  -1  -9  183.48   28.40
   5  -1  -9  192.38   13.70
   5  -1  -9  187.18   18.50
   5   1  -9  145.59   17.20
   5   1  -9  204.08   14.90
   5   1  -9  169.28   12.20
   5   1  -9  169.28   13.10
   5   1  -9  185.28   20.30
  -5   1   9  201.78   18.60
   3  -1  -9  492.25   45.00
   3  -1  -9  467.75   30.20
   3  -1  -9  475.35   41.80
   3   1  -9  494.05   30.70
   3   1  -9  451.15   31.10
   3   1  -9  461.45   29.70
   3   1  -9  414.66   41.80
   1  -1  -9  380.96   35.10
   1  -1  -9  396.26   23.20
   1  -1  -9  356.66   24.90
   1  -1  -9  346.37   32.40
   1   1  -9  295.37   32.50
   1   1  -9  351.96   24.30
   1   1  -9  364.56   23.10
   1   1  -9  369.66   24.50
  -1  -1  -9  826.32   53.89
  -1  -1  -9  967.40   81.09
  -1  -1  -9  755.62   87.19
   1  -1   9  945.81   56.79
  -1  -1  -9  851.91   53.49
  -1  -1  -9  832.42   75.39
  -1   1  -9  831.92   53.39
  -1   1  -9  822.22   81.79
  -1   1  -9  817.22   52.79
  -1   1  -9  863.41   75.39
  -3  -1  -9 1081.99  114.69
  -3  -1  -9 1136.89   98.79
  -3  -1  -9 1239.38  106.09
   3  -1   9  943.11  118.09
  -3  -1  -9 1121.49   70.29
   3  -1   9 1206.88   74.19
  -3   1  -9 1132.19   69.89
  -3   1  -9 1125.99   68.79
   3   1   9 1124.69   70.59
  -3   1  -9 1038.20  107.09
  -5  -1  -9   56.59    9.10
  -5  -1  -9   50.29    8.90
  -5  -1  -9   54.79    7.00
   5  -1   9   47.00    7.00
  -5  -1  -9   59.89   10.10
   5   1   9    8.20   27.70
  -5   1  -9   59.99    8.50
  -5   1  -9   52.89    5.40
  -5   1  -9   63.99    7.70
   5   1   9   47.80    6.50
  -5   1  -9   50.99   12.50
  -7  -1  -9   82.39   11.10
  -7  -1  -9   62.99   11.30
   7  -1   9   61.69    8.10
   7  -1   9   71.39    7.50
  -7  -1  -9   65.89   11.10
   7  -1   9   75.19    9.30
  -7   1  -9   47.30   13.70
   7   1   9   68.89    7.80
  -7   1  -9   75.09   15.80
   7   1   9   71.39   26.40
   9  -1   9  315.37   22.10
  -9  -1  -9  337.97   32.70
  -9  -1  -9  287.67   26.30
  -9  -1  -9  311.97   33.00
   9  -1   9  313.37   24.00
  -9  -1  -9  298.27   34.80
  -9   1  -9  349.87   39.70
   9   1   9  298.47   22.10
  -9   1  -9  277.47   37.40
 -11  -1  -9  130.89   17.50
  11  -1   9  138.09   13.80
 -11  -1  -9  150.08   17.00
  11  -1   9  125.19   11.30
 -11   1  -9  159.78   27.90
 -11   1  -9  168.28   25.10
  11   1   9  113.79   11.90
  13  -1   9   42.80    7.90
  13  -1   9   67.49    7.00
 -13  -1  -9   46.30    9.20
 -13  -1  -9   54.79   10.00
 -13   1  -9   65.09   15.80
 -13   1  -9   60.19   13.00
  13   1   9   48.60    7.10
  15  -1   9   21.40    4.30
  15  -1   9   26.30    6.20
 -15   1  -9   25.00    9.30
 -15   1  -9    8.90   10.20
  17  -1   9   38.40    4.80
 -17   1  -9   35.00    9.00
  26   2  -9   11.80    2.80
  24   2  -9   55.59    6.00
 -20  -2   9  326.47   42.20
  20  -2  -9  310.77   42.60
  20   2  -9  315.27   22.20
  20   2  -9  315.87   24.20
  20   2  -9  313.27   22.10
  18  -2  -9  163.78   26.20
  18  -2  -9  102.09   29.40
 -18  -2   9   98.39   27.10
  18  -2  -9  168.68   29.20
  18   2  -9  152.68   28.00
  18   2  -9  178.28   14.40
  18   2  -9  160.68   12.60
  18   2  -9  159.98   11.90
  14  -2  -9  329.77   43.70
 -14  -2   9  365.66   30.90
  14  -2  -9  361.26   37.00
  14  -2  -9  311.97   36.90
  14   2  -9  371.26   23.40
  14   2  -9  337.57   23.10
  14   2  -9  288.27   38.80
  14   2  -9  347.47   24.90
 -12  -2   9  109.09   16.50
  12  -2  -9  114.49   16.90
  12  -2  -9  105.89   20.20
  12  -2  -9  115.99   15.10
 -12   2   9  142.99   24.50
  12   2  -9   76.39   16.10
  12   2  -9  113.89   10.40
  12   2  -9  133.19   19.40
  12   2  -9  115.79    9.30
  10  -2  -9  346.97   34.40
  10  -2  -9  376.36   40.20
 -10  -2   9  371.36   30.10
  10  -2  -9  376.56   36.60
  10  -2  -9  335.17   49.40
  10  -2  -9  372.86   36.80
  10   2  -9  302.87   38.50
  10   2  -9  370.26   39.00
  10   2  -9  369.16   25.80
 -10   2   9  404.16   39.20
  10   2  -9  364.16   24.20
   8  -2  -9   87.29   11.30
   8  -2  -9   98.09   23.50
   8  -2  -9   97.49   12.20
   8  -2  -9   83.09   12.70
   8  -2  -9   88.29    9.70
  -8  -2   9  104.59   14.40
   8   2  -9  102.19   20.10
   8   2  -9   89.89    8.50
  -8   2   9  103.29   14.50
   8   2  -9   64.09   12.10
   8   2  -9   83.49    7.30
  -6  -2   9  101.39   14.30
  -6  -2   9   66.29   10.80
   6  -2  -9   71.79    9.60
   6  -2  -9   66.79    8.30
   6  -2  -9   74.89   10.20
   6  -2  -9   59.79   18.30
   6   2  -9   75.69    6.40
  -6   2   9   82.69   12.10
   6   2  -9   79.79   16.60
   6   2  -9   78.19    7.50
   6   2  -9   60.19   11.10
   4  -2  -9  483.75   47.70
   4  -2  -9  455.65   58.29
   4  -2  -9  470.65   44.10
  -4  -2   9  477.45   33.30
   4  -2  -9  459.45   29.50
  -4  -2   9  426.96   43.60
   4  -2  -9  438.16   41.00
   4   2  -9  442.06   45.70
   4   2  -9  424.46   30.60
   4   2  -9  444.66   29.10
   2  -2  -9 1435.76  126.59
   2  -2  -9 1319.27  118.39
  -2  -2   9 1215.68  125.09
   2  -2  -9 1356.46  137.29
   2  -2  -9 1355.16   81.59
   2   2  -9 1366.66   87.79
  -2   2   9 1446.36   83.99
   2   2  -9 1265.67  116.69
   2   2  -9 1316.27   83.69
   0  -2  -9  230.78   22.40
   0  -2   9  227.48   16.40
   0  -2  -9  205.28   23.80
   0  -2  -9  225.38   18.20
   0  -2  -9  207.28   20.50
   0   2   9  215.68   15.10
   0   2  -9  175.08   26.80
   0   2  -9  193.88   14.20
   0   2  -9  213.18   17.10
  -2  -2  -9   84.99   10.60
   2  -2   9   84.79    8.50
  -2  -2  -9   81.99    9.50
  -2  -2  -9   81.69   11.60
  -2  -2  -9   77.79   11.10
   2   2   9   90.79    7.90
  -2   2  -9   83.99   10.40
  -2   2  -9   47.60   14.30
  -2   2  -9   68.69   12.00
  -2   2  -9   77.29    6.50
  -4  -2  -9  299.17   28.00
   4  -2   9  308.77   22.30
  -4  -2  -9  303.27   30.30
  -4  -2  -9  309.77   25.00
  -4  -2  -9  282.57   32.70
   4   2   9  325.07   21.00
  -4   2  -9  213.38   35.70
  -6  -2  -9  -30.30   95.89
   6  -2   9   40.70    6.10
  -6  -2  -9   36.00    9.70
   6  -2   9   35.60    7.10
  -6  -2  -9   33.60    7.60
  -6  -2  -9   49.00    8.70
  -6  -2  -9   40.50    7.80
  -6   2  -9   14.00   13.40
  -6   2  -9   42.60   16.30
  -6   2  -9   54.19    8.70
   6   2   9   47.80    6.20
   8  -2   9  382.46   32.40
  -8  -2  -9  133.49  149.29
  -8  -2  -9  502.75   49.00
   8  -2   9  413.16   30.90
  -8   2  -9  383.66   52.69
   8   2   9  483.05   30.70
   8   2   9  608.64   71.49
  10  -2   9   82.39   10.70
 -10  -2  -9   79.89   11.60
 -10  -2  -9   72.49   13.50
  10  -2   9   68.79    8.40
  10   2   9   66.69    8.80
 -10   2  -9   90.19   21.80
 -10   2  -9  129.39   24.90
  12  -2   9  135.89   14.40
  12  -2   9  152.18   12.30
  12   2   9  142.49   12.60
 -12   2  -9  209.18   28.70
 -12   2  -9  104.39   23.40
  14  -2   9   68.39    9.20
  14  -2   9   81.19    7.80
  14   2   9   63.49    8.00
 -14   2  -9   84.39   17.70
  16  -2   9  133.99   10.50
 -16   2  -9  128.29   19.50
  18  -2   9   15.60    2.80
 -18   2  -9   11.90    5.80
 -23   3   9  -23.70   14.60
 -21  -3   9   92.39   17.10
  21  -3  -9   65.59   20.60
  21   3  -9   82.29    8.90
 -21   3   9   51.19   17.60
  21   3  -9   76.39    8.00
  21   3  -9   87.89    7.40
  19  -3  -9   28.70   23.70
  19  -3  -9   39.50   16.90
 -19  -3   9   23.40    9.50
  19  -3  -9   51.69   19.20
  19   3  -9   24.80    5.50
 -19   3   9   49.70   14.30
  19   3  -9   39.00    4.90
  19   3  -9   27.50    5.30
 -17  -3   9   44.40   11.50
  17  -3  -9   64.19   20.10
  17  -3  -9   30.50   22.30
  17  -3  -9   44.90   14.60
  17   3  -9   41.80    6.90
  17   3  -9   43.60    5.60
  17   3  -9   32.00    5.70
 -17   3   9   63.69   14.70
  15  -3  -9   43.10   16.50
  15  -3  -9   32.90   19.50
 -15  -3   9   39.90   10.00
  15  -3  -9   31.20   11.20
  15   3  -9   34.30    5.70
  15   3  -9   37.60    5.00
  15   3  -9   30.60    5.90
  15   3  -9  -17.40  128.29
  13  -3  -9   59.39   17.40
 -13  -3   9   92.79   15.80
  13  -3  -9   91.69   17.70
  13  -3  -9   93.99   16.70
  13  -3  -9   76.29   13.50
  13   3  -9   83.99    8.40
  13   3  -9   87.79    7.70
  13   3  -9   82.99    9.70
  13   3  -9   35.90  153.78
 -11  -3   9   31.40    7.70
 -11  -3   9   28.70   11.20
  11  -3  -9   20.20    7.80
  11  -3  -9   16.50   10.30
  11  -3  -9   15.10    6.90
  11  -3  -9   21.70    8.40
  11   3  -9   31.60    5.80
 -11   3   9   28.10   12.70
  11   3  -9   15.00    3.90
  11   3  -9   24.80    3.90
  11   3  -9   21.70   15.50
  11   3  -9   29.80  133.39
   9  -3  -9   43.60   10.60
   9  -3  -9   81.79   12.40
  -9  -3   9   65.89   12.70
   9  -3  -9   64.39   10.60
  -9  -3   9   83.39   15.20
   9  -3  -9   60.59   10.90
   9   3  -9   62.99   20.00
   9   3  -9   64.09    6.50
  -9   3   9   66.39    9.80
   9   3  -9   69.29    7.10
   9   3  -9   67.79    8.30
   9   3  -9  -10.00  117.69
  -9   3   9   54.59   15.50
   7  -3  -9   26.50    6.50
  -7  -3   9   24.90    6.50
  -7  -3   9   19.90    9.20
   7  -3  -9   14.20    6.40
   7  -3  -9   31.90    6.30
   7   3  -9  -13.20  155.48
   7   3  -9   27.40    5.20
   7   3  -9   26.90    4.30
   7   3  -9   20.20    8.70
   7   3  -9   16.20   16.00
   5  -3  -9   18.80    6.10
   5  -3  -9   17.70    5.40
  -5  -3   9   13.50    7.80
  -5  -3   9   16.00    5.60
   5  -3  -9   24.60    5.60
   5   3  -9   16.50    8.50
   5   3  -9   21.20    3.60
   5   3  -9   15.40    4.20
   5   3  -9   44.30   16.30
   3  -3  -9  534.75   50.29
   3  -3  -9  504.95   46.80
  -3  -3   9  507.25   37.40
  -3  -3   9  487.85   49.60
   3  -3  -9  545.45   54.59
   3   3  -9  517.35   35.00
   3   3  -9  444.66   52.89
   3   3  -9  489.85   32.80
   1  -3  -9   65.19    9.50
  -1  -3   9   53.39    9.80
   1  -3  -9   65.29    9.00
  -1  -3   9   60.79    7.70
  -1  -3   9   65.89   17.00
   1  -3  -9   59.59   10.70
   1   3  -9   53.19   12.30
   1   3  -9   58.29   19.80
   1  -3   9  108.59   13.20
   1  -3   9   96.39   10.30
  -1  -3  -9   80.79   12.40
  -1  -3  -9  107.49   13.00
  -1  -3  -9   96.19   12.20
  -1  -3  -9  272.47  160.78
  -1  -3  -9   90.79   14.10
  -1   3  -9   79.79   14.80
  -1   3  -9   96.89    8.40
   1   3   9  112.29    9.30
  -1   3  -9   57.89   20.70
   3  -3   9  148.09   14.10
  -3  -3  -9  167.98   17.50
  -3  -3  -9  181.38   18.80
  -3  -3  -9  160.48   18.40
  -3  -3  -9  143.09   20.00
  -3  -3  -9    2.00  121.69
  -3   3  -9  125.29   20.50
   3   3   9  183.88   13.30
   5  -3   9  120.69   10.80
  -5  -3  -9   41.70  148.99
   5  -3   9   94.59   11.60
  -5   3  -9  120.49   17.00
  -5   3  -9   92.79   18.70
  -5   3  -9  151.88   28.40
  -7  -3  -9  -62.89  119.39
   7  -3   9   96.89   11.40
   7  -3   9   75.89    8.50
  -7   3  -9   36.10   18.30
  -7   3  -9   50.99   15.60
  -9  -3  -9   45.60   10.30
   9  -3   9   28.80    5.70
   9  -3   9   38.10    8.00
  -9   3  -9   35.00   14.70
  -9   3  -9   30.60   18.70
   9   3   9   39.60    6.40
   9   3   9   16.70  116.59
  11  -3   9  161.88   15.90
  11  -3   9  158.68   13.90
 -11  -3  -9  194.38   22.30
  11   3   9  171.28   14.30
  11   3   9   74.59  120.99
 -11   3  -9  225.08   30.70
  13  -3   9   38.70    5.20
  13  -3   9   21.10    5.70
 -13   3  -9   63.49   14.40
 -13   3  -9    4.30   14.10
  13   3   9   36.20    5.80
  15  -3   9  144.79   11.70
 -15   3  -9  187.68   22.00
  17  -3   9    5.50    2.00
 -17   3  -9    1.60    4.80
 -22   4   9  -21.60   12.00
  18  -4  -9  -16.30   19.10
 -18  -4   9   16.70    7.90
  18  -4  -9   -2.40   15.60
 -18   4   9   39.10   11.60
  18   4  -9   18.10    4.40
 -16  -4   9   38.00    9.90
  16  -4  -9   37.80   15.80
  16  -4  -9   30.10   21.20
 -16   4   9   67.19   14.40
  16   4  -9   30.70    5.60
  16   4  -9   -1.60  127.29
  14  -4  -9   53.89   20.30
  14  -4  -9   35.70   19.00
 -14  -4   9   31.20    9.20
  14  -4  -9   29.50   12.60
  14   4  -9   42.00  160.88
  14   4  -9   42.20    6.40
  12  -4  -9  178.78   31.80
 -12  -4   9  217.78   25.00
  12  -4  -9  210.38   27.00
  12  -4  -9  143.99   32.70
  12  -4  -9  215.48   28.80
  12   4  -9   46.40  163.38
  12   4  -9  197.38   15.30
  10  -4  -9  129.69   26.40
  10  -4  -9  161.58   24.10
  10  -4  -9  156.98   26.70
  10  -4  -9  228.68   23.80
 -10  -4   9  188.98   22.90
 -10   4   9  202.58   20.30
  10   4  -9   76.19  170.48
  10   4  -9  180.28   14.10
  -8  -4   9  182.88   22.90
   8  -4  -9  194.08   23.60
   8  -4  -9  191.28   25.80
   8  -4  -9  164.88   24.40
   8   4  -9    1.20  144.59
   8   4  -9  183.28   14.20
  -8   4   9  216.38   21.80
   6  -4  -9   12.00    8.00
   6  -4  -9   16.40    6.30
   6  -4  -9   15.40    6.60
  -6  -4   9   18.50    6.70
   6   4  -9   84.09  145.09
  -6   4   9   25.10    7.80
   6   4  -9   15.00   10.90
   6   4  -9   30.30    4.60
   4  -4  -9   80.39   12.70
   4  -4  -9   87.39   12.50
  -4  -4   9   82.29   13.70
  -4  -4   9   91.69    9.50
   4  -4  -9   59.79   13.50
  -4   4   9   83.89   12.30
  -4   4   9  -49.70  107.89
   4   4  -9  -19.60  162.48
   4   4  -9   45.70   13.90
  -2  -4   9  360.96   37.20
   2  -4  -9  353.06   37.10
   2  -4  -9  360.86   40.50
   2  -4  -9  388.66   38.10
  -2  -4   9  330.17   26.10
   2   4  -9  325.27   26.00
  -2   4   9   49.20  138.89
   2   4  -9   48.20  138.09
  -2   4   9  395.46   35.90
   0  -4   9    8.30    4.70
   0  -4  -9    2.40    4.60
   0  -4  -9   12.50    4.50
   0  -4   9    8.30    5.50
   0   4   9    8.50    6.20
   0   4  -9    7.60   10.80
   0   4   9  -28.10  133.49
   0   4  -9    8.20    3.80
   2  -4   9   30.10    6.50
   2  -4   9   43.10    7.60
  -2  -4  -9   20.70    7.40
   2   4   9    7.90  134.89
  -2   4  -9   14.50   11.30
   2   4   9   29.60    7.90
   4  -4   9   10.30    5.70
   4  -4   9    6.70    4.70
  -4  -4  -9   12.10    5.80
  -4   4  -9   15.30   10.30
   4   4   9   31.50    7.20
   4   4   9    0.60  134.99
   6  -4   9   99.89   12.30
   6  -4   9  124.39   10.60
   6   4   9   -1.70  136.09
  -6   4  -9  100.89   16.60
   8  -4   9   12.30    4.00
  -8  -4  -9   11.30    6.40
   8  -4   9    9.80    5.20
   8   4   9   37.70  117.59
  -8   4  -9  -12.70   11.00
   8   4   9   11.60    4.30
  10   4   9   40.50  108.59
  12   4   9   64.49   91.09
  14  -4   9    2.20    2.10
 -14   4  -9  -12.90    7.90
 -19   5   9   19.40   10.70
  17  -5  -9   22.70   12.20
  17   5  -9   60.79   96.59
  15  -5  -9   56.89   18.80
  15   5  -9    8.60  121.99
  13  -5  -9   19.50   15.30
 -13  -5   9   14.30    6.50
  13  -5  -9    7.10   13.50
  13  -5  -9   32.70   18.70
  13   5  -9   10.30    3.50
  13   5  -9  -32.20  138.89
  11  -5  -9  263.87   36.90
  11  -5  -9  211.18   38.10
 -11  -5   9  264.17   29.50
  11  -5  -9  306.37   34.60
  11   5  -9  253.37   18.50
  11   5  -9   26.90  150.28
   9  -5  -9  198.98   27.30
   9  -5  -9  150.38   29.90
  -9  -5   9  199.08   23.70
   9  -5  -9  132.79   25.40
  -9   5   9  215.18   20.60
   9   5  -9    3.50  137.49
   7  -5  -9   17.20    9.90
   7  -5  -9    1.90    9.10
   7  -5  -9   27.90    9.40
   7   5  -9    8.00   10.00
   7   5  -9  -62.29  142.59
   5  -5  -9   27.60    8.90
   5  -5  -9   34.00    9.40
  -5  -5   9   31.20    9.10
   5  -5  -9   41.60    9.80
   5   5  -9   15.70   10.70
  -5   5   9   39.40    9.70
   5   5  -9  -18.00  135.49
  -3  -5   9   73.09   13.10
   3  -5  -9   66.79   12.70
   3   5  -9   20.80  135.99
  -3   5   9   15.30  132.59
  -3   5   9   60.59   11.80
   1  -5  -9   57.09   10.50
  -1   5   9   36.40    8.90
  -1   5   9    8.40  129.69
   1   5  -9   12.30   10.70
  -1  -5  -9   54.09   10.70
   1   5   9  -25.90  116.79
   1   5   9   53.49   10.20
  -3  -5  -9  124.79   17.10
   3   5   9  -53.19  113.09
   3   5   9  128.69   15.40
   5   5   9  -15.40  110.19
   7   5   9   -7.60   92.79
   9   5   9  -46.20   75.19
  12   6  -9  -14.00   80.09
  10   6  -9  -45.70   94.59
   8   6  -9  -34.00  117.69
   6   6  -9  -44.40  111.79
   4   6  -9    9.40  104.49
   0   6   9   40.10  123.89
   2   6   9   18.80  112.49
   4   6   9  -13.00   83.29
  28   0 -10  131.99    9.60
  26   0 -10   55.39    5.40
 -22   0  10  -17.00   23.00
  22   0 -10    0.80   15.40
  22   0 -10   13.90    3.50
  22   0 -10   13.00    5.00
  20   0 -10  188.68   15.60
  20   0 -10  183.08   13.60
  20   0 -10  167.08   30.00
  18   0 -10   26.40   18.60
  18   0 -10   58.29    7.70
  18   0 -10   53.29   13.30
  18   0 -10   62.39    5.90
  16   0 -10  836.02   52.39
  16   0 -10  727.43   71.29
  16   0 -10  781.72   50.59
  16   0 -10  736.63   76.29
  14   0 -10   13.70    8.30
  14   0 -10   10.00    7.50
  14   0 -10    7.20    3.10
  14   0 -10   -0.80   11.50
 -12   0  10  274.67   22.00
  12   0 -10  285.07   29.10
  12   0 -10  270.87   18.40
  12   0 -10  278.07   31.30
  12   0 -10  301.87   20.30
  10   0 -10 1922.41  188.18
  10   0 -10 1923.31  121.79
  10   0 -10 1639.04  174.68
  10   0 -10 1991.10  158.08
 -10   0  10 2080.89  113.89
  10   0 -10 1763.62  115.99
   8   0 -10  232.58   15.90
   8   0 -10  258.17   18.30
   8   0 -10  248.28   17.10
   8   0 -10  232.18   23.60
   6   0 -10   66.19    8.10
   6   0 -10   50.09    4.80
   6   0 -10   53.59    8.20
   6   0 -10   59.59    6.50
   4   0 -10    7.20    3.90
   4   0 -10   16.70    3.30
   4   0 -10   12.50    2.20
   2   0 -10 3509.25  311.27
   2   0 -10 3207.08  196.28
   2   0 -10 3221.48  206.38
   2   0 -10 3447.66  291.67
   0   0 -10   82.49   10.00
   0   0  10   82.29    8.00
   0   0 -10   76.09    6.60
   0   0 -10   90.09    9.10
   0   0 -10   88.79   11.20
  -2   0 -10   72.99    9.90
   2   0  10   69.29    7.40
  -2   0 -10   73.99    6.50
  -2   0 -10   77.79   11.30
  -2   0 -10   74.19    8.30
   4   0  10   42.20    6.10
  -4   0 -10   39.30    5.70
   4   0  10    4.10   22.90
  -4   0 -10   34.90    4.60
  -4   0 -10   45.80    8.40
  -4   0 -10   42.30    8.40
 -10   0 -10    3.40    6.70
  10   0  10    1.40    4.20
 -10   0 -10    0.80    7.50
  10   0  10   -0.30    3.80
  10   0  10   -0.90    3.10
 -12   0 -10   63.19   12.30
 -12   0 -10   57.69   12.10
  12   0  10   57.49    6.50
  12   0  10   56.09    7.80
  14   0  10   -3.90    2.80
 -14   0 -10   -5.80    6.70
  14   0  10    1.00    4.30
 -14   0 -10    1.30    5.30
 -16   0 -10   27.90    6.70
  16   0  10   26.60    4.10
  27  -1 -10  106.99    8.00
  27   1 -10  105.59    8.10
  25  -1 -10   33.50    4.20
  25   1 -10   26.40    3.90
  23  -1 -10   -8.80   17.20
  21  -1 -10  125.39   10.30
  21  -1 -10  123.69   21.70
  21  -1 -10  124.39   12.20
  21   1 -10  121.49   12.70
  21   1 -10  136.49   10.80
  21   1 -10  174.68   29.50
  19  -1 -10  433.66   29.00
  19  -1 -10  382.16   45.70
  19  -1 -10  402.06   27.10
  19   1 -10  430.06   29.50
  19   1 -10  322.77   44.90
  19   1 -10  403.36   27.30
  17  -1 -10   51.99    5.30
  17  -1 -10   42.30   12.50
  17  -1 -10   54.49    7.00
  17  -1 -10   13.90   18.20
  17   1 -10   58.59    7.70
  17   1 -10   53.09    5.60
  17   1 -10   57.19    6.10
 -17   1  10   56.29   22.80
  17   1 -10   50.39   12.80
  15  -1 -10    7.50   13.80
 -15  -1  10   20.70    8.20
  15  -1 -10   15.90    8.90
  15  -1 -10   13.80    3.80
  15   1 -10   16.30    9.50
  15   1 -10   31.10   10.20
  15   1 -10   12.60    4.00
  15   1 -10   20.00    3.60
 -15   1  10   21.40   11.40
  15   1 -10   17.00    3.20
  13  -1 -10   17.90    5.30
  13  -1 -10    5.50    7.00
 -13  -1  10   11.90    7.20
  13  -1 -10   12.60    3.20
  13  -1 -10    8.40    9.50
  13   1 -10   17.90    4.10
  13   1 -10   19.40    9.10
  13   1 -10   13.70    2.90
  13   1 -10   10.30    8.00
 -13   1  10    8.00    8.40
  11  -1 -10   99.49   16.40
  11  -1 -10  109.29   12.60
 -11  -1  10  132.29   15.40
  11  -1 -10  141.99   21.30
  11  -1 -10  102.99   17.10
 -11   1  10  107.49   19.50
  11   1 -10   94.69    9.30
  11   1 -10  102.39    8.30
  11   1 -10   89.39   16.70
  11   1 -10  133.39   16.70
  -9  -1  10  191.78   18.10
   9  -1 -10  178.08   20.00
   9  -1 -10  167.88   13.10
   9  -1 -10  181.58   29.00
   9  -1 -10  159.38   15.70
   9  -1 -10  172.18   17.60
   9  -1 -10  134.99   19.10
   9   1 -10  197.28   20.00
   9   1 -10  167.58   11.60
   9   1 -10  140.59   20.00
   9   1 -10  164.78   12.80
  -9   1  10  142.09   19.30
   7  -1 -10  225.48   24.60
   7  -1 -10  219.68   22.80
   7  -1 -10  216.08   20.80
   7  -1 -10  207.78   33.30
   7  -1 -10  223.98   16.30
   7   1 -10  211.58   15.10
   7   1 -10  260.97   21.30
   7   1 -10  207.78   16.20
   7   1 -10  195.88   23.60
  -7   1  10  255.37   23.50
   5  -1 -10  158.88   20.40
   5  -1 -10  169.08   11.50
   5  -1 -10  154.08   13.20
   5  -1 -10  175.68   17.90
   5  -1 -10  175.38   16.30
   5   1 -10  172.68   19.20
   5   1 -10  156.28   14.10
   5   1 -10  160.88   12.70
   5   1 -10  160.58   11.60
   5   1 -10  187.38   16.70
   3  -1 -10  623.14   37.20
   3  -1 -10  583.54   52.49
   3  -1 -10  635.94   56.49
   3  -1 -10  571.64   37.60
   3   1 -10  562.64   37.30
   3   1 -10  586.34   39.20
   3   1 -10  600.94   38.00
   3   1 -10  507.15   51.49
   3   1 -10  606.74   52.59
   1  -1 -10  727.83   45.20
   1  -1 -10  621.94   73.39
   1  -1 -10  687.53   45.70
   1  -1 -10  641.74   63.59
   1  -1 -10  733.23   68.39
   1   1 -10  841.62   68.89
   1   1 -10  751.72   45.20
   1   1 -10  757.62   63.69
   1   1 -10  677.03   45.20
  -1  -1 -10 1025.40   66.89
  -1  -1 -10 1017.20   94.59
   1  -1  10 1060.09   70.89
  -1  -1 -10 1058.49   67.09
  -1  -1 -10  908.61  109.29
  -1  -1 -10 1075.09  101.39
  -1   1 -10 1117.59   67.09
  -1   1 -10 1049.79   65.99
  -1   1 -10 1226.48   94.69
  -1   1 -10 1169.18  102.29
  -3  -1 -10  911.41   81.89
   3  -1  10  882.71  100.59
  -3  -1 -10  834.82   94.79
  -3  -1 -10  988.10   88.09
  -3  -1 -10  937.11   59.59
   3  -1  10  966.60   61.89
   3   1  10  926.61   58.79
  -3   1 -10  931.71   57.99
  -3   1 -10  922.51   89.29
  -3   1 -10  928.61   58.09
   5  -1  10   55.59    7.80
  -5  -1 -10   59.69    7.80
  -5  -1 -10   67.29   11.40
  -5  -1 -10   64.49   10.00
   5   1  10   67.69    7.40
  -5   1 -10   70.39    9.70
  -5   1 -10   61.99    8.10
   5   1  10    7.30   30.40
  -5   1 -10   73.99   13.80
  -5   1 -10   56.89    5.70
  -7  -1 -10  120.99   15.30
   7  -1  10   99.69   12.20
   7  -1  10  102.39   10.00
  -7  -1 -10  112.89   14.00
   7  -1  10   97.89    9.80
  -7  -1 -10  125.69   15.00
   7   1  10  193.78   33.80
  -7   1 -10  145.49   22.60
   7   1  10  102.49   10.30
  -7   1 -10  100.09   19.50
   9  -1  10  175.38   16.20
  -9  -1 -10  182.48   20.80
  -9  -1 -10  182.18   21.30
   9  -1  10  164.38   14.10
   9   1  10  161.18   14.60
  -9   1 -10  239.88   29.10
  -9   1 -10  202.48   26.30
  11  -1  10   36.90    5.60
 -11  -1 -10   34.80    6.80
 -11  -1 -10   36.40    8.00
  11  -1  10   38.20    7.50
  11   1  10   41.00    6.70
 -11   1 -10   51.29   14.00
  13  -1  10   38.20    7.40
 -13  -1 -10   34.10    6.60
  13  -1  10   32.90    5.00
 -13   1 -10   14.50   11.20
 -13   1 -10   25.20    9.50
  13   1  10   22.50    5.10
  15  -1  10    3.10    3.30
  15  -1  10    4.80    4.50
 -15   1 -10    0.80    7.40
 -15   1 -10    0.80    6.90
  17  -1  10   10.00    3.20
 -17   1 -10   11.80    6.30
  26   2 -10   45.40    4.80
  24   2 -10   21.30    3.70
  22  -2 -10  -24.40   20.10
  22  -2 -10    4.50   18.00
  20  -2 -10    4.30   14.80
  20  -2 -10   -3.50   22.50
  20   2 -10   10.90    4.90
  20   2 -10    1.30    3.00
  20   2 -10    2.30    3.10
  18  -2 -10  319.57   41.70
  18  -2 -10  233.08   49.70
  18   2 -10  351.56   23.50
  18   2 -10  378.96   23.80
  18   2 -10  366.36   25.70
  18   2 -10  294.87   40.70
  16  -2 -10   97.09   23.60
  16  -2 -10  102.89   18.40
  16  -2 -10  126.39   23.50
  16   2 -10  115.19   11.20
  16   2 -10  121.89   10.20
  16   2 -10  111.39    9.30
  14  -2 -10  423.86   45.50
  14  -2 -10  391.96   50.89
 -14  -2  10  427.06   36.00
  14  -2 -10  483.95   45.80
  14   2 -10  392.06   46.80
  14   2 -10  463.25   29.40
  14   2 -10  435.16   29.40
  14   2 -10  457.05   31.20
  12  -2 -10  139.89   20.30
  12  -2 -10  160.38   23.50
  12  -2 -10  150.68   18.40
 -12  -2  10  169.98   19.90
  12   2 -10  159.38   11.90
 -12   2  10  121.29   21.90
  12   2 -10  159.08   13.20
  12   2 -10  182.38   22.90
  10  -2 -10  412.96   45.40
  10  -2 -10  474.95   50.19
  10  -2 -10  422.56   41.80
  10  -2 -10  543.15   60.99
  10  -2 -10  454.35   45.80
 -10  -2  10  483.65   36.30
  10   2 -10  474.85   47.50
  10   2 -10  465.75   32.20
 -10   2  10  509.65   47.20
  10   2 -10  464.15   30.30
   8  -2 -10  121.59   16.70
  -8  -2  10  113.39   16.60
  -8  -2  10  124.19   16.20
   8  -2 -10   91.39   24.50
   8  -2 -10  130.49   15.20
   8  -2 -10  122.69   13.30
  -8   2  10  149.79   18.00
   8   2 -10  143.79   10.10
   8   2 -10  137.09   11.20
   8   2 -10  140.59   22.80
  -6  -2  10  143.89   17.30
   6  -2 -10  150.68   17.20
  -6  -2  10  134.39   16.50
   6  -2 -10  131.69   14.40
   6  -2 -10  155.48   30.70
   6  -2 -10  144.19   15.90
   6   2 -10  145.69   22.70
   6   2 -10  135.09   11.50
   6   2 -10  144.89   10.60
   4  -2 -10  183.58   19.30
  -4  -2  10  161.08   19.10
   4  -2 -10  180.78   14.60
   4  -2 -10  169.58   17.70
   4  -2 -10  181.38   20.70
   4   2 -10  178.48   13.80
   4   2 -10  180.18   12.70
   4   2 -10  160.98   24.70
  -4   2  10  220.48   14.60
   2  -2 -10  314.77   29.40
   2  -2 -10  329.77   34.20
   2  -2 -10  320.97   23.30
   2  -2 -10  320.67   31.80
   2   2 -10  307.87   22.10
   2   2 -10  309.57   23.30
   2   2 -10  304.37   20.70
   2   2 -10  271.57   34.60
  -2   2  10  320.97   21.20
   0  -2 -10   -1.50    2.90
   0  -2 -10   -0.20    2.80
   0  -2 -10    1.40    4.90
   0  -2  10    0.60    3.10
   0  -2 -10    0.90    2.70
   0   2  10   -1.90    2.80
   0   2 -10    4.50    6.40
   0   2 -10    3.70    4.10
   0   2 -10   -0.40    1.70
  -2  -2 -10   89.89   12.60
  -2  -2 -10  108.79   14.10
  -2  -2 -10   89.19   10.60
   2  -2  10   99.09    9.60
  -2  -2 -10   87.09   11.80
  -2   2 -10   88.99   12.80
  -2   2 -10   86.89   10.80
  -2   2 -10   89.69    7.20
   2   2  10   97.89    8.60
  -2   2 -10   57.49   15.00
  -4  -2 -10  138.49   16.30
   4  -2  10  139.59   13.40
  -4  -2 -10   38.40  114.39
  -4  -2 -10  146.59   16.80
  -4  -2 -10  148.49   18.20
  -4  -2 -10  127.69   14.80
  -4  -2 -10  148.59   16.70
   4   2  10  144.49   12.00
  -4   2 -10  143.19   16.20
  -4   2 -10  155.38   25.60
  -6  -2 -10  333.97   38.00
  -6  -2 -10  349.96   35.70
  -6  -2 -10  328.87   28.60
  -6  -2 -10  368.36   35.20
  -6  -2 -10   62.59  125.79
   6   2  10  342.87   24.10
  -6   2 -10  290.87   43.00
   8  -2  10  178.18   15.50
   8  -2  10  155.88   17.10
  -8  -2 -10  200.18   24.00
  -8  -2 -10  227.68   22.40
  -8  -2 -10  -28.40  125.39
  -8  -2 -10  218.78   21.90
  -8   2 -10  163.18   29.40
  -8   2 -10  224.38   35.90
   8   2  10  176.88   15.40
 -10  -2 -10   69.39   10.70
  10  -2  10   67.89    9.60
  10  -2  10   55.89    7.80
 -10   2 -10   66.59   19.10
  10   2  10   61.19    8.10
  14  -2  10   24.10    5.80
  14  -2  10   17.00    4.10
 -14   2 -10   29.50    9.80
 -14   2 -10    0.30    9.40
  14   2  10   12.20    4.10
  16  -2  10  125.09   10.30
 -16   2 -10  146.79   17.80
  18  -2  10   28.70    3.90
  23   3 -10   22.20    3.60
  21  -3 -10   98.99   22.20
 -21  -3  10  101.89   15.50
  21   3 -10  104.69   10.20
  21   3 -10   85.39    8.80
  21   3 -10  101.39    8.40
 -19  -3  10    3.00    8.00
  19  -3 -10   -1.70   21.30
  19  -3 -10   24.10   17.80
  19  -3 -10   11.20   15.10
  19   3 -10    9.40    3.90
  19   3 -10    7.80    3.30
  19   3 -10    9.40    4.50
 -17  -3  10  103.29   18.60
  17  -3 -10   48.20   24.20
  17  -3 -10  103.99   21.80
  17  -3 -10   80.89   17.60
  17   3 -10   95.49    8.50
  17   3 -10   91.09    9.30
  17   3 -10   94.79   10.40
 -15  -3  10   42.20   10.10
  15  -3 -10   48.40   20.00
  15  -3 -10   46.60   12.30
  15  -3 -10   27.30   15.10
  15  -3 -10   51.09   13.50
  15   3 -10  -28.10  129.99
  15   3 -10   45.10    5.70
  15   3 -10   47.10    7.50
  15   3 -10   43.60    6.20
  13  -3 -10   62.79   17.90
 -13  -3  10  112.59   16.70
  13  -3 -10  112.19   17.80
  13  -3 -10   71.19   13.70
  13  -3 -10   94.39   15.90
  13   3 -10  112.19    8.80
  13   3 -10  100.99    9.10
  13   3 -10  145.89  169.78
  13   3 -10  101.69   10.50
  11  -3 -10  230.48   30.20
 -11  -3  10  222.08   25.10
  11  -3 -10  212.58   26.00
  11  -3 -10  235.68   26.50
  11  -3 -10  216.68   26.10
 -11  -3  10  217.08   26.20
  11   3 -10  210.48   32.00
  11   3 -10  225.68   17.90
 -11   3  10  247.88   32.10
  11   3 -10  226.78   16.20
  11   3 -10  229.28   16.50
  11   3 -10   -9.30  143.69
   9  -3 -10   84.89   13.40
   9  -3 -10   75.19   11.40
   9  -3 -10   72.69   11.80
   9  -3 -10   58.19   12.40
  -9  -3  10   83.49   15.30
  -9  -3  10   73.69   13.30
   9   3 -10   49.99   11.60
   9   3 -10   72.89    7.40
   9   3 -10   82.49    9.10
   9   3 -10   63.09   19.10
  -9   3  10   86.59   11.00
   9   3 -10   11.60  148.59
   9   3 -10   72.39    6.90
   7  -3 -10   19.20    5.60
   7  -3 -10   23.20    7.10
  -7  -3  10   27.50    6.90
  -7  -3  10   19.50    9.90
   7   3 -10  -16.80  116.49
   7   3 -10   26.90    5.30
   7   3 -10   31.90   17.60
   7   3 -10   21.50    9.10
   7   3 -10   29.90    4.50
   7   3 -10   39.50    4.50
   5  -3 -10   43.80    7.30
   5  -3 -10   32.60    7.20
  -5  -3  10   26.60    6.90
   5  -3 -10   44.90    7.60
  -5  -3  10   40.70   11.00
   5   3 -10   33.50   17.90
   5   3 -10   38.80    6.10
   5   3 -10   35.10   10.50
   5   3 -10   36.80    4.80
   5   3 -10    0.10  115.09
   3  -3 -10  501.05   46.10
   3  -3 -10  471.85   42.80
   3  -3 -10  474.35   49.80
   3  -3 -10  489.15   47.40
  -3  -3  10  468.05   35.50
  -3  -3  10  445.36   45.20
   3   3 -10  442.86   29.90
   3   3 -10  444.36   30.90
   3   3 -10   28.30  142.19
   3   3 -10  360.46   48.90
  -1  -3  10  125.89   15.90
  -1  -3  10  125.69   12.20
   1  -3 -10  139.29   15.30
   1  -3 -10  130.69   15.70
   1  -3 -10  118.89   17.10
   1  -3 -10  130.59   14.70
   1  -3 -10   78.19  124.89
   1   3 -10  143.99   10.90
  -1   3  10  147.09   13.40
   1   3 -10   69.49  140.59
   1   3 -10  111.39   19.50
   1   3 -10  109.69   25.20
   1   3 -10  124.19   10.10
   1  -3  10   47.70    7.40
  -1  -3 -10  107.59  142.49
  -1  -3 -10   47.60    8.30
  -1  -3 -10   51.69    7.90
  -1  -3 -10   45.10   10.00
  -1  -3 -10   49.00    8.70
  -1  -3 -10   49.30   10.20
  -1   3 -10   51.09    5.90
   1   3  10   48.20    6.60
  -1   3 -10   33.40   11.20
  -3  -3 -10   35.70    8.30
  -3  -3 -10   56.19    8.60
  -3  -3 -10   48.20    8.50
  -3  -3 -10   58.39   15.90
   3  -3  10   33.10    6.60
  -3  -3 -10   18.80  134.79
  -3   3 -10   32.60   10.80
   3   3  10   46.20    6.50
   3   3  10   -3.90   31.40
   5  -3  10   80.89    9.50
  -5  -3 -10  128.09   15.60
   5  -3  10   80.29   11.30
  -5  -3 -10    4.90  128.39
  -5   3 -10   60.09   16.90
  -5   3 -10   93.99   19.30
   5   3  10  125.49   10.20
  -5   3 -10  103.59   15.50
   7  -3  10  257.87   21.40
   7  -3  10  279.67   19.20
  -7  -3 -10  -24.50  129.19
  -7   3 -10  199.68   37.60
  -7   3 -10  240.18   33.50
   9  -3  10   18.40    4.90
   9  -3  10   17.90    6.60
  -9  -3 -10   19.30    7.50
  -9   3 -10   30.90   12.80
   9   3  10  -19.20  115.79
   9   3  10   21.60    5.30
  -9   3 -10    2.40   15.40
  11  -3  10   53.99    6.80
  11  -3  10   56.89    8.10
 -11   3 -10   59.49   14.00
  11   3  10   46.50    6.70
  11   3  10  133.19  128.29
 -11   3 -10   25.80   15.40
 -13   3 -10   29.00   11.60
  15  -3  10   67.09    6.30
 -15   3 -10   79.39   12.80
 -22   4  10  -17.50   11.70
  18  -4 -10    7.00   20.00
  18  -4 -10   12.60   15.70
 -18  -4  10   23.20    8.20
  18   4 -10   28.00    5.00
  16  -4 -10   61.79   22.10
  16  -4 -10   -5.70   18.40
  16  -4 -10   -0.60   13.30
 -16  -4  10    2.90    6.90
  16   4 -10   14.70  133.49
  16   4 -10    9.10    4.00
  14  -4 -10   14.40   17.00
  14  -4 -10   38.70   19.10
  14  -4 -10   10.50   11.60
 -14  -4  10   18.60    8.30
  14   4 -10   17.70    4.70
  14   4 -10   -3.30  145.89
  12  -4 -10    6.40   13.60
  12  -4 -10    6.50    9.10
  12  -4 -10   29.20   11.40
  12  -4 -10   -0.30   13.90
 -12  -4  10   28.50    8.50
  12   4 -10   27.10    5.20
  12   4 -10  -34.10  133.39
  10  -4 -10  123.39   19.50
 -10  -4  10  130.79   18.90
  10  -4 -10  153.68   21.00
  10  -4 -10  147.09   21.10
  10  -4 -10  117.19   23.10
  10   4 -10  127.49   11.20
  10   4 -10  134.79   12.20
  10   4 -10  130.79   12.70
  10   4 -10  -52.59  154.78
  -8  -4  10  191.08   23.30
   8  -4 -10  198.98   26.40
   8  -4 -10  182.08   23.50
   8  -4 -10  157.28   24.70
   8   4 -10   24.40  157.08
   8   4 -10  200.08   14.70
   8   4 -10  201.88   14.50
  -8   4  10  215.88   22.40
   8   4 -10  193.28   16.30
   6  -4 -10   95.89   15.30
   6  -4 -10  102.19   17.30
   6  -4 -10  104.49   15.60
   6   4 -10  112.19    9.40
   6   4 -10  111.99    9.30
   6   4 -10  -54.79  144.59
  -6   4  10  112.39   15.00
   4  -4 -10   43.50   10.30
   4  -4 -10   67.19   11.50
   4  -4 -10   73.39   11.40
  -4  -4  10   67.29   12.70
  -4  -4  10   52.89    7.70
  -4   4  10  107.59  153.28
  -4   4  10   66.89   11.60
   4   4 -10   62.99    6.90
   4   4 -10  -37.50  137.29
   4   4 -10   45.00   13.50
  -2  -4  10   56.79    8.00
  -2  -4  10   75.19   13.00
   2  -4 -10   72.49   11.10
   2  -4 -10   43.80   10.20
   2   4 -10   65.29    7.10
  -2   4  10   82.49   12.10
   2   4 -10   44.40   13.60
   2   4 -10  -57.29  128.79
   0  -4 -10   28.00    6.60
   0  -4 -10   15.50    6.70
   0  -4  10   20.70    5.70
   0  -4  10   31.10    7.10
   0   4 -10   10.60   11.10
   0   4 -10   25.10    4.70
   0   4  10   28.90    8.00
  -2  -4 -10   53.09   11.50
   2  -4  10   57.59    8.60
   2   4  10   77.29   11.90
   2   4  10  -27.70  138.79
  -2   4 -10   37.30   12.30
   4  -4  10   32.60    7.20
   4  -4  10   33.50    5.70
  -4   4 -10   45.40   11.20
   4   4  10  -17.70  130.99
  -6  -4 -10    5.90    6.10
   6  -4  10   -1.00    4.80
   6  -4  10    1.50    3.80
   6   4  10    2.70    3.70
   6   4  10   33.40  123.69
   8  -4  10   49.40    7.70
   8  -4  10   53.39    6.30
   8   4  10   67.59    7.30
   8   4  10  -21.90  111.39
  -8   4 -10   29.70   11.90
  10  -4  10   19.00    3.80
 -10   4 -10   11.20   11.40
  10   4  10    5.80  101.49
  12   4  10  127.69   88.29
 -19   5  10   12.00    9.60
  17  -5 -10   17.60   11.90
  17   5 -10   14.20   80.69
  15  -5 -10   38.00   16.70
  15   5 -10   29.90  111.29
 -13  -5  10  109.69   15.60
  13  -5 -10   64.69   19.20
  13  -5 -10  111.69   21.70
  13   5 -10  -34.40  122.49
  13   5 -10   98.89   11.70
  11  -5 -10   61.19   16.30
  11  -5 -10   63.59   17.50
 -11  -5  10   50.49   10.30
  11   5 -10   49.30    6.50
  11   5 -10   68.59  140.79
   9  -5 -10   58.09   14.30
   9  -5 -10   20.20   12.90
   9  -5 -10   65.49   14.00
  -9  -5  10   48.70   10.00
   9   5 -10   11.90  138.69
   7  -5 -10   26.60   10.50
  -7  -5  10   51.99   11.60
   7  -5 -10   52.59   11.80
   7  -5 -10   49.00   11.70
   7   5 -10   51.89  150.58
  -7   5  10   77.79   12.50
   5  -5 -10  296.87   33.50
   5  -5 -10  259.47   30.50
   5  -5 -10  245.48   31.60
  -5  -5  10  322.27   33.00
   5   5 -10   56.69  140.69
  -5   5  10  287.17   29.90
  -3  -5  10  136.19   19.80
   3  -5 -10  107.09   18.00
   3  -5 -10  145.29   16.10
  -3   5  10  -18.40  127.69
   3   5 -10   17.60  129.19
  -3   5  10   98.09   16.20
   1  -5 -10  110.09   14.90
  -1   5  10   75.59   13.60
  -1   5  10   55.89  129.79
  -1  -5 -10   84.59   12.50
   1   5  10   67.69   11.90
   1   5  10  -25.00  125.39
   3   5  10   49.60  120.39
   3   5  10   96.09   11.80
   5   5  10   -1.10  106.79
   7   5  10   -6.60   88.19
   9   5  10  -58.59   66.99
  12   6 -10    5.40   80.79
  10   6 -10    2.90   94.89
   8   6 -10  -46.60  101.09
   6   6 -10  -60.99  128.19
   4   6 -10   -2.60  110.39
   0   6  10  -85.79  146.89
   2   6  10    3.00   93.49
  28   0 -11   17.10    2.70
  26   0 -11  103.29    8.30
  22   0 -11   27.40    5.70
 -22   0  11  -10.90   21.70
  22   0 -11    6.00   15.30
  20   0 -11   17.40   12.40
  20   0 -11   16.60    3.50
  20   0 -11   24.30    5.50
  18   0 -11   41.50    5.00
  18   0 -11    7.70   16.90
  18   0 -11   57.99    7.40
  18   0 -11   40.10   12.70
  16   0 -11  135.09   19.50
  16   0 -11  132.69   10.10
  16   0 -11  134.29   23.30
  16   0 -11  136.29   11.80
  14   0 -11  327.97   35.50
  14   0 -11  374.06   24.90
  14   0 -11  335.37   38.30
 -12   0  11   41.60    8.80
  12   0 -11   49.30    4.60
  12   0 -11   37.20    9.90
  12   0 -11   58.79   11.80
  12   0 -11   48.40    5.90
  10   0 -11    4.40    4.80
  10   0 -11    5.30    1.90
  10   0 -11    6.10    2.70
  10   0 -11   12.10    6.90
   8   0 -11   98.99    9.20
   8   0 -11   99.89   10.10
   8   0 -11   75.59   10.90
   8   0 -11   82.99    6.70
   8   0 -11   80.79    7.70
   6   0 -11   23.70    5.60
   6   0 -11   29.40    3.60
   6   0 -11   31.30    5.30
   6   0 -11   34.00    4.70
   6   0 -11   35.10    6.10
   6   0 -11   31.50    4.30
   4   0 -11    1.90    2.20
   4   0 -11    1.30    1.70
   4   0 -11    0.20    2.30
   4   0 -11   -1.20    3.20
   4   0 -11    0.50    2.20
   2   0 -11  363.26   34.00
   2   0 -11  324.87   22.30
   2   0 -11  347.47   31.10
   2   0 -11  325.07   24.10
   0   0 -11  138.79   10.30
   0   0 -11  159.78   13.90
   0   0 -11  137.89   14.00
   0   0  11  140.69   11.60
   0   0 -11  144.59   16.20
   2   0  11  961.70   63.39
  -2   0 -11  951.10   84.29
  -2   0 -11  948.81   59.99
  -2   0 -11  946.21   90.89
  -2   0 -11  960.30   60.59
  -4   0 -11  277.67   26.80
  -4   0 -11  279.47   30.30
  -4   0 -11  299.47   23.50
   4   0  11  308.17   21.90
   6   0  11  182.38   15.20
   6   0  11  219.58   17.30
   6   0  11  223.18   16.20
  -6   0 -11  208.08   19.50
  -6   0 -11  218.98   24.10
  -6   0 -11  212.48   23.80
   8   0  11  108.89   11.20
   8   0  11  103.99    9.00
  -8   0 -11  113.69   14.90
   8   0  11   81.49   10.00
  -8   0 -11  101.19   15.70
 -10   0 -11  187.48   21.20
 -10   0 -11  182.48   22.30
  10   0  11  179.68   13.50
  10   0  11  189.38   15.50
  10   0  11  138.59   14.10
 -12   0 -11  356.36   39.90
  12   0  11  369.26   27.60
  12   0  11  398.16   25.80
  14   0  11    1.20    3.00
 -14   0 -11   -0.20    5.00
 -14   0 -11    4.90    5.60
 -16   0 -11   16.80    5.80
  27  -1 -11   25.00    3.40
  27   1 -11   26.50    3.60
  25  -1 -11  109.09    8.50
  25   1 -11  102.79    8.60
  23  -1 -11   71.59    9.00
  23  -1 -11   82.19    7.30
  23  -1 -11   70.29   21.60
  23   1 -11   86.19    7.80
  23   1 -11   75.39    9.40
  21  -1 -11  257.37   39.80
  21  -1 -11  294.57   20.10
  21  -1 -11  282.67   21.90
  21   1 -11  273.77   22.20
  21   1 -11  296.57   38.80
  21   1 -11  296.67   20.40
  19  -1 -11  228.08   31.60
  19  -1 -11  226.98   17.20
  19  -1 -11  204.88   15.20
  19   1 -11  188.18   30.20
  19   1 -11  221.58   17.60
  19   1 -11  207.98   15.60
  17  -1 -11   20.40   10.90
  17  -1 -11    5.10   16.80
  17  -1 -11    7.80    3.70
  17   1 -11    7.20    2.90
  17   1 -11    8.40    4.30
  17   1 -11    0.30    9.50
  17   1 -11    4.40    2.80
  15  -1 -11  378.66   42.10
 -15  -1  11  402.16   31.90
  15  -1 -11  396.26   27.30
  15   1 -11  342.97   41.90
  15   1 -11  392.46   26.10
 -15   1  11  289.47   41.80
  15   1 -11  417.26   40.20
  15   1 -11  408.16   27.80
  15   1 -11  421.16   25.90
  13  -1 -11  451.15   57.29
  13  -1 -11  571.04   51.39
 -13  -1  11  552.14   39.00
  13  -1 -11  452.65   52.09
  13   1 -11  624.14   50.89
  13   1 -11  528.45   35.90
  13   1 -11  532.45   33.70
  13   1 -11  491.55   52.99
  11  -1 -11  186.58   24.50
 -11  -1  11  243.88   21.00
  11  -1 -11  160.78   22.70
  11  -1 -11  199.88   20.50
  11   1 -11  244.48   23.40
 -11   1  11  133.69   22.00
  11   1 -11  209.78   15.00
  11   1 -11  168.68   23.50
  11   1 -11  195.88   13.50
   9  -1 -11  191.68   20.30
   9  -1 -11  182.28   18.30
   9  -1 -11  189.48   15.00
  -9  -1  11  203.28   19.90
   9  -1 -11  174.28   31.10
   9  -1 -11  205.08   22.80
   9   1 -11  193.98   14.80
   9   1 -11  155.58   22.30
   9   1 -11  231.38   18.60
  -9   1  11  189.08   22.20
   9   1 -11  179.88   13.40
   9   1 -11  211.68   22.20
   7  -1 -11  693.03   69.69
   7  -1 -11  689.13   64.49
   7  -1 -11  695.73   60.09
   7  -1 -11  641.44   42.30
   7  -1 -11  678.43   42.40
   7   1 -11  625.14   42.70
   7   1 -11  715.63   59.89
   7   1 -11  660.73   45.00
   5  -1 -11  633.34   39.40
   5  -1 -11  634.64   59.99
   5  -1 -11  641.94   39.90
   5  -1 -11  668.13   55.89
   5  -1 -11  614.94   64.39
   5   1 -11  566.24   54.79
   5   1 -11  616.04   41.70
   5   1 -11  613.64   39.70
   5   1 -11  625.74   40.70
   3  -1 -11  260.57   20.50
   3  -1 -11  280.17   29.80
   3  -1 -11  274.87   28.40
   3  -1 -11  288.87   18.60
   3  -1 -11  280.27   26.20
   3   1 -11  323.77   26.40
   3   1 -11  269.47   18.70
   3   1 -11  294.07   28.20
   3   1 -11  263.07   20.70
   3   1 -11  259.07   19.80
   1  -1 -11  416.16   41.70
   1  -1 -11  448.36   45.10
   1  -1 -11  449.76   29.70
  -1  -1  11  495.15   32.20
   1  -1 -11  463.45   31.80
   1   1 -11  525.65   42.00
   1   1 -11  491.05   45.50
   1   1 -11  437.06   29.70
   1   1 -11  425.56   31.00
  -1  -1 -11  453.15   47.60
  -1  -1 -11  462.95   34.00
   1  -1  11  416.86   57.99
  -1  -1 -11  424.26   44.00
   1  -1  11  500.75   34.00
  -1   1 -11  486.95   31.40
  -1   1 -11  569.74   44.30
  -1   1 -11  540.05   48.90
  -1   1 -11  499.95   33.30
  -3  -1 -11  403.06   39.60
  -3  -1 -11  384.16   29.60
  -3  -1 -11  357.56   36.20
   3  -1  11  450.05   50.39
   3  -1  11  407.06   28.60
   3   1  11  392.96   26.90
  -3   1 -11  383.66   25.80
  -3   1 -11  406.46   41.80
  -3   1 -11  370.56   28.10
  -3   1 -11  412.86   36.20
  -5  -1 -11   59.89   11.40
  -5  -1 -11   -6.00  105.49
  -5  -1 -11   69.99    8.90
  -5  -1 -11   73.99   11.20
  -5  -1 -11   70.09   10.10
   5  -1  11   59.09    7.70
   5  -1  11   68.09    9.10
  -5   1 -11   66.59    6.50
  -5   1 -11   80.89    9.30
   5   1  11   64.19    8.10
  -5   1 -11  106.69   18.00
  -5   1 -11   72.69   10.40
  -5   1 -11   77.09   12.90
   5   1  11   16.70   32.90
   7  -1  11   79.79   10.70
  -7  -1 -11   77.99   11.80
   7  -1  11   65.99    8.30
   7  -1  11   72.69    8.50
  -7  -1 -11   79.19   10.80
  -7   1 -11  112.59   19.50
  -7   1 -11   77.19   16.30
   7   1  11   75.79    8.90
   9  -1  11  124.99   14.90
  -9  -1 -11  157.78   18.40
   9  -1  11  154.48   12.80
  -9  -1 -11  158.78   19.20
   9   1  11  149.79   13.60
  -9   1 -11  183.48   22.90
  -9   1 -11  162.68   24.70
  11  -1  11   45.30    8.00
  11  -1  11   52.69    6.50
 -11  -1 -11   52.19    9.30
 -11  -1 -11   47.70    9.50
 -11   1 -11   35.40   12.10
 -11   1 -11   46.50   10.60
  11   1  11   51.59    7.50
  13  -1  11   78.49    7.60
  13  -1  11   61.29    8.70
 -13  -1 -11   76.49   10.50
 -13   1 -11   46.30   12.10
 -13   1 -11   95.39   14.30
  13   1  11   47.50    7.20
  15  -1  11   65.09    6.90
 -15   1 -11   79.29   12.30
  17  -1  11   24.70    3.80
 -17   1 -11   26.50    6.10
  26   2 -11    9.10    2.60
  24   2 -11  157.08   11.90
  22  -2 -11   65.09   21.20
  22   2 -11   75.19    7.40
  22   2 -11   72.69    9.40
  20  -2 -11   32.20   16.40
  20  -2 -11   19.30   22.00
  20   2 -11   34.10    6.40
  20   2 -11   33.60    5.30
  20   2 -11   29.30    4.60
  18  -2 -11   16.30   12.00
  18  -2 -11   -1.80   19.80
  16  -2 -11  143.69   28.00
  16  -2 -11  194.98   25.00
  16  -2 -11  172.68   26.30
  16  -2 -11  169.68   25.00
  16   2 -11  189.08   13.40
  16   2 -11  164.28   12.50
  16   2 -11  129.79   22.80
  16   2 -11  155.78   14.50
  14   2 -11   26.40   11.00
 -12  -2  11  330.87   27.30
  12  -2 -11  218.38   28.20
  12  -2 -11  268.87   27.10
  12  -2 -11  272.67   31.80
  12   2 -11  262.97   19.20
  12   2 -11  253.87   17.70
  12   2 -11  235.28   17.40
  12   2 -11  290.27   31.00
  12   2 -11  194.98   30.30
 -12   2  11  210.98   29.80
  10  -2 -11    5.20    2.70
  10  -2 -11    0.50    3.10
 -10  -2  11   12.20    8.60
  10  -2 -11    2.90    5.60
  10  -2 -11   -0.90    4.90
  10   2 -11    4.70    2.60
  10   2 -11   17.00   10.90
  10   2 -11    8.60    3.80
  10   2 -11   -1.70    5.20
 -10   2  11    8.30    6.50
   8  -2 -11  232.38   25.20
   8  -2 -11  234.58   22.90
   8  -2 -11  244.68   39.90
  -8  -2  11  228.28   25.70
  -8  -2  11  251.77   23.80
   8  -2 -11  236.78   27.30
   8   2 -11  254.87   30.20
   8   2 -11  249.78   16.80
   8   2 -11  244.98   18.20
   6  -2 -11  159.98   18.30
   6  -2 -11  135.39   30.30
  -6  -2  11  171.28   18.50
   6  -2 -11  149.09   17.10
   6  -2 -11  156.88   15.60
  -6  -2  11  134.49   17.30
   6   2 -11  132.59   17.00
   6   2 -11  164.08   11.50
   6   2 -11  155.68   12.40
   6   2 -11  164.88   23.50
   4  -2 -11  614.94   66.49
   4  -2 -11  653.23   61.79
   4  -2 -11  578.14   57.39
   4  -2 -11  685.53   41.40
   4   2 -11  624.94   43.00
   4   2 -11  635.14   40.80
  -4   2  11  721.53   41.30
   4   2 -11  595.14   59.89
   2  -2 -11   91.69   11.50
   2  -2 -11   66.99   10.00
   2  -2 -11   82.59   11.80
   2  -2 -11   87.59   10.20
   2   2 -11   97.39   11.10
   2   2 -11   78.49   12.90
   2   2 -11   85.29    7.30
  -2   2  11   92.69    8.20
   0  -2  11   65.99    8.10
   0  -2 -11   64.69    8.80
   0  -2 -11   75.29   11.00
   0  -2 -11   65.69    9.90
   0  -2 -11   65.09   10.30
   0   2 -11   63.39   11.60
   0   2 -11   64.99    9.80
   0   2  11   71.49    7.30
   0   2 -11   63.79    6.00
  -2  -2 -11   59.19    8.90
  -2  -2 -11   70.29   12.00
  -2  -2 -11   11.60   94.39
   2  -2  11   70.19    8.60
  -2  -2 -11   66.29   10.70
  -2  -2 -11   76.99   10.50
  -2  -2 -11   63.89    9.30
  -2   2 -11   72.59    6.60
  -2   2 -11   59.19    9.70
   2   2  11   74.59    8.10
  -2   2 -11   81.69   12.20
  -2   2 -11   63.19    6.10
   2   2  11   14.30   30.30
   4  -2  11   70.49    9.30
  -4  -2 -11   69.69   12.70
  -4  -2 -11   60.39  124.59
  -4  -2 -11   59.39   11.20
   4  -2  11   50.49    7.40
  -4  -2 -11   64.59    9.20
  -4  -2 -11   68.19    8.90
  -4  -2 -11   66.59   10.20
   4   2  11   70.29    8.50
   4   2  11  -21.10   32.80
  -4   2 -11   39.60   14.10
  -4   2 -11   83.39   11.50
  -6  -2 -11    0.90  120.99
   6  -2  11   82.39   10.90
  -6  -2 -11   73.39   11.30
   6  -2  11   61.89    8.50
  -6  -2 -11   70.99   12.40
  -6  -2 -11   90.59   10.80
  -6   2 -11   55.49   14.40
  -6   2 -11   86.99   11.20
   6   2  11   74.29    8.80
  -6   2 -11   69.09   16.80
   8  -2  11   15.70    6.30
   8  -2  11   22.70    5.70
  -8  -2 -11   -0.20  120.59
  -8  -2 -11   23.80    5.30
  -8  -2 -11   13.80    5.10
  -8   2 -11   29.70   14.60
   8   2  11   15.90    5.20
  -8   2 -11   29.20   11.60
 -10  -2 -11   59.69    8.90
 -10   2 -11   31.50   12.30
  12  -2  11   72.29    9.60
  12  -2  11   88.49    8.40
  12   2  11   69.89    8.50
 -12   2 -11   70.69   15.50
  14  -2  11   29.30    4.60
 -14   2 -11   37.40    9.30
  16  -2  11   -0.70    2.40
 -16   2 -11   -2.50    4.60
  23   3 -11   45.20    5.30
 -21  -3  11   62.29   12.40
  21  -3 -11   37.30   19.00
  21   3 -11   54.79    6.70
  21   3 -11   59.09    6.20
  21   3 -11   62.99    8.00
  19  -3 -11    6.50   14.90
 -19  -3  11   24.10    9.40
  19  -3 -11   15.70   20.60
  19  -3 -11   19.20   17.00
  19   3 -11   17.20    5.40
  19   3 -11   15.60    3.80
  19   3 -11   16.00    4.20
  17  -3 -11    8.00   12.50
  17  -3 -11   18.70   20.50
 -17  -3  11    3.80    7.80
  17  -3 -11   18.70   16.60
  17   3 -11    8.30    4.70
  17   3 -11   12.00    4.40
  17   3 -11   12.30    3.70
 -15  -3  11   66.69   12.50
  15  -3 -11   86.39   15.90
  15  -3 -11   64.09   20.50
  15  -3 -11   70.09   16.20
  15  -3 -11   65.89   14.30
  15   3 -11   74.19    9.50
  15   3 -11   69.29    8.20
  15   3 -11   71.69    7.20
  15   3 -11  -40.30  148.99
 -13  -3  11   13.70    7.30
  13  -3 -11    5.80   13.30
  13  -3 -11   21.00    8.90
  13  -3 -11    0.10    9.50
  13  -3 -11   11.20    8.50
  13   3 -11   13.80    4.00
  13   3 -11   24.60    4.00
  13   3 -11   18.50    5.60
  13   3 -11   78.49  175.58
  11  -3 -11   26.90    8.00
 -11  -3  11   22.00    7.70
  11  -3 -11   14.50   10.50
  11  -3 -11   21.60    7.30
  11  -3 -11   15.30    8.10
  11   3 -11   42.50    6.90
  11   3 -11   25.60    4.20
  11   3 -11   30.20    5.10
  11   3 -11  -37.80  157.98
 -11   3  11   36.10    7.70
   9  -3 -11   57.99    9.70
  -9  -3  11   69.19   15.00
  -9  -3  11   45.90    9.50
   9  -3 -11   49.10    9.50
   9  -3 -11   35.30   10.40
   9   3 -11   38.90   17.50
   9   3 -11   73.19    6.30
   9   3 -11   65.09    8.40
   9   3 -11    8.40  138.59
   9   3 -11   36.10   10.50
   9   3 -11   61.49    6.50
   7  -3 -11   76.89   13.90
   7  -3 -11   79.79   11.90
  -7  -3  11   89.19   13.50
  -7  -3  11  107.19   17.30
   7  -3 -11   79.49   10.70
   7  -3 -11   85.49   11.20
   7   3 -11   87.89    9.20
   7   3 -11   40.10  132.99
   7   3 -11   81.09    7.50
   7   3 -11   57.89   13.00
   7   3 -11   77.79    7.70
   7   3 -11   64.39   19.40
   5  -3 -11    2.50    3.50
  -5  -3  11    2.30    4.50
   5  -3 -11   15.00   98.39
   5  -3 -11    2.80    3.70
  -5  -3  11   -4.00    7.60
   5  -3 -11    3.10    3.30
   5  -3 -11   -6.50    4.20
   5   3 -11    0.40   15.00
   5   3 -11    1.00    2.50
   5   3 -11    8.60    8.90
   5   3 -11    1.80    2.70
   5   3 -11  -51.29  130.49
   5   3 -11    0.60    4.00
   3  -3 -11  211.78   22.70
  -3  -3  11  289.27   24.10
  -3  -3  11  201.28   22.70
   3  -3 -11  200.68   24.40
   3  -3 -11  213.28   22.80
   3  -3 -11  211.78   21.10
   3   3 -11  172.88   32.50
   3   3 -11  -28.80  131.39
   3   3 -11  202.98   14.70
   3   3 -11  206.18   14.70
   3   3 -11  161.78   23.70
   1  -3 -11   79.59   10.10
   1  -3 -11   57.59   11.70
   1  -3 -11   78.29   11.00
  -1  -3  11   76.69    9.20
   1  -3 -11   75.59   10.20
   1  -3 -11   80.89  126.39
   1   3 -11   28.80  128.19
   1   3 -11   69.49    7.00
  -1   3  11   79.69    8.00
   1   3 -11   67.19    6.80
   1   3 -11   57.99   13.00
  -1  -3 -11   35.90    7.30
  -1  -3 -11   14.60  114.59
  -1  -3 -11   38.40    9.80
  -1  -3 -11   42.10    7.90
  -1  -3 -11   32.30    8.00
  -1  -3 -11   23.20    6.10
   1  -3  11   32.80    6.70
  -1   3 -11   27.90    4.60
   1   3  11   41.00    6.20
  -1   3 -11   27.30   10.70
   3  -3  11   46.70    8.20
  -3  -3 -11   65.79    9.50
  -3  -3 -11   46.30   10.00
  -3  -3 -11   50.49    9.50
  -3  -3 -11   53.09    9.10
  -3  -3 -11   54.39  126.99
   3   3  11   61.59    7.90
  -3   3 -11   48.50   11.60
  -5  -3 -11   -4.10  134.79
   5  -3  11    9.50    4.70
  -5  -3 -11    7.80    4.30
   5  -3  11   -2.10    5.30
  -5  -3 -11    7.70    5.70
  -5   3 -11   -9.80   10.00
  -5   3 -11   -2.10   12.70
  -5   3 -11    8.50    7.80
   5   3  11   13.50    5.00
   7  -3  11   26.80    7.30
   7  -3  11   22.00    5.40
  -7  -3 -11   27.50    8.20
   7   3  11   19.00    5.30
  -7   3 -11    8.70   10.60
  -7   3 -11   13.40   14.30
   9  -3  11   59.59    8.00
   9  -3  11   59.39    9.20
   9   3  11   63.49  125.79
  -9   3 -11   63.09   13.40
   9   3  11   80.29    8.50
  11  -3  11   15.90    4.30
  11  -3  11   16.30    5.60
  11   3  11   30.80    5.60
  11   3  11   26.30  151.68
 -11   3 -11    7.40   12.20
 -11   3 -11   46.10   11.80
  13  -3  11   23.90    4.00
 -13   3 -11   31.90    9.50
  15  -3  11   12.10    2.50
 -15   3 -11   11.80    5.60
 -22   4  11  -14.60   11.00
  20  -4 -11   22.10   18.20
  18  -4 -11   67.29   21.20
  18  -4 -11   12.20   18.60
  18  -4 -11    9.90   14.70
 -18  -4  11   13.60    7.40
  18   4 -11  -32.80  102.59
  18   4 -11   15.90    4.10
  16  -4 -11   15.80   18.70
  16  -4 -11    8.60   13.60
 -16  -4  11   20.70    8.40
  16  -4 -11   62.99   21.10
  16   4 -11   15.00    4.30
  16   4 -11   26.00    4.10
  16   4 -11  -15.60  125.09
 -14  -4  11   98.39   17.10
  14  -4 -11   76.29   21.70
  14  -4 -11   94.19   18.60
  14  -4 -11   79.79   17.20
  14  -4 -11  115.79   22.10
  14   4 -11   33.00  138.09
  14   4 -11   95.39   13.20
  14   4 -11   96.99    9.30
  14   4 -11   97.49    8.60
  12  -4 -11   75.79   14.80
  12  -4 -11   88.09   19.10
 -12  -4  11   81.69   15.60
  12  -4 -11   50.69   15.90
  12  -4 -11   67.39   18.10
  12   4 -11   76.19    8.10
  12   4 -11  133.29  170.18
  12   4 -11   84.79   10.00
  12   4 -11   86.59    7.80
  10  -4 -11  -15.00    9.00
 -10  -4  11    7.80    6.60
  10  -4 -11    6.20    7.70
  10  -4 -11   -1.00   10.30
 -10   4  11   17.60    6.60
  10   4 -11   49.00  178.38
  10   4 -11    6.30    3.60
  10   4 -11   11.40    5.30
  10   4 -11   10.90    3.60
  10   4 -11   -7.50    8.70
   8  -4 -11  208.28   25.90
  -8  -4  11  234.78   26.30
   8  -4 -11  215.58   28.90
   8  -4 -11  203.78   26.50
   8   4 -11  -12.20  156.28
   8   4 -11  239.68   16.40
   8   4 -11  216.98   18.10
  -8   4  11  260.07   25.30
   8   4 -11  205.98   16.30
   6  -4 -11    7.40    7.40
   6  -4 -11   22.60    7.20
  -6  -4  11   23.20    7.50
   6  -4 -11   12.90    6.50
   6   4 -11   17.10   11.00
  -6   4  11   19.60    8.10
   6   4 -11   21.50    4.20
   6   4 -11   18.80    4.10
   6   4 -11   49.99  149.69
   4  -4 -11  253.07   25.90
   4  -4 -11  215.98   27.90
  -4  -4  11  195.58   17.90
  -4  -4  11  220.18   25.50
   4  -4 -11  220.98   25.30
   4   4 -11  -10.40  152.58
   4   4 -11  233.18   16.30
  -4   4  11  204.08   24.40
   2  -4 -11   29.00    8.50
  -2  -4  11   28.60    6.30
  -2  -4  11   34.00    7.60
   2  -4 -11   27.20    6.90
   2  -4 -11   30.00    6.40
   2   4 -11   16.90   11.10
   2   4 -11   34.20    5.20
  -2   4  11   31.40    8.50
   2   4 -11  -55.79  130.59
   0  -4  11   27.40    6.50
   0  -4 -11   26.50    8.50
   0  -4 -11   48.70    8.70
   0  -4 -11   28.10    6.80
   0   4 -11   25.70   11.70
   0   4  11   39.30    9.30
   2  -4  11    7.00    5.30
  -2  -4 -11   26.30    7.60
   2   4  11   32.70    8.40
  -2   4 -11   20.70   10.30
   4  -4  11   52.39    8.60
   4  -4  11   38.20    6.20
  -4   4 -11   51.69   10.90
   4   4  11  -50.49  132.09
   6  -4  11    9.40    4.10
   6  -4  11   11.70    5.50
   6   4  11  -64.39  116.99
   8   4  11   19.00  120.09
  10  -4  11    8.70    3.20
 -10   4 -11    8.40    9.10
  10   4  11  -16.40   81.99
  17  -5 -11    9.80   11.90
  17   5 -11  -60.49   75.69
  15  -5 -11   33.10   15.50
  15   5 -11  -41.70   95.89
  13   5 -11  -52.19  125.39
  11  -5 -11    4.30   14.20
  11  -5 -11   19.60   12.70
 -11  -5  11   23.20    7.80
  11   5 -11   18.80    4.20
  11   5 -11   55.79  148.99
   9  -5 -11  236.28   30.10
   9  -5 -11  189.48   27.30
   9   5 -11   89.19  145.09
   7  -5 -11    9.10    7.60
   7  -5 -11   14.70    9.00
   7  -5 -11   29.60    9.50
  -7  -5  11   27.60    9.40
   7   5 -11   19.40  144.89
  -7   5  11   33.90    8.80
   7   5 -11   -4.20    9.00
   5  -5 -11   72.19   13.90
   5  -5 -11   42.50    9.70
   5   5 -11   71.19  149.88
  -5   5  11   47.40   10.60
   3  -5 -11   68.99   12.10
   3   5 -11   13.80   10.40
  -3   5  11   31.40  130.09
   3   5 -11  -10.20  114.99
  -3   5  11   44.30    9.90
   1  -5 -11   53.09   10.30
  -1   5  11  -70.59  113.29
   1   5  11   11.20    5.20
   1   5  11   20.20  123.79
   3   5  11   29.00  115.99
   5   5  11  131.29  118.69
   7   5  11  -33.10   78.99
  10   6 -11   -6.70   86.99
   8   6 -11   45.40  100.29
   6   6 -11  -55.89  105.79
   0   6  11  -14.10   87.79
  28   0 -12  136.69   10.80
  26   0 -12   70.39    6.40
  24   0 -12   17.80    3.60
  24   0 -12   40.50   14.70
  24   0 -12   18.00    4.90
 -22   0  12  -32.60   20.30
  22   0 -12    9.40   14.40
  22   0 -12   14.10    4.80
  22   0 -12   12.40    3.40
  20   0 -12  190.18   13.80
  20   0 -12  187.78   15.80
  20   0 -12  162.78   26.50
  18   0 -12   13.10   17.40
  18   0 -12   29.20   12.60
  18   0 -12   32.70    5.80
  18   0 -12   33.90    4.30
  16   0 -12  391.16   26.10
  16   0 -12  341.67   40.40
  16   0 -12  363.26   24.40
  16   0 -12  321.87   37.10
  14   0 -12  169.08   22.10
  14   0 -12  176.68   25.20
  14   0 -12  202.08   14.80
  12   0 -12  216.28   27.80
  12   0 -12  256.97   17.80
  12   0 -12  233.48   16.00
 -12   0  12  254.07   21.30
  12   0 -12  238.08   25.60
  10   0 -12   40.50    4.30
  10   0 -12   30.20    8.90
  10   0 -12   46.60    5.60
  10   0 -12   48.70    5.70
  10   0 -12   55.19   10.30
   8   0 -12  270.67   20.00
   8   0 -12  214.48   24.50
   8   0 -12  261.57   18.50
   8   0 -12  288.27   24.10
   8   0 -12  255.27   17.20
   6   0 -12   33.50    3.90
   6   0 -12   39.00    7.10
   6   0 -12   29.70    5.80
   6   0 -12   37.60    5.20
   6   0 -12   33.00    4.40
   4   0 -12  916.81   57.89
   4   0 -12  871.11   60.89
   4   0 -12  976.40   81.99
   4   0 -12  910.01   58.19
   4   0 -12  960.40   87.99
   2   0 -12   51.29    7.90
  -2   0  12   -2.90   21.30
   2   0 -12   45.10    4.70
  -2   0  12   44.80    5.90
   2   0 -12   49.70    8.20
   2   0 -12   46.10    6.10
   0   0 -12 1594.54   99.89
   0   0  12 1678.93  107.39
   0   0 -12 1642.34  102.19
   0   0 -12 1673.93  154.28
   0   0 -12 1608.04  143.99
  -2   0 -12  933.71  104.39
  -2   0 -12 1077.99   97.29
  -2   0 -12 1137.09   69.39
   2   0  12 1190.38   73.29
  -2   0 -12 1203.38   70.19
  -4   0 -12    6.90    5.10
   4   0  12    1.00    4.40
  -4   0 -12    2.30    4.50
  -4   0 -12    0.40    2.60
  -4   0 -12   -5.00    4.30
   6   0  12   24.40    5.60
  -6   0 -12   23.90    7.80
   6   0  12   36.60    6.80
  -6   0 -12   21.40    6.40
   6   0  12   26.40    6.20
  -6   0 -12   28.60    8.10
  -8   0 -12  749.92   68.79
   8   0  12  678.93   44.60
  -8   0 -12  600.64   65.89
   8   0  12  584.54   44.00
   8   0  12  725.13   46.70
  10   0  12   15.40    5.00
 -10   0 -12   10.70    7.00
  10   0  12   17.40    4.10
 -10   0 -12   15.00    5.90
  10   0  12   18.70    5.60
 -12   0 -12    2.30    6.20
 -12   0 -12    4.50    5.10
  12   0  12   -0.10    3.10
 -14   0 -12   66.69   10.80
 -16   0 -12    5.20    5.60
  27  -1 -12   25.00    4.10
  27   1 -12   39.80    4.00
  25  -1 -12    7.30    2.50
  25   1 -12    3.70    2.60
  23  -1 -12   23.10    4.90
  23  -1 -12   19.40    3.50
  23  -1 -12    1.00   16.60
  23   1 -12   19.80    5.60
  23   1 -12   10.20    3.20
  21  -1 -12  181.58   13.80
  21  -1 -12  181.58   15.60
  21  -1 -12  169.98   27.80
  21   1 -12  232.18   32.50
  21   1 -12  192.08   14.10
  21   1 -12  186.08   16.10
  19  -1 -12  506.85   34.20
  19  -1 -12  522.65   35.40
  19  -1 -12  473.85   54.59
  19   1 -12  496.95   33.80
  19   1 -12  542.45   36.00
  19   1 -12  454.55   54.19
  17  -1 -12   44.40   19.10
  17  -1 -12   48.90    6.50
  17  -1 -12   48.90   12.60
  17   1 -12   42.70    5.30
  17   1 -12   47.00    5.80
  17   1 -12   32.90   12.10
  17   1 -12   55.99    7.60
  15  -1 -12   -7.90   11.80
  15  -1 -12    9.90    8.40
 -15  -1  12   -2.00    6.40
  15   1 -12   11.70    7.20
 -15   1  12    4.50    8.60
  15   1 -12    4.80    8.00
  15   1 -12    1.50    3.20
  15   1 -12   -0.30    2.20
  15   1 -12    0.80    2.20
  13  -1 -12  137.89   14.70
  13  -1 -12  102.59   19.20
 -13  -1  12  135.09   17.10
 -13   1  12   97.19   20.60
  13   1 -12   93.19   16.30
  13   1 -12  138.79   17.30
  13   1 -12  115.79   11.00
  13   1 -12  124.09    9.50
  11  -1 -12    6.40    6.10
 -11  -1  12    6.90    7.40
  11  -1 -12   10.90    3.50
  11  -1 -12    8.40    6.50
  11   1 -12    4.70    2.20
  11   1 -12   10.90    6.70
  11   1 -12   15.80    7.30
  11   1 -12    7.00    3.40
 -11   1  12    3.20    5.80
   9  -1 -12  206.58   25.00
  -9  -1  12  222.08   21.80
   9  -1 -12  232.58   34.10
   9  -1 -12  222.58   20.60
   9  -1 -12  225.68   22.70
   9  -1 -12  214.68   16.80
   9   1 -12  211.98   15.00
   9   1 -12  172.78   24.00
   9   1 -12  256.27   24.20
   9   1 -12  221.88   16.40
   7  -1 -12  278.67   20.00
   7  -1 -12  263.67   17.90
   7  -1 -12  276.07   25.40
   7  -1 -12  290.57   29.50
   7  -1 -12  261.67   27.60
   7   1 -12  263.27   19.60
   7   1 -12  251.87   18.30
   7   1 -12  258.17   20.90
   7   1 -12  311.07   27.50
   5  -1 -12  215.58   14.90
   5  -1 -12  218.58   21.00
   5  -1 -12  208.58   17.00
   5  -1 -12  219.98   23.00
   5   1 -12  202.98   16.20
   5   1 -12  256.67   21.30
   5   1 -12  228.88   18.20
   5   1 -12  207.98   15.10
   3  -1 -12  191.98   13.30
   3  -1 -12  179.98   18.50
   3  -1 -12  192.08   20.50
   3  -1 -12  192.98   16.20
   3   1 -12  193.38   20.20
   3   1 -12  188.18   13.40
   3   1 -12  224.98   18.90
   3   1 -12  171.28   16.00
   3   1 -12  177.58   14.40
   1  -1 -12  319.57   21.90
  -1  -1  12  348.67   24.20
   1  -1 -12  316.57   30.70
  -1  -1  12  280.47   43.30
   1  -1 -12  323.17   24.80
   1  -1 -12  313.37   33.30
   1   1 -12  329.97   22.00
   1   1 -12  284.27   23.90
   1   1 -12  385.16   30.90
   1   1 -12  354.16   33.60
  -1  -1 -12  484.15   35.60
  -1  -1 -12  473.75   46.10
   1  -1  12  530.25   35.70
  -1  -1 -12  512.25   49.99
   1  -1  12  584.34   61.49
  -1   1 -12  462.75   34.70
  -1   1 -12  521.95   50.69
  -1   1 -12  489.45   32.80
  -1   1 -12  532.05   46.10
  -3  -1 -12   12.10  111.19
   3  -1  12  207.88   16.70
  -3  -1 -12  182.98   19.30
  -3  -1 -12  196.78   19.00
  -3  -1 -12  202.68   21.80
  -3  -1 -12  178.08   21.20
  -3   1 -12  217.28   24.60
   3   1  12  198.48   15.30
  -3   1 -12  183.48   17.30
  -3   1 -12  179.88   23.60
  -3   1 -12  203.58   14.10
  -3   1 -12  213.78   19.60
  -5  -1 -12   53.99    9.90
   5  -1  12   52.69    8.60
  -5  -1 -12   55.49    8.10
  -5  -1 -12   58.59    9.00
  -5  -1 -12   72.49   12.30
   5  -1  12   59.29    7.50
  -5  -1 -12   -6.50  106.09
  -5   1 -12   57.09    9.90
   5   1  12   79.59   32.50
  -5   1 -12   61.59   12.50
  -5   1 -12   79.49   13.80
   5   1  12   49.50    7.20
  -5   1 -12   55.39    8.30
   7  -1  12  239.68   19.00
  -7  -1 -12  247.78   27.90
  -7  -1 -12  265.77   28.10
   7  -1  12  225.88   21.40
   7  -1  12  245.58   19.40
  -7   1 -12  291.57   30.60
  -7   1 -12  303.47   31.70
   7   1  12  266.97   19.90
  -9  -1 -12  160.88   19.40
   9  -1  12  153.88   15.90
   9  -1  12  157.58   13.50
  -9  -1 -12  169.38   20.50
   9   1  12  153.38   14.40
  -9   1 -12  199.68   24.90
  -9   1 -12  187.78   22.50
 -11  -1 -12   43.70    8.80
  11  -1  12   50.99    6.30
  11  -1  12   46.00    8.20
 -11  -1 -12   42.80    9.00
 -11   1 -12   31.80   10.20
 -11   1 -12   66.39   12.70
  11   1  12   41.10    6.80
  15  -1  12   11.80    3.40
 -15   1 -12   11.40    5.70
  26   2 -12    8.40    2.60
  24   2 -12   26.30    4.10
  22  -2 -12  -15.70   16.40
  22  -2 -12  -23.80   18.10
  22   2 -12    6.40    4.50
  22   2 -12    4.70    3.10
  20  -2 -12   97.09   21.00
  20   2 -12   89.99   11.00
  20   2 -12  104.29    9.20
  20   2 -12  102.79    9.40
  18  -2 -12   38.40   13.60
  18  -2 -12   42.10   21.80
  18  -2 -12   24.70   19.60
  18   2 -12   29.70    4.50
  18   2 -12   27.60    6.30
  18   2 -12   39.60    5.60
  18   2 -12   14.00   12.50
  16  -2 -12    9.90   10.00
  16  -2 -12   40.70   10.80
  16  -2 -12   16.90   10.30
  16  -2 -12   22.50   17.40
  16   2 -12   22.40    5.70
  16   2 -12   24.20    4.80
  16   2 -12    3.00   10.80
  16   2 -12   21.70    3.90
  14  -2 -12  612.34   71.39
 -14  -2  12  757.22   56.29
  14  -2 -12  630.94   79.59
  14  -2 -12  812.52   75.09
  14  -2 -12  746.33   71.89
  14   2 -12  762.32   50.09
  14   2 -12  883.61   70.99
  14   2 -12  897.51  234.98
  14   2 -12  719.03   48.20
  14   2 -12  786.62   47.40
  14   2 -12  636.04   73.09
  12  -2 -12   37.40   11.30
  12  -2 -12   50.49    8.80
 -12  -2  12   51.09   13.50
  12  -2 -12   40.30    9.60
  12   2 -12   17.60  130.79
  12   2 -12   45.40    5.30
  12   2 -12   38.10    6.20
  12   2 -12   73.59   15.70
  12   2 -12   36.60    5.20
  10  -2 -12   10.40    3.50
 -10  -2  12   18.40    9.60
  10  -2 -12   10.00    4.10
 -10  -2  12    6.50    5.80
  10  -2 -12    8.90    5.80
  10   2 -12   13.00    3.40
  10   2 -12   12.10    3.00
  10   2 -12   12.40    5.80
  10   2 -12   22.50   11.20
  10   2 -12   10.40    4.20
  -8  -2  12  435.86   45.10
  -8  -2  12  479.45   36.60
   8  -2 -12  442.26   41.80
   8  -2 -12  588.34   61.19
   8  -2 -12  472.25   49.00
   8  -2 -12  463.55   45.40
   8   2 -12  384.06   42.00
   8   2 -12  465.75   31.90
   8   2 -12  484.95   30.10
   8   2 -12  430.86   45.90
   6  -2 -12  325.57   34.40
   6  -2 -12  317.57   29.70
   6  -2 -12  318.07   32.20
  -6  -2  12  365.06   28.60
   6   2 -12  327.67   21.40
   6   2 -12  258.07   30.30
   6   2 -12  316.37   34.80
   6   2 -12  316.47   22.70
   4  -2 -12   30.00    5.80
   4  -2 -12   33.80    6.60
   4  -2 -12   26.90    5.90
   4  -2 -12   27.60    6.30
   4   2 -12   33.30    4.30
   4   2 -12   24.20    7.60
  -4   2  12   37.10    5.20
   4   2 -12   23.10    4.70
   2  -2 -12   21.20    5.40
   2  -2 -12   20.30    6.70
  -2  -2  12   18.40    4.90
   2  -2 -12   17.70    4.50
   2  -2 -12   13.60    4.40
  -2   2  12   25.20    4.60
   2   2 -12   19.50    6.10
   2   2 -12   18.40    3.50
   2   2 -12   28.00    7.70
   0  -2 -12  324.27   35.80
   0  -2 -12  317.87   34.00
   0  -2 -12  281.47  160.08
   0  -2 -12  335.57   33.60
   0  -2 -12  338.67   26.10
   0  -2 -12  319.37   30.90
   0  -2  12  338.97   24.50
   0   2 -12  311.47   22.20
   0   2  12  334.27   22.70
   0   2 -12  353.26   31.70
   0   2 -12  322.67   21.70
   0   2 -12  286.17   24.40
   0   2 -12  310.27   34.70
  -2  -2 -12  116.19   13.90
   2  -2  12  121.59   12.00
  -2  -2 -12  114.39   15.60
  -2  -2 -12   33.20  116.59
  -2  -2 -12  112.79   13.00
  -2  -2 -12  120.59   15.40
  -2  -2 -12  118.89   14.60
  -2   2 -12  109.29    8.90
  -2   2 -12  108.39    9.30
  -2   2 -12   95.49   18.50
  -2   2 -12  110.19   17.60
   2   2  12  115.99   10.70
   4  -2  12  499.55   34.60
  -4  -2 -12  489.95   48.60
  -4  -2 -12  459.55   43.70
  -4  -2 -12  513.25   47.50
  -4  -2 -12  423.86   50.69
  -4   2 -12  409.66   50.59
  -4   2 -12  508.85   50.39
   4   2  12  472.05   32.20
  -6  -2 -12  -12.50  111.09
   6  -2  12   53.29    9.50
  -6  -2 -12   66.89   10.70
  -6  -2 -12   61.49    9.40
   6  -2  12   37.30    6.80
   6   2  12   52.99    7.70
  -6   2 -12   61.49   12.40
  -6   2 -12   40.20   13.90
  -8  -2 -12    2.40  124.59
  -8  -2 -12  140.89   16.50
   8  -2  12  108.19   11.50
   8  -2  12  105.09   13.50
  -8  -2 -12  137.29   15.40
   8   2  12  118.89   12.00
  -8   2 -12  140.69   21.40
  -8   2 -12  101.99   19.90
  10  -2  12  108.89   12.90
  10  -2  12  107.79   10.40
 -10   2 -12  142.99   22.00
  10   2  12  104.19   11.00
  12  -2  12   88.19    8.60
  12  -2  12   87.09   10.50
 -12   2 -12   83.39   14.60
  12   2  12   90.89    9.10
  14  -2  12   51.99    5.90
 -14   2 -12   50.09   10.50
  16  -2  12    1.60    2.50
 -16   2 -12    2.40    4.20
  23   3 -12   21.30    3.70
  21  -3 -12  -27.20   16.50
 -21  -3  12   -6.00    6.60
  21  -3 -12  -24.70   17.00
  21   3 -12    1.90    3.00
  21   3 -12   -0.30    2.70
  21   3 -12    0.60    3.80
  19  -3 -12   38.50   18.20
 -19  -3  12   90.19   14.60
  19  -3 -12   49.00   17.40
  19  -3 -12   25.30   21.10
  19   3 -12   63.49    8.60
  19   3 -12   65.69    6.70
  19   3 -12   58.49    7.20
  17  -3 -12   41.80   16.80
  17  -3 -12   35.90   19.80
  17  -3 -12   40.50   14.20
 -17  -3  12   36.20   10.30
  17   3 -12   45.10    6.40
  17   3 -12   50.69    6.10
  17   3 -12   54.99    7.90
  15  -3 -12  594.94   62.69
  15  -3 -12  560.84   62.89
  15  -3 -12  632.04   65.59
 -15  -3  12  669.63   62.19
  15  -3 -12  541.85   71.89
  15   3 -12  623.94   41.00
  15   3 -12  626.24   40.50
  15   3 -12  201.18  189.18
  15   3 -12  647.74   43.10
  13  -3 -12  314.47   41.30
  13  -3 -12  304.67   35.80
  13  -3 -12  283.67   35.50
 -13  -3  12  321.77   35.00
  13  -3 -12  319.67   34.90
  13   3 -12  182.78  194.98
  13   3 -12  324.17   22.10
  13   3 -12  337.97   24.20
  13   3 -12  315.07   22.20
  11  -3 -12  186.48   23.10
  11  -3 -12  187.58   28.30
 -11  -3  12  206.38   24.30
  11  -3 -12  190.48   23.50
  11   3 -12  184.78   14.70
  11   3 -12  -78.49  143.99
  11   3 -12  214.38   16.70
 -11   3  12  205.68   21.10
  11   3 -12  198.68   14.60
  -9  -3  12  104.19   15.30
   9  -3 -12   87.09   13.30
   9  -3 -12   90.29   16.50
   9  -3 -12   88.79   12.80
   9   3 -12   92.29    8.10
   9   3 -12   93.29   10.30
   9   3 -12   57.09   18.70
   9   3 -12  100.59    8.80
   9   3 -12   73.69   13.40
   9   3 -12    1.50  139.69
  -7  -3  12  243.78   27.00
   7  -3 -12  222.68   24.10
   7  -3 -12  241.98   26.70
   7  -3 -12  237.28   26.80
  -7  -3  12  207.68   24.70
   7  -3 -12  246.28   29.20
   7   3 -12  263.97   17.40
   7   3 -12  248.68   17.50
   7   3 -12  218.38   33.30
   7   3 -12  262.17   19.40
   7   3 -12   69.89  156.88
   5  -3 -12   21.40   99.49
   5  -3 -12   33.20    8.50
  -5  -3  12   57.69   14.00
  -5  -3  12   53.99    9.20
   5  -3 -12   52.59    8.60
   5  -3 -12   52.29    9.70
   5  -3 -12   61.09    9.20
   5   3 -12   48.30  140.39
   5   3 -12   45.90    7.20
   5   3 -12   56.69    6.20
   5   3 -12   44.90    5.70
   5   3 -12   44.80   11.90
   3  -3 -12  522.65   50.89
   3  -3 -12 1345.77  279.77
   3  -3 -12  488.05   47.20
  -3  -3  12  512.95   39.90
   3  -3 -12  490.35   54.89
  -3  -3  12  512.75   36.20
   3  -3 -12  539.35   52.49
   3   3 -12  508.65   34.00
   3   3 -12  492.55   33.10
   3   3 -12   88.29  166.68
   1  -3 -12  203.58   22.10
   1  -3 -12  201.18   20.40
   1  -3 -12  168.08   23.30
  -1  -3  12  177.28   16.20
   1  -3 -12  200.98   21.60
   1  -3 -12  298.77  160.98
   1   3 -12 -115.79  123.79
   1   3 -12  161.98   22.60
   1   3 -12  185.78   14.50
  -1   3  12  216.68   15.30
   1   3 -12  198.08   14.30
  -1  -3 -12    1.10    3.70
   1  -3  12    3.50    4.80
  -1  -3 -12    4.30    5.00
  -1  -3 -12    7.30    4.60
  -1  -3 -12    3.40    3.50
  -1  -3 -12   70.49  131.99
   1   3  12    5.00    4.30
  -1   3 -12    4.80    3.60
  -1   3 -12   16.50    9.50
   3  -3  12  112.69   13.10
  -3  -3 -12  136.99   16.80
  -3  -3 -12  141.29   16.20
  -3  -3 -12  116.09   17.60
  -3  -3 -12  116.39   14.90
  -3  -3 -12   74.49  140.09
  -3   3 -12  140.89   17.90
   3   3  12  137.99   12.00
   5  -3  12   47.30    7.10
   5  -3  12   43.70    9.10
  -5  -3 -12  -75.39  128.49
  -5   3 -12   46.50   13.90
  -5   3 -12   66.99   12.70
   7  -3  12  112.49   15.00
   7  -3  12  127.89   13.10
  -7   3 -12  197.18   25.10
  -7   3 -12  192.68   24.00
   7   3  12  175.28   13.60
   9  -3  12    8.70    4.20
   9  -3  12    7.00    5.40
  -9   3 -12    1.00    9.20
   9   3  12    8.10    4.20
  -9   3 -12   -7.10    9.70
   9   3  12  -23.30  110.29
  11  -3  12   17.30    4.20
 -11   3 -12   42.80   10.70
  13  -3  12   15.50    3.30
 -13   3 -12   17.60    7.20
 -22   4  12    7.80   12.10
  20  -4 -12    6.50   17.50
  18  -4 -12    0.10   18.10
  18  -4 -12   42.30   19.80
  18   4 -12  -42.80   93.99
  16  -4 -12   76.39   17.70
  16  -4 -12   93.09   23.60
  16  -4 -12   98.99   23.30
 -16  -4  12  103.39   17.30
  16   4 -12   94.09    9.10
  16   4 -12  100.39    8.40
  16   4 -12   -1.00  131.69
  14  -4 -12   31.60   12.90
  14  -4 -12   40.40   17.70
 -14  -4  12   32.00    9.50
  14  -4 -12   35.40   16.20
  14   4 -12   54.89    7.60
  14   4 -12  -67.89  129.39
  14   4 -12   53.59    6.00
  14   4 -12   37.80    5.70
  12  -4 -12  216.68   28.60
  12  -4 -12  215.48   34.40
  12  -4 -12  170.68   32.20
 -12  -4  12  256.67   28.10
  12   4 -12  -17.20  155.08
  12   4 -12  257.07   17.00
  12   4 -12  219.38   17.10
  12   4 -12  250.57   18.90
 -10  -4  12  235.58   26.90
  10  -4 -12  224.78   31.80
  10  -4 -12  195.88   26.60
  10   4 -12  207.08   16.40
  10   4 -12  221.58   16.40
  10   4 -12  225.58   18.40
 -10   4  12  253.37   24.80
  10   4 -12   17.00  164.68
   8  -4 -12   76.19   12.90
   8  -4 -12   71.99   13.60
  -8  -4  12   78.69   14.70
   8  -4 -12   58.49   13.60
   8   4 -12   82.49    7.60
   8   4 -12   35.60  142.99
   8   4 -12   75.69    7.90
   8   4 -12   47.60   12.80
  -8   4  12   84.99   13.40
   6  -4 -12  150.88   19.80
   6  -4 -12  159.18   22.50
  -6  -4  12  134.99   14.10
   6  -4 -12  151.38   20.00
  -6  -4  12  170.08   20.60
   6   4 -12  174.88   12.50
   6   4 -12  174.28   12.60
   6   4 -12  -72.69  134.59
   6   4 -12  114.49   21.10
  -6   4  12  156.48   19.50
   4  -4 -12   52.79   11.20
   4  -4 -12   48.90   11.10
   4  -4 -12   77.29   12.00
  -4  -4  12   57.49    8.60
  -4  -4  12   58.29   10.30
   4   4 -12   61.29    6.80
   4   4 -12   44.50   12.90
   4   4 -12  -36.00  147.49
  -4   4  12   68.19   12.00
   2  -4 -12   37.50    7.80
   2  -4 -12   39.00    7.40
  -2  -4  12   31.90    6.60
   2  -4 -12   24.30    8.50
   2   4 -12  -26.80  140.09
  -2   4  12   41.60    9.70
   2   4 -12   25.40   11.20
   0  -4  12   20.40    6.00
   0  -4 -12   17.50    5.60
   0  -4 -12   16.20    5.10
   0  -4 -12   13.60    7.10
   0   4  12   13.00    6.90
   0   4 -12    5.70    9.60
  -2  -4 -12   57.59   10.50
  -2   4 -12   22.80   10.10
   2   4  12   40.10    9.30
   4  -4  12    1.00    5.10
  -4  -4 -12   22.30    6.70
   4  -4  12    6.30    4.40
   4   4  12   14.10    4.80
   4   4  12   -4.50  129.99
  -4   4 -12   -1.80    7.20
   6  -4  12    9.00    5.20
   6  -4  12    4.80    3.90
   6   4  12  -17.00  114.79
   6   4  12   10.30    4.30
   8  -4  12    6.30    3.50
   8   4  12   -3.20  102.29
  10   4  12  -26.10   72.29
  17  -5 -12    7.80   10.40
  17   5 -12   11.00   78.59
  15  -5 -12   21.10   13.50
  15   5 -12  -52.39   81.79
  13  -5 -12   32.60   15.80
  13   5 -12   25.70  123.59
 -11  -5  12    7.50    6.20
  11  -5 -12   21.30   11.60
  11  -5 -12    2.40   13.30
  11   5 -12   -3.70  121.19
   9  -5 -12  115.29   20.40
   9  -5 -12  104.29   18.50
   9   5 -12   79.89  145.99
   7  -5 -12  170.98   22.00
  -7  -5  12  153.68   20.80
   7  -5 -12  116.29   18.10
   7  -5 -12  108.09   18.30
  -7   5  12  146.69   17.80
   7   5 -12   77.49  138.59
   5  -5 -12   15.40    6.90
   5   5 -12   -9.20    8.10
  -5   5  12   10.60    6.70
   5   5 -12    5.80  116.99
   3  -5 -12   99.59   14.50
   3  -5 -12   86.89   13.50
   3   5 -12  -39.10  108.59
  -3   5  12   37.80  128.19
  -1   5  12   -0.40  119.09
  -1   5  12   29.50    7.40
   1   5  12    3.70  122.39
   3   5  12   -4.30  107.79
   5   5  12  -58.09   81.39
   7   5  12   10.10   75.89
  10   6 -12   10.80   85.29
   8   6 -12  -41.40   81.19
   6   6 -12   19.80   99.49
  26   0 -13   87.59    7.30
  24   0 -13   71.59    9.00
  24   0 -13  101.19   18.60
  24   0 -13   79.39    7.30
  22   0 -13   45.80    7.10
  22   0 -13   69.09   18.70
  22   0 -13   59.89    6.30
  20   0 -13  109.49    9.30
  20   0 -13  118.29   11.50
  20   0 -13  100.49   19.80
  18   0 -13    4.60    3.80
  18   0 -13    2.70   15.70
  18   0 -13    5.50   10.40
  18   0 -13    6.40    2.70
  16   0 -13   19.40    8.50
  16   0 -13    7.00    9.30
  16   0 -13   11.30    2.80
  16   0 -13   10.30    3.90
  16   0 -13   -5.40   13.70
  14   0 -13   85.89   14.10
  14   0 -13   78.89   14.20
  14   0 -13  103.19    9.10
  14   0 -13   85.69    8.60
 -12   0  13   37.40    9.20
  12   0 -13   29.40    9.10
  12   0 -13   50.79   10.90
  12   0 -13   31.10    4.00
  12   0 -13   47.70    6.00
  10   0 -13   75.19    6.60
  10   0 -13   86.49    7.90
  10   0 -13   69.09   11.30
  10   0 -13   85.69    8.90
   8   0 -13  111.99    9.00
   8   0 -13  119.59   12.50
   8   0 -13  116.59   10.00
   8   0 -13  136.09   12.50
   6   0 -13  426.06   29.90
   6   0 -13  405.86   29.50
   6   0 -13  474.05   39.40
   6   0 -13  419.46   28.00
   6   0 -13  435.46   42.40
   4   0 -13   -0.30    2.50
   4   0 -13    0.60    2.30
   4   0 -13    1.40    2.00
   4   0 -13    3.40    4.20
   4   0 -13    2.00    2.90
  -4   0  13  -22.40   16.30
   2   0 -13   42.60    4.70
   2   0 -13   35.40    5.70
   2   0 -13   37.70    7.40
  -2   0  13  -21.20   21.80
  -2   0  13   39.20    5.80
   2   0 -13   44.10    8.30
   0   0 -13   31.60    5.60
   0   0 -13   45.70    4.90
   0   0  13   35.20    5.70
   0   0  13   -6.70   22.10
   0   0 -13   23.60    6.00
  -2   0 -13  188.58   18.90
  -2   0 -13   22.00  111.29
  -2   0 -13  214.58   18.70
  -2   0 -13  199.88   14.20
   2   0  13  188.08   15.80
  -2   0 -13  195.18   21.90
  -2   0 -13  180.38   21.40
  -4   0 -13  162.98   17.00
  -4   0 -13  149.49   16.20
   4   0  13  161.28   13.70
  -4   0 -13  152.88   18.60
   4   0  13  171.78   14.80
  -4   0 -13   60.19  112.29
  -4   0 -13  164.58   19.40
   6   0  13   83.99   10.30
  -6   0 -13   74.19   12.80
  -6   0 -13   75.29   11.70
   6   0  13   74.19    9.50
  -8   0 -13  126.89   16.90
  -8   0 -13  134.69   15.70
   8   0  13   89.99   11.40
  10   0  13  288.07   21.00
 -10   0 -13  276.87   31.20
 -12   0 -13   98.99   16.40
 -12   0 -13  139.99   15.90
 -14   0 -13   22.70    5.90
  27   1 -13    7.10    2.30
  25  -1 -13    5.60    2.50
  25   1 -13    0.80    2.50
  23  -1 -13  -25.70   15.10
  23  -1 -13    1.90    2.40
  23   1 -13    0.20    4.10
  21  -1 -13   15.80   15.60
  21  -1 -13  -10.40   17.50
  21   1 -13   14.40    5.00
  21   1 -13   19.30    3.90
  21   1 -13   21.20   14.00
  19  -1 -13   37.70   20.60
  19  -1 -13   62.49   16.10
  19   1 -13   59.19   15.40
  19   1 -13   77.79    9.10
  19   1 -13   70.39    6.80
  17  -1 -13   94.19   25.40
  17  -1 -13  156.48   25.80
  17   1 -13  163.28   13.40
  17   1 -13  116.29   20.70
  17   1 -13  153.78   11.40
  17   1 -13  160.98   11.70
  15  -1 -13  138.69   23.60
 -15  -1  13  193.88   20.70
  15   1 -13  157.48   13.50
 -15   1  13  115.69   24.70
  15   1 -13  130.09   23.30
  15   1 -13  157.78   11.80
  15   1 -13  147.99   11.50
  15   1 -13  193.18   22.10
  13  -1 -13  633.54   57.39
  13  -1 -13  477.55   63.29
 -13  -1  13  734.63   45.50
  13  -1 -13  488.25   57.69
  13   1 -13  640.44   55.39
  13   1 -13  513.25   58.29
  13   1 -13  649.83   37.90
  13   1 -13  599.64   40.10
  13   1 -13  589.94   38.50
  11  -1 -13   87.89   10.20
 -11  -1  13  130.99   18.20
  11  -1 -13   95.29   16.00
  11  -1 -13   94.79   11.80
  11   1 -13   94.79    9.30
  11   1 -13   85.99    8.00
  11   1 -13  115.29   14.70
  11   1 -13   87.19   15.70
  -9  -1  13  127.99   17.80
   9  -1 -13  146.19   17.50
   9  -1 -13  130.29   13.70
   9  -1 -13  119.99   12.30
   9  -1 -13  134.69   10.00
   9  -1 -13  133.49   15.40
   9   1 -13  130.79   16.20
   9   1 -13  120.99   11.30
   9   1 -13  150.98   14.00
   9   1 -13  132.29   10.30
   7  -1 -13   51.99    8.20
   7  -1 -13   48.40    5.00
   7  -1 -13   50.59    6.90
   7  -1 -13   71.79    9.20
   7   1 -13   53.29    5.50
   7   1 -13   46.20    8.60
   7   1 -13   48.10    6.50
   7   1 -13   65.79    7.80
   5  -1 -13  117.09   12.30
   5  -1 -13  109.59    8.70
   5  -1 -13  106.09   13.70
   5  -1 -13  106.29   11.60
   5   1 -13  135.09   12.70
   5   1 -13  111.39   12.50
   5   1 -13  108.89    9.90
   5   1 -13  118.29    9.10
   3  -1 -13    5.30    3.50
   3  -1 -13    3.10    4.40
   3  -1 -13    2.60    2.50
   3  -1 -13    2.70    2.30
   3   1 -13    1.00    3.10
   3   1 -13   10.80    4.00
   3   1 -13    7.30    4.50
   3   1 -13    3.70    2.40
  -1  -1  13    7.00    4.10
   1  -1 -13    5.90    3.10
   1  -1 -13    6.90    3.80
   1  -1 -13    6.80    2.80
   1  -1 -13   11.70    6.00
   1   1 -13   11.30    4.20
   1   1 -13    3.70    4.10
  -1   1  13    0.80   27.60
   1   1 -13    7.70    2.80
   1   1 -13    2.50    4.60
  -1  -1 -13  250.57   26.10
  -1  -1 -13  247.98   21.60
  -1  -1 -13   85.29  122.89
   1  -1  13  271.67   19.60
  -1  -1 -13  224.18   23.60
  -1  -1 -13  226.58   26.00
  -1   1 -13  234.78   20.40
  -1   1 -13  226.18   26.90
  -1   1 -13  266.37   23.70
  -1   1 -13  258.47   17.40
  -1   1 -13  248.88   17.10
  -3  -1 -13  296.87   31.30
  -3  -1 -13  295.47   28.40
  -3  -1 -13  284.37   31.00
   3  -1  13  315.97   23.50
  -3  -1 -13  293.07   25.10
  -3  -1 -13   36.50  129.09
   3   1  13  274.67   21.40
  -3   1 -13  293.57   20.20
  -3   1 -13  320.47   28.30
  -3   1 -13  298.77   24.20
  -3   1 -13  291.27   32.70
  -3   1 -13  299.27   32.80
  -3   1 -13   68.09  164.28
  -5  -1 -13  527.35   54.99
  -5  -1 -13  524.85   49.20
  -5  -1 -13  483.75   53.09
   5  -1  13  435.96   38.20
   5   1  13  537.25   36.50
  -5   1 -13  587.64   49.10
  -5   1 -13  598.64   56.29
  -5   1 -13  581.94   54.99
   7  -1  13  103.09   10.90
  -7  -1 -13  120.39   14.60
   7  -1  13   90.39   10.80
  -7  -1 -13  116.69   15.80
   7  -1  13  108.69   13.30
  -7   1 -13  135.19   17.30
  -7   1 -13  144.29   19.60
   7   1  13  116.89   11.80
  -9  -1 -13  103.19   13.30
  -9  -1 -13   95.19   14.40
   9  -1  13   95.59   12.10
   9  -1  13   96.29    9.90
   9   1  13   77.29   10.50
  -9   1 -13  126.59   16.00
  -9   1 -13   99.49   18.00
  11  -1  13   75.29   10.10
 -11  -1 -13   68.59   11.40
 -11  -1 -13   67.29   10.40
  11  -1  13   72.69    7.70
 -11   1 -13   83.19   12.30
  11   1  13   64.19    8.40
 -11   1 -13   44.00   11.10
  13  -1  13   58.59    6.40
 -13  -1 -13   50.09    9.00
 -13   1 -13   60.39   10.70
  15  -1  13   14.30    3.50
 -15   1 -13   11.90    4.60
  26   2 -13   11.20    2.60
  24   2 -13   69.69    6.70
  22  -2 -13   -8.80   16.40
  22   2 -13    3.40    3.00
  22   2 -13    6.00    4.60
  20  -2 -13   10.60   20.00
  20  -2 -13   45.10   17.50
  20   2 -13   48.00    7.90
  20   2 -13   57.29    6.80
  20   2 -13   61.29    6.70
  18  -2 -13    7.80   12.10
  18  -2 -13    7.30   18.90
  18   2 -13    4.10    3.60
  18   2 -13   -2.00   11.00
  18   2 -13    4.60    3.20
  18   2 -13    7.10    4.70
  16  -2 -13   89.29   22.10
  16  -2 -13  128.99   18.40
  16  -2 -13   76.29   16.00
  16  -2 -13  101.79   18.70
  16   2 -13  115.59   11.70
  16   2 -13  116.19    9.50
  16   2 -13   93.29   18.40
  16   2 -13  128.59   10.30
  14  -2 -13  889.81   83.79
  14  -2 -13  740.13   92.29
  14  -2 -13  965.60   87.69
  14  -2 -13  715.43   83.39
  14   2 -13  847.82   56.39
  14   2 -13  910.21   58.49
  14   2 -13  923.71   55.39
  14   2 -13  935.61  250.57
  12  -2 -13  320.97   40.20
  12  -2 -13  326.77   35.50
  12  -2 -13  365.36   36.40
 -12  -2  13  347.77   31.70
  12   2 -13  335.87   23.50
  12   2 -13  320.77   23.50
  12   2 -13  350.46   25.50
  12   2 -13  399.46   37.80
  12   2 -13  362.96  184.38
  10  -2 -13  257.47   26.00
  10  -2 -13  272.87   28.90
  10  -2 -13  276.57   32.00
 -10  -2  13  261.47   29.40
 -10  -2  13  300.37   28.20
  10  -2 -13  287.07   29.30
  10   2 -13  300.47   31.80
  10   2 -13  271.07   19.10
  10   2 -13  276.27   20.70
  10   2 -13  255.97   19.00
  10   2 -13  194.58  165.68
   8  -2 -13   27.10    5.30
  -8  -2  13   22.20   10.20
   8  -2 -13   19.90    4.80
   8  -2 -13   16.00    5.80
  -8  -2  13   17.40    6.30
   8  -2 -13   18.00    5.20
   8   2 -13   21.90    4.80
   8   2 -13   31.10   12.30
   8   2 -13   23.90    4.20
   8   2 -13   83.19  128.99
   8   2 -13   28.00    4.00
   8   2 -13   24.90    7.00
  -6  -2  13   13.30    9.00
   6  -2 -13    8.00    3.90
   6  -2 -13   11.80    3.90
   6  -2 -13   10.50    4.30
   6  -2 -13   12.40    3.70
   6   2 -13   17.10    3.70
   6   2 -13   21.00    6.80
   6   2 -13   16.00    4.50
   6   2 -13   14.10    3.20
   6   2 -13   53.69  122.79
   4  -2 -13    5.20    3.70
   4  -2 -13    6.30    3.60
   4  -2 -13  -11.00   83.79
   4  -2 -13    4.30    3.40
   4  -2 -13    2.50    2.90
   4  -2 -13    8.40    5.20
   4   2 -13    6.80    4.00
   4   2 -13    6.40    2.50
   4   2 -13   11.60  119.99
   4   2 -13    5.20    2.70
   4   2 -13   12.70    6.90
  -4   2  13    8.20    3.80
   2  -2 -13   52.99    8.40
  -2  -2  13   69.69    9.00
   2  -2 -13   64.49    8.80
   2  -2 -13   64.29    9.80
   2  -2 -13   50.69    9.70
   2  -2 -13   93.19  108.49
   2  -2 -13   72.09   11.00
   2   2 -13   89.09   12.50
  -2   2  13   59.09    7.30
   2   2 -13   62.49    6.10
   2   2 -13 -115.99  105.79
   2   2 -13   49.20    5.90
   2   2 -13   44.90    9.10
   0  -2 -13   13.10  100.89
   0  -2  13   70.79    9.60
   0  -2 -13   76.59   10.90
   0  -2 -13   87.09   12.70
   0  -2 -13   73.69   10.20
   0  -2 -13   88.79   12.20
   0  -2 -13   81.49   12.00
   0   2  13   87.99    8.90
   0   2 -13   81.49    7.30
   0   2 -13   81.39    7.50
   0   2 -13  -22.60  106.29
   0   2 -13   81.69   11.80
   2  -2  13  173.98   16.40
  -2  -2 -13  192.98   19.70
  -2  -2 -13  180.58   21.10
  -2  -2 -13  182.48   21.60
  -2  -2 -13   94.29  125.99
  -2  -2 -13  190.48   22.70
  -2   2 -13  172.28   24.20
  -2   2 -13  195.28   14.10
   2   2  13  196.68   15.50
  -2   2 -13  206.88   23.40
  -2   2 -13  185.98   13.60
  -4  -2 -13  507.15   52.09
  -4  -2 -13  441.96   45.60
  -4  -2 -13   47.30  128.29
  -4  -2 -13  425.66   42.20
  -4  -2 -13  441.66   46.70
  -4   2 -13  475.35   48.60
  -4   2 -13  506.55   42.30
   4   2  13  439.36   31.30
  -4   2 -13  390.66   47.60
  -6  -2 -13   81.89   11.40
  -6  -2 -13  -24.40  118.29
   6  -2  13   63.49    8.40
  -6  -2 -13   88.59   12.70
   6  -2  13   59.89   10.90
  -6   2 -13   98.99   16.90
   6   2  13   76.29    9.80
  -6   2 -13   79.19   16.10
  -8  -2 -13   22.90  125.39
   8  -2  13   17.40    5.10
   8  -2  13   12.30    6.70
  -8  -2 -13   20.70    6.30
  -8  -2 -13   17.30    5.10
   8   2  13   12.90    5.10
  -8   2 -13   10.30   10.90
  -8   2 -13   22.60    9.00
  10  -2  13   -6.30    5.00
 -10  -2 -13    3.10    3.70
  10  -2  13   -0.20    3.70
 -10   2 -13    2.40    7.20
  10   2  13   -2.60    3.70
 -10   2 -13  -11.40    7.70
  12  -2  13    7.30    3.40
 -12   2 -13    4.00    6.40
  14  -2  13    3.30    2.80
 -14   2 -13   15.30    5.20
  23   3 -13    2.40    2.80
 -21  -3  13   74.49   13.20
  21   3 -13   79.39    9.50
  21   3 -13   87.39   11.30
  21   3 -13   76.99    7.30
 -17  -3  13  123.59   19.30
  17  -3 -13  111.99   19.70
  17  -3 -13   81.79   24.60
  17  -3 -13  105.79   19.30
  17   3 -13  109.69    9.50
  17   3 -13    3.10  133.19
  17   3 -13  102.29   11.50
  17   3 -13  107.59   10.10
  15  -3 -13  265.57   37.10
  15  -3 -13  259.17   42.80
  15  -3 -13  313.37   36.10
  15  -3 -13  307.27   37.70
 -15  -3  13  360.06   35.70
  15   3 -13  316.47   21.90
  15   3 -13  327.77   24.10
  15   3 -13   51.79  149.59
  15   3 -13  317.37   22.20
  13  -3 -13  112.79   17.40
  13  -3 -13   80.89   18.70
 -13  -3  13  115.69   18.10
  13  -3 -13   95.69   15.90
  13   3 -13  128.59    9.70
  13   3 -13  124.49   12.20
  13   3 -13   53.29  167.48
  13   3 -13  107.89   10.00
  11  -3 -13  456.75   49.10
  11  -3 -13  499.05   50.89
 -11  -3  13  492.95   49.30
  11  -3 -13  507.05   54.89
  11   3 -13   71.49  165.08
  11   3 -13  499.15   34.60
  11   3 -13  499.25   32.70
  11   3 -13  387.86   47.10
  11   3 -13  468.95   32.30
 -11   3  13  529.25   46.00
   9  -3 -13    4.80    5.00
   9  -3 -13    3.60    5.10
  -9  -3  13   12.10    6.60
   9  -3 -13   -3.10    7.30
   9   3 -13   10.90    4.90
   9   3 -13   11.20    8.60
   9   3 -13   12.20    3.80
   9   3 -13   15.40    3.90
   9   3 -13   13.30  134.29
  -7  -3  13  401.46   40.20
   7  -3 -13  392.16   40.40
   7  -3 -13  384.66   43.70
   7  -3 -13  377.26   37.00
   7  -3 -13  381.86   41.20
   7   3 -13  393.76   26.50
   7   3 -13  413.26   28.70
   7   3 -13  383.16   26.70
   7   3 -13   64.09  164.68
   5  -3 -13   36.90    7.90
   5  -3 -13   44.40    8.40
   5  -3 -13  139.79  135.29
   5  -3 -13   37.30    9.20
   5  -3 -13   44.90    8.10
   5   3 -13  -31.70  146.19
   5   3 -13   50.89   11.80
   5   3 -13   42.90    5.70
   5   3 -13   46.80    5.70
  -3  -3  13  257.47   20.80
   3  -3 -13  595.04  212.78
   3  -3 -13  268.67   28.20
   3  -3 -13  252.47   30.20
   3  -3 -13  271.17   28.30
   3  -3 -13  246.48   25.80
   3   3 -13  261.47   18.10
   3   3 -13  227.78   27.80
   3   3 -13   39.40  164.18
   3   3 -13  266.07   18.50
   1  -3 -13    8.30    4.50
   1  -3 -13    5.80    5.30
   1  -3 -13   47.10  127.59
  -1  -3  13    5.80    5.00
   1  -3 -13   10.10    4.90
   1  -3 -13    5.80    3.80
   1   3 -13    6.10    4.20
   1   3 -13  -21.20  126.59
   1   3 -13   14.30    9.20
   1   3 -13    8.10    3.70
  -1   3  13    7.00    4.50
  -1  -3 -13  272.57   27.50
  -1  -3 -13   48.70  133.79
  -1  -3 -13  300.27   30.30
   1  -3  13  233.78   21.80
  -1  -3 -13  253.77   32.00
  -1  -3 -13  287.97   30.10
  -1   3 -13  323.07   29.60
  -1   3 -13  272.57   19.60
   1   3  13  267.37   20.40
  -3  -3 -13  304.07   30.10
  -3  -3 -13  223.38   31.40
  -3  -3 -13   45.00  144.29
  -3  -3 -13  297.37   30.00
  -3  -3 -13  258.47   27.20
  -3   3 -13  332.17   28.60
   3   3  13  233.78   20.00
  -5  -3 -13   58.79    9.50
  -5  -3 -13   52.29   10.00
   5  -3  13   28.40    8.00
  -5  -3 -13   67.29  139.79
   5   3  13   46.40    7.40
  -5   3 -13   42.20   10.40
  -5   3 -13   39.60    8.50
   7  -3  13  117.49   11.30
   7  -3  13   94.89   13.20
  -7   3 -13  136.39   21.60
   7   3  13  142.69   11.70
   9  -3  13    2.20    4.70
   9  -3  13    2.40    3.60
  -9   3 -13   -3.30    8.10
  -9   3 -13   22.60    9.90
   9   3  13    7.40    3.90
   9   3  13  -28.70   96.69
  11  -3  13    1.10    3.20
 -11   3 -13   -5.90    6.80
  13  -3  13    8.90    2.50
 -13   3 -13   10.50    4.90
  20  -4 -13  -33.90   17.10
  20   4 -13    5.00    2.90
  18  -4 -13   51.09   20.50
  18   4 -13  -14.30  100.49
 -16  -4  13  202.08   23.10
  16  -4 -13  156.48   31.10
  16   4 -13  165.28   13.30
  16   4 -13   32.60  131.29
  16   4 -13  150.38   14.10
  16   4 -13  171.18   12.70
  14  -4 -13   40.30   17.40
  14  -4 -13   37.30   13.10
  14  -4 -13   37.80   16.10
 -14  -4  13   55.49   11.10
  14   4 -13   47.40    5.80
  14   4 -13   40.80    7.00
  14   4 -13    5.90  144.19
  14   4 -13   35.50    5.50
  12  -4 -13   68.79   16.80
 -12  -4  13   36.60    9.60
  12  -4 -13   41.60   11.20
  12   4 -13   56.59    6.50
  12   4 -13   52.69    6.80
  12   4 -13   62.39    8.40
  12   4 -13   42.60  155.78
  10  -4 -13   62.99   12.40
 -10  -4  13   68.39   12.00
  10  -4 -13   53.69   14.80
  10  -4 -13   45.00   11.70
  10   4 -13   79.89    9.80
  10   4 -13   70.29    7.40
  10   4 -13   82.59  161.48
 -10   4  13   91.09   13.40
  10   4 -13   74.69    7.70
  -8  -4  13  288.57   30.80
   8  -4 -13  250.57   30.10
   8  -4 -13  262.17   30.90
   8  -4 -13  265.97   34.70
  -8   4  13  258.87   29.20
   8   4 -13  -16.30  158.58
   8   4 -13  296.17   19.60
   8   4 -13  262.87   19.30
  -6  -4  13  186.68   21.40
   6  -4 -13  171.28   20.90
   6  -4 -13  157.48   23.90
  -6  -4  13  151.28   15.10
   6  -4 -13  162.58   20.40
   6   4 -13  175.58   13.00
  -6   4  13  126.59   20.20
   6   4 -13  181.58   13.00
   6   4 -13   -2.40  142.49
  -4  -4  13   20.50    6.40
   4  -4 -13   34.00    9.70
   4  -4 -13   31.60    7.60
   4  -4 -13   36.00    7.70
   4   4 -13   17.60   10.40
  -4   4  13   32.40    9.30
   4   4 -13   37.40    5.50
   4   4 -13   21.40  129.59
   2  -4 -13    7.00    4.70
   2  -4 -13   11.50    5.10
  -2  -4  13    4.90    4.90
   2  -4 -13   13.00    7.00
  -2   4  13   16.40    7.30
   2   4 -13    8.80    4.00
   2   4 -13  -31.10  121.19
   2   4 -13    3.80    9.60
   0  -4 -13  170.78   20.80
   0  -4 -13  194.98   20.80
   0  -4 -13  179.78   22.60
   0   4  13  179.28   20.80
   0   4 -13  128.89   20.70
  -2  -4 -13  156.58   19.80
  -2  -4 -13  174.68   18.60
   2   4  13  129.19   18.20
   4   4  13   67.89    7.80
  -4   4 -13   52.99    9.80
   4   4  13   13.70  128.39
   6  -4  13   24.60    4.80
   6   4  13   26.70  116.59
   8  -4  13    1.70    3.00
   8   4  13  -12.10   82.89
  10  -4  13   11.70    2.70
  17  -5 -13    0.30    9.20
  17   5 -13    1.90   76.69
  15  -5 -13   14.80   12.10
  15   5 -13  -49.30   87.39
  13  -5 -13    7.40   13.00
  13   5 -13   15.20  122.49
  11  -5 -13   12.30   12.50
  11   5 -13   -1.90  117.89
   9  -5 -13   23.90    9.30
  -9  -5  13   16.30   10.00
   9  -5 -13    1.40    8.30
   9   5 -13   64.29  130.19
   7  -5 -13  114.99   17.50
  -7  -5  13  187.38   21.00
   7  -5 -13  163.18   21.40
   7   5 -13    1.60  121.59
  -7   5  13  138.39   17.30
   5  -5 -13   20.90    7.60
  -5   5  13   21.60    7.10
   5   5 -13  -60.19  113.19
  -3   5  13   26.70    7.60
   3   5 -13  -27.90   97.49
  -3   5  13   -6.50  106.59
  -1   5  13  -30.40  107.99
   1   5  13    0.80  115.09
   3   5  13  -20.30  104.69
   5   5  13  -12.40   78.89
  26   0 -14   67.89    6.10
  24   0 -14   50.99   14.80
  22   0 -14  128.29   12.60
  22   0 -14  133.79   10.80
  22   0 -14  168.88   26.50
  20   0 -14  115.79   21.50
  20   0 -14  120.99   10.00
  20   0 -14  131.09   12.10
  18   0 -14   13.40   11.30
  18   0 -14   22.40    3.70
  18   0 -14   19.00    4.90
  16   0 -14  503.45   33.60
  16   0 -14  483.05   31.90
  16   0 -14  431.36   50.89
  14   0 -14   29.90    5.30
  14   0 -14   25.70    8.40
  14   0 -14   25.00    9.80
  14   0 -14   27.00    3.70
 -12   0  14    4.90    6.70
  12   0 -14    0.90    1.90
  12   0 -14    2.60    3.10
  10   0 -14    8.10    3.30
  10   0 -14    4.80    2.10
  10   0 -14    6.60    2.60
   8   0 -14   18.20    3.10
   8   0 -14   14.90    3.70
   8   0 -14   16.20    3.70
   8   0 -14   15.40    5.80
   6   0 -14  379.66   26.40
   6   0 -14  404.96   34.90
   6   0 -14  382.06   25.00
   6   0 -14  344.27   27.00
   6   0 -14  370.66   37.70
   4   0 -14  190.68   18.00
   4   0 -14  177.68   13.10
   4   0 -14  179.08   16.50
   4   0 -14  181.68   19.90
   2   0 -14  461.35   41.50
   2   0 -14  433.26   45.10
   2   0 -14  461.95   32.70
   2   0 -14  464.95   29.80
   0   0 -14    6.30    5.20
   0   0 -14   12.00    3.40
   0   0 -14   10.40    4.10
   0   0 -14    9.60    4.60
   0   0 -14   20.20  114.39
   0   0 -14    9.60    3.70
   0   0  14  -19.50   24.70
  -2   0 -14  730.83   62.99
  -2   0 -14  585.24   67.69
  -2   0 -14  700.63   70.89
  -2   0 -14  779.22   48.60
  -2   0 -14  728.73   45.10
  -4   0 -14    2.00    3.10
  -4   0 -14    2.90    4.30
  -4   0 -14    2.80    5.00
  -4   0 -14  -41.60  110.59
   4   0  14   -0.50    4.60
  -6   0 -14  146.19   20.40
  -6   0 -14  188.08   20.00
   6   0  14  158.18   14.40
   8   0  14  192.88   17.80
  -8   0 -14  258.27   25.90
  -8   0 -14  225.48   26.40
 -10   0 -14  265.77   29.40
  10   0  14  230.88   20.10
 -10   0 -14  296.17   29.40
 -12   0 -14   -0.90    4.10
 -14   0 -14   14.30    5.30
  27   1 -14    6.30    2.00
  25   1 -14   35.60    4.80
  21  -1 -14   -0.70   15.10
  21   1 -14   19.10    3.90
  21   1 -14   30.60   14.30
  21   1 -14   22.90    5.80
  19  -1 -14  197.78   33.00
  19   1 -14  197.78   14.20
  19   1 -14  169.28   30.80
  19   1 -14  181.98   16.10
  17  -1 -14  173.18   27.90
  17   1 -14  181.38   13.30
  17   1 -14  186.28   15.30
  17   1 -14  174.18   13.10
  17   1 -14  133.29   26.30
  15  -1 -14  252.57   34.00
 -15  -1  14  283.67   29.00
  15   1 -14  281.97   19.30
  15   1 -14  295.07   33.70
  15   1 -14  217.28   32.70
  15   1 -14  288.67   21.10
  15   1 -14  297.67   19.40
 -13  -1  14  437.16   35.10
  13   1 -14  367.96   43.10
  13   1 -14  404.06   27.80
  13   1 -14  411.76   29.40
  13   1 -14  426.76   41.10
  13   1 -14  438.66   27.50
  11  -1 -14   34.20    5.60
  11  -1 -14   27.60    5.80
  11  -1 -14   23.00    8.40
 -11  -1  14   34.00   11.30
  11   1 -14   31.90    4.30
  11   1 -14   28.30    4.30
  11   1 -14   27.70    7.70
  11   1 -14   34.00    5.80
  11   1 -14   25.10    4.90
  11   1 -14   40.30   10.80
   9  -1 -14  476.55   46.80
   9  -1 -14  483.75   43.30
   9  -1 -14  413.96   32.00
   9  -1 -14  451.75   30.40
   9   1 -14  535.15   43.20
   9   1 -14  467.65   31.00
   9   1 -14  465.35   32.90
   7  -1 -14   66.49   10.10
   7  -1 -14   67.59    8.80
   7  -1 -14   75.99   10.40
   7  -1 -14   61.59    6.10
   7   1 -14   71.79    7.90
   7   1 -14   86.79    9.20
   7   1 -14   70.79   10.90
   7   1 -14   73.09    6.70
   5  -1 -14  179.48   19.60
   5  -1 -14  175.28   17.60
   5  -1 -14  166.28   12.50
   5  -1 -14  160.28   15.50
   5   1 -14  167.38   14.00
   5   1 -14  187.58   17.70
   5   1 -14  157.78   16.10
   5   1 -14  181.38   12.80
   3  -1 -14  356.66  208.98
   3  -1 -14  130.69   14.30
   3  -1 -14  140.69   16.70
  -3  -1  14  153.78   13.10
   3  -1 -14  153.58   10.90
   3  -1 -14  136.29   14.80
   3   1 -14  134.79   10.90
   3   1 -14  126.39   16.00
   3   1 -14  110.59   13.90
   3   1 -14  164.98   15.10
   3   1 -14  158.48  191.08
   1  -1 -14  192.38   22.40
  -1  -1  14  224.98   17.40
   1  -1 -14  191.88   14.70
   1  -1 -14  219.28   19.20
   1  -1 -14  202.08   20.40
   1  -1 -14  169.78  138.99
   1  -1 -14  202.88   22.40
   1   1 -14   42.70  106.69
   1   1 -14  214.38   14.90
   1   1 -14  202.58   18.50
   1   1 -14  230.38   20.50
   1   1 -14  202.88   22.70
   1   1 -14  191.48   14.70
  -1  -1 -14  212.38  161.58
   1  -1  14  654.83   42.80
  -1  -1 -14  623.34   42.80
  -1  -1 -14  589.74   59.39
  -1  -1 -14  589.04   55.19
  -1  -1 -14  555.44   61.49
  -1   1 -14  579.14   61.89
  -1   1 -14  606.14   40.20
  -1   1 -14  573.04   59.69
  -1   1 -14  667.93   55.09
  -1   1 -14  614.54   39.20
  -1   1 -14  592.34   41.90
   1   1  14  668.63   40.90
   3  -1  14  192.88   19.60
  -3  -1 -14   22.20  103.79
  -3  -1 -14  238.28   23.20
  -3  -1 -14  224.38   25.20
  -3  -1 -14  233.98   25.50
  -3   1 -14  240.98   16.70
  -3   1 -14  255.37   23.10
   3   1  14  252.37   18.50
  -3   1 -14   61.99  116.39
  -3   1 -14  210.78   26.80
  -3   1 -14  241.58   26.70
  -5  -1 -14  342.87   34.70
   5  -1  14  299.57   26.00
  -5  -1 -14  340.87   31.50
   5  -1  14  277.37   23.60
  -5  -1 -14   68.29  122.19
  -5  -1 -14  318.37   34.30
   5  -1  14  295.57   23.50
  -5   1 -14  370.36   36.00
  -5   1 -14  348.67   36.00
   5   1  14  307.47   24.20
  -5   1 -14  361.06   31.30
  -7  -1 -14   -0.10    3.50
   7  -1  14   -1.20    5.80
   7  -1  14    2.80    4.40
  -7  -1 -14   -0.60    4.40
  -7   1 -14    2.40    6.90
   7   1  14    0.60    4.70
  -7   1 -14    2.10    5.60
  -9  -1 -14  249.38   23.60
   9  -1  14  205.78   16.10
  -9  -1 -14  202.28   23.70
   9  -1  14  183.68   17.90
  -9   1 -14  250.97   24.80
  -9   1 -14  172.98   25.10
   9   1  14  166.68   16.60
 -11  -1 -14   33.70    6.40
  11  -1  14   29.50    6.90
  11  -1  14   32.20    4.90
 -11   1 -14   20.20    7.50
 -11   1 -14   43.00    8.00
  11   1  14   28.50    5.90
 -13  -1 -14   45.90    8.00
  13  -1  14   34.80    5.00
 -13   1 -14   55.09    8.70
  26   2 -14   25.80    3.50
  24   2 -14   49.50    5.60
  22  -2 -14  -17.20   15.60
  22   2 -14    2.90    4.30
  22   2 -14    3.50    2.90
  20  -2 -14   39.40   17.80
  20  -2 -14   30.50   20.70
  20   2 -14   80.79    9.60
  20   2 -14   76.79    7.40
  20   2 -14   77.69    7.70
  18  -2 -14   80.09   18.00
  18  -2 -14   45.30   22.10
  18   2 -14   98.19   11.00
  18   2 -14  101.59    8.80
  18   2 -14  105.69    9.40
  16  -2 -14   22.50   16.60
  16  -2 -14   38.80    9.40
  16  -2 -14   25.10    9.60
  16  -2 -14   12.30   10.80
  16   2 -14   38.10    5.00
  16   2 -14   31.10    5.20
  16   2 -14   30.60    6.40
  14  -2 -14  437.16   46.10
  14  -2 -14  374.36   52.79
  14  -2 -14  500.35   47.70
  14   2 -14  434.76   30.50
  14   2 -14  496.75   30.60
  14   2 -14  444.96   32.50
  14   2 -14  317.57  185.58
 -12  -2  14  367.56   40.50
  12  -2 -14  368.66   39.80
  12  -2 -14  406.36   41.00
  12  -2 -14  359.66   44.90
  12   2 -14  396.46   26.50
  12   2 -14  513.05  216.28
  12   2 -14  388.26   28.40
  12   2 -14  372.06   26.50
  12   2 -14  481.65   41.60
  10  -2 -14  122.09   14.40
  10  -2 -14  130.09   16.60
  10  -2 -14  135.09   19.50
 -10  -2  14  170.68   23.30
 -10  -2  14  109.39   18.00
  10  -2 -14  150.18   16.40
  10   2 -14  126.29   10.60
  10   2 -14  146.49   12.70
  10   2 -14  129.19   11.00
  10   2 -14   45.20  138.79
  10   2 -14  171.58   15.80
   8  -2 -14  588.84   62.19
   8  -2 -14  611.34   60.09
   8  -2 -14  576.34   57.79
  -8  -2  14  631.34   45.90
   8  -2 -14  562.84   53.49
   8   2 -14  330.07  182.78
   8   2 -14  619.04   38.40
   8   2 -14  563.54   38.90
   8   2 -14  574.24   40.50
  -6  -2  14    3.90    8.90
   6  -2 -14   14.70    4.20
   6  -2 -14   13.80    4.60
   6  -2 -14   10.50    4.00
   6  -2 -14   26.10  110.29
   6  -2 -14    9.70    4.60
   6   2 -14    9.40    3.30
   6   2 -14    7.40    4.40
   6   2 -14   27.20  127.19
   6   2 -14    9.30    3.20
   6   2 -14   21.60    7.00
   4  -2 -14   38.70    7.00
   4  -2 -14  212.88  149.49
   4  -2 -14   46.00    8.00
   4  -2 -14   36.20    7.00
   4  -2 -14   30.20    7.10
   4  -2 -14   22.70    7.40
   4   2 -14   30.80    4.70
   4   2 -14   38.70    5.00
  -4   2  14   48.90    6.50
   4   2 -14    1.50  131.99
   2  -2 -14  151.18   18.10
   2  -2 -14   61.69  120.99
   2  -2 -14  143.59   16.40
   2  -2 -14  154.68   18.20
   2  -2 -14  152.68   17.40
  -2  -2  14  151.38   14.30
   2   2 -14  142.29   11.50
   2   2 -14  156.78   11.70
   2   2 -14   64.39  132.29
  -2   2  14  163.28   13.00
   2   2 -14  134.89   15.70
   0  -2 -14   98.79   13.80
   0  -2 -14  101.09   12.20
   0  -2 -14   33.50  102.49
   0  -2  14  100.29   11.30
   0  -2 -14   99.89   12.90
   0   2  14  105.59   10.20
   0   2 -14   95.49    8.90
   0   2 -14  100.89    8.50
   0   2 -14    8.20  127.29
  -2  -2 -14   20.00  114.99
   2  -2  14  197.18   17.90
  -2  -2 -14  191.18   20.50
  -2  -2 -14  191.98   22.40
  -2  -2 -14  199.78   22.10
   2   2  14  211.98   16.40
  -2   2 -14  173.98   14.00
  -2   2 -14  187.78   23.50
  -2   2 -14  236.78   21.30
  -2   2 -14  196.58   24.30
   4  -2  14   16.40    7.00
  -4  -2 -14    4.60  122.29
   4  -2  14   15.60    5.30
  -4  -2 -14   12.70    5.40
  -4  -2 -14   16.10    4.90
  -4  -2 -14   20.70    5.60
   4   2  14   27.30    6.30
  -4   2 -14   23.30    6.00
  -4   2 -14   21.90    7.90
  -4   2 -14   20.60    9.50
  -6  -2 -14    9.40    5.30
  -6  -2 -14    9.30    4.40
   6  -2  14   12.00    5.20
   6  -2  14    2.10    6.40
  -6  -2 -14    7.20  128.59
  -6   2 -14   16.60    7.70
  -6   2 -14   24.30   10.20
   6   2  14   10.20    5.10
   8  -2  14   19.60    5.20
  -8  -2 -14   26.30    5.80
  -8  -2 -14  -11.60  103.99
  -8  -2 -14   24.90    6.30
   8  -2  14   23.60    7.10
  -8   2 -14   16.80    7.40
  -8   2 -14    9.90    8.90
   8   2  14   17.20    5.40
 -10  -2 -14    4.40    3.90
  10  -2  14    0.20    3.80
  10  -2  14    0.00    4.50
  10   2  14    0.30    3.70
 -10   2 -14   -0.90    5.90
 -10   2 -14    0.40    6.40
  12  -2  14   19.50    4.00
 -12   2 -14   23.80    6.40
  23   3 -14    8.30    3.20
  19  -3 -14   -5.80   18.00
 -19  -3  14   11.00    8.40
  19  -3 -14   -2.60   14.50
  19  -3 -14  -21.30   14.60
  19   3 -14    5.70    3.30
  19   3 -14   14.40    5.10
  19   3 -14   13.90    3.50
  17  -3 -14  236.78   41.40
 -17  -3  14  350.66   35.20
  17  -3 -14  275.67   39.00
  17  -3 -14  223.08   43.10
  17   3 -14  309.07   21.70
  17   3 -14  154.78  160.88
  17   3 -14  328.97   23.70
  17   3 -14  327.97   21.50
  15  -3 -14  164.78   35.20
  15  -3 -14  180.68   25.60
  15  -3 -14  177.08   27.20
 -15  -3  14  206.98   25.50
  15   3 -14  203.58   15.20
  15   3 -14  200.68   17.00
  15   3 -14  205.48   14.80
  15   3 -14   42.00  158.58
  13  -3 -14  662.33   67.59
 -13  -3  14  701.13   67.39
  13  -3 -14  629.64   75.09
  13  -3 -14  686.33   70.49
  13   3 -14  249.18  209.88
  13   3 -14  711.73   47.30
  13   3 -14  705.83   45.20
  13   3 -14  656.83   44.30
  11  -3 -14   87.69   14.90
 -11  -3  14   96.59   16.40
  11  -3 -14   80.59   14.80
  11   3 -14  110.89    9.30
  11   3 -14   -3.50  159.68
  11   3 -14  119.19   11.70
  11   3 -14  101.79    9.40
  11   3 -14  102.89   14.50
   9  -3 -14  244.48   31.20
   9  -3 -14  244.88   28.00
  -9  -3  14  258.67   28.70
   9  -3 -14  232.38   25.20
   9  -3 -14  231.18   28.10
   9   3 -14  268.87   18.40
   9   3 -14  242.78   18.30
   9   3 -14  276.27   20.40
   9   3 -14   59.09  171.88
   9   3 -14  291.57   27.20
   7  -3 -14  291.27   34.40
   7  -3 -14  298.37   31.70
   7  -3 -14  288.87   31.80
   7  -3 -14  280.67   28.90
   7  -3 -14  372.86  156.18
   7   3 -14  291.97   30.30
   7   3 -14  291.87   20.70
   7   3 -14  298.57   22.70
   7   3 -14  136.29  173.18
   7   3 -14  304.37   20.80
   5  -3 -14  385.66   39.50
   5  -3 -14  298.17  156.58
   5  -3 -14  369.76   36.40
   5  -3 -14  381.76   42.30
  -5  -3  14  369.76   28.60
   5  -3 -14  383.66   40.20
   5   3 -14  380.56   26.00
   5   3 -14  369.96   37.50
   5   3 -14   88.19  175.68
   5   3 -14  384.86   25.70
   3  -3 -14   62.59  121.19
   3  -3 -14  140.59   17.30
   3  -3 -14  157.38   18.30
   3  -3 -14  122.79   16.00
  -3  -3  14  133.79   14.20
   3  -3 -14  151.58   19.40
   3   3 -14  137.09   11.20
   3   3 -14  179.38   20.30
   3   3 -14   35.90  135.59
   3   3 -14  145.69   11.50
  -1  -3  14    4.40    5.10
   1  -3 -14    0.30    3.50
   1  -3 -14   10.40    5.50
   1  -3 -14  -14.50  118.89
   1  -3 -14    5.70    4.40
   1  -3 -14    0.20    4.00
   1   3 -14    4.30    3.50
  -1   3  14    5.60    4.50
   1   3 -14   19.00    8.90
   1   3 -14    0.30  129.49
  -1  -3 -14   75.59   12.10
  -1  -3 -14   76.99   11.10
   1  -3  14   45.30    9.00
  -1  -3 -14  -34.10  124.69
  -1  -3 -14   86.99   13.00
  -1  -3 -14   65.19   10.60
  -1   3 -14   93.79   13.70
   1   3  14   68.59    8.80
   3  -3  14   13.10    6.70
  -3  -3 -14  -23.60  135.09
  -3  -3 -14   30.40    6.30
  -3  -3 -14   31.40    7.20
  -3  -3 -14   37.10    7.40
   3  -3  14   18.30    5.70
  -3   3 -14   44.70    8.60
   3   3  14   40.10    6.70
  -5  -3 -14   53.49  132.09
   7  -3  14   30.00    5.60
  -7   3 -14   56.19   10.00
   7   3  14   47.40    6.80
   9  -3  14    1.90    3.40
   9   3  14   48.50  100.09
  -9   3 -14    9.40    7.20
  11  -3  14   10.60    3.10
 -11   3 -14   21.60    5.90
  20   4 -14   10.90    3.60
  18  -4 -14   54.79   20.60
  18   4 -14   82.59    7.30
  18   4 -14   38.20  102.09
  16  -4 -14  200.58   33.40
  16   4 -14  202.08   15.60
  16   4 -14  222.48   17.10
  16   4 -14  216.18   15.30
  16   4 -14   41.10  133.29
  14  -4 -14  -14.00   13.20
  14  -4 -14    6.60   10.60
 -14  -4  14   16.90    8.00
  14  -4 -14   25.40   15.30
  14   4 -14   13.50    3.90
  14   4 -14  -24.90  126.79
  14   4 -14   14.40    5.20
  12  -4 -14   89.19   17.90
  12  -4 -14  123.99   25.60
 -12  -4  14  137.39   19.80
  12  -4 -14  111.29   18.70
  12   4 -14  137.19   10.50
  12   4 -14  126.39   12.30
  12   4 -14  129.79   10.70
  12   4 -14  -47.00  142.79
  10  -4 -14   59.29   14.00
  10  -4 -14   33.80   10.70
 -10  -4  14   76.79   12.60
  10  -4 -14   50.89   10.80
  10   4 -14   66.49    7.00
  10   4 -14   18.60  143.49
  10   4 -14   52.49    6.80
 -10   4  14   80.59   12.20
  10   4 -14   44.30   10.30
   8  -4 -14   65.39   13.70
   8  -4 -14   67.29   12.50
  -8  -4  14   63.99    9.20
   8  -4 -14   53.79   11.00
   8   4 -14   83.79    7.70
   8   4 -14  -57.79  136.49
  -8   4  14   89.99   14.50
   8   4 -14   78.79    7.60
   8   4 -14   52.49   11.90
  -6  -4  14   11.80    5.50
   6  -4 -14   21.70    6.50
   6  -4 -14    7.40    5.60
   6  -4 -14   33.20    9.70
   6   4 -14   45.70  152.58
   6   4 -14   22.40    4.50
  -6   4  14   11.40    7.90
   6   4 -14   19.00    9.50
   6   4 -14   18.10    4.00
   4  -4 -14  206.48   23.50
   4  -4 -14  193.58   23.30
   4  -4 -14  235.98   25.70
   4   4 -14  162.38   23.00
   4   4 -14  195.48   15.00
   4   4 -14  -11.70  128.99
   2  -4 -14  172.58   19.40
   2  -4 -14  153.68   18.80
   2  -4 -14  176.98   20.80
   2   4 -14   -4.90  122.89
   2   4 -14  136.09   12.10
  -2   4  14  148.39   19.40
   2   4 -14  125.09   19.20
   0  -4 -14  253.17   24.10
   0  -4 -14  206.68   24.10
   0   4  14  197.38   23.60
   0   4 -14  190.38   23.30
  -2  -4 -14   82.99   11.40
   2   4  14   28.60  131.09
   4  -4  14    3.00    4.00
   4  -4  14    0.80    5.70
   4   4  14   19.90  120.79
   6  -4  14   14.50    3.90
   6   4  14   26.20  104.29
   8  -4  14    1.00    2.70
   8   4  14  -28.50   80.49
  17  -5 -14    9.00    8.80
  15  -5 -14   17.80   11.10
  15   5 -14  -11.70   88.79
  13  -5 -14   10.00   11.40
  13   5 -14   -1.60  105.59
  11  -5 -14   24.00   11.60
  11   5 -14   22.50  118.69
   9   5 -14   40.70  120.59
   7  -5 -14    8.60    8.50
   7   5 -14  -16.60  123.49
   5  -5 -14   69.49   13.90
   5   5 -14   56.99  116.99
   3   5 -14   35.20  111.19
  -3   5  14  -28.80  127.69
  -1   5  14   -6.50  119.69
   1   5  14    8.00  118.09
   3   5  14   -2.50   88.79
   5   5  14   -3.40   67.69
  26   0 -15   13.70    2.60
  24   0 -15   14.90    3.30
  22   0 -15    3.90    2.80
  22   0 -15    0.50    3.80
  22   0 -15   12.70   15.20
  20   0 -15  608.34   68.99
  20   0 -15  655.73   45.00
  20   0 -15  668.23   43.10
  18   0 -15   31.20   12.20
  18   0 -15   34.30    4.60
  18   0 -15   39.90    6.50
  16   0 -15    2.60    2.70
  16   0 -15    1.00    9.10
  16   0 -15    3.20    3.70
  14   0 -15    6.10    3.60
  14   0 -15    1.40    2.50
  14   0 -15    0.20    7.70
  14   0 -15    3.60    2.70
  12   0 -15   12.00    2.80
  12   0 -15   13.60    4.20
 -12   0  15   10.50    7.70
  10   0 -15    0.40    2.10
  10   0 -15    0.70    3.00
  10   0 -15    1.30    1.90
   8   0 -15   21.30    6.60
   8   0 -15   40.30    4.70
   8   0 -15   32.90    5.70
   8   0 -15   40.00    5.50
   6   0 -15   15.10    3.90
   6   0 -15   16.40    3.30
   6   0 -15   10.00    3.80
  -6   0  15  -16.00   18.50
   6   0 -15   10.00    3.70
   6   0 -15   17.80    6.10
   6   0 -15   40.80  109.29
   4   0 -15    1.60  107.49
  -4   0  15  -31.40   21.40
   4   0 -15    4.90    5.10
   4   0 -15    6.60    3.20
   4   0 -15    3.80    3.50
   4   0 -15    9.50    3.00
   2   0 -15  624.84   39.40
   2   0 -15  600.74   61.89
   2   0 -15  628.34   59.69
   2   0 -15  254.47  152.18
   2   0 -15  585.54   42.00
   2   0 -15  613.44   54.99
   0   0 -15  703.43   69.29
   0   0 -15  757.82   46.00
   0   0 -15  699.03   72.09
   0   0 -15  682.03   48.40
   0   0 -15  704.53   64.09
  -2   0 -15  -38.30  108.69
  -4   0 -15   62.79   12.50
  -4   0 -15   75.99   11.30
   4   0  15   90.89   10.70
  -4   0 -15   19.50  120.39
  -4   0 -15   81.39   10.00
  -6   0 -15   23.70    7.20
   6   0  15   28.10    6.90
  -6   0 -15   34.30    6.80
   8   0  15   14.20    5.40
  -8   0 -15   15.10    6.40
  -8   0 -15   19.80    5.50
 -10   0 -15   21.10    6.60
 -10   0 -15   23.70    5.70
 -12   0 -15   17.50    5.20
  27   1 -15    0.20    1.80
  25   1 -15   38.60    4.70
  23  -1 -15  128.89   22.90
  23   1 -15  118.19   11.80
  23   1 -15  120.49    9.90
  21  -1 -15  123.39   22.80
  21   1 -15  119.29   12.30
  21   1 -15  121.49   10.30
  21   1 -15  158.88   27.30
  19  -1 -15  131.09   22.30
  19   1 -15  153.38   13.20
  19   1 -15  139.09   23.60
  19   1 -15  131.89   11.00
  17  -1 -15  142.59   22.40
  17   1 -15  158.48   14.20
  17   1 -15  163.88   12.30
  17   1 -15  165.48   12.20
  17   1 -15  120.79   24.90
  15  -1 -15   21.50   14.40
  15  -1 -15   -5.40   14.70
  15   1 -15    7.30    9.10
  15   1 -15   34.50    4.90
  15   1 -15   26.20    5.60
  15   1 -15   26.70    4.10
 -13  -1  15   33.70   11.90
  13   1 -15   28.30    5.60
  13   1 -15   31.30  104.89
  13   1 -15   38.50    5.00
  13   1 -15   36.10    4.60
  13   1 -15   23.00    7.90
 -11  -1  15  151.48   21.10
  11  -1 -15  121.69   13.60
  11  -1 -15  126.09   15.30
  11   1 -15  282.67  151.18
  11   1 -15  120.89   11.70
  11   1 -15  126.69   10.20
  11   1 -15  144.69   13.70
  11   1 -15  130.29   10.40
   9  -1 -15   11.90    2.80
   9  -1 -15    9.70    4.00
   9  -1 -15    7.40    5.60
   9  -1 -15   63.49  113.99
   9  -1 -15    9.50    3.40
   9   1 -15    9.30    3.60
   9   1 -15   10.10    3.10
   9   1 -15    7.40    3.90
   9   1 -15   14.40  116.29
   9   1 -15   11.60    3.20
   7  -1 -15    2.30    2.30
   7  -1 -15    2.50    3.10
   7  -1 -15    1.50    2.60
   7  -1 -15    7.50    4.80
   7  -1 -15   20.80  101.59
   7   1 -15    0.80    4.70
   7   1 -15    3.00    3.60
   7   1 -15    6.10    3.40
   7   1 -15    3.40    2.60
   7   1 -15   50.09  120.39
   7   1 -15    2.90    2.80
   5  -1 -15  191.58   22.40
   5  -1 -15  203.18   20.30
   5  -1 -15  203.88   18.10
   5  -1 -15  214.38   22.60
   5  -1 -15  481.55  181.58
   5  -1 -15  190.88   14.30
   5   1 -15  172.08   18.10
   5   1 -15  237.38   20.40
   5   1 -15  180.88   14.60
   5   1 -15  160.58  124.99
   5   1 -15  218.28   14.80
  -3  -1  15  105.49   11.00
   3  -1 -15   89.29   13.20
   3  -1 -15  104.89   11.60
   3  -1 -15   98.69   12.50
   3  -1 -15   96.09    8.50
   3  -1 -15   91.99   12.70
   3  -1 -15  193.38  149.79
   3   1 -15  102.79   13.70
   3   1 -15   85.99   12.50
   3   1 -15  113.39   11.80
   3   1 -15  103.39    8.70
   3   1 -15   -3.30  124.89
   3   1 -15   92.89    8.20
   1  -1 -15   92.69   12.80
   1  -1 -15   98.39   13.60
   1  -1 -15   87.69   11.10
   1  -1 -15   59.19  135.09
   1  -1 -15   82.89   11.70
  -1  -1  15  101.79   10.80
   1   1 -15   90.89    8.20
   1   1 -15   92.59   13.10
   1   1 -15  101.99   11.30
   1   1 -15   60.89  107.89
   1   1 -15   92.29   13.00
   1   1 -15   84.49    8.10
   1  -1  15  175.88   15.10
  -1  -1 -15  135.69   15.90
  -1  -1 -15  138.39   17.10
  -1  -1 -15  143.59   17.90
  -1  -1 -15   23.10  118.49
  -1   1 -15  153.58   17.80
  -1   1 -15  145.29   11.60
  -1   1 -15   70.19  140.29
   1   1  15  145.89   13.60
  -1   1 -15  154.48   19.00
  -1   1 -15  163.18   16.10
   3  -1  15  155.98   17.40
  -3  -1 -15  188.38   21.10
  -3  -1 -15   74.69  115.19
   3  -1  15  155.58   15.20
  -3  -1 -15  201.48   19.60
  -3  -1 -15  168.58   21.40
   3   1  15  193.18   16.20
  -3   1 -15  186.08   14.10
  -3   1 -15  181.68   22.90
  -3   1 -15   55.79  123.99
  -3   1 -15  214.98   19.40
  -3   1 -15  209.98   22.30
   5  -1  15  139.89   14.60
  -5  -1 -15  168.08   20.70
   5  -1  15  152.78   14.40
  -5  -1 -15   18.70  105.49
   5  -1  15  154.08   17.00
  -5  -1 -15  178.18   20.10
  -5   1 -15  219.68   20.40
  -5   1 -15  213.98   21.80
  -5   1 -15  172.98   22.40
   5   1  15  179.08   15.80
  -7  -1 -15   13.50    4.60
   7  -1  15   26.00    5.60
  -7  -1 -15   15.60    5.90
   7  -1  15   19.10    6.90
  -7   1 -15   15.10    7.70
   7   1  15   16.90    5.50
  -7   1 -15   28.00    7.00
   9  -1  15   81.09   10.70
   9  -1  15   87.69    8.90
  -9  -1 -15   86.89   11.80
  -9  -1 -15   83.79   13.10
  -9   1 -15  115.99   14.10
   9   1  15   86.09   10.10
 -11  -1 -15    5.40    4.40
  11  -1  15    5.40    3.90
 -11   1 -15    7.90    4.80
  26   2 -15   14.50    2.60
  24   2 -15    1.30    2.50
  22  -2 -15   39.40   17.30
 -22  -2  15   12.80    9.90
  22   2 -15   33.70    6.40
  22   2 -15   24.00    3.90
  20  -2 -15   64.69   18.90
  20   2 -15   82.69    8.10
  20   2 -15   85.99   10.20
  20   2 -15   80.09    7.80
  18  -2 -15   42.60   20.50
  18  -2 -15   50.19   15.50
  18   2 -15   83.39    7.50
  18   2 -15   82.29   10.10
  18   2 -15   83.79    8.30
  16  -2 -15  136.89   17.30
  16  -2 -15   94.19   17.50
  16   2 -15   91.49   11.00
  16   2 -15  112.59   10.00
  16   2 -15   93.69    9.10
  14  -2 -15    8.50   12.50
 -14  -2  15   17.20    8.10
  14  -2 -15   20.00    6.60
  14  -2 -15   24.90    6.40
  14   2 -15   39.30  147.89
  14   2 -15   26.50    4.40
  14   2 -15   25.70    6.10
  14   2 -15   28.30    5.20
  12  -2 -15   71.59   10.90
 -12  -2  15   71.49   11.60
  12  -2 -15   63.09   10.30
  12  -2 -15   39.10   12.80
  12  -2 -15   63.79   11.50
  12   2 -15   62.39    6.70
  12   2 -15   70.79    9.30
  12   2 -15   71.09    7.70
  12   2 -15  -85.99  135.19
  10  -2 -15  232.18   26.10
  10  -2 -15  216.08   28.80
  10  -2 -15  224.38   25.90
  10  -2 -15  231.78   23.30
  10   2 -15  238.58   17.20
  10   2 -15  283.07   24.00
  10   2 -15  226.28   17.00
  10   2 -15  130.89  147.59
  10   2 -15  229.48   18.70
   8  -2 -15    3.10    3.70
   8  -2 -15   45.70  101.89
   8  -2 -15    9.40    5.20
   8  -2 -15    2.50    3.20
   8  -2 -15    3.60    3.50
   8   2 -15    4.30    2.90
   8   2 -15   11.50    4.80
   8   2 -15  -14.20  127.89
   8   2 -15   11.50    5.70
   8   2 -15    2.50    3.10
  -6  -2  15  185.38   33.80
   6  -2 -15  168.58   19.70
   6  -2 -15  278.77  149.79
   6  -2 -15  168.98   20.00
   6  -2 -15  162.98   18.20
   6  -2 -15  178.48   20.70
   6   2 -15   43.60  132.09
   6   2 -15  166.98   14.60
   6   2 -15  216.08   19.70
   6   2 -15  153.58   12.80
   6   2 -15  167.98   13.10
   4  -2 -15  279.27   31.30
   4  -2 -15  292.07   31.20
   4  -2 -15  293.37   28.70
   4  -2 -15  338.57  174.38
  -4  -2  15  312.77   23.30
   4   2 -15  278.17   20.40
   4   2 -15  302.37   20.40
   4   2 -15  108.79  145.49
  -4   2  15  305.27   21.50
  -2  -2  15   46.80    7.80
   2  -2 -15   35.10    8.00
   2  -2 -15  -22.30   99.09
   2  -2 -15   38.10    8.00
   2  -2 -15   38.60    7.50
  -2   2  15   42.70    7.20
   2   2 -15   43.00    5.70
   2   2 -15  -36.40  128.29
   2   2 -15   42.30    5.70
   2   2 -15   62.69   10.50
   0  -2 -15   -1.20  112.29
   0  -2 -15  256.47   26.50
   0  -2 -15  234.68   26.40
   0  -2 -15  214.18   24.00
   0  -2  15  240.68   20.20
   0   2 -15  248.18   17.10
   0   2 -15  246.88   17.40
   0   2 -15   39.30  130.69
   0   2  15  248.68   18.90
   2  -2  15  398.46   30.70
  -2  -2 -15   22.00  126.39
  -2  -2 -15  391.56   41.30
  -2  -2 -15  424.46   42.30
  -2  -2 -15  404.66   38.30
   2   2  15  440.06   28.80
  -2   2 -15  394.76   26.70
  -2   2 -15  383.06   42.50
  -4  -2 -15    7.70  122.79
  -4  -2 -15  165.78   17.80
  -4  -2 -15  159.68   19.20
  -4  -2 -15  156.68   19.60
   4  -2  15  115.99   16.10
  -4   2 -15  177.18   20.80
   4   2  15  162.88   14.80
  -4   2 -15  194.48   17.90
  -6  -2 -15   27.00    6.80
  -6  -2 -15   25.40    5.70
   6  -2  15   14.10    7.10
  -6  -2 -15   47.90  121.99
   6  -2  15   25.30    5.70
  -6   2 -15    9.50    8.20
   6   2  15   21.00    6.10
  -6   2 -15   19.20    7.20
   8  -2  15    4.40    4.30
  -8  -2 -15   63.79  112.39
   8  -2  15    5.90    5.50
  -8  -2 -15    6.40    4.20
   8   2  15    2.60    4.10
  -8   2 -15    3.90    6.00
  -8   2 -15    3.60    6.20
 -10  -2 -15    6.40    4.40
  10  -2  15    2.10    3.50
 -10   2 -15    6.00    5.90
  12  -2  15    2.00    2.80
 -12   2 -15    7.20    4.20
  23   3 -15   19.50    3.40
  21   3 -15   87.59    7.90
 -17  -3  15   46.00   10.10
  17  -3 -15    3.30   16.70
  17  -3 -15   26.90   12.30
  17   3 -15   46.90  130.19
  17   3 -15   33.10    4.90
  17   3 -15   23.50    4.60
  17   3 -15   26.40    5.90
  15  -3 -15  592.34   64.29
 -15  -3  15  688.63   64.29
  15  -3 -15  630.84   67.49
  15   3 -15  663.43   44.70
  15   3 -15  596.94   41.90
  15   3 -15  658.43   42.70
  13  -3 -15  171.58   22.30
  13  -3 -15  160.08   22.90
 -13  -3  15  178.38   23.60
  13  -3 -15  149.88   30.00
  13   3 -15  184.88   14.40
  13   3 -15   26.20  159.78
  13   3 -15  204.28   14.20
  13   3 -15  208.18   16.40
  11  -3 -15  187.38   29.70
  11  -3 -15  210.58   25.00
  11  -3 -15  208.28   25.20
 -11  -3  15  214.48   25.70
  11   3 -15  216.58   16.30
  11   3 -15   67.79  175.68
  11   3 -15  218.28   16.00
  11   3 -15  235.18   22.90
  11   3 -15  218.88   18.00
   9  -3 -15   33.40    7.40
   9  -3 -15   35.70    9.80
   9  -3 -15   20.50    6.80
   9   3 -15   35.50    8.90
   9   3 -15   -5.60  148.39
   9   3 -15   31.70    4.90
   9   3 -15   42.60    7.40
   9   3 -15   30.40    5.00
   7  -3 -15  132.29   18.40
   7  -3 -15  132.59   18.80
   7  -3 -15  129.19  123.79
   7  -3 -15  174.08   21.70
   7  -3 -15  157.88   17.30
   7   3 -15   73.79  155.08
   7   3 -15  148.29   12.30
   7   3 -15  190.28   19.40
   7   3 -15  151.28   12.20
   5  -3 -15  155.88   19.30
   5  -3 -15  144.89   17.50
  -5  -3  15  131.89   14.40
   5  -3 -15  132.39   17.90
   5  -3 -15   64.19  123.69
   5  -3 -15  134.79   16.20
   5   3 -15    8.00  138.59
   5   3 -15  137.49   11.30
   5   3 -15  136.19   11.20
   3  -3 -15  114.19   16.40
   3  -3 -15  144.59   17.80
   3  -3 -15  120.59   15.80
  -3  -3  15  102.99   13.10
   3  -3 -15  113.39   14.80
   3  -3 -15    6.00  108.19
   3   3 -15  154.18   17.70
   3   3 -15  116.39   10.10
   3   3 -15  134.49   10.60
   3   3 -15   27.40  144.39
   1  -3 -15  225.48   26.50
   1  -3 -15  236.98   26.20
   1  -3 -15  194.98   23.70
   1  -3 -15  276.07   27.90
   1  -3 -15   20.50  132.39
   1   3 -15   36.00  123.29
   1   3 -15  229.78   17.20
   1   3 -15  262.17   25.20
  -1   3  15  224.18   18.20
  -1  -3 -15  -28.90  132.89
  -1  -3 -15   97.49   13.00
   1  -3  15   86.59   12.20
  -1  -3 -15  110.09   14.00
  -1  -3 -15  112.29   15.10
  -1   3 -15  129.19   15.00
   1   3  15   89.39   10.70
  -3  -3 -15   64.79   10.50
  -3  -3 -15   -5.90  123.69
  -3  -3 -15   70.39   11.50
   3   3  15   61.59    8.40
  -3   3 -15   63.19   10.70
  -5  -3 -15   13.90  121.39
   5  -3  15   24.50    7.60
  -5  -3 -15   55.09    8.60
   5   3  15   42.60    6.70
  -7  -3 -15  105.49   12.00
   7   3  15   33.00  111.09
  -7   3 -15   87.29   13.20
   9   3  15   33.10   80.79
  11  -3  15    2.70    2.30
  20   4 -15   82.99    7.70
  18  -4 -15   21.10   17.20
  18   4 -15  -31.80   87.39
  16  -4 -15   38.40   18.20
  16  -4 -15   68.09   17.80
  16   4 -15    2.60  110.59
  16   4 -15   59.39    6.10
  16   4 -15   54.09    6.80
 -14  -4  15   24.20    8.20
  14  -4 -15    1.70   12.90
  14  -4 -15   20.60   15.00
  14  -4 -15    2.00    9.90
  14   4 -15   19.80    5.50
  14   4 -15   34.70  145.19
  14   4 -15   23.50    4.20
  14   4 -15   21.50    4.20
  12  -4 -15    2.60    7.10
 -12  -4  15   16.40    7.40
  12  -4 -15   13.90   11.80
  12   4 -15    8.20    3.60
  12   4 -15  -19.10  144.79
  12   4 -15    7.40    3.40
  10  -4 -15   29.70   11.00
  10  -4 -15   -1.30    8.00
  10  -4 -15   18.20    7.20
 -10  -4  15   29.70    7.90
  10   4 -15   14.50    4.00
  10   4 -15   24.70    4.60
  10   4 -15    2.00    7.10
  10   4 -15   -5.80  136.09
   8  -4 -15  260.27   29.20
  -8  -4  15  175.18   18.10
   8  -4 -15  226.98   25.90
   8  -4 -15  213.88   25.70
   8   4 -15   24.40  137.59
  -8   4  15  175.38   24.70
   8   4 -15  248.58   16.60
   8   4 -15  236.28   16.30
   8   4 -15  217.38   23.90
   6  -4 -15   34.50    7.90
   6  -4 -15   26.90    7.10
  -6  -4  15   27.10    7.00
  -6   4  15   30.30    9.50
   6   4 -15   54.39    6.20
   6   4 -15  -14.70  137.59
   6   4 -15   38.40    9.90
   4  -4 -15   71.09   11.40
  -4  -4  15   46.10    8.40
   4  -4 -15   54.39    9.60
   4   4 -15   53.29    6.90
   4   4 -15   66.69   11.60
   4   4 -15  -50.69  124.49
   2  -4 -15    1.90    4.40
  -2  -4  15   -0.90    5.00
   2  -4 -15   12.10    4.90
  -2   4  15    8.00    6.60
   2   4 -15  -21.10  109.29
   2   4 -15   -0.20    7.30
   0  -4 -15   79.89   11.70
   0   4 -15   69.19   11.60
   0   4  15   82.19   12.90
   2   4  15  -47.00  107.99
   4  -4  15   11.20    4.00
   4   4  15    6.50  107.29
   6  -4  15    5.20    3.40
   6   4  15  -14.10   75.49
   8  -4  15   47.50    6.40
  15  -5 -15    5.50    9.10
  15   5 -15    0.10   79.29
  13  -5 -15    8.70   10.40
  13   5 -15  -12.00   84.99
  11   5 -15   21.50  110.19
   9  -5 -15    8.10    9.10
   9   5 -15  -13.40  106.29
   7   5 -15   -1.10  107.69
  -5  -5  15   -1.20    4.40
   5   5 -15  -17.40  103.29
  -3  -5  15    0.00    3.50
  -3   5  15   -3.10  121.19
  -1  -5  15   -1.60    3.10
  -1   5  15  -13.20  125.59
   1  -5  15    2.40    3.20
   1   5  15  -26.80   94.69
   3   5  15   28.50   75.49
  26   0 -16    3.50    2.10
  24   0 -16    8.50    2.90
  22   0 -16  310.17   21.90
  22   0 -16  359.96   41.10
  22   0 -16  303.57   23.60
  20   0 -16   22.30   14.50
  20   0 -16   18.00    3.80
  20   0 -16   31.40    6.10
  18   0 -16  227.08   35.70
  18   0 -16  282.07   19.40
  18   0 -16  295.77   21.40
  16   0 -16    1.00    2.70
  16   0 -16   11.10    8.90
  16   0 -16    0.20    3.50
  14   0 -16   18.30    3.40
  14   0 -16   20.60    5.00
  14   0 -16   19.00    3.90
  12   0 -16  189.18  125.29
  12   0 -16  112.09   10.70
  12   0 -16  111.79    9.10
 -12   0  16  141.89   19.50
  10   0 -16    2.30    2.30
  10   0 -16   14.70   88.99
  10   0 -16    1.50    2.50
  10   0 -16    2.10    3.30
   8   0 -16  229.68   20.90
   8   0 -16  265.47   21.20
   8   0 -16  247.28   17.40
   8   0 -16  253.37   24.10
   8   0 -16  623.64  185.38
   6   0 -16  514.05   32.00
   6   0 -16  475.25   48.20
   6   0 -16  593.64  197.38
   6   0 -16  446.96   34.50
   6   0 -16  493.65   44.60
   4   0 -16  744.03   67.49
   4   0 -16  415.36  180.98
   4   0 -16  602.74   45.00
   4   0 -16  617.14   64.79
   4   0 -16  676.53   60.19
   4   0 -16  670.43   43.00
   2   0 -16   49.20  108.69
   2   0 -16   54.29   10.80
   2   0 -16   71.39   10.60
  -2   0  16   26.20   29.00
   2   0 -16   82.19    7.50
   2   0 -16   80.09    9.30
   0   0 -16    1.60    3.20
   0   0 -16   -1.00    4.00
   0   0 -16   -3.40    2.90
   0   0 -16    1.60    3.60
   0   0 -16  -82.89   82.99
  -2   0 -16   46.30    8.10
  -2   0 -16   41.90    7.20
  -2   0 -16   31.40    7.80
  -2   0 -16   10.40  131.49
  -4   0 -16  -49.10  104.39
   4   0  16    4.10    5.20
  -4   0 -16   -0.40    3.10
  -4   0 -16    1.20    4.80
  -4   0 -16    1.90    3.80
  -6   0 -16   83.69   10.90
  -6   0 -16   64.29   12.50
   6   0  16   48.00    8.20
  -8   0 -16   29.50    7.40
  -8   0 -16   34.70    6.80
   8   0  16   21.90    5.70
 -10   0 -16    2.10    4.10
 -12   0 -16    7.00    4.00
  27   1 -16   16.40    2.50
  25   1 -16   11.80    2.90
  23  -1 -16   35.30   13.80
  23   1 -16   -1.80    3.80
  21  -1 -16    6.50   14.40
  21   1 -16    8.30    4.70
  19  -1 -16   45.20   15.20
  19  -1 -16    5.50   24.20
  19   1 -16   52.69    6.10
  19   1 -16   68.79   15.30
  19   1 -16   54.39    8.00
  17  -1 -16  185.88   35.50
  17   1 -16  210.98   30.00
  17   1 -16  236.08   16.40
  17   1 -16  220.58   16.30
  17   1 -16  238.48   18.30
  15   1 -16  142.69   13.00
  15   1 -16  149.88   21.00
  15   1 -16  133.99   11.30
  15   1 -16  143.89   11.20
  13   1 -16  160.58   14.10
  13   1 -16  162.68   12.60
  13   1 -16  164.68   12.40
  13   1 -16  208.18  149.59
  11  -1 -16  494.45   51.99
  11  -1 -16  524.95   48.20
  11   1 -16  569.04   48.10
  11   1 -16  580.44  184.48
  11   1 -16  515.95   35.20
  11   1 -16  521.75   34.60
  11   1 -16  535.65   36.90
   9  -1 -16   50.59    5.70
   9  -1 -16  112.49  113.49
   9  -1 -16   55.39    7.90
   9  -1 -16   59.59    9.50
   9   1 -16   47.90  113.99
   9   1 -16   58.49    7.80
   9   1 -16   61.79    6.50
   9   1 -16   69.89    8.30
   9   1 -16   52.49    6.10
   7  -1 -16   71.89  127.09
   7  -1 -16  105.49    8.70
   7  -1 -16  112.39   13.40
   7  -1 -16  102.49   13.80
   7  -1 -16  104.59   12.20
   7  -1 -16   76.99   11.60
   7   1 -16  111.39    9.20
   7   1 -16   94.99   13.40
   7   1 -16   98.29    8.80
   7   1 -16  115.79   12.40
   7   1 -16  110.09   10.70
   7   1 -16   97.59  127.79
   5  -1 -16   44.00  114.29
   5  -1 -16  109.09   14.00
   5  -1 -16   95.09   13.80
  -5  -1  16  113.09   11.50
   5  -1 -16  115.09   12.40
   5  -1 -16   93.89    8.70
   5  -1 -16  101.79   13.30
   5   1 -16  106.69    9.20
   5   1 -16  115.89   12.30
   5   1 -16   23.80  120.09
   5   1 -16  105.19   14.30
   5   1 -16   93.89    8.70
   3  -1 -16  -37.80  109.69
   3  -1 -16   31.00    7.30
   3  -1 -16   40.80    7.10
  -3  -1  16   38.40    7.40
   3  -1 -16   31.40    6.30
   3  -1 -16   36.20    5.00
   3   1 -16   41.30    5.10
   3   1 -16   20.90    6.10
   3   1 -16   45.30  120.79
   3   1 -16   41.50    7.10
   3   1 -16   37.90    5.20
   1  -1 -16    9.60    5.20
   1  -1 -16    7.50    4.10
   1  -1 -16    2.30  124.09
   1  -1 -16    9.00    4.10
  -1  -1  16   12.30    5.80
   1   1 -16   13.40    4.60
   1   1 -16   80.19  140.19
   1   1 -16    7.10    3.90
   1   1 -16   10.00    3.50
   1   1 -16    8.90    3.60
   1   1 -16    5.70    4.50
   1  -1  16  537.95   35.10
  -1  -1 -16  440.56   48.00
  -1  -1 -16  468.35   43.30
  -1  -1 -16  409.96   46.60
  -1  -1 -16   62.79  140.39
  -1   1 -16  465.95   30.90
  -1   1 -16  107.99  138.59
  -1   1 -16  493.25   43.00
  -1   1 -16  451.45   48.10
   1   1  16  502.55   32.90
  -3  -1 -16  188.38   18.80
   3  -1  16  158.78   17.30
   3  -1  16  132.49   14.60
  -3  -1 -16  177.68   21.00
  -3  -1 -16  194.58   20.40
  -3  -1 -16  -16.10  103.19
   3   1  16  180.58   15.80
  -3   1 -16   12.30  120.79
  -3   1 -16  156.98   21.60
  -3   1 -16  190.68   18.50
  -3   1 -16  192.28   21.10
  -5  -1 -16   45.20  118.39
  -5  -1 -16   84.19   10.60
   5  -1  16   63.79    8.80
   5  -1  16   54.69    8.20
  -5  -1 -16   74.49   11.80
   5  -1  16   69.59   10.60
   5   1  16   54.89    8.70
  -5   1 -16   78.89   13.70
  -5   1 -16   82.59   12.20
   7  -1  16   56.19    7.00
  -7  -1 -16   53.19    8.60
   7  -1  16   41.70    8.10
  -7  -1 -16   46.70    8.90
  -7   1 -16   38.70    9.60
  -7   1 -16   63.39   10.60
   7   1  16   35.70    7.20
  -9  -1 -16   45.90    8.30
   9  -1  16   35.70    5.40
  -9   1 -16   49.50    9.10
  11  -1  16    1.90    3.80
 -11  -1 -16    2.40    4.60
 -11   1 -16   -1.70    3.60
  26   2 -16   12.70    2.50
  24   2 -16   12.30    2.90
 -22  -2  16   50.59   17.10
  22   2 -16   56.19    5.90
  22   2 -16   51.39    7.70
 -20  -2  16   78.09   14.70
  20  -2 -16   84.69   19.70
  20   2 -16   80.29    7.80
  20   2 -16   76.19    7.80
  20   2 -16   75.99    9.50
 -18  -2  16   61.49   12.70
  18   2 -16   50.49    6.70
  18   2 -16   58.79    8.60
  18   2 -16   62.09    7.20
  16  -2 -16  184.78   24.00
  16  -2 -16  192.08   23.70
 -16  -2  16  191.68   25.00
  16   2 -16  199.58   15.10
  16   2 -16  193.68   14.50
  16   2 -16  194.88   16.50
  16   2 -16   72.59  137.39
  14  -2 -16  123.19   15.00
 -14  -2  16   97.19   17.30
  14  -2 -16  104.79   14.90
  14  -2 -16   81.49   18.60
  14   2 -16   98.79  150.28
  14   2 -16   97.59    9.00
  14   2 -16  105.19    9.80
  14   2 -16   97.49   11.00
  12  -2 -16   85.49   13.20
  12  -2 -16   67.09   15.10
  12  -2 -16   81.09   10.70
  12  -2 -16   97.39   12.70
  12   2 -16   86.09   10.40
  12   2 -16   96.39    8.80
  12   2 -16   40.40  146.59
  12   2 -16   86.29    8.20
  10  -2 -16  773.82   72.29
  10  -2 -16  661.53   63.89
  10  -2 -16  653.33   74.89
  10  -2 -16  666.13   69.09
  10   2 -16  307.37  196.68
  10   2 -16  750.22   48.80
  10   2 -16  695.63   46.70
  10   2 -16  749.42   46.00
   8  -2 -16  350.16   37.40
   8  -2 -16  366.46   34.40
   8  -2 -16  365.46   38.10
   8  -2 -16  527.05  183.58
   8   2 -16  359.36   26.50
   8   2 -16  147.89  161.78
   8   2 -16  340.37   24.70
   8   2 -16  372.06   24.70
   6  -2 -16  192.48  142.69
   6  -2 -16  222.38   24.40
   6  -2 -16  219.48   22.30
   6  -2 -16  209.18   24.50
   6   2 -16  213.28   16.00
   6   2 -16    1.60  120.59
   6   2 -16  222.88   16.10
   4  -2 -16   83.39  132.39
   4  -2 -16  215.08   25.40
   4  -2 -16  216.58   25.60
   4  -2 -16  227.28   23.40
  -4  -2  16  268.77   20.10
   4   2 -16   -2.50  142.69
  -4   2  16  238.58   18.00
   4   2 -16  235.78   16.70
   4   2 -16  227.78   16.70
   2  -2 -16   22.30    5.60
   2  -2 -16   32.30    6.60
   2  -2 -16   21.80    6.30
  -2  -2  16   33.00    7.50
   2  -2 -16   55.29  116.99
   2   2 -16   43.40    7.80
   2   2 -16   34.40    5.00
  -2   2  16   32.30    6.50
   2   2 -16   47.30  141.79
   2   2 -16   34.20    5.20
   0  -2 -16  459.25   46.90
   0  -2 -16   89.49  146.99
   0  -2  16  413.86   33.30
   0  -2 -16  436.96   45.90
   0  -2 -16  424.86   42.30
   0   2 -16   95.69  139.89
   0   2 -16  531.75   42.60
   0   2  16  472.95   31.70
   0   2 -16  430.26   29.70
  -2  -2 -16   55.89   10.60
  -2  -2 -16   60.59    9.30
  -2  -2 -16  -12.20  113.19
   2  -2  16   35.80    7.50
  -2  -2 -16   61.29    9.60
  -2   2 -16   73.39   10.00
  -2   2 -16   67.79   11.10
  -2   2 -16   71.19   12.80
   2   2  16   55.39    8.50
  -2   2 -16   54.89    6.40
  -4  -2 -16  -42.80  109.89
  -4  -2 -16   41.10    8.30
  -4  -2 -16   40.20    7.20
   4  -2  16   37.00    6.90
  -4  -2 -16   32.20    6.50
   4  -2  16   24.80    8.00
  -4   2 -16   31.80    9.00
   4   2  16   39.60    7.50
  -4   2 -16   35.40    7.70
  -4   2 -16   36.90    6.80
  -6  -2 -16   32.30  112.49
  -6  -2 -16    5.40    4.30
   6  -2  16   12.10    4.90
   6  -2  16   -1.70    6.00
  -6  -2 -16    9.00    4.40
   6   2  16    5.60    4.50
  -6   2 -16   12.30    6.10
  -8  -2 -16   -0.70    3.90
   8  -2  16    0.90    4.00
  -8   2 -16   -0.20    5.30
  10  -2  16    4.90    3.70
 -10   2 -16    7.70    4.70
  23   3 -16   34.70    4.30
  21   3 -16   12.60    3.20
  19  -3 -16   13.60   16.10
  19  -3 -16  -10.00   15.00
 -19  -3  16   28.30    9.30
  19   3 -16   23.80    4.60
  19   3 -16   27.00    4.20
  19   3 -16   23.90    5.40
  17  -3 -16  155.58   25.90
  17  -3 -16  111.89   26.20
 -17  -3  16  166.18   23.10
  17   3 -16   30.10  124.19
  17   3 -16  171.18   14.50
  17   3 -16  176.78   12.70
  17   3 -16  161.58   13.00
 -15  -3  16  235.08   27.10
  15  -3 -16  188.68   26.20
  15  -3 -16  204.08   27.80
  15  -3 -16  158.08   34.10
  15   3 -16  216.78   16.50
  15   3 -16  224.28   16.10
  15   3 -16  270.87   18.60
  15   3 -16   34.10  137.09
 -13  -3  16   15.20    7.50
  13  -3 -16    4.80   11.80
  13  -3 -16   -9.90    6.50
  13  -3 -16    7.40    5.70
  13   3 -16    5.00    3.50
  13   3 -16  -18.20  153.58
  13   3 -16   13.20    4.00
  13   3 -16    6.70    5.10
  11  -3 -16  144.19   19.90
  11  -3 -16  150.28   24.60
  11  -3 -16  137.69   19.70
  11   3 -16   21.80  146.79
  11   3 -16  169.18   12.90
  11   3 -16  154.98   14.70
  11   3 -16  178.28   17.90
  11   3 -16  158.88   12.50
   9  -3 -16  184.18   23.80
   9  -3 -16  195.28   27.00
   9  -3 -16  190.78   23.90
   9  -3 -16  177.68   21.20
   9   3 -16    0.50  147.29
   9   3 -16  255.87   22.80
   9   3 -16  209.18   15.60
   9   3 -16  228.28   17.90
   9   3 -16  217.98   15.50
   7  -3 -16  201.58   24.80
   7  -3 -16  214.68   22.50
   7  -3 -16  198.18   24.50
   7  -3 -16  227.18   27.30
  -7  -3  16  215.78   19.10
   7  -3 -16   29.20  112.49
   7   3 -16  215.68   16.10
   7   3 -16  212.28   16.00
   7   3 -16  253.07   23.90
   7   3 -16  -10.30  137.09
   5  -3 -16  282.87   30.00
   5  -3 -16  358.86   35.30
  -5  -3  16  264.87   24.10
   5  -3 -16  293.37   32.70
   5  -3 -16  293.27   32.90
   5  -3 -16   42.00  130.79
   5   3 -16  318.07   21.60
   5   3 -16  314.87   21.20
   5   3 -16   12.50  139.99
   3  -3 -16   32.90  113.19
   3  -3 -16   97.49   12.70
  -3  -3  16   78.89   11.30
   3  -3 -16   92.39   13.30
   3  -3 -16   90.89   14.30
   3   3 -16  127.49   15.00
   3   3 -16   95.99    8.60
   3   3 -16   19.30  140.19
   3   3 -16   95.19    8.90
  -1  -3  16   35.20    8.20
   1  -3 -16   38.10    8.60
   1  -3 -16   60.69    9.90
   1  -3 -16   49.40    9.00
   1  -3 -16   -0.20  128.19
   1   3 -16   12.40  125.09
   1   3 -16   50.39    6.40
   1   3 -16   51.89    9.40
  -1   3  16   40.90    7.00
  -1  -3 -16    1.30    3.70
   1  -3  16    2.20    4.40
  -1  -3 -16   42.70  126.59
   1  -3  16    0.40    5.90
  -1  -3 -16    6.00    4.90
  -1  -3 -16    3.50    3.90
  -1   3 -16    2.00    5.50
   1   3  16    3.60    4.40
  -3  -3 -16  -48.70  102.89
   3  -3  16    6.70    4.50
   3  -3  16   14.20    6.80
   5  -3  16   41.00    8.60
   5  -3  16   58.79    7.70
   5   3  16   99.89   11.90
   7   3  16  -19.70   90.29
   9  -3  16   41.20    4.80
  20   4 -16   69.19    6.10
  18  -4 -16   21.00   16.80
  18   4 -16    0.90   83.79
  16  -4 -16   28.80   15.60
  16   4 -16  -45.70  109.19
  14  -4 -16   33.90   14.70
  14  -4 -16   60.69   16.70
  14   4 -16  -29.60  118.79
  14   4 -16   68.59    6.60
  14   4 -16   58.59    6.50
  12  -4 -16   54.09   14.50
  12  -4 -16   61.69   12.20
  12  -4 -16   54.99   13.00
  12   4 -16   79.89    7.30
  12   4 -16   71.49    7.10
  12   4 -16  -14.70  124.89
 -10  -4  16   31.40    6.70
  10  -4 -16   25.50    7.40
  10  -4 -16   30.50   10.10
  10   4 -16   38.00  147.19
  10   4 -16   29.00    4.60
  10   4 -16   38.40    5.20
  10   4 -16   14.20    6.90
  -8  -4  16   -0.20    4.70
   8  -4 -16    9.50    5.40
   8  -4 -16   -3.70    5.10
   8   4 -16    7.50    3.80
   8   4 -16    0.00    6.50
  -8   4  16   17.30    7.80
   8   4 -16    2.90    2.90
   8   4 -16    3.90  136.59
  -6  -4  16   13.50    5.60
   6  -4 -16    6.70    5.30
   6  -4 -16   19.10    5.80
  -6   4  16   24.80    8.50
   6   4 -16   22.30    4.60
   6   4 -16   10.90  125.79
   6   4 -16    8.90    7.20
  -4  -4  16   40.60    7.60
   4  -4 -16   29.30    7.30
  -4   4  16   25.60    8.50
   4   4 -16    0.90  118.59
   4   4 -16   47.10    9.20
   4   4 -16   49.10    5.90
  -2  -4  16  115.69   13.50
   2  -4 -16  139.19   17.10
   2   4 -16  -13.60  104.99
  -2   4  16  122.59   17.10
   2   4 -16  158.38   16.70
   0  -4  16    0.30    4.30
   0  -4  16   -0.30    6.20
   0   4  16   37.60    8.80
   0   4 -16   13.40    6.30
   2  -4  16    4.40    4.20
   2   4  16  -16.90  104.29
   4  -4  16   21.60    4.20
   4   4  16   17.90   95.19
   6  -4  16   16.10    3.20
   6   4  16    5.90   64.79
  15  -5 -16   -1.10    7.40
  15   5 -16  -10.80   69.29
  13  -5 -16    5.80    8.50
  13   5 -16  -32.30   78.89
  11   5 -16  -18.60   84.79
   9   5 -16  -28.50  110.39
   7   5 -16  -36.00  104.09
  -5  -5  16   -3.90    3.30
   5   5 -16  -71.69  101.59
  -3  -5  16    5.60    3.30
  -3   5  16  -13.90  162.48
  -1  -5  16    1.80    3.40
  -1   5  16  -27.90   87.89
   1   5  16  -20.00   85.99
  26   0 -17   44.10    4.30
  24   0 -17    1.90    2.40
  20   0 -17  188.08   15.50
  20   0 -17  179.28   13.60
  18   0 -17  106.89    9.30
  18   0 -17  110.39   11.20
  18   0 -17  129.49   24.40
  16   0 -17  422.26   31.70
  16   0 -17  468.45   30.60
  14   0 -17  159.68   12.10
  14   0 -17  169.28   14.10
  12   0 -17   47.00  115.59
  12   0 -17   24.10    4.80
  12   0 -17   28.00    4.20
  10   0 -17  246.98   23.70
  10   0 -17  241.28   17.10
  10   0 -17  251.67  138.29
   8   0 -17    4.20    2.80
   8   0 -17  -38.40   85.99
   8   0 -17    6.40    3.30
   6   0 -17   10.00    4.40
   6   0 -17   18.20    4.60
   6   0 -17   -6.10  120.89
   6   0 -17   16.40    3.70
   4   0 -17    6.40    3.80
   4   0 -17  -18.40  119.99
   4   0 -17   10.50    4.70
   4   0 -17   10.40    3.90
   2   0 -17  -32.80  112.19
   2   0 -17    4.50    3.40
   2   0 -17    3.00    3.90
   2   0 -17    4.60    3.50
   2   0 -17    0.60    4.00
   0   0 -17  109.79   14.00
   0   0 -17  113.39   15.20
   0   0 -17  -49.40  124.19
   0   0 -17  107.29   12.60
   0   0 -17  102.39    9.80
  -2   0 -17    9.70  128.29
  -2   0 -17  197.88   20.00
  -2   0 -17  208.08   22.30
   2   0  17  204.98   17.20
  -2   0 -17  164.98   22.40
  -4   0 -17   12.90    4.70
  -4   0 -17   17.20    4.80
  -4   0 -17   42.20  108.79
  -4   0 -17   11.30    5.80
   4   0  17   13.60    5.80
  -6   0 -17    1.50    4.70
  -6   0 -17    2.20    3.90
   6   0  17    3.10    4.90
  -8   0 -17    9.80    4.40
 -10   0 -17    0.30    3.60
  25   1 -17    6.10    2.50
  23   1 -17  101.39    8.50
  21   1 -17  129.39   10.40
  21   1 -17  124.69   12.30
  19   1 -17   99.79   10.90
  19   1 -17   96.99    8.80
  17   1 -17   15.40    3.80
  17   1 -17   14.80    3.70
  17   1 -17   14.60    5.20
  15   1 -17   60.49    6.80
  15   1 -17   61.09    8.10
  15   1 -17   60.29    6.80
  13   1 -17  159.08  132.59
  13   1 -17  163.08   12.70
  13   1 -17  171.08   13.00
  13   1 -17  168.98   14.50
  11  -1 -17  184.58   22.00
  11  -1 -17  248.98  142.29
  11  -1 -17  192.08   20.10
  11   1 -17  367.66  175.38
  11   1 -17  194.58   14.60
  11   1 -17  206.68   16.60
  11   1 -17  208.98   19.90
  11   1 -17  208.88   14.90
   9  -1 -17  329.37   34.80
   9  -1 -17  312.77   21.90
   9  -1 -17  313.97   31.20
   9  -1 -17  423.86  167.78
   9  -1 -17  305.17   34.00
   9   1 -17  328.07   24.40
   9   1 -17  343.87   22.80
   9   1 -17  289.67  159.68
   9   1 -17  331.77   22.70
   9   1 -17  359.56   31.20
   7  -1 -17  143.99   17.00
   7  -1 -17  136.79   10.90
   7  -1 -17   11.00  117.39
   7  -1 -17  153.38   17.70
   7  -1 -17  138.39   15.40
   7   1 -17  157.48   11.70
   7   1 -17  125.49   11.00
   7   1 -17  153.18   15.60
   7   1 -17   35.40  115.59
   5  -1 -17   52.59    9.70
   5  -1 -17   47.30    8.80
  -5  -1  17   52.49    8.30
   5  -1 -17   11.70  121.49
   5  -1 -17   48.10    5.90
   5  -1 -17   55.19    8.30
   5   1 -17   57.29  122.59
   5   1 -17   52.89    6.40
   5   1 -17   63.49    8.70
   5   1 -17   46.10    5.90
   3  -1 -17   35.00    7.00
  -3  -1  17   38.40    7.70
   3  -1 -17   32.60    6.80
   3  -1 -17   31.70    7.80
   3  -1 -17   23.70  119.79
   3   1 -17   41.80    5.20
   3   1 -17   36.80    6.70
   3   1 -17   43.10  133.29
   3   1 -17   45.30    6.00
   1  -1 -17  462.35   49.50
   1  -1 -17  450.95   44.40
   1  -1 -17   38.80  137.59
   1  -1 -17  421.56   48.10
  -1  -1  17  555.04   35.90
   1   1 -17   72.09  142.29
   1   1 -17  474.45   48.10
   1   1 -17  489.15   49.40
  -1   1  17  502.65   33.60
   1   1 -17  500.15   44.30
   1   1 -17  502.25   31.90
  -1  -1 -17   60.99    8.70
   1  -1  17   46.30    9.40
  -1  -1 -17  -47.90   95.99
  -1  -1 -17   46.20    9.40
   1  -1  17   42.50    7.50
  -1  -1 -17   48.70    8.90
  -1   1 -17  -33.70  101.89
  -1   1 -17   45.60    9.60
   1   1  17   64.29    9.10
  -1   1 -17   63.99    8.70
  -1   1 -17   51.89    9.40
  -1   1 -17   59.09    6.90
  -3  -1 -17   18.40    5.10
   3  -1  17   14.90    6.00
   3  -1  17   20.40    7.60
  -3  -1 -17  -30.50  110.29
  -3  -1 -17   17.30    6.20
  -3  -1 -17   17.80    5.20
   3  -1  17   13.70    5.60
  -3   1 -17   22.30    5.80
  -3   1 -17   16.50    7.40
  -3   1 -17   19.00    5.00
   3   1  17   24.80    6.90
   5  -1  17   50.59    8.10
  -5  -1 -17   73.19    9.90
   5  -1  17   66.39    8.30
  -5  -1 -17   61.39   11.10
  -5  -1 -17    6.40   96.49
   5  -1  17   60.69    9.60
  -5   1 -17   51.29   11.00
  -5   1 -17   76.19   11.30
   5   1  17   61.19    9.00
   7  -1  17   15.10    4.40
  -7  -1 -17   16.10    4.70
  -7  -1 -17   12.00    4.80
  -7   1 -17   23.60    6.00
  -7   1 -17   17.70    6.00
   7   1  17   16.60    5.50
  -9  -1 -17   12.10    4.50
   9  -1  17   10.30    3.90
  -9   1 -17   11.20    4.80
 -11  -1 -17   12.20    3.90
 -11   1 -17    4.90    3.30
  24   2 -17   24.70    3.70
  22   2 -17    8.50    3.00
 -20  -2  17   -9.50    6.50
  20   2 -17   -3.30    2.60
  20   2 -17   -2.00    4.10
  20   2 -17    0.40    2.50
  18  -2 -17  -14.70   15.50
 -18  -2  17   11.90    8.00
  18   2 -17   12.40    3.60
  18   2 -17   15.60    3.60
  18   2 -17   21.50    5.90
 -16  -2  17   28.00    8.80
  16  -2 -17   -1.20   14.80
  16   2 -17   25.90    4.30
  16   2 -17   -7.60  114.99
  16   2 -17   31.40    6.60
  16   2 -17   23.20    4.60
  14  -2 -17  226.38   26.00
  14  -2 -17  241.58   26.80
  14   2 -17  250.57   17.40
  14   2 -17  225.78   18.90
  14   2 -17   88.09  147.69
  14   2 -17  215.48   16.80
  12  -2 -17    9.90    5.10
  12  -2 -17   18.40    5.20
  12  -2 -17   12.40    5.20
  12   2 -17   13.00    4.10
  12   2 -17  -25.60  141.49
  12   2 -17   13.50    5.30
  12   2 -17   17.50    4.10
  10  -2 -17   38.30    7.70
  10  -2 -17   32.10    7.90
  10   2 -17   18.30  148.09
  10   2 -17   51.19    7.80
  10   2 -17   49.50    6.30
  10   2 -17   42.90    5.50
  10   2 -17   42.90    7.70
   8  -2 -17  169.88   20.90
   8  -2 -17   81.39  116.99
   8  -2 -17  179.18   21.40
   8  -2 -17  174.68   19.00
   8   2 -17  182.28   15.80
   8   2 -17  167.08  165.58
   8   2 -17  207.68   19.60
   8   2 -17  169.48   13.70
   8   2 -17  177.38   14.00
  -6  -2  17   27.60    7.40
   6  -2 -17   53.69  127.89
   6  -2 -17   19.10    5.50
   6  -2 -17   45.90    8.00
   6  -2 -17   24.80    6.80
   6   2 -17   31.90    5.10
   6   2 -17   32.30    5.00
   6   2 -17   98.39  149.29
   4  -2 -17  182.48   20.70
   4  -2 -17   50.79  112.89
   4  -2 -17  192.98   22.50
  -4  -2  17  221.28   18.30
   4  -2 -17  177.38   22.80
   4   2 -17  203.88   15.00
   4   2 -17  192.68   15.00
   4   2 -17  230.48   21.40
   4   2 -17  -26.10  142.19
  -4   2  17  209.08   16.30
   2  -2 -17   20.70  116.99
   2  -2 -17  210.38   25.30
  -2  -2  17  219.98   19.80
   2  -2 -17  211.28   23.10
   2  -2 -17  224.18   25.20
   2   2 -17  220.08   16.60
   2   2 -17  239.78   16.60
  -2   2  17  242.38   18.30
   2   2 -17  248.68   23.40
   2   2 -17   -1.60  127.49
   0  -2 -17  201.78   24.50
   0  -2 -17  191.78   22.00
   0  -2 -17   13.50  125.09
   0  -2 -17  216.38   24.20
   0  -2  17  263.37   20.50
   0   2 -17  240.68   22.50
   0   2 -17   91.09  136.89
   0   2 -17  215.08   15.70
   0   2  17  210.98   17.70
   2  -2  17   22.50    6.50
   2  -2  17   20.90    7.50
  -2  -2 -17   36.00    7.80
  -2  -2 -17   10.50  109.29
  -2  -2 -17   28.80    6.30
  -2  -2 -17   40.10    7.70
   2   2  17   19.50    6.00
  -2   2 -17   34.60    6.80
  -4  -2 -17  182.28   20.90
  -4  -2 -17  -17.00  113.69
   4  -2  17  137.99   14.90
  -4  -2 -17  182.98   21.30
  -4   2 -17  229.38   20.80
   4   2  17  164.58   15.40
  -4   2 -17  205.98   21.50
  -6  -2 -17   38.60  107.59
   6  -2  17    5.10    4.50
  -6  -2 -17    9.70    4.40
   6   2  17    7.50    4.80
  -6   2 -17   14.50    5.70
   8  -2  17   16.00    4.20
  -8  -2 -17   20.10    5.30
  -8   2 -17   20.70    6.00
  10  -2  17   26.30    4.30
 -10   2 -17   42.20    6.40
  23   3 -17    7.90    2.50
  21   3 -17    8.80    2.90
  19   3 -17   11.10    3.30
  17  -3 -17   -9.20    9.70
 -17  -3  17   33.60    8.60
  17  -3 -17   14.30   10.70
  17  -3 -17    3.10   15.40
  17   3 -17   25.40    4.60
  17   3 -17  -27.10  113.79
  15  -3 -17   28.00   10.00
 -15  -3  17   61.09   12.30
  15  -3 -17   28.50    8.90
  15  -3 -17   44.20   15.60
  15   3 -17   38.40    5.50
  15   3 -17   51.39    6.20
  15   3 -17  118.59  156.48
  15   3 -17   48.30    7.20
  13  -3 -17  115.79   16.60
  13  -3 -17   87.49   17.70
  13  -3 -17  119.89   24.60
  13   3 -17  130.89   10.40
  13   3 -17  132.19   10.70
  13   3 -17    7.70  140.69
  13   3 -17  128.59   12.50
  11  -3 -17   38.20    8.40
  11  -3 -17   52.29   11.40
  11  -3 -17   27.10    7.80
  11   3 -17   10.40  140.19
  11   3 -17   34.80    5.10
  11   3 -17   34.90    5.30
  11   3 -17   50.09    8.00
  11   3 -17   35.90    7.50
   9  -3 -17  103.79   13.50
   9  -3 -17  102.89   15.90
   9  -3 -17  101.49   15.30
   9   3 -17  110.59    9.90
   9   3 -17   85.39  176.48
   9   3 -17  123.89   14.80
   9   3 -17  125.29   10.20
   7  -3 -17    5.70    5.10
   7  -3 -17    8.10    4.60
   7  -3 -17    1.60    4.50
  -7  -3  17   -2.30    5.80
   7  -3 -17   20.10  101.49
   7   3 -17    9.90    3.90
   7   3 -17  -23.80  139.09
   7   3 -17    9.30    6.80
   7   3 -17    6.80    3.30
   5  -3 -17  137.29   17.70
   5  -3 -17  123.49   15.40
  -5  -3  17  114.19   14.00
   5  -3 -17  112.19   16.20
   5  -3 -17   41.30  117.69
   5   3 -17  137.89   11.20
   5   3 -17   40.40  141.29
   5   3 -17  129.49   10.80
   5   3 -17  162.58   16.90
   3  -3 -17  200.38   23.60
  -3  -3  17  179.98   18.40
   3  -3 -17  206.58   24.30
   3  -3 -17   36.10  128.19
   3  -3 -17  204.48   21.90
   3   3 -17   -7.80  124.59
   3   3 -17  214.98   15.30
   3   3 -17  245.28   22.70
   3   3 -17  206.78   15.60
   1  -3 -17  -31.80  109.59
  -1  -3  17  147.59   16.70
   1  -3 -17  189.58   20.70
   1  -3 -17  165.28   19.00
   1  -3 -17  202.78   21.70
   1   3 -17  204.98   19.80
  -1   3  17  148.59   15.10
   1   3 -17   23.50  119.39
  -1  -3 -17    7.00    4.30
  -1  -3 -17   10.80    4.90
   1  -3  17    4.10    4.60
  -1  -3 -17  -29.10  115.89
   1  -3  17    1.80    5.90
  -1  -3 -17   16.70    5.60
   1   3  17   10.80    4.80
  -1   3 -17    6.70    5.10
  -3  -3 -17   68.19   10.10
  -3  -3 -17    3.90  108.79
   3   3  17   51.59    9.30
   5  -3  17   33.50    5.40
   7   3  17   17.70   74.89
  18  -4 -17    0.10   15.00
  18   4 -17  -28.40   75.09
  16  -4 -17    8.50   13.60
  16   4 -17   -9.60   90.29
  16   4 -17    5.90    3.00
  14  -4 -17   71.09   15.70
  14   4 -17   79.49  127.79
  14   4 -17   75.69    7.20
  12  -4 -17   17.90   10.70
  12  -4 -17   33.80    9.20
  12  -4 -17   36.80   12.40
  12   4 -17   45.70    5.50
  12   4 -17   53.59    5.80
  12   4 -17   -9.30  120.09
  10  -4 -17   75.19   14.10
  10  -4 -17  103.09   14.80
 -10  -4  17   81.49   10.80
  10   4 -17   31.70  121.29
  10   4 -17   97.89   12.60
  10   4 -17  108.09    8.70
  10   4 -17  113.39    9.00
   8  -4 -17   34.90    7.60
   8  -4 -17   21.30    7.20
  -8  -4  17   24.80    6.60
   8   4 -17   34.10    4.80
   8   4 -17   89.19  132.49
   8   4 -17   29.00    7.70
   8   4 -17   26.10    4.70
  -8   4  17   32.90    8.90
   6  -4 -17  182.68   22.90
   6  -4 -17  204.38   22.70
  -6  -4  17  143.29   16.50
   6   4 -17  211.88   14.90
   6   4 -17  236.38   21.40
   6   4 -17   -2.20  122.19
  -4  -4  17    5.70    5.30
   4  -4 -17   18.70    4.80
  -4   4  17    8.80    6.30
   4   4 -17   34.60  111.79
  -2  -4  17   10.00    4.60
   2   4 -17  -17.80  112.89
   0  -4  17    8.90    4.40
   0   4  17  -24.30  125.69
   2   4  17   22.60   91.09
   4  -4  17    3.90    3.00
   4   4  17  -16.30   71.89
  13  -5 -17    5.30    6.90
  13   5 -17    2.70   78.59
  11  -5 -17    1.90    6.60
  11   5 -17  -26.30   79.19
   9  -5 -17   23.00    8.10
   9   5 -17   43.80   90.59
   7  -5 -17   16.00    6.70
  -7  -5  17    2.10    3.10
   7   5 -17    0.20   86.39
  -5  -5  17    3.40    3.20
   5   5 -17  -19.70  127.19
  24   0 -18    5.30    2.50
  20   0 -18   23.70    4.00
  18   0 -18    0.70    3.80
  14   0 -18   -0.10    2.30
  12   0 -18    1.40   98.19
  12   0 -18    8.30    3.30
  12   0 -18    4.30    2.70
  10   0 -18  -11.90   98.89
  10   0 -18    1.50    2.50
  10   0 -18    0.50    2.60
   8   0 -18   77.39    7.20
   8   0 -18   68.59    9.20
   8   0 -18   71.99  115.29
   6   0 -18   33.00    7.00
   6   0 -18   39.10    6.80
   6   0 -18  -18.40  103.79
   6   0 -18   38.50    5.20
   4   0 -18  -45.70  118.29
   4   0 -18    5.90    3.50
   4   0 -18    7.30    4.60
   4   0 -18    5.00    4.00
   4   0 -18    6.40    3.70
   2   0 -18  -32.80  109.39
   2   0 -18   81.09   11.70
   2   0 -18   92.39    8.50
   2   0 -18   67.99   12.00
   2   0 -18   80.19   10.30
   0   0 -18   12.40    6.10
   0   0 -18  -30.60  112.59
   0   0 -18    8.90    3.90
   0   0 -18    7.80    4.60
  -2   0 -18   18.60    6.80
  -2   0 -18   26.20    5.90
  -2   0 -18   -4.30  109.69
   2   0  18   17.50    6.50
  -2   0 -18   26.00    5.60
  -4   0 -18    3.00    4.00
   4   0  18    4.50    5.20
  -4   0 -18    5.60  101.09
  -4   0 -18    8.30    5.60
   6   0  18    9.60    4.90
  -6   0 -18    1.70    4.00
  -6   0 -18    1.90    3.80
  -8   0 -18   -0.50    3.60
 -10   0 -18    0.20    2.90
  25   1 -18   11.60    2.70
  23   1 -18  110.99    9.00
  21   1 -18    3.40    2.80
  21   1 -18   -0.20    3.90
  19   1 -18   23.00    5.70
  19   1 -18   18.40    3.90
  17   1 -18   16.40    5.30
  17   1 -18   15.50    3.70
  17   1 -18    8.90    3.20
  15   1 -18  131.49   12.40
  15   1 -18  122.79   10.30
  15   1 -18  123.29   10.40
  15   1 -18   41.90  114.69
  13   1 -18  235.88   18.50
  13   1 -18  221.38   16.60
  13   1 -18  230.98   16.60
  13   1 -18  197.98  154.58
  11  -1 -18  -16.60   92.59
  11  -1 -18    7.90    4.00
  11  -1 -18    1.90    2.90
  11   1 -18    1.10    2.80
  11   1 -18    3.10    3.10
  11   1 -18    1.20  136.09
  11   1 -18    4.00    3.30
  11   1 -18    6.00    4.30
   9  -1 -18   51.89    8.40
   9  -1 -18   48.70  111.59
   9  -1 -18   48.20    7.80
   9  -1 -18   45.40    5.60
   9  -1 -18   48.80    9.40
   9   1 -18   54.79    6.60
   9   1 -18   41.30    6.80
   9   1 -18  100.19  142.29
   9   1 -18   51.39    6.20
   9   1 -18   51.49    7.90
   7  -1 -18  101.89   14.40
   7  -1 -18  100.19   12.40
   7  -1 -18  107.69   13.70
   7  -1 -18   24.30  110.29
  -7  -1  18  101.29   11.80
   7  -1 -18   89.59    8.70
   7   1 -18  115.09    9.70
   7   1 -18  101.69    9.10
   7   1 -18   62.39  125.19
   7   1 -18  113.89   12.50
  -5  -1  18  324.67   23.60
   5  -1 -18  245.08   30.60
   5  -1 -18  291.17   31.20
   5  -1 -18  286.37   19.90
   5  -1 -18  281.47   28.00
   5  -1 -18    7.00  109.09
   5   1 -18  117.59  130.99
   5   1 -18  306.77   20.50
   5   1 -18  313.37   28.00
   5   1 -18  271.47   20.10
   3  -1 -18  216.48   24.20
   3  -1 -18  182.68   20.90
  -3  -1  18  235.28   18.70
   3  -1 -18  200.58   23.40
   3  -1 -18   25.20  108.09
   3   1 -18  216.38   15.60
   3   1 -18   53.39  142.99
   3   1 -18  210.58   15.30
   3   1 -18  206.48   21.00
   1  -1 -18    4.70  122.79
  -1  -1  18   89.09   11.20
   1  -1 -18   80.09   11.30
   1  -1 -18   75.39   12.60
   1  -1 -18   72.89   10.30
   1   1 -18   -7.50  113.99
   1   1 -18   62.09   12.30
   1   1 -18   79.39   10.50
   1   1 -18   74.99   11.70
   1   1 -18   94.09    8.50
  -1   1  18   89.69   10.60
   1  -1  18   70.49   10.40
  -1  -1 -18  102.29   13.20
  -1  -1 -18   44.10  115.39
  -1  -1 -18  100.79   14.30
  -1  -1 -18  100.49   12.30
   1  -1  18   82.99   12.20
  -1   1 -18   83.49   14.70
  -1   1 -18  116.69   12.40
  -1   1 -18  113.89   13.90
   1   1  18  118.19   12.20
  -1   1 -18   75.69  131.19
   3  -1  18   30.20    6.20
   3  -1  18   32.80    8.10
   3  -1  18   27.50    6.60
  -3  -1 -18   17.50  120.99
  -3  -1 -18   25.70    5.90
  -3  -1 -18   32.00    7.60
  -3  -1 -18   31.70    6.50
  -3   1 -18   39.30    6.80
  -3   1 -18   29.30    8.30
   3   1  18   24.20    6.50
  -3   1 -18   38.90    7.30
   5  -1  18   31.00    5.40
  -5  -1 -18   26.40    5.60
   5  -1  18   24.60    6.00
  -5  -1 -18   24.30    6.20
  -5  -1 -18  -32.10   91.99
  -5   1 -18   41.30    7.30
   5   1  18   11.90    5.20
   7  -1  18    6.90    4.60
  -7  -1 -18   11.20    4.30
  -7   1 -18   19.30    5.60
  -9  -1 -18   12.70    4.20
  -9   1 -18   12.00    4.20
  24   2 -18    4.30    2.30
  22   2 -18    8.80    3.00
 -20  -2  18    7.60    7.00
  20   2 -18   -0.20    3.90
  20   2 -18    2.00    2.80
  20   2 -18    4.40    3.00
  18   2 -18   55.49    6.60
  18   2 -18   53.29    6.60
  18   2 -18   63.89    8.40
  16   2 -18   97.29   10.80
  16   2 -18  112.19    9.70
  16   2 -18   18.70  119.69
  16   2 -18  102.49    9.20
  14  -2 -18  113.19   15.40
  14  -2 -18  108.09   14.30
  14   2 -18  120.69  147.69
  14   2 -18  104.49    9.80
  14   2 -18   96.89   11.20
  14   2 -18   97.59    9.10
  12  -2 -18  182.18   21.90
  12  -2 -18  186.28   21.90
  12  -2 -18  167.88   18.80
  12   2 -18  186.58   16.00
  12   2 -18  189.68   14.30
  12   2 -18  173.98   18.80
  12   2 -18   48.00  149.19
  12   2 -18  183.38   13.90
  10  -2 -18  133.69   17.60
  10  -2 -18  127.09   16.70
  10  -2 -18  116.19   14.60
  10  -2 -18   36.10  108.49
  10   2 -18   73.59  150.08
  10   2 -18  125.79   10.90
  10   2 -18  149.59   15.20
  10   2 -18  130.79   13.10
  10   2 -18  136.69   11.30
   8  -2 -18  458.85   47.40
   8  -2 -18  417.06   42.30
   8  -2 -18  439.66   46.30
   8  -2 -18  147.39  141.59
   8   2 -18  523.35   42.60
   8   2 -18  436.06   30.70
   8   2 -18   82.19  171.28
   8   2 -18  452.05   30.50
   6  -2 -18    3.10    3.90
  -6  -2  18    1.90    5.70
   6  -2 -18   -3.10    3.40
   6  -2 -18    3.20    4.40
   6  -2 -18   17.90  107.99
   6   2 -18    7.80    3.60
   6   2 -18   -1.50    3.30
   6   2 -18   -3.90  147.99
   6   2 -18    2.30    4.90
   4  -2 -18   59.69   10.30
   4  -2 -18   64.99    9.80
   4  -2 -18   46.70  111.19
  -4  -2  18   73.79   10.30
   4  -2 -18   60.49   11.50
   4   2 -18   70.99   10.50
  -4   2  18   72.89    9.20
   4   2 -18   66.99    7.30
   4   2 -18   54.99    7.00
   4   2 -18   43.00  132.09
  -2  -2  18   65.79   10.30
   2  -2 -18   -2.60  113.69
   2  -2 -18   71.89   10.30
   2  -2 -18   60.49   10.40
   2  -2 -18   72.89   11.90
  -2   2  18   66.19    8.90
   2   2 -18   77.09   10.70
   2   2 -18   80.79    7.90
   2   2 -18   40.20  132.69
   2   2 -18   74.89    7.60
   0  -2 -18   54.89  123.29
   0  -2 -18   26.10    5.80
   0  -2  18   36.70    8.70
   0  -2 -18   39.20    7.40
   0  -2  18   10.30    5.80
   0  -2 -18   24.50    6.50
   0   2 -18   25.90  124.79
   0   2 -18   32.60    4.90
   0   2  18   35.50    7.00
   0   2 -18   28.90    6.40
  -2  -2 -18    8.90    4.60
  -2  -2 -18  -10.60  111.19
   2  -2  18    6.60    7.20
   2  -2  18    5.90    5.20
  -2  -2 -18   13.60    4.80
  -2  -2 -18   10.50    4.20
  -2   2 -18   16.20    4.80
   2   2  18   16.00    5.30
  -4  -2 -18  -11.50  102.99
   4  -2  18   65.19    9.70
  -4  -2 -18  105.99   12.60
  -4  -2 -18   93.29   12.30
  -4   2 -18  108.29   12.70
  -6  -2 -18   37.00    7.00
   6  -2  18   25.70    5.10
  -6  -2 -18   18.20  112.19
  -6   2 -18   44.50    7.40
  23   3 -18    7.30    2.30
  21   3 -18    4.40    2.60
  19  -3 -18   -3.50   17.30
  17  -3 -18    2.10   10.40
  17  -3 -18    2.70   20.30
  17   3 -18    3.40    4.30
  17   3 -18   -0.60    2.90
  17   3 -18   -2.10  108.09
  17   3 -18    1.20    2.80
  15  -3 -18   41.80   16.30
  15  -3 -18   97.29   13.70
  15  -3 -18   62.19   12.70
  15   3 -18   73.29    7.10
  15   3 -18   65.39    8.80
  15   3 -18   69.29    7.30
  15   3 -18   12.10  125.09
  13  -3 -18  105.39   14.80
  13  -3 -18   72.19   15.90
  13   3 -18   24.10  136.39
  13   3 -18  109.89   11.20
  13   3 -18  104.09    9.20
  13   3 -18   97.49    8.90
  11  -3 -18   74.49   12.00
  11   3 -18   54.89    9.60
  11   3 -18   56.69    7.00
  11   3 -18   40.50  145.49
  11   3 -18   57.59    7.00
   9  -3 -18   21.00    6.50
  -9  -3  18    9.80    6.20
   9  -3 -18   13.60    5.10
   9  -3 -18    6.40    5.50
   9   3 -18   75.69  146.49
   9   3 -18   15.10    6.00
   9   3 -18   16.80    4.20
   9   3 -18   16.10    4.20
   7  -3 -18  304.27   34.20
  -7  -3  18  277.97   24.90
   7  -3 -18    3.60  118.49
   7  -3 -18  320.57   34.10
   7  -3 -18  274.67   30.70
   7   3 -18  357.46   31.20
   7   3 -18  338.57   22.10
   7   3 -18   49.20  157.28
   7   3 -18  342.97   22.50
   5  -3 -18  195.08   22.40
   5  -3 -18   57.49  120.89
   5  -3 -18  212.98   24.50
  -5  -3  18  182.98   19.00
   5  -3 -18  207.38   24.80
   5   3 -18  239.98   23.00
   5   3 -18   31.10  142.89
   5   3 -18  233.58   15.90
   5   3 -18  239.38   16.40
   3  -3 -18    5.40    4.30
   3  -3 -18    7.80    4.80
  -3  -3  18    3.40    5.70
   3  -3 -18   -0.10    3.70
   3  -3 -18   29.30  120.59
   3   3 -18   24.20  119.99
   3   3 -18    8.00    5.50
   3   3 -18   11.20    3.40
   3   3 -18    9.50    3.90
   1  -3 -18   29.50    6.20
  -1  -3  18   36.40    8.00
   1  -3 -18  -40.30  107.19
   1  -3 -18   34.10    7.30
   1  -3 -18   43.20    7.90
   1   3 -18   28.60  107.69
   1   3 -18   38.80    7.30
   1  -3  18   -3.10    4.30
   1  -3  18    2.50    5.70
  -1  -3 -18   14.00  106.59
  -1  -3 -18   -1.50    3.70
  -1   3 -18   -2.20    5.90
   3  -3  18   16.50    5.00
  -3  -3 -18  -49.40   86.29
  -5  -3 -18   14.70    4.80
   5  -3  18    7.10    3.90
   5   3  18   -1.90   87.59
  18   4 -18   42.50   89.49
  16  -4 -18   67.89   15.70
  16   4 -18  -10.80   80.39
  14  -4 -18    7.80   10.80
  14   4 -18  -14.20   99.59
  12   4 -18   35.80  116.59
  12   4 -18   15.80    3.80
  10  -4 -18   12.90    7.80
  10   4 -18  -17.30  109.49
   8  -4 -18    5.60    6.30
   8   4 -18   22.00    4.20
   8   4 -18   48.00  109.19
   6  -4 -18   53.59    9.60
   6   4 -18   60.09    6.60
   6   4 -18    2.40  108.39
   4   4 -18   19.00  121.89
  -2  -4  18    2.50    4.20
  -2   4  18  -43.10   97.09
   0  -4 -18   15.40    5.30
   0   4  18   24.30  107.79
   2  -4  18    1.80    3.30
   2   4  18    3.90   77.99
  11  -5 -18   10.40    8.60
  11   5 -18   24.60   70.69
   9  -5 -18    9.10    5.80
   9   5 -18   -0.60  108.39
  14   0 -19    7.10    2.80
  12   0 -19   35.70  105.59
  10   0 -19   33.20    5.00
  10   0 -19   30.40  101.49
   8   0 -19  -85.79  100.49
   8   0 -19    3.90    2.90
   8   0 -19    5.00    3.30
   6   0 -19   78.59  136.39
   6   0 -19  368.26   23.80
   6   0 -19  332.37   32.80
   4   0 -19    6.60    3.80
   4   0 -19    4.30    4.50
   4   0 -19   13.20  115.79
   4   0 -19    4.00    3.90
   4   0 -19    4.60    3.50
   2   0 -19  225.98   22.70
   2   0 -19  227.38   25.30
   2   0 -19  229.68   16.80
   2   0 -19  -48.80  121.19
   2   0 -19  225.28   26.00
   0   0  19   90.49   11.20
   0   0 -19   43.50  125.39
   0   0 -19   77.69   10.30
   0   0 -19   72.79   13.10
   0   0 -19   82.99   12.00
  -2   0 -19   70.49   11.40
   2   0  19   75.79   10.30
  -2   0 -19   66.29   12.50
  -2   0 -19   81.49   10.00
  -2   0 -19  -27.90  101.29
  -4   0 -19   -0.20    4.00
   4   0  19   -0.30    4.60
  -4   0 -19    6.10    4.40
  -6   0 -19   23.30    5.70
  -8   0 -19   20.30    4.80
  25   1 -19   35.80    4.00
  23   1 -19   50.89    5.40
  21   1 -19  108.49    9.00
  21   1 -19  104.29   11.60
  19   1 -19   72.99    9.30
  19   1 -19   88.29    7.80
  17   1 -19   30.00    6.20
  17   1 -19   31.50    4.60
  17   1 -19   32.20    4.80
  15   1 -19   44.40    5.30
  15   1 -19   20.60  112.89
  15   1 -19   40.10    7.00
  15   1 -19   32.50    5.00
  13   1 -19  132.09   11.20
  13   1 -19  142.09   13.00
  13   1 -19  141.59   11.20
  13   1 -19   18.50  114.79
  11  -1 -19  344.47   34.70
  11  -1 -19   59.69  115.99
  11   1 -19  382.36   25.30
  11   1 -19  396.46   25.30
  11   1 -19  368.76   34.60
  11   1 -19  195.88  149.69
  11   1 -19  358.66   26.90
   9  -1 -19   44.00    7.20
   9  -1 -19   27.20    6.90
   9  -1 -19   32.40    4.90
   9  -1 -19   36.40  116.59
   9  -1 -19   39.40    7.90
   9   1 -19   41.40    7.30
   9   1 -19   40.80    5.60
   9   1 -19   45.00    5.40
   9   1 -19   53.59  135.89
   7  -1 -19   50.79    8.90
   7  -1 -19   31.10    6.50
   7  -1 -19  -10.40  121.09
   7  -1 -19   27.60    7.30
  -7  -1  19   42.40    7.90
   7  -1 -19   42.10    5.40
   7   1 -19   40.80    6.00
   7   1 -19   65.89  134.79
   7   1 -19   42.10    5.40
   7   1 -19   45.40    7.50
  -5  -1  19  401.06   26.70
   5  -1 -19   -3.10  117.79
   5  -1 -19  291.87   34.80
   5  -1 -19  320.57   35.40
   5  -1 -19  296.27   31.60
   5   1 -19  340.57   23.00
   5   1 -19  353.36   31.80
   5   1 -19   27.40  137.59
   5   1 -19  349.37   23.20
  -3  -1  19  371.46   26.20
   3  -1 -19  278.47   34.00
   3  -1 -19  295.77   30.80
   3  -1 -19  326.17   34.50
   3  -1 -19   40.50  128.89
   3   1 -19   70.59  146.39
   3   1 -19  334.47   22.50
   3   1 -19  333.07   30.90
  -3   1  19  329.57   24.20
  -1  -1  19   73.29   10.10
   1  -1 -19  105.79   12.50
   1  -1 -19   95.59   13.40
   1  -1 -19  -51.39  101.59
   1  -1 -19   87.59   14.80
   1   1 -19  115.99   13.50
   1   1 -19   66.29  124.49
  -1   1  19  111.59   11.90
   1   1 -19  113.99    9.60
   1   1 -19  106.99   12.40
  -1  -1 -19   64.89   10.10
   1  -1  19   40.00    7.20
  -1  -1 -19   68.99    9.20
  -1  -1 -19   22.50  108.39
  -1  -1 -19   66.99   11.30
  -1   1 -19   66.89    9.00
  -1   1 -19  -31.80   98.19
   1   1  19   62.49    8.80
  -1   1 -19   62.49   10.40
   3  -1  19    5.80    4.50
  -3  -1 -19    9.10    4.20
  -3  -1 -19   11.60    4.70
  -3  -1 -19   20.40  109.49
  -3  -1 -19    6.20    4.60
   3  -1  19    4.80    4.90
  -3   1 -19   15.30    5.50
   3   1  19    2.40    4.60
  -3   1 -19    5.30    3.70
  -5  -1 -19    5.50    3.90
  -5  -1 -19  -26.10  101.49
  -5   1 -19    8.00    5.10
  -7  -1 -19    8.90    3.90
  -7   1 -19   12.50    4.70
  24   2 -19    4.30    2.10
  22   2 -19   30.90    4.10
  20   2 -19    8.90    3.10
  18   2 -19  103.89   10.70
  18   2 -19  106.79    9.20
  18   2 -19  101.09    9.00
  16   2 -19  139.89   10.10
  16   2 -19  100.89   11.50
  16   2 -19  109.19   10.10
  16   2 -19   52.59  133.89
  14   2 -19   45.00    5.80
  14   2 -19    0.50  121.39
  14   2 -19   48.10    7.40
  14   2 -19   53.29    6.70
  12  -2 -19   60.69    9.60
  12  -2 -19   83.69   12.50
  12  -2 -19   87.69   12.80
  12   2 -19   63.59    7.30
  12   2 -19   80.79    7.90
  12   2 -19   60.99    9.60
  12   2 -19   67.19    9.20
  12   2 -19   65.59  149.79
  10  -2 -19  159.18   19.70
  10  -2 -19  146.79   17.30
  10  -2 -19   32.10  104.09
  10  -2 -19  168.18   20.50
  10   2 -19  167.88   13.10
  10   2 -19  -38.80  139.09
  10   2 -19  171.28   17.50
  10   2 -19  156.78   12.60
  -8  -2  19  220.88   19.40
   8  -2 -19  215.18   24.80
   8  -2 -19  187.98   22.10
   8  -2 -19  220.78   25.30
   8  -2 -19   11.50  104.89
   8   2 -19  212.98   16.10
   8   2 -19  229.18   16.40
   8   2 -19  111.99  165.58
   8   2 -19  247.98   22.60
   6  -2 -19   28.40    7.70
   6  -2 -19  -10.50   99.89
   6  -2 -19   30.60    6.70
  -6  -2  19   33.50    7.80
   6  -2 -19   23.90    6.20
   6   2 -19   31.90  133.39
   6   2 -19   30.40    5.30
   6   2 -19   30.10    5.00
   6   2 -19   20.80    6.00
   4  -2 -19  170.98   18.40
   4  -2 -19   -4.90   99.79
   4  -2 -19  161.78   19.80
  -4  -2  19  166.78   16.70
   4  -2 -19  169.78   20.60
  -4   2  19  166.98   14.60
   4   2 -19  162.48   13.20
   4   2 -19  191.28   18.60
   4   2 -19  169.28   13.20
   4   2 -19   93.89  143.09
  -2  -2  19   67.59   10.80
   2  -2 -19   72.69   10.50
   2  -2 -19    5.70  103.59
   2  -2 -19   78.89   11.30
   2  -2 -19   74.69   12.50
   2   2 -19   91.99   10.90
   2   2 -19   -8.20  117.79
  -2   2  19   70.69    9.40
   2   2 -19   79.99    7.90
   0  -2 -19  -13.10   99.79
   0  -2 -19  120.39   14.80
   0  -2 -19  141.29   16.30
   0  -2 -19  136.29   17.10
   0   2 -19  122.69   10.60
   0   2  19  125.59   12.60
   0   2 -19  159.98   15.40
   0   2 -19   80.59  118.99
   2  -2  19   20.20    5.90
  -2  -2 -19   44.90    8.50
   2  -2  19   19.10    8.90
  -2  -2 -19   37.10  114.49
  -2  -2 -19   44.40    7.40
   2   2  19   34.70    5.90
  -4  -2 -19  -34.10   95.69
  21   3 -19   10.00    2.60
  19   3 -19    8.80    2.90
  17  -3 -19   21.90   11.90
  17   3 -19   19.00  106.29
  15  -3 -19   23.50    9.70
  15   3 -19   36.60    6.30
  15   3 -19   59.59  125.79
  15   3 -19   28.20    4.60
  15   3 -19   22.70    4.00
  13  -3 -19  125.79   13.90
  13  -3 -19   74.09   13.80
  13   3 -19   93.59    8.60
  13   3 -19   98.29    8.90
  13   3 -19   32.50  135.19
  11  -3 -19   37.30    9.00
  11  -3 -19   59.79   10.30
 -11  -3  19   36.80    7.60
  11   3 -19  -25.80  133.09
  11   3 -19   45.50    5.80
  11   3 -19   41.30    7.60
  11   3 -19   36.00    5.30
   9  -3 -19  -43.80   93.99
  -9  -3  19   36.20    7.80
   9  -3 -19   26.80    7.40
   9   3 -19   -0.60  126.09
   9   3 -19   50.39    8.60
   9   3 -19   48.70    6.00
   7  -3 -19  -22.10   99.09
  -7  -3  19   16.60    6.40
   7  -3 -19    6.00    4.20
   7  -3 -19   19.20    5.90
   7  -3 -19    4.30    5.00
   7   3 -19   -0.10  123.49
   7   3 -19   11.80    5.30
   7   3 -19   13.00    3.90
   7   3 -19   10.20    3.50
   5  -3 -19   53.29  120.09
   5  -3 -19   75.09   12.00
   5  -3 -19   87.69   13.10
   5  -3 -19   80.69   11.20
  -5  -3  19   81.39   11.00
   5   3 -19   96.59   11.90
   5   3 -19   90.09    8.60
   5   3 -19   15.40  129.09
   5   3 -19   92.39    8.10
  -3  -3  19   58.79    9.70
   3  -3 -19   54.09    9.80
   3  -3 -19    5.30  105.19
   3  -3 -19   64.79    9.30
   3  -3 -19   67.29   10.80
   3   3 -19   70.89    9.70
   3   3 -19   16.70  115.69
   1  -3 -19   -0.70    3.50
  -1  -3  19   -0.20    4.30
   1  -3 -19  -21.30   94.99
   1   3 -19    0.90   89.59
  -1  -3 -19   39.70   97.79
   1  -3  19   -3.60    4.50
  -1  -3 -19   13.60    4.60
  -3  -3 -19   10.80    4.40
   3  -3  19    1.60    4.00
  18   4 -19   -0.70    2.80
  16   4 -19   64.79   81.49
  14  -4 -19   29.00   10.50
  14   4 -19   26.10   95.99
  12  -4 -19   13.60    8.40
  12   4 -19    4.70   91.79
  10  -4 -19   -9.10    5.80
  10   4 -19  -24.10   91.19
  10   4 -19    5.10    3.20
   8  -4 -19   -1.10    5.50
   8   4 -19   11.00    3.60
   8   4 -19   37.50  104.59
   6   4 -19   72.19  105.39
  -6   4  19    6.70  106.49
  -4  -4  19    4.00    4.20
   4   4 -19   23.30  105.49
  -4   4  19   17.40  126.69
  -2  -4  19    0.60    3.80
  -2   4  19    6.80  104.59
   0  -4  19   -1.30    3.30
   0   4  19   -7.30   80.59
  14   0 -20   13.80    3.30
  14   0 -20   36.20  106.09
  12   0 -20   90.79    8.40
  12   0 -20   53.49  109.09
  12   0 -20  101.09   11.60
  10   0 -20   20.40    4.10
  10   0 -20   25.40    5.70
  10   0 -20   -5.80  111.49
   8   0 -20   19.90  128.79
   8   0 -20   49.60    6.10
   8   0 -20   40.20    7.40
   6   0 -20  -31.70  117.19
   6   0 -20   10.80    3.80
   4   0 -20    8.00    4.30
   4   0 -20    1.90    3.30
   4   0 -20   19.00  131.19
   4   0 -20    4.50    3.40
   2   0 -20  155.58   18.10
   2   0 -20  147.29   18.70
   2   0 -20  144.79   16.10
   2   0 -20   13.60  119.79
   0   0 -20   71.99   11.40
   0   0 -20   66.49   10.70
   0   0 -20   64.29    9.00
   0   0  20   46.80    8.30
   0   0 -20   54.19  120.49
   2   0  20    5.60    4.90
  -2   0 -20    5.00    4.70
  -2   0 -20    6.30    4.10
  -2   0 -20   -7.90   85.89
  -4   0 -20    0.70    4.20
  -6   0 -20   91.09   11.60
  23   1 -20   38.10    4.50
  21   1 -20    5.50    2.80
  19   1 -20   35.10    6.10
  19   1 -20   31.50    4.50
  17   1 -20  144.99   11.50
  17   1 -20  139.39   11.50
  17   1 -20  164.28   13.50
  15   1 -20   64.39  120.89
  15   1 -20   16.00    3.80
  15   1 -20   14.70    5.20
  15   1 -20   14.20    3.80
  13   1 -20   31.60  124.39
  13   1 -20  145.59   11.70
  13   1 -20  147.79   13.20
  13   1 -20  138.59   11.40
  11  -1 -20   19.00    5.10
  11  -1 -20   30.80  109.39
  11   1 -20   20.30    5.30
  11   1 -20   19.10  116.89
  11   1 -20   22.90    4.30
  11   1 -20   23.60    4.70
   9  -1 -20   65.69    9.70
   9  -1 -20   43.00    8.00
   9  -1 -20   42.20    5.80
  -9  -1  20   53.89    8.50
   9  -1 -20   70.89    9.60
   9  -1 -20  -40.40   92.39
   9   1 -20   46.10    5.90
   9   1 -20   54.79    6.80
   9   1 -20   53.29    8.20
   9   1 -20   62.39  125.59
   7  -1 -20  164.28   19.20
   7  -1 -20  140.79   19.30
   7  -1 -20   29.90  105.29
  -7  -1  20  179.48   15.80
   7  -1 -20  148.49   17.10
   7   1 -20  157.68   12.40
   7   1 -20  174.88   13.10
   7   1 -20  166.18   17.20
   7   1 -20    9.70  137.89
   5  -1 -20   93.89   14.50
  -5  -1  20  119.39   15.70
   5  -1 -20   24.40  128.39
   5  -1 -20   88.09   11.80
   5  -1 -20  104.99   13.70
   5   1 -20  103.59    9.40
   5   1 -20   13.90  120.59
   5   1 -20   89.39   11.80
   5   1 -20  103.89    9.00
   3  -1 -20  -12.30  111.59
   3  -1 -20   59.69   11.70
   3  -1 -20   72.89   10.90
   3  -1 -20   56.69    9.00
   3   1 -20   67.19    9.30
   3   1 -20   74.89    7.70
   3   1 -20  -31.90  119.09
  -3   1  20   54.49    8.30
   1  -1 -20   25.20  107.89
   1  -1 -20  213.88   22.10
   1  -1 -20  176.48   19.60
   1  -1 -20  178.18   22.30
   1   1 -20  201.48   19.80
  -1   1  20  177.38   16.20
   1   1 -20   51.69  120.49
  -1  -1 -20   49.70  113.99
  -1  -1 -20   62.69    8.80
  -1  -1 -20   66.99   10.40
  -1  -1 -20   68.39   11.20
  -1   1 -20   64.79    8.90
  -1   1 -20   38.50  100.69
  -1   1 -20   71.39   10.20
   1   1  20   42.30    7.70
  -3  -1 -20   11.80  102.29
  -3  -1 -20   40.30    8.50
  -3   1 -20   50.69    8.60
  -5  -1 -20   20.10    5.20
  -5   1 -20   32.80    6.20
  -7  -1 -20   17.80    4.00
  24   2 -20    7.60    2.70
  22   2 -20   62.99    5.80
  20   2 -20   59.99    6.00
  18   2 -20   24.00    3.90
  18   2 -20   13.50    4.90
  16   2 -20   30.90  113.59
  16   2 -20  126.89   10.60
  16   2 -20  136.99   12.50
  16   2 -20  137.79   11.00
  14   2 -20  -55.49  109.69
  14   2 -20   11.50    3.50
  14   2 -20   13.70    4.00
  14   2 -20    9.30    5.00
  12  -2 -20   16.50    5.20
  12  -2 -20   22.60    6.10
  12   2 -20   18.00  134.99
  12   2 -20   11.00    3.70
  12   2 -20   14.80    4.70
  12   2 -20   21.90    4.20
  10  -2 -20  191.08   22.50
  10  -2 -20   36.20   97.49
  10  -2 -20  162.88   19.50
  10  -2 -20  194.88   22.80
 -10  -2  20  197.58   17.40
  10   2 -20  188.58   14.40
  10   2 -20  206.88   19.80
  10   2 -20  -16.10  138.89
  10   2 -20  200.08   14.70
   8  -2 -20   56.39   10.80
  -8  -2  20   60.09    9.50
   8  -2 -20   57.59    9.10
   8  -2 -20   65.39   11.80
   8  -2 -20   15.50   96.99
   8   2 -20   60.09    9.50
   8   2 -20   12.60  138.59
   8   2 -20   70.69    7.50
   8   2 -20   60.99    7.00
  -6  -2  20    0.40    5.70
   6  -2 -20    6.30    4.00
   6  -2 -20    4.30    4.30
   6  -2 -20   -5.70   89.09
   6  -2 -20    7.20    4.70
   6   2 -20    7.90    3.80
   6   2 -20    0.10  127.39
   6   2 -20    7.40    4.60
   6   2 -20    7.10    3.60
  -4  -2  20  119.49   14.40
   4  -2 -20   80.79  115.49
   4  -2 -20  153.38   18.10
   4  -2 -20  129.79   15.40
   4  -2 -20  141.89   17.10
   4   2 -20  146.79   11.40
  -4   2  20  124.59   12.50
   4   2 -20  132.59   11.30
   4   2 -20  151.18   15.80
   4   2 -20   43.80  134.09
   2  -2 -20   97.19   12.70
   2  -2 -20  108.49   14.90
   2  -2 -20   64.99  117.19
   2  -2 -20  108.79   14.00
   2   2 -20  124.69    9.60
  -2   2  20   86.09   10.60
   2   2 -20   16.50  111.69
   2   2 -20  133.59   13.40
   0  -2 -20   59.39    9.70
   0  -2 -20   49.60    8.80
   0  -2 -20  -25.20   91.19
   0   2  20   57.89   10.20
   0   2 -20   43.30   96.79
   2  -2  20    1.90    4.60
  -2  -2 -20  -13.90   89.69
  -2  -2 -20    2.40    3.50
  -4  -2 -20  -58.29  106.19
   4  -2  20   17.00    5.00
  21   3 -20   50.39    4.80
  19   3 -20  124.39    9.50
  17  -3 -20   46.10   13.30
  17   3 -20   54.09    5.50
  17   3 -20   43.10   97.29
  15  -3 -20   22.30    9.70
  15   3 -20   -0.30  103.39
  15   3 -20    8.50    3.10
 -13  -3  20   -1.40    4.60
  13  -3 -20   -3.50    7.10
  13   3 -20   -0.40    2.70
  13   3 -20    1.50    2.80
  13   3 -20  -24.10  113.29
 -11  -3  20   43.00    7.90
  11  -3 -20   56.89   10.70
  11   3 -20   59.19    6.30
  11   3 -20   55.79    6.30
  11   3 -20   18.10  120.49
  11   3 -20   64.19   12.20
   9  -3 -20   31.80    8.00
  -9  -3  20   21.60    6.60
   9  -3 -20   51.09    9.20
   9  -3 -20  -26.20   84.59
   9   3 -20   44.50  119.59
   9   3 -20   32.30    5.00
   9   3 -20   29.70    6.70
   9   3 -20   37.20    5.10
  -7  -3  20   29.80    7.10
   7  -3 -20   14.90    6.00
   7  -3 -20   28.10    6.20
   7  -3 -20  -21.60   92.79
   7   3 -20   31.30    4.80
   7   3 -20   -9.70  119.69
   7   3 -20   31.60    6.40
  -5  -3  20   35.10    8.10
   5  -3 -20   11.80  102.49
   5  -3 -20   36.20    7.30
   5  -3 -20   34.60    6.90
   5  -3 -20   61.49    9.80
   5   3 -20   36.20    7.30
   5   3 -20  -22.00   98.29
  -3  -3  20    1.60    4.50
   3  -3 -20   -1.70    3.50
   3  -3 -20    4.10   94.39
   3   3 -20   -3.30  107.69
   1  -3 -20    1.30   82.69
  -1  -3  20    4.50    4.70
   1  -3 -20   12.40    4.40
  -1  -3 -20    5.20    3.60
   1  -3  20    4.20    4.10
  -1  -3 -20  -10.50   79.49
   3   3  20   21.90   74.19
  16   4 -20  -37.80   57.49
  16   4 -20    6.40    2.70
  14  -4 -20   16.30    8.80
  14   4 -20   28.20    3.80
  14   4 -20   16.30   83.39
  12  -4 -20   25.10    8.30
  12   4 -20   37.20    4.70
  12   4 -20   26.70   80.99
  10  -4 -20   11.30    6.30
  10   4 -20    1.10   78.09
  10   4 -20   23.40    3.90
   8  -4 -20   44.50    8.30
   8   4 -20   -2.50   85.69
   8   4 -20   48.40    5.50
   6  -4 -20   18.30    5.40
  -6  -4  20    2.50    4.00
   6   4 -20   64.79   97.79
  -6   4  20   11.60  126.19
  -4   4  20   37.60   91.69
   4   4 -20   76.39   85.59
  -2  -4  20    5.20    3.40
  -2   4  20   -8.30   72.59
  14   0 -21  -20.30   92.39
  14   0 -21    2.30    3.60
  12   0 -21   52.39    6.10
  12   0 -21   57.49    8.20
  12   0 -21   58.99  109.59
  10   0 -21    7.10    3.00
  10   0 -21   11.90  113.29
  10   0 -21    6.40    3.50
   8   0 -21   34.20  116.29
   8   0 -21  163.28   12.40
   8   0 -21  153.28   16.70
   6   0 -21    9.80    4.20
   6   0 -21    0.10  121.79
   6   0 -21    7.90    3.50
   4   0 -21  295.57   30.00
   4   0 -21  332.97   33.50
   4   0 -21  101.09  134.29
   2   0 -21   10.20    3.90
   2   0 -21    1.10  113.99
   2   0 -21   10.50    4.90
  -2   0  21   10.80    5.60
   0   0 -21   95.79   12.80
   0   0 -21    6.60   93.89
   0   0  21   88.49   11.20
   0   0 -21  128.89   14.40
  -2   0 -21  -28.00   86.49
  -2   0 -21    7.30    4.80
  -4   0 -21   11.00    4.60
  23   1 -21   81.39    6.60
  21   1 -21   16.10    3.20
  19   1 -21   53.09    5.70
  17   1 -21  324.27   21.60
  17   1 -21  304.57   21.20
  17   1 -21  304.77   23.00
  15   1 -21   54.19    6.40
  15   1 -21   42.60    7.00
  15   1 -21   36.80  110.49
  15   1 -21   44.50    5.90
  13   1 -21  105.49    9.30
  13   1 -21  105.89    9.10
  13   1 -21   46.20  117.89
  11  -1 -21    4.50    3.60
  11  -1 -21  -32.70  100.79
  11   1 -21    4.90    3.40
  11   1 -21    3.40    3.00
  11   1 -21    3.70    3.40
  11   1 -21  -26.70  108.39
   9  -1 -21  491.75   50.79
   9  -1 -21  590.14   56.89
   9   1 -21  521.65   50.69
   9   1 -21  581.24   37.00
   9   1 -21  151.38  150.48
   9   1 -21  601.14   36.70
   7  -1 -21   31.20  109.49
   7  -1 -21  224.58   24.30
   7  -1 -21  254.57   27.40
   7   1 -21  159.78  157.28
   7   1 -21  254.67   18.00
   7   1 -21  247.08   17.60
   7   1 -21  256.77   24.50
   5  -1 -21    6.70   98.19
   5  -1 -21   83.29   11.40
   5  -1 -21   54.69    8.90
   5  -1 -21   65.69   10.60
   5   1 -21   83.29    7.70
   5   1 -21   61.79    9.10
   5   1 -21   28.00  122.99
  -5   1  21   44.30    7.60
   3  -1 -21   72.39   11.50
   3  -1 -21   67.09    9.50
   3  -1 -21   26.80  102.89
   3   1 -21   -1.80  120.39
   3   1 -21   79.49    7.90
   3   1 -21   79.99    9.90
  -3   1  21   69.79    9.30
   1  -1 -21   66.99   10.50
   1  -1 -21   60.59    8.50
  -1  -1  21   47.70    8.30
   1  -1 -21   44.20  105.29
  -1   1  21   47.30    7.90
   1   1 -21   48.80  117.69
   1   1 -21   68.19    8.80
  -1  -1 -21   18.60    5.60
  -1  -1 -21   18.50   94.39
  -1   1 -21  -33.40  108.69
  -3  -1 -21    6.50  120.79
  -3  -1 -21   38.10    7.30
  22   2 -21   36.40    4.10
  20   2 -21   36.80    4.40
  18   2 -21   58.09    6.00
  16   2 -21  194.88   14.60
  16   2 -21  194.18   13.90
  16   2 -21   11.20  109.49
  16   2 -21  176.18   15.60
  14   2 -21   32.70    5.10
  14   2 -21   51.79    5.80
  14   2 -21    0.10  101.79
  12  -2 -21  164.08   17.50
  12  -2 -21  129.89   14.90
 -12  -2  21  132.79   13.40
  12   2 -21  112.79   15.40
  12   2 -21  137.49   11.20
  12   2 -21   36.30  132.19
  12   2 -21  140.29   11.00
 -10  -2  21  147.49   14.00
  10  -2 -21  137.39   17.40
  10  -2 -21   14.10   91.59
  10  -2 -21  119.59   14.70
  10   2 -21  138.09   14.80
  10   2 -21   29.60  125.39
  10   2 -21  137.49   11.20
  10   2 -21  131.89   10.90
   8  -2 -21  111.79   15.60
  -8  -2  21   87.29   12.40
   8  -2 -21  145.49   15.40
   8  -2 -21  103.49   13.30
   8  -2 -21   -2.10   82.99
   8   2 -21  125.79   10.20
   8   2 -21  122.79   13.60
   8   2 -21  110.39    9.80
   8   2 -21   27.90  134.19
  -6  -2  21   19.70    6.70
   6  -2 -21  -40.80   90.09
   6   2 -21  -76.99  111.99
   4  -2 -21   55.39    9.10
   4  -2 -21   27.90    6.20
   4  -2 -21  -36.70   85.69
  -4  -2  21   35.00    7.70
   4  -2 -21   38.10    7.20
  -4   2  21   30.00    7.00
   4   2 -21   37.20    7.10
   4   2 -21   19.90  112.49
   4   2 -21   39.50    5.40
   2  -2 -21   -3.10   94.79
   2  -2 -21   12.10    4.70
  -2  -2  21    5.70    5.10
   2   2 -21   14.40  103.49
   0  -2 -21   33.60  100.89
  -2  -2 -21  -30.80   87.39
  -2  -2 -21    7.10    3.50
   2  -2  21    0.80    5.10
  19   3 -21   28.50    3.70
  17   3 -21   50.69    5.30
  17   3 -21   33.00   82.59
  15   3 -21   10.50   93.39
  15   3 -21    5.40    2.80
  13  -3 -21   24.70    8.90
  13   3 -21   -3.90   97.99
  13   3 -21   37.80    4.80
  11  -3 -21    3.30    7.00
  11   3 -21   12.20    3.50
  11   3 -21  -18.10   99.69
   9  -3 -21   -9.80   79.89
   9  -3 -21    1.70    6.00
   9   3 -21   13.70    3.70
   9   3 -21   25.00  108.29
   7  -3 -21   25.80   87.99
   7  -3 -21   37.70    7.60
   7   3 -21    5.30  105.49
   5  -3 -21    3.30    4.30
   5  -3 -21    6.20   85.29
   5   3 -21   10.30  102.19
   3  -3 -21    0.90    3.60
  -3  -3  21    4.10    4.60
   3  -3 -21   -4.50   76.59
   3   3 -21   70.89  117.89
  -1  -3  21    3.50    4.10
   1  -3 -21    9.90   76.79
   1  -3  21   -5.60    3.40
  -1  -3 -21    6.60    3.70
  14   4 -21   -7.80   51.79
  12  -4 -21    7.50    5.30
  12   4 -21    0.90    2.40
  12   4 -21   17.90   71.39
  10   4 -21   31.50    4.20
  10   4 -21   70.19   88.69
   8  -4 -21   16.80    4.20
  -8  -4  21    0.60    3.30
   8   4 -21    8.30   68.69
  14   0 -22    6.30   96.89
  12   0 -22  149.29   11.20
  12   0 -22   34.40  112.99
  12   0 -22  141.29   15.50
  10   0 -22  -11.20   96.29
  10   0 -22    2.00    2.80
  10   0 -22   -0.10    2.70
   8   0 -22  -36.40   99.49
   6   0 -22  -25.10   98.59
   6   0 -22    5.50    3.30
   4   0 -22  -15.30  103.99
  -4   0  22    4.10    4.70
   4   0 -22    2.60    3.20
   2   0 -22    7.70   96.19
  -2   0  22   14.20    8.00
   2   0 -22   20.70    5.80
   0   0 -22   -1.20   85.19
  -2   0 -22  -12.20  105.49
  21   1 -22    6.00    2.40
  19   1 -22   80.49    6.90
  17   1 -22  105.59    8.70
  15   1 -22    6.00    3.10
  15   1 -22   23.80  105.69
  15   1 -22    3.30    2.60
  13  -1 -22   27.80  106.39
  13   1 -22  -26.60   97.89
  11  -1 -22   -7.50   91.79
  11  -1 -22   44.70    7.40
  11   1 -22   47.50    6.10
  11   1 -22   38.40    7.00
  11   1 -22   16.00  113.39
  11   1 -22   44.20    5.40
   9  -1 -22    9.60  100.99
   9  -1 -22   81.69   10.70
   9   1 -22  -22.10  105.79
   9   1 -22   85.09   10.70
   9   1 -22  102.49    8.60
  -9   1  22   76.19    9.10
   7  -1 -22   29.30    6.10
   7  -1 -22  -20.10   81.69
   7  -1 -22   26.50    5.80
   7   1 -22   15.80    4.50
   7   1 -22   28.90    4.90
  -7   1  22   16.70    5.10
   7   1 -22  -16.10  115.89
   5  -1 -22   12.90    5.10
   5  -1 -22   22.60  100.79
   5  -1 -22    7.90    3.80
   5   1 -22   12.40    4.10
   5   1 -22  -65.69  100.89
  -5   1  22    9.70    4.70
   5   1 -22   12.90    3.80
   3  -1 -22  -24.20   82.59
   3   1 -22  -32.20  101.49
   1  -1 -22   48.70    8.50
   1  -1 -22   13.50   84.29
   1   1 -22   36.90  105.19
  -1  -1 -22   26.40   99.69
  -1   1 -22   33.80  129.09
  -3  -1 -22   16.90    4.00
  20   2 -22   24.10    3.50
  18   2 -22   20.80    3.40
  16   2 -22  -16.60   84.99
  14   2 -22  166.18   12.30
  14   2 -22   61.09  118.49
  12   2 -22   -0.70    2.90
  12   2 -22  -39.40  103.29
  12   2 -22    1.90    2.80
  10  -2 -22   16.60   78.69
  10  -2 -22  116.79   15.80
  10  -2 -22  131.79   16.80
  10   2 -22  142.59   10.80
  10   2 -22  130.59   16.10
  10   2 -22   18.20  118.49
  10   2 -22  156.88   11.20
   8  -2 -22   16.60    6.30
   8  -2 -22   14.30    5.10
   8  -2 -22  -14.80   75.39
   8   2 -22   28.90    4.60
   8   2 -22   14.70    6.00
   8   2 -22   22.40    4.70
   8   2 -22   13.70  108.89
   6  -2 -22   -1.90    4.90
   6  -2 -22  -26.20   79.29
   6   2 -22   -4.40  105.09
  -4  -2  22    7.90    5.30
   4  -2 -22  -12.40   81.89
   4   2 -22  -36.00   91.19
  -2  -2  22   14.40    5.10
   2  -2 -22  -35.40   81.29
   2   2 -22  -40.30  100.99
   0  -2 -22   -8.20   80.49
   0  -2  22    9.70    4.60
  17   3 -22   15.10   51.79
  15   3 -22   37.50   77.99
  15   3 -22   21.70    3.50
  13   3 -22  -47.40   81.49
  13   3 -22    7.80    2.90
  11  -3 -22   19.30    6.80
  11   3 -22   20.70    3.60
  11   3 -22   12.30   97.89
   9  -3 -22    0.40   74.39
   9  -3 -22    9.20    5.70
   9   3 -22   25.00  101.69
   9   3 -22    7.40    3.10
   7  -3 -22   36.10   78.09
   7   3 -22   28.10  100.19
   5  -3 -22   -5.20   69.09
   5  -3 -22    1.10    3.60
  -5  -3  22   -1.90    4.20
   5   3 -22   29.80  100.29
   3  -3 -22   15.10   69.59
  -3  -3  22    6.30    4.00
   3  -3 -22   12.70    3.60
  14   0 -23  -11.80   86.99
  12   0 -23   11.20    3.60
  12   0 -23    6.80   93.39
  12   0 -23    9.20    4.70
  10   0 -23  -23.50  101.59
  10   0 -23    0.80    2.70
  10   0 -23    0.70    2.80
   8   0 -23   15.90    3.90
   8   0 -23  -24.90   94.39
   8   0 -23    7.00    3.50
   6   0 -23  -24.10   93.29
   4   0 -23  -41.30   90.09
   2   0 -23  -30.80   83.69
   0   0 -23   28.90   90.69
  15   1 -23  -10.30   94.89
  13  -1 -23    6.80   67.59
  13   1 -23   26.70  102.79
  11  -1 -23   -5.10   82.29
  11   1 -23  125.59  131.69
  11   1 -23  139.89   11.10
   9  -1 -23    4.50   79.69
   9   1 -23  -24.60  100.79
   7  -1 -23   19.40   83.99
   7   1 -23  -19.90   89.39
   5  -1 -23   35.80    7.40
   5  -1 -23  -39.00   75.89
   5   1 -23   35.50  111.79
[truncated: 2,980 more chars]
