# Supplementary material for: Chiral Polymers from Norbornenes Based on Renewable Chemical Feedstocks
Source: Polymers (Basel). 2022 Dec 13;14(24):5453. doi: 10.3390/polym14245453 (PMC9786787; doi:10.3390/polym14245453)
Supplement: Supplementary file 1 [file polymers-14-05453-s001.zip › polymers-2047226-supplementary.pdf]

## Supplementary Material

# Chiral polymers from norbornenes based on renewable chemical feedstocks

Ivan V. Nazarov <sup>1</sup>, Danil P. Zarezin <sup>1</sup>, Ivan A. Solomatov <sup>1</sup>, Anastasya A. Danshina <sup>2,3</sup>, Yulia V. Nelyubina <sup>2</sup>,  
Igor R. Ilyasov <sup>4</sup> and Maxim V. Bermeshev <sup>1,\*</sup>

<sup>1</sup> A.V. Topchiev Institute of Petrochemical Synthesis, RAS, 29 Leninskiy Pr., 119991 Moscow, Russia

<sup>2</sup> A.N. Nesmeyanov Institute of Organoelement Compounds, Russian Academy of Sciences, Vavilov Street 28, 119991 Moscow, Russia

<sup>3</sup> Moscow Institute of Physics and Technology, National Research University, Institutskiy Per., 9, 141700 Dolgoprudny, Russia

<sup>4</sup> Nelubin Institute of Pharmacy, Sechenov First Moscow State Medical University, Trubetskaya Str. 8/2, 119991 Moscow, Russia

\* Correspondence: bmv@ips.ac.ru; Tel.: +7-495-647-59-27 (ext.379)

### *Table of contents*

|                                                        |    |
|--------------------------------------------------------|----|
| NMR spectra of the monomers.....                       | 2  |
| ESI-HRMS spectra of the monomers .....                 | 9  |
| X-ray diffraction data for M1 and M2.....              | 12 |
| NMR spectra of the ROMP polymers .....                 | 13 |
| CD spectra of the monomers and the ROMP polymers ..... | 20 |
| DSC curves of the polymers.....                        | 23 |
| TGA curves of the ROMP polymers .....                  | 24 |
| WAXD study of MP1 .....                                | 27 |

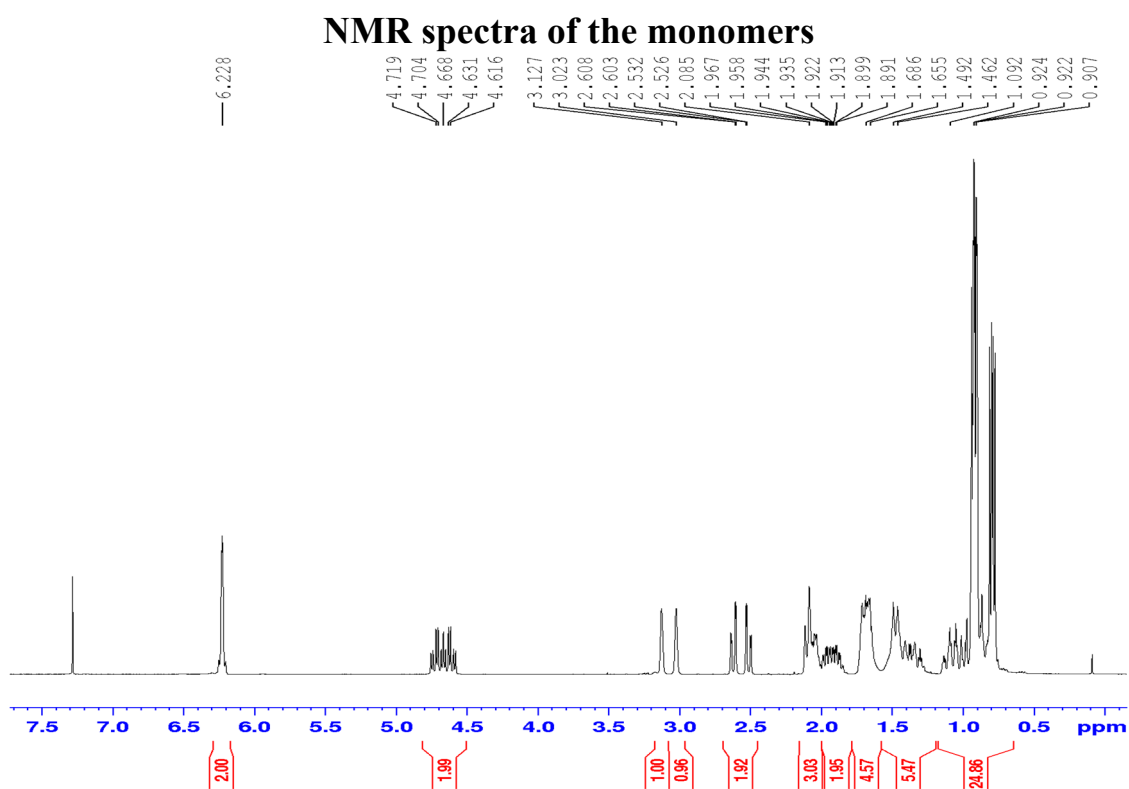

**Figure S1.**  $^1\text{H}$  NMR spectrum of **M1** ( $\text{CDCl}_3$ ).

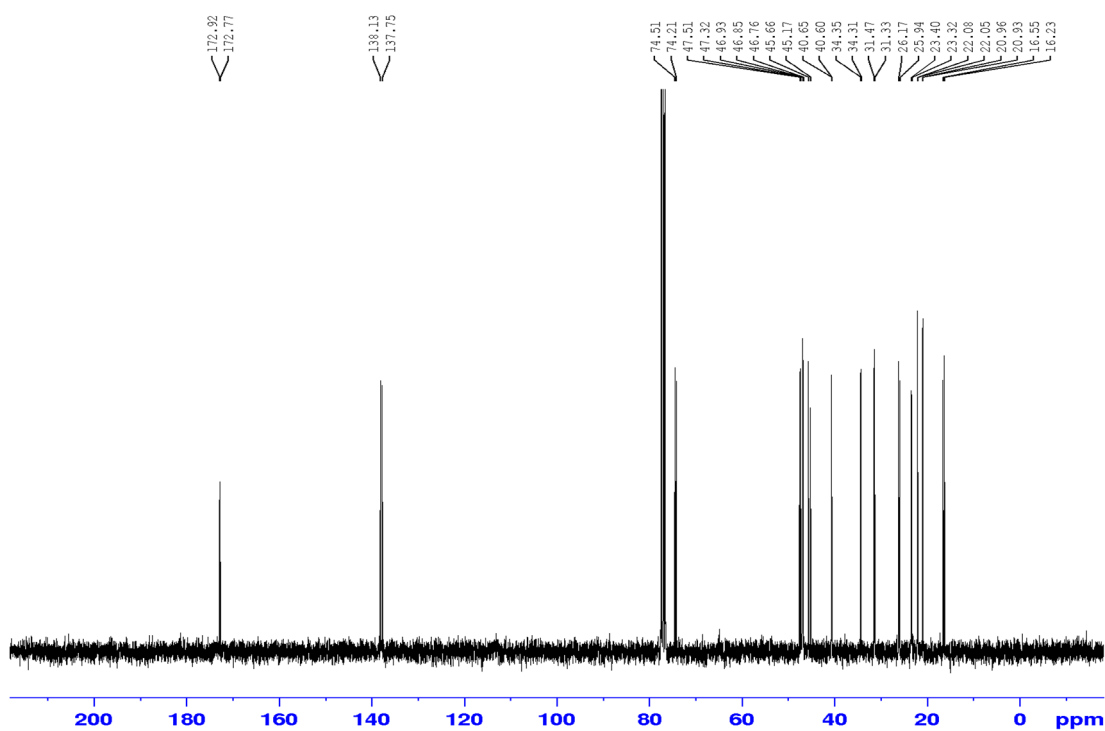

**Figure S2.**  $^{13}\text{C}$  NMR spectrum of **M1** ( $\text{CDCl}_3$ ).

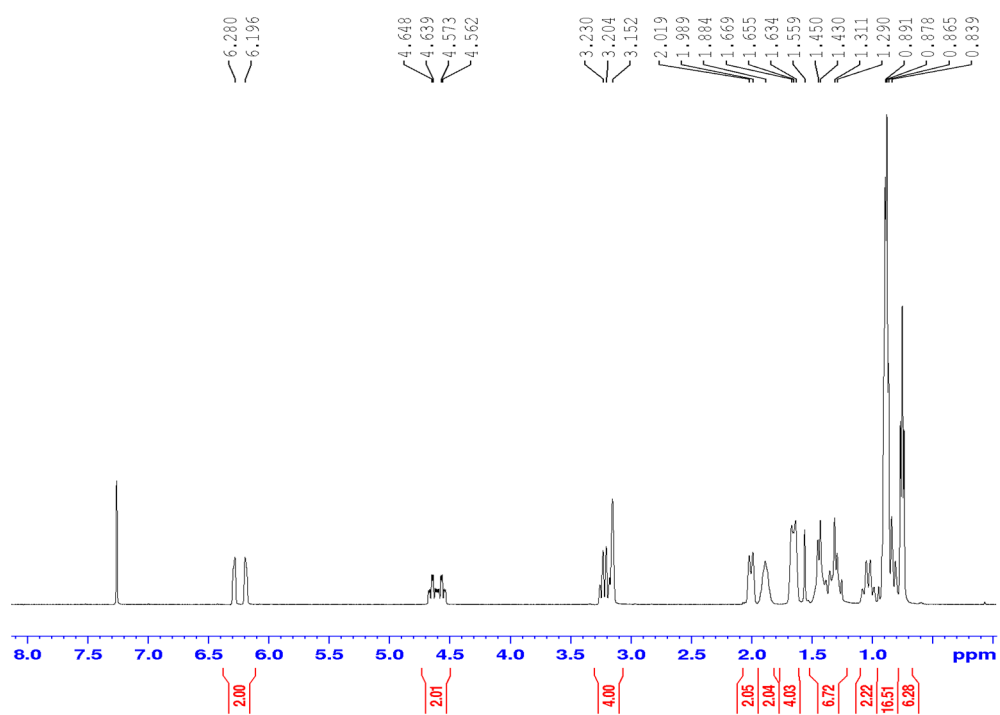

**Figure S3.**  $^1\text{H}$  NMR spectrum of **M2** ( $\text{CDCl}_3$ ).

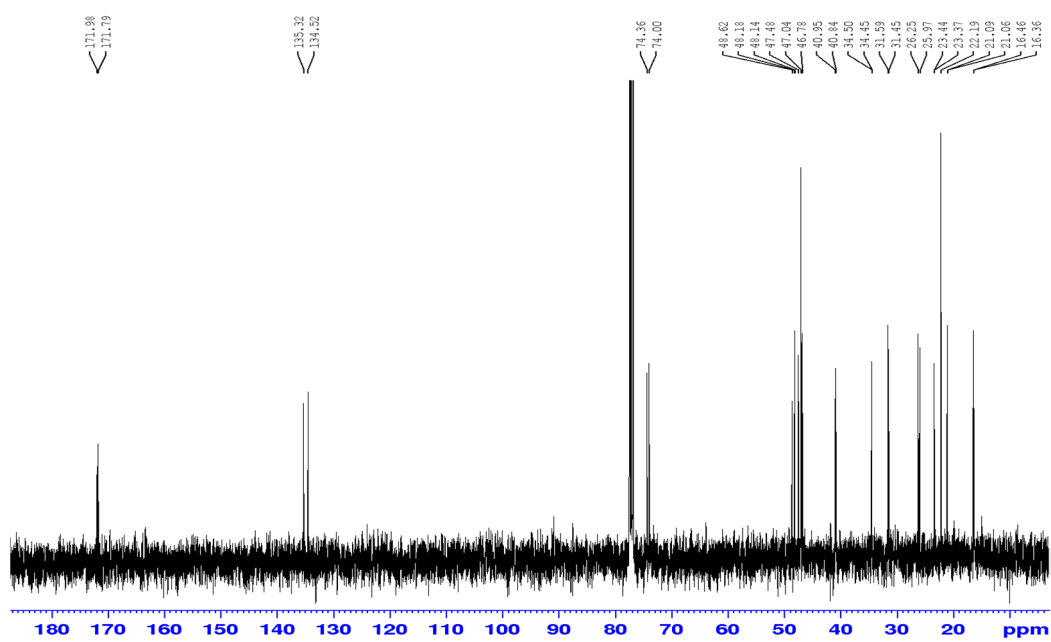

**Figure S4.**  $^{13}\text{C}$  NMR spectrum of **M2** ( $\text{CDCl}_3$ ).

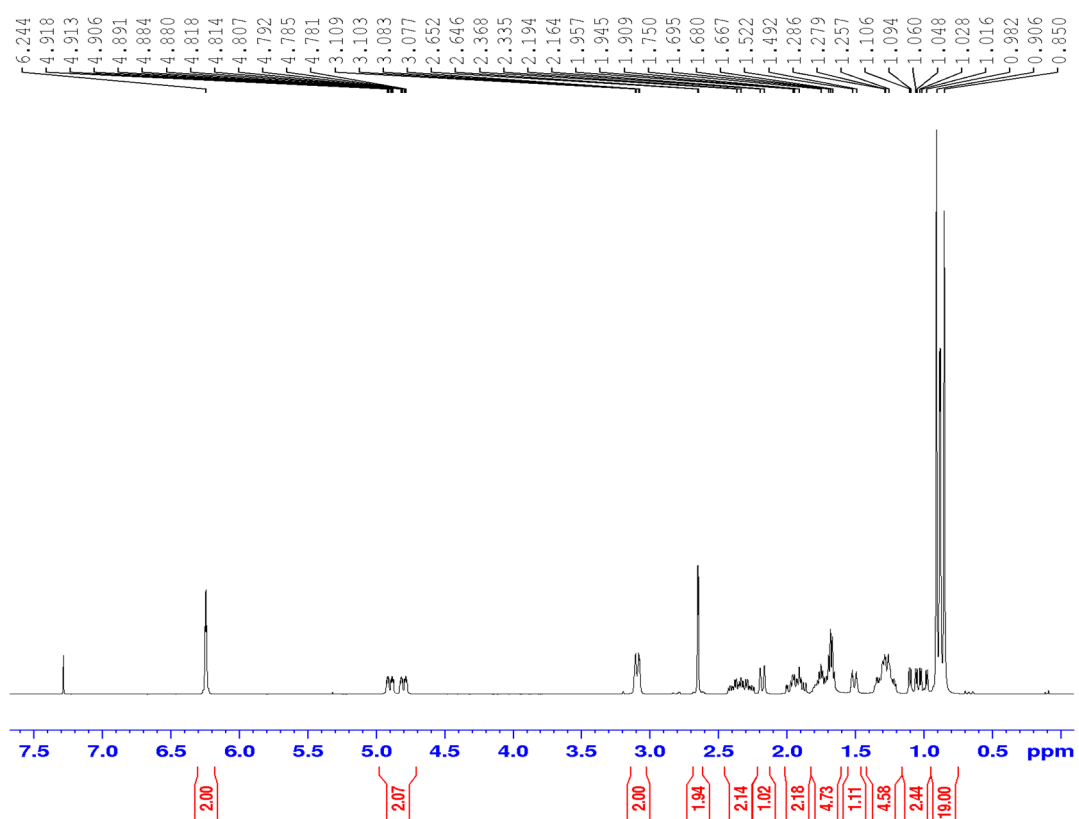

**Figure S5.** <sup>1</sup>H NMR spectrum of M3 (CDCl<sub>3</sub>).

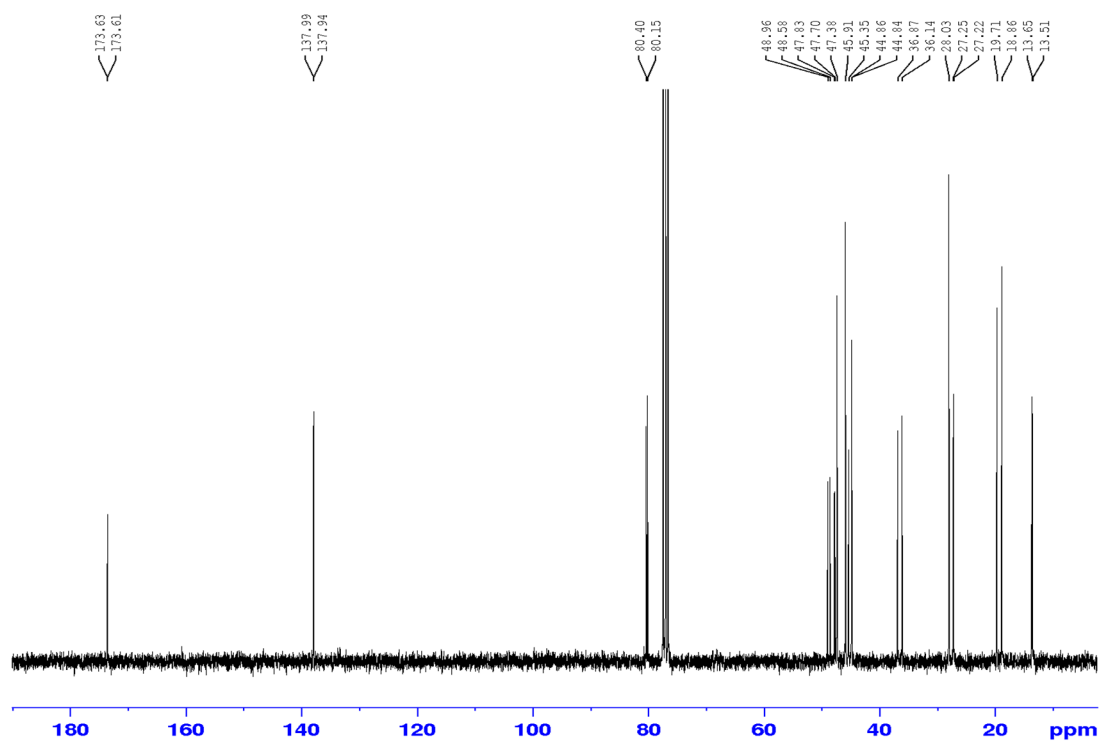

**Figure S6.** <sup>13</sup>C NMR spectrum of M3 (CDCl<sub>3</sub>).

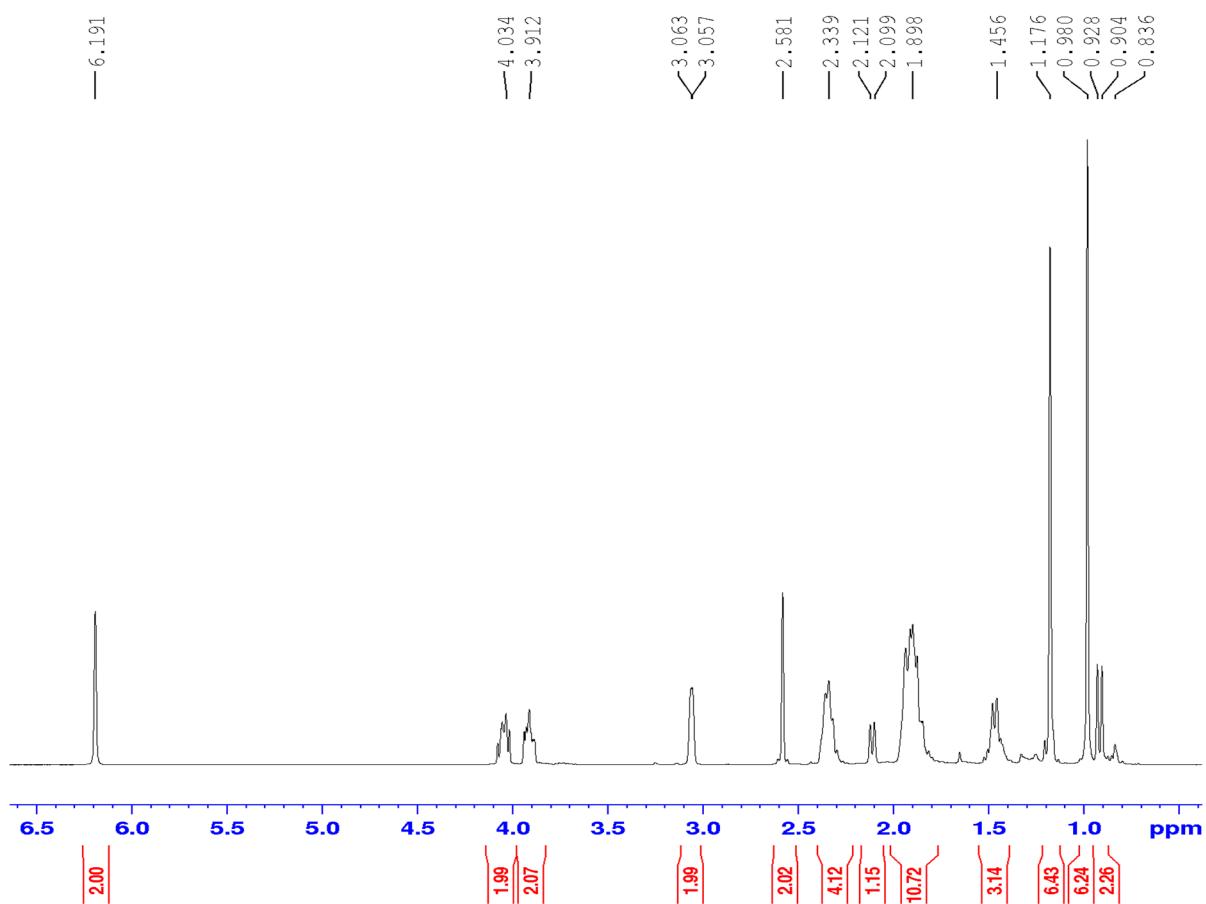

**Figure S7.**  $^1\text{H}$  NMR spectrum of **M4** ( $\text{CDCl}_3$ ).

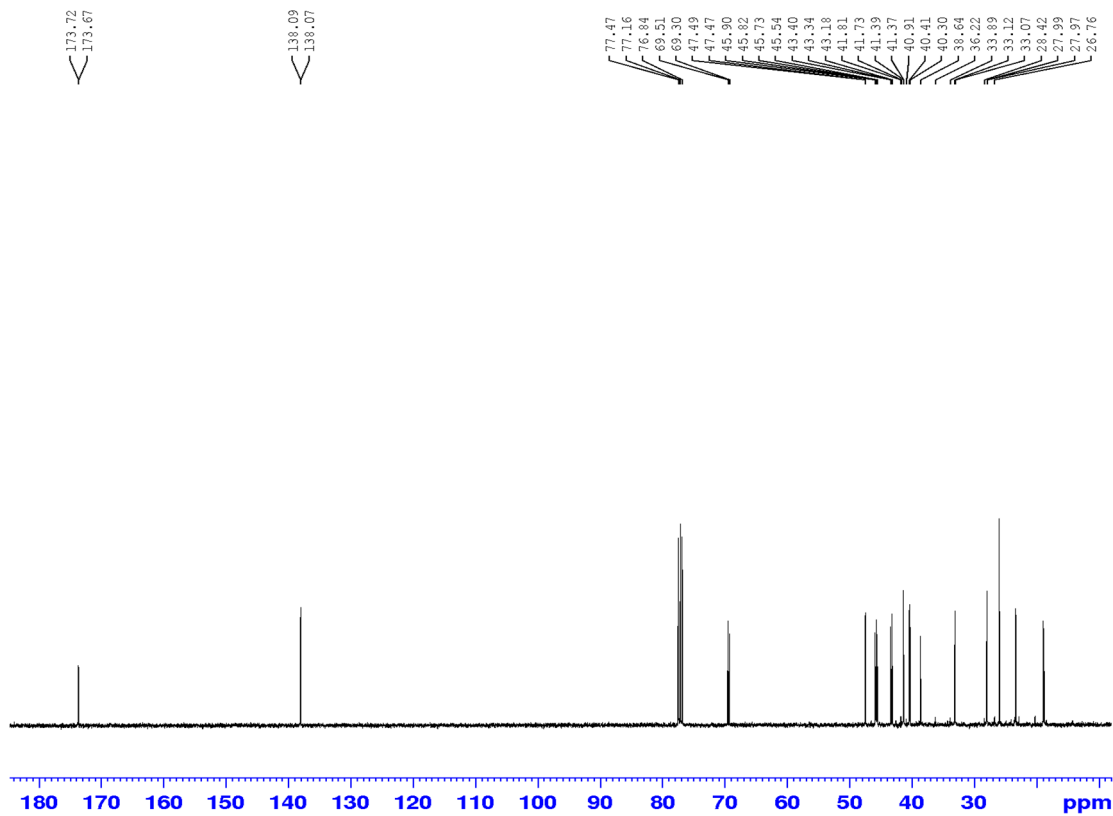

**Figure S8.**  $^{13}\text{C}$  NMR spectrum of **M4** ( $\text{CDCl}_3$ ).

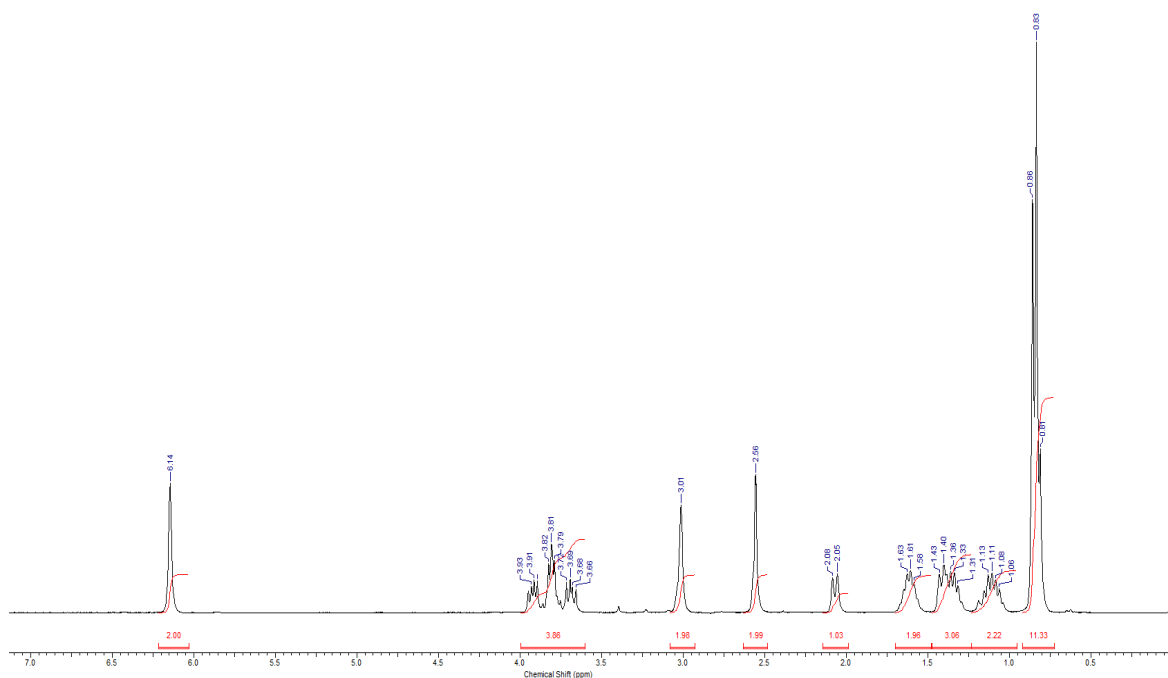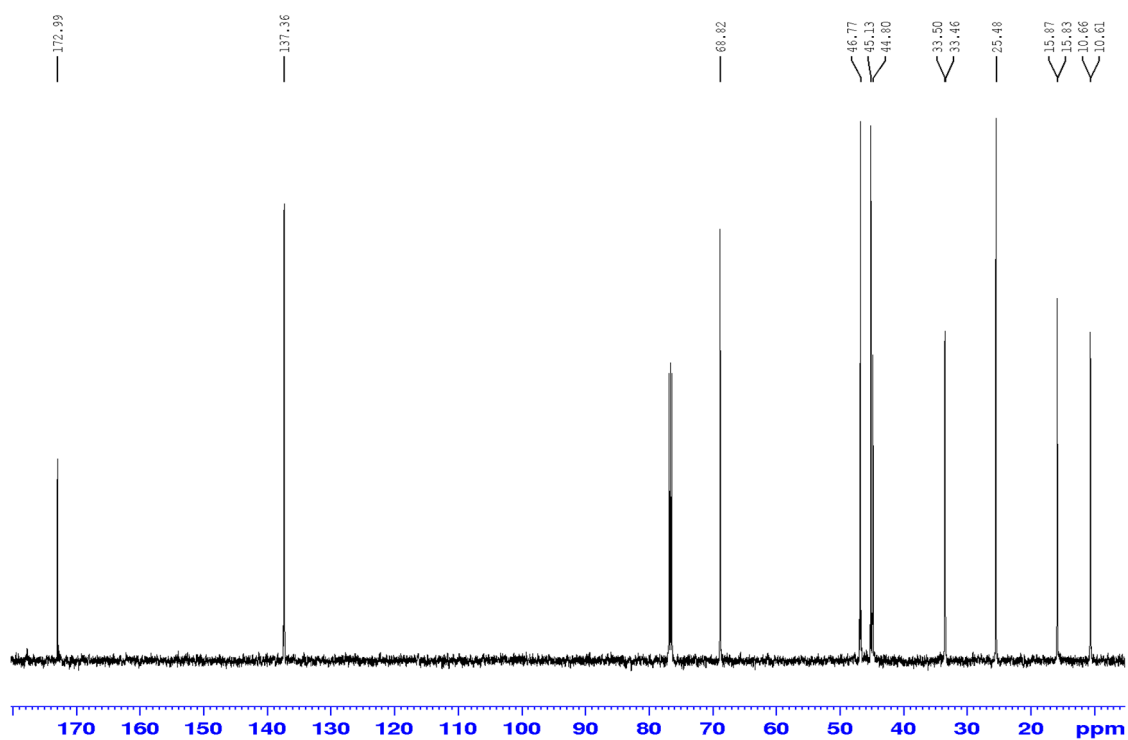

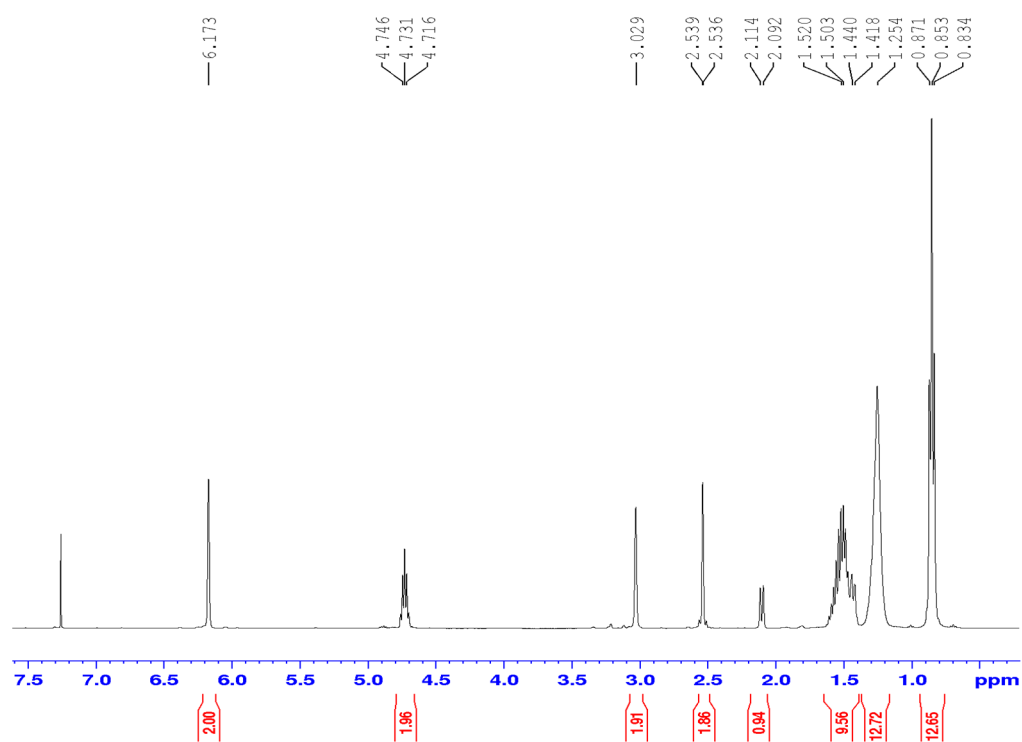

(a)

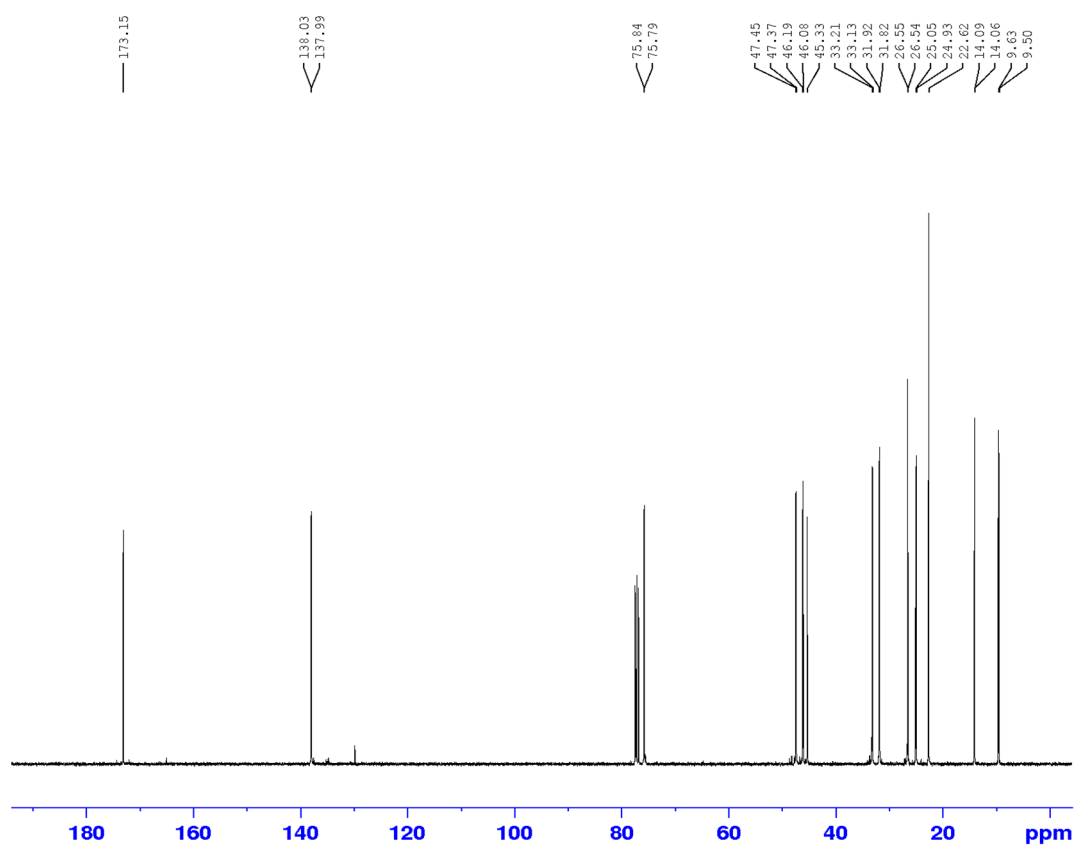

(b)

**Figure S11.**  $^1\text{H}$  (a) and  $^{13}\text{C}$  (b) NMR spectra of **M6** ( $\text{CDCl}_3$ ).

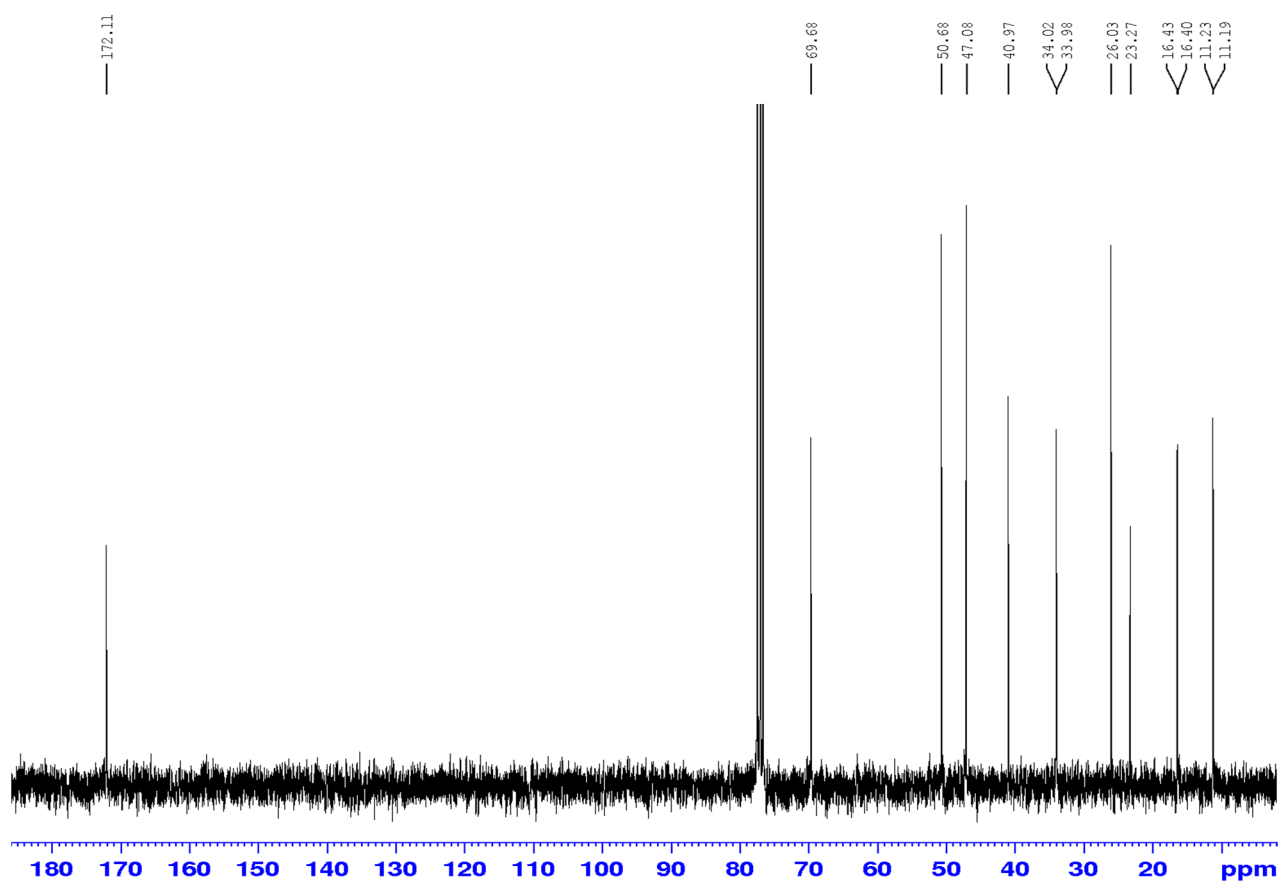

**Figure S12.** <sup>13</sup>C NMR spectrum of epoxide based on **M5** (CDCl<sub>3</sub>).

## ESI-HRMS spectra of the monomers

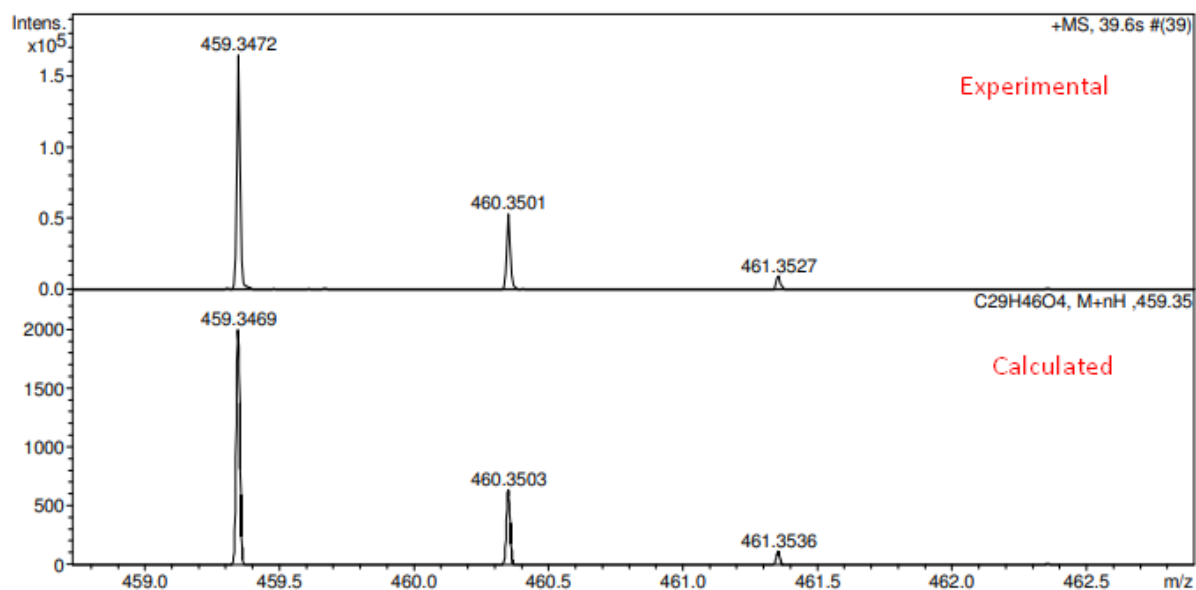

**Figure S13.** Experimental and theoretical ESI-(+)HRMS spectra of **M1** in  $\text{CH}_3\text{CN}$  solution: experimental peak  $[\text{M}+\text{H}]^+ = 459.3472$  Da, calculated for  $\text{C}_{29}\text{H}_{47}\text{O}_4 = 459.3469$ .

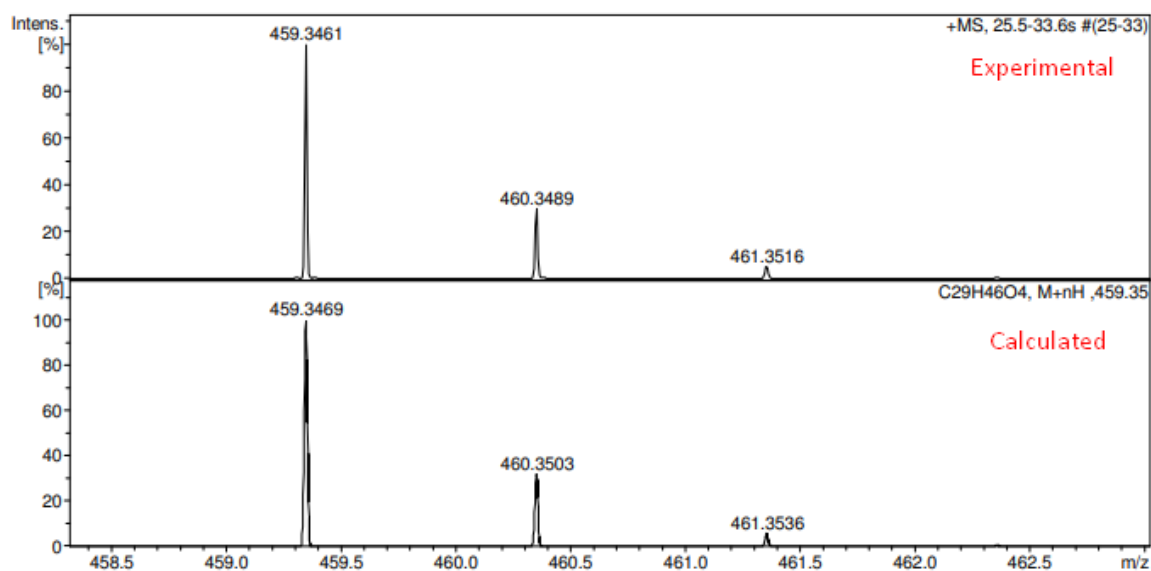

**Figure S14.** Experimental and theoretical ESI-(+)HRMS spectra of **M2** in  $\text{CH}_3\text{CN}$  solution: experimental peak  $[\text{M}+\text{H}]^+ = 459.3461$  Da, calculated for  $\text{C}_{29}\text{H}_{47}\text{O}_4 = 459.3469$ .

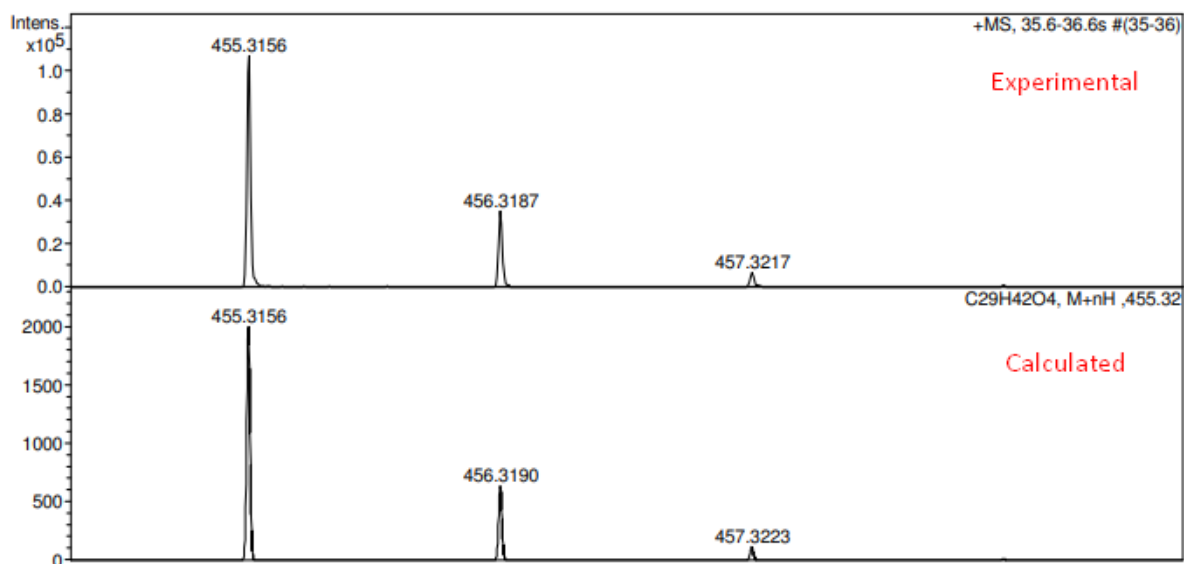

**Figure S15.** Experimental and theoretical ESI-(+)HRMS spectra of **M3** in  $CH_3CN$  solution: experimental peak  $[M+H]^+ = 455.3156$  Da, calculated for  $C_{29}H_{43}O_4 = 455.3156$

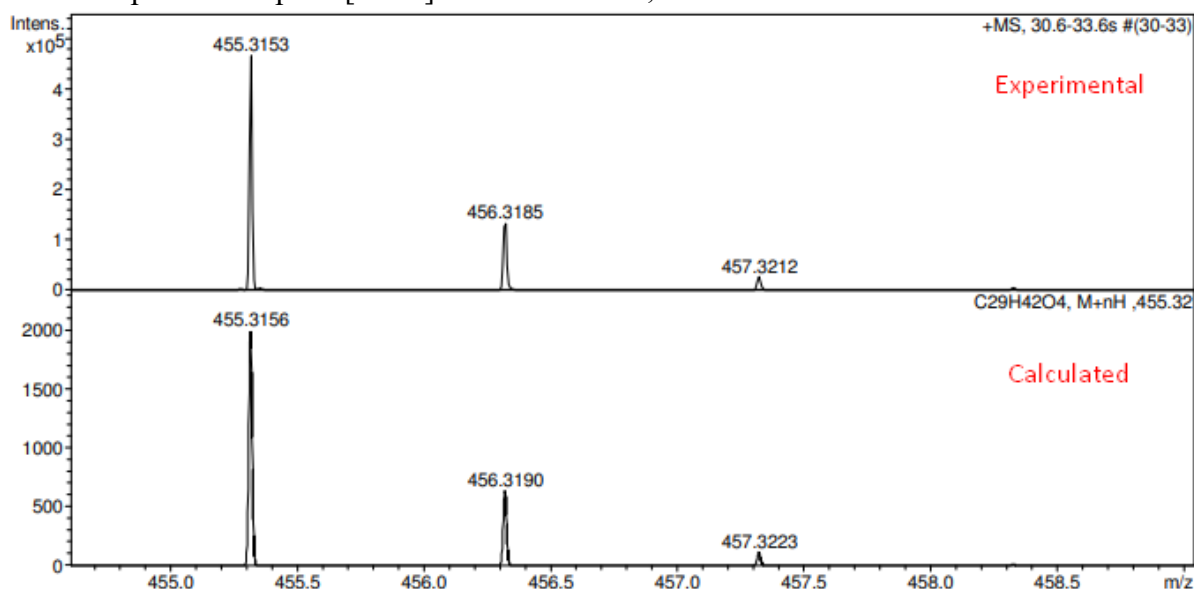

**Figure S16.** Experimental and theoretical ESI-(+)HRMS spectra of **M4** in  $CH_3CN$  solution: experimental peak  $[M+H]^+ = 455.3153$  Da, calculated for  $C_{29}H_{43}O_4 = 455.3156$ .

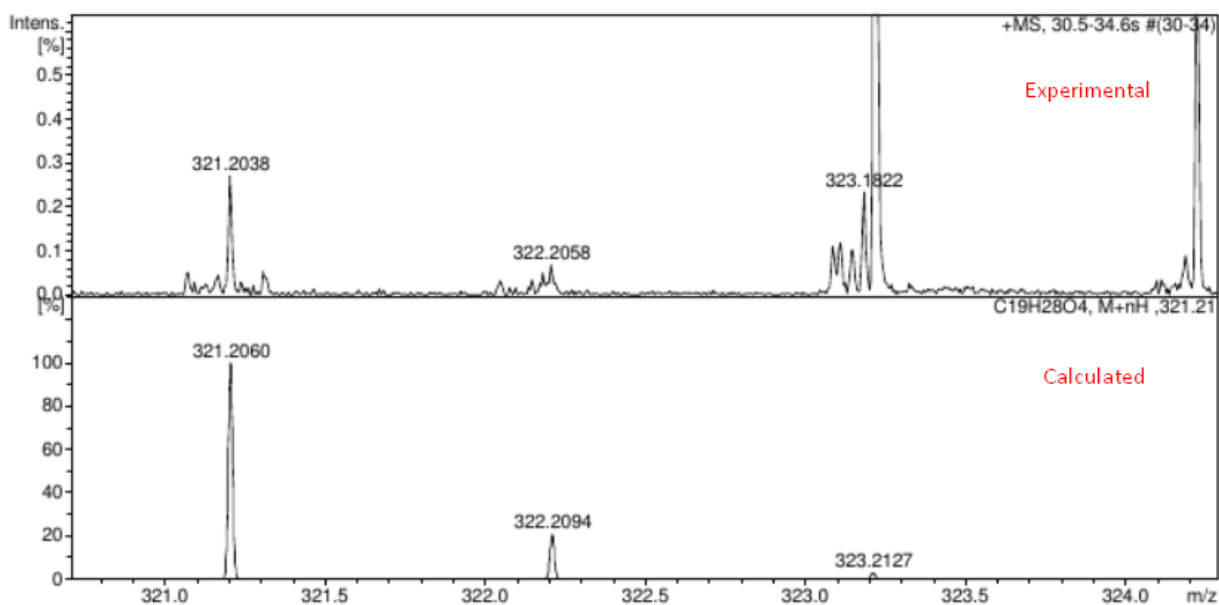

**Figure S17.** Experimental and theoretical ESI-(+)HRMS spectra of **M5** in  $\text{CH}_3\text{CN}$  solution: experimental peak  $[\text{M}+\text{H}]^+ = 321.2038$  Da, calculated for  $\text{C}_{29}\text{H}_{29}\text{O}_4 = 321.2060$  (MS is dirty due to some part of the monomer was converted to the epoxide).

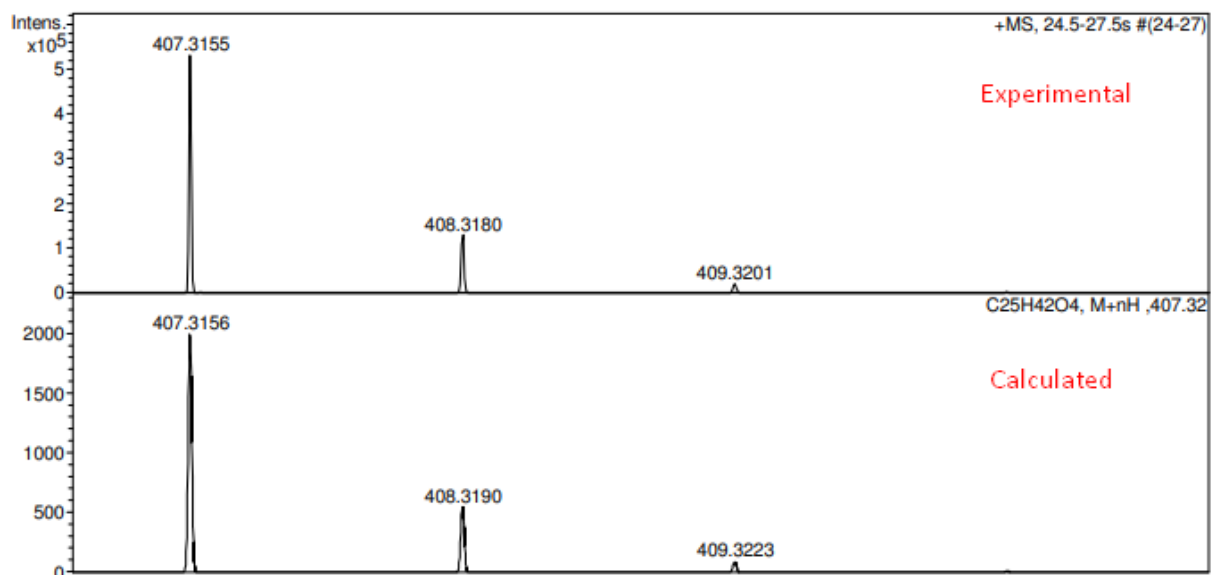

**Figure S18.** Experimental and theoretical ESI-(+)HRMS spectra of **M6** in  $\text{CH}_3\text{CN}$  solution: experimental peak  $[\text{M}+\text{H}]^+ = 407.3155$  Da, calculated for  $\text{C}_{25}\text{H}_{43}\text{O}_4 = 407.3156$ .

## X-ray diffraction data for M1 and M2

**Table S1.** Crystal data and structure refinement details for **M1** and **M2**.

| Parameter                                                                                             | <b>M1</b>                                       | <b>M2</b>                                      |
|-------------------------------------------------------------------------------------------------------|-------------------------------------------------|------------------------------------------------|
| Formula                                                                                               | C <sub>29</sub> H <sub>46</sub> O <sub>4</sub>  | C <sub>29</sub> H <sub>46</sub> O <sub>4</sub> |
| <i>M</i>                                                                                              | 458.66                                          | 458.66                                         |
| <i>T</i> , K                                                                                          | 100                                             | 120                                            |
| Crystal system                                                                                        | Orthorhombic                                    | Monoclinic                                     |
| Space group                                                                                           | <i>P2<sub>1</sub>2<sub>1</sub>2<sub>1</sub></i> | <i>C2</i>                                      |
| <i>Z</i> ( <i>Z'</i> )                                                                                | 4 (1)                                           | 4 (1)                                          |
| <i>a</i> , Å                                                                                          | 6.0929(10)                                      | 23.4647(18)                                    |
| <i>b</i> , Å                                                                                          | 36.257(3)                                       | 5.7765(4)                                      |
| <i>c</i> , Å                                                                                          | 12.0966(14)                                     | 21.9950(17)                                    |
| $\alpha$ , deg                                                                                        | 90                                              | 90                                             |
| $\beta$ , deg                                                                                         | 90                                              | 115.155(4)                                     |
| $\gamma$ , deg                                                                                        | 90                                              | 90                                             |
| <i>V</i> , Å <sup>3</sup>                                                                             | 2672.3(6)                                       | 2698.5(4)                                      |
| <i>d</i> <sub>calcd</sub> , g·cm <sup>-3</sup>                                                        | 1.140                                           | 1.129                                          |
| $\mu$ , mm <sup>-1</sup>                                                                              | 0.74                                            | 5.71                                           |
| <i>F</i> <sub>000</sub>                                                                               | 1008                                            | 1008                                           |
| $\theta_{\text{max}}$ , deg                                                                           | 50                                              | 130                                            |
| Number of measured refl.                                                                              | 22808                                           | 12573                                          |
| Number of independent refl.                                                                           | 4665                                            | 4051                                           |
| Observed refl. [ <i>I</i> > 2σ( <i>I</i> )]                                                           | 3526                                            | 3131                                           |
| Parameters                                                                                            | 305                                             | 306                                            |
| <i>R</i> <sub>1</sub> [ <i>F</i> <sup>2</sup> > 2σ( <i>F</i> <sup>2</sup> )]                          | 0.0926                                          | 0.0499                                         |
| <i>wR</i> <sub>2</sub> (all data)                                                                     | 0.2202                                          | 0.1461                                         |
| <i>S</i> ( <i>F</i> <sup>2</sup> )                                                                    | 1.003                                           | 1.069                                          |
| Residual electron density<br>( <i>d</i> <sub>max</sub> / <i>d</i> <sub>min</sub> ), e·Å <sup>-3</sup> | 0.371/-0.291                                    | 0.289/-0.256                                   |

# NMR spectra of the ROMP polymers

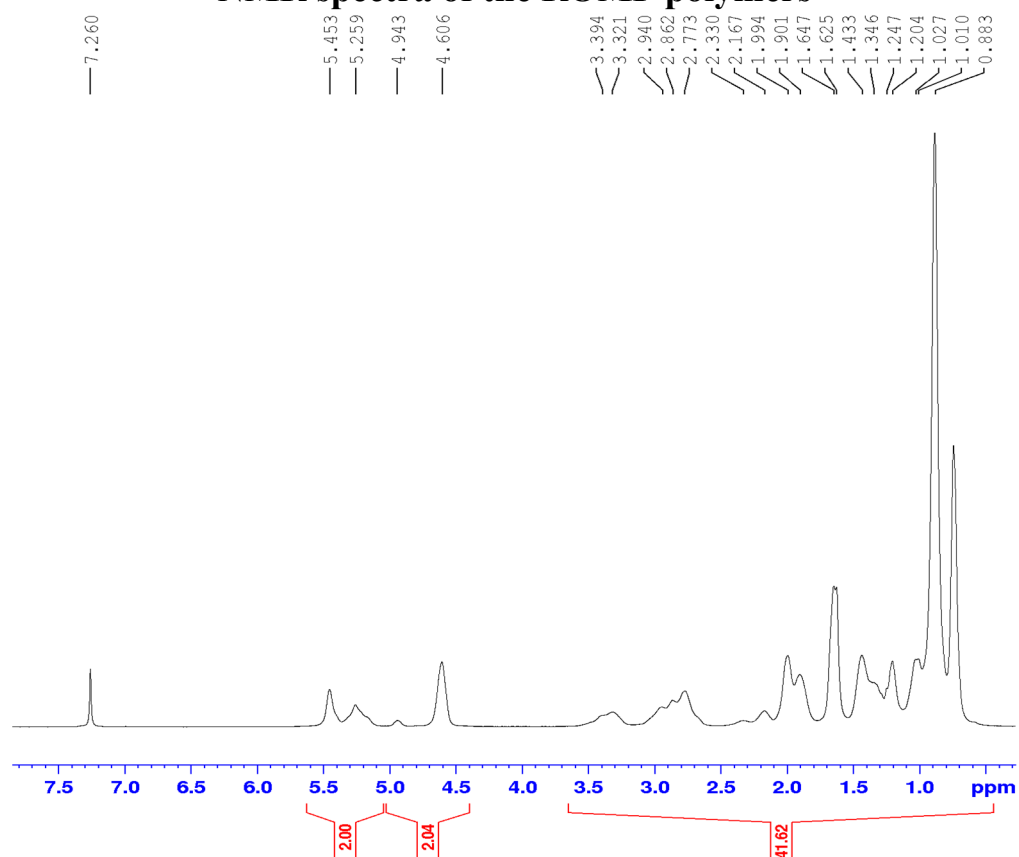

Figure S19. <sup>1</sup>H NMR spectrum of MP1 (CDCl<sub>3</sub>).

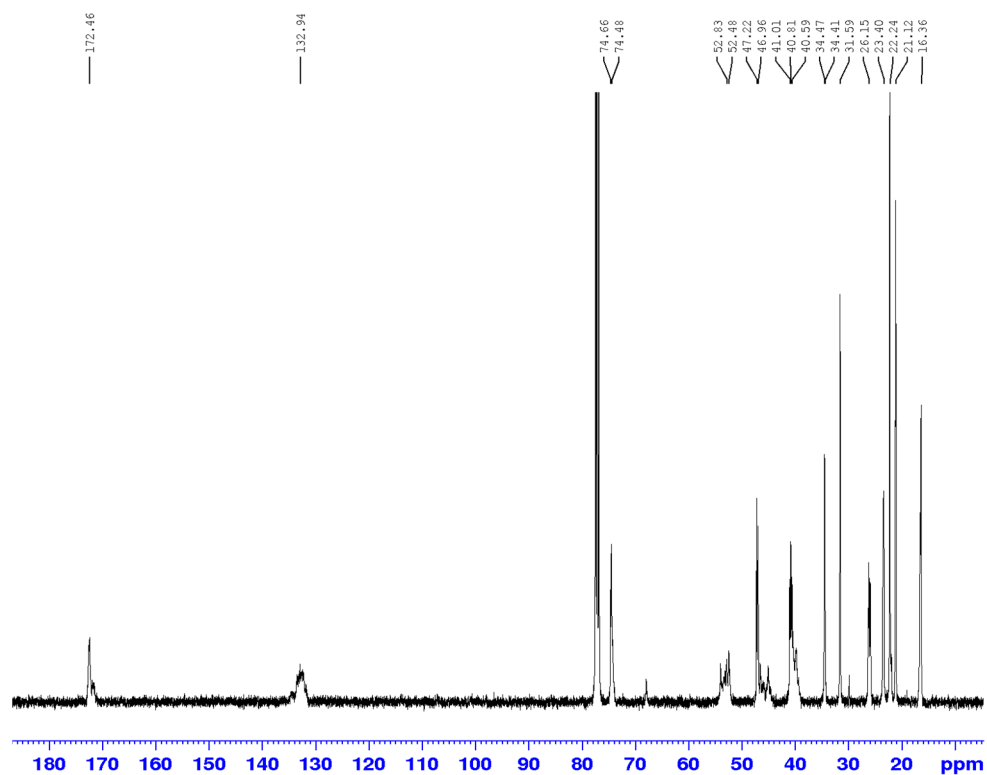

Figure S20. <sup>13</sup>C NMR spectrum of MP1 (CDCl<sub>3</sub>).

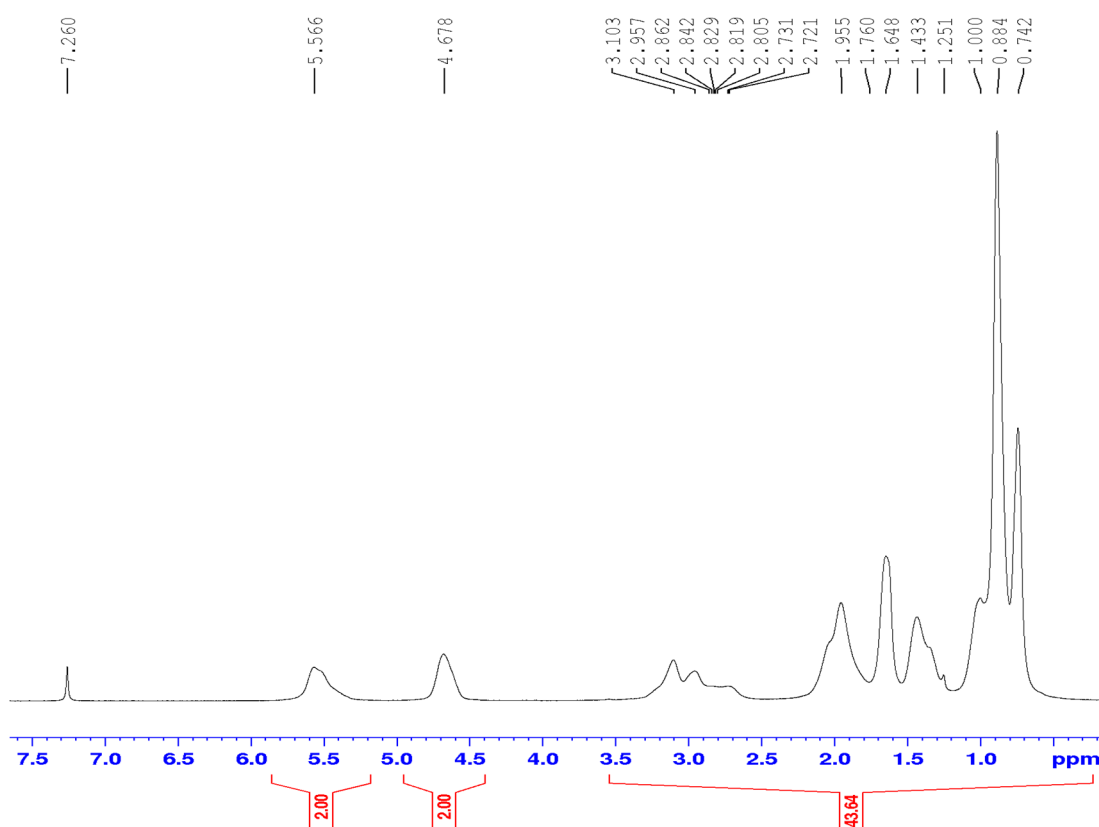

Figure S21. <sup>1</sup>H NMR spectrum of MP2 (CDCl<sub>3</sub>).

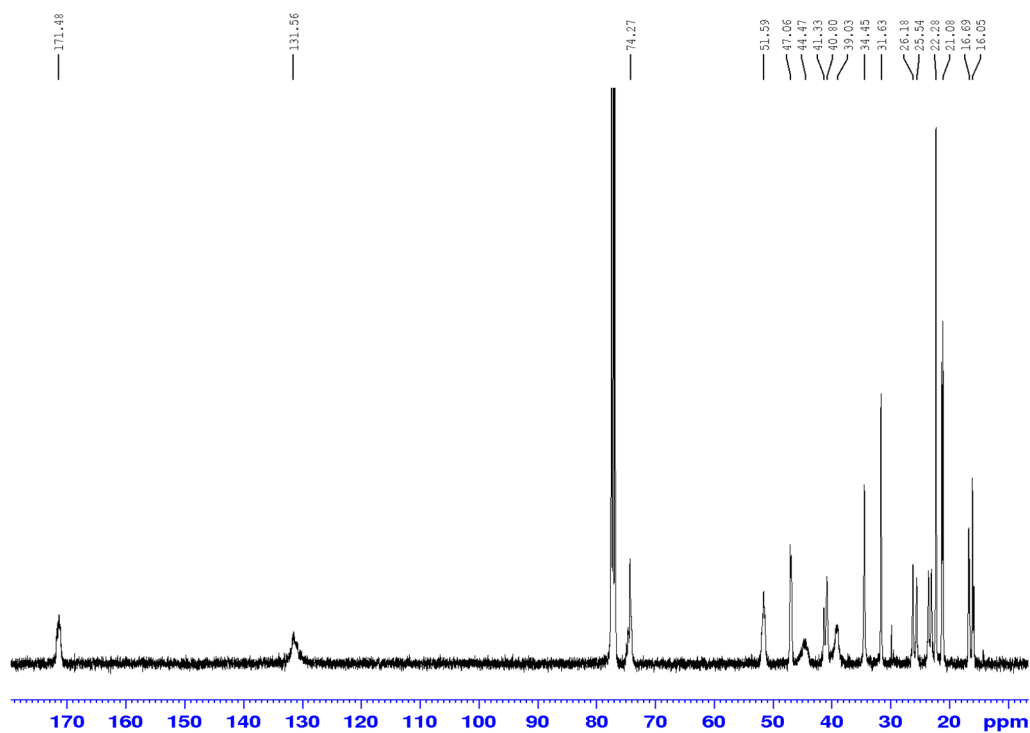

Figure S22. <sup>13</sup>C NMR spectrum of MP2 (CDCl<sub>3</sub>).

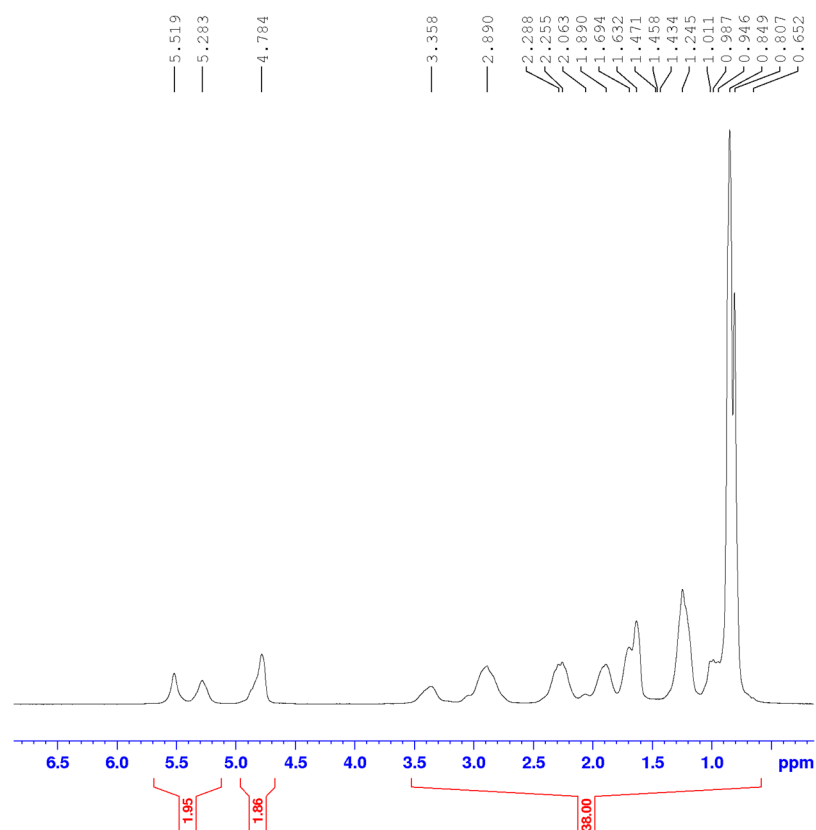

**Figure S23.** <sup>1</sup>H NMR spectrum of MP3 (CDCl<sub>3</sub>).

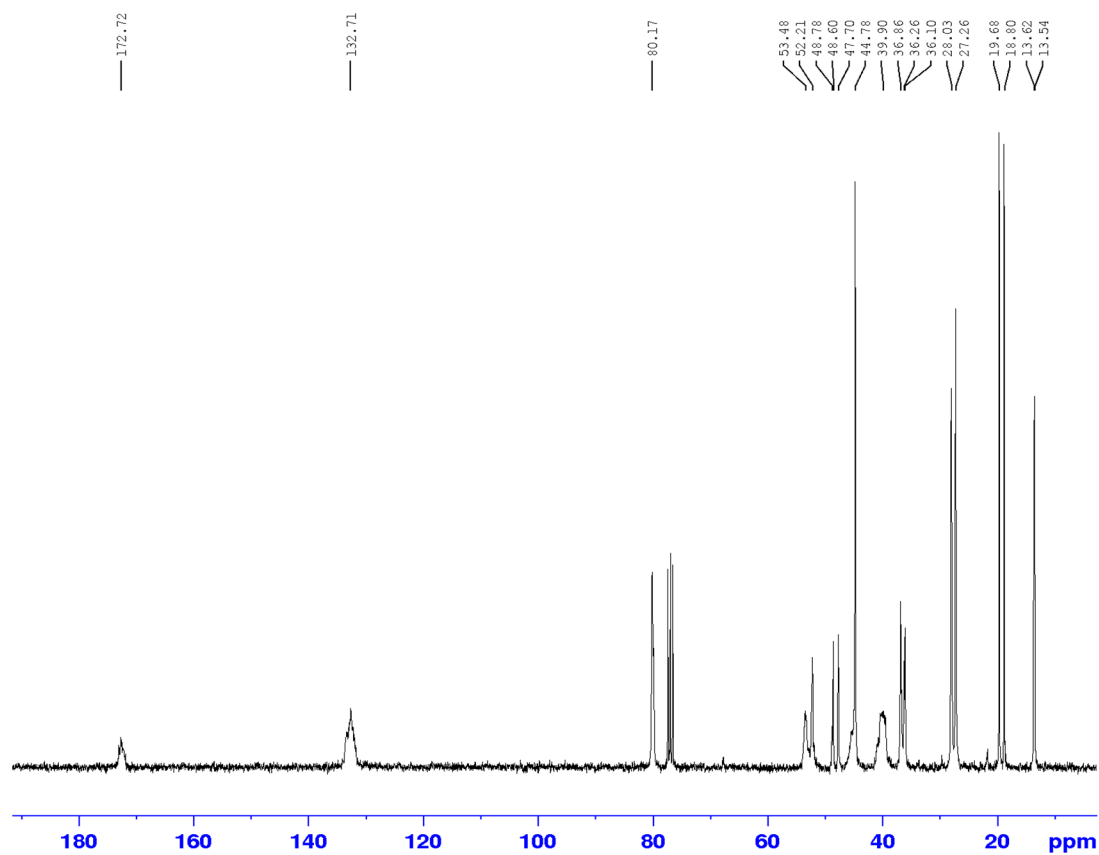

**Figure S24.** <sup>13</sup>C NMR spectrum of MP3 (CDCl<sub>3</sub>).

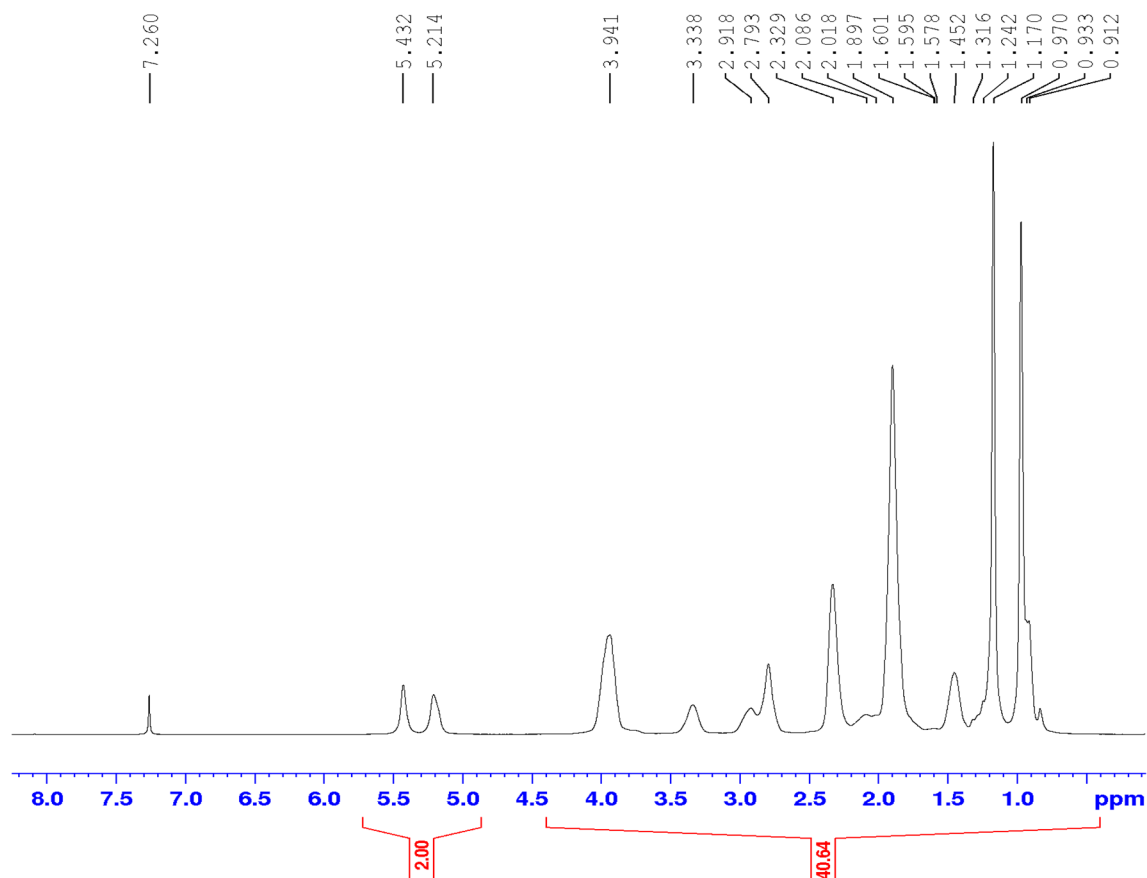

**Figure S25.**  $^1\text{H}$  NMR spectrum of **MP4** ( $\text{CDCl}_3$ ).

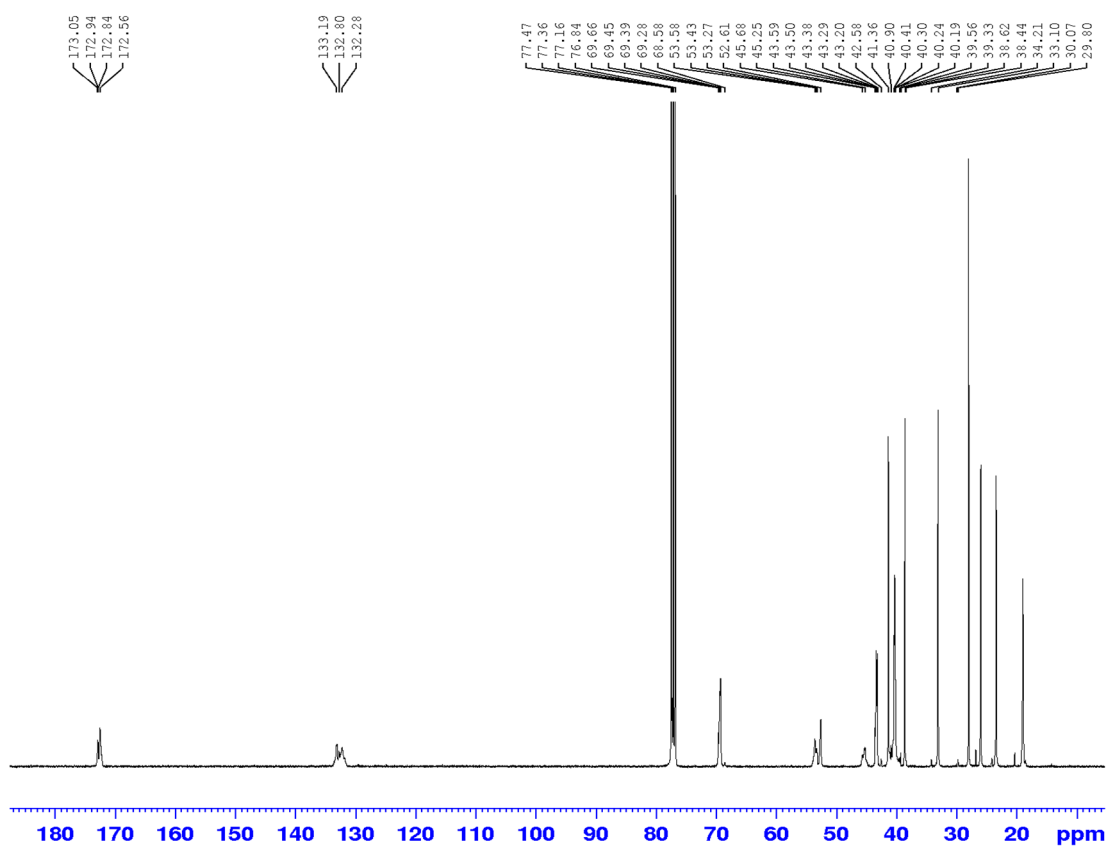

**Figure S26.**  $^{13}\text{C}$  NMR spectrum of **MP4** ( $\text{CDCl}_3$ ).

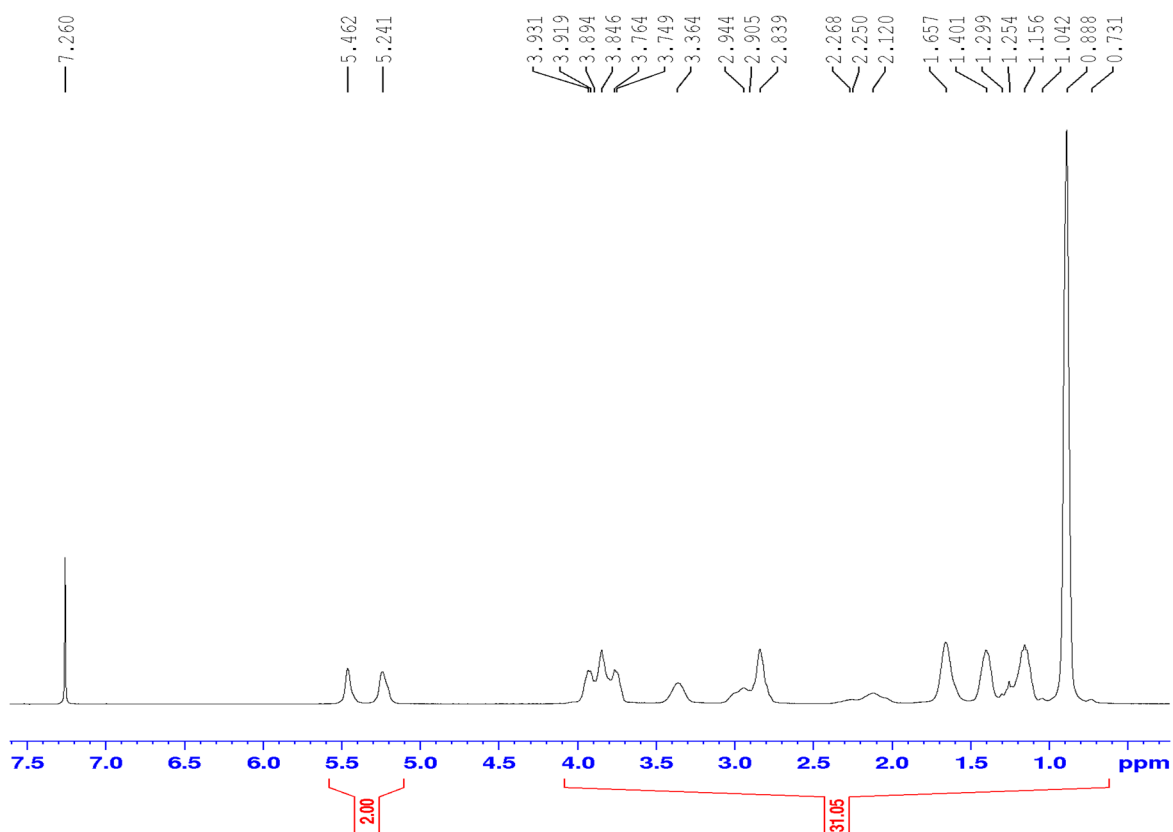

**Figure S27.**  $^1\text{H}$  NMR spectrum of **MP5** ( $\text{CDCl}_3$ ).

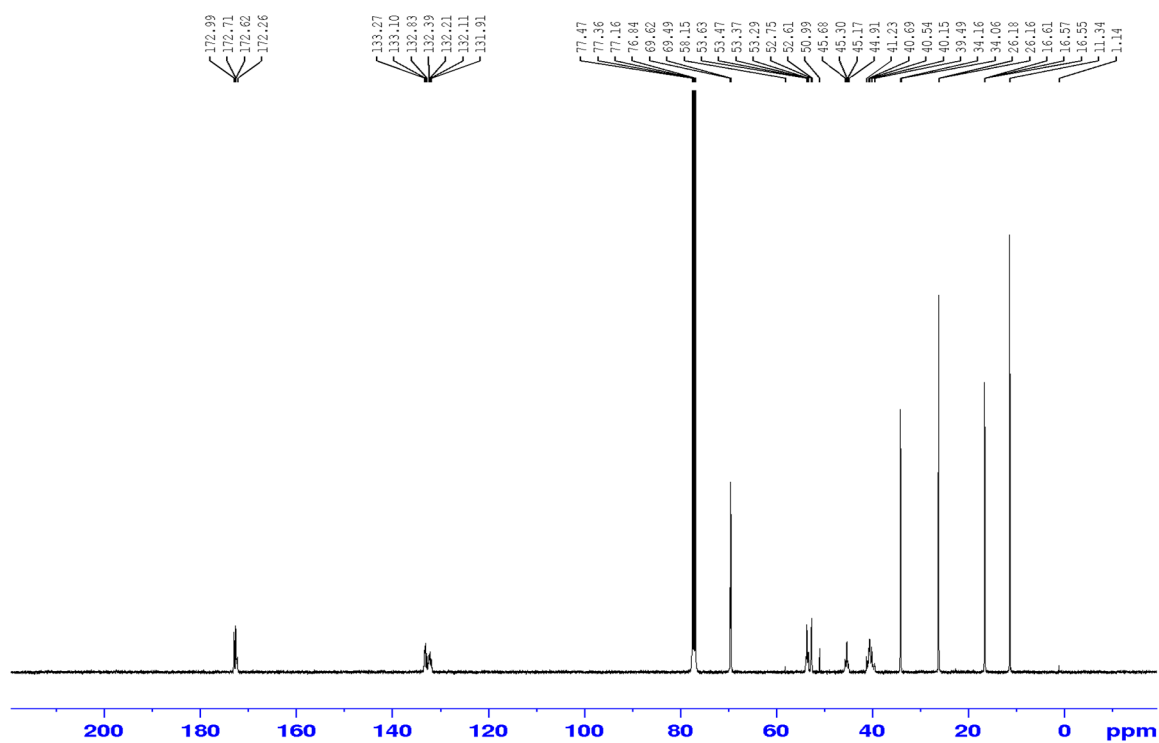

**Figure S28.**  $^{13}\text{C}$  NMR spectrum of **MP5** ( $\text{CDCl}_3$ ).

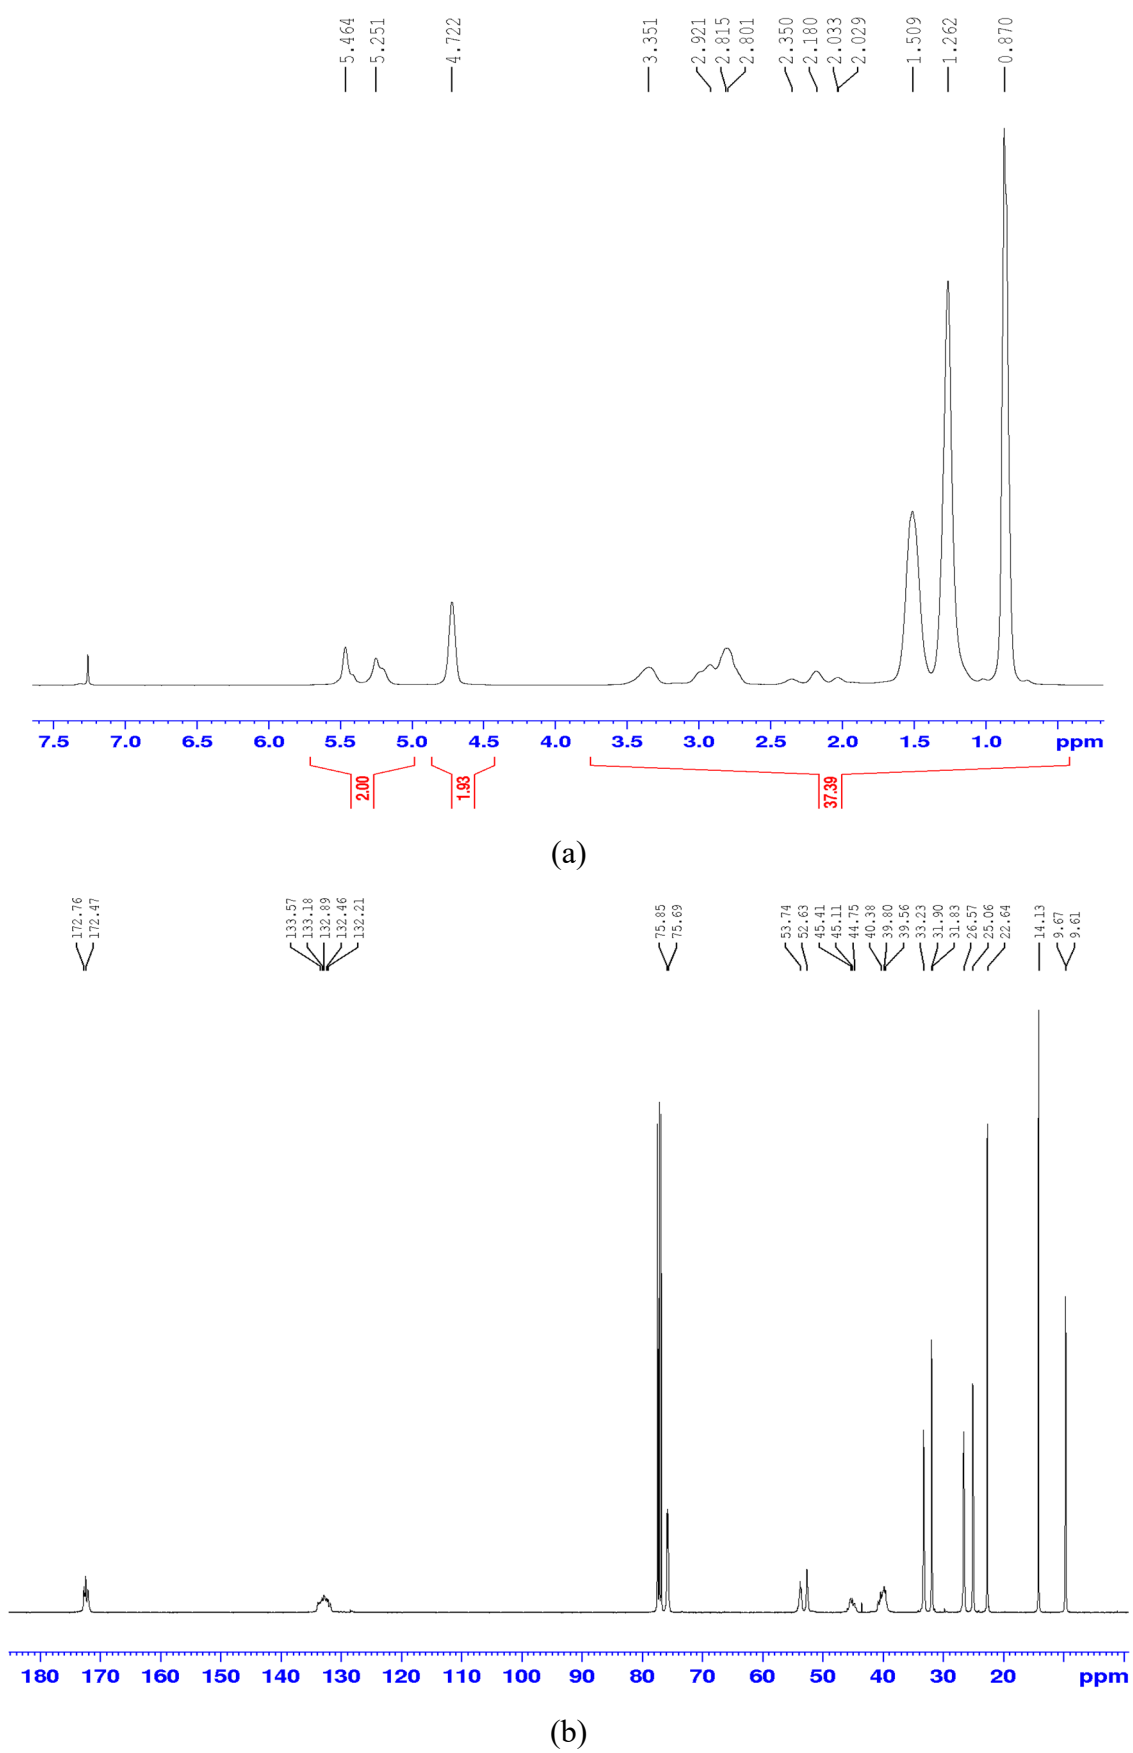

**Figure S29.** (a)  $^1\text{H}$  and (b)  $^{13}\text{C}$  NMR spectra of **MP6** (CDCl<sub>3</sub>).

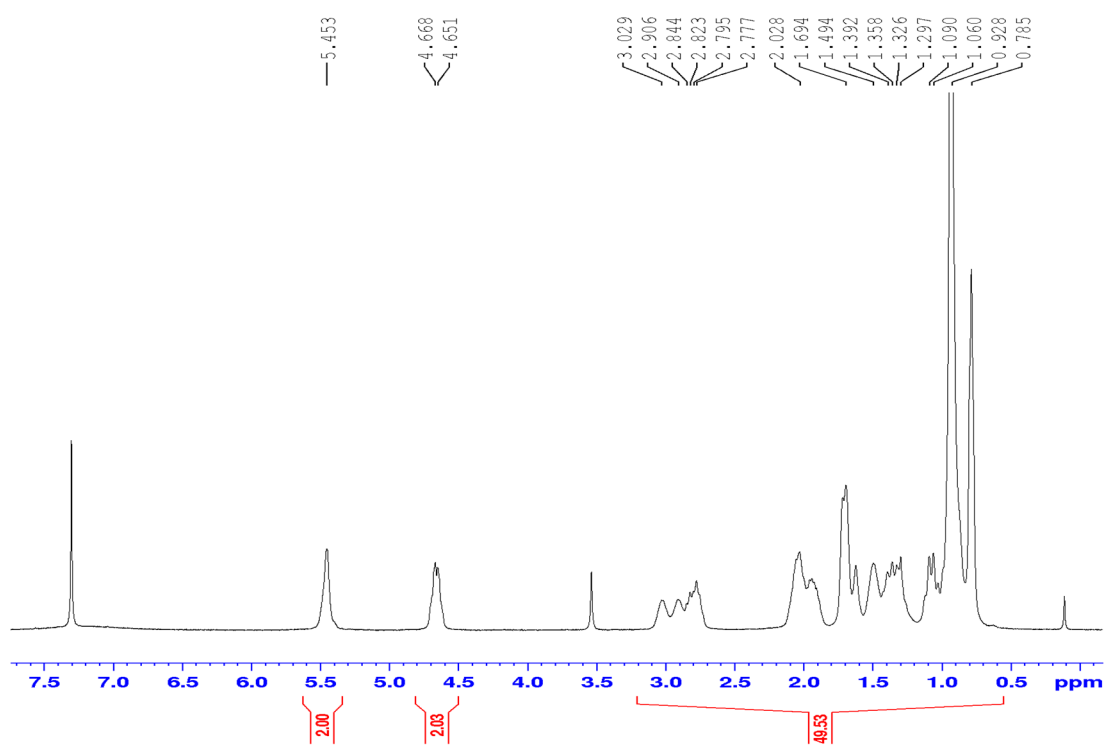

**Figure S30.**  $^1\text{H}$  NMR spectrum of **MP7** ( $\text{CDCl}_3$ ).

## CD spectra of the monomers and the ROMP polymers

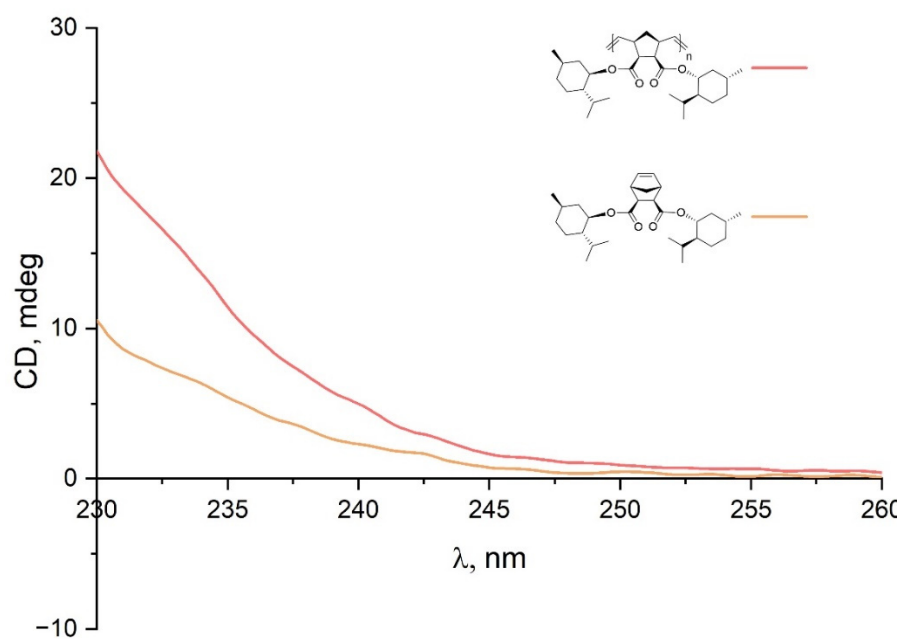

**Figure S31.** CD spectra of M1 and MP1.

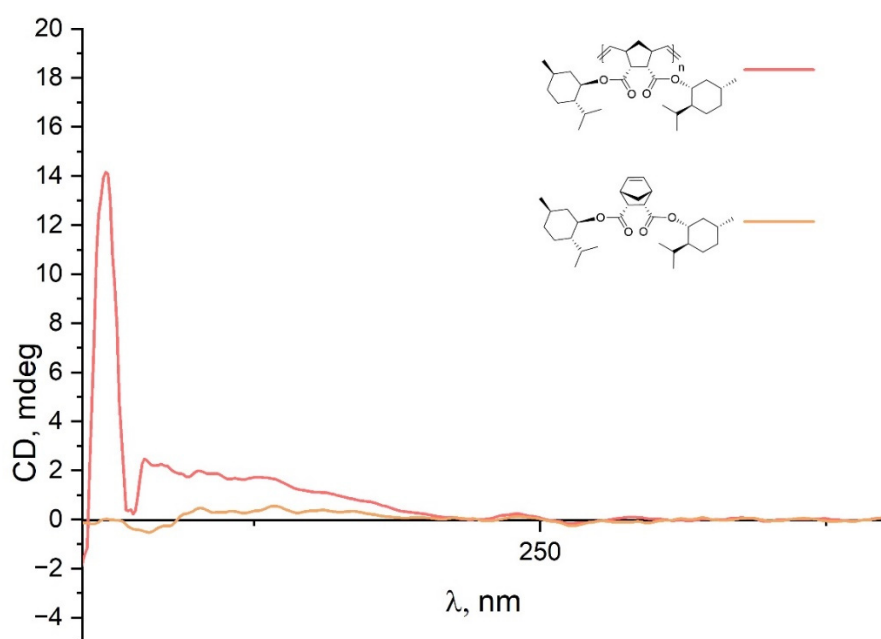

**Figure S32.** CD spectra of M2 and MP2.

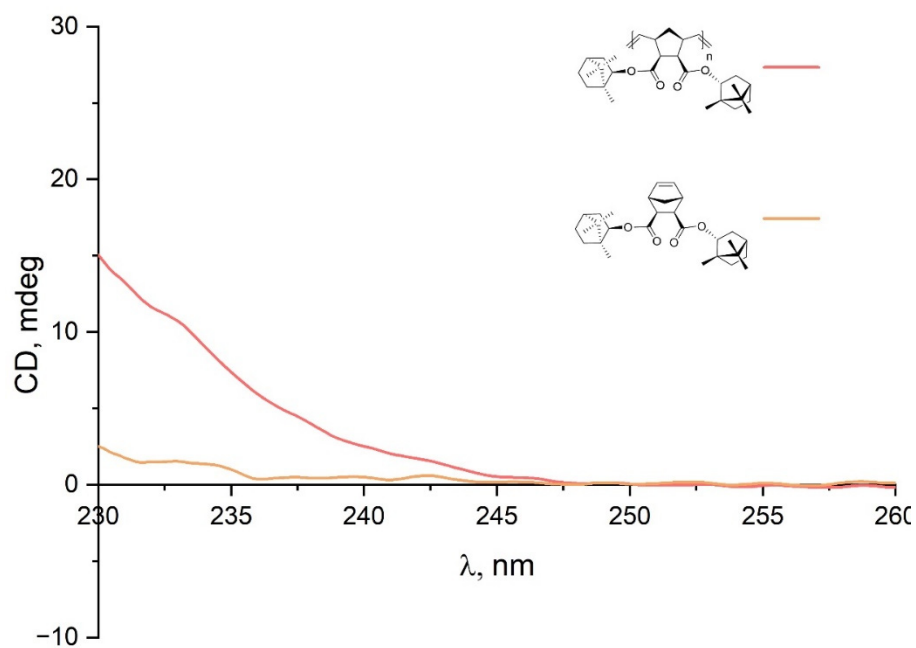

**Figure S33.** CD spectra of **M3** and **MP3**.

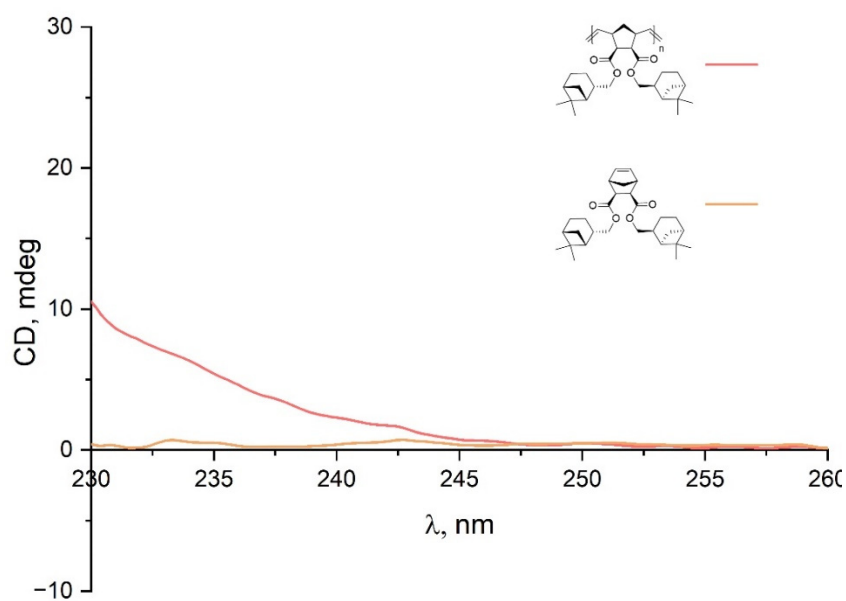

**Figure S34.** CD spectra of **M4** and **MP4**.

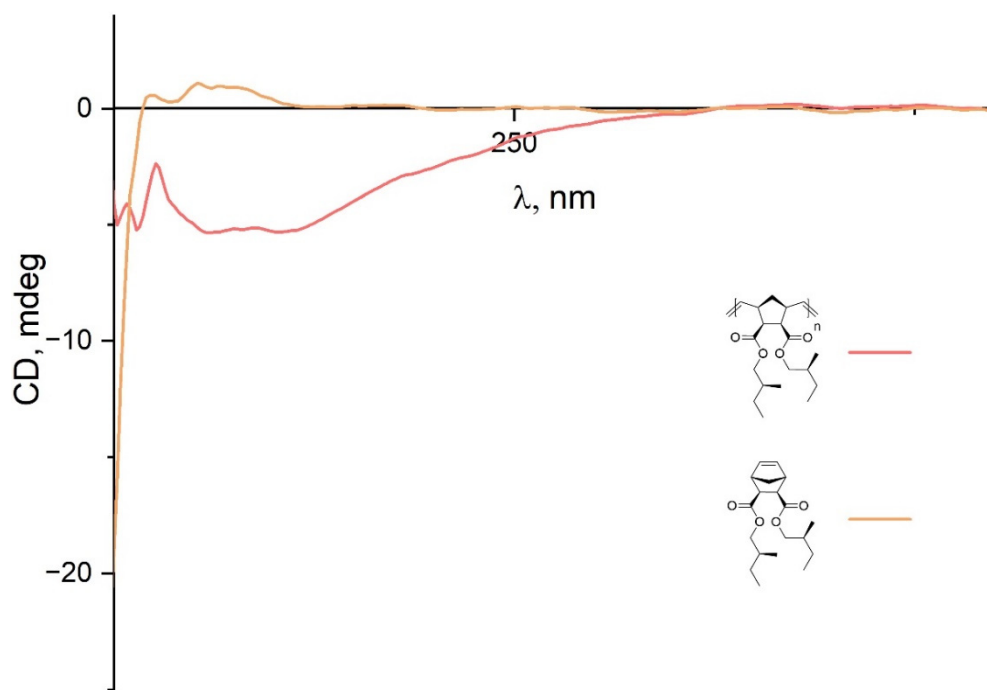

(a)

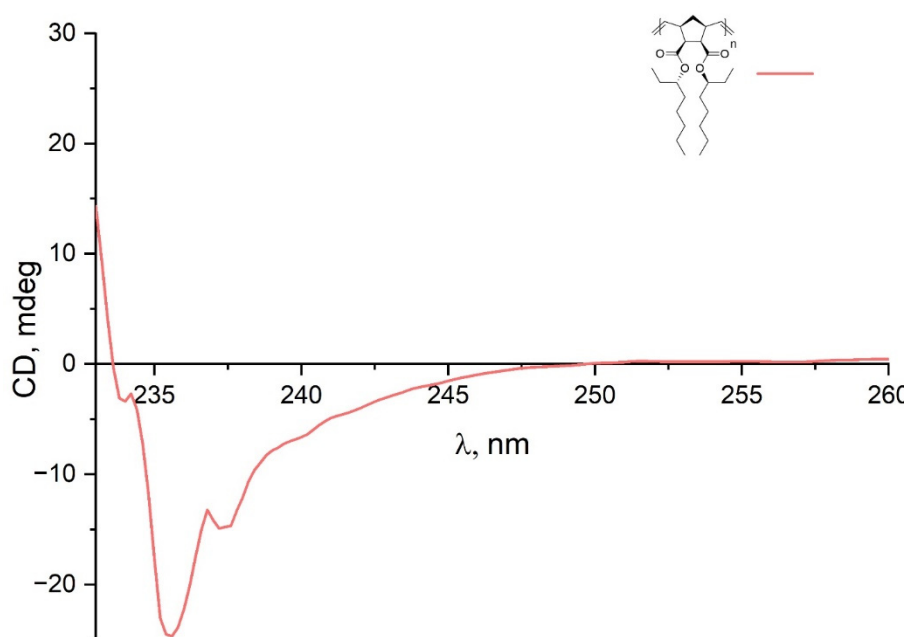

(b)

**Figure S35.** CD spectra of (a) **M5** and **MP5**, and (b) **MP6**.

### DSC curves of the polymers

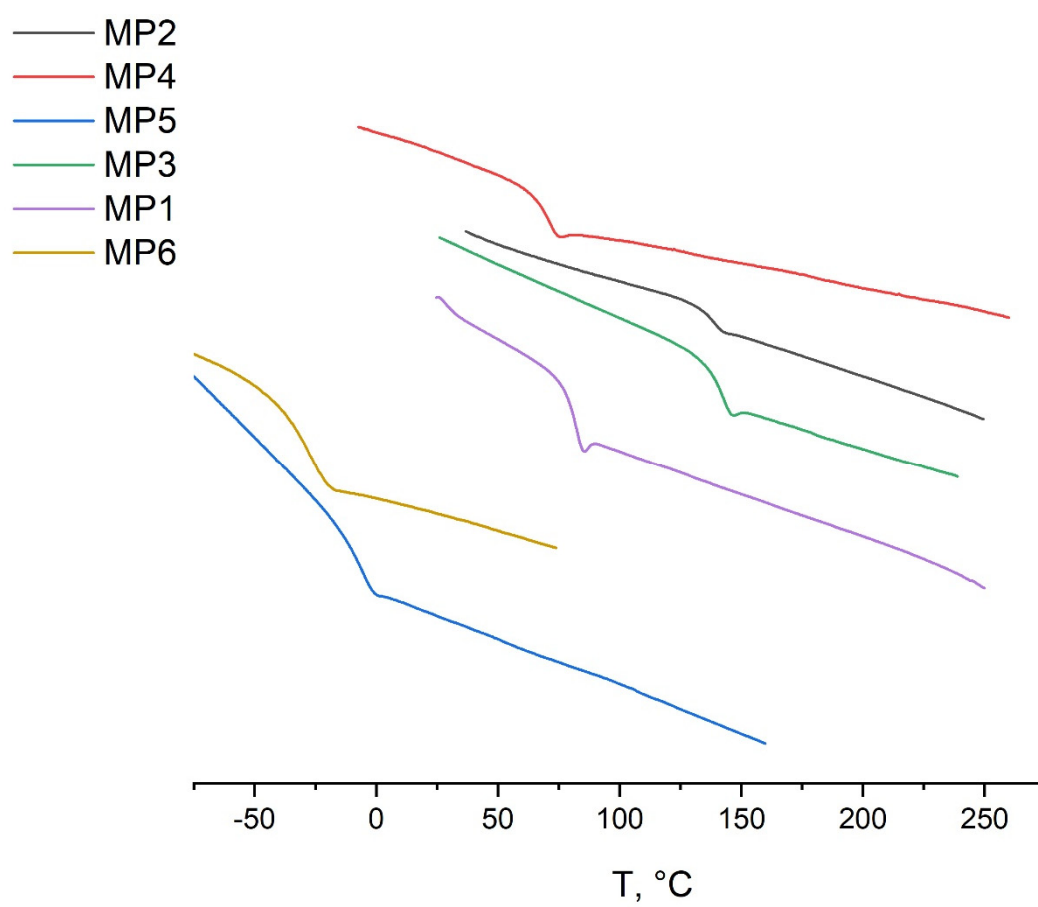

**Figure S36.** DSC curves of the prepared ROMP polymers.

### TGA curves of the ROMP polymers

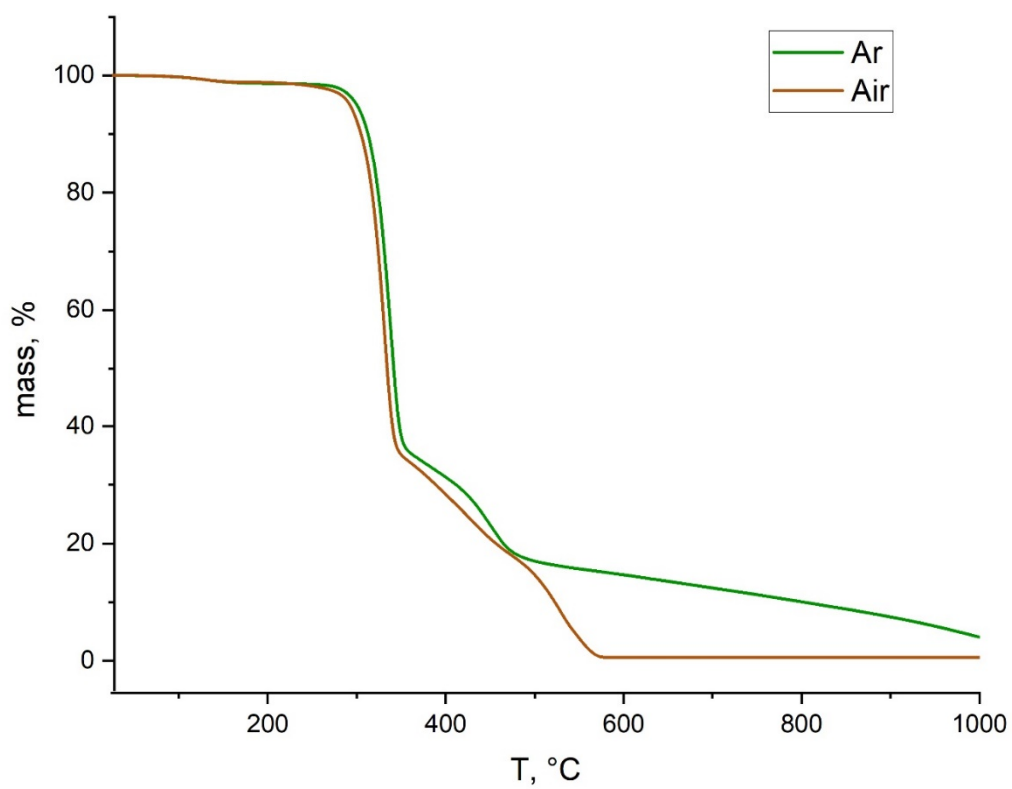

**Figure S37.** TGA curves for MP1.

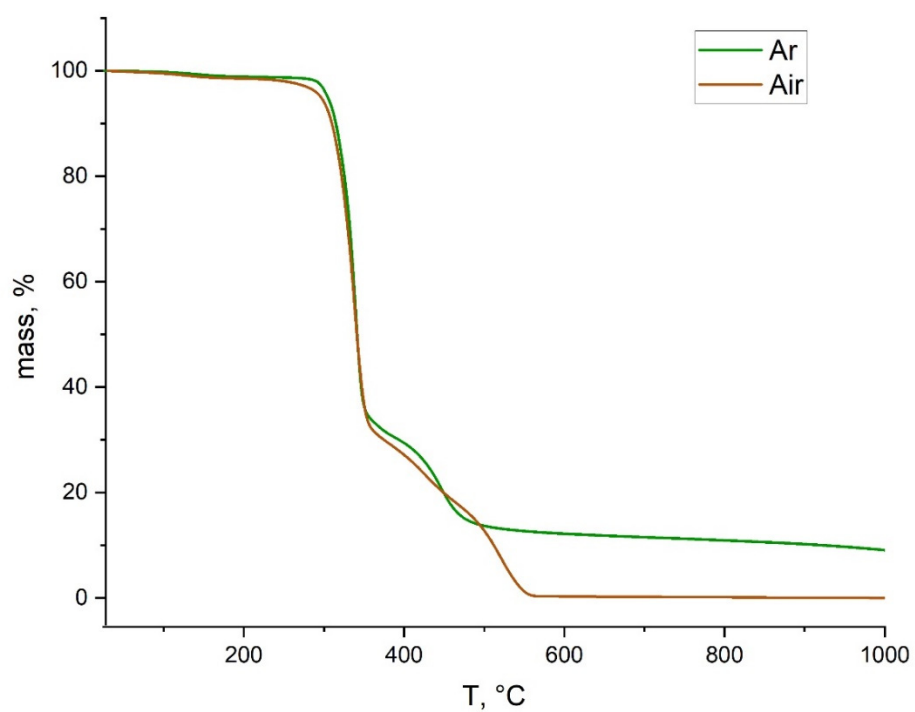

**Figure S38.** TGA curves for MP2.

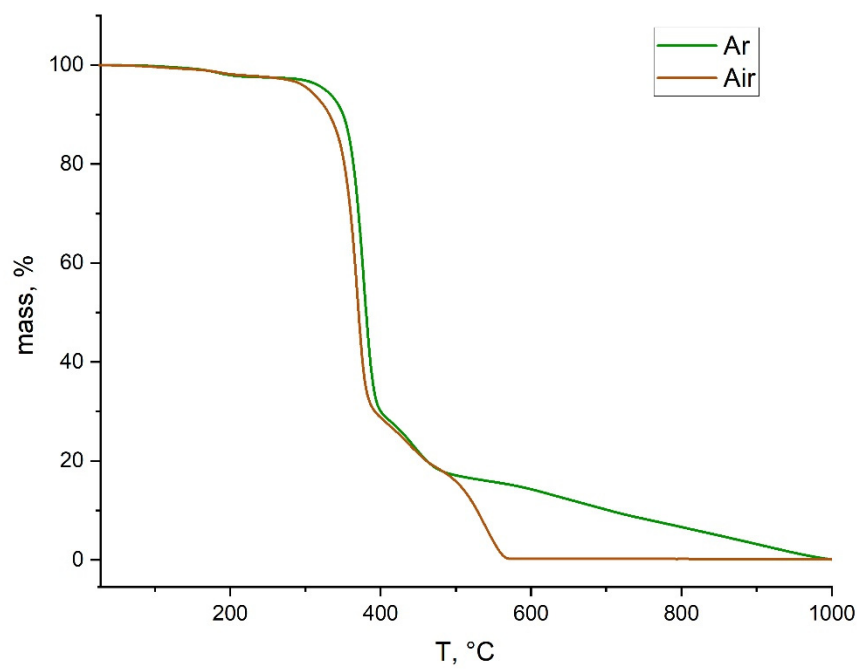

**Figure S39.** TGA curves for **MP3**.

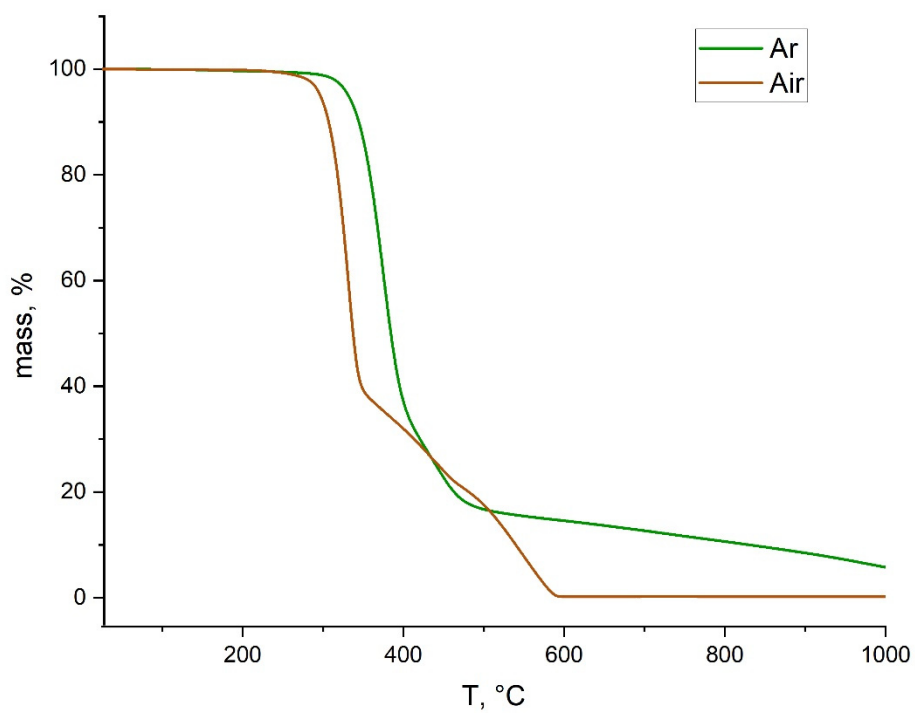

**Figure S40.** TGA curves for **MP4**.

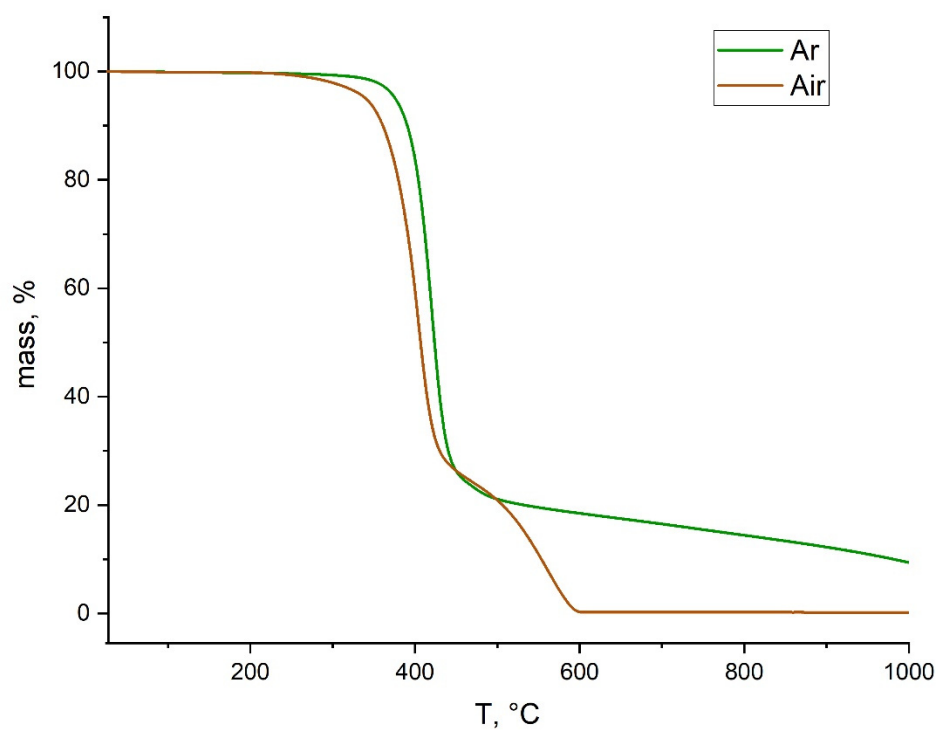

**Figure S41.** TGA curves for **MP5**.

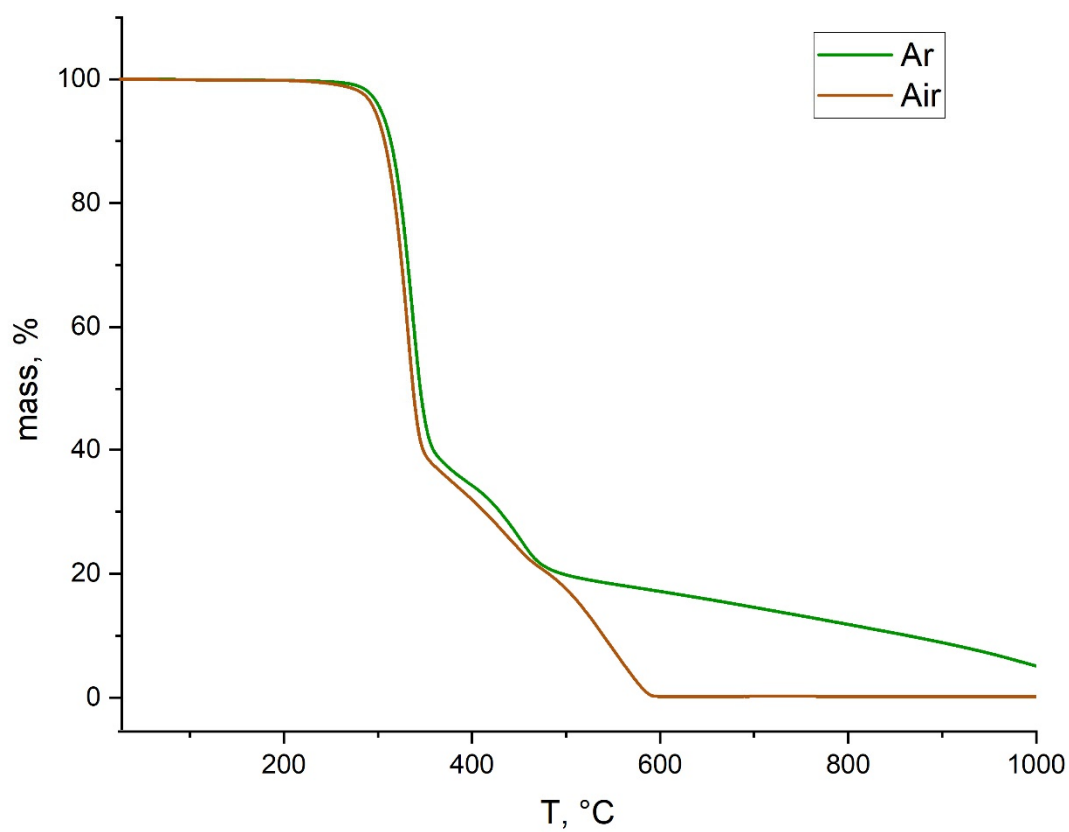

**Figure S42.** TGA curves for **MP6**.

## WAXD study of MP1

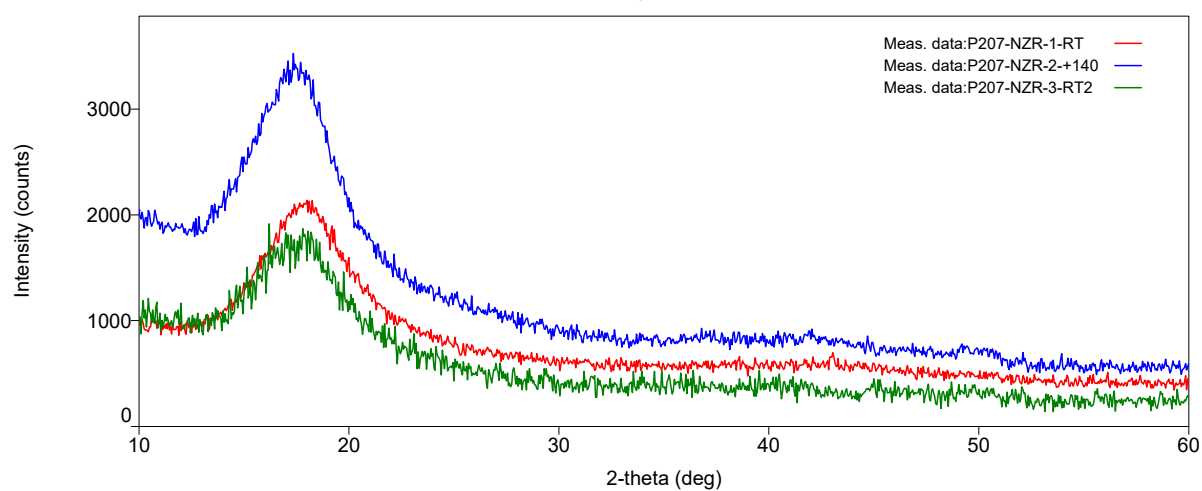

**Figure S43.** WAXD patterns of MP1 before (the middle red line, obtained at room temperature), after heating at 140°C (the bottom green line, obtained at room temperature), and at 140°C (the top blue line).
